# Supplementary material
Source: MDPI journal article supplement (https://www.mdpi.com/2073-4352/13/7/1043)
Supplement: s1 [file s1 › 14 Lu Ha2019_67_0m_a.cif]

 
data_Ha2019_67_0m_a 
  
_audit_creation_method            'SHELXL-2014/7' 
_shelx_SHELXL_version_number      '2014/7' 
_chemical_name_systematic         ? 
_chemical_name_common             ? 
_chemical_melting_point           ? 
_chemical_formula_moiety          ? 
_chemical_formula_sum 
 'C4 H12 Cl Lu O7' 
_chemical_formula_weight          382.56 
  
loop_ 
 _atom_type_symbol 
 _atom_type_description 
 _atom_type_scat_dispersion_real 
 _atom_type_scat_dispersion_imag 
 _atom_type_scat_source 
 'C'  'C'   0.0033   0.0016 
 'International Tables Vol C Tables 4.2.6.8 and 6.1.1.4' 
 'H'  'H'   0.0000   0.0000 
 'International Tables Vol C Tables 4.2.6.8 and 6.1.1.4' 
 'O'  'O'   0.0106   0.0060 
 'International Tables Vol C Tables 4.2.6.8 and 6.1.1.4' 
 'Cl'  'Cl'   0.1484   0.1585 
 'International Tables Vol C Tables 4.2.6.8 and 6.1.1.4' 
 'Lu'  'Lu'  -0.4720   5.8584 
 'International Tables Vol C Tables 4.2.6.8 and 6.1.1.4' 
  
_space_group_crystal_system       monoclinic 
_space_group_IT_number            14 
_space_group_name_H-M_alt         'P 21/n' 
_space_group_name_Hall            '-P 2yn' 
  
_shelx_space_group_comment 
; 
The symmetry employed for this shelxl refinement is uniquely defined 
by the following loop, which should always be used as a source of 
symmetry information in preference to the above space-group names. 
They are only intended as comments. 
; 
  
loop_ 
 _space_group_symop_operation_xyz 
 'x, y, z' 
 '-x+1/2, y+1/2, -z+1/2' 
 '-x, -y, -z' 
 'x-1/2, -y-1/2, z-1/2' 
  
_cell_length_a                    7.7668(3) 
_cell_length_b                    7.8297(3) 
_cell_length_c                    17.0618(7) 
_cell_angle_alpha                 90 
_cell_angle_beta                  97.336(2) 
_cell_angle_gamma                 90 
_cell_volume                      1029.06(7) 
_cell_formula_units_Z             4 
_cell_measurement_temperature     100(2) 
_cell_measurement_reflns_used     9942 
_cell_measurement_theta_min       2.41 
_cell_measurement_theta_max       27.12 
  
_exptl_crystal_description        prism 
_exptl_crystal_colour             colourless 
_exptl_crystal_density_meas       ? 
_exptl_crystal_density_method     ? 
_exptl_crystal_density_diffrn     2.469 
_exptl_crystal_F_000              720 
_exptl_transmission_factor_min    ? 
_exptl_transmission_factor_max    ? 
_exptl_crystal_size_max           0.292 
_exptl_crystal_size_mid           0.065 
_exptl_crystal_size_min           0.057 
_exptl_absorpt_coefficient_mu     9.857 
_shelx_estimated_absorpt_T_min    0.161 
_shelx_estimated_absorpt_T_max    0.603 
_exptl_absorpt_correction_type    multi-scan 
_exptl_absorpt_correction_T_min   0.356 
_exptl_absorpt_correction_T_max   0.749 
_exptl_absorpt_process_details    'Bruker SADABS' 
_exptl_absorpt_special_details    ? 
_diffrn_ambient_temperature       100(2) 
_diffrn_radiation_wavelength      0.71073 
_diffrn_radiation_type            MoK\a 
_diffrn_source                    ? 
_diffrn_measurement_device_type   'Bruker APEX-II CCD' 
_diffrn_measurement_method        '\f and \w scans' 
_diffrn_detector_area_resol_mean  ? 
_diffrn_reflns_number             100183 
_diffrn_reflns_av_unetI/netI      0.0149 
_diffrn_reflns_av_R_equivalents   0.0653 
_diffrn_reflns_limit_h_min        -10 
_diffrn_reflns_limit_h_max        10 
_diffrn_reflns_limit_k_min        -10 
_diffrn_reflns_limit_k_max        10 
_diffrn_reflns_limit_l_min        -22 
_diffrn_reflns_limit_l_max        22 
_diffrn_reflns_theta_min          2.762 
_diffrn_reflns_theta_max          27.999 
_diffrn_reflns_theta_full         25.242 
_diffrn_measured_fraction_theta_max   1.000 
_diffrn_measured_fraction_theta_full  0.999 
_diffrn_reflns_Laue_measured_fraction_max    1.000 
_diffrn_reflns_Laue_measured_fraction_full   0.999 
_diffrn_reflns_point_group_measured_fraction_max   1.000 
_diffrn_reflns_point_group_measured_fraction_full  0.999 
_reflns_number_total              2490 
_reflns_number_gt                 2304 
_reflns_threshold_expression      'I > 2\s(I)' 
_reflns_Friedel_coverage          0.000 
_reflns_Friedel_fraction_max      . 
_reflns_Friedel_fraction_full     . 
  
_reflns_special_details 
; 
 Reflections were merged by SHELXL according to the crystal 
 class for the calculation of statistics and refinement. 
  
 _reflns_Friedel_fraction is defined as the number of unique 
 Friedel pairs measured divided by the number that would be 
 possible theoretically, ignoring centric projections and 
 systematic absences. 
; 
  
_computing_data_collection        'Bruker APEX2' 
_computing_cell_refinement        'Bruker SAINT' 
_computing_data_reduction         'Bruker SAINT' 
_computing_structure_solution     'SHELXS-97 (Sheldrick 2008)' 
_computing_structure_refinement 'SHELXL-2014/7 (Sheldrick, 2014)' 
_computing_molecular_graphics     'Bruker SHELXTL' 
_computing_publication_material   'Bruker SHELXTL' 
_refine_special_details           ? 
_refine_ls_structure_factor_coef  Fsqd 
_refine_ls_matrix_type            full 
_refine_ls_weighting_scheme       calc 
_refine_ls_weighting_details 
'w=1/[\s^2^(Fo^2^)+(0.0120P)^2^+0.5974P] where P=(Fo^2^+2Fc^2^)/3' 
_atom_sites_solution_primary      direct 
_atom_sites_solution_secondary    ? 
_atom_sites_solution_hydrogens    mixed 
_refine_ls_hydrogen_treatment     constr 
_refine_ls_extinction_method      none 
_refine_ls_extinction_coef        . 
_refine_ls_number_reflns          2490 
_refine_ls_number_parameters      125 
_refine_ls_number_restraints      0 
_refine_ls_R_factor_all           0.0143 
_refine_ls_R_factor_gt            0.0119 
_refine_ls_wR_factor_ref          0.0270 
_refine_ls_wR_factor_gt           0.0264 
_refine_ls_goodness_of_fit_ref    1.036 
_refine_ls_restrained_S_all       1.036 
_refine_ls_shift/su_max           0.005 
_refine_ls_shift/su_mean          0.000 
  
loop_ 
 _atom_site_label 
 _atom_site_type_symbol 
 _atom_site_fract_x 
 _atom_site_fract_y 
 _atom_site_fract_z 
 _atom_site_U_iso_or_equiv 
 _atom_site_adp_type 
 _atom_site_occupancy 
 _atom_site_site_symmetry_order 
 _atom_site_calc_flag 
 _atom_site_refinement_flags_posn 
 _atom_site_refinement_flags_adp 
 _atom_site_refinement_flags_occupancy 
 _atom_site_disorder_assembly 
 _atom_site_disorder_group 
Lu1 Lu 0.27794(2) 0.44532(2) 0.54250(2) 0.00823(3) Uani 1 1 d . . . . . 
Cl1 Cl 0.37417(7) 0.95408(7) 0.68167(3) 0.01508(11) Uani 1 1 d . . . . . 
O11 O 0.02648(18) 0.3197(2) 0.54522(9) 0.0150(3) Uani 1 1 d . . . . . 
O12 O -0.25789(17) 0.29507(19) 0.52447(9) 0.0119(3) Uani 1 1 d . . . . . 
C11 C -0.1099(3) 0.2368(3) 0.55107(12) 0.0097(4) Uani 1 1 d . . . . . 
C12 C -0.1003(3) 0.0638(3) 0.58910(15) 0.0177(5) Uani 1 1 d . . . . . 
H12A H -0.1185 -0.0244 0.5481 0.048(6) Uiso 1 1 calc R U . . . 
H12B H -0.1904 0.0543 0.6242 0.048(6) Uiso 1 1 calc R U . . . 
H12C H 0.0141 0.0485 0.6198 0.048(6) Uiso 1 1 calc R U . . . 
O21 O 0.54090(18) 0.56165(18) 0.57449(9) 0.0109(3) Uani 1 1 d . . . . . 
O22 O 0.81350(18) 0.63322(19) 0.58967(9) 0.0118(3) Uani 1 1 d . . . . . 
C21 C 0.6780(3) 0.6008(3) 0.62074(13) 0.0103(4) Uani 1 1 d . . . . . 
C22 C 0.6780(3) 0.6054(3) 0.70767(13) 0.0172(5) Uani 1 1 d . . . . . 
H22A H 0.7971 0.5927 0.7339 0.058(6) Uiso 1 1 calc R U . . . 
H22B H 0.6064 0.5118 0.7237 0.058(6) Uiso 1 1 calc R U . . . 
H22C H 0.6305 0.7147 0.7229 0.058(6) Uiso 1 1 calc R U . . . 
O1W O 0.41620(18) 0.18526(19) 0.53749(9) 0.0128(3) Uani 1 1 d . . . . . 
H11W H 0.4107 0.0959 0.5756 0.045(7) Uiso 1 1 d R U . . . 
H12W H 0.5364 0.1918 0.5299 0.045(7) Uiso 1 1 d R U . . . 
O2W O 0.16313(18) 0.63368(19) 0.62551(9) 0.0124(3) Uani 1 1 d . . . . . 
H21W H 0.0408 0.6538 0.6238 0.040(6) Uiso 1 1 d R U . . . 
H22W H 0.2169 0.7408 0.6412 0.040(6) Uiso 1 1 d R U . . . 
O3W O 0.32408(19) 0.3438(2) 0.67287(9) 0.0151(3) Uani 1 1 d . . . . . 
H31W H 0.2652 0.3935 0.7135 0.056(7) Uiso 1 1 d R U . . . 
H32W H 0.3357 0.2250 0.6864 0.056(7) Uiso 1 1 d R U . . . 
  
loop_ 
 _atom_site_aniso_label 
 _atom_site_aniso_U_11 
 _atom_site_aniso_U_22 
 _atom_site_aniso_U_33 
 _atom_site_aniso_U_23 
 _atom_site_aniso_U_13 
 _atom_site_aniso_U_12 
Lu1 0.00532(5) 0.00828(5) 0.01117(5) 0.00031(4) 0.00136(3) -0.00098(3) 
Cl1 0.0178(3) 0.0110(2) 0.0165(3) 0.0010(2) 0.0025(2) -0.0019(2) 
O11 0.0098(7) 0.0160(8) 0.0202(8) -0.0033(7) 0.0054(6) -0.0046(6) 
O12 0.0072(7) 0.0128(8) 0.0155(8) 0.0023(6) 0.0013(6) 0.0000(6) 
C11 0.0096(9) 0.0118(10) 0.0082(10) -0.0028(8) 0.0030(8) -0.0014(8) 
C12 0.0162(11) 0.0155(11) 0.0212(12) 0.0038(10) 0.0020(9) 0.0016(9) 
O21 0.0081(7) 0.0123(8) 0.0119(7) -0.0005(6) 0.0001(6) -0.0002(6) 
O22 0.0070(7) 0.0129(8) 0.0156(8) -0.0002(6) 0.0014(6) -0.0012(6) 
C21 0.0098(10) 0.0049(9) 0.0154(11) 0.0009(8) -0.0011(8) 0.0031(8) 
C22 0.0139(11) 0.0265(13) 0.0109(11) -0.0004(10) 0.0000(9) 0.0014(9) 
O1W 0.0100(7) 0.0121(8) 0.0173(8) 0.0020(6) 0.0049(6) 0.0009(6) 
O2W 0.0082(7) 0.0117(8) 0.0171(8) -0.0030(6) 0.0014(6) -0.0007(6) 
O3W 0.0192(8) 0.0117(8) 0.0155(8) 0.0018(7) 0.0059(6) 0.0033(7) 
  
_geom_special_details 
; 
 All esds (except the esd in the dihedral angle between two l.s. planes) 
 are estimated using the full covariance matrix.  The cell esds are taken 
 into account individually in the estimation of esds in distances, angles 
 and torsion angles; correlations between esds in cell parameters are only 
 used when they are defined by crystal symmetry.  An approximate (isotropic) 
 treatment of cell esds is used for estimating esds involving l.s. planes. 
; 
  
loop_ 
 _geom_bond_atom_site_label_1 
 _geom_bond_atom_site_label_2 
 _geom_bond_distance 
 _geom_bond_site_symmetry_2 
 _geom_bond_publ_flag 
Lu1 O11 2.1926(14) . ? 
Lu1 O21 2.2392(14) . ? 
Lu1 O2W 2.3017(15) . ? 
Lu1 O1W 2.3087(15) . ? 
Lu1 O12 2.3273(15) 3_566 ? 
Lu1 O3W 2.3460(15) . ? 
Lu1 O22 2.3578(15) 3_666 ? 
Lu1 O21 2.5854(15) 3_666 ? 
Lu1 O11 3.2114(15) 3_566 ? 
O11 C11 1.257(2) . ? 
O12 C11 1.266(2) . ? 
C11 C12 1.500(3) . ? 
C12 H12A 0.9800 . ? 
C12 H12B 0.9800 . ? 
C12 H12C 0.9800 . ? 
O21 C21 1.279(3) . ? 
O22 C21 1.263(3) . ? 
C21 C22 1.484(3) . ? 
C22 H22A 0.9800 . ? 
C22 H22B 0.9800 . ? 
C22 H22C 0.9800 . ? 
O1W H11W 0.9600 . ? 
O1W H12W 0.9600 . ? 
O2W H21W 0.9600 . ? 
O2W H22W 0.9600 . ? 
O3W H31W 0.9600 . ? 
O3W H32W 0.9600 . ? 
  
loop_ 
 _geom_angle_atom_site_label_1 
 _geom_angle_atom_site_label_2 
 _geom_angle_atom_site_label_3 
 _geom_angle 
 _geom_angle_site_symmetry_1 
 _geom_angle_site_symmetry_3 
 _geom_angle_publ_flag 
O11 Lu1 O21 164.70(6) . . ? 
O11 Lu1 O2W 81.86(5) . . ? 
O21 Lu1 O2W 90.14(5) . . ? 
O11 Lu1 O1W 91.42(5) . . ? 
O21 Lu1 O1W 87.35(5) . . ? 
O2W Lu1 O1W 143.75(5) . . ? 
O11 Lu1 O12 113.47(5) . 3_566 ? 
O21 Lu1 O12 76.48(5) . 3_566 ? 
O2W Lu1 O12 74.67(5) . 3_566 ? 
O1W Lu1 O12 138.97(5) . 3_566 ? 
O11 Lu1 O3W 81.76(6) . . ? 
O21 Lu1 O3W 83.26(5) . . ? 
O2W Lu1 O3W 70.00(5) . . ? 
O1W Lu1 O3W 73.79(5) . . ? 
O12 Lu1 O3W 138.93(5) 3_566 . ? 
O11 Lu1 O22 75.10(5) . 3_666 ? 
O21 Lu1 O22 119.55(5) . 3_666 ? 
O2W Lu1 O22 131.49(5) . 3_666 ? 
O1W Lu1 O22 79.59(5) . 3_666 ? 
O12 Lu1 O22 76.41(5) 3_566 3_666 ? 
O3W Lu1 O22 144.03(5) . 3_666 ? 
O11 Lu1 O21 125.51(5) . 3_666 ? 
O21 Lu1 O21 68.12(6) . 3_666 ? 
O2W Lu1 O21 141.29(5) . 3_666 ? 
O1W Lu1 O21 69.59(5) . 3_666 ? 
O12 Lu1 O21 69.41(5) 3_566 3_666 ? 
O3W Lu1 O21 133.83(5) . 3_666 ? 
O22 Lu1 O21 51.92(5) 3_666 3_666 ? 
O11 Lu1 O11 70.26(6) . 3_566 ? 
O21 Lu1 O11 118.35(5) . 3_566 ? 
O2W Lu1 O11 66.40(5) . 3_566 ? 
O1W Lu1 O11 143.74(5) . 3_566 ? 
O12 Lu1 O11 43.25(4) 3_566 3_566 ? 
O3W Lu1 O11 130.56(5) . 3_566 ? 
O22 Lu1 O11 65.78(5) 3_666 3_566 ? 
O21 Lu1 O11 95.34(4) 3_666 3_566 ? 
Lu1 Lu1 Lu1 133.215(5) 3_666 3_566 ? 
C11 O11 Lu1 174.41(15) . . ? 
C11 O12 Lu1 119.44(13) . 3_566 ? 
O11 C11 O12 121.4(2) . . ? 
O11 C11 C12 120.32(19) . . ? 
O12 C11 C12 118.24(18) . . ? 
C11 C12 H12A 109.5 . . ? 
C11 C12 H12B 109.5 . . ? 
H12A C12 H12B 109.5 . . ? 
C11 C12 H12C 109.5 . . ? 
H12A C12 H12C 109.5 . . ? 
H12B C12 H12C 109.5 . . ? 
C21 O21 Lu1 155.43(15) . . ? 
C21 O21 Lu1 89.38(12) . 3_666 ? 
Lu1 O21 Lu1 111.88(6) . 3_666 ? 
C21 O22 Lu1 100.59(13) . 3_666 ? 
O22 C21 O21 117.5(2) . . ? 
O22 C21 C22 121.42(19) . . ? 
O21 C21 C22 121.07(19) . . ? 
O22 C21 Lu1 53.80(11) . 3_666 ? 
O21 C21 Lu1 64.18(11) . 3_666 ? 
C22 C21 Lu1 171.02(15) . 3_666 ? 
C21 C22 H22A 109.5 . . ? 
C21 C22 H22B 109.5 . . ? 
H22A C22 H22B 109.5 . . ? 
C21 C22 H22C 109.5 . . ? 
H22A C22 H22C 109.5 . . ? 
H22B C22 H22C 109.5 . . ? 
Lu1 O1W H11W 123.8 . . ? 
Lu1 O1W H12W 115.0 . . ? 
H11W O1W H12W 105.0 . . ? 
Lu1 O2W H21W 123.1 . . ? 
Lu1 O2W H22W 122.9 . . ? 
H21W O2W H22W 105.0 . . ? 
Lu1 O3W H31W 121.2 . . ? 
Lu1 O3W H32W 123.6 . . ? 
H31W O3W H32W 105.0 . . ? 
  
loop_ 
 _geom_hbond_atom_site_label_D 
 _geom_hbond_atom_site_label_H 
 _geom_hbond_atom_site_label_A 
 _geom_hbond_distance_DH 
 _geom_hbond_distance_HA 
 _geom_hbond_distance_DA 
 _geom_hbond_angle_DHA 
 _geom_hbond_site_symmetry_A 
O1W H11W Cl1  0.96 2.17 3.1048(16) 163.5 1_545 
O1W H12W O12  0.96 1.80 2.7092(19) 156.0 1_655 
O2W H21W O22  0.96 1.79 2.706(2) 157.5 1_455 
O2W H22W Cl1  0.96 2.13 3.0818(15) 170.5 . 
O3W H31W Cl1  0.96 2.26 3.2017(16) 168.1 2_546 
O3W H32W Cl1  0.96 2.14 3.0775(16) 163.5 1_545 
  
_refine_diff_density_max    0.365 
_refine_diff_density_min   -0.421 
_refine_diff_density_rms    0.090 
  
_shelx_res_file 
; 
  
    Ha2019_67_0m_a.res created by SHELXL-2014/7 
  
  
TITL Ha2019_67_0m_a.res in P2(1)/n 
CELL  0.71073   7.7668   7.8297  17.0618   90.000   97.336   90.000 
ZERR    4.000   0.0003   0.0003   0.0007    0.000    0.002    0.000 
LATT 1 
SYMM 1/2-X, 1/2+Y, 1/2-Z 
SFAC C  H  O  Cl Lu 
UNIT 16 48 28 4 4 
LIST 4 ! automatically inserted. Change 6 to 4 for CHECKCIF!! 
OMIT -3 56 
L.S. 10 
FREE Lu1 C21_$6 
EQIV $6 1-x, 1-y, 1-z 
BIND Lu1 Lu1_$6 
BIND Lu1 Lu1_$7 
EQIV $7 -x,1-y,1-z 
BIND Lu1 O11_$7 
ACTA 
BOND $H 
FMAP 2 
PLAN 5 
SIZE  0.057  0.065  0.292 
TEMP -173 
  
rem DFIX 0.96  0.0001 O1w H11w O1w H12w O2w H21w O2w H22w O3w H31w O3w H32w 
rem dfix 1.523  0.0001 H11w H12w H21w H22w H31w H32w 
ACTA 
HTAB 
EQIV $1 -x+3/2, y-1/2, -z+3/2 
EQIV $2 x, y-1, z 
HTAB O1W Cl1_$2 
EQIV $3 x+1, y, z 
HTAB O1W O12_$3 
EQIV $4 x-1, y, z 
HTAB O2W O22_$4 
HTAB O2W Cl1 
EQIV $5 -x+1/2, y-1/2, -z+3/2 
HTAB O3W Cl1_$5 
HTAB O3W Cl1_$2 
SIZE 0.057  0.065  0.292 
BOND $H 
FMAP 2 
PLAN 15 
TEMP -173 
WGHT    0.012000    0.597400 
FVAR       0.32957   0.04801   0.05800   0.04505   0.04046   0.05586 
LU1   5    0.277942    0.445321    0.542504    11.00000    0.00532    0.00828 = 
         0.01117    0.00031    0.00136   -0.00098 
CL1   4    0.374170    0.954083    0.681674    11.00000    0.01776    0.01104 = 
         0.01653    0.00097    0.00252   -0.00194 
O11   3    0.026483    0.319667    0.545222    11.00000    0.00979    0.01602 = 
         0.02016   -0.00334    0.00538   -0.00459 
O12   3   -0.257891    0.295065    0.524473    11.00000    0.00717    0.01283 = 
         0.01554    0.00225    0.00126    0.00005 
C11   1   -0.109894    0.236813    0.551066    11.00000    0.00965    0.01178 = 
         0.00821   -0.00282    0.00298   -0.00140 
C12   1   -0.100333    0.063798    0.589097    11.00000    0.01621    0.01549 = 
         0.02119    0.00383    0.00200    0.00159 
AFIX 137 
H12A  2   -0.118461   -0.024419    0.548127    11.00000   21.00000 
H12B  2   -0.190407    0.054265    0.624187    11.00000   21.00000 
H12C  2    0.014117    0.048494    0.619827    11.00000   21.00000 
AFIX   0 
O21   3    0.540902    0.561651    0.574487    11.00000    0.00814    0.01230 = 
         0.01193   -0.00048    0.00014   -0.00016 
O22   3    0.813499    0.633224    0.589667    11.00000    0.00702    0.01289 = 
         0.01559   -0.00019    0.00135   -0.00122 
C21   1    0.678014    0.600850    0.620741    11.00000    0.00980    0.00489 = 
         0.01542    0.00093   -0.00110    0.00311 
C22   1    0.677996    0.605388    0.707666    11.00000    0.01391    0.02650 = 
         0.01090   -0.00036    0.00003    0.00140 
AFIX 137 
H22A  2    0.797126    0.592700    0.733887    11.00000   31.00000 
H22B  2    0.606373    0.511755    0.723681    11.00000   31.00000 
H22C  2    0.630479    0.714709    0.722852    11.00000   31.00000 
AFIX   0 
O1W   3    0.416197    0.185260    0.537492    11.00000    0.01001    0.01209 = 
         0.01726    0.00195    0.00486    0.00089 
AFIX   3 
H11W  2    0.410713    0.095935    0.575636    11.00000   41.00000 
H12W  2    0.536377    0.191790    0.529893    11.00000   41.00000 
AFIX   0 
O2W   3    0.163134    0.633677    0.625506    11.00000    0.00819    0.01170 = 
         0.01714   -0.00300    0.00139   -0.00068 
AFIX   3 
H21W  2    0.040795    0.653839    0.623814    11.00000   51.00000 
H22W  2    0.216920    0.740829    0.641211    11.00000   51.00000 
AFIX   0 
O3W   3    0.324085    0.343827    0.672871    11.00000    0.01922    0.01166 = 
         0.01547    0.00183    0.00594    0.00334 
AFIX   3 
H31W  2    0.265214    0.393515    0.713489    11.00000   61.00000 
H32W  2    0.335662    0.224984    0.686359    11.00000   61.00000 
AFIX   0 
HKLF 4 
  
REM  Ha2019_67_0m_a.res in P2(1)/n 
REM R1 =  0.0119 for    2304 Fo > 4sig(Fo)  and  0.0143 for all    2490 data 
REM    125 parameters refined using      0 restraints 
  
END 
  
WGHT      0.0119      0.5895 
  
REM Instructions for potential hydrogen bonds 
HTAB C12 Cl1_$2 
HTAB C22 Cl1_$1 
HTAB C22 O3W 
HTAB C22 Cl1 
HTAB O1W Cl1_$2 
HTAB O1W O12_$3 
HTAB O2W O22_$4 
HTAB O2W Cl1 
HTAB O3W Cl1_$5 
HTAB O3W Cl1_$2 
  
REM Highest difference peak  0.365,  deepest hole -0.421,  1-sigma level  0.090 
Q1    1   0.3968  0.1191  0.5585  11.00000  0.05    0.37 
Q2    1   0.6831  0.5881  0.6678  11.00000  0.05    0.35 
Q3    1   0.5806  0.5967  0.7135  11.00000  0.05    0.33 
Q4    1   0.5761  0.5458  0.5333  11.00000  0.05    0.33 
Q5    1   0.4185  0.4559  0.5401  11.00000  0.05    0.32 
Q6    1   0.3296  0.8547  0.6904  11.00000  0.05    0.31 
Q7    1  -0.1058  0.1476  0.5685  11.00000  0.05    0.31 
Q8    1   0.4085  1.0745  0.6712  11.00000  0.05    0.30 
Q9    1   0.0875  0.0710  0.5885  11.00000  0.05    0.30 
Q10   1  -0.0089  0.0170  0.6014  11.00000  0.05    0.30 
Q11   1   0.4812  0.2027  0.5347  11.00000  0.05    0.29 
Q12   1   0.6128  0.5564  0.5942  11.00000  0.05    0.28 
Q13   1   0.0972  0.2166  0.6148  11.00000  0.05    0.28 
Q14   1  -0.1942  0.2937  0.5453  11.00000  0.05    0.28 
Q15   1   0.2881  0.3751  0.6290  11.00000  0.05    0.28 
; 
_shelx_res_checksum   74538 
  
_shelx_hkl_file 
; 
   1   0   0   -1.50    1.10 
   1   0   0    0.80    2.00 
   1   0   0    3.40    3.20 
  -1   0   0    2.20    2.30 
  -1   0   0    5.00    2.70 
  -1   0   0    9.10    2.10 
  -1   0   0    8.40    2.00 
  -1   0   0   -0.30    1.80 
  -1   0   0    4.00    2.80 
  -1   0   0   14.10    3.50 
  -1   0   0    7.60    3.30 
  -1   0   0    2.20    2.30 
  -1   0   0    5.90    3.60 
  -1   0   0    6.00    2.90 
  -1   0   0    9.00    3.70 
  -1   0   0    7.30    2.70 
  -1   0   0   10.30    3.00 
  -1   0   0    8.10    3.50 
  -1   0   0    4.40    2.50 
  -1   0   0   11.00    3.80 
  -1   0   0    0.60    2.20 
  -1   0   0    3.70    2.50 
  -1   0   0    5.30    2.80 
  -1   0   0    9.00    3.70 
  -1   0   0    4.10    2.60 
  -1   0   0    2.40    2.80 
  -1   0   0   10.20    2.90 
  -1   0   0    3.30    2.70 
  -1   0   0   -0.40    1.80 
  -1   0   0    4.40    2.70 
   1   0   0    3.10    2.50 
   1   0   0    1.40    2.10 
   1   0   0   -2.00    1.90 
   1   0   0    0.40    1.30 
   1   0   0    0.10    1.70 
   1   0   0   -0.20    1.50 
   1   0   0    0.50    1.70 
   1   0   0    0.60    2.30 
   1   0   0    0.10    2.00 
   1   0   0    0.90    1.60 
  -2   0   0 7825.92  241.08 
  -2   0   0 7363.76  234.18 
  -2   0   0 8067.59  237.18 
   2   0   0 7851.11  243.38 
   2   0   0 7838.42  235.38 
   2   0   0 7968.20  240.78 
   2   0   0 7918.81  237.88 
   2   0   0 7775.92  242.48 
   2   0   0 7925.61  237.18 
   2   0   0 7708.23  241.58 
   2   0   0 7829.92  234.98 
   2   0   0 7570.94  233.08 
   2   0   0 7734.43  241.48 
   2   0   0 7839.22  236.08 
   2   0   0 7988.10  241.58 
   2   0   0 7598.34  245.68 
   2   0   0 7910.71  241.18 
   2   0   0 7584.44  242.38 
   2   0   0 8009.30  240.78 
   2   0   0 7846.51  234.98 
   2   0   0 7619.44  242.08 
   2   0   0 7668.93  243.48 
  -2   0   0 7832.52  242.88 
  -2   0   0 8051.19  235.28 
  -2   0   0 8045.40  240.78 
  -2   0   0 8144.89  238.08 
  -2   0   0 7822.82  242.68 
  -2   0   0 8148.88  244.48 
  -2   0   0 7780.22  242.78 
  -2   0   0 8048.69  245.68 
  -2   0   0 7551.54  233.78 
  -2   0   0 7965.30  240.98 
  -2   0   0 8086.29  236.48 
  -2   0   0 7767.32  240.88 
  -2   0   0 7875.81  246.08 
  -2   0   0 7714.23  241.58 
  -2   0   0 8162.18  247.28 
  -2   0   0 7674.13  237.98 
  -2   0   0 7830.72  240.28 
  -2   0   0 7825.02  242.18 
  -2   0   0 7982.90  237.38 
  -2   0   0 7785.82  239.18 
  -2   0   0 7554.14  233.98 
  -2   0   0 7656.53  241.48 
  -2   0   0 8119.49  229.48 
  -2   0   0 7963.30  243.18 
   2   0   0 7913.11  244.88 
   2   0   0 7745.52  236.38 
  -2   0   0 7787.82  229.58 
  -2   0   0 7721.03  235.58 
   3   0   0    6.40    7.60 
   3   0   0    6.20    9.30 
   3   0   0   -8.20    7.80 
   3   0   0   -6.00    6.30 
  -3   0   0    3.30    5.50 
   3   0   0    0.90    6.30 
   3   0   0   -3.10    4.10 
   3   0   0    9.10    9.00 
   3   0   0   -2.00    6.60 
  -3   0   0   -1.50    4.80 
  -3   0   0    5.50    7.30 
  -3   0   0    8.50    6.00 
  -3   0   0    2.90    4.20 
  -3   0   0    0.10    3.50 
  -3   0   0    7.40    7.10 
  -3   0   0    2.90    5.20 
  -3   0   0    3.00    6.60 
  -3   0   0    6.00    6.20 
  -3   0   0    5.20    7.60 
  -3   0   0    2.20    6.20 
  -3   0   0   -1.80    5.40 
  -3   0   0   14.90   10.00 
  -3   0   0   -0.40    5.00 
  -3   0   0    0.20    5.50 
   3   0   0   -0.80    5.20 
   3   0   0   -1.90    6.00 
   3   0   0    0.50    5.20 
   3   0   0    4.20    6.90 
   3   0   0   -4.00    4.20 
   3   0   0   -3.20    4.70 
   3   0   0    9.00    7.20 
   3   0   0    0.50    4.90 
   3   0   0   -2.10    4.10 
   3   0   0    2.10    8.10 
  -3   0   0    0.00    5.50 
  -3   0   0    4.80    7.20 
   3   0   0   10.90    6.40 
  -3   0   0   -0.30    6.70 
  -3   0   0   -0.70    3.90 
  -3   0   0   -0.60    3.90 
  -3   0   0    5.00    4.80 
  -3   0   0   -1.60    4.80 
  -3   0   0   -5.60    5.10 
   3   0   0    3.50    6.30 
   4   0   0 1597.24   65.79 
  -4   0   0 1660.53   77.09 
  -4   0   0 1598.14   85.69 
  -4   0   0 1585.94   68.59 
   4   0   0 1735.33   73.89 
   4   0   0 1717.63   84.09 
   4   0   0 1641.64   80.29 
   4   0   0 1669.63   72.39 
  -4   0   0 1610.34   73.19 
  -4   0   0 1520.35   70.59 
  -4   0   0 1698.83   69.49 
  -4   0   0 1758.12   68.39 
  -4   0   0 1586.44   65.99 
  -4   0   0 1650.83   70.79 
  -4   0   0 1607.84   78.09 
  -4   0   0 1528.85   84.29 
  -4   0   0 1634.44   76.59 
   4   0   0 1616.04   70.09 
  -4   0   0 1672.53   84.79 
  -4   0   0 1666.33   70.89 
  -4   0   0 1609.64   63.39 
  -4   0   0 1734.93   63.79 
  -4   0   0 1531.35   80.19 
  -4   0   0 1594.14   68.89 
   4   0   0 1679.13   75.09 
   4   0   0 1542.65   78.39 
   4   0   0 1572.44   77.89 
   4   0   0 1551.54   80.29 
   4   0   0 1568.44   76.89 
   4   0   0 1574.24   81.79 
   4   0   0 1675.93   83.69 
   4   0   0 1522.05   67.59 
   4   0   0 1676.23   79.19 
   4   0   0 1553.04   84.99 
   4   0   0 1528.35   69.49 
   5   0   0   -5.80    6.50 
  -5   0   0    2.80    9.20 
  -5   0   0    3.40    8.50 
  -5   0   0    2.40    6.10 
  -5   0   0    6.00    8.60 
   5   0   0    0.60    7.10 
   5   0   0   10.00    9.70 
  -5   0   0    1.40    8.80 
  -5   0   0   -6.00    7.50 
  -5   0   0    4.30    7.00 
   5   0   0   -4.20    6.20 
  -5   0   0    1.40    8.90 
   5   0   0   -2.80   10.80 
   5   0   0   -8.30    7.40 
   5   0   0   -0.30    9.50 
  -5   0   0    7.70   10.60 
  -5   0   0   -0.80    4.70 
   5   0   0    9.10    7.10 
   5   0   0    3.20   10.70 
   5   0   0   -1.80    8.70 
  -5   0   0    2.00   11.20 
  -5   0   0    0.70    6.90 
   5   0   0    3.40    8.00 
   5   0   0    4.70   10.10 
   5   0   0    2.10    8.20 
  -5   0   0    3.00    9.30 
   5   0   0   21.90   14.60 
  -5   0   0    0.70    5.90 
   5   0   0   -6.70    9.20 
  -5   0   0    2.60    7.50 
  -6   0   0  538.05   62.99 
   6   0   0  482.25   56.09 
  -6   0   0  542.15   67.89 
   6   0   0  564.64   43.60 
  -6   0   0  492.55   39.30 
  -6   0   0  518.95   37.30 
   6   0   0  528.35   36.50 
   6   0   0  615.64   66.79 
  -6   0   0  568.24   39.80 
   6   0   0  466.15   55.49 
   6   0   0  620.24   42.40 
  -6   0   0  571.64   57.79 
   6   0   0  582.04   70.99 
  -6   0   0  579.84   44.00 
  -6   0   0  712.33   56.69 
  -6   0   0  616.84   73.19 
  -6   0   0  547.75   37.80 
  -6   0   0  491.35   51.89 
  -6   0   0  501.85   62.49 
   6   0   0  473.85   51.39 
   6   0   0  490.25   57.29 
   6   0   0  544.35   62.99 
   6   0   0  487.95   55.39 
   6   0   0  621.24   60.19 
   6   0   0  491.35   60.19 
  -6   0   0  490.95   49.00 
   6   0   0  441.56   58.29 
   7   0   0   32.10   17.80 
   7   0   0  -18.70   12.30 
   7   0   0   -5.40   12.20 
   7   0   0   -5.40   16.60 
  -7   0   0  -11.70    7.60 
   7   0   0    2.50   16.60 
   7   0   0    4.30   16.20 
  -7   0   0    9.20   17.40 
   7   0   0    4.30   13.70 
  -7   0   0   13.30   12.60 
  -7   0   0   -0.10    8.20 
   7   0   0    6.80   10.60 
  -7   0   0    7.40   12.60 
  -7   0   0   12.10   15.40 
  -7   0   0    2.30   16.00 
  -7   0   0    0.10    9.10 
  -7   0   0    4.10   13.20 
  -7   0   0    6.40   14.90 
  -7   0   0   -0.50   16.70 
  -7   0   0    9.80   10.70 
  -7   0   0   11.00   15.90 
   7   0   0   -5.70    9.00 
   7   0   0  -12.70   12.90 
   7   0   0   -0.70   12.10 
   7   0   0   -1.90   13.80 
   7   0   0   -4.60    9.40 
   7   0   0    3.90   14.00 
   8   0   0   64.69   28.70 
   8   0   0   79.79   33.20 
   8   0   0  119.79   39.10 
   8   0   0  116.89   36.40 
   8   0   0   77.59   34.00 
   8   0   0   62.69   25.20 
   8   0   0   79.19   28.40 
  -8   0   0   39.70   29.30 
  -8   0   0  108.29   40.40 
  -8   0   0   66.99   25.30 
  -8   0   0  110.89   30.40 
  -8   0   0   78.59   25.50 
   8   0   0   58.99   27.60 
   8   0   0  110.89   33.00 
   8   0   0   79.49   26.80 
  -8   0   0   41.60   27.00 
  -8   0   0   84.49   30.10 
  -8   0   0  107.69   28.70 
  -8   0   0  135.79   35.30 
  -8   0   0   41.90   23.10 
   8   0   0   55.49   28.40 
   9   0   0   13.10   21.20 
   9   0   0    5.90   17.90 
   9   0   0    8.40   23.30 
   9   0   0    1.10   18.50 
   9   0   0   -7.80   19.30 
  -9   0   0   23.60   19.40 
   9   0   0   21.70   22.10 
  -9   0   0  -20.80   21.70 
  -9   0   0  -15.10   17.10 
   9   0   0   10.50   20.20 
  -9   0   0    0.30   19.00 
  -9   0   0    3.30   17.80 
  -9   0   0   -6.10   15.20 
  -9   0   0    3.20   18.30 
  -9   0   0   -0.80   16.40 
  -9   0   0   13.80   26.90 
  -9   0   0   68.19   33.30 
   9   0   0   21.80   24.80 
   9   0   0   13.40   20.40 
 -10   0   0   48.60   32.70 
  10   0   0   37.10   29.20 
 -10   0   0   27.50   25.40 
  10   0   0   27.10   27.50 
 -10   0   0   58.19   40.10 
 -10   0   0   53.89   38.80 
 -10   0   0   39.40   30.70 
 -10   0   0   37.40   37.30 
  10   0   0  127.29   45.90 
  10   0   0   34.70   28.70 
  10   0   0   71.89   32.70 
 -10   0   0   47.20   29.50 
  10   0   0   49.70   31.90 
 -10   0   0   38.00   28.60 
  10   0   0   88.09   37.80 
   0  -1   0   -0.50    1.40 
   0  -1   0    3.50    2.60 
   0  -1   0    1.40    1.80 
   0  -1   0   -2.00    1.30 
   0  -1   0   -0.60    1.20 
   0  -1   0    0.50    1.80 
   0  -1   0   -1.20    1.20 
   0  -1   0   -0.80    1.10 
   0  -1   0    0.70    1.70 
   0   1   0   -0.30    1.40 
   0   1   0   -0.90    1.50 
   0   1   0    3.70    2.80 
   0   1   0    4.10    3.80 
   0   1   0    4.40    2.40 
   0   1   0    3.10    2.20 
   0   1   0    4.20    3.20 
   0   1   0    3.60    2.50 
   0   1   0    1.50    2.20 
   0   1   0    2.10    2.20 
   0   1   0    6.10    5.00 
   0   1   0    6.60    2.90 
   0   1   0   10.90    3.90 
   0   1   0    8.60    4.70 
   0   1   0    7.80    3.90 
   0   1   0    8.60    3.10 
   0   1   0    2.50    2.00 
   0   1   0    6.80    3.20 
   0   1   0   -0.40    1.90 
   0   1   0    7.40    3.00 
  -1  -1   0  121.09   15.10 
  -1  -1   0   99.59   12.50 
  -1  -1   0  102.59    6.30 
  -1  -1   0  110.19   12.90 
  -1  -1   0  113.29   13.70 
  -1  -1   0  110.39   12.90 
  -1  -1   0  115.39   15.70 
  -1  -1   0  111.09   13.90 
  -1  -1   0  103.69   12.50 
  -1  -1   0   98.49   10.50 
  -1  -1   0   98.69   12.00 
  -1  -1   0   69.99   11.00 
  -1  -1   0  101.79   12.30 
  -1  -1   0   99.59   11.20 
   1  -1   0  107.49   11.10 
  -1  -1   0   86.99   11.80 
  -1  -1   0   95.59   11.40 
  -1  -1   0   62.89    8.80 
  -1  -1   0   81.79   11.00 
  -1  -1   0   58.29    9.40 
   1  -1   0  103.09   11.00 
   1  -1   0  103.19   12.50 
  -1  -1   0  109.69   13.40 
   1  -1   0   99.69   12.10 
   1  -1   0  108.09   13.50 
  -1  -1   0   99.09   10.80 
  -1  -1   0  110.19   12.80 
   1  -1   0   86.59   11.20 
   1  -1   0   97.59   10.60 
   1  -1   0   50.79    8.30 
  -1  -1   0  102.79   11.90 
  -1  -1   0   81.39    9.60 
  -1  -1   0  119.79   13.40 
  -1  -1   0  120.09   13.10 
   1  -1   0  106.89   13.00 
  -1  -1   0  109.29   13.70 
  -1  -1   0   68.69   10.90 
   1  -1   0   90.59   11.00 
  -1   1   0  115.99   12.80 
   1   1   0  123.19   12.30 
   1   1   0   93.69   12.10 
  -1   1   0  114.99   13.20 
  -1   1   0  109.69   11.50 
  -1   1   0  111.09   11.10 
  -1   1   0  102.99   13.20 
   1   1   0   73.49   11.60 
  -1   1   0  101.69   10.60 
  -1   1   0  103.89   11.40 
   1   1   0   90.49   10.50 
  -1   1   0  127.69   12.70 
  -1   1   0  111.49   10.80 
  -1   1   0   97.39   10.90 
  -1   1   0   99.69    8.40 
   1   1   0   97.49   12.00 
   1   1   0  107.09   12.90 
  -1   1   0  111.39   11.40 
  -1   1   0  115.69   13.40 
   1   1   0  101.69   12.50 
   1   1   0   94.49    9.40 
  -1   1   0  106.69   12.60 
  -1   1   0  111.39   11.40 
   1   1   0  134.59   14.60 
   1   1   0  108.09   13.30 
   1   1   0   96.69   12.50 
  -1   1   0   94.09   11.30 
   1   1   0  119.29   13.10 
   1   1   0   99.39   10.60 
   1   1   0   90.99   11.60 
  -1   1   0  112.19   11.90 
   1   1   0  104.89   12.70 
   1   1   0  125.99   14.20 
   1   1   0  114.59   12.90 
  -1   1   0  100.89   10.80 
   1   1   0  131.39   15.30 
  -1   1   0   91.09   10.10 
   1   1   0   89.39   13.00 
   1   1   0   87.89   11.70 
   1   1   0   99.99   12.30 
   1   1   0   89.89    9.60 
  -1   1   0  118.79   13.70 
  -1   1   0  105.79   12.50 
   1   1   0  115.69   13.40 
  -1   1   0  108.89   12.50 
   1   1   0   89.59   11.20 
   1   1   0   99.49   12.30 
  -2  -1   0 1032.10   46.90 
   2  -1   0 1041.60   48.10 
   2  -1   0 1080.49   48.80 
  -2  -1   0  987.70   45.30 
  -2  -1   0 1067.69   46.90 
  -2  -1   0 1057.19   45.60 
  -2  -1   0  975.10   46.40 
   2  -1   0 1034.20   46.10 
  -2  -1   0 1031.30   51.79 
  -2  -1   0 1040.00   49.40 
  -2  -1   0  999.20   45.40 
   2  -1   0 1025.70   39.90 
  -2  -1   0 1034.50   47.40 
  -2  -1   0  956.60   45.90 
  -2  -1   0 1032.80   33.10 
  -2  -1   0 1011.30   47.50 
   2  -1   0 1029.80   44.30 
  -2  -1   0 1117.29   48.90 
  -2  -1   0 1003.20   48.40 
  -2  -1   0 1119.29   48.40 
   2  -1   0 1036.50   45.20 
  -2  -1   0 1046.10   47.00 
  -2  -1   0  963.90   48.20 
  -2  -1   0  956.10   38.50 
  -2  -1   0 1019.30   48.70 
   2  -1   0  974.50   41.60 
  -2  -1   0  986.60   46.50 
   2  -1   0 1059.19   46.50 
   2  -1   0 1067.59   46.50 
   2  -1   0 1022.40   41.60 
   2  -1   0 1039.70   45.20 
   2  -1   0  989.90   46.70 
   2  -1   0 1030.40   42.30 
   2  -1   0 1046.30   38.70 
   2  -1   0  977.40   45.30 
   2  -1   0 1006.00   38.90 
  -2  -1   0 1024.70   46.80 
  -2  -1   0 1109.99   48.70 
  -2  -1   0  959.90   43.90 
  -2  -1   0 1059.39   52.19 
  -2  -1   0 1050.09   50.89 
  -2  -1   0 1090.29   48.30 
  -2  -1   0 1088.69   51.09 
   2  -1   0 1041.00   41.70 
   2  -1   0  956.60   46.20 
   2  -1   0 1001.10   39.00 
  -2  -1   0 1033.40   48.20 
   2  -1   0  962.50   46.20 
   2  -1   0  998.00   48.70 
  -2   1   0  973.40   40.20 
   2   1   0 1111.59   47.70 
   2   1   0 1036.80   48.50 
   2   1   0  998.70   49.60 
   2   1   0 1008.00   47.40 
  -2   1   0 1057.49   49.80 
  -2   1   0 1053.89   47.10 
   2   1   0 1065.39   48.10 
   2   1   0 1085.69   49.50 
   2   1   0  987.10   38.00 
   2   1   0  931.91   49.60 
   2   1   0 1042.20   47.90 
  -2   1   0 1048.80   38.30 
   2   1   0  962.70   48.70 
  -2   1   0 1026.10   47.10 
   2   1   0 1041.60   47.60 
   2   1   0 1016.40   46.20 
   2   1   0 1029.40   44.30 
  -2   1   0 1056.69   42.60 
  -2   1   0  975.00   47.10 
  -2   1   0  998.80   38.60 
  -2   1   0 1009.20   44.50 
  -2   1   0 1029.80   38.60 
  -2   1   0 1066.29   46.50 
  -2   1   0  960.60   44.60 
   2   1   0  952.00   47.20 
   2   1   0 1042.80   47.80 
  -2   1   0 1011.50   38.60 
   2   1   0 1041.90   51.19 
  -2   1   0 1049.99   46.80 
  -2   1   0  959.60   38.70 
   2   1   0  990.60   38.70 
   2   1   0  948.61   45.70 
  -2   1   0  980.30   42.00 
  -2   1   0 1062.39   44.70 
   2   1   0 1014.30   43.50 
  -2   1   0 1032.90   47.20 
   2   1   0 1014.70   44.10 
   2   1   0  970.90   47.10 
   2   1   0 1116.79   49.40 
  -2   1   0 1023.70   37.70 
  -2   1   0  955.70   40.60 
  -2   1   0 1006.40   38.60 
   2   1   0  929.11   41.40 
  -2   1   0  960.90   43.90 
  -2   1   0  989.40   43.90 
  -2   1   0 1073.69   47.10 
   2   1   0 1022.00   48.90 
   2   1   0 1039.30   37.50 
   2   1   0 1008.00   46.40 
  -3  -1   0  825.22   46.40 
  -3  -1   0  756.92   50.19 
  -3  -1   0  849.81   46.10 
   3  -1   0  769.32   38.20 
   3  -1   0  769.22   39.40 
   3  -1   0  762.02   40.40 
   3  -1   0  743.63   45.30 
   3  -1   0  802.92   49.20 
   3  -1   0  780.32   43.80 
   3  -1   0  827.22   39.70 
   3  -1   0  783.72   43.90 
  -3  -1   0  747.03   42.30 
   3  -1   0  779.42   31.50 
   3  -1   0  783.02   36.40 
   3  -1   0  697.23   45.20 
   3  -1   0  722.53   44.40 
  -3  -1   0  808.32   44.10 
   3  -1   0  832.62   45.10 
   3  -1   0  695.73   36.20 
   3  -1   0  776.22   44.60 
   3  -1   0  737.53   43.60 
  -3  -1   0  715.43   41.50 
  -3  -1   0  819.62   42.20 
  -3  -1   0  805.52   43.90 
  -3  -1   0  782.82   45.30 
   3  -1   0  758.12   46.50 
  -3  -1   0  782.32   43.30 
  -3  -1   0  800.52   47.70 
  -3  -1   0  800.12   50.09 
   3  -1   0  755.72   43.00 
  -3  -1   0  790.82   30.30 
  -3  -1   0  818.42   54.39 
  -3  -1   0  725.33   49.20 
  -3  -1   0  767.92   47.00 
  -3  -1   0  749.23   31.10 
  -3  -1   0  778.82   43.30 
   3  -1   0  767.02   31.80 
   3  -1   0  753.82   38.80 
   3  -1   0  776.72   46.30 
  -3  -1   0  754.02   43.20 
  -3  -1   0  785.42   29.90 
  -3  -1   0  759.92   45.70 
  -3  -1   0  766.52   52.99 
  -3  -1   0  755.32   40.40 
  -3   1   0  773.32   30.40 
   3   1   0  696.53   44.60 
  -3   1   0  751.92   40.30 
  -3   1   0  806.22   42.80 
  -3   1   0  773.22   36.60 
  -3   1   0  738.73   37.70 
   3   1   0  847.72   41.60 
  -3   1   0  777.12   34.50 
   3   1   0  777.52   47.50 
   3   1   0  772.42   27.20 
   3   1   0  772.92   43.00 
  -3   1   0  696.83   38.10 
   3   1   0  704.93   44.70 
   3   1   0  726.73   37.20 
   3   1   0  878.01   47.80 
   3   1   0  749.23   30.80 
  -3   1   0  789.82   44.20 
  -3   1   0  768.62   38.90 
  -3   1   0  805.12   33.50 
   3   1   0  781.32   29.40 
   3   1   0  688.63   41.90 
  -3   1   0  746.53   35.50 
   3   1   0  797.92   38.60 
   3   1   0  719.03   42.10 
   3   1   0  721.43   37.50 
  -3   1   0  776.42   34.60 
  -3   1   0  875.61   43.90 
  -3   1   0  784.72   37.20 
  -3   1   0  705.03   41.90 
  -3   1   0  763.22   44.10 
  -3   1   0  752.52   39.60 
  -3   1   0  794.32   45.10 
   3   1   0  692.53   45.80 
   3   1   0  740.63   47.00 
  -3   1   0  765.82   44.40 
   3   1   0  746.83   43.80 
  -3   1   0  707.03   43.90 
   3   1   0  785.92   30.60 
  -3   1   0  807.92   47.50 
  -3   1   0  770.92   32.40 
  -3   1   0  765.12   36.40 
  -3   1   0  759.32   30.80 
   3   1   0  711.13   44.60 
   3   1   0  836.32   44.80 
   3   1   0  731.73   43.60 
  -4  -1   0  335.17   38.80 
  -4  -1   0  382.46   46.50 
   4  -1   0  260.47   32.30 
  -4  -1   0  240.58   31.30 
  -4  -1   0  304.27   31.20 
  -4  -1   0  313.57   34.00 
  -4  -1   0  249.88   29.70 
  -4  -1   0  291.87   32.70 
   4  -1   0  323.87   31.90 
   4  -1   0  294.77   29.20 
   4  -1   0  275.27   33.60 
   4  -1   0  298.87   36.60 
   4  -1   0  271.67   27.50 
   4  -1   0  305.87   25.50 
   4  -1   0  340.17   38.80 
   4  -1   0  319.47   42.90 
   4  -1   0  297.07   35.50 
   4  -1   0  302.87   37.40 
   4  -1   0  259.57   34.20 
  -4  -1   0  303.87   19.30 
   4  -1   0  296.47   38.00 
  -4  -1   0  328.87   19.30 
  -4  -1   0  293.47   33.10 
  -4  -1   0  356.66   42.10 
   4  -1   0  264.67   33.80 
   4  -1   0  249.08   30.00 
  -4  -1   0  257.67   40.00 
   4  -1   0  363.46   44.50 
   4  -1   0  296.17   23.50 
  -4  -1   0  315.67   42.60 
   4  -1   0  253.27   34.70 
  -4   1   0  314.47   22.30 
   4   1   0  292.97   21.50 
   4   1   0  273.57   34.20 
  -4   1   0  283.97   30.70 
   4   1   0  366.86   42.60 
  -4   1   0  279.97   32.90 
  -4   1   0  268.57   14.30 
  -4   1   0  297.57   22.20 
  -4   1   0  289.57   29.40 
  -4   1   0  271.47   29.10 
  -4   1   0  339.27   34.70 
  -4   1   0  269.77   36.40 
  -4   1   0  303.37   32.00 
   4   1   0  204.98   32.10 
   4   1   0  283.77   34.40 
   4   1   0  271.37   34.80 
   4   1   0  309.17   32.30 
   4   1   0  318.07   39.40 
   4   1   0  292.17   33.40 
   4   1   0  380.56   45.60 
  -4   1   0  307.57   24.90 
  -4   1   0  294.77   37.30 
  -4   1   0  276.37   14.20 
  -4   1   0  283.97   18.40 
  -4   1   0  303.57   23.80 
   4   1   0  327.87   40.00 
  -4   1   0  314.67   42.00 
  -4   1   0  289.67   36.70 
  -4   1   0  287.87   17.60 
  -4   1   0  319.07   24.00 
   4   1   0  294.27   22.00 
   4   1   0  283.07   14.60 
   4   1   0  338.97   25.80 
   4   1   0  297.47   36.80 
   4   1   0  293.57   14.60 
   4   1   0  335.77   35.90 
   4   1   0  268.57   31.80 
   4   1   0  208.58   30.20 
   5  -1   0 2751.52  117.99 
   5  -1   0 2844.52  125.99 
   5  -1   0 2811.72  122.79 
   5  -1   0 2819.32  111.99 
  -5  -1   0 2858.41   97.89 
  -5  -1   0 2703.93  117.49 
   5  -1   0 2693.83  125.09 
   5  -1   0 2762.72  132.69 
   5  -1   0 2797.22  128.79 
   5  -1   0 2938.01  108.69 
   5  -1   0 2849.11  123.59 
   5  -1   0 2759.82  108.19 
   5  -1   0 2819.02  128.09 
  -5  -1   0 2786.22  133.79 
  -5  -1   0 2817.42  113.39 
  -5  -1   0 2665.43  127.39 
   5  -1   0 3031.00  132.59 
  -5  -1   0 2862.61  121.29 
  -5  -1   0 2770.92  120.59 
  -5  -1   0 2797.72  135.69 
  -5  -1   0 2833.62  116.89 
  -5  -1   0 2913.01   98.79 
  -5  -1   0 2846.62  127.39 
  -5  -1   0 2789.92  134.89 
   5  -1   0 2697.23  107.89 
   5  -1   0 2838.02  113.69 
  -5  -1   0 2718.83  117.59 
   5  -1   0 2820.72  122.89 
   5  -1   0 2829.02  130.39 
  -5  -1   0 2830.92   96.09 
  -5   1   0 2691.93  130.59 
  -5   1   0 3019.90  129.49 
  -5   1   0 2725.83  128.19 
  -5   1   0 2888.11  133.09 
   5   1   0 2886.81  122.59 
  -5   1   0 2863.81  104.29 
   5   1   0 2862.61  130.69 
  -5   1   0 2988.60  115.79 
   5   1   0 2792.82  124.89 
   5   1   0 2809.42  113.09 
  -5   1   0 2805.72   92.49 
  -5   1   0 2906.31  122.49 
  -5   1   0 2913.51  111.19 
   5   1   0 2945.51  107.49 
   5   1   0 2868.61  129.49 
   5   1   0 2895.71  127.69 
  -5   1   0 2707.63  110.19 
  -5   1   0 2839.92  103.29 
  -5   1   0 2811.92  107.19 
  -5   1   0 2711.03  119.29 
   5   1   0 2732.63  123.99 
   5   1   0 2877.61  120.49 
   5   1   0 2826.52   91.79 
  -5   1   0 2872.91  110.99 
  -5   1   0 2704.23  106.49 
   5   1   0 2921.01  132.79 
  -5   1   0 2709.23  112.89 
   5   1   0 2872.31  130.59 
  -5   1   0 2866.11   91.89 
   5   1   0 2776.22  127.69 
   5   1   0 2801.92  126.59 
   5   1   0 2934.61  120.39 
  -5   1   0 2814.82   93.59 
  -6  -1   0  233.38   40.00 
   6  -1   0  256.37   47.60 
   6  -1   0  229.38   39.00 
   6  -1   0  199.68   37.30 
  -6  -1   0  281.97   27.70 
  -6  -1   0  157.68   30.10 
  -6  -1   0  209.18   36.20 
  -6  -1   0  193.18   40.10 
  -6  -1   0  253.07   34.90 
  -6  -1   0  318.97   53.29 
   6  -1   0  232.18   42.40 
   6  -1   0  185.78   40.10 
   6  -1   0  170.08   36.40 
   6  -1   0  166.08   33.80 
   6  -1   0  176.78   38.90 
  -6  -1   0  186.58   32.30 
   6  -1   0  247.98   38.40 
   6  -1   0  205.18   30.70 
  -6  -1   0  182.18   37.30 
  -6  -1   0  250.47   24.60 
   6  -1   0  249.68   35.80 
  -6  -1   0  141.29   29.50 
  -6  -1   0  186.08   34.20 
  -6  -1   0  323.07   56.29 
   6  -1   0  250.57   32.10 
   6  -1   0  227.88   29.70 
   6  -1   0  286.17   33.80 
   6  -1   0  221.08   37.60 
  -6  -1   0  228.58   23.90 
   6   1   0  294.07   32.50 
   6   1   0  189.18   35.30 
   6   1   0  211.88   30.60 
  -6   1   0  246.18   27.90 
  -6   1   0  277.87   47.30 
   6   1   0  193.28   38.40 
   6   1   0  210.58   34.90 
  -6   1   0  236.78   32.50 
  -6   1   0  217.58   36.60 
   6   1   0  266.07   46.10 
  -6   1   0  237.48   20.60 
  -6   1   0  218.68   37.60 
  -6   1   0  216.98   32.60 
  -6   1   0  162.78   28.80 
   6   1   0  205.08   38.10 
   6   1   0  218.18   39.80 
   6   1   0  200.48   38.00 
   6   1   0  309.07   51.79 
   6   1   0  145.89   33.50 
  -6   1   0  274.47   50.69 
   6   1   0  307.67   46.90 
  -6   1   0  246.58   38.30 
  -6   1   0  228.98   33.10 
   6   1   0  249.08   37.40 
  -6   1   0  231.18   23.80 
   6   1   0  257.07   44.60 
  -6   1   0  226.08   29.30 
  -6   1   0  195.78   38.20 
   7  -1   0 2790.92  140.39 
  -7  -1   0 2800.72  154.78 
   7  -1   0 2624.44  144.59 
   7  -1   0 2659.23  123.89 
  -7  -1   0 2730.33  124.39 
   7  -1   0 2635.14  137.49 
  -7  -1   0 3059.69  157.28 
  -7  -1   0 2668.73  120.99 
  -7  -1   0 2703.03  145.49 
   7  -1   0 2785.82  124.69 
   7  -1   0 2690.03  145.09 
   7  -1   0 2793.02  140.69 
  -7  -1   0 2735.43  153.98 
   7  -1   0 2943.01  141.49 
  -7  -1   0 2550.44  135.69 
   7  -1   0 2834.02  115.89 
   7  -1   0 2738.93  117.69 
  -7  -1   0 2751.12  128.49 
   7  -1   0 2818.02  113.09 
  -7  -1   0 2827.02  129.19 
  -7  -1   0 2844.82  135.99 
   7  -1   0 2907.41  148.39 
   7  -1   0 2591.44  141.19 
   7  -1   0 2613.64  131.19 
  -7  -1   0 2699.83  132.59 
   7   1   0 2633.14  133.39 
  -7   1   0 2750.92  121.19 
  -7   1   0 2632.14  108.39 
   7   1   0 2881.71  120.29 
   7   1   0 2782.62  144.49 
  -7   1   0 2728.93  144.99 
   7   1   0 2752.12  128.89 
   7   1   0 2533.95  136.59 
  -7   1   0 2725.83  149.79 
  -7   1   0 2757.12  117.29 
  -7   1   0 2837.12  136.59 
   7   1   0 2774.22  141.89 
   7   1   0 2751.12  146.99 
  -7   1   0 3053.69  138.89 
  -7   1   0 2474.25  144.39 
  -7   1   0 2722.53  121.99 
  -7   1   0 2861.71  122.39 
   7   1   0 2659.23  130.49 
   7   1   0 2847.42  149.59 
   7   1   0 2788.92  145.59 
   7   1   0 2590.24  138.69 
   7   1   0 2767.32  108.19 
   7   1   0 2648.54  138.69 
  -7   1   0 2743.73  142.69 
  -7   1   0 2811.82  121.49 
  -8  -1   0  296.17   64.39 
  -8  -1   0  228.88   44.70 
   8  -1   0  252.77   40.90 
   8  -1   0  346.27   58.69 
   8  -1   0  324.57   59.59 
  -8  -1   0  225.68   49.40 
   8  -1   0  284.37   49.99 
  -8  -1   0  205.28   40.10 
  -8  -1   0  256.27   54.39 
  -8  -1   0  388.06   72.39 
  -8  -1   0  249.97   40.30 
   8  -1   0  353.26   60.09 
   8  -1   0  310.27   58.49 
   8  -1   0  339.47   56.19 
  -8  -1   0  255.57   47.60 
  -8  -1   0  361.36   51.89 
   8  -1   0  222.28   45.70 
  -8  -1   0  218.78   42.50 
   8  -1   0  245.18   48.40 
  -8  -1   0  277.57   50.99 
   8  -1   0  278.77   54.09 
  -8   1   0  262.07   47.70 
   8   1   0  249.58   44.20 
   8   1   0  358.46   60.29 
   8   1   0  206.38   46.90 
  -8   1   0  191.58   49.10 
   8   1   0  225.28   47.40 
   8   1   0  263.87   52.89 
   8   1   0  259.27   53.19 
   8   1   0  371.86   64.39 
  -8   1   0  190.48   32.80 
  -8   1   0  293.47   49.70 
  -8   1   0  298.37   42.70 
  -8   1   0  255.37   43.40 
  -8   1   0  290.17   49.99 
  -8   1   0  240.58   39.70 
  -8   1   0  261.97   51.59 
  -8   1   0  271.27   41.40 
  -8   1   0  306.17   64.69 
  -8   1   0  215.48   50.49 
   8   1   0  277.77   53.09 
   8   1   0  328.07   54.19 
   8   1   0  270.77   53.59 
   8   1   0  296.57   48.90 
  -8   1   0  228.38   50.99 
   9  -1   0 1334.27  130.89 
  -9  -1   0 1398.46   94.09 
  -9  -1   0 1317.97   98.99 
  -9  -1   0 1147.69   91.69 
   9  -1   0 1297.27  102.09 
   9  -1   0 1102.99  113.99 
  -9  -1   0 1123.59  123.89 
  -9  -1   0 1190.08  134.99 
   9  -1   0 1158.68  117.79 
  -9  -1   0 1264.67  114.89 
  -9  -1   0 1306.87  102.19 
   9  -1   0 1255.47  129.39 
  -9  -1   0 1178.18   86.59 
  -9  -1   0 1032.10  108.09 
   9  -1   0 1405.36  105.89 
   9  -1   0 1237.28  105.49 
   9  -1   0 1356.96   99.99 
  -9  -1   0 1429.16  112.29 
   9   1   0 1421.36  114.79 
   9   1   0 1488.85  116.99 
  -9   1   0 1169.78  104.19 
  -9   1   0 1234.98  109.29 
   9   1   0 1405.26  105.69 
   9   1   0 1306.67  104.19 
  -9   1   0 1359.76  102.49 
   9   1   0 1167.48   92.69 
   9   1   0 1231.58  125.09 
  -9   1   0 1212.48  110.49 
  -9   1   0 1335.07   98.79 
   9   1   0 1321.77  102.59 
   9   1   0 1233.38  103.59 
  -9   1   0 1205.38   95.69 
   9   1   0 1076.69   88.69 
  -9   1   0 1309.57  105.49 
   9   1   0 1306.37  130.89 
  -9   1   0 1044.30  122.49 
 -10  -1   0   63.09   32.70 
  10  -1   0   50.79   36.90 
  10  -1   0   59.59   36.90 
 -10  -1   0   62.49   35.30 
  10  -1   0   16.50   27.00 
  10  -1   0   73.89   37.40 
  10  -1   0   16.00   24.30 
  10  -1   0   74.99   39.00 
 -10  -1   0   35.40   29.20 
 -10  -1   0   70.19   36.90 
 -10  -1   0   61.59   40.60 
 -10  -1   0   32.10   28.10 
 -10  -1   0    7.40   25.80 
 -10  -1   0   17.20   33.30 
 -10  -1   0   25.40   32.40 
 -10   1   0   26.60   29.00 
  10   1   0   13.20   26.90 
 -10   1   0   44.50   34.00 
  10   1   0    8.30   24.70 
 -10   1   0   72.19   34.50 
 -10   1   0   49.90   35.00 
 -10   1   0   49.20   36.30 
  10   1   0   42.60   28.80 
 -10   1   0   46.90   28.50 
  10   1   0   48.00   30.40 
  10   1   0   37.40   30.80 
 -10   1   0   48.00   27.50 
 -10   1   0   32.30   34.20 
  10   1   0   64.99   34.40 
 -10   1   0   60.89   34.30 
  10   1   0   65.99   37.20 
   0  -2   0 4407.16  133.79 
   0  -2   0 4321.37  134.49 
   0  -2   0 4498.55  144.69 
   0  -2   0 4244.28  139.89 
   0  -2   0 4387.06  144.59 
   0  -2   0 4303.97  139.09 
   0  -2   0 4491.05  148.49 
   0  -2   0 4108.69  161.78 
   0  -2   0 4221.08  140.99 
   0  -2   0 4310.57  140.79 
   0  -2   0 4254.67  154.18 
   0  -2   0 4465.25  141.29 
   0  -2   0 4241.98  140.09 
   0  -2   0 4365.56  141.89 
   0  -2   0 4249.98  141.49 
   0  -2   0 4103.19  141.09 
   0  -2   0 4264.47  136.09 
   0   2   0 4285.87  138.99 
   0   2   0 4262.77  140.39 
   0   2   0 4299.37  137.59 
   0   2   0 4280.27  135.99 
   0   2   0 4378.16  137.59 
   0   2   0 4308.37  151.88 
   0   2   0 4368.26  143.69 
   0   2   0 4253.97  137.29 
   0   2   0 4348.17  140.59 
   0   2   0 4334.87  138.29 
   0   2   0 4321.17  142.19 
   0   2   0 4364.36  140.49 
   0   2   0 4339.57  139.99 
   0   2   0 4489.05  141.59 
   0   2   0 4405.06  142.99 
   0   2   0 4201.88  139.09 
   0   2   0 4294.57  136.19 
   0   2   0 4207.68  141.29 
   0   2   0 4358.66  133.99 
   0   2   0 4168.28  140.89 
   0   2   0 4279.07  133.89 
   0   2   0 4579.94  145.39 
  -1  -2   0 5909.41  192.38 
  -1  -2   0 5726.13  182.38 
  -1  -2   0 5904.61  182.58 
  -1  -2   0 5893.01  183.88 
  -1  -2   0 5952.00  178.38 
  -1  -2   0 6011.50  185.58 
   1  -2   0 5732.03  171.98 
  -1  -2   0 5722.93  173.48 
  -1  -2   0 5580.64  184.48 
   1  -2   0 5684.73  184.18 
  -1  -2   0 5851.01  181.88 
   1  -2   0 5793.82  179.28 
  -1  -2   0 5692.13  171.78 
   1  -2   0 5863.11  180.28 
   1  -2   0 5547.25  182.28 
   1  -2   0 5558.34  180.88 
   1  -2   0 5729.53  181.58 
   1  -2   0 5916.31  185.78 
   1  -2   0 5745.93  184.58 
  -1  -2   0 5740.13  185.98 
   1  -2   0 5618.64  179.38 
   1  -2   0 5732.93  185.18 
  -1  -2   0 5788.82  174.78 
  -1  -2   0 5721.63  182.28 
   1  -2   0 5589.64  174.48 
   1  -2   0 5775.22  165.08 
  -1  -2   0 5798.82  186.98 
  -1  -2   0 6028.00  187.48 
   1  -2   0 5603.54  183.58 
  -1  -2   0 5630.34  181.28 
  -1  -2   0 5734.43  186.08 
   1  -2   0 5934.71  185.18 
  -1  -2   0 5504.95  183.08 
  -1  -2   0 5803.52  188.28 
  -1  -2   0 5863.61  182.08 
  -1  -2   0 5898.71  182.78 
  -1  -2   0 6081.49  182.38 
  -1  -2   0 5921.31  183.48 
  -1  -2   0 5731.93  176.18 
   1   2   0 5777.52  175.78 
  -1   2   0 5767.92  182.18 
  -1   2   0 5662.53  176.18 
   1   2   0 5424.86  184.28 
   1   2   0 5707.23  185.78 
   1   2   0 5940.21  184.78 
   1   2   0 5833.52  177.38 
   1   2   0 5935.11  180.68 
   1   2   0 5809.12  183.88 
   1   2   0 5800.62  182.18 
   1   2   0 5672.23  183.28 
  -1   2   0 5751.92  179.68 
  -1   2   0 5890.61  188.38 
  -1   2   0 5749.12  180.28 
   1   2   0 6070.49  182.28 
   1   2   0 5615.94  183.88 
   1   2   0 5903.21  185.28 
  -1   2   0 5780.22  176.28 
   1   2   0 5701.93  180.58 
  -1   2   0 5127.89  185.68 
   1   2   0 5957.90  172.98 
  -1   2   0 5392.96  184.18 
   1   2   0 5905.21  187.98 
   1   2   0 5922.11  181.88 
  -1   2   0 5155.48  193.18 
  -1   2   0 5622.74  176.28 
  -1   2   0 5747.12  178.78 
  -1   2   0 5581.14  176.28 
  -1   2   0 5527.85  183.98 
  -1   2   0 5783.22  173.18 
  -1   2   0 5654.93  180.28 
   1   2   0 5705.73  181.58 
   1   2   0 5629.64  186.58 
   1   2   0 5677.43  174.58 
  -1   2   0 5587.24  175.98 
  -1   2   0 5578.34  179.78 
  -1   2   0 5588.14  179.48 
   1   2   0 5792.82  181.48 
  -1   2   0 5757.92  171.88 
  -1   2   0 5744.93  175.28 
  -1   2   0 5326.77  186.38 
   1   2   0 5791.42  183.28 
   1   2   0 5829.42  171.98 
   1   2   0 5822.82  182.28 
   1   2   0 5719.83  181.38 
  -1   2   0 5543.45  184.58 
  -1   2   0 5600.14  181.38 
   1   2   0 5834.02  186.58 
  -1   2   0 5608.14  183.18 
  -1   2   0 5769.02  182.28 
   1   2   0 6006.40  190.68 
   1   2   0 5741.93  186.58 
   1   2   0 5717.63  182.68 
  -1   2   0 5280.67  188.38 
  -2  -2   0 2836.42   99.29 
   2  -2   0 2658.83   95.49 
   2  -2   0 2765.22   96.79 
   2  -2   0 2615.44  101.29 
  -2  -2   0 2893.61  112.29 
   2  -2   0 2601.34   97.79 
   2  -2   0 2689.13   96.39 
  -2  -2   0 2691.13  103.89 
  -2  -2   0 2733.63   98.39 
  -2  -2   0 2816.62  102.79 
  -2  -2   0 2553.64  101.79 
   2  -2   0 2794.62  100.19 
  -2  -2   0 2826.92   96.29 
  -2  -2   0 2594.84  103.89 
  -2  -2   0 2831.42  105.59 
   2  -2   0 2676.13   99.29 
   2  -2   0 2695.83   97.59 
  -2  -2   0 2656.73  103.59 
  -2  -2   0 2796.92   95.99 
   2  -2   0 2709.83  102.59 
   2  -2   0 2708.63  103.19 
  -2  -2   0 2801.22  104.29 
  -2  -2   0 2691.33  105.19 
   2  -2   0 2728.63   97.59 
  -2  -2   0 2710.23  103.09 
  -2  -2   0 2723.73  104.69 
  -2  -2   0 2761.72   99.19 
  -2  -2   0 2674.33  102.19 
   2  -2   0 2751.12   98.39 
  -2  -2   0 2842.12  100.09 
  -2  -2   0 2837.02  106.59 
   2  -2   0 2733.63  102.29 
  -2  -2   0 2721.33  106.69 
   2  -2   0 2662.33   96.99 
  -2  -2   0 2756.52  106.59 
  -2  -2   0 2913.71  109.39 
  -2   2   0 2716.53  100.09 
   2   2   0 2673.53  105.19 
  -2   2   0 2716.13   97.59 
  -2   2   0 2775.52   96.99 
  -2   2   0 2676.23   97.59 
   2   2   0 2802.72  103.49 
   2   2   0 2742.73   98.79 
   2   2   0 2711.13  102.39 
  -2   2   0 2573.84   94.49 
   2   2   0 2724.73  103.29 
   2   2   0 2825.62  104.29 
  -2   2   0 2673.53   90.19 
  -2   2   0 2760.22   99.79 
   2   2   0 2656.33  108.09 
   2   2   0 2632.54   94.59 
  -2   2   0 2633.94   96.49 
  -2   2   0 2779.22   95.19 
   2   2   0 2846.02  103.69 
   2   2   0 2623.84  103.79 
   2   2   0 2783.12  106.69 
   2   2   0 2705.13   86.19 
  -2   2   0 2715.83  101.79 
  -2   2   0 2713.73  100.29 
  -2   2   0 2691.93   95.49 
   2   2   0 2729.53  103.79 
  -2   2   0 2649.63   97.09 
   2   2   0 2634.04   85.29 
   2   2   0 2674.43  102.99 
  -2   2   0 2784.52   94.69 
  -2   2   0 2734.33   99.49 
  -2   2   0 2526.35  101.79 
  -2   2   0 2755.82   97.79 
  -2   2   0 2778.52   97.99 
   2   2   0 2667.33  102.39 
  -2   2   0 2686.03   98.39 
   2   2   0 2707.33   95.99 
  -2   2   0 2817.42  103.29 
  -2   2   0 2594.54   93.89 
   2   2   0 2718.83  101.79 
   2   2   0 2819.52   99.99 
  -2   2   0 2711.03  103.79 
  -2   2   0 2708.13   99.89 
  -2   2   0 2817.62  101.29 
  -2   2   0 2579.44   96.49 
   2   2   0 2758.92   97.89 
  -2   2   0 2724.23   96.69 
   2   2   0 2742.53  106.79 
   2   2   0 2641.64  103.39 
   3  -2   0 1218.38   63.69 
  -3  -2   0 1131.49   51.39 
   3  -2   0 1096.09   59.19 
   3  -2   0 1198.98   58.79 
   3  -2   0 1054.09   60.79 
  -3  -2   0 1168.38   62.79 
  -3  -2   0 1076.59   60.39 
  -3  -2   0 1109.09   62.49 
   3  -2   0 1073.99   55.89 
   3  -2   0 1231.68   55.39 
   3  -2   0 1117.59   58.89 
   3  -2   0 1167.58   60.29 
   3  -2   0 1144.19   51.99 
  -3  -2   0 1267.37   62.69 
   3  -2   0 1119.89   58.89 
   3  -2   0 1258.47   61.19 
  -3  -2   0 1122.19   61.09 
   3  -2   0 1117.09   43.30 
  -3  -2   0 1251.57   62.09 
  -3  -2   0 1128.89   56.09 
   3  -2   0 1114.29   56.79 
  -3  -2   0 1222.38   63.89 
   3  -2   0 1163.08   51.59 
   3  -2   0 1252.67   59.09 
   3  -2   0 1098.99   51.49 
  -3  -2   0 1305.57   69.19 
  -3  -2   0 1147.29   56.69 
  -3  -2   0 1314.67   70.49 
   3  -2   0 1168.88   58.99 
   3  -2   0 1172.18   58.19 
  -3   2   0 1168.78   54.49 
  -3   2   0 1099.69   53.89 
  -3   2   0 1133.69   50.79 
  -3   2   0 1077.69   58.29 
  -3   2   0 1162.28   55.19 
  -3   2   0 1144.19   58.19 
   3   2   0 1275.77   63.39 
   3   2   0 1119.99   60.39 
  -3   2   0 1192.28   51.79 
   3   2   0 1135.69   62.59 
   3   2   0 1243.68   59.69 
   3   2   0 1155.48   61.59 
  -3   2   0 1047.20   59.89 
  -3   2   0 1121.79   51.69 
  -3   2   0 1121.09   57.49 
  -3   2   0 1169.18   53.39 
  -3   2   0 1083.59   59.09 
   3   2   0 1248.58   58.49 
   3   2   0 1177.68   62.09 
   3   2   0 1208.08   61.19 
   3   2   0 1136.49   62.89 
   3   2   0 1190.58   50.59 
   3   2   0 1269.97   64.89 
   3   2   0 1171.98   49.20 
  -3   2   0 1192.08   44.50 
   3   2   0 1073.49   63.19 
  -3   2   0 1190.08   47.30 
   3   2   0 1225.38   59.89 
  -3   2   0 1157.78   60.49 
  -3   2   0 1139.89   49.40 
   3   2   0 1222.08   60.69 
   3   2   0 1216.78   52.19 
  -3   2   0 1262.17   58.39 
  -3   2   0 1205.68   53.49 
   3   2   0 1171.18   57.99 
  -3   2   0 1147.09   50.19 
  -3   2   0 1191.58   43.10 
  -3   2   0 1163.08   57.19 
  -3   2   0 1130.99   56.29 
   4  -2   0  796.22   53.09 
  -4  -2   0  852.71   53.59 
   4  -2   0  875.21   44.30 
  -4  -2   0  835.92   41.70 
  -4  -2   0  828.02   53.39 
   4  -2   0  842.72   40.30 
  -4  -2   0  896.01   56.19 
  -4  -2   0  871.71   61.39 
   4  -2   0  867.71   52.39 
  -4  -2   0  856.21   57.99 
   4  -2   0  826.62   49.30 
  -4  -2   0  837.62   57.49 
  -4  -2   0  858.01   62.89 
   4  -2   0  839.62   52.29 
   4  -2   0  861.81   56.09 
   4  -2   0  875.21   42.70 
   4  -2   0  931.71   46.80 
   4  -2   0  832.72   41.10 
  -4  -2   0  876.41   52.19 
  -4  -2   0  780.52   60.29 
  -4  -2   0  843.02   54.79 
   4  -2   0  809.62   53.19 
   4  -2   0  878.61   53.39 
   4  -2   0  878.51   49.00 
   4  -2   0  800.52   54.89 
   4  -2   0  861.51   58.39 
   4  -2   0  894.31   59.69 
  -4  -2   0  948.31   57.59 
   4  -2   0  845.02   47.10 
   4  -2   0  868.21   53.19 
   4  -2   0  793.62   52.59 
   4  -2   0  815.62   54.59 
  -4   2   0  813.82   44.70 
  -4   2   0  854.01   40.50 
   4   2   0  895.41   55.69 
  -4   2   0  913.71   43.70 
  -4   2   0  797.52   38.90 
  -4   2   0  795.72   46.60 
  -4   2   0  802.92   39.70 
   4   2   0  888.81   57.19 
  -4   2   0  848.62   42.80 
   4   2   0  832.22   55.99 
   4   2   0  781.72   53.59 
  -4   2   0  831.92   39.40 
   4   2   0  780.12   47.70 
   4   2   0  920.01   39.60 
   4   2   0  893.01   56.39 
   4   2   0  870.91   56.59 
   4   2   0  858.91   41.50 
   4   2   0  858.61   36.50 
  -4   2   0  860.51   46.80 
   4   2   0  779.92   55.89 
  -4   2   0  835.62   38.90 
   4   2   0  800.92   56.59 
   4   2   0  754.12   53.59 
   4   2   0  849.41   48.30 
  -4   2   0  908.01   41.80 
  -4   2   0  877.11   55.79 
   4   2   0  852.41   54.09 
  -4   2   0  783.12   40.00 
   4   2   0  800.92   39.50 
   4   2   0  870.71   50.29 
   4   2   0  862.91   59.29 
  -4   2   0  861.91   48.10 
  -4   2   0  882.61   43.70 
  -4   2   0  824.82   44.60 
   4   2   0  852.71   50.29 
   5  -2   0  336.27   42.40 
   5  -2   0  335.47   42.20 
   5  -2   0  432.46   50.99 
   5  -2   0  326.57   27.10 
  -5  -2   0  318.27   39.80 
  -5  -2   0  460.65   59.39 
  -5  -2   0  435.76   48.90 
   5  -2   0  331.17   44.30 
   5  -2   0  309.37   37.30 
   5  -2   0  331.87   27.50 
   5  -2   0  328.47   36.80 
   5  -2   0  389.76   45.40 
   5  -2   0  391.96   53.09 
  -5  -2   0  417.16   57.99 
  -5  -2   0  267.67   37.30 
  -5  -2   0  404.56   46.90 
   5  -2   0  424.76   52.29 
  -5  -2   0  336.37   51.29 
   5  -2   0  326.27   46.60 
   5  -2   0  370.16   36.90 
  -5  -2   0  291.47   40.90 
  -5  -2   0  344.07   45.50 
   5  -2   0  359.26   45.70 
  -5  -2   0  380.06   44.90 
  -5  -2   0  273.57   39.20 
   5  -2   0  336.57   43.20 
   5  -2   0  278.27   37.10 
   5  -2   0  417.06   31.40 
   5  -2   0  338.87   45.10 
  -5   2   0  303.37   32.50 
   5   2   0  355.16   22.70 
  -5   2   0  330.87   23.60 
  -5   2   0  321.77   25.10 
  -5   2   0  372.36   37.40 
   5   2   0  337.87   47.20 
   5   2   0  365.36   49.50 
  -5   2   0  350.96   24.60 
   5   2   0  378.16   32.00 
   5   2   0  358.66   48.80 
   5   2   0  386.76   46.90 
  -5   2   0  382.06   28.90 
   5   2   0  377.66   46.60 
   5   2   0  374.46   48.70 
   5   2   0  345.87   20.90 
  -5   2   0  369.46   49.60 
  -5   2   0  317.17   31.60 
  -5   2   0  362.06   46.30 
  -5   2   0  337.87   47.40 
  -5   2   0  411.86   47.90 
  -5   2   0  306.87   22.00 
   5   2   0  352.46   44.00 
  -5   2   0  391.06   27.30 
  -5   2   0  382.06   44.10 
   5   2   0  294.17   34.30 
   5   2   0  321.47   37.50 
   5   2   0  362.86   23.70 
   5   2   0  337.77   46.90 
   5   2   0  319.37   34.70 
   5   2   0  417.56   49.00 
  -5   2   0  382.16   44.10 
  -5   2   0  342.47   41.20 
   5   2   0  315.67   43.00 
  -5   2   0  385.56   23.40 
  -5   2   0  381.96   27.30 
   5   2   0  308.87   42.40 
  -6  -2   0  301.87   41.80 
   6  -2   0  309.17   46.80 
   6  -2   0  390.06   38.30 
  -6  -2   0  335.07   51.79 
   6  -2   0  263.07   41.50 
   6  -2   0  333.17   49.50 
   6  -2   0  256.37   45.90 
   6  -2   0  292.27   44.80 
   6  -2   0  342.37   51.09 
   6  -2   0  240.48   40.70 
  -6  -2   0  264.37   44.80 
  -6  -2   0  437.76   68.19 
  -6  -2   0  261.97   39.40 
   6  -2   0  284.47   33.60 
  -6  -2   0  319.57   45.80 
   6  -2   0  458.65   44.10 
   6  -2   0  331.27   42.60 
  -6  -2   0  300.17   54.39 
  -6  -2   0  295.97   45.20 
   6  -2   0  359.36   48.00 
   6  -2   0  357.76   39.40 
   6  -2   0  386.16   43.20 
  -6  -2   0  360.56   47.60 
   6  -2   0  407.36   58.99 
  -6  -2   0  251.97   48.50 
   6  -2   0  363.16   51.49 
  -6  -2   0  357.76   45.70 
   6   2   0  313.07   46.90 
   6   2   0  280.07   45.50 
  -6   2   0  271.27   39.30 
   6   2   0  347.67   42.40 
   6   2   0  303.37   48.40 
   6   2   0  300.27   31.40 
  -6   2   0  261.87   44.70 
   6   2   0  320.77   37.40 
  -6   2   0  329.27   40.40 
   6   2   0  398.96   57.69 
  -6   2   0  355.86   45.40 
  -6   2   0  351.56   44.50 
  -6   2   0  312.77   31.70 
  -6   2   0  258.07   38.90 
  -6   2   0  370.56   42.80 
  -6   2   0  326.37   36.90 
  -6   2   0  271.17   48.30 
   6   2   0  342.27   47.30 
  -6   2   0  342.37   25.90 
   6   2   0  269.07   44.20 
  -6   2   0  309.87   48.10 
   6   2   0  274.87   42.70 
   6   2   0  287.07   44.40 
   6   2   0  314.97   46.30 
  -6   2   0  335.17   25.00 
   6   2   0  356.86   35.90 
   6   2   0  318.17   49.90 
  -6   2   0  360.06   54.09 
  -6   2   0  372.46   38.70 
  -6   2   0  369.36   41.40 
   6   2   0  305.07   46.20 
   7  -2   0    4.60   15.30 
   7  -2   0    6.30   17.60 
  -7  -2   0    8.40   16.20 
   7  -2   0   13.70   13.50 
   7  -2   0   -7.60   10.70 
  -7  -2   0   -5.50   14.20 
   7  -2   0   29.40   23.70 
  -7  -2   0   20.90   22.70 
  -7  -2   0   13.30   15.20 
   7  -2   0   -0.50    9.70 
  -7  -2   0   25.00   17.10 
  -7  -2   0    7.30   17.00 
   7  -2   0   14.00   17.70 
  -7  -2   0    4.10   20.20 
  -7  -2   0    9.00   15.80 
  -7  -2   0    7.60   14.20 
  -7  -2   0  -13.50   10.90 
   7  -2   0   10.10   11.80 
   7  -2   0    9.00   14.70 
   7  -2   0   14.70   18.60 
   7  -2   0   14.30   20.10 
   7  -2   0   16.60   17.70 
  -7  -2   0    1.70   12.30 
   7  -2   0    5.80   14.50 
   7   2   0   19.30   14.60 
   7   2   0   20.90   16.60 
   7   2   0   -3.60   14.10 
  -7   2   0   10.40   11.80 
   7   2   0    4.80   17.20 
   7   2   0    8.00   15.10 
  -7   2   0    3.20   14.30 
  -7   2   0    4.00   17.50 
   7   2   0    4.70   14.40 
   7   2   0   -0.60   14.40 
  -7   2   0    0.30   10.00 
   7   2   0  -12.90   11.20 
   7   2   0   21.30   15.60 
   7   2   0   16.00   12.40 
  -7   2   0   10.80   13.40 
  -7   2   0   22.20   17.10 
  -7   2   0   21.00   15.70 
  -7   2   0   17.10   12.80 
   7   2   0   -9.70   11.50 
  -7   2   0   21.80   18.40 
  -7   2   0   15.80   16.90 
   7   2   0    1.50   14.80 
  -7   2   0   27.60   17.20 
  -7   2   0   -6.80   14.40 
   7   2   0   10.40   16.30 
  -7   2   0   -6.20   11.20 
  -7   2   0   -3.50    9.10 
   8  -2   0   88.79   31.40 
  -8  -2   0   57.19   24.00 
  -8  -2   0   73.29   30.10 
   8  -2   0   82.99   32.70 
  -8  -2   0   33.30   21.10 
  -8  -2   0   66.09   27.40 
  -8  -2   0   97.19   36.10 
   8  -2   0   81.99   35.30 
   8  -2   0   90.49   31.30 
   8  -2   0   80.39   31.70 
  -8  -2   0   97.99   27.70 
   8  -2   0   98.49   32.50 
  -8  -2   0   65.19   36.60 
   8  -2   0   85.09   31.30 
  -8  -2   0  106.59   43.10 
  -8  -2   0   56.19   32.10 
  -8  -2   0   51.99   25.50 
  -8  -2   0  126.49   31.40 
   8  -2   0   54.19   26.70 
  -8  -2   0   74.99   31.20 
  -8   2   0   50.79   30.00 
  -8   2   0   64.19   33.10 
  -8   2   0   74.79   30.00 
  -8   2   0   59.89   27.00 
  -8   2   0   76.79   25.20 
   8   2   0   53.09   25.70 
   8   2   0   56.69   31.50 
  -8   2   0   37.70   21.00 
   8   2   0  107.29   32.70 
   8   2   0  124.29   38.50 
   8   2   0   36.50   25.60 
   8   2   0   57.49   27.30 
   8   2   0   55.89   27.30 
  -8   2   0   51.59   23.40 
   8   2   0  114.59   39.00 
  -8   2   0   47.60   27.50 
  -8   2   0   77.49   27.40 
   8   2   0   63.39   28.50 
  -8   2   0   71.19   29.10 
  -8   2   0  146.19   43.60 
   8   2   0  106.09   37.50 
   8   2   0   50.59   29.60 
  -9  -2   0    4.00   19.40 
  -9  -2   0   -2.20   21.70 
  -9  -2   0    9.60   21.10 
  -9  -2   0  -18.50   15.80 
  -9  -2   0   -1.90   22.60 
   9  -2   0  -30.10   15.10 
  -9  -2   0   -5.30   15.00 
  -9  -2   0   -8.40   15.30 
   9  -2   0  -17.70   15.70 
   9  -2   0   14.40   22.60 
  -9  -2   0   26.60   26.40 
  -9  -2   0   12.70   24.60 
   9  -2   0  -17.70   18.60 
   9  -2   0   -8.70   21.20 
   9  -2   0   15.60   22.80 
  -9  -2   0    1.30   17.00 
   9   2   0   -9.50   20.50 
   9   2   0   19.90   20.50 
  -9   2   0   -3.30   16.70 
   9   2   0    0.10   19.40 
  -9   2   0    5.40   22.40 
  -9   2   0   -5.30   17.20 
   9   2   0   14.60   20.70 
  -9   2   0   15.50   18.60 
  -9   2   0   13.90   25.80 
   9   2   0  -12.50   17.10 
   9   2   0   -0.70   21.40 
  -9   2   0   -7.70   19.20 
   9   2   0  -16.70   17.60 
  -9   2   0  -13.10   21.50 
  -9   2   0   31.30   28.50 
  -9   2   0   23.80   25.70 
   9   2   0   -5.40   20.10 
   9   2   0   -2.80   21.50 
  -9   2   0    9.50   24.60 
   9   2   0   -1.40   22.50 
  -9   2   0    7.40   16.40 
   9   2   0    7.90   22.80 
 -10  -2   0    0.80   23.40 
 -10  -2   0   17.30   30.80 
  10  -2   0   10.40   26.90 
 -10  -2   0  -13.40   19.90 
  10  -2   0   37.40   35.10 
 -10  -2   0  -33.60   24.40 
 -10  -2   0   53.59   34.70 
 -10  -2   0   -3.80   24.10 
  10  -2   0   38.60   28.10 
  10  -2   0   12.60   26.70 
 -10  -2   0   19.70   21.10 
 -10  -2   0   24.20   29.00 
  10  -2   0   34.90   30.40 
  10  -2   0  -16.60   26.50 
 -10  -2   0   55.29   32.50 
 -10  -2   0   11.60   34.60 
  10   2   0   21.30   34.90 
 -10   2   0   30.40   33.60 
  10   2   0   42.50   28.40 
  10   2   0   13.50   28.50 
  10   2   0   -4.30   21.00 
  10   2   0  -36.20   19.90 
  10   2   0   -5.50   21.30 
 -10   2   0   20.60   25.70 
 -10   2   0   42.70   32.30 
 -10   2   0   22.80   34.40 
 -10   2   0   -8.80   27.20 
 -10   2   0   26.00   28.90 
 -10   2   0  -16.30   22.00 
  10   2   0   33.20   26.10 
 -10   2   0   29.50   27.60 
 -10   2   0    3.70   23.80 
  10   2   0   31.10   27.60 
 -10   2   0   22.70   32.00 
   0  -3   0   -2.20    6.50 
   0  -3   0   -3.80    5.50 
   0  -3   0   -3.60    5.90 
   0  -3   0    0.00    5.60 
   0  -3   0    5.00    5.40 
   0  -3   0    5.80   14.80 
   0  -3   0   10.50    6.40 
   0  -3   0    4.30   14.70 
   0  -3   0   -3.80    6.30 
   0  -3   0    5.20    6.70 
   0  -3   0   17.50   14.20 
   0  -3   0   -3.40    6.10 
   0  -3   0    2.80    6.90 
   0  -3   0    6.90   10.50 
   0  -3   0    7.90    8.50 
   0  -3   0    0.00    3.90 
   0  -3   0    5.10   11.40 
   0  -3   0   -0.80    9.60 
   0  -3   0   -2.30    5.30 
   0  -3   0    7.90    6.90 
   0  -3   0   12.30    6.90 
   0  -3   0    0.20    4.80 
   0   3   0    4.20    5.70 
   0   3   0    7.30    6.50 
   0   3   0    1.50    6.10 
   0   3   0    1.10    7.10 
   0   3   0    1.60    5.30 
   0   3   0    6.40    7.40 
   0   3   0    1.40    7.20 
   0   3   0   -3.40    4.30 
   0   3   0    0.10    6.70 
   0   3   0   -1.00    2.50 
   0   3   0   -2.60    5.50 
   0   3   0   -1.40    6.50 
   0   3   0    9.50    7.40 
   0   3   0    5.80    6.10 
   0   3   0    0.80    6.30 
   0   3   0    6.60    7.10 
   0   3   0   -1.30    7.00 
   0   3   0   -1.60    5.10 
   0   3   0    4.80    6.90 
   0   3   0    2.50    5.50 
   0   3   0   -4.80    4.40 
   0   3   0    4.10    5.00 
   0   3   0   -1.20    6.30 
  -1  -3   0  389.46   31.60 
  -1  -3   0  402.26   33.70 
  -1  -3   0  370.86   21.40 
  -1  -3   0  362.36   27.80 
   1  -3   0  350.86   21.10 
  -1  -3   0  345.47   27.30 
  -1  -3   0  365.06   35.60 
   1  -3   0  361.96   29.60 
   1  -3   0  342.77   20.00 
   1  -3   0  403.26   28.50 
   1  -3   0  367.36   30.10 
   1  -3   0  343.87   25.90 
   1  -3   0  360.76   29.80 
   1  -3   0  372.86   31.40 
   1  -3   0  317.07   34.90 
   1  -3   0  386.36   43.80 
  -1  -3   0  367.36   28.50 
  -1  -3   0  362.86   29.70 
  -1  -3   0  387.46   31.00 
   1  -3   0  381.56   21.50 
  -1  -3   0  367.16   23.30 
  -1  -3   0  392.46   31.30 
  -1  -3   0  395.16   34.10 
  -1  -3   0  361.36   28.00 
  -1  -3   0  285.17   31.10 
  -1  -3   0  358.06   28.40 
  -1  -3   0  250.27   35.20 
  -1  -3   0  324.37   26.20 
   1  -3   0  382.06   44.10 
  -1  -3   0  378.66   25.80 
   1  -3   0  435.66   32.20 
  -1  -3   0  319.37   32.70 
   1  -3   0  359.46   17.90 
  -1  -3   0  362.56   29.30 
  -1  -3   0  370.16   29.80 
   1  -3   0  402.16   31.30 
  -1  -3   0  399.86   29.30 
   1  -3   0  353.66   34.10 
   1  -3   0  360.06   28.70 
  -1  -3   0  362.16   18.00 
   1  -3   0  389.56   31.70 
   1   3   0  373.76   38.40 
   1   3   0  335.17   25.10 
   1   3   0  423.66   31.20 
  -1   3   0  329.37   25.40 
   1   3   0  410.56   32.30 
   1   3   0  337.57   25.80 
  -1   3   0  381.16   28.30 
  -1   3   0  316.17   20.90 
  -1   3   0  380.16   18.00 
  -1   3   0  341.17   17.50 
   1   3   0  326.17   26.00 
  -1   3   0  328.77   34.90 
  -1   3   0  383.66   44.30 
   1   3   0  343.17   20.50 
  -1   3   0  430.96   29.90 
   1   3   0  343.57   28.00 
   1   3   0  363.96   18.10 
  -1   3   0  374.76   30.60 
  -1   3   0  330.57   23.80 
   1   3   0  396.16   38.60 
  -1   3   0  315.67   23.80 
   1   3   0  353.16   28.10 
   1   3   0  295.47   33.00 
   1   3   0  418.06   43.40 
  -1   3   0  379.66   30.80 
  -1   3   0  371.66   25.90 
   1   3   0  376.46   20.30 
   1   3   0  323.47   28.10 
   1   3   0  293.87   33.40 
   1   3   0  340.47   26.80 
  -1   3   0  391.66   26.30 
  -1   3   0  314.77   25.70 
  -1   3   0  357.36   19.30 
  -1   3   0  350.86   29.20 
  -1   3   0  368.66   44.70 
   1   3   0  391.56   30.50 
  -1   3   0  414.96   46.80 
  -1   3   0  380.36   27.00 
   1   3   0  370.06   26.30 
   1   3   0  360.76   29.50 
   1   3   0  361.66   27.50 
  -1   3   0  362.16   27.20 
   1   3   0  353.46   23.40 
  -1   3   0  393.06   31.30 
   1   3   0  365.36   27.60 
   1   3   0  380.66   28.30 
  -1   3   0  370.66   40.50 
  -1   3   0  303.07   25.40 
  -1   3   0  316.67   44.70 
   1   3   0  317.97   34.10 
   2  -3   0  477.15   35.60 
  -2  -3   0  407.46   26.00 
  -2  -3   0  454.75   30.10 
   2  -3   0  411.36   35.80 
  -2  -3   0  444.96   36.00 
  -2  -3   0  422.06   33.60 
   2  -3   0  431.46   42.80 
  -2  -3   0  439.76   35.30 
   2  -3   0  432.66   29.40 
   2  -3   0  406.06   26.90 
  -2  -3   0  427.26   35.80 
   2  -3   0  455.05   47.20 
  -2  -3   0  396.26   40.00 
  -2  -3   0  438.26   34.40 
  -2  -3   0  442.06   38.00 
   2  -3   0  472.75   34.30 
  -2  -3   0  437.66   49.20 
  -2  -3   0  398.16   31.10 
  -2  -3   0  469.25   38.10 
  -2  -3   0  432.86   38.10 
   2  -3   0  454.25   31.00 
   2  -3   0  409.76   31.70 
   2  -3   0  396.16   31.80 
  -2  -3   0  465.75   35.30 
   2  -3   0  504.05   34.70 
   2  -3   0  513.55   36.30 
  -2  -3   0  368.46   37.60 
  -2  -3   0  436.06   34.40 
  -2  -3   0  476.45   32.40 
   2  -3   0  379.56   27.80 
  -2  -3   0  463.95   28.50 
  -2  -3   0  394.56   29.00 
  -2   3   0  414.36   26.30 
   2   3   0  453.25   37.80 
  -2   3   0  428.16   30.90 
   2   3   0  496.95   37.10 
   2   3   0  410.36   40.40 
  -2   3   0  426.86   42.00 
  -2   3   0  457.55   26.50 
  -2   3   0  429.06   33.40 
  -2   3   0  448.36   49.30 
  -2   3   0  415.16   27.00 
  -2   3   0  481.25   49.80 
  -2   3   0  377.86   30.00 
  -2   3   0  454.45   37.20 
   2   3   0  384.86   31.70 
   2   3   0  436.56   27.20 
  -2   3   0  456.35   28.20 
  -2   3   0  427.36   33.20 
  -2   3   0  343.77   35.80 
   2   3   0  421.46   35.80 
  -2   3   0  411.46   28.70 
   2   3   0  409.86   42.50 
   2   3   0  433.16   33.80 
   2   3   0  364.46   38.40 
   2   3   0  375.56   27.50 
   2   3   0  378.56   25.70 
  -2   3   0  388.06   42.80 
  -2   3   0  387.16   30.60 
  -2   3   0  423.46   29.30 
  -2   3   0  467.45   39.10 
   2   3   0  439.46   30.50 
   2   3   0  438.16   33.40 
  -2   3   0  499.75   35.50 
  -2   3   0  472.15   32.90 
  -2   3   0  455.25   30.20 
  -2   3   0  443.06   32.00 
  -2   3   0  395.06   25.80 
   2   3   0  459.55   35.30 
   2   3   0  427.26   44.20 
   2   3   0  381.36   32.20 
   2   3   0  445.06   26.30 
  -2   3   0  450.75   28.80 
  -2   3   0  387.26   29.70 
  -2   3   0  384.96   29.30 
  -2   3   0  429.46   28.90 
   3  -3   0   29.40   13.30 
   3  -3   0   40.60   15.10 
  -3  -3   0   41.10   19.20 
  -3  -3   0   23.50   10.70 
  -3  -3   0   45.00   17.10 
  -3  -3   0   22.10   10.60 
   3  -3   0   36.50   12.70 
  -3  -3   0   40.00   16.50 
  -3  -3   0   27.40   13.90 
  -3  -3   0   28.10   11.40 
  -3  -3   0   62.29   17.90 
  -3  -3   0   43.30   16.10 
  -3  -3   0   23.00   12.90 
   3  -3   0   29.00   11.10 
  -3  -3   0   76.79   23.40 
   3  -3   0   37.50   14.60 
   3  -3   0   32.50   12.30 
  -3  -3   0   16.80   12.10 
   3  -3   0   31.50   12.00 
  -3  -3   0   21.70   12.70 
   3  -3   0   36.50   12.70 
   3  -3   0   40.30   14.50 
   3  -3   0   42.20   13.30 
  -3   3   0   47.60   13.50 
  -3   3   0   32.80   12.30 
   3   3   0   35.80   15.00 
   3   3   0   61.49   18.40 
  -3   3   0   39.20   13.00 
  -3   3   0   39.60   10.40 
  -3   3   0   27.20   11.60 
   3   3   0   35.40   14.30 
  -3   3   0   27.30   12.90 
  -3   3   0   38.40   10.80 
  -3   3   0   35.50   13.50 
   3   3   0   51.59   17.00 
   3   3   0   31.30   14.40 
   3   3   0   48.20   13.60 
   3   3   0   52.09   18.40 
   3   3   0   45.90    8.40 
   3   3   0   50.59    9.70 
  -3   3   0   37.80   12.20 
  -3   3   0   36.40   12.90 
  -3   3   0   42.80   12.60 
   3   3   0   30.80   11.70 
   3   3   0   53.19   18.70 
  -3   3   0   26.20   10.90 
   3   3   0   37.20   13.00 
  -3   3   0   54.49   13.70 
  -3   3   0   42.20   15.80 
   3   3   0   35.70   12.20 
  -3   3   0   39.30   13.30 
   3   3   0   39.90   15.10 
  -3   3   0   47.80   10.00 
   3   3   0   22.20   13.10 
  -3   3   0   25.20   15.30 
  -3   3   0   30.90   11.40 
   3   3   0   21.60   11.30 
  -3   3   0   37.20   13.00 
  -4  -3   0 1388.86   81.29 
   4  -3   0 1331.97   71.49 
  -4  -3   0 1474.65   81.79 
   4  -3   0 1373.96   73.89 
   4  -3   0 1410.96   64.89 
   4  -3   0 1435.66   73.29 
  -4  -3   0 1493.95   72.79 
   4  -3   0 1431.16   79.39 
   4  -3   0 1382.26   67.89 
  -4  -3   0 1431.16   79.99 
   4  -3   0 1498.15   78.69 
  -4  -3   0 1535.35   69.59 
  -4  -3   0 1549.54   82.49 
  -4  -3   0 1377.46   87.59 
   4  -3   0 1399.46   75.09 
  -4  -3   0 1484.05   80.89 
  -4  -3   0 1369.56   83.09 
   4  -3   0 1368.36   73.29 
   4  -3   0 1414.66   75.69 
  -4  -3   0 1508.85   88.49 
   4  -3   0 1397.36   65.99 
  -4  -3   0 1394.26   78.89 
  -4  -3   0 1432.76   78.39 
  -4   3   0 1511.75   67.49 
   4   3   0 1298.77   74.19 
  -4   3   0 1389.56   51.19 
   4   3   0 1347.97   78.69 
  -4   3   0 1367.06   67.89 
   4   3   0 1494.95   83.09 
  -4   3   0 1378.56   77.89 
  -4   3   0 1368.16   68.59 
  -4   3   0 1269.47   62.89 
  -4   3   0 1376.36   71.29 
   4   3   0 1339.87   74.69 
  -4   3   0 1336.37   77.29 
   4   3   0 1290.57   76.59 
   4   3   0 1523.55   81.69 
   4   3   0 1374.46   66.69 
   4   3   0 1333.07   74.79 
   4   3   0 1346.17   72.79 
   4   3   0 1312.27   71.49 
  -4   3   0 1604.04   84.19 
   4   3   0 1452.75   65.99 
   4   3   0 1384.16   61.49 
   4   3   0 1426.06   84.19 
   4   3   0 1265.57   77.29 
  -4   3   0 1297.57   65.29 
  -4   3   0 1358.86   57.39 
  -4   3   0 1360.46   64.99 
  -4   3   0 1440.66   74.29 
   4   3   0 1480.15   82.69 
  -4   3   0 1468.65   61.29 
   4   3   0 1325.37   76.89 
  -4   3   0 1432.46   74.89 
  -5  -3   0  805.52   61.49 
   5  -3   0  750.72   53.99 
   5  -3   0  657.13   46.90 
   5  -3   0  698.83   52.69 
   5  -3   0  678.53   52.29 
  -5  -3   0  719.43   58.09 
   5  -3   0  676.03   43.30 
   5  -3   0  776.82   58.09 
  -5  -3   0  714.03   52.69 
  -5  -3   0  748.83   64.79 
   5  -3   0  691.13   56.99 
  -5  -3   0  631.44   54.79 
   5  -3   0  706.53   44.40 
  -5  -3   0  527.25   64.89 
   5  -3   0  694.03   53.89 
  -5  -3   0  761.32   57.69 
  -5  -3   0  751.92   60.79 
  -5  -3   0  715.63   71.99 
   5  -3   0  698.23   53.49 
   5  -3   0  687.03   54.29 
   5  -3   0  696.13   56.49 
   5  -3   0  531.05   61.79 
  -5  -3   0  596.54   71.59 
  -5  -3   0  713.93   57.39 
   5  -3   0  739.33   62.29 
   5   3   0  687.13   52.09 
  -5   3   0  731.43   60.89 
  -5   3   0  727.13   38.00 
  -5   3   0  711.73   45.40 
  -5   3   0  672.73   36.70 
  -5   3   0  740.23   60.09 
  -5   3   0  744.33   53.09 
  -5   3   0  783.72   48.00 
   5   3   0  687.53   56.69 
  -5   3   0  703.43   42.60 
   5   3   0  622.64   65.99 
  -5   3   0  708.33   42.60 
  -5   3   0  731.63   36.60 
  -5   3   0  671.93   51.49 
   5   3   0  748.43   44.40 
   5   3   0  682.73   56.29 
   5   3   0  770.22   52.39 
   5   3   0  586.64   61.49 
  -5   3   0  756.02   45.70 
  -5   3   0  738.43   42.50 
   5   3   0  596.74   63.99 
  -5   3   0  751.52   35.50 
  -5   3   0  564.24   63.19 
   5   3   0  661.43   51.59 
   5   3   0  627.64   65.39 
  -5   3   0  804.52   57.99 
   5   3   0  684.23   37.30 
  -5   3   0  710.33   37.50 
   5   3   0  780.42   61.59 
   5   3   0  687.53   41.00 
   5   3   0  651.23   71.59 
  -5   3   0  740.43   55.79 
  -5   3   0  604.34   51.79 
   5   3   0  616.44   65.19 
  -5   3   0  627.14   54.69 
  -5   3   0  723.03   41.70 
   5   3   0  777.72   58.39 
   5   3   0  671.03   52.59 
  -6  -3   0 2815.82  128.69 
  -6  -3   0 2667.43  147.19 
   6  -3   0 2477.75  127.49 
  -6  -3   0 2670.63  145.79 
   6  -3   0 2626.84  138.39 
   6  -3   0 2850.01  130.39 
   6  -3   0 2701.03  133.69 
  -6  -3   0 2645.44  137.39 
  -6  -3   0 2842.52  132.99 
   6  -3   0 2602.84  124.19 
   6  -3   0 2524.55  138.09 
  -6  -3   0 2585.04  131.69 
  -6  -3   0 2687.93  139.29 
  -6  -3   0 2623.94  131.59 
   6  -3   0 2580.64  133.49 
   6  -3   0 2687.83  133.79 
  -6  -3   0 2688.23  134.59 
   6  -3   0 2639.34  128.49 
   6  -3   0 2648.83  134.69 
   6  -3   0 2642.94  127.69 
  -6  -3   0 2724.43  131.29 
   6  -3   0 2689.93  131.49 
   6  -3   0 2640.54  115.49 
  -6  -3   0 2854.31  151.58 
  -6   3   0 2559.84  106.99 
  -6   3   0 2592.14   99.59 
  -6   3   0 2764.62  131.89 
  -6   3   0 2658.93  137.69 
  -6   3   0 2572.54  128.49 
   6   3   0 2709.93  135.39 
   6   3   0 2640.14  140.89 
  -6   3   0 2642.14  109.09 
   6   3   0 2592.64  122.59 
   6   3   0 2674.43  134.49 
   6   3   0 2609.14  138.29 
   6   3   0 2664.33   89.99 
   6   3   0 2854.11  137.79 
  -6   3   0 2733.03   94.89 
  -6   3   0 2767.52  135.69 
   6   3   0 2627.94  133.09 
  -6   3   0 2714.53   99.69 
  -6   3   0 2741.83  115.29 
  -6   3   0 2596.24  127.29 
  -6   3   0 2650.63  124.29 
  -6   3   0 2633.14  130.29 
  -6   3   0 2588.74  124.89 
  -6   3   0 2693.13  138.99 
   6   3   0 2683.13  139.09 
   6   3   0 2684.93  100.69 
  -6   3   0 2522.05  133.09 
  -6   3   0 2872.51  127.19 
  -6   3   0 2831.62  129.89 
  -6   3   0 2883.71  136.39 
   6   3   0 2656.23  118.69 
   6   3   0 2604.74  134.19 
   6   3   0 2742.13  130.99 
   6   3   0 2564.04  115.79 
   6   3   0 2851.11  138.39 
  -6   3   0 2687.63  101.19 
  -6   3   0 2630.64  135.69 
   6   3   0 2603.94  132.59 
  -7  -3   0  674.73   73.99 
   7  -3   0  779.52   82.79 
  -7  -3   0  899.31   89.09 
   7  -3   0  680.23   76.69 
  -7  -3   0  665.43   78.99 
  -7  -3   0  877.41   92.39 
   7  -3   0  734.43   81.89 
   7  -3   0  727.93   85.69 
  -7  -3   0  765.52   77.09 
   7  -3   0  647.44   79.69 
   7  -3   0  727.73   88.09 
  -7  -3   0  941.41   70.29 
  -7  -3   0  685.13   91.09 
  -7  -3   0  873.01  101.39 
  -7  -3   0  828.42   69.19 
   7  -3   0  609.44   70.99 
   7  -3   0  624.34   78.19 
  -7  -3   0  763.22   65.99 
   7  -3   0  631.94   76.59 
  -7  -3   0  717.83   76.49 
   7  -3   0  661.83   76.29 
  -7  -3   0  901.71  103.99 
  -7   3   0  754.62   81.59 
  -7   3   0  719.83   75.29 
  -7   3   0  511.55   71.99 
   7   3   0  600.44   76.29 
  -7   3   0  734.43   78.29 
   7   3   0  822.52   76.69 
  -7   3   0  755.62   75.69 
  -7   3   0  763.62   76.29 
   7   3   0  676.73   79.79 
   7   3   0  826.22   84.19 
   7   3   0  993.10  104.39 
   7   3   0  811.12   87.69 
  -7   3   0  874.21   95.19 
  -7   3   0  809.72   86.59 
  -7   3   0  837.32   89.09 
   7   3   0  843.62   85.09 
   7   3   0  517.15   71.89 
   7   3   0  823.72   91.49 
  -7   3   0  759.62   50.39 
  -7   3   0  716.83   85.89 
  -7   3   0  684.63   78.49 
   7   3   0  779.62   53.19 
   7   3   0  733.03   82.59 
  -7   3   0  669.93   69.89 
  -7   3   0  777.72   89.39 
   7   3   0  732.53   60.19 
  -7   3   0  779.22   65.89 
  -7   3   0  823.22   99.19 
   7   3   0  789.22   86.59 
   7   3   0  796.22   83.99 
   8  -3   0 1190.08   96.69 
  -8  -3   0 1173.38   87.89 
   8  -3   0 1284.77  104.89 
  -8  -3   0 1012.00   83.69 
  -8  -3   0  917.41  100.89 
   8  -3   0  953.90   83.09 
  -8  -3   0 1041.70   86.49 
   8  -3   0 1015.10  106.79 
  -8  -3   0 1158.38  135.19 
  -8  -3   0 1197.68  105.29 
  -8  -3   0  960.20   96.09 
  -8  -3   0 1222.48  131.19 
  -8  -3   0 1037.00  109.29 
   8  -3   0 1176.08  113.29 
  -8  -3   0 1128.69   88.29 
   8  -3   0  964.20   99.29 
  -8  -3   0 1173.88   88.89 
   8   3   0  905.31  103.89 
  -8   3   0 1131.09   95.79 
  -8   3   0 1218.88   95.09 
  -8   3   0 1210.28  124.69 
  -8   3   0 1158.88   88.19 
   8   3   0  955.80  101.39 
   8   3   0 1143.79   94.89 
   8   3   0 1124.99  121.29 
  -8   3   0 1083.29   89.19 
  -8   3   0 1089.69   97.19 
  -8   3   0 1028.60   84.19 
  -8   3   0 1078.49   81.89 
  -8   3   0 1101.09   90.09 
  -8   3   0 1244.88   85.49 
  -8   3   0  989.00   94.39 
   8   3   0 1107.29  109.39 
  -8   3   0 1158.88   87.79 
   8   3   0 1044.10   87.19 
   8   3   0 1067.79   88.59 
  -8   3   0 1104.19   92.29 
   8   3   0  994.10   85.29 
   8   3   0 1120.89   94.79 
   8   3   0  996.30  102.99 
   8   3   0 1086.59  110.39 
  -8   3   0 1292.07  102.19 
  -9  -3   0  284.87   63.89 
   9  -3   0  208.68   50.89 
  -9  -3   0  195.28   54.69 
   9  -3   0  282.87   59.59 
  -9  -3   0  351.56   65.19 
  -9  -3   0  228.78   48.30 
  -9  -3   0  201.78   47.20 
   9  -3   0  393.56   71.09 
   9  -3   0  351.16   70.09 
  -9  -3   0  341.47   60.89 
  -9  -3   0  297.07   58.09 
  -9  -3   0  319.17   64.59 
  -9  -3   0  285.37   73.69 
   9  -3   0  462.25   77.19 
  -9  -3   0  329.57   61.19 
   9  -3   0  262.07   59.49 
  -9  -3   0  337.57   67.29 
   9   3   0  322.17   64.29 
  -9   3   0  335.37   58.69 
  -9   3   0  293.87   63.39 
   9   3   0  293.87   60.69 
  -9   3   0  408.06   78.39 
  -9   3   0  370.06   67.99 
  -9   3   0  445.26   67.59 
  -9   3   0  291.67   65.79 
  -9   3   0  333.77   64.89 
  -9   3   0  271.77   64.99 
  -9   3   0  312.87   66.39 
   9   3   0  334.67   68.29 
  -9   3   0  260.97   53.49 
   9   3   0  204.28   52.89 
   9   3   0  348.77   71.69 
   9   3   0  477.45   80.69 
  -9   3   0  225.78   54.99 
   9   3   0  309.07   63.59 
   9   3   0  305.27   60.99 
   9   3   0  295.77   60.19 
   9   3   0  374.96   67.49 
  -9   3   0  286.77   56.09 
   0  -4   0   14.40   14.10 
   0  -4   0   -9.20   13.50 
   0  -4   0   11.60   10.40 
   0  -4   0   11.50    5.50 
   0  -4   0   11.90    8.30 
   0  -4   0   30.40   24.00 
   0  -4   0    1.30    8.00 
   0  -4   0   16.20   18.00 
   0  -4   0   25.50   15.00 
   0  -4   0   18.80   11.50 
   0  -4   0    9.00    6.70 
   0  -4   0   14.20   11.30 
   0  -4   0   15.30    8.90 
   0  -4   0    2.40   12.80 
   0  -4   0   10.20    6.60 
   0  -4   0    4.00    9.40 
   0  -4   0    7.50   16.00 
   0  -4   0    8.30   10.90 
   0  -4   0    3.90    9.60 
   0   4   0   12.60    9.00 
   0   4   0   15.10   11.00 
   0   4   0    7.60    5.90 
   0   4   0    3.40    7.40 
   0   4   0   -3.60    7.40 
   0   4   0    5.80    9.10 
   0   4   0   21.50   11.10 
   0   4   0    1.70    6.80 
   0   4   0   18.10    9.60 
   0   4   0    4.00    8.60 
   0   4   0   21.00    9.80 
   0   4   0   11.30    5.20 
   0   4   0    7.80   10.40 
   0   4   0    2.90    9.30 
   0   4   0   12.20    8.70 
   0   4   0    2.50    6.10 
   0   4   0    9.60    9.80 
  -1  -4   0 7138.39  240.38 
   1  -4   0 6652.03  260.67 
   1  -4   0 7136.09  221.88 
  -1  -4   0 7402.96  247.28 
  -1  -4   0 7445.85  223.08 
  -1  -4   0 7710.23  255.17 
  -1  -4   0 7218.68  243.98 
   1  -4   0 7388.46  248.38 
   1  -4   0 7112.59  251.67 
   1  -4   0 7328.07  241.18 
   1  -4   0 7171.88  250.37 
  -1  -4   0 7381.36  249.38 
   1  -4   0 7502.15  226.98 
  -1  -4   0 6888.81  269.37 
   1  -4   0 7416.86  222.18 
  -1  -4   0 7465.15  244.88 
   1  -4   0 7287.07  256.07 
  -1  -4   0 7274.87  246.88 
  -1  -4   0 7256.37  255.77 
   1  -4   0 7465.95  224.38 
   1  -4   0 7390.46  252.87 
   1  -4   0 6668.63  260.77 
  -1  -4   0 7413.36  250.57 
  -1  -4   0 7131.69  261.17 
   1  -4   0 7529.75  248.88 
   1  -4   0 7409.96  249.48 
  -1  -4   0 7398.86  214.78 
   1  -4   0 7347.96  245.28 
   1  -4   0 7359.36  248.98 
   1  -4   0 7168.48  242.78 
   1  -4   0 6975.60  284.67 
  -1  -4   0 7490.35  244.38 
   1   4   0 7552.94  236.38 
  -1   4   0 7355.26  242.08 
  -1   4   0 7377.06  237.38 
   1   4   0 7291.17  229.78 
  -1   4   0 7272.47  274.27 
  -1   4   0 7344.77  239.68 
  -1   4   0 7402.26  240.98 
  -1   4   0 7410.26  230.08 
   1   4   0 7638.04  244.08 
   1   4   0 7142.29  241.08 
   1   4   0 7522.15  243.88 
  -1   4   0 7773.32  258.37 
   1   4   0 7625.94  238.88 
   1   4   0 7629.84  251.27 
   1   4   0 7257.77  249.38 
   1   4   0 7679.43  222.38 
   1   4   0 7278.97  221.38 
   1   4   0 7218.88  239.68 
   1   4   0 7266.77  243.28 
   1   4   0 7285.37  247.28 
  -1   4   0 7345.07  218.88 
  -1   4   0 6748.02  257.97 
  -1   4   0 7379.36  243.38 
   1   4   0 7448.15  239.48 
   1   4   0 7557.44  251.57 
  -1   4   0 7399.96  247.98 
   1   4   0 7044.60  252.07 
   1   4   0 7685.93  241.08 
   1   4   0 7720.63  255.07 
  -1   4   0 7171.48  248.08 
   1   4   0 7525.95  241.18 
  -1   4   0 7329.87  241.78 
  -1   4   0 7254.77  238.58 
  -1   4   0 7326.57  214.58 
   2  -4   0   22.30   11.70 
  -2  -4   0   29.40    8.10 
  -2  -4   0   30.70   14.80 
  -2  -4   0   18.40    9.40 
   2  -4   0   31.20   14.90 
  -2  -4   0    4.60    8.60 
  -2  -4   0   22.60   15.10 
   2  -4   0    8.30    9.30 
  -2  -4   0   18.90   13.00 
  -2  -4   0   30.00   10.10 
   2  -4   0   12.00   10.70 
  -2  -4   0   22.20    9.70 
  -2  -4   0   21.40   12.90 
   2  -4   0   30.70   15.90 
  -2  -4   0   25.40   15.80 
  -2  -4   0   30.10   12.90 
  -2  -4   0   38.60   15.40 
   2  -4   0    9.30    9.50 
  -2  -4   0    9.70   10.80 
   2  -4   0   -1.70   12.70 
  -2  -4   0   14.00    9.10 
   2  -4   0   27.00   13.70 
  -2  -4   0   32.50   14.20 
   2  -4   0    6.50   12.90 
   2  -4   0   20.90    9.70 
  -2  -4   0   21.20   13.30 
  -2   4   0   47.90   17.30 
  -2   4   0   22.60    7.50 
   2   4   0   31.20   15.10 
  -2   4   0   21.20   13.80 
   2   4   0   11.00    9.80 
  -2   4   0   31.70   16.10 
  -2   4   0   14.70    9.50 
   2   4   0   19.50   11.90 
   2   4   0    6.00    6.70 
  -2   4   0   28.70   12.00 
  -2   4   0    2.60   12.80 
  -2   4   0   13.80    8.10 
  -2   4   0   16.10    7.00 
   2   4   0   -1.10    9.60 
  -2   4   0   26.90   11.40 
   2   4   0   33.60   11.30 
  -2   4   0   16.20    9.00 
   2   4   0   19.20   13.70 
  -2   4   0   15.10    6.60 
  -2   4   0   32.70   10.40 
  -2   4   0   24.00   10.90 
   2   4   0   -3.30    7.30 
   2   4   0   18.40   12.70 
   2   4   0   13.90    9.00 
  -2   4   0   18.90   11.60 
  -2   4   0   21.90    8.30 
  -2   4   0   11.80   10.60 
   2   4   0   18.70    7.50 
  -2   4   0   25.70   15.00 
   2   4   0   27.70   12.70 
   2   4   0   54.49   16.80 
   2   4   0   24.40   10.60 
  -2   4   0   22.50   10.80 
   2   4   0   40.60   14.60 
   2   4   0   30.00   10.80 
  -2   4   0   -8.40   10.30 
   2   4   0   16.50   10.00 
  -2   4   0   13.60   10.30 
   2   4   0   47.10   17.50 
   3  -4   0 1830.32   90.49 
  -3  -4   0 2216.88  103.89 
  -3  -4   0 1974.60  103.79 
   3  -4   0 1839.92   89.39 
   3  -4   0 2094.09   86.99 
   3  -4   0 1826.02   91.49 
   3  -4   0 1946.21  100.59 
   3  -4   0 1825.82  102.89 
  -3  -4   0 1982.60   81.49 
  -3  -4   0 2073.09  101.29 
  -3  -4   0 1989.90   93.19 
   3  -4   0 2029.10   83.99 
  -3  -4   0 1798.32   95.99 
  -3  -4   0 1898.61   96.49 
  -3  -4   0 1899.01  101.89 
  -3  -4   0 1836.62   94.19 
  -3  -4   0 1955.70   95.49 
   3  -4   0 1881.81   88.19 
   3  -4   0 1806.42   83.99 
   3  -4   0 1929.01   90.69 
  -3  -4   0 1862.51   81.69 
   3   4   0 1885.31   84.49 
  -3   4   0 1918.61   89.29 
  -3   4   0 2029.10   83.29 
   3   4   0 1910.51   81.29 
  -3   4   0 2007.70   93.59 
   3   4   0 1953.50   94.99 
   3   4   0 1933.61   92.59 
  -3   4   0 2002.20   90.59 
   3   4   0 1928.51   97.59 
  -3   4   0 1981.00   74.59 
  -3   4   0 1884.11   91.69 
  -3   4   0 1907.11   84.99 
   3   4   0 1943.21   75.99 
  -3   4   0 1963.50   82.69 
  -3   4   0 1885.21   96.89 
   3   4   0 1913.81  100.39 
  -3   4   0 2077.19  106.29 
  -3   4   0 2007.00   81.29 
  -3   4   0 2124.59   81.79 
  -3   4   0 1944.21   84.49 
   3   4   0 1995.00   96.29 
   3   4   0 1871.21   87.49 
  -3   4   0 1847.62   77.59 
  -3   4   0 1839.12   75.79 
   3   4   0 1971.10   89.79 
   3   4   0 2050.49   99.49 
  -3   4   0 1877.01  101.29 
   3   4   0 1909.51   74.39 
   3   4   0 1940.81   94.79 
   3   4   0 1819.12   97.29 
   3   4   0 1853.51   99.89 
  -3   4   0 2004.30   85.99 
  -3   4   0 1878.21   87.39 
   4  -4   0   97.89   21.90 
  -4  -4   0   39.30   20.10 
  -4  -4   0   57.69   21.30 
  -4  -4   0   82.89   25.00 
   4  -4   0  113.99   22.80 
  -4  -4   0   54.59   23.80 
  -4  -4   0   65.69   17.70 
   4  -4   0   53.79   20.10 
   4  -4   0   53.09   16.60 
  -4  -4   0   53.19   25.20 
   4  -4   0   92.69   23.70 
  -4  -4   0   71.09   23.60 
  -4  -4   0  116.49   27.60 
  -4  -4   0   50.89   19.70 
   4  -4   0   45.00   16.00 
  -4  -4   0   66.59   22.70 
  -4  -4   0   38.60   18.20 
  -4  -4   0   74.99   20.00 
   4  -4   0   66.69   21.60 
   4  -4   0   72.09   20.70 
   4  -4   0   74.29   18.00 
  -4   4   0   68.19   13.30 
  -4   4   0   87.19   22.60 
  -4   4   0   61.89   18.40 
  -4   4   0   50.59   19.30 
   4   4   0  106.09   27.10 
   4   4   0   91.29   20.90 
  -4   4   0   39.90   16.70 
   4   4   0   39.40   17.60 
   4   4   0   49.60   16.40 
  -4   4   0   68.39   18.00 
  -4   4   0   72.29   21.60 
   4   4   0   71.69   21.50 
   4   4   0   40.50   15.70 
   4   4   0   96.39   25.30 
  -4   4   0   62.29   16.40 
   4   4   0   58.19   18.90 
   4   4   0   91.59   23.60 
   4   4   0   80.49   25.80 
  -4   4   0   79.29   18.40 
   4   4   0   65.09   16.50 
  -4   4   0  101.39   16.30 
  -4   4   0   85.69   16.70 
  -4   4   0   54.99   14.30 
   4   4   0   86.29   27.10 
   4   4   0   61.59   21.00 
  -4   4   0   56.79   20.00 
  -4   4   0   87.59   27.50 
  -4   4   0   98.99   19.20 
  -4   4   0   65.09   18.10 
   4   4   0  112.49   30.70 
  -5  -4   0 1043.10   77.49 
   5  -4   0 1173.58   74.29 
  -5  -4   0 1260.87   69.59 
   5  -4   0 1198.58   73.99 
  -5  -4   0 1160.08   79.39 
  -5  -4   0 1244.98   71.69 
  -5  -4   0 1125.29   84.99 
  -5  -4   0 1108.99   78.99 
   5  -4   0 1260.47   75.19 
  -5  -4   0 1056.09   87.09 
   5  -4   0 1186.58   68.79 
  -5  -4   0 1341.97   84.29 
  -5  -4   0 1055.49   79.89 
  -5  -4   0 1279.57   85.89 
   5  -4   0 1122.99   77.09 
   5  -4   0 1061.09   68.39 
   5  -4   0 1050.39   72.29 
   5  -4   0 1130.89   72.39 
   5  -4   0 1200.38   62.39 
  -5  -4   0 1135.09   87.89 
  -5  -4   0 1146.69   79.59 
   5   4   0 1280.27   76.49 
   5   4   0 1220.18   61.19 
  -5   4   0 1013.40   69.89 
   5   4   0 1179.18   71.69 
  -5   4   0 1166.48   64.89 
   5   4   0 1100.39   80.59 
  -5   4   0 1048.30   75.49 
  -5   4   0 1174.78   83.39 
   5   4   0 1011.10   75.69 
  -5   4   0 1220.28   80.19 
   5   4   0 1125.39   63.29 
   5   4   0 1281.87   78.39 
  -5   4   0 1134.89   60.69 
   5   4   0 1131.59   74.49 
   5   4   0 1232.88   74.89 
  -5   4   0 1155.98   67.99 
  -5   4   0 1178.28   52.19 
   5   4   0 1089.69   77.29 
  -5   4   0 1079.49   67.49 
   5   4   0 1074.29   76.09 
   5   4   0  980.60   76.29 
  -5   4   0 1155.28   56.59 
  -5   4   0 1208.78   72.69 
   5   4   0 1182.28   84.79 
   5   4   0 1065.09   76.99 
  -5   4   0 1215.68   74.19 
   5   4   0 1084.69   74.49 
   5   4   0 1192.08   80.99 
  -6  -4   0  214.08   37.60 
  -6  -4   0  161.18   32.60 
   6  -4   0  416.36   62.59 
   6  -4   0  286.47   44.00 
  -6  -4   0  246.08   49.60 
  -6  -4   0  219.38   53.49 
  -6  -4   0  266.27   46.60 
   6  -4   0  365.56   40.00 
   6  -4   0  302.37   44.70 
  -6  -4   0  211.48   46.30 
  -6  -4   0  215.18   49.40 
   6  -4   0  229.38   42.30 
   6  -4   0  284.97   50.19 
   6  -4   0  272.57   46.40 
  -6  -4   0  317.17   52.89 
  -6  -4   0  194.58   50.99 
  -6  -4   0  286.47   51.49 
   6  -4   0  235.08   41.20 
  -6  -4   0  297.17   50.89 
  -6   4   0  326.07   42.20 
   6   4   0  262.47   49.10 
   6   4   0  241.68   45.90 
  -6   4   0  246.98   41.00 
  -6   4   0  268.27   34.00 
   6   4   0  289.27   49.40 
  -6   4   0  313.77   43.20 
   6   4   0  270.07   54.19 
  -6   4   0  259.67   44.40 
   6   4   0  470.25   65.49 
  -6   4   0  249.58   47.30 
  -6   4   0  315.77   50.89 
  -6   4   0  330.97   46.30 
   6   4   0  338.67   49.90 
   6   4   0  329.97   50.79 
  -6   4   0  263.77   46.20 
  -6   4   0  346.17   55.59 
   6   4   0  314.57   33.50 
  -6   4   0  266.57   34.90 
  -6   4   0  233.58   43.50 
   6   4   0  235.88   40.70 
   6   4   0  315.07   37.90 
  -6   4   0  238.98   45.90 
   6   4   0  269.67   48.50 
  -6   4   0  253.67   43.00 
   6   4   0  274.47   49.80 
  -6   4   0  303.87   36.30 
   6   4   0  263.37   43.30 
   6   4   0  282.37   51.59 
  -6   4   0  246.28   41.70 
   6   4   0  268.77   45.50 
   6   4   0  296.47   44.80 
  -6   4   0  313.17   54.89 
  -7  -4   0  528.45   84.29 
  -7  -4   0  452.35   65.69 
   7  -4   0  554.24   65.99 
  -7  -4   0  539.95   77.89 
  -7  -4   0  534.15   65.69 
  -7  -4   0  434.66   57.59 
  -7  -4   0  593.74   91.29 
  -7  -4   0  280.57   53.19 
   7  -4   0  677.43   77.59 
   7  -4   0  655.53   77.89 
  -7  -4   0  576.24   88.49 
  -7  -4   0  548.55   71.69 
  -7  -4   0  610.14   73.49 
   7  -4   0  570.74   78.09 
   7  -4   0  527.25   72.39 
  -7  -4   0  533.25   72.09 
  -7   4   0  573.34   79.39 
  -7   4   0  470.85   64.39 
   7   4   0  567.94   61.89 
   7   4   0  561.54   78.79 
  -7   4   0  478.55   66.59 
   7   4   0  491.85   61.19 
   7   4   0  588.64   74.19 
  -7   4   0  652.83   86.49 
  -7   4   0  460.75   59.09 
  -7   4   0  537.45   66.69 
   7   4   0  622.94   79.69 
  -7   4   0  507.25   64.29 
  -7   4   0  484.15   67.39 
   7   4   0  486.55   70.59 
   7   4   0  637.64   81.89 
  -7   4   0  587.54   65.09 
  -7   4   0  526.25   64.89 
   7   4   0  548.95   68.19 
   7   4   0  436.46   72.09 
  -7   4   0  582.34   70.59 
  -7   4   0  538.55   73.89 
   7   4   0  536.85   72.49 
   7   4   0  618.04   80.29 
  -7   4   0  509.35   72.69 
  -7   4   0  521.15   69.19 
   7   4   0  436.26   63.99 
   7   4   0  551.94   74.99 
  -8  -4   0   85.89   35.40 
  -8  -4   0  138.19   40.70 
  -8  -4   0  145.19   48.50 
  -8  -4   0   94.29   35.80 
  -8  -4   0  113.19   39.70 
  -8  -4   0  179.98   58.19 
  -8  -4   0  172.28   44.80 
  -8  -4   0  242.88   47.80 
  -8  -4   0  155.68   49.40 
  -8  -4   0  153.48   42.70 
  -8  -4   0  188.58   45.20 
  -8   4   0  168.18   40.80 
  -8   4   0  123.49   40.30 
  -8   4   0  203.38   56.69 
  -8   4   0  164.38   42.90 
  -8   4   0  197.98   48.20 
  -8   4   0  133.89   37.80 
   8   4   0  177.78   48.60 
  -8   4   0  200.68   47.90 
  -8   4   0  105.49   38.90 
   8   4   0  147.59   43.10 
   8   4   0   63.19   29.80 
   8   4   0  133.99   45.30 
   8   4   0  241.98   59.39 
   8   4   0   97.89   34.70 
  -8   4   0  144.39   44.20 
   8   4   0  162.38   44.90 
   8   4   0  212.08   50.59 
   8   4   0  153.68   46.80 
  -8   4   0  168.38   48.70 
  -8   4   0  136.29   43.50 
   8   4   0  164.08   44.90 
  -8   4   0  101.89   36.90 
  -8   4   0  222.08   47.80 
  -9  -4   0   30.30   28.20 
  -9  -4   0  -18.10   16.10 
  -9  -4   0   -3.40   18.30 
  -9  -4   0   11.20   21.30 
  -9  -4   0   -1.60   26.40 
  -9  -4   0   -5.60   16.30 
  -9  -4   0   21.20   24.50 
  -9  -4   0   35.20   29.00 
  -9  -4   0   16.30   20.70 
  -9  -4   0   35.40   32.10 
  -9  -4   0    7.10   27.40 
   9   4   0   -6.60   17.20 
  -9   4   0  -12.60   19.00 
   9   4   0  -23.60   21.30 
   9   4   0  -17.30   17.60 
  -9   4   0   31.70   22.20 
  -9   4   0  -11.10   23.10 
  -9   4   0   13.40   25.00 
  -9   4   0   -2.90   22.40 
   9   4   0   25.00   26.40 
  -9   4   0    5.10   29.00 
  -9   4   0   -2.40   19.00 
  -9   4   0   -3.90   21.20 
  -9   4   0   -7.10   17.40 
   9   4   0   14.20   24.10 
  -9   4   0  -14.60   28.00 
  -9   4   0   -4.80   19.20 
  -9   4   0   19.50   24.60 
   9   4   0    8.90   17.30 
   9   4   0   -5.80   19.90 
   9   4   0   -6.70   19.40 
   9   4   0  -12.00   21.50 
   9   4   0  -12.20   19.10 
   0  -5   0    0.10    8.50 
   0  -5   0   16.40   22.40 
   0  -5   0   10.20    7.20 
   0  -5   0   -1.30    8.20 
   0  -5   0   -7.70   12.70 
   0  -5   0  -13.60    6.20 
   0  -5   0    4.60   16.00 
   0  -5   0   12.50   12.10 
   0  -5   0   15.90   17.70 
   0  -5   0    4.40   14.80 
   0  -5   0   -5.10    6.00 
   0  -5   0   -6.10   12.40 
   0  -5   0    9.10   13.00 
   0  -5   0    5.40   11.10 
   0  -5   0    4.20    3.70 
   0  -5   0    7.10    9.80 
   0  -5   0    0.90    8.90 
   0  -5   0  -16.30   14.10 
   0   5   0    2.90    4.60 
   0   5   0    0.60    8.20 
   0   5   0   -2.20    7.30 
   0   5   0    7.80   11.50 
   0   5   0    7.60    6.00 
   0   5   0   15.00   10.40 
   0   5   0    8.30   11.30 
   0   5   0  -10.80    7.60 
   0   5   0    4.80    6.80 
   0   5   0    5.60    8.20 
   0   5   0   -2.70    6.90 
   0   5   0    0.90    6.30 
   0   5   0   -1.00    8.50 
   0   5   0   -0.10    7.30 
   0   5   0    2.80    5.60 
   0   5   0   17.70   11.50 
   0   5   0   -3.70    8.70 
   1  -5   0  161.08   43.50 
  -1  -5   0  128.49   24.80 
  -1  -5   0   76.79   31.20 
   1  -5   0   92.99   22.20 
   1  -5   0   87.29   23.50 
   1  -5   0  112.59   27.80 
   1  -5   0  110.19   35.00 
  -1  -5   0   97.09   23.60 
  -1  -5   0  106.19   31.20 
   1  -5   0  101.49   17.80 
  -1  -5   0  111.29   25.20 
  -1  -5   0  105.89   25.50 
  -1  -5   0  112.39   25.80 
   1  -5   0  128.49   17.30 
   1  -5   0   94.69   25.00 
   1  -5   0  126.39   27.10 
   1  -5   0  134.29   35.00 
   1  -5   0  126.19   15.50 
  -1  -5   0   89.19   24.40 
   1  -5   0  118.69   23.90 
   1  -5   0  107.89   23.50 
   1  -5   0  118.69   26.50 
  -1  -5   0  138.79   16.20 
  -1  -5   0  143.99   29.20 
  -1  -5   0  138.79   28.60 
   1  -5   0  100.89   23.90 
  -1  -5   0  117.09   27.50 
  -1  -5   0  108.79   35.40 
   1  -5   0  121.69   14.20 
  -1   5   0  163.68   21.90 
   1   5   0  107.19   22.60 
   1   5   0  100.59   20.90 
   1   5   0  142.39   30.70 
   1   5   0  103.39   26.70 
  -1   5   0  131.49   30.50 
   1   5   0  135.39   33.20 
   1   5   0  156.08   24.50 
   1   5   0  110.39   21.20 
  -1   5   0  115.19   24.40 
   1   5   0  116.59   22.20 
   1   5   0   70.49   21.70 
  -1   5   0  120.29   26.40 
   1   5   0   96.09   22.50 
  -1   5   0  131.69   24.80 
   1   5   0  109.99   23.40 
   1   5   0   55.39   18.00 
   1   5   0  143.59   28.90 
   1   5   0  174.38   30.90 
  -1   5   0  111.99    9.60 
  -1   5   0  131.79   27.00 
  -1   5   0  139.79   27.80 
  -1   5   0  100.49   23.30 
   1   5   0  123.39   13.00 
   1   5   0   86.79   16.00 
   1   5   0  182.08   32.20 
   1   5   0  110.99   24.50 
  -1   5   0  145.49   24.30 
   1   5   0  111.29   21.80 
  -1   5   0   98.99   20.10 
   1   5   0  135.89   15.10 
  -1   5   0  153.08   28.50 
  -1   5   0   77.19   19.40 
   2  -5   0  153.18   26.30 
   2  -5   0  209.18   30.20 
  -2  -5   0  115.49   26.10 
   2  -5   0  113.19   27.00 
  -2  -5   0  166.88   35.60 
   2  -5   0  152.88   20.80 
  -2  -5   0  167.78   31.60 
  -2  -5   0  106.89   33.70 
   2  -5   0  146.99   30.70 
  -2  -5   0  143.99   21.80 
  -2  -5   0  168.78   18.20 
  -2  -5   0  108.39   25.40 
   2  -5   0  131.59   28.50 
  -2  -5   0  110.59   25.50 
  -2  -5   0  206.78   35.80 
  -2  -5   0  161.68   31.40 
   2  -5   0  170.98   37.10 
   2  -5   0  135.59   30.90 
  -2  -5   0  130.99   15.80 
  -2  -5   0  213.18   43.80 
   2  -5   0  152.48   34.40 
   2   5   0  200.98   33.10 
   2   5   0  131.09   18.40 
   2   5   0  174.08   28.60 
  -2   5   0  132.99   29.40 
  -2   5   0  119.69   26.30 
  -2   5   0  113.69   27.30 
  -2   5   0  161.78   17.50 
   2   5   0  113.89   24.90 
   2   5   0  165.28   32.80 
   2   5   0  150.58   22.80 
   2   5   0  193.68   36.30 
   2   5   0  154.58   27.40 
  -2   5   0  160.38   37.30 
   2   5   0  181.48   32.60 
  -2   5   0  106.09   14.20 
  -2   5   0  131.39   20.90 
  -2   5   0  132.29   24.00 
   2   5   0  138.69   27.40 
   2   5   0  140.09   32.20 
  -2   5   0  143.49   19.30 
  -2   5   0  182.28   29.60 
   2   5   0  167.18   33.90 
   2   5   0   86.69   23.90 
   2   5   0  167.08   29.60 
   2   5   0  102.39   25.40 
  -2   5   0  126.99   35.90 
  -2   5   0   93.99   20.90 
  -2   5   0  129.99   17.10 
  -2   5   0  186.58   31.60 
  -2   5   0  142.29   26.90 
  -3  -5   0   -3.40    8.10 
   3  -5   0   15.30   15.50 
  -3  -5   0   -4.30   11.40 
  -3  -5   0    5.50    8.00 
   3  -5   0    2.30   10.30 
  -3  -5   0   29.20   11.50 
  -3  -5   0   -0.50   11.40 
  -3  -5   0   -9.20    9.30 
  -3  -5   0    9.40   15.00 
  -3  -5   0   21.90   16.30 
  -3  -5   0    1.00   12.00 
   3  -5   0   21.90   14.50 
   3  -5   0   13.30   12.00 
   3  -5   0    1.10    7.90 
   3  -5   0    6.30   10.10 
   3  -5   0    0.80   12.10 
   3  -5   0   33.00   20.10 
  -3  -5   0    8.60   13.30 
  -3  -5   0   -5.40    5.60 
  -3  -5   0   10.20   13.50 
  -3  -5   0    9.20   14.50 
  -3   5   0   -2.70    9.60 
  -3   5   0   21.30   11.90 
   3   5   0    0.50    9.30 
  -3   5   0  -16.30    8.00 
   3   5   0   -0.80   10.40 
   3   5   0   -2.00    7.90 
   3   5   0   -1.60    9.50 
  -3   5   0    4.70    7.90 
  -3   5   0   -0.80    6.10 
  -3   5   0    7.10    7.20 
  -3   5   0   -5.40    7.40 
  -3   5   0    4.70    5.80 
  -3   5   0   10.60   10.80 
   3   5   0   -2.20    7.40 
   3   5   0   -0.80    8.90 
  -3   5   0    8.70   12.20 
   3   5   0   -2.20   12.20 
   3   5   0   12.00   14.70 
  -3   5   0   11.40   13.80 
   3   5   0    7.20   11.10 
  -3   5   0   29.40   13.60 
   3   5   0    6.30   12.90 
  -3   5   0    3.40   12.90 
  -3   5   0    3.60    7.40 
  -3   5   0   32.80   14.80 
   3   5   0   -2.10   10.00 
   3   5   0   10.00    8.90 
   3   5   0   -7.50   11.70 
   3   5   0   -6.40    5.60 
   4  -5   0  840.72   59.99 
  -4  -5   0  927.11   80.29 
  -4  -5   0  938.61   69.89 
   4  -5   0  805.92   55.19 
   4  -5   0  860.81   63.59 
  -4  -5   0  941.31   54.29 
  -4  -5   0  890.51   63.89 
   4  -5   0  862.41   57.39 
  -4  -5   0  736.03   81.49 
  -4  -5   0  756.72   76.09 
  -4  -5   0  770.72   63.79 
  -4  -5   0  830.22   68.89 
  -4  -5   0  724.33   65.19 
   4  -5   0  748.93   54.19 
  -4  -5   0  815.72   53.69 
   4  -5   0  878.41   61.69 
   4  -5   0  840.82   58.89 
  -4  -5   0  878.11   75.39 
   4  -5   0  839.02   66.89 
  -4  -5   0  864.91   66.99 
   4   5   0  793.12   80.09 
   4   5   0  846.62   67.99 
   4   5   0  677.13   52.49 
  -4   5   0  845.42   61.59 
   4   5   0  852.71   38.40 
   4   5   0  798.52   66.29 
  -4   5   0  876.31   69.69 
  -4   5   0  991.90   60.59 
   4   5   0  852.71   57.59 
   4   5   0  889.21   46.90 
  -4   5   0  718.93   46.70 
  -4   5   0  735.03   48.80 
   4   5   0  800.32   63.39 
   4   5   0  769.02   62.89 
  -4   5   0  918.41   59.79 
   4   5   0  909.21   55.29 
   4   5   0  718.13   77.19 
  -4   5   0  764.12   57.39 
  -4   5   0  821.12   63.29 
   4   5   0  857.01   59.49 
   4   5   0  806.82   58.09 
  -4   5   0  915.11   53.49 
  -4   5   0  871.21   62.29 
  -4   5   0  765.62   83.39 
   4   5   0  818.52   69.69 
   4   5   0  779.52   60.99 
   4   5   0  818.42   63.99 
  -5  -5   0   38.10   18.80 
   5  -5   0   52.79   20.60 
   5  -5   0   18.50   16.40 
   5  -5   0   52.99   18.90 
  -5  -5   0   22.40   18.60 
  -5  -5   0   43.20   24.00 
   5  -5   0   18.40   15.60 
  -5  -5   0   10.80   15.80 
  -5  -5   0   16.90   18.50 
  -5  -5   0   37.30   17.00 
   5  -5   0   27.00   19.90 
  -5  -5   0   36.90   16.60 
  -5  -5   0   11.50   18.60 
   5  -5   0   21.10   13.60 
  -5  -5   0  -13.30   12.30 
  -5  -5   0  -10.40   13.60 
  -5  -5   0   31.80   24.60 
   5  -5   0   31.20   19.40 
  -5  -5   0   25.70   19.30 
  -5   5   0   51.29   25.50 
   5   5   0   67.69   20.90 
   5   5   0   16.20   15.90 
  -5   5   0   51.09   23.60 
  -5   5   0   42.20   19.90 
   5   5   0   41.30   20.10 
   5   5   0   16.60   16.20 
  -5   5   0   23.60   19.20 
   5   5   0   15.90   17.70 
   5   5   0   13.40   16.80 
  -5   5   0   53.39   19.00 
   5   5   0   34.50   15.80 
   5   5   0   39.40   17.60 
   5   5   0   53.99   20.20 
   5   5   0   55.19   24.20 
   5   5   0   35.80   16.80 
   5   5   0   57.39   24.00 
  -5   5   0   34.20   16.60 
  -5   5   0   32.90   13.50 
  -5   5   0   27.10   15.40 
  -5   5   0   43.70   18.20 
   5   5   0    1.90   12.50 
   5   5   0   32.70   22.80 
   5   5   0    4.80   17.30 
  -5   5   0   34.00   19.90 
  -6  -5   0 2481.65  136.59 
   6  -5   0 2520.95  134.59 
  -6  -5   0 2211.68  133.79 
  -6  -5   0 2419.16  141.89 
   6  -5   0 2575.24  128.09 
   6  -5   0 2401.96  122.89 
  -6  -5   0 2835.22  148.99 
  -6  -5   0 2359.66  152.58 
  -6  -5   0 2370.56  119.39 
  -6  -5   0 2372.16  135.09 
  -6  -5   0 2571.54  124.39 
  -6  -5   0 2343.87  137.19 
  -6  -5   0 2206.48  141.29 
   6  -5   0 2441.16  122.09 
  -6  -5   0 2411.36  150.28 
   6  -5   0 2446.76  127.79 
  -6   5   0 2565.54  121.49 
   6   5   0 2349.96  139.59 
   6   5   0 2631.14  134.19 
  -6   5   0 2634.34  120.29 
   6   5   0 2656.23  145.59 
   6   5   0 2638.04  133.09 
   6   5   0 2616.34  118.29 
   6   5   0 2646.74  138.29 
   6   5   0 2500.75  115.19 
   6   5   0 2340.07  128.59 
  -6   5   0 2354.76  119.89 
  -6   5   0 2313.07  134.39 
  -6   5   0 2463.65  129.69 
   6   5   0 2566.24  140.99 
   6   5   0 2522.65  131.29 
   6   5   0 2709.53  137.49 
  -6   5   0 2115.09  130.19 
  -6   5   0 2479.45  126.49 
  -6   5   0 2321.87  113.99 
  -6   5   0 2480.95  135.89 
  -6   5   0 2448.96  126.99 
  -6   5   0 2305.67  140.59 
   6   5   0 2768.62  144.69 
  -6   5   0 2269.67  117.69 
   6   5   0 2588.34  140.19 
   6   5   0 2501.15  139.19 
  -6   5   0 2325.17  126.79 
   6   5   0 2489.85  145.99 
  -7  -5   0   14.20   19.20 
   7  -5   0   40.20   20.30 
  -7  -5   0   43.10   30.30 
  -7  -5   0  112.89   35.90 
   7  -5   0   17.40   19.50 
  -7  -5   0   54.29   24.00 
  -7  -5   0   54.59   26.70 
  -7  -5   0   24.50   23.50 
  -7  -5   0   44.50   22.10 
   7  -5   0   34.30   28.30 
   7  -5   0   20.10   20.40 
  -7  -5   0   37.70   32.30 
  -7  -5   0   30.60   29.10 
  -7  -5   0   46.70   26.10 
   7  -5   0   65.39   28.80 
  -7  -5   0   19.40   24.70 
  -7   5   0   17.90   19.20 
   7   5   0   42.70   24.80 
   7   5   0   33.70   25.20 
   7   5   0   46.80   27.20 
  -7   5   0   20.40   22.40 
  -7   5   0   45.20   31.90 
   7   5   0   59.49   28.40 
   7   5   0   29.00   26.40 
   7   5   0   28.10   25.30 
  -7   5   0   57.49   29.90 
  -7   5   0   54.59   28.50 
  -7   5   0   22.00   17.40 
  -7   5   0   58.69   32.00 
  -7   5   0   32.20   20.80 
  -7   5   0   59.79   24.90 
   7   5   0   28.90   23.30 
  -7   5   0  106.59   36.00 
  -7   5   0   34.30   24.70 
   7   5   0   48.20   24.10 
   7   5   0   36.80   24.10 
   7   5   0   33.50   23.20 
   7   5   0   33.50   23.90 
  -7   5   0   66.79   26.20 
  -7   5   0   27.50   21.40 
  -7   5   0   55.49   28.50 
   7   5   0   17.70   24.50 
  -8  -5   0 1491.95  130.99 
  -8  -5   0 1595.84  117.69 
  -8  -5   0 1469.15  102.89 
  -8  -5   0 2015.90  135.59 
  -8  -5   0 1711.13  140.19 
  -8  -5   0 1678.13  121.99 
  -8  -5   0 1739.93  118.79 
  -8  -5   0 1706.13  122.89 
  -8  -5   0 1592.84  107.19 
  -8  -5   0 1613.74  132.29 
  -8   5   0 1585.54  115.79 
  -8   5   0 1433.06  110.99 
   8   5   0 1785.82  125.89 
   8   5   0 1760.92  123.79 
  -8   5   0 1451.45   98.79 
   8   5   0 1454.55  115.89 
  -8   5   0 1556.84  112.79 
   8   5   0 1467.85  112.89 
  -8   5   0 1679.33  123.89 
   8   5   0 1516.05  119.99 
  -8   5   0 1679.93  119.29 
  -8   5   0 1670.83  118.19 
  -8   5   0 1564.54  121.59 
   8   5   0 1437.96  117.29 
   8   5   0 1410.66  114.79 
   8   5   0 1549.45  118.19 
  -8   5   0 1476.35  104.39 
   8   5   0 1574.24  125.49 
   8   5   0 1524.35  113.09 
  -8   5   0 1662.83  118.39 
  -8   5   0 1679.23  131.09 
  -8   5   0 1697.33  113.49 
  -9  -5   0   26.50   25.70 
  -9  -5   0   33.40   29.50 
  -9  -5   0   47.10   41.20 
  -9  -5   0   10.50   26.80 
  -9  -5   0   29.20   24.50 
  -9  -5   0   -0.20   22.50 
  -9  -5   0   32.40   27.90 
  -9  -5   0    6.70   29.90 
  -9  -5   0   45.60   33.80 
  -9  -5   0  -17.40   25.00 
  -9  -5   0  -27.90   22.40 
  -9  -5   0  -28.50   19.20 
   9   5   0    9.60   27.80 
   9   5   0   52.69   32.10 
   9   5   0   38.40   32.60 
  -9   5   0   25.40   23.30 
  -9   5   0   -0.60   22.60 
   9   5   0   -2.80   20.70 
   9   5   0    5.80   18.80 
   9   5   0    4.00   27.50 
  -9   5   0    7.10   20.90 
  -9   5   0   30.50   37.00 
  -9   5   0   40.50   28.00 
  -9   5   0   17.50   25.90 
   9   5   0   20.30   27.10 
   9   5   0   29.60   29.60 
   9   5   0   -1.10   20.10 
  -9   5   0   11.70   30.60 
  -9   5   0    3.70   28.60 
   9   5   0    6.80   26.00 
  -9   5   0   -6.80   21.40 
  -9   5   0   17.70   26.40 
  -9   5   0  -12.30   30.30 
   0  -6   0  709.53   49.00 
   0  -6   0  735.03   59.19 
   0  -6   0  521.95   62.79 
   0  -6   0  816.42   70.49 
   0  -6   0  609.44   83.19 
   0  -6   0  572.14   65.49 
   0  -6   0  727.43   59.59 
   0  -6   0  714.73   55.79 
   0  -6   0  690.23   36.60 
   0  -6   0  699.93   78.09 
   0  -6   0  808.72   89.19 
   0  -6   0  796.62   61.69 
   0  -6   0  632.34   73.79 
   0  -6   0  644.84   99.59 
   0  -6   0  720.43   58.29 
   0  -6   0  775.32   65.59 
   0   6   0  560.04   60.49 
   0   6   0  710.13   51.79 
   0   6   0  637.54   54.19 
   0   6   0  791.92   52.99 
   0   6   0  726.83   59.79 
   0   6   0  729.73   56.59 
   0   6   0  615.54   46.30 
   0   6   0  709.53   44.50 
   0   6   0  668.53   47.30 
   0   6   0  678.03   42.30 
   0   6   0  670.83   58.49 
   0   6   0  733.03   30.20 
   0   6   0  799.42   57.59 
   0   6   0  688.23   47.10 
   0   6   0  670.23   38.80 
   0   6   0  655.93   53.99 
   0   6   0  597.44   46.00 
   0   6   0  728.83   57.59 
   1  -6   0 2617.14  136.39 
  -1  -6   0 2209.68  154.68 
  -1  -6   0 2498.55  128.19 
   1  -6   0 2541.35  112.79 
  -1  -6   0 2513.35  147.09 
   1  -6   0 2559.54  129.69 
  -1  -6   0 2037.70  136.69 
   1  -6   0 2407.76  122.79 
  -1  -6   0 2487.35  122.99 
   1  -6   0 2733.53  132.39 
  -1  -6   0 2669.43  124.39 
   1  -6   0 2472.05   99.29 
   1  -6   0 2408.66   99.59 
   1  -6   0 2556.44  116.49 
   1  -6   0 2615.84  125.79 
   1  -6   0 2406.26  118.39 
  -1  -6   0 2493.95  124.79 
  -1  -6   0 2391.36  111.19 
  -1  -6   0 2554.04  125.89 
  -1  -6   0 2448.26  120.19 
   1  -6   0 2611.74  126.49 
  -1  -6   0 2478.45  122.69 
  -1  -6   0 2576.64  133.09 
   1  -6   0 2798.42  167.88 
   1  -6   0 2558.24  125.09 
  -1  -6   0 2497.85  122.99 
  -1   6   0 2583.54  121.49 
  -1   6   0 2326.87  114.89 
   1   6   0 2499.25  125.39 
   1   6   0 2515.25  114.29 
   1   6   0 2447.85  121.69 
   1   6   0 2417.36   96.69 
   1   6   0 2490.85  123.39 
  -1   6   0 2382.56  102.09 
   1   6   0 2413.56  113.49 
   1   6   0 2459.65  113.39 
   1   6   0 2709.53  110.59 
  -1   6   0 2341.87  105.69 
   1   6   0 2705.63  125.39 
   1   6   0 2356.46  125.09 
   1   6   0 2549.24   85.99 
  -1   6   0 2569.54  103.99 
  -1   6   0 2277.67  105.79 
   1   6   0 2504.05  116.89 
   1   6   0 2546.05  109.99 
   1   6   0 2481.45  109.99 
  -1   6   0 2393.86  112.09 
  -1   6   0 2536.35  115.99 
  -1   6   0 2502.85  111.99 
  -1   6   0 2560.04  110.19 
   1   6   0 2614.34  123.49 
  -1   6   0 2492.05  124.19 
   1   6   0 2522.25  123.09 
  -1   6   0 2587.14  124.99 
   1   6   0 2501.85  102.49 
  -1   6   0 2466.15  107.49 
   1   6   0 2481.65  110.89 
  -1   6   0 2530.65  116.49 
   2  -6   0  531.45   58.99 
   2  -6   0  662.33   78.29 
   2  -6   0  592.34   45.10 
   2  -6   0  548.85   60.99 
  -2  -6   0  622.84   84.69 
  -2  -6   0  653.23   89.79 
   2  -6   0  589.84   46.60 
   2  -6   0  574.14   38.30 
  -2  -6   0  568.64   60.59 
   2  -6   0  569.04   32.80 
  -2  -6   0  642.84   67.79 
   2  -6   0  436.36   56.59 
  -2  -6   0  569.04   26.90 
  -2  -6   0  556.24   36.40 
   2  -6   0  691.33   80.69 
  -2  -6   0  442.76   56.69 
  -2  -6   0  628.74   73.79 
  -2  -6   0  667.63   67.59 
  -2  -6   0  413.96   55.89 
  -2  -6   0  519.15   57.09 
   2   6   0  478.05   52.49 
   2   6   0  643.64   35.30 
   2   6   0  581.94   62.69 
   2   6   0  653.23   49.30 
  -2   6   0  647.44   62.89 
  -2   6   0  587.04   47.20 
  -2   6   0  588.34   37.60 
  -2   6   0  564.64   47.80 
   2   6   0  541.25   55.49 
   2   6   0  602.34   64.59 
  -2   6   0  559.74   66.89 
  -2   6   0  543.05   59.19 
   2   6   0  447.36   57.69 
   2   6   0  607.54   61.09 
   2   6   0  520.75   63.39 
   2   6   0  515.55   61.29 
   2   6   0  578.74   66.39 
   2   6   0  569.34   58.69 
   2   6   0  645.64   70.79 
  -2   6   0  585.54   59.89 
  -2   6   0  720.03   73.99 
  -2   6   0  606.74   30.50 
   2   6   0  574.64   40.10 
  -2   6   0  526.05   36.80 
  -2   6   0  518.65   55.39 
   3  -6   0  647.14   43.20 
  -3  -6   0  679.63   74.29 
  -3  -6   0  763.22   63.89 
   3  -6   0  659.73   50.79 
  -3  -6   0  605.84   79.59 
  -3  -6   0  780.82   62.29 
  -3  -6   0  634.54   69.69 
  -3  -6   0  626.14   86.29 
   3  -6   0  593.74   79.99 
  -3  -6   0  569.44   72.79 
   3  -6   0  802.82   53.09 
  -3  -6   0  775.42   80.49 
   3  -6   0  671.33   52.49 
   3  -6   0  741.23   77.99 
  -3  -6   0  685.83   39.80 
   3  -6   0  720.03   72.39 
  -3  -6   0  737.43   61.49 
   3  -6   0  732.33   85.89 
   3   6   0  535.55   60.99 
  -3   6   0  699.53   52.59 
   3   6   0  691.03   48.60 
   3   6   0  721.23   50.79 
   3   6   0  735.63   60.29 
  -3   6   0  791.92   64.29 
  -3   6   0  711.63   40.40 
  -3   6   0  697.33   53.19 
   3   6   0  772.92   81.69 
   3   6   0  755.22   72.89 
   3   6   0  720.13   45.80 
  -3   6   0  723.73   59.59 
   3   6   0  688.83   55.09 
   3   6   0  692.33   75.89 
   3   6   0  789.32   64.19 
   3   6   0  601.44   65.09 
   3   6   0  745.63   59.09 
  -3   6   0  737.53   60.59 
  -3   6   0  784.12   83.19 
   3   6   0  707.53   74.69 
  -3   6   0  642.24   72.39 
  -3   6   0  738.43   51.99 
  -3   6   0  764.32   55.29 
  -3   6   0  757.22   38.60 
   3   6   0  759.02   78.99 
  -4  -6   0  156.08   35.10 
  -4  -6   0  172.48   30.80 
  -4  -6   0  143.19   35.80 
  -4  -6   0  162.28   36.90 
   4  -6   0  221.48   37.60 
   4  -6   0  260.37   45.00 
  -4  -6   0  122.79   34.90 
  -4  -6   0  182.68   27.60 
   4  -6   0  256.47   43.20 
  -4  -6   0  194.58   47.00 
   4  -6   0  223.18   46.40 
   4  -6   0  194.98   32.90 
   4  -6   0  168.78   30.40 
  -4  -6   0  190.28   41.20 
  -4  -6   0  206.48   44.10 
  -4  -6   0  161.38   44.60 
   4  -6   0  184.08   35.70 
  -4  -6   0  221.18   47.40 
  -4  -6   0  267.57   47.90 
   4   6   0  221.28   39.60 
  -4   6   0  204.58   31.70 
   4   6   0  249.38   34.80 
   4   6   0  182.78   34.90 
   4   6   0  225.78   39.80 
   4   6   0  133.69   32.30 
   4   6   0  213.18   44.60 
  -4   6   0  213.88   34.10 
  -4   6   0  214.88   29.60 
   4   6   0  289.57   47.80 
   4   6   0  182.88   42.50 
  -4   6   0  180.78   40.80 
   4   6   0  180.48   45.20 
   4   6   0  167.48   35.90 
   4   6   0  164.28   41.70 
   4   6   0  194.58   42.30 
  -4   6   0  256.07   36.10 
  -4   6   0  189.08   43.00 
   4   6   0  212.88   35.60 
  -4   6   0  136.89   36.60 
  -4   6   0  182.98   34.80 
  -4   6   0  230.38   41.60 
   4   6   0  186.48   30.70 
  -4   6   0  189.28   37.90 
  -4   6   0  167.38   37.30 
   4   6   0  224.18   25.70 
  -5  -6   0  550.24   72.09 
  -5  -6   0  502.25   50.99 
   5  -6   0  453.25   60.49 
  -5  -6   0  432.76   69.49 
   5  -6   0  503.35   59.29 
  -5  -6   0  322.17   62.89 
   5  -6   0  554.14   59.89 
  -5  -6   0  384.96   63.69 
  -5  -6   0  398.16   49.00 
   5  -6   0  397.96   55.29 
   5  -6   0  472.45   61.09 
  -5  -6   0  453.85   66.79 
  -5  -6   0  359.06   57.99 
   5  -6   0  514.55   59.09 
  -5  -6   0  411.66   59.79 
  -5  -6   0  491.55   60.39 
  -5  -6   0  596.04   74.39 
  -5  -6   0  407.76   73.29 
   5  -6   0  449.56   57.09 
  -5   6   0  453.55   61.79 
  -5   6   0  642.74   73.69 
  -5   6   0  531.65   52.89 
   5   6   0  451.95   70.19 
  -5   6   0  392.16   62.79 
   5   6   0  449.86   54.79 
   5   6   0  517.95   65.99 
   5   6   0  623.24   78.59 
   5   6   0  511.35   65.49 
   5   6   0  391.66   61.29 
  -5   6   0  450.45   69.19 
  -5   6   0  592.64   62.39 
  -5   6   0  482.05   59.99 
   5   6   0  506.25   73.69 
  -5   6   0  527.35   66.89 
   5   6   0  478.85   67.19 
  -5   6   0  499.15   50.59 
   5   6   0  422.16   54.69 
   5   6   0  492.05   57.29 
   5   6   0  513.85   67.39 
   5   6   0  364.36   51.89 
   5   6   0  616.14   75.89 
  -5   6   0  523.35   58.39 
   5   6   0  538.55   73.19 
  -6  -6   0  121.19   47.60 
   6  -6   0   86.99   29.00 
   6  -6   0  151.48   36.50 
  -6  -6   0  125.89   37.40 
  -6  -6   0  138.19   34.10 
  -6  -6   0  120.79   43.90 
  -6  -6   0  105.09   34.70 
   6  -6   0  159.88   40.10 
  -6  -6   0  109.19   36.60 
  -6  -6   0   93.49   35.60 
  -6  -6   0  134.19   40.50 
   6  -6   0  167.68   34.50 
  -6  -6   0  131.89   30.50 
  -6  -6   0  193.18   50.29 
  -6  -6   0  179.48   48.50 
  -6   6   0   92.99   25.20 
  -6   6   0  120.89   33.50 
  -6   6   0  113.29   33.90 
  -6   6   0  117.89   35.90 
   6   6   0   96.89   32.80 
   6   6   0  104.29   36.50 
   6   6   0  150.08   40.40 
   6   6   0  176.58   42.90 
   6   6   0  108.59   34.40 
   6   6   0  130.99   40.20 
  -6   6   0  115.29   27.70 
  -6   6   0  126.29   37.50 
   6   6   0  150.58   38.30 
   6   6   0  106.59   31.40 
  -6   6   0  126.49   44.50 
  -6   6   0   98.69   29.80 
   6   6   0  141.39   40.80 
   6   6   0  159.68   35.90 
   6   6   0  101.79   31.50 
  -6   6   0  116.69   38.40 
  -6   6   0  118.49   32.40 
   6   6   0   84.59   33.80 
   6   6   0   50.89   27.10 
  -6   6   0  125.69   37.00 
  -7  -6   0  270.17   47.60 
  -7  -6   0  315.87   62.49 
  -7  -6   0  463.85   90.79 
  -7  -6   0  185.68   52.09 
  -7  -6   0  374.86   68.29 
  -7  -6   0  205.28   49.50 
  -7  -6   0  214.98   53.09 
  -7  -6   0  260.27   47.20 
  -7  -6   0  271.77   69.69 
   7  -6   0  328.77   61.99 
  -7  -6   0  223.98   53.19 
   7  -6   0  361.06   59.49 
  -7  -6   0  344.17   66.19 
  -7   6   0  201.18   49.60 
  -7   6   0  312.67   53.19 
   7   6   0  371.36   70.39 
   7   6   0  323.47   67.59 
   7   6   0  210.08   50.99 
  -7   6   0  295.07   47.00 
   7   6   0  183.68   47.70 
   7   6   0  279.07   52.99 
  -7   6   0  341.57   77.59 
   7   6   0  255.17   55.19 
  -7   6   0  192.08   49.00 
  -7   6   0  311.07   68.89 
  -7   6   0  328.47   57.69 
  -7   6   0  296.67   49.00 
  -7   6   0  238.98   57.69 
   7   6   0  253.87   57.49 
   7   6   0  226.18   50.29 
  -7   6   0  311.37   55.19 
   7   6   0  323.37   69.39 
   7   6   0  324.07   54.89 
   7   6   0  235.18   55.59 
   7   6   0  360.76   66.09 
  -8  -6   0   16.50   26.10 
  -8  -6   0    7.60   20.20 
  -8  -6   0   26.40   28.60 
  -8  -6   0  -14.40   26.30 
  -8  -6   0   15.00   20.50 
  -8  -6   0    1.20   32.30 
  -8  -6   0   23.60   26.00 
  -8  -6   0  -22.60   18.00 
  -8  -6   0   47.20   35.30 
  -8  -6   0    6.10   21.00 
  -8  -6   0   -1.70   27.40 
  -8   6   0  -11.40   21.20 
   8   6   0   10.40   22.70 
  -8   6   0   60.19   53.09 
   8   6   0   23.70   25.30 
   8   6   0   45.80   31.60 
   8   6   0   35.80   25.00 
   8   6   0   -2.50   20.80 
   8   6   0   21.90   25.10 
   8   6   0   -5.50   20.90 
  -8   6   0   -5.20   18.50 
   8   6   0   20.30   30.30 
   8   6   0   24.90   27.30 
  -8   6   0    9.30   21.50 
   8   6   0   18.20   24.50 
  -8   6   0    1.20   18.00 
  -8   6   0   42.80   34.80 
   0  -7   0   29.60   19.10 
   0  -7   0   16.90   20.50 
   0  -7   0   21.70   18.10 
   0  -7   0   -3.20   14.00 
   0  -7   0   -2.60   23.10 
   0  -7   0    3.90   21.70 
   0  -7   0  -13.30   12.80 
   0  -7   0   -6.60   12.80 
   0  -7   0   -1.20   13.50 
   0  -7   0    7.40   15.00 
   0  -7   0   23.50   23.20 
   0  -7   0    7.00   12.30 
   0  -7   0   -7.60   13.30 
   0   7   0   -3.20   10.70 
   0   7   0   -6.20   10.50 
   0   7   0   -5.40   12.60 
   0   7   0    1.50   12.00 
   0   7   0    6.10    7.30 
   0   7   0   -8.00    9.10 
   0   7   0    4.00   10.90 
   0   7   0    3.40   11.70 
   0   7   0   15.90   13.50 
   0   7   0   -3.40   12.30 
   0   7   0    9.00   14.80 
   0   7   0    2.30   10.00 
   0   7   0   11.50   14.10 
   0   7   0    1.80   12.60 
   0   7   0    4.00   13.30 
   0   7   0    5.70   11.20 
  -1  -7   0  109.09   32.00 
  -1  -7   0   90.69   31.10 
   1  -7   0   87.29   22.90 
   1  -7   0   90.39   29.20 
  -1  -7   0   88.99   29.00 
   1  -7   0   74.89   21.10 
   1  -7   0   91.79   30.90 
   1  -7   0   82.99   32.00 
  -1  -7   0  141.89   46.30 
   1  -7   0   70.99   25.80 
  -1  -7   0   86.39   25.80 
  -1  -7   0  110.49   36.30 
  -1  -7   0   81.79   26.40 
  -1  -7   0   81.09   32.10 
  -1  -7   0  104.19   32.20 
  -1  -7   0   57.89   25.60 
  -1  -7   0  103.89   45.60 
   1  -7   0   37.60   21.10 
   1  -7   0   96.19   29.20 
  -1  -7   0   63.79   32.60 
   1  -7   0   96.59   32.20 
  -1  -7   0   76.59   40.90 
  -1  -7   0  123.19   33.40 
   1   7   0  111.79   19.90 
   1   7   0   85.09   24.50 
  -1   7   0   63.19   22.60 
  -1   7   0  127.69   33.60 
  -1   7   0   65.29   27.40 
   1   7   0   78.39   23.30 
   1   7   0   81.89   24.70 
  -1   7   0   93.69   22.90 
   1   7   0   79.39   24.40 
   1   7   0  103.39   32.20 
  -1   7   0   93.49   28.40 
   1   7   0   91.99   24.10 
   1   7   0   73.79   25.80 
   1   7   0   74.39   25.20 
  -1   7   0  108.89   29.70 
   1   7   0  106.39   25.20 
  -1   7   0  120.39   31.50 
  -1   7   0  100.39   27.00 
   1   7   0   75.19   28.10 
   1   7   0  127.59   33.20 
  -1   7   0  116.19   18.80 
  -1   7   0   98.69   32.20 
   1   7   0   64.99   23.70 
  -1   7   0   67.09   24.00 
   1   7   0   49.50   22.20 
  -1   7   0   73.89   21.50 
   1   7   0   99.99   29.80 
  -1   7   0  128.59   27.20 
   1   7   0  108.49   30.80 
  -1   7   0   98.19   26.60 
   1   7   0  113.49   25.60 
  -1   7   0   83.89   20.90 
  -1   7   0   77.69   23.10 
  -2  -7   0   -0.40   14.30 
   2  -7   0   12.70   18.90 
  -2  -7   0   -0.70   21.80 
   2  -7   0   13.30   13.50 
  -2  -7   0  -14.20   12.10 
  -2  -7   0   -1.00   15.20 
   2  -7   0   15.60   23.30 
  -2  -7   0    8.00   16.30 
  -2  -7   0   13.70   24.20 
  -2  -7   0    1.00   13.70 
  -2  -7   0   27.00   21.90 
   2  -7   0   20.30   14.60 
  -2  -7   0   -9.40   13.00 
  -2  -7   0   -1.30   12.70 
  -2  -7   0    8.70   16.60 
   2  -7   0   12.40   17.00 
   2  -7   0   41.80   24.50 
  -2  -7   0   -7.50   23.90 
   2   7   0   14.30   13.00 
   2   7   0   14.10   13.40 
  -2   7   0   -9.00    9.80 
   2   7   0   -3.70   12.90 
   2   7   0    2.60    9.40 
  -2   7   0   -4.60   11.20 
  -2   7   0    2.40   13.10 
   2   7   0    5.70   13.50 
   2   7   0   21.10   15.00 
   2   7   0   22.80   16.70 
   2   7   0   18.30   18.40 
  -2   7   0    4.70   14.20 
  -2   7   0    0.00    9.10 
  -2   7   0    9.60   12.90 
  -2   7   0   18.00   14.40 
  -2   7   0   12.90   15.80 
   2   7   0    0.90   12.60 
   2   7   0    9.70   16.40 
  -2   7   0    5.90   10.60 
   2   7   0   23.80   20.90 
   2   7   0   13.80   17.40 
   2   7   0   19.10   15.90 
  -2   7   0   17.00   15.20 
  -2   7   0    8.00   16.20 
  -2   7   0   16.50   14.20 
   2   7   0   18.20   17.30 
  -2   7   0   -4.00   12.10 
  -2   7   0   15.60   15.70 
  -3  -7   0  459.75   63.79 
  -3  -7   0  249.28   48.20 
   3  -7   0  361.86   44.50 
  -3  -7   0  350.96   73.69 
   3  -7   0  244.18   48.10 
  -3  -7   0  416.86   62.59 
  -3  -7   0  257.17   60.99 
  -3  -7   0  317.47   59.79 
   3  -7   0  467.65   51.09 
  -3  -7   0  494.35   65.19 
   3  -7   0  173.88   49.20 
  -3  -7   0  268.47   48.00 
  -3  -7   0  358.06   57.39 
   3  -7   0  332.17   48.20 
   3  -7   0  258.47   62.59 
  -3   7   0  401.76   52.49 
  -3   7   0  319.47   46.20 
  -3   7   0  454.15   67.89 
   3   7   0  399.66   56.79 
   3   7   0  406.96   63.19 
   3   7   0  245.68   45.40 
  -3   7   0  325.57   51.89 
   3   7   0  308.37   58.29 
  -3   7   0  382.76   62.59 
   3   7   0  287.07   50.69 
  -3   7   0  404.06   52.39 
   3   7   0  315.47   44.40 
   3   7   0  408.16   45.40 
   3   7   0  320.67   61.19 
   3   7   0  297.77   53.19 
  -3   7   0  350.86   45.70 
   3   7   0  380.76   53.29 
   3   7   0  334.87   53.79 
   3   7   0  269.87   45.20 
   3   7   0  326.47   47.90 
   3   7   0  318.17   40.60 
  -3   7   0  391.36   54.29 
   4  -7   0  224.58   47.70 
  -4  -7   0  188.78   42.60 
   4  -7   0  320.37   61.69 
  -4  -7   0  301.17   65.39 
  -4  -7   0  192.88   46.10 
   4  -7   0  249.97   42.20 
   4  -7   0  297.17   42.60 
  -4  -7   0  220.18   45.20 
  -4  -7   0  305.17   57.29 
  -4  -7   0  293.47   67.89 
   4  -7   0  288.57   53.99 
  -4  -7   0  209.88   43.40 
  -4  -7   0  197.08   45.20 
   4  -7   0  273.87   44.00 
  -4  -7   0  197.28   46.60 
   4   7   0  243.58   46.10 
   4   7   0  220.48   44.50 
   4   7   0  372.86   62.99 
  -4   7   0  257.27   50.09 
   4   7   0  286.67   50.29 
  -4   7   0  155.18   36.20 
  -4   7   0  226.88   45.20 
   4   7   0  235.38   47.20 
  -4   7   0  276.07   48.20 
   4   7   0  264.47   47.90 
   4   7   0  244.98   45.20 
   4   7   0  249.97   51.29 
  -4   7   0  297.47   40.40 
  -4   7   0  163.78   42.20 
   4   7   0  239.78   39.60 
   4   7   0  337.17   52.29 
  -4   7   0  277.27   43.70 
   4   7   0  261.57   54.99 
  -4   7   0  242.88   40.70 
  -4   7   0  211.18   44.80 
   4   7   0  185.18   44.80 
  -5  -7   0  820.92   93.29 
  -5  -7   0  591.34   94.09 
  -5  -7   0  730.83  102.59 
  -5  -7   0  651.33   77.79 
  -5  -7   0  847.92   94.49 
  -5  -7   0  715.53   92.29 
  -5  -7   0  949.71  102.39 
  -5  -7   0  668.83   86.69 
  -5  -7   0  803.92   93.69 
   5  -7   0  774.52   88.09 
  -5  -7   0  708.83   92.09 
   5   7   0  748.23   85.49 
   5   7   0  966.50  109.79 
   5   7   0  975.60   99.89 
   5   7   0  736.93   93.09 
   5   7   0  695.93   86.39 
   5   7   0  737.93   79.09 
   5   7   0  637.54   69.19 
   5   7   0  878.31   96.09 
   5   7   0 1059.09  115.99 
   5   7   0  905.31   89.19 
   5   7   0  874.91   94.09 
  -5   7   0  994.30   99.09 
  -5   7   0  837.32   97.79 
  -5   7   0  813.32  101.69 
  -5   7   0  798.22   85.59 
   5   7   0  716.43   89.09 
  -6  -7   0  853.21  119.39 
  -6  -7   0  808.72   98.29 
  -6  -7   0  771.82   94.79 
  -6  -7   0  876.91  103.59 
  -6  -7   0  842.52   99.19 
  -6  -7   0 1012.70  131.19 
  -6  -7   0  739.63   76.49 
  -6  -7   0 1074.59  121.69 
  -6  -7   0  768.52   96.39 
  -6  -7   0  838.62  109.29 
  -6   7   0  998.40  100.39 
  -6   7   0  436.66   75.29 
  -6   7   0  665.83   90.79 
   6   7   0  919.31  109.89 
   6   7   0  765.92   82.09 
   6   7   0  851.41  102.49 
   6   7   0  771.52   92.29 
   6   7   0  795.72   93.69 
   6   7   0  638.54   85.39 
   6   7   0  776.02   92.79 
   6   7   0  840.82  105.09 
   6   7   0  772.92   97.09 
   6   7   0  878.11  101.09 
   6   7   0  785.92  103.99 
  -6   7   0  838.92   88.49 
   6   7   0  848.72  107.09 
   6   7   0  856.11   87.69 
  -7  -7   0 1016.40  137.49 
  -7  -7   0  766.72  102.59 
  -7  -7   0  791.12  116.89 
  -7  -7   0  870.81  103.19 
  -7  -7   0  709.83   97.99 
  -7  -7   0  914.81  106.09 
  -7  -7   0  652.93  117.09 
  -7  -7   0  828.12  112.79 
  -7  -7   0  914.61  108.79 
  -7  -7   0  799.02  106.89 
  -7   7   0  850.01  112.09 
   7   7   0  606.74   93.59 
  -7   7   0  845.12  108.09 
   7   7   0  678.23   98.89 
   7   7   0  826.52   97.39 
   7   7   0  917.61  111.79 
   7   7   0 1016.90  115.59 
   7   7   0  609.24   86.19 
   7   7   0  800.72  110.59 
   7   7   0  772.72   95.69 
   7   7   0  588.04   87.19 
   7   7   0  745.13  103.99 
   7   7   0  750.42   88.29 
   0  -8   0 2529.85  149.09 
   0  -8   0 2379.76  137.29 
   0  -8   0 2658.93  142.59 
   0  -8   0 2658.93  138.39 
   0  -8   0 2659.33  183.78 
   0  -8   0 2264.77  143.89 
   0  -8   0 2664.53  148.29 
   0  -8   0 2613.54  149.49 
   0  -8   0 2210.08  134.99 
   0  -8   0 2394.26  144.49 
   0  -8   0 2420.36  118.19 
   0   8   0 2269.47  132.39 
   0   8   0 2388.86  130.69 
   0   8   0 2510.15  131.89 
   0   8   0 2501.85  121.99 
   0   8   0 2265.67  113.09 
   0   8   0 2474.55  115.69 
   0   8   0 2595.14  122.19 
   0   8   0 2541.45  142.29 
   0   8   0 2710.83  141.09 
   0   8   0 2660.93  135.79 
   0   8   0 2539.15  116.49 
   0   8   0 2482.65  119.49 
   0   8   0 2170.28  126.79 
   0   8   0 2436.26  140.19 
   0   8   0 2397.16  139.09 
  -1  -8   0  571.54   76.39 
   1  -8   0  542.55   69.29 
  -1  -8   0  582.44   77.09 
  -1  -8   0  441.26   70.79 
  -1  -8   0  614.74   85.59 
   1  -8   0  520.25   78.59 
  -1  -8   0  602.14   83.99 
   1  -8   0  522.95   72.19 
  -1  -8   0  512.95   62.39 
   1  -8   0  429.96   66.19 
  -1  -8   0  527.65   70.89 
  -1  -8   0  511.05   70.09 
   1  -8   0  360.66   56.29 
   1  -8   0  430.86   67.89 
  -1  -8   0  612.64   84.19 
  -1  -8   0  480.65   97.89 
  -1  -8   0  436.06   80.79 
  -1  -8   0  329.37   57.09 
  -1   8   0  417.66   48.40 
  -1   8   0  480.15   63.59 
   1   8   0  543.85   72.99 
  -1   8   0  603.64   77.19 
  -1   8   0  475.45   62.29 
   1   8   0  568.44   80.19 
  -1   8   0  567.74   70.19 
   1   8   0  461.45   64.99 
   1   8   0  478.45   58.19 
  -1   8   0  396.36   60.89 
   1   8   0  431.16   51.49 
  -1   8   0  432.76   57.89 
  -1   8   0  530.65   56.59 
   1   8   0  461.45   59.89 
  -1   8   0  392.86   51.29 
   1   8   0  467.55   66.39 
  -1   8   0  524.75   75.19 
  -1   8   0  479.15   68.79 
   1   8   0  462.95   63.79 
   1   8   0  427.56   64.99 
  -1   8   0  498.35   52.79 
  -1   8   0  514.35   58.09 
  -1   8   0  540.55   66.09 
   1   8   0  483.75   60.89 
   1   8   0  508.15   56.69 
   1   8   0  437.76   63.29 
   1   8   0  518.55   70.59 
   2  -8   0  790.52   95.49 
  -2  -8   0  884.61   93.99 
  -2  -8   0  725.53   91.69 
  -2  -8   0  941.91  134.69 
   2  -8   0  887.51  106.79 
  -2  -8   0 1149.69   94.19 
  -2  -8   0  803.92  112.89 
   2  -8   0  979.70  115.89 
  -2  -8   0 1090.99  131.39 
  -2  -8   0 1097.59  114.99 
  -2  -8   0  733.03   88.09 
  -2  -8   0  876.91   93.19 
  -2  -8   0 1149.19   81.39 
  -2  -8   0 1022.10  102.39 
  -2  -8   0  999.80  105.29 
  -2  -8   0 1055.89   88.59 
   2   8   0  987.00   98.59 
   2   8   0 1028.80   72.09 
   2   8   0  924.41   74.09 
  -2   8   0  984.40   73.49 
  -2   8   0 1107.19   75.69 
   2   8   0  924.41   67.79 
   2   8   0 1009.40   83.99 
   2   8   0  985.90   72.29 
   2   8   0  966.70   77.99 
  -2   8   0 1114.29   85.19 
  -2   8   0  992.40   70.19 
  -2   8   0  944.81   73.19 
   2   8   0 1063.69  103.19 
   2   8   0  989.40  104.09 
  -2   8   0 1073.69   74.79 
   2   8   0  766.92   88.39 
   2   8   0  983.60   75.79 
  -2   8   0 1087.39   76.79 
  -2   8   0 1017.10   68.89 
   2   8   0 1047.10  109.49 
  -2   8   0  908.51   96.79 
  -2   8   0  757.82   86.09 
  -2   8   0  836.72   98.69 
   3  -8   0  244.48   62.39 
   3  -8   0  238.88   51.69 
  -3  -8   0  138.69   57.29 
  -3  -8   0  161.18   43.90 
  -3  -8   0  194.68   42.70 
  -3  -8   0  204.58   49.10 
  -3  -8   0  274.27   57.39 
  -3  -8   0  144.19   41.30 
  -3  -8   0  134.59   40.50 
  -3  -8   0  191.08   46.30 
  -3  -8   0  126.09   38.40 
  -3  -8   0  110.59   50.59 
  -3  -8   0  187.88   54.59 
  -3  -8   0  258.67   54.99 
   3  -8   0  226.88   62.79 
   3   8   0  226.48   51.59 
   3   8   0  197.18   40.80 
  -3   8   0  191.48   41.60 
  -3   8   0  157.28   43.00 
  -3   8   0  185.48   38.50 
   3   8   0  136.79   35.70 
   3   8   0  182.48   45.40 
   3   8   0  256.57   56.09 
   3   8   0  249.48   52.89 
  -3   8   0  235.08   49.50 
   3   8   0  227.88   43.20 
   3   8   0  101.19   34.30 
  -3   8   0  233.18   48.50 
  -3   8   0  220.78   38.50 
  -3   8   0  160.48   33.60 
   3   8   0  222.08   50.99 
   3   8   0  184.68   43.70 
   3   8   0  224.28   44.20 
  -3   8   0  228.28   41.50 
  -3   8   0  150.28   32.60 
  -4  -8   0  902.81  102.69 
  -4  -8   0  844.82   93.59 
  -4  -8   0  931.81  109.69 
  -4  -8   0  672.23  108.69 
  -4  -8   0  777.22   94.09 
  -4  -8   0  793.82   93.99 
  -4  -8   0  768.92   92.79 
  -4  -8   0  768.72   89.79 
  -4  -8   0  855.61  122.69 
   4  -8   0  694.33   88.19 
   4   8   0  862.91   91.09 
   4   8   0 1009.80  115.09 
  -4   8   0  697.13   83.59 
   4   8   0  749.42   84.19 
   4   8   0  720.43   86.39 
   4   8   0  670.93   91.69 
   4   8   0  914.31   94.29 
  -4   8   0  680.73   90.99 
   4   8   0  868.91  100.79 
   4   8   0  908.31   94.19 
   4   8   0  639.74   83.09 
   4   8   0  737.53  100.39 
  -4   8   0  723.03   85.49 
   4   8   0  721.03   85.69 
  -5  -8   0  150.78   53.39 
   5  -8   0   29.30   25.80 
  -5  -8   0  120.39   45.00 
  -5  -8   0  147.19   55.69 
  -5  -8   0  118.89   43.70 
  -5  -8   0   36.00   25.80 
  -5  -8   0   93.39   41.40 
  -5  -8   0   57.79   32.90 
  -5  -8   0  137.49   41.30 
  -5  -8   0  165.18   48.10 
  -5   8   0  105.49   38.20 
   5   8   0   47.70   28.70 
   5   8   0  115.99   43.20 
   5   8   0  128.79   41.00 
   5   8   0  101.09   39.60 
   5   8   0   94.19   36.50 
  -5   8   0  114.99   37.00 
   5   8   0  122.49   37.60 
   5   8   0   14.10   21.50 
  -5   8   0  141.89   46.10 
   5   8   0   74.49   30.50 
   5   8   0  101.49   40.40 
  -5   8   0   81.29   36.90 
   5   8   0   67.49   29.00 
   5   8   0   83.39   32.10 
  -6  -8   0  798.62  102.49 
  -6  -8   0  393.86   77.79 
  -6  -8   0  648.34  116.79 
  -6  -8   0  499.05   82.29 
  -6  -8   0  605.74   92.09 
  -6  -8   0  462.85   78.59 
  -6  -8   0  492.45   79.29 
  -6  -8   0  365.06   85.79 
   6   8   0  380.26   72.39 
  -6   8   0  598.64   80.59 
  -6   8   0  495.75   83.39 
   6   8   0  564.04   93.09 
   6   8   0  476.45   78.79 
   6   8   0  450.45   67.19 
   6   8   0  446.66   73.69 
   6   8   0  431.96   75.19 
  -6   8   0  548.65   86.49 
   6   8   0  527.35   88.19 
   6   8   0  432.76   73.19 
  -6   8   0  564.84   81.29 
   6   8   0  381.26   73.49 
   6   8   0  513.15   80.59 
   6   8   0  578.64   87.49 
   0  -9   0    1.00   21.30 
   0  -9   0    2.90   20.90 
   0  -9   0    4.00   18.70 
   0  -9   0   34.40   31.00 
   0  -9   0   -5.40   22.00 
   0  -9   0   12.50   22.80 
   0  -9   0    9.30   18.00 
   0   9   0   19.20   21.30 
   0   9   0    0.40   16.30 
   0   9   0    0.40   16.10 
   0   9   0   -3.60   14.10 
   0   9   0   -4.00   19.20 
   0   9   0   -6.30   14.70 
   0   9   0   -8.40   16.30 
   0   9   0   13.50   18.00 
   0   9   0   27.10   22.80 
  -1  -9   0   25.50   23.50 
   1  -9   0   19.00   22.60 
  -1  -9   0    8.00   23.10 
  -1  -9   0    7.30   19.20 
  -1  -9   0  -11.80   16.60 
   1  -9   0   33.60   26.80 
  -1  -9   0  -11.70   16.80 
  -1  -9   0    0.50   29.00 
  -1  -9   0   10.20   20.10 
  -1  -9   0   27.60   26.10 
   1  -9   0   32.00   22.70 
   1  -9   0    0.10   22.60 
  -1   9   0   27.90   25.10 
   1   9   0    7.60   21.80 
   1   9   0    9.80   17.30 
  -1   9   0   14.10   21.50 
  -1   9   0    6.30   20.70 
  -1   9   0  -19.40   13.40 
   1   9   0   -4.00   17.10 
   1   9   0   11.50   19.60 
  -1   9   0   16.30   18.60 
   1   9   0   35.30   25.70 
   1   9   0   27.50   22.60 
  -1   9   0  -12.10   15.00 
  -1   9   0   13.50   18.80 
  -1   9   0   90.49   34.30 
   1   9   0    3.70   17.70 
  -1   9   0    1.70   15.60 
   1   9   0   25.20   26.10 
   1   9   0   -8.00   15.70 
   1   9   0    5.80   17.50 
  -1   9   0   34.90   23.00 
   1   9   0   -1.20   16.30 
  -2  -9   0    6.70   25.10 
  -2  -9   0   -5.30   20.30 
  -2  -9   0   -2.00   20.00 
  -2  -9   0   51.89   29.10 
  -2  -9   0   10.20   21.10 
  -2  -9   0    2.20   23.70 
  -2  -9   0   -9.30   18.60 
   2  -9   0   22.40   31.70 
  -2  -9   0  -24.70   30.90 
   2  -9   0  -21.60   22.10 
  -2  -9   0   20.10   38.80 
   2  -9   0   25.90   24.00 
   2   9   0   17.70   20.40 
   2   9   0    7.90   15.10 
   2   9   0   15.40   19.50 
   2   9   0    1.10   17.40 
   2   9   0   10.90   19.20 
   2   9   0   26.40   24.30 
   2   9   0   32.30   22.70 
   2   9   0   -7.30   15.60 
  -2   9   0   22.50   20.10 
   2   9   0    9.40   21.10 
  -2   9   0   29.00   24.20 
   2   9   0   20.90   27.90 
  -2   9   0   24.90   20.30 
  -2   9   0    4.50   20.70 
  -2   9   0   22.10   23.80 
  -2   9   0   -2.00   16.40 
  -2   9   0   32.30   26.60 
  -2   9   0    9.00   18.50 
  -3  -9   0  124.09   41.00 
  -3  -9   0  417.26   87.29 
  -3  -9   0  258.17   56.09 
  -3  -9   0  295.47   85.99 
  -3  -9   0  385.76   69.49 
   3  -9   0  245.88   57.49 
  -3  -9   0  348.47   73.89 
  -3  -9   0  249.38   56.09 
  -3  -9   0  138.49   45.10 
  -3  -9   0  258.37   57.99 
  -3  -9   0  151.18   47.60 
   3   9   0  271.37   57.29 
   3   9   0  269.97   60.89 
   3   9   0  233.98   51.49 
  -3   9   0  369.36   72.89 
   3   9   0  123.49   40.10 
  -3   9   0  219.08   49.90 
  -3   9   0  288.47   61.89 
   3   9   0  272.67   62.59 
   3   9   0  252.57   51.89 
  -3   9   0  233.18   53.79 
   3   9   0  307.67   60.69 
   3   9   0  147.89   44.00 
  -3   9   0  220.38   54.29 
  -4  -9   0   31.30   39.60 
  -4  -9   0   -9.00   19.50 
  -4  -9   0  -22.60   21.00 
   4  -9   0  -10.50   21.10 
  -4  -9   0   14.40   32.20 
  -4  -9   0   27.20   31.30 
  -4  -9   0    4.70   25.50 
  -4  -9   0   11.10   23.40 
  -4  -9   0  -31.60   17.00 
  -4  -9   0   -8.00   31.40 
  -4  -9   0   20.00   22.80 
   4   9   0    4.90   21.40 
   4   9   0   -9.20   19.40 
   4   9   0   12.20   20.60 
  -4   9   0   -6.00   17.00 
   4   9   0  -14.40   16.70 
  -4   9   0    0.10   20.10 
   4   9   0   -2.10   17.20 
   4   9   0   14.60   23.70 
   4   9   0    3.70   18.20 
  -4   9   0   14.70   19.30 
   4   9   0   29.90   27.30 
   4   9   0   -7.30   12.90 
  -5  -9   0  951.80  116.79 
  -5  -9   0  889.01  141.39 
   5  -9   0  969.60  117.89 
  -5  -9   0  778.82  110.19 
  -5  -9   0 1170.18  154.98 
  -5  -9   0  827.82  107.49 
  -5  -9   0 1071.69  122.99 
  -5  -9   0  791.12  113.69 
  -5  -9   0  759.22  101.09 
  -5   9   0  723.03  105.29 
   5   9   0  705.33  100.69 
  -5   9   0  900.61  112.49 
   5   9   0 1079.19  108.49 
   5   9   0  993.20  104.29 
   5   9   0  857.21  113.69 
   5   9   0  761.22  101.29 
   5   9   0  869.61  100.39 
   5   9   0  666.83  101.59 
   5   9   0  913.21  117.89 
  -5   9   0  802.72   98.39 
  -5   9   0  997.30  111.19 
   5   9   0  775.72   96.59 
   0 -10   0 1561.34  123.79 
   0 -10   0 1809.62  141.09 
   0 -10   0 1487.65  122.09 
   0  10   0 1738.13  128.29 
   0  10   0 1528.05  116.99 
   0  10   0 1422.26  116.29 
   0  10   0 1569.44  118.19 
   0  10   0 1608.24  115.59 
   0  10   0 1682.03  116.49 
   0  10   0 1530.75  113.39 
   0  10   0 1853.21  134.79 
  -1 -10   0  119.49   47.00 
   1 -10   0  123.09   49.90 
   1 -10   0   80.39   46.30 
  -1 -10   0  211.48   56.09 
  -1 -10   0  112.79   42.40 
  -1 -10   0   53.69   45.40 
  -1 -10   0   98.29   39.60 
  -1 -10   0   64.59   37.40 
  -1 -10   0   49.90   33.20 
   1  10   0   82.29   39.30 
   1  10   0   71.99   35.40 
   1  10   0   65.49   36.60 
  -1  10   0   95.89   44.20 
   1  10   0   77.69   35.40 
   1  10   0   63.19   34.50 
  -1  10   0   65.69   34.10 
   1  10   0   52.09   32.90 
   1  10   0   39.60   31.50 
  -1  10   0   44.70   32.20 
  -1  10   0  152.98   45.90 
   1  10   0   70.09   29.90 
  -1  10   0   65.19   32.50 
  -1  10   0  110.29   45.10 
   1  10   0   74.59   35.20 
  -1  10   0  109.79   35.80 
  -2 -10   0  911.11  120.09 
   2 -10   0  878.11  112.39 
  -2 -10   0  752.42  102.59 
  -2 -10   0  850.01  117.09 
  -2 -10   0  900.11  109.59 
  -2 -10   0  712.03  131.29 
  -2 -10   0 1064.69  118.49 
  -2 -10   0  712.53  101.59 
   2  10   0  849.81  104.69 
   2  10   0  893.61   96.79 
   2  10   0 1014.20  113.99 
   2  10   0  755.42   98.59 
   2  10   0  884.31  115.89 
  -2  10   0  851.31  104.29 
  -2  10   0  863.41  109.29 
  -2  10   0  774.52  109.49 
   2  10   0  793.72  103.79 
   2  10   0 1141.49  135.59 
  -2  10   0  952.40  117.69 
  -2  10   0  932.71  107.09 
   2  10   0  769.22  142.39 
  -3 -10   0  111.99   45.50 
 -10   0   1   18.00   26.00 
 -10   0   1   22.10   22.00 
 -10   0   1   14.00   27.90 
  10   0  -1   -9.60   20.10 
 -10   0   1    0.80   20.00 
  10   0  -1  -10.30   18.10 
  10   0  -1    1.10   25.20 
 -10   0   1   -6.50   26.90 
  10   0  -1  -11.60   19.60 
  10   0  -1    1.70   22.40 
 -10   0   1  -22.50   17.80 
  10   0  -1   -1.30   23.30 
  10   0  -1   20.30   26.00 
 -10   0   1   23.60   30.50 
 -10   0   1   -3.90   20.30 
 -10   0   1   -0.10   26.80 
  10   0  -1   -7.70   23.20 
   9   0  -1 1291.17  128.29 
   9   0  -1 1322.17  132.19 
  -9   0   1 1442.06  103.99 
  -9   0   1 1306.67  114.19 
  -9   0   1 1209.88  110.49 
  -9   0   1 1336.17   97.59 
  -9   0   1 1110.79   80.69 
   9   0  -1 1392.66  103.89 
   9   0  -1 1183.08   95.69 
   9   0  -1 1233.88  125.19 
  -9   0   1 1203.68   87.89 
   9   0  -1 1178.08   98.59 
   9   0  -1 1412.06  134.99 
  -9   0   1 1374.96  108.19 
  -9   0   1 1221.08  107.79 
  -9   0   1 1097.89  109.09 
   9   0  -1 1354.36  110.99 
   8   0  -1    3.00   15.50 
   8   0  -1    2.10   15.90 
   8   0  -1    6.50   16.70 
  -8   0   1    5.70   15.80 
   8   0  -1    4.00   16.60 
  -8   0   1  -18.80   15.00 
  -8   0   1   -3.10   13.70 
  -8   0   1   15.00   14.40 
  -8   0   1   -1.30   17.80 
  -8   0   1   -3.20   12.10 
   8   0  -1   21.80   21.80 
  -8   0   1   26.80   22.50 
   8   0  -1   10.90   18.60 
   8   0  -1   10.90   16.60 
  -8   0   1  -15.80   11.80 
   8   0  -1    5.30   18.30 
   8   0  -1   15.40   19.40 
   8   0  -1   -1.00   14.20 
  -8   0   1    0.90   12.70 
  -8   0   1   14.30   21.80 
   8   0  -1    4.30   15.70 
  -8   0   1   -2.50   10.40 
   7   0  -1 1743.83  104.79 
  -7   0   1 1931.81  112.49 
  -7   0   1 1821.92   83.89 
  -7   0   1 1644.34   87.49 
   7   0  -1 1801.82  108.59 
   7   0  -1 1726.43   93.29 
  -7   0   1 1627.54   99.09 
   7   0  -1 1646.74  107.89 
  -7   0   1 1704.73   80.99 
  -7   0   1 1868.61   90.59 
   7   0  -1 1933.51   86.79 
   7   0  -1 1805.52  102.79 
  -7   0   1 1722.43   94.59 
  -7   0   1 1636.14  112.69 
   7   0  -1 1899.71   95.59 
   7   0  -1 1722.93   96.19 
   7   0  -1 1838.42  107.99 
   7   0  -1 1664.93  103.89 
  -7   0   1 1649.23   90.59 
  -7   0   1 1677.93   83.79 
  -7   0   1 1819.52  101.79 
   7   0  -1 1800.72   80.09 
   7   0  -1 1646.74  106.29 
  -7   0   1 1758.02  113.59 
  -7   0   1 1804.02  103.79 
  -7   0   1 1726.73  114.59 
   7   0  -1 1866.31  113.59 
   6   0  -1   -4.40   10.50 
   6   0  -1    1.10   10.80 
   6   0  -1  -13.30    8.60 
  -6   0   1   -7.00   12.20 
  -6   0   1   -0.80    9.00 
  -6   0   1   -1.00    6.60 
   6   0  -1    0.20    7.80 
  -6   0   1    7.80    9.80 
   6   0  -1    1.70    6.60 
  -6   0   1   -5.60    8.30 
  -6   0   1   -2.30    6.40 
  -6   0   1    6.20    9.90 
  -6   0   1    4.20    7.70 
   6   0  -1   -7.90    8.90 
  -6   0   1   -2.40    9.90 
  -6   0   1   -1.40    9.50 
   6   0  -1   21.20   14.00 
   6   0  -1    2.20   12.10 
   6   0  -1    0.50    9.00 
   6   0  -1   21.90   15.00 
  -6   0   1   14.00   14.40 
   6   0  -1    2.50   11.00 
  -6   0   1   -4.60   12.00 
  -6   0   1   -5.20    7.20 
   6   0  -1    0.60   10.90 
   6   0  -1    9.20   11.00 
   5   0  -1 1755.52   95.29 
   5   0  -1 1696.43   79.39 
  -5   0   1 1795.12   72.69 
  -5   0   1 1766.52   73.29 
  -5   0   1 1696.53   97.59 
   5   0  -1 1819.72   73.59 
  -5   0   1 1558.44   88.59 
  -5   0   1 1746.53   79.49 
  -5   0   1 1697.43   76.29 
   5   0  -1 1758.42   95.09 
  -5   0   1 1725.13   86.19 
  -5   0   1 1746.93   78.89 
   5   0  -1 1704.43   92.09 
   5   0  -1 1788.92   78.49 
  -5   0   1 1741.93   81.39 
  -5   0   1 1754.02   97.59 
   5   0  -1 1773.02   89.39 
  -5   0   1 1854.21   77.29 
   5   0  -1 1593.74   79.99 
   5   0  -1 1837.42   85.49 
  -5   0   1 1840.32   98.79 
  -5   0   1 1907.81   90.79 
   5   0  -1 1739.23   93.39 
  -5   0   1 1623.34   81.79 
   5   0  -1 1907.41   90.39 
   5   0  -1 1875.11   92.49 
   5   0  -1 1972.40   95.99 
   5   0  -1 1791.12   87.79 
  -4   0   1    2.70    9.50 
   4   0  -1   -4.30    7.50 
   4   0  -1    1.10    6.80 
   4   0  -1    4.10    7.70 
  -4   0   1    2.30    5.30 
   4   0  -1  -14.40    7.00 
   4   0  -1   -7.30    6.40 
   4   0  -1   17.50   10.50 
   4   0  -1    0.70    2.50 
   4   0  -1   -4.10    4.50 
  -4   0   1   -0.10    6.80 
  -4   0   1   12.20    7.90 
   4   0  -1   -3.00    6.40 
  -4   0   1   -0.80   11.20 
  -4   0   1   -2.90    7.00 
  -4   0   1   -3.50    8.70 
  -4   0   1    8.70    7.70 
   4   0  -1   -0.40    7.40 
   4   0  -1   -4.30    6.00 
   4   0  -1   -6.20    9.20 
   4   0  -1   -6.20    7.40 
   4   0  -1    4.50    7.30 
  -4   0   1   -4.20    5.10 
   4   0  -1   10.60   10.30 
  -4   0   1    4.10    6.40 
  -4   0   1    1.90    6.70 
  -4   0   1    1.20    6.60 
   4   0  -1    3.50    7.60 
   4   0  -1   -7.70    8.50 
  -4   0   1   -0.10    8.10 
  -4   0   1    2.10   11.40 
   4   0  -1   -0.50    8.70 
   4   0  -1   -4.40    6.90 
  -4   0   1   -1.10    6.10 
  -4   0   1    5.50    6.30 
  -3   0   1  901.41   44.40 
  -3   0   1  903.81   37.90 
   3   0  -1  887.41   48.50 
  -3   0   1  889.51   45.10 
  -3   0   1  868.81   44.20 
  -3   0   1  980.90   38.40 
   3   0  -1  925.21   45.10 
   3   0  -1  933.31   50.19 
  -3   0   1  931.61   45.10 
  -3   0   1 1016.80   48.90 
   3   0  -1  877.31   42.10 
  -3   0   1  953.50   45.00 
  -3   0   1  883.41   46.70 
  -3   0   1  898.51   42.00 
   3   0  -1  973.50   46.00 
  -3   0   1  910.61   41.10 
  -3   0   1  821.92   47.90 
   3   0  -1  927.01   50.39 
   3   0  -1  917.01   50.69 
  -3   0   1  900.81   46.10 
  -3   0   1  902.21   52.59 
   3   0  -1  976.90   47.80 
  -3   0   1  979.20   45.30 
   3   0  -1  866.11   43.70 
  -3   0   1  921.81   49.20 
  -3   0   1  925.31   38.60 
   3   0  -1  811.82   45.20 
  -3   0   1 1018.50   43.20 
   3   0  -1  818.52   44.00 
  -3   0   1  862.61   49.10 
   3   0  -1  882.01   44.90 
   3   0  -1  861.81   48.10 
   3   0  -1  904.71   49.90 
  -3   0   1  843.92   48.30 
   3   0  -1  886.71   38.10 
  -3   0   1  836.12   45.20 
  -3   0   1  852.11   47.40 
   3   0  -1  901.81   50.79 
  -3   0   1  974.50   48.50 
   3   0  -1  822.42   49.60 
   3   0  -1  935.01   47.50 
   3   0  -1  856.81   41.20 
   3   0  -1  902.41   32.90 
   2   0  -1    1.20    4.40 
  -2   0   1    0.40    5.60 
   2   0  -1    4.40    4.30 
  -2   0   1    5.70    4.50 
  -2   0   1    7.70    3.40 
   2   0  -1    8.80    5.90 
  -2   0   1   12.80    6.20 
  -2   0   1   11.50    4.20 
   2   0  -1    6.10    5.50 
  -2   0   1   -0.90    2.80 
   2   0  -1    6.40    5.50 
   2   0  -1   14.60    5.80 
  -2   0   1   19.40    8.30 
  -2   0   1   15.40    7.80 
   2   0  -1    3.30    4.50 
  -2   0   1    0.30    4.10 
   2   0  -1   13.70    6.00 
   2   0  -1   13.90    5.60 
   2   0  -1   12.20    6.80 
  -2   0   1    2.90    5.60 
   2   0  -1   -0.20    4.50 
  -2   0   1    4.50    4.90 
  -2   0   1    5.60    2.60 
   2   0  -1    3.80    2.40 
   2   0  -1    1.20    5.80 
  -2   0   1    1.00    4.80 
  -2   0   1   10.10    6.10 
  -2   0   1   13.30    6.80 
   2   0  -1   14.60    7.00 
  -2   0   1    7.30    5.20 
  -2   0   1    3.10    6.10 
  -2   0   1    7.60    4.60 
  -2   0   1   -4.60    3.50 
   2   0  -1    3.00    5.00 
  -2   0   1    1.20    4.60 
   2   0  -1   17.10    6.40 
  -2   0   1   -1.50    4.70 
  -2   0   1   11.10    6.30 
  -2   0   1   14.30    7.90 
   2   0  -1    4.10    5.70 
  -2   0   1    4.50    4.00 
  -2   0   1   18.00    6.90 
   2   0  -1   17.70    5.70 
  -2   0   1   13.60    6.40 
   2   0  -1    2.60    6.70 
  -2   0   1   19.50    6.80 
  -2   0   1    7.20    2.80 
   2   0  -1    4.50    3.20 
   2   0  -1   10.50    4.90 
   2   0  -1    5.90    5.40 
  -2   0   1    5.80    2.40 
   2   0  -1    0.20    5.40 
  -2   0   1    1.30    5.30 
  -2   0   1    4.80    5.00 
  -1   0   1  182.28   11.40 
  -1   0   1  170.18   11.60 
  -1   0   1  197.88   11.20 
  -1   0   1  189.18    9.50 
   1   0  -1  128.39   11.20 
  -1   0   1  153.18   11.30 
  -1   0   1  170.38   12.60 
  -1   0   1  164.88   12.20 
  -1   0   1  202.68    9.50 
  -1   0   1  187.58    9.70 
  -1   0   1  198.88   11.10 
  -1   0   1  145.49   11.50 
  -1   0   1  191.28   10.40 
   1   0  -1  142.69   11.30 
  -1   0   1  188.68   12.30 
  -1   0   1  176.58   10.90 
  -1   0   1  211.28   12.80 
  -1   0   1  187.58   12.70 
  -1   0   1  195.28   11.20 
  -1   0   1  115.19   10.30 
  -1   0   1  182.28   12.10 
   0   0  -1    0.20    0.70 
   0   0   1    1.10    1.80 
   0   0  -1   -0.50    1.20 
   0   0   1    0.00    0.80 
   0   0  -1    0.30    0.70 
   1   0   1 2099.89   75.29 
  -1   0  -1 2219.68   74.59 
  -1   0  -1 2223.48   68.19 
  -1   0  -1 2202.88   69.19 
  -1   0  -1 2319.97   69.39 
  -1   0  -1 2230.68   72.59 
  -1   0  -1 2261.57   68.99 
   1   0   1 2114.59   74.59 
  -1   0  -1 2230.98   73.99 
  -1   0  -1 2348.97   72.39 
  -1   0  -1 2264.57   73.99 
   1   0   1 1857.91   74.09 
  -1   0  -1 2236.88   70.09 
  -1   0  -1 2247.38   74.69 
  -1   0  -1 2247.68   68.09 
   1   0   1 2222.58   75.79 
  -1   0  -1 2209.28   73.39 
  -1   0  -1 2176.58   75.49 
  -1   0  -1 2288.27   71.99 
  -1   0  -1 2257.57   74.29 
  -1   0  -1 2206.08   72.59 
   1   0   1 2305.77   77.49 
  -1   0  -1 2220.58   69.49 
  -1   0  -1 2284.27   74.29 
  -1   0  -1 1829.22   74.19 
   2   0   1    8.10    7.20 
   2   0   1    4.10    5.60 
   2   0   1   -0.80    1.90 
   2   0   1    2.90    5.20 
   2   0   1   -5.90    4.10 
   2   0   1    7.90    5.30 
   2   0   1    5.50    5.60 
  -2   0  -1    4.20    5.10 
  -2   0  -1    0.50    2.80 
   2   0   1   -2.30    4.10 
  -2   0  -1    2.40    2.80 
  -2   0  -1    4.50    4.10 
   2   0   1    0.80    4.70 
  -2   0  -1   -0.90    3.30 
  -2   0  -1    1.40    4.40 
  -2   0  -1   -0.70    6.00 
  -2   0  -1    2.70    4.70 
   2   0   1   -2.60    3.00 
  -2   0  -1    8.40    6.30 
   2   0   1    1.40    4.50 
  -2   0  -1   -7.90    3.50 
   2   0   1    2.90    2.20 
  -2   0  -1    6.30    5.40 
  -2   0  -1   -4.80    2.50 
  -2   0  -1   -1.20    6.40 
   2   0   1    7.20    4.40 
  -2   0  -1    1.80    5.20 
   2   0   1    5.50    5.60 
   2   0   1    5.30    6.60 
  -2   0  -1    0.70    5.70 
  -2   0  -1   -0.50    3.90 
  -2   0  -1    0.00    4.00 
   2   0   1    2.50    3.20 
  -2   0  -1    0.10    4.20 
   2   0   1    3.30    4.90 
  -2   0  -1    1.10    5.40 
   2   0   1   -6.00    3.90 
  -2   0  -1    4.80    6.20 
   2   0   1   -1.10    2.30 
  -2   0  -1    2.50    5.60 
  -2   0  -1    1.10    5.70 
   2   0   1   -9.70    3.50 
   2   0   1    0.10    4.40 
  -2   0  -1    6.30    5.40 
  -2   0  -1    1.90    3.40 
   2   0   1   -0.60    4.70 
   2   0   1   -3.60    4.00 
   2   0   1    4.40    6.20 
  -2   0  -1    5.00    2.50 
   2   0   1    5.00    5.20 
  -2   0  -1    5.40    3.70 
  -2   0  -1    4.70    7.30 
   2   0   1    5.60    6.30 
  -2   0  -1    1.30    6.80 
   2   0   1    6.40    3.10 
  -2   0  -1    2.20    5.30 
  -2   0  -1    1.90    5.70 
  -3   0  -1 2194.98   91.79 
   3   0   1 2059.69   89.69 
   3   0   1 2171.48   79.79 
   3   0   1 2158.48   88.39 
   3   0   1 2173.58   83.59 
  -3   0  -1 2176.58   83.19 
   3   0   1 2127.79   72.29 
   3   0   1 2170.98   78.49 
  -3   0  -1 2116.59   76.59 
   3   0   1 2132.99   76.99 
  -3   0  -1 2160.08   91.39 
   3   0   1 2116.99   89.79 
  -3   0  -1 2050.79   92.39 
   3   0   1 2155.88   83.99 
  -3   0  -1 2172.08   75.69 
  -3   0  -1 2188.08   73.29 
  -3   0  -1 2172.28   86.89 
   3   0   1 2060.99   89.39 
   3   0   1 2006.40   89.99 
   3   0   1 2119.39   94.29 
  -3   0  -1 2220.28   89.39 
   3   0   1 2218.58   87.49 
  -3   0  -1 2158.38   74.09 
   3   0   1 2066.39   90.99 
   3   0   1 2098.99   89.49 
  -3   0  -1 2132.09   79.19 
  -3   0  -1 1950.80   88.29 
  -3   0  -1 2136.49   89.49 
   3   0   1 2118.89   66.29 
   3   0   1 2176.18   87.59 
  -3   0  -1 2211.38   83.19 
  -3   0  -1 2052.49   87.19 
  -3   0  -1 2066.49   92.69 
  -3   0  -1 2126.09   89.39 
  -3   0  -1 2126.69   76.19 
   3   0   1 2197.58   85.39 
   3   0   1 1920.41   83.09 
  -3   0  -1 2060.69   67.39 
  -3   0  -1 2183.08   84.49 
  -3   0  -1 2199.68   83.69 
  -3   0  -1 2069.39   77.29 
   3   0   1 2241.08   89.69 
   3   0   1 2185.48   88.69 
  -3   0  -1 2059.09   86.59 
  -3   0  -1 2069.89   82.59 
  -3   0  -1 2123.09   92.89 
   4   0   1    5.20    5.70 
  -4   0  -1    8.10    7.60 
   4   0   1    0.20    8.00 
  -4   0  -1   -0.70    6.20 
   4   0   1    3.10    7.30 
   4   0   1    0.30    6.60 
   4   0   1  -10.30    5.70 
  -4   0  -1   -1.00    7.10 
   4   0   1    0.20    9.00 
   4   0   1   -0.60    6.80 
  -4   0  -1    3.50    5.40 
   4   0   1   -4.20    6.70 
   4   0   1   18.50   15.20 
  -4   0  -1   -4.20    4.30 
   4   0   1   11.50   11.90 
  -4   0  -1   10.10   11.70 
   4   0   1   -6.20    6.90 
   4   0   1   18.90   11.70 
  -4   0  -1    2.90    6.10 
   4   0   1   10.20   10.50 
  -4   0  -1   -0.60   10.90 
   4   0   1    4.40    6.80 
   4   0   1   -6.50    5.20 
  -4   0  -1    9.30    9.50 
  -4   0  -1   -9.20    4.90 
  -4   0  -1    3.40    6.20 
  -4   0  -1   11.60   13.00 
  -4   0  -1    3.10   10.30 
   4   0   1    5.50    6.10 
   4   0   1   11.70    9.70 
  -4   0  -1    3.60    5.60 
  -4   0  -1   13.80    8.80 
   4   0   1    8.40   10.80 
  -4   0  -1   -8.50    5.90 
   5   0   1 2052.69  102.19 
   5   0   1 1969.90  108.79 
  -5   0  -1 1977.20   87.59 
  -5   0  -1 1919.91  106.69 
  -5   0  -1 2083.69  101.69 
   5   0   1 2170.58   88.59 
   5   0   1 1922.41  103.99 
  -5   0  -1 2117.49   85.09 
   5   0   1 1942.41  102.39 
  -5   0  -1 2091.39   82.79 
   5   0   1 2071.09   94.79 
  -5   0  -1 2093.59   82.99 
   5   0   1 2042.50  100.29 
   5   0   1 2110.49   86.79 
   5   0   1 1977.60  100.49 
  -5   0  -1 2108.89   93.69 
   5   0   1 2023.80   89.59 
  -5   0  -1 2004.10   93.19 
  -5   0  -1 2020.50  105.69 
   5   0   1 2016.40   99.99 
   5   0   1 1905.21  103.49 
  -5   0  -1 1821.42  100.59 
   5   0   1 2114.79   77.69 
  -5   0  -1 2029.50   82.49 
   5   0   1 2114.59  101.09 
   5   0   1 2021.60   94.89 
  -5   0  -1 2082.99  109.59 
   5   0   1 2024.70  104.49 
  -5   0  -1 2069.89   78.79 
   6   0   1    5.20   12.50 
   6   0   1    0.40    8.90 
  -6   0  -1   -2.20    7.30 
   6   0   1   -5.30    5.80 
  -6   0  -1    3.10   11.80 
  -6   0  -1    6.10    7.90 
   6   0   1    4.10   12.10 
   6   0   1    0.90    8.40 
  -6   0  -1    6.40   10.80 
   6   0   1    5.30   13.60 
   6   0   1    3.00    8.60 
  -6   0  -1   -8.70   12.90 
   6   0   1   -9.50   10.50 
  -6   0  -1   12.80   13.80 
   6   0   1  -10.20    9.20 
   6   0   1   -1.10    9.00 
   6   0   1    0.10    9.20 
   6   0   1    4.30   10.90 
  -6   0  -1   -0.70    8.20 
  -6   0  -1   -7.40    9.00 
   6   0   1   -9.30   10.70 
  -6   0  -1   -0.30    7.70 
   6   0   1   -3.50   10.40 
  -6   0  -1    2.70    9.70 
   6   0   1   -5.70    9.10 
  -6   0  -1    5.60   13.40 
   6   0   1   15.70   14.30 
  -6   0  -1   -1.20    6.90 
  -6   0  -1    4.30    9.10 
  -6   0  -1   -7.50   11.40 
  -7   0  -1 3502.75  151.78 
  -7   0  -1 3380.86  132.69 
  -7   0  -1 3815.32  163.98 
  -7   0  -1 3238.88  174.28 
   7   0   1 3649.73  165.28 
  -7   0  -1 3591.94  138.39 
  -7   0  -1 3537.75  138.49 
  -7   0  -1 3655.23  153.18 
  -7   0  -1 3538.95  145.49 
   7   0   1 3787.52  159.28 
  -7   0  -1 3088.09  166.38 
   7   0   1 3592.04  171.48 
   7   0   1 3376.46  165.38 
   7   0   1 3576.24  173.98 
   7   0   1 3589.54  165.78 
   7   0   1 3686.13  175.38 
   7   0   1 3308.97  170.28 
  -7   0  -1 3397.56  163.58 
  -7   0  -1 3514.75  135.69 
   7   0   1 3675.23  168.48 
   7   0   1 3418.66  143.19 
   7   0   1 3594.44  165.48 
   7   0   1 3485.35  142.39 
  -7   0  -1 3601.34  179.38 
  -7   0  -1 3649.63  171.98 
   7   0   1 3468.75  125.69 
   7   0   1 3549.45  155.08 
   8   0   1   -7.50   12.30 
  -8   0  -1   -0.60   16.30 
   8   0   1  -16.60   12.80 
   8   0   1   -3.90   14.70 
   8   0   1    9.60   17.70 
   8   0   1   -8.50   13.10 
   8   0   1   -7.80   13.60 
  -8   0  -1   19.70   17.70 
   8   0   1   -4.00   17.40 
   8   0   1   -6.10   17.80 
   8   0   1    0.80   12.20 
  -8   0  -1   -2.80   16.90 
   8   0   1   14.50   19.70 
  -8   0  -1   -9.30   11.70 
   8   0   1   -4.90   14.00 
  -8   0  -1   -0.80   12.00 
  -8   0  -1   -9.90   15.60 
  -8   0  -1   17.10   21.00 
  -8   0  -1  -10.70   17.60 
  -8   0  -1   -4.20   12.80 
   8   0   1   -4.40   15.40 
  -8   0  -1    6.30   14.70 
  -9   0  -1 1739.63  129.49 
  -9   0  -1 2129.69  148.49 
   9   0   1 2021.80  140.29 
  -9   0  -1 2033.40  130.69 
  -9   0  -1 2073.29  118.99 
   9   0   1 2140.89  133.39 
   9   0   1 1822.22  128.19 
   9   0   1 1957.40  137.69 
   9   0   1 2089.29  122.29 
  -9   0  -1 1874.01  141.59 
  -9   0  -1 2136.79  130.29 
  -9   0  -1 2093.79  115.89 
  -9   0  -1 1951.70  141.09 
   9   0   1 2063.69  130.19 
  -9   0  -1 1917.91  127.39 
   9   0   1 2028.40  137.69 
  -9   0  -1 2011.40  139.39 
   9   0   1 1786.62  126.89 
 -10   0  -1    1.60   26.30 
 -10   0  -1   -9.30   29.80 
 -10   0  -1   29.50   30.30 
 -10   0  -1   33.90   32.20 
  10   0   1    8.30   26.00 
 -10   0  -1   -3.00   19.00 
  10   0   1   19.40   26.40 
  10   0   1   -4.70   26.40 
  10   0   1    5.80   24.80 
 -10   0  -1   -2.80   24.50 
 -10   0  -1    5.10   22.80 
  10   0   1  -25.90   21.10 
 -10   0  -1   25.20   28.20 
  10   0   1    2.20   25.70 
  10   0   1    0.40   22.30 
  10  -1  -1   13.50   25.00 
  10  -1  -1  -14.70   16.90 
 -10  -1   1   -4.70   22.30 
 -10  -1   1    7.00   20.70 
  10  -1  -1   10.00   26.90 
  10  -1  -1   19.40   21.70 
 -10  -1   1   11.90   22.10 
 -10  -1   1  -17.20   22.20 
  10  -1  -1    5.30   21.10 
 -10  -1   1   34.90   31.80 
  10  -1  -1   29.10   27.50 
  10  -1  -1  -14.50   17.20 
 -10  -1   1   -2.20   21.60 
 -10  -1   1  -24.30   15.00 
 -10  -1   1  -13.40   19.40 
 -10  -1   1   17.00   27.30 
  10   1  -1    7.40   26.10 
  10   1  -1    1.10   20.30 
 -10   1   1    0.00   21.50 
 -10   1   1   14.60   21.60 
 -10   1   1    1.50   20.20 
 -10   1   1   16.90   33.90 
  10   1  -1   -7.20   21.00 
 -10   1   1    8.90   22.30 
 -10   1   1  -14.60   15.60 
 -10   1   1  -11.30   24.10 
 -10   1   1   19.50   28.10 
 -10   1   1   -3.10   26.00 
  10   1  -1   14.80   28.80 
  10   1  -1    7.70   20.50 
  10   1  -1   10.30   24.10 
  10   1  -1    9.40   27.60 
  10   1  -1   23.70   25.30 
   9  -1  -1   23.60   25.30 
   9  -1  -1  -14.10   15.80 
  -9  -1   1   -3.20   16.10 
  -9  -1   1   -5.70   15.10 
   9  -1  -1   -6.20   17.90 
  -9  -1   1    7.10   24.90 
   9  -1  -1  -12.30   14.10 
  -9  -1   1   18.50   20.70 
  -9  -1   1    2.30   23.30 
   9  -1  -1   20.80   23.20 
   9  -1  -1   19.90   22.70 
  -9  -1   1  -11.10   16.40 
   9  -1  -1  -12.60   19.10 
   9  -1  -1   -2.50   17.70 
  -9  -1   1   20.50   21.30 
  -9  -1   1   15.70   22.10 
  -9  -1   1    8.70   17.80 
  -9  -1   1   20.40   21.40 
  -9   1   1    6.20   18.10 
  -9   1   1    8.90   20.30 
   9   1  -1   26.10   23.00 
  -9   1   1   13.40   24.20 
   9   1  -1   -7.20   19.80 
  -9   1   1   22.20   26.30 
  -9   1   1   11.90   17.10 
   9   1  -1   18.10   20.80 
  -9   1   1    9.20   16.40 
  -9   1   1    6.50   17.00 
  -9   1   1  -13.40   14.40 
  -9   1   1  -10.50   17.40 
   9   1  -1  -23.80   15.20 
   9   1  -1    7.80   18.70 
   9   1  -1    6.90   22.70 
   9   1  -1    5.10   21.60 
   9   1  -1    1.40   15.30 
  -9   1   1   31.70   27.00 
   8  -1  -1  246.18   51.39 
   8  -1  -1  189.58   40.40 
  -8  -1   1  255.07   47.40 
   8  -1  -1  199.08   46.80 
   8  -1  -1  251.17   53.49 
   8  -1  -1  195.18   45.10 
  -8  -1   1  209.98   46.10 
  -8  -1   1  190.98   37.00 
   8  -1  -1  175.78   45.10 
  -8  -1   1  173.38   49.50 
  -8  -1   1  250.07   61.79 
  -8  -1   1  269.57   44.70 
   8  -1  -1  194.18   44.70 
  -8  -1   1  207.88   39.70 
  -8  -1   1  185.48   42.20 
  -8  -1   1  228.28   45.20 
   8  -1  -1  203.28   45.50 
  -8  -1   1  203.48   46.80 
  -8  -1   1  258.77   48.20 
   8   1  -1  130.19   38.50 
   8   1  -1  224.28   45.60 
   8   1  -1  220.08   42.20 
  -8   1   1  138.69   39.10 
  -8   1   1  167.28   31.10 
   8   1  -1  250.77   52.29 
  -8   1   1  178.38   39.60 
  -8   1   1  143.19   30.40 
  -8   1   1  172.28   37.80 
  -8   1   1  169.38   46.00 
  -8   1   1  203.38   35.20 
   8   1  -1  217.48   47.30 
   8   1  -1  210.18   46.10 
  -8   1   1  195.78   35.30 
  -8   1   1  181.68   37.90 
   8   1  -1  211.38   40.90 
  -8   1   1  160.28   46.70 
   8   1  -1  312.17   54.69 
  -8   1   1  223.38   53.59 
   8   1  -1  191.58   45.90 
   8   1  -1  231.18   49.70 
   8   1  -1  225.98   46.30 
  -8   1   1  230.68   40.30 
   7  -1  -1    2.40   14.30 
   7  -1  -1    0.90   13.40 
  -7  -1   1   -4.60   11.80 
   7  -1  -1   14.20   15.60 
  -7  -1   1   -0.50   11.40 
  -7  -1   1   36.40   21.10 
  -7  -1   1   -4.10   11.50 
   7  -1  -1   16.20   16.40 
  -7  -1   1   -0.30   14.80 
   7  -1  -1    5.20   11.50 
  -7  -1   1   15.80   12.40 
  -7  -1   1   14.50   13.80 
  -7  -1   1    2.90    8.00 
   7  -1  -1   13.40   13.00 
  -7  -1   1   -7.00    9.40 
   7  -1  -1   12.70   12.70 
  -7  -1   1   13.90   14.70 
   7  -1  -1   -7.30   15.20 
   7  -1  -1   -3.30   11.20 
   7  -1  -1   23.30   20.80 
  -7  -1   1    6.20    7.90 
  -7  -1   1   20.20   22.20 
  -7  -1   1   -5.40   14.00 
  -7  -1   1   -9.70   12.00 
   7  -1  -1    9.40   18.00 
   7  -1  -1    4.10    9.40 
   7   1  -1    3.70   11.50 
  -7   1   1    9.60   14.00 
  -7   1   1  -11.60   11.00 
  -7   1   1   -1.10   13.00 
   7   1  -1   -4.80   14.60 
  -7   1   1    6.20   10.90 
   7   1  -1    7.70   14.60 
  -7   1   1   19.20   13.20 
   7   1  -1   -2.90   10.80 
   7   1  -1  -13.20    9.20 
  -7   1   1    7.70   11.20 
  -7   1   1    1.60   17.00 
   7   1  -1    9.80   16.10 
   7   1  -1   28.50   16.80 
  -7   1   1   10.20   10.90 
  -7   1   1    6.90   10.80 
  -7   1   1   20.40   19.60 
   7   1  -1    9.20   10.80 
   7   1  -1   13.40   18.80 
   7   1  -1   13.10    8.80 
  -7   1   1   13.10   14.70 
   7   1  -1   18.80   18.50 
  -7   1   1   12.60   16.90 
   7   1  -1   22.20   16.70 
  -7   1   1   -3.80   11.00 
   7   1  -1   17.80   17.00 
  -6  -1   1 1478.35   86.29 
   6  -1  -1 1355.46   87.09 
   6  -1  -1 1418.56   83.89 
  -6  -1   1 1394.86   78.49 
  -6  -1   1 1489.45   65.29 
  -6  -1   1 1407.16   63.59 
   6  -1  -1 1331.37   71.19 
  -6  -1   1 1270.67   92.39 
   6  -1  -1 1482.85   75.59 
  -6  -1   1 1353.06   88.69 
   6  -1  -1 1461.75   91.59 
   6  -1  -1 1512.15   75.79 
  -6  -1   1 1333.47   93.19 
   6  -1  -1 1591.24   91.49 
   6  -1  -1 1444.36   86.49 
  -6  -1   1 1313.07   79.29 
   6  -1  -1 1427.66   87.19 
   6  -1  -1 1375.76   79.69 
  -6  -1   1 1377.86   76.89 
  -6  -1   1 1246.18   90.99 
  -6  -1   1 1494.55   76.09 
   6  -1  -1 1310.07   88.19 
  -6  -1   1 1496.95   81.89 
  -6  -1   1 1544.55   85.59 
   6  -1  -1 1479.55   74.29 
   6  -1  -1 1340.77   88.19 
   6  -1  -1 1461.05   66.69 
  -6   1   1 1308.17   91.59 
  -6   1   1 1377.06   80.29 
   6   1  -1 1403.66   91.89 
  -6   1   1 1484.95   88.79 
   6   1  -1 1468.65   70.99 
  -6   1   1 1427.66   72.39 
  -6   1   1 1644.34   83.19 
   6   1  -1 1530.85   81.89 
  -6   1   1 1425.66   58.79 
   6   1  -1 1325.27   85.49 
   6   1  -1 1570.24   89.19 
  -6   1   1 1518.85   75.09 
  -6   1   1 1399.16   70.29 
  -6   1   1 1375.66   92.39 
  -6   1   1 1479.15   69.99 
   6   1  -1 1443.46   89.69 
   6   1  -1 1414.06   90.79 
   6   1  -1 1397.46   89.69 
   6   1  -1 1415.86   82.89 
   6   1  -1 1405.86   87.59 
   6   1  -1 1503.85   83.49 
  -6   1   1 1509.75   83.79 
   6   1  -1 1364.46   70.79 
   6   1  -1 1279.97   83.49 
  -6   1   1 1525.55   78.09 
  -6   1   1 1518.25   94.09 
  -6   1   1 1384.36   82.69 
  -6   1   1 1468.15   59.49 
   5  -1  -1  624.54   41.90 
   5  -1  -1  680.03   38.20 
  -5  -1   1  657.23   45.40 
  -5  -1   1  600.14   46.30 
  -5  -1   1  629.14   48.00 
   5  -1  -1  767.42   56.19 
   5  -1  -1  570.14   58.09 
  -5  -1   1  667.13   35.90 
   5  -1  -1  624.94   27.60 
  -5  -1   1  659.63   43.30 
   5  -1  -1  578.04   47.50 
  -5  -1   1  646.34   46.70 
  -5  -1   1  660.83   57.99 
  -5  -1   1  558.04   47.60 
   5  -1  -1  703.03   49.40 
   5  -1  -1  677.23   53.49 
  -5  -1   1  571.44   58.99 
  -5  -1   1  622.44   35.40 
   5  -1  -1  633.74   40.40 
   5  -1  -1  648.24   42.80 
   5  -1  -1  600.74   50.09 
   5  -1  -1  620.04   44.90 
  -5  -1   1  534.25   61.09 
   5  -1  -1  640.84   51.19 
  -5  -1   1  597.14   54.49 
   5  -1  -1  639.14   42.40 
   5  -1  -1  603.44   52.29 
  -5  -1   1  589.74   45.20 
   5  -1  -1  612.54   50.19 
  -5   1   1  610.74   54.79 
  -5   1   1  623.34   45.80 
   5   1  -1  636.14   50.49 
  -5   1   1  642.04   39.20 
  -5   1   1  646.34   47.20 
   5   1  -1  687.63   51.49 
   5   1  -1  514.65   56.19 
   5   1  -1  616.24   61.69 
   5   1  -1  635.94   29.60 
   5   1  -1  714.13   55.79 
   5   1  -1  446.46   49.30 
   5   1  -1  585.44   41.10 
  -5   1   1  657.53   39.70 
  -5   1   1  605.64   41.00 
   5   1  -1  613.14   47.10 
  -5   1   1  636.64   41.10 
   5   1  -1  614.64   39.80 
   5   1  -1  592.54   47.40 
  -5   1   1  588.64   27.10 
  -5   1   1  635.64   36.70 
   5   1  -1  626.34   30.20 
  -5   1   1  642.14   29.70 
  -5   1   1  633.64   53.89 
  -5   1   1  588.54   43.10 
  -5   1   1  645.24   29.70 
  -5   1   1  582.54   53.09 
   5   1  -1  689.83   52.19 
   5   1  -1  633.84   45.60 
   5   1  -1  647.14   54.19 
  -5   1   1  605.14   49.40 
  -5   1   1  644.04   39.60 
   4  -1  -1 5785.92  198.18 
  -4  -1   1 5639.34  207.58 
  -4  -1   1 5572.24  167.18 
   4  -1  -1 5667.23  171.68 
   4  -1  -1 5689.03  199.58 
  -4  -1   1 5809.62  188.58 
   4  -1  -1 5702.93  182.18 
  -4  -1   1 5675.43  190.18 
  -4  -1   1 5581.44  197.68 
  -4  -1   1 5579.74  202.48 
   4  -1  -1 5608.24  184.28 
   4  -1  -1 5701.83  201.98 
   4  -1  -1 5492.65  197.18 
  -4  -1   1 5839.12  209.98 
   4  -1  -1 5581.64  188.68 
   4  -1  -1 5844.72  194.58 
   4  -1  -1 5530.15  178.88 
   4  -1  -1 5430.86  197.78 
   4  -1  -1 5539.45  189.48 
  -4  -1   1 5601.34  175.68 
  -4  -1   1 5745.62  176.78 
   4  -1  -1 5685.33  200.18 
   4  -1  -1 5645.14  201.78 
  -4  -1   1 5630.44  193.98 
  -4  -1   1 5258.87  191.78 
   4  -1  -1 5505.35  198.58 
   4  -1  -1 5410.86  185.08 
   4  -1  -1 5673.03  188.98 
  -4  -1   1 5248.38  192.98 
  -4  -1   1 5929.91  192.18 
   4  -1  -1 5611.54  204.98 
   4  -1  -1 5622.44  196.48 
  -4  -1   1 5412.96  192.78 
  -4   1   1 5640.14  192.28 
   4   1  -1 5713.53  198.78 
   4   1  -1 5648.13  167.48 
   4   1  -1 5428.56  197.78 
   4   1  -1 5369.56  196.88 
   4   1  -1 5656.13  196.08 
   4   1  -1 5539.65  188.48 
   4   1  -1 5453.95  201.48 
  -4   1   1 5584.84  184.28 
   4   1  -1 5542.85  200.28 
  -4   1   1 5662.43  183.28 
   4   1  -1 5687.53  203.48 
  -4   1   1 5434.36  196.18 
  -4   1   1 5439.16  173.38 
   4   1  -1 5688.53  202.38 
  -4   1   1 5741.13  183.88 
  -4   1   1 5623.64  167.78 
  -4   1   1 5579.54  170.88 
  -4   1   1 5612.74  190.88 
  -4   1   1 5622.94  181.78 
  -4   1   1 5656.33  182.68 
  -4   1   1 5528.95  202.78 
  -4   1   1 5487.25  166.68 
   4   1  -1 5616.24  166.48 
  -4   1   1 5525.05  191.18 
   4   1  -1 5566.74  177.48 
   4   1  -1 5672.03  168.28 
   4   1  -1 5313.47  177.68 
   4   1  -1 5565.84  191.48 
   4   1  -1 5609.34  195.08 
  -4   1   1 5583.54  185.08 
   4   1  -1 5597.84  167.88 
   4   1  -1 5487.65  196.78 
   4   1  -1 5560.04  183.58 
  -4   1   1 5610.54  190.38 
  -4   1   1 5457.35  176.58 
   4   1  -1 5832.82  206.68 
  -4   1   1 5620.34  180.08 
   3  -1  -1  549.54   36.30 
   3  -1  -1  596.34   35.10 
  -3  -1   1  600.24   42.90 
  -3  -1   1  513.95   26.40 
  -3  -1   1  464.85   31.40 
   3  -1  -1  516.05   31.50 
   3  -1  -1  557.34   37.00 
  -3  -1   1  562.24   37.10 
   3  -1  -1  469.65   34.30 
   3  -1  -1  509.95   28.80 
  -3  -1   1  518.85   39.00 
   3  -1  -1  562.74   28.20 
  -3  -1   1  593.24   43.30 
  -3  -1   1  552.44   37.30 
   3  -1  -1  508.55   37.80 
  -3  -1   1  561.64   35.80 
  -3  -1   1  573.54   33.70 
   3  -1  -1  552.14   36.10 
   3  -1  -1  576.44   31.90 
  -3  -1   1  539.05   26.10 
   3  -1  -1  455.15   31.90 
  -3  -1   1  547.95   38.10 
  -3  -1   1  503.85   24.30 
   3  -1  -1  568.44   38.10 
   3  -1  -1  544.45   37.20 
  -3  -1   1  553.64   34.20 
  -3  -1   1  507.25   35.00 
  -3  -1   1  581.04   37.10 
  -3  -1   1  531.45   35.40 
   3  -1  -1  550.54   36.60 
   3  -1  -1  516.55   26.00 
   3  -1  -1  510.85   35.80 
  -3  -1   1  542.55   35.40 
  -3  -1   1  538.95   41.30 
  -3  -1   1  564.24   36.60 
   3  -1  -1  513.65   32.60 
  -3  -1   1  597.74   43.70 
   3  -1  -1  513.05   37.40 
  -3  -1   1  542.85   37.60 
  -3  -1   1  496.65   33.30 
   3  -1  -1  536.05   28.10 
  -3   1   1  561.54   34.70 
  -3   1   1  497.95   34.00 
   3   1  -1  523.55   35.70 
   3   1  -1  535.35   37.20 
  -3   1   1  573.24   27.90 
   3   1  -1  525.35   30.40 
  -3   1   1  492.35   32.60 
  -3   1   1  486.95   34.10 
   3   1  -1  527.15   36.80 
   3   1  -1  519.45   35.60 
   3   1  -1  492.05   36.20 
  -3   1   1  454.95   25.80 
  -3   1   1  560.04   25.90 
   3   1  -1  612.34   42.60 
  -3   1   1  513.95   31.90 
   3   1  -1  525.35   35.30 
  -3   1   1  511.15   34.60 
   3   1  -1  471.95   36.60 
   3   1  -1  534.65   34.00 
  -3   1   1  532.15   28.90 
  -3   1   1  516.05   24.10 
  -3   1   1  522.15   24.30 
   3   1  -1  508.35   24.00 
  -3   1   1  518.25   34.10 
  -3   1   1  524.15   30.40 
   3   1  -1  501.75   36.40 
   3   1  -1  477.25   35.40 
  -3   1   1  516.05   29.50 
  -3   1   1  501.15   31.70 
  -3   1   1  511.95   28.10 
  -3   1   1  520.75   33.50 
   3   1  -1  543.85   21.10 
   3   1  -1  533.25   33.40 
   3   1  -1  469.15   36.70 
  -3   1   1  571.64   34.80 
  -3   1   1  565.44   31.00 
   3   1  -1  567.54   25.50 
  -3   1   1  497.05   29.00 
   3   1  -1  555.04   30.70 
  -3   1   1  543.55   37.00 
   3   1  -1  498.95   29.30 
   3   1  -1  544.35   34.60 
  -3   1   1  514.65   34.80 
   3   1  -1  565.34   36.80 
   3   1  -1  549.54   35.40 
   2  -1  -1 3176.58  103.19 
  -2  -1   1 3325.47  115.29 
   2  -1  -1 3152.58  110.09 
   2  -1  -1 3125.59  111.09 
  -2  -1   1 3364.16  115.19 
  -2  -1   1 3285.17  112.59 
  -2  -1   1 3424.46  117.29 
  -2  -1   1 3203.78  111.79 
  -2  -1   1 3303.27  104.19 
   2  -1  -1 3294.77  111.69 
   2  -1  -1 3318.97  103.89 
  -2  -1   1 3463.55  114.49 
  -2  -1   1 3308.77  115.59 
   2  -1  -1 3164.98  112.89 
  -2  -1   1 3472.65  119.99 
   2  -1  -1 3248.38  106.99 
  -2  -1   1 3330.37  102.89 
  -2  -1   1 3322.97  113.79 
   2  -1  -1 3364.66  113.49 
   2  -1  -1 3283.27  110.09 
  -2  -1   1 3220.28  110.89 
   2  -1  -1 3315.07  111.59 
   2  -1  -1 3304.57  108.19 
   2  -1  -1 3276.67  112.29 
   2  -1  -1 3240.98  105.09 
  -2  -1   1 3377.96  114.29 
   2  -1  -1 3199.08  113.49 
  -2  -1   1 3254.57  111.19 
  -2  -1   1 3253.37  114.29 
   2  -1  -1 3292.37  111.49 
  -2  -1   1 3209.58  110.09 
  -2  -1   1 3368.76  113.29 
  -2  -1   1 3327.37  113.19 
   2  -1  -1 3297.67   99.99 
   2  -1  -1 3082.99  111.99 
  -2  -1   1 3272.47  110.79 
  -2  -1   1 3395.06  116.59 
  -2  -1   1 3330.67  118.19 
  -2  -1   1 3415.76  115.79 
  -2  -1   1 3312.57  113.89 
  -2  -1   1 3268.27  102.39 
  -2  -1   1 3186.58  110.79 
  -2  -1   1 3378.86  114.89 
   2  -1  -1 3239.98  109.19 
   2  -1  -1 3199.78  113.39 
   2   1  -1 3303.87  112.79 
   2   1  -1 3413.06  112.09 
  -2   1   1 3210.58  105.29 
   2   1  -1 3214.38  117.09 
  -2   1   1 3165.88  102.19 
  -2   1   1 3172.18  110.09 
   2   1  -1 3271.97  110.39 
  -2   1   1 3288.27  114.29 
  -2   1   1 3220.78  111.79 
  -2   1   1 3318.77  112.99 
   2   1  -1 3203.58  113.19 
  -2   1   1 3412.06  108.49 
  -2   1   1 3144.39  103.79 
   2   1  -1 3199.18  113.39 
   2   1  -1 3224.08  111.29 
  -2   1   1 3017.50   98.39 
  -2   1   1 3281.87  100.79 
  -2   1   1 3212.18  111.79 
   2   1  -1 3161.58  112.79 
  -2   1   1 3220.98  113.59 
  -2   1   1 3249.18  110.59 
  -2   1   1 3013.40  109.69 
  -2   1   1 3077.39  111.59 
   2   1  -1 3325.47  100.89 
   2   1  -1 3428.26  114.29 
   2   1  -1 3273.87  101.89 
  -2   1   1 3284.57  103.69 
  -2   1   1 3347.06  102.79 
  -2   1   1 3211.48  113.19 
  -2   1   1 3338.67  111.19 
  -2   1   1 3263.97  110.49 
   2   1  -1 3081.99  113.09 
  -2   1   1 3145.69  110.09 
  -2   1   1 3322.27  113.39 
  -2   1   1 3264.07  107.09 
  -2   1   1 3242.68  106.49 
   2   1  -1 3148.39  100.59 
   2   1  -1 3079.29  112.99 
   2   1  -1 3267.47  109.29 
   2   1  -1 3378.96  116.59 
  -2   1   1 3098.29  105.69 
  -2   1   1 3353.96  111.29 
   2   1  -1 3289.97  110.79 
   2   1  -1 3348.86  115.09 
  -2   1   1 3364.16  110.69 
   2   1  -1 3258.97  104.19 
   2   1  -1 3157.48  110.79 
   2   1  -1 3226.38  113.99 
  -2   1   1 3179.38  103.89 
  -2   1   1 3347.47  110.49 
   2   1  -1 3310.07  114.59 
  -2   1   1 3307.57  108.79 
   2   1  -1 3155.28  112.59 
   2   1  -1 3197.08  115.99 
  -1  -1   1  560.94   26.40 
  -1  -1   1  570.84   29.00 
  -1  -1   1  608.74   29.80 
   1  -1  -1  560.54   25.10 
  -1  -1   1  620.84   29.70 
  -1  -1   1  607.94   28.50 
   1  -1  -1  597.64   27.30 
  -1  -1   1  610.04   24.70 
  -1  -1   1  608.94   28.80 
  -1  -1   1  565.74   29.60 
  -1  -1   1  667.53   29.20 
  -1  -1   1  649.93   30.40 
  -1  -1   1  620.24   29.60 
  -1  -1   1  605.54   27.30 
   1  -1  -1  611.04   26.60 
  -1  -1   1  612.74   28.90 
   1  -1  -1  590.94   25.80 
   1  -1  -1  521.85   24.50 
  -1  -1   1  583.04   30.00 
  -1  -1   1  553.34   25.40 
  -1  -1   1  627.24   26.80 
  -1  -1   1  635.74   25.30 
  -1  -1   1  562.44   28.80 
  -1  -1   1  601.84   30.00 
  -1  -1   1  625.04   29.30 
   1  -1  -1  456.95   27.00 
   1  -1  -1  602.44   29.70 
   1  -1  -1  580.64   24.10 
  -1  -1   1  538.25   28.80 
  -1  -1   1  579.54   25.10 
  -1  -1   1  584.74   29.60 
  -1   1   1  623.24   29.50 
   1   1  -1  597.14   28.30 
   1   1  -1  662.63   31.00 
  -1   1   1  599.44   24.70 
   1   1  -1  606.24   25.60 
  -1   1   1  629.64   30.20 
  -1   1   1  605.74   27.60 
   1   1  -1  550.54   29.10 
  -1   1   1  554.74   26.00 
  -1   1   1  618.74   24.50 
   1   1  -1  578.14   28.30 
  -1   1   1  633.64   25.00 
  -1   1   1  633.34   26.30 
  -1   1   1  593.44   23.40 
  -1   1   1  612.34   26.00 
  -1   1   1  614.64   27.50 
   1   1  -1  589.74   25.90 
   1   1  -1  589.54   29.10 
   1   1  -1  568.44   25.20 
  -1   1   1  614.34   28.40 
  -1   1   1  570.44   24.00 
   1   1  -1  563.94   28.20 
   1   1  -1  614.84   29.60 
  -1   1   1  636.54   26.20 
   1   1  -1  597.44   26.60 
  -1   1   1  574.14   28.70 
   1   1  -1  607.24   28.80 
   1   1  -1  595.44   25.00 
   1   1  -1  582.04   29.60 
   1   1  -1  586.64   28.70 
   1   1  -1  631.44   29.70 
   1   1  -1  596.24   29.30 
  -1   1   1  600.84   20.60 
   1   1  -1  625.74   27.50 
   1   1  -1  587.24   29.10 
   1   1  -1  602.94   26.40 
  -1   1   1  573.04   27.00 
  -1   1   1  609.24   23.70 
   1   1  -1  588.44   26.90 
  -1   1   1  578.34   29.50 
   1   1  -1  607.84   30.00 
   1   1  -1  575.34   29.60 
  -1   1   1  632.64   23.50 
  -1   1   1  638.94   31.20 
   1   1  -1  607.14   28.30 
  -1   1   1  570.24   25.40 
   1   1  -1  642.74   29.50 
  -1   1   1  588.54   29.50 
  -1   1   1  589.54   21.90 
  -1   1   1  586.54   23.90 
   0  -1  -1 8925.51  252.37 
   0  -1   1 7416.36  250.17 
   0  -1  -1 8539.35  251.87 
   0  -1  -1 9029.40  252.47 
   0   1   1 8657.33  244.08 
   0   1   1 8625.74  247.48 
   0   1   1 8598.44  253.07 
   0   1  -1 8803.12  242.68 
   0   1   1 7316.07  266.77 
   0   1  -1 8200.68  255.87 
   0   1  -1 8572.64  251.17 
   0   1   1 7908.91  259.67 
   0   1  -1 8537.65  252.57 
   0   1   1 8553.94  245.88 
   0   1   1 8752.52  243.78 
   0   1   1 8578.84  249.58 
   0   1   1 8928.21  247.98 
   0   1  -1 8670.03  249.68 
   0   1   1 7741.63  263.97 
   0   1  -1 8521.75  248.28 
   0   1   1 8347.86  253.47 
   0   1   1 7955.40  268.57 
   0   1   1 8609.34  248.38 
   0   1   1 8600.34  249.78 
   0   1  -1 8864.31  244.58 
   0   1   1 8941.30  249.18 
   0   1  -1 8548.54  247.98 
   0   1  -1 8554.64  251.37 
   0   1  -1 8509.15  250.57 
   0   1  -1 8439.46  250.77 
   0   1  -1 8645.63  246.78 
   0   1   1 8874.21  248.98 
   0   1   1 8495.45  252.77 
   0   1  -1 8719.33  256.77 
  -1  -1  -1  809.72   34.00 
  -1  -1  -1  828.32   39.30 
  -1  -1  -1  868.61   40.70 
   1  -1   1  806.52   33.50 
   1  -1   1  674.83   32.80 
  -1  -1  -1  848.02   41.10 
   1  -1   1  846.72   37.20 
  -1  -1  -1  928.51   37.80 
  -1  -1  -1  768.42   36.60 
  -1  -1  -1  772.22   33.40 
  -1  -1  -1  799.72   36.40 
  -1  -1  -1  851.11   35.00 
  -1  -1  -1  858.81   38.00 
   1  -1   1  786.02   36.50 
   1  -1   1  833.72   40.40 
  -1  -1  -1  859.51   36.10 
   1  -1   1  830.62   40.70 
  -1  -1  -1  815.22   37.10 
  -1  -1  -1  807.12   36.80 
   1  -1   1  822.22   34.20 
  -1  -1  -1  872.61   37.70 
  -1  -1  -1  815.02   36.90 
  -1  -1  -1  857.71   37.60 
   1  -1   1  830.82   39.00 
   1  -1   1  881.81   36.10 
  -1  -1  -1  865.01   38.30 
  -1  -1  -1  819.92   33.50 
  -1  -1  -1  797.12   35.90 
  -1  -1  -1  853.81   33.20 
  -1  -1  -1  828.52   35.60 
  -1  -1  -1  864.91   35.00 
   1  -1   1  814.32   39.70 
   1  -1   1  816.82   30.70 
   1  -1   1  834.32   30.80 
  -1  -1  -1  848.02   37.30 
  -1  -1  -1  816.42   36.60 
   1  -1   1  806.32   30.90 
   1  -1   1  822.62   36.50 
  -1  -1  -1  820.42   37.50 
  -1  -1  -1  795.82   40.50 
  -1  -1  -1  873.71   39.50 
   1  -1   1  732.03   33.40 
   1  -1   1  824.92   38.90 
  -1   1  -1  799.22   34.00 
  -1   1  -1  817.52   37.10 
   1   1   1  823.22   37.50 
   1   1   1  797.22   36.50 
  -1   1  -1  815.22   33.60 
   1   1   1  864.91   37.30 
  -1   1  -1  789.02   37.20 
   1   1   1  839.52   35.80 
  -1   1  -1  826.22   31.40 
   1   1   1  831.62   38.90 
   1   1   1  925.91   38.70 
   1   1   1  857.71   40.60 
   1   1   1  849.52   34.90 
   1   1   1  865.21   37.80 
   1   1   1  851.31   33.10 
   1   1   1  852.51   39.50 
   1   1   1  873.51   35.80 
  -1   1  -1  832.82   28.80 
  -1   1  -1  789.92   36.70 
  -1   1  -1  855.41   27.70 
  -1   1  -1  855.01   37.30 
  -1   1  -1  815.02   28.40 
   1   1   1  835.72   36.10 
   1   1   1  840.32   37.40 
  -1   1  -1  817.92   40.20 
   1   1   1  862.41   36.90 
  -1   1  -1  883.31   34.80 
  -1   1  -1  823.12   35.50 
   1   1   1  789.72   36.90 
  -1   1  -1  858.01   39.90 
  -1   1  -1  808.72   27.90 
   1   1   1  873.01   37.90 
  -1   1  -1  848.12   33.90 
   1   1   1  828.02   36.60 
  -1   1  -1  816.82   33.30 
   1   1   1  769.12   36.30 
  -1   1  -1  848.12   29.80 
  -1   1  -1  841.32   28.50 
  -1   1  -1  863.11   31.60 
  -1   1  -1  848.32   38.90 
  -1   1  -1  857.41   31.10 
   1   1   1  790.22   34.00 
  -1   1  -1  841.32   34.70 
   1   1   1  835.32   33.60 
   1   1   1  831.02   37.50 
   1   1   1  897.81   35.00 
   1   1   1  828.42   36.70 
  -1   1  -1  878.41   41.10 
  -1   1  -1  868.01   39.60 
   1   1   1  793.72   39.90 
   1   1   1  847.52   37.20 
   1   1   1  813.02   36.50 
  -1   1  -1  772.12   35.10 
  -1   1  -1  837.82   39.50 
  -1   1  -1  862.81   40.40 
   2  -1   1 9063.89  285.07 
   2  -1   1 8778.02  278.07 
   2  -1   1 9171.78  280.87 
  -2  -1  -1 9196.28  281.47 
   2  -1   1 8735.33  280.27 
   2  -1   1 8949.70  276.17 
   2  -1   1 8854.61  276.57 
   2  -1   1 9188.78  278.07 
  -2  -1  -1 9204.58  280.17 
  -2  -1  -1 9284.17  279.97 
  -2  -1  -1 9407.56  279.37 
   2  -1   1 8773.92  265.27 
   2  -1   1 9044.70  280.37 
  -2  -1  -1 9148.38  281.17 
   2  -1   1 9166.98  268.37 
   2  -1   1 8833.72  261.97 
  -2  -1  -1 8929.91  281.77 
   2  -1   1 9088.19  283.87 
  -2  -1  -1 8921.91  277.17 
   2  -1   1 8662.43  281.37 
  -2  -1  -1 9462.35  287.07 
  -2  -1  -1 9049.89  279.87 
  -2  -1  -1 9139.39  281.77 
   2  -1   1 8955.20  273.37 
  -2  -1  -1 8875.51  264.87 
  -2  -1  -1 9262.77  276.47 
   2  -1   1 8841.52  267.97 
   2  -1   1 9151.88  275.27 
   2  -1   1 9021.30  281.07 
  -2  -1  -1 9359.86  279.87 
  -2  -1  -1 9176.78  280.87 
  -2  -1  -1 9120.79  279.47 
  -2  -1  -1 8501.45  284.17 
  -2  -1  -1 9398.66  277.57 
  -2  -1  -1 9106.49  281.27 
  -2  -1  -1 9128.29  286.77 
   2  -1   1 8976.40  266.07 
  -2  -1  -1 9293.17  279.57 
   2  -1   1 8890.71  270.97 
  -2  -1  -1 9104.29  277.37 
   2  -1   1 8988.60  274.37 
  -2  -1  -1 9261.67  277.67 
  -2  -1  -1 9270.27  278.17 
  -2  -1  -1 9397.66  280.07 
   2  -1   1 8830.82  271.87 
  -2   1  -1 8773.62  266.67 
  -2   1  -1 8943.80  266.77 
  -2   1  -1 9131.49  282.27 
   2   1   1 9423.06  280.87 
  -2   1  -1 9484.65  282.27 
   2   1   1 9090.09  281.37 
  -2   1  -1 9027.80  279.67 
   2   1   1 9354.16  279.77 
   2   1   1 9296.97  279.17 
  -2   1  -1 9036.40  269.67 
  -2   1  -1 8870.01  280.87 
   2   1   1 9178.98  268.57 
   2   1   1 8924.81  281.97 
   2   1   1 9021.90  274.67 
  -2   1  -1 9102.69  273.07 
  -2   1  -1 9065.39  268.17 
   2   1   1 9332.67  267.77 
   2   1   1 9000.50  279.27 
  -2   1  -1 9212.08  269.17 
  -2   1  -1 9546.24  279.87 
   2   1   1 8977.30  278.37 
   2   1   1 8982.80  285.67 
   2   1   1 9292.17  286.07 
  -2   1  -1 8970.50  279.47 
  -2   1  -1 9075.29  276.47 
   2   1   1 9363.36  286.27 
   2   1   1 9335.07  277.87 
  -2   1  -1 8586.34  274.37 
   2   1   1 8784.92  281.67 
  -2   1  -1 9145.49  260.37 
  -2   1  -1 9022.50  276.97 
   2   1   1 9397.66  282.57 
  -2   1  -1 9079.69  285.77 
   2   1   1 9173.08  284.07 
  -2   1  -1 9295.37  283.57 
   2   1   1 9152.08  277.77 
   2   1   1 9015.20  279.77 
   2   1   1 8727.63  279.97 
   2   1   1 8914.31  279.37 
  -2   1  -1 8793.42  262.47 
   2   1   1 8798.82  276.87 
  -2   1  -1 8901.71  265.97 
   2   1   1 9176.48  265.47 
   2   1   1 9190.68  278.17 
  -2   1  -1 9186.98  278.07 
   2   1   1 9298.07  275.37 
  -2   1  -1 8830.32  274.37 
  -2   1  -1 9059.19  260.47 
  -2   1  -1 8591.84  277.87 
  -2   1  -1 8630.84  274.57 
  -2   1  -1 8542.95  280.77 
   2   1   1 8842.92  279.87 
  -2   1  -1 8949.41  271.77 
   2   1   1 9181.78  277.97 
  -2   1  -1 9203.18  271.47 
  -2   1  -1 8982.20  275.37 
  -3  -1  -1    3.40    7.00 
   3  -1   1   -0.60    7.20 
  -3  -1  -1   10.00    3.80 
  -3  -1  -1   14.40    8.60 
   3  -1   1    5.00    8.90 
  -3  -1  -1   24.00    9.20 
  -3  -1  -1    3.60    8.60 
   3  -1   1   10.40   10.50 
   3  -1   1    6.80    6.90 
   3  -1   1    8.80    4.80 
  -3  -1  -1    8.00    7.20 
  -3  -1  -1    3.30    7.80 
   3  -1   1    6.90    4.30 
   3  -1   1   17.90    8.90 
   3  -1   1   21.30   10.60 
  -3  -1  -1    5.10    7.40 
  -3  -1  -1   -7.60    4.10 
  -3  -1  -1   24.50   12.10 
   3  -1   1   11.20    6.70 
   3  -1   1   19.80   11.30 
   3  -1   1    2.60    7.00 
   3  -1   1   17.20    9.30 
   3  -1   1   13.30   10.20 
   3  -1   1   12.70    9.10 
  -3  -1  -1   16.70    8.50 
  -3  -1  -1   18.80   10.30 
   3  -1   1   12.00    6.90 
  -3  -1  -1    9.00    3.30 
  -3  -1  -1   10.70   11.80 
  -3  -1  -1    5.40    9.90 
  -3  -1  -1   23.20    9.50 
   3  -1   1    0.90    7.30 
  -3  -1  -1    2.40    7.10 
   3  -1   1   13.10    9.00 
  -3  -1  -1   21.40   11.70 
   3  -1   1   15.10   10.90 
   3  -1   1   17.00    7.90 
   3   1   1    8.00    9.30 
  -3   1  -1    9.20    7.70 
   3   1   1   12.90    9.70 
   3   1   1   12.60    6.80 
  -3   1  -1    9.70    9.30 
  -3   1  -1    6.70    4.80 
   3   1   1    1.40    5.90 
  -3   1  -1   14.30    8.30 
   3   1   1    9.50    9.00 
   3   1   1   12.20   10.10 
  -3   1  -1    7.40    5.70 
  -3   1  -1    5.70    6.50 
  -3   1  -1   22.60   11.70 
   3   1   1   13.20    9.60 
   3   1   1   23.60   13.40 
  -3   1  -1    4.80    5.70 
   3   1   1    1.10    3.80 
   3   1   1   14.90   11.00 
  -3   1  -1    3.50    4.00 
   3   1   1   10.60    9.30 
  -3   1  -1   15.10    8.80 
  -3   1  -1   14.50    6.50 
   3   1   1    3.90    8.20 
   3   1   1    5.80    3.50 
   3   1   1   13.60    8.60 
   3   1   1   12.10    4.80 
   3   1   1    8.00    7.70 
  -3   1  -1    9.50    7.60 
  -3   1  -1   10.10    8.00 
   3   1   1    4.50    6.70 
  -3   1  -1   16.80    7.80 
   3   1   1    7.70    9.20 
   3   1   1   17.40    5.30 
  -3   1  -1   13.80    7.60 
  -3   1  -1    2.00    7.20 
  -3   1  -1   20.60    9.50 
  -3   1  -1    7.70    3.80 
   3   1   1   16.30    8.60 
  -3   1  -1   20.00    8.80 
  -3   1  -1    2.70    9.10 
  -3   1  -1   12.30    4.80 
  -3   1  -1   12.20    8.20 
   3   1   1   -5.90    7.20 
   3   1   1    9.40    6.50 
   3   1   1    8.50    9.00 
   3   1   1   -5.40    6.20 
  -3   1  -1   14.40    7.80 
  -3   1  -1    8.20    4.80 
   3   1   1   13.50    6.30 
   4  -1   1 2299.97   94.99 
  -4  -1  -1 2054.19  106.49 
  -4  -1  -1 2384.66   75.49 
   4  -1   1 2460.15   90.79 
  -4  -1  -1 2269.47   92.69 
   4  -1   1 2182.38  101.69 
  -4  -1  -1 2279.77   98.49 
   4  -1   1 2255.27   84.89 
   4  -1   1 2268.57   95.79 
   4  -1   1 2229.58   81.89 
  -4  -1  -1 2337.87   98.29 
  -4  -1  -1 2314.97   75.09 
  -4  -1  -1 2228.48   91.89 
  -4  -1  -1 2315.37   94.39 
   4  -1   1 2297.67  103.49 
   4  -1   1 2275.67   97.09 
   4  -1   1 2200.08  101.89 
   4  -1   1 2187.38   90.39 
   4  -1   1 2284.37  108.69 
  -4  -1  -1 2392.76  105.29 
   4  -1   1 2134.49   72.49 
   4  -1   1 2220.38  103.99 
   4  -1   1 2266.27   97.49 
   4  -1   1 2178.08   99.99 
  -4  -1  -1 2269.47  104.39 
   4  -1   1 2215.28   99.69 
  -4  -1  -1 2277.07   95.59 
  -4  -1  -1 2161.88   96.89 
  -4  -1  -1 2183.78  108.19 
   4  -1   1 2236.38  104.89 
   4  -1   1 2299.57  101.19 
  -4  -1  -1 2314.67  108.39 
  -4   1  -1 2277.57   71.99 
   4   1   1 2189.88   72.59 
  -4   1  -1 2257.87  104.89 
   4   1   1 2248.28   98.69 
   4   1   1 2256.17   82.39 
  -4   1  -1 2185.08   72.19 
   4   1   1 2215.78  101.09 
  -4   1  -1 2223.18   78.79 
   4   1   1 2195.88  107.99 
  -4   1  -1 2344.77   93.49 
   4   1   1 2281.87  103.99 
   4   1   1 2179.48  103.29 
  -4   1  -1 2255.17   79.89 
   4   1   1 2173.28   81.39 
   4   1   1 2277.67   73.49 
  -4   1  -1 2213.98   92.09 
  -4   1  -1 2312.07  100.69 
  -4   1  -1 2204.48   96.09 
  -4   1  -1 2325.17   87.79 
   4   1   1 2166.68  104.09 
   4   1   1 2321.67   99.19 
   4   1   1 2362.06   84.09 
  -4   1  -1 2340.87   92.99 
  -4   1  -1 2232.68   82.89 
   4   1   1 2217.38  101.79 
   4   1   1 2291.17  101.59 
   4   1   1 2456.45  102.39 
  -4   1  -1 2268.87   89.99 
  -4   1  -1 2236.58   87.49 
  -4   1  -1 2200.68  101.09 
   4   1   1 2282.87   93.89 
  -4   1  -1 2251.47  105.59 
  -4   1  -1 2235.68   78.39 
  -4   1  -1 2289.27   71.49 
   4   1   1 2300.57   95.49 
   4   1   1 2188.78  102.19 
   4   1   1 2198.08  102.09 
  -4   1  -1 2358.26   90.29 
   4   1   1 2147.89   93.59 
  -4   1  -1 2201.88   73.39 
   5  -1   1   50.09   21.00 
  -5  -1  -1   52.99   10.00 
   5  -1   1   30.40   15.40 
  -5  -1  -1   17.40   11.10 
   5  -1   1   27.50   15.80 
  -5  -1  -1   96.29   27.50 
  -5  -1  -1   46.60   16.90 
  -5  -1  -1   28.80    7.80 
  -5  -1  -1   29.50   15.60 
  -5  -1  -1   49.50   18.90 
   5  -1   1   78.19   23.30 
   5  -1   1   51.59   12.90 
  -5  -1  -1   34.70   15.00 
  -5  -1  -1   36.70   20.40 
  -5  -1  -1   42.50   16.40 
   5  -1   1   32.00   15.50 
   5  -1   1   50.09   15.00 
  -5  -1  -1   28.60   16.50 
   5  -1   1   59.79   24.40 
   5  -1   1   25.90   13.90 
   5  -1   1   23.90   14.90 
   5  -1   1   15.30   10.60 
   5  -1   1   45.10   12.10 
   5  -1   1   34.60   17.90 
   5  -1   1   29.90   14.20 
  -5  -1  -1   38.70   19.20 
   5  -1   1   49.40   16.50 
  -5  -1  -1   51.19   14.90 
   5  -1   1   46.30   16.20 
   5   1   1   64.19   22.40 
  -5   1  -1   27.70   12.10 
  -5   1  -1   42.10   10.30 
  -5   1  -1   37.70   15.60 
   5   1   1   50.79   19.50 
   5   1   1   45.40   16.90 
  -5   1  -1   61.29   16.40 
  -5   1  -1   13.10   14.80 
  -5   1  -1   32.40   16.90 
   5   1   1   32.90   16.80 
   5   1   1   30.90   14.50 
   5   1   1   31.50   14.60 
  -5   1  -1   44.20    9.20 
  -5   1  -1   35.50    8.40 
   5   1   1   27.30   15.70 
   5   1   1   58.29   19.40 
  -5   1  -1   44.40   19.90 
  -5   1  -1   35.10   15.00 
  -5   1  -1   36.90   13.70 
  -5   1  -1   42.40   11.70 
   5   1   1   48.90   12.10 
   5   1   1   32.30   15.80 
  -5   1  -1   37.40   13.40 
   5   1   1   44.10    8.30 
  -5   1  -1   40.80   11.70 
  -5   1  -1   50.29   10.20 
   5   1   1   28.30   15.10 
   5   1   1   26.70   14.50 
   5   1   1   33.30   16.70 
   5   1   1   26.30   10.80 
   5   1   1   22.20   11.60 
  -6  -1  -1   12.20    6.70 
  -6  -1  -1   10.20   10.40 
   6  -1   1   -3.20    8.10 
   6  -1   1    9.80   10.30 
   6  -1   1   10.90   10.90 
   6  -1   1   10.70    8.40 
  -6  -1  -1   14.60   11.30 
   6  -1   1   22.10   15.30 
   6  -1   1    6.60   12.50 
  -6  -1  -1    5.80   11.80 
   6  -1   1   -4.60    9.50 
  -6  -1  -1  -10.30   12.60 
  -6  -1  -1   -3.90   11.20 
  -6  -1  -1   14.60   13.90 
  -6  -1  -1    4.50   15.90 
   6  -1   1  -11.60    8.60 
  -6  -1  -1    5.20   11.30 
   6  -1   1  -10.10   11.10 
   6  -1   1    1.10   10.40 
  -6  -1  -1   -1.40   11.40 
   6  -1   1    4.60   10.70 
  -6  -1  -1   -1.10   10.40 
  -6  -1  -1   27.70   19.30 
   6  -1   1   22.70   18.70 
  -6  -1  -1    4.90    6.50 
  -6  -1  -1   19.00    9.60 
   6  -1   1    4.70    9.70 
   6  -1   1   43.60   23.10 
   6  -1   1    4.40   14.20 
   6  -1   1    9.70   14.90 
   6   1   1   18.80   15.30 
  -6   1  -1   -1.50   13.10 
   6   1   1   -6.40   10.40 
   6   1   1    9.70   16.10 
  -6   1  -1    3.80   11.20 
  -6   1  -1    8.40   11.00 
   6   1   1   19.10    8.60 
   6   1   1   -4.80   10.40 
   6   1   1    2.30   10.70 
  -6   1  -1   -2.80   10.00 
  -6   1  -1   -1.10   14.40 
  -6   1  -1   24.20   12.40 
   6   1   1   -5.00   12.50 
  -6   1  -1   13.20    8.10 
   6   1   1   -1.50   10.60 
   6   1   1   41.30   21.40 
   6   1   1   19.50   13.40 
   6   1   1    4.90   12.00 
  -6   1  -1    8.40   14.90 
  -6   1  -1   14.00    8.00 
  -6   1  -1   10.00   11.60 
   6   1   1    2.00   12.00 
  -6   1  -1   10.90    8.60 
   6   1   1    4.80   10.50 
  -6   1  -1    3.60   10.00 
   6   1   1    6.20   11.20 
  -6   1  -1   29.30   13.70 
   7  -1   1  105.99   32.90 
   7  -1   1   98.29   31.20 
   7  -1   1  136.09   35.40 
   7  -1   1  116.59   28.20 
  -7  -1  -1  133.29   34.50 
  -7  -1  -1   72.99   34.60 
   7  -1   1   87.59   21.70 
  -7  -1  -1   73.79   26.10 
  -7  -1  -1  117.19   28.40 
  -7  -1  -1  118.19   37.50 
   7  -1   1  188.08   44.20 
  -7  -1  -1  157.38   39.50 
   7  -1   1   95.49   27.30 
   7  -1   1  170.08   43.80 
   7  -1   1  108.29   30.70 
   7  -1   1  133.29   23.60 
  -7  -1  -1   80.59   25.90 
   7  -1   1  154.38   28.20 
   7  -1   1  124.99   33.50 
   7  -1   1  100.89   31.20 
  -7  -1  -1  102.99   25.60 
   7  -1   1  181.68   32.20 
  -7  -1  -1  133.99   28.70 
  -7  -1  -1  105.59   38.60 
  -7  -1  -1  109.19   29.10 
   7  -1   1  161.18   39.20 
   7   1   1  137.79   37.70 
   7   1   1  161.78   30.70 
  -7   1  -1  105.99   30.20 
   7   1   1  144.39   35.90 
  -7   1  -1  124.79   20.20 
  -7   1  -1   84.79   26.50 
   7   1   1  114.19   34.30 
  -7   1  -1  124.59   26.60 
  -7   1  -1   96.19   33.70 
   7   1   1  117.29   38.30 
   7   1   1  139.89   36.40 
   7   1   1  113.79   33.90 
   7   1   1  114.29   29.00 
   7   1   1  126.69   36.20 
   7   1   1  138.39   34.40 
  -7   1  -1   92.39   30.50 
   7   1   1  130.49   30.20 
  -7   1  -1  113.89   27.20 
  -7   1  -1  172.58   40.90 
  -7   1  -1   98.39   25.30 
  -7   1  -1  166.18   41.40 
  -7   1  -1  118.09   23.00 
   7   1   1  152.18   37.70 
  -7   1  -1   81.49   33.10 
   7   1   1  143.99   37.30 
  -7   1  -1  124.69   27.20 
  -8  -1  -1  146.19   31.10 
  -8  -1  -1  151.18   36.60 
   8  -1   1  128.99   40.00 
  -8  -1  -1  125.69   43.80 
  -8  -1  -1  129.49   35.00 
  -8  -1  -1  130.19   36.10 
   8  -1   1  136.19   31.60 
  -8  -1  -1  168.28   43.30 
  -8  -1  -1   99.79   32.70 
  -8  -1  -1  145.39   44.40 
   8  -1   1  130.49   27.70 
   8  -1   1  148.19   41.80 
  -8  -1  -1  123.59   42.90 
   8  -1   1  109.89   36.50 
   8  -1   1  151.58   41.70 
   8  -1   1  232.48   51.69 
   8  -1   1  160.28   39.70 
   8  -1   1  178.58   42.20 
  -8  -1  -1  172.28   35.20 
   8  -1   1  154.58   36.50 
   8  -1   1  173.08   43.20 
   8   1   1  212.38   49.10 
   8   1   1  109.49   30.70 
  -8   1  -1  167.88   46.10 
  -8   1  -1  154.68   39.90 
  -8   1  -1  176.78   44.20 
   8   1   1  135.89   38.80 
   8   1   1  201.08   44.00 
  -8   1  -1  115.49   28.80 
  -8   1  -1  181.08   34.20 
   8   1   1  203.38   35.50 
  -8   1  -1  153.48   32.90 
   8   1   1  162.38   42.60 
  -8   1  -1  171.18   50.69 
  -8   1  -1  116.09   36.30 
   8   1   1  143.69   39.90 
  -8   1  -1  163.98   35.00 
   8   1   1  186.88   47.00 
   8   1   1  172.78   44.20 
   8   1   1  202.78   43.90 
   8   1   1  172.08   43.30 
   8   1   1  127.49   41.50 
  -8   1  -1  133.19   37.20 
  -8   1  -1  102.09   37.50 
   9  -1   1   47.40   27.40 
  -9  -1  -1   32.80   24.00 
   9  -1   1   19.40   21.30 
  -9  -1  -1   18.90   28.80 
  -9  -1  -1   72.39   28.30 
  -9  -1  -1   55.39   30.30 
  -9  -1  -1   30.80   29.50 
  -9  -1  -1   38.60   29.30 
  -9  -1  -1   29.30   21.30 
   9  -1   1  -10.40   18.50 
   9  -1   1   17.80   24.10 
   9  -1   1   18.80   28.30 
   9  -1   1   86.19   35.20 
  -9  -1  -1   84.09   39.10 
   9  -1   1   29.00   26.80 
  -9  -1  -1   31.40   22.40 
   9  -1   1   19.50   25.70 
  -9  -1  -1   23.90   22.50 
  -9  -1  -1   22.80   25.00 
  -9   1  -1    9.60   23.70 
   9   1   1   89.89   37.20 
   9   1   1   14.80   21.90 
   9   1   1   38.70   25.10 
  -9   1  -1   53.59   28.10 
   9   1   1   49.10   28.70 
   9   1   1   33.90   25.10 
  -9   1  -1   33.80   29.90 
   9   1   1   27.80   26.60 
  -9   1  -1   -1.70   21.30 
   9   1   1   28.90   24.90 
  -9   1  -1   22.00   26.00 
  -9   1  -1   54.99   28.10 
  -9   1  -1    7.30   21.60 
  -9   1  -1   17.90   23.60 
   9   1   1   28.20   27.80 
   9   1   1   30.90   30.10 
 -10  -1  -1   48.30   33.90 
 -10  -1  -1  116.99   48.90 
 -10  -1  -1  117.49   39.00 
 -10  -1  -1  104.69   38.70 
 -10  -1  -1  102.19   54.09 
  10  -1   1   90.09   43.00 
  10  -1   1   75.69   34.90 
  10  -1   1  131.39   49.80 
  10  -1   1  131.39   47.00 
 -10  -1  -1  159.38   48.40 
  10  -1   1  135.09   49.30 
 -10  -1  -1  134.49   48.60 
 -10  -1  -1   95.29   38.50 
 -10  -1  -1   87.79   39.90 
  10  -1   1   64.49   37.30 
  10   1   1   95.79   37.90 
  10   1   1   87.89   44.40 
 -10   1  -1   92.59   47.50 
 -10   1  -1   79.99   38.70 
 -10   1  -1   84.49   44.90 
 -10   1  -1   97.59   35.70 
  10   1   1  108.59   40.60 
 -10   1  -1   42.10   31.10 
  10   1   1   71.49   33.40 
  10   1   1  109.09   43.80 
  10   1   1   81.19   37.70 
 -10   1  -1   72.19   42.20 
 -10   1  -1   76.29   35.50 
  10   1   1  118.09   42.80 
 -10   1  -1  170.78   55.19 
  10   1   1   66.89   36.30 
 -10   1  -1   88.09   38.90 
 -10  -2   1  535.65   85.09 
 -10  -2   1  533.95   78.49 
  10  -2  -1  556.74   91.69 
 -10  -2   1  464.55   77.39 
 -10  -2   1  430.96   86.89 
  10  -2  -1  471.05   81.49 
 -10  -2   1  367.76   78.79 
 -10  -2   1  640.24   81.59 
  10  -2  -1  500.45   85.59 
 -10  -2   1  536.85   84.89 
 -10  -2   1  561.34  101.39 
  10  -2  -1  516.75   81.99 
  10  -2  -1  468.35   81.49 
 -10  -2   1  552.74   92.29 
  10   2  -1  513.25   83.39 
 -10   2   1  574.94   99.69 
  10   2  -1  635.34   93.99 
 -10   2   1  417.76   72.29 
 -10   2   1  548.45   83.59 
 -10   2   1  438.96   76.99 
  10   2  -1  466.15   84.89 
  10   2  -1  566.84   93.49 
 -10   2   1  464.65   78.89 
  10   2  -1  571.84   92.89 
  10   2  -1  382.16   73.69 
  10   2  -1  625.04   99.49 
 -10   2   1  743.03   97.99 
 -10   2   1  561.54   90.29 
 -10   2   1  549.85   94.99 
 -10   2   1  416.16   80.39 
 -10   2   1  511.95   93.59 
  10   2  -1  530.85   88.59 
  -9  -2   1  663.83   91.09 
   9  -2  -1  749.82   92.39 
   9  -2  -1  894.31  102.39 
   9  -2  -1  756.52   96.99 
  -9  -2   1  558.64   94.09 
   9  -2  -1  620.64   85.69 
  -9  -2   1  730.33   86.69 
  -9  -2   1  812.22   94.89 
   9  -2  -1  955.60  105.39 
   9  -2  -1  732.33   96.19 
  -9  -2   1  800.72  111.79 
  -9  -2   1  701.53   86.29 
  -9  -2   1  907.81   92.59 
   9  -2  -1  666.03   83.59 
  -9  -2   1  892.91  102.49 
  -9  -2   1  714.83   82.99 
  -9  -2   1  453.75   80.19 
  -9   2   1  647.64   88.59 
   9   2  -1  704.43   89.99 
   9   2  -1  920.71   99.29 
   9   2  -1  976.40  103.49 
   9   2  -1  757.12   97.19 
   9   2  -1  709.53   92.09 
   9   2  -1  646.24   91.69 
  -9   2   1  752.42   97.59 
  -9   2   1  784.82   96.09 
  -9   2   1  768.32   84.59 
  -9   2   1  634.54   83.49 
  -9   2   1  808.12  106.79 
  -9   2   1  782.62   92.99 
  -9   2   1  749.03  101.69 
   9   2  -1  804.12   97.89 
   9   2  -1  930.41  107.19 
  -9   2   1  983.70  120.19 
   9   2  -1  782.22   91.59 
  -9   2   1  822.12  101.59 
  -9   2   1  854.71   92.49 
   9   2  -1  756.02   95.79 
   9   2  -1  938.21  106.09 
  -8  -2   1  173.78   46.80 
   8  -2  -1  184.08   44.20 
   8  -2  -1  249.58   50.29 
   8  -2  -1  136.29   37.30 
  -8  -2   1  298.77   48.40 
  -8  -2   1  259.27   49.20 
   8  -2  -1  174.88   44.30 
   8  -2  -1  167.68   43.40 
  -8  -2   1  230.68   43.70 
   8  -2  -1  290.47   62.99 
   8  -2  -1  262.67   54.09 
   8  -2  -1  204.08   39.60 
  -8  -2   1  240.48   44.10 
  -8  -2   1  220.78   58.09 
  -8  -2   1  218.98   50.79 
  -8  -2   1  200.78   40.90 
  -8  -2   1  198.78   46.20 
   8  -2  -1  177.38   43.10 
  -8  -2   1  175.58   41.10 
  -8  -2   1  205.58   54.69 
   8   2  -1  236.68   52.79 
  -8   2   1  176.98   48.10 
  -8   2   1  200.68   44.50 
   8   2  -1  268.47   54.09 
   8   2  -1  154.58   36.00 
  -8   2   1  242.48   55.09 
  -8   2   1  209.48   46.20 
   8   2  -1  257.97   57.59 
  -8   2   1  284.27   47.40 
  -8   2   1  293.67   61.39 
   8   2  -1  224.08   45.60 
   8   2  -1  264.67   51.69 
   8   2  -1  210.68   50.99 
   8   2  -1  193.68   48.50 
  -8   2   1  251.37   51.99 
  -8   2   1  186.68   38.50 
  -8   2   1  310.77   46.40 
  -8   2   1  154.08   35.60 
   8   2  -1  246.88   51.69 
  -8   2   1  206.88   38.70 
   8   2  -1  227.68   51.49 
  -8   2   1  266.17   49.30 
   8   2  -1  276.77   53.59 
  -8   2   1  176.08   40.00 
   7  -2  -1  493.15   49.50 
   7  -2  -1  491.05   66.79 
  -7  -2   1  409.86   53.39 
   7  -2  -1  417.36   58.09 
   7  -2  -1  390.36   50.59 
  -7  -2   1  474.05   73.49 
  -7  -2   1  397.26   69.89 
  -7  -2   1  460.95   55.89 
  -7  -2   1  507.65   64.99 
   7  -2  -1  519.45   68.29 
   7  -2  -1  424.06   58.79 
  -7  -2   1  485.85   66.19 
   7  -2  -1  461.35   43.60 
  -7  -2   1  365.66   51.59 
   7  -2  -1  286.77   50.49 
  -7  -2   1  417.06   67.69 
  -7  -2   1  396.36   54.09 
  -7  -2   1  386.06   55.69 
   7  -2  -1  411.06   58.19 
   7  -2  -1  366.96   39.80 
  -7  -2   1  427.46   54.99 
   7  -2  -1  401.36   55.89 
   7  -2  -1  577.14   57.19 
   7   2  -1  469.05   49.99 
  -7   2   1  374.66   54.49 
  -7   2   1  515.55   48.00 
   7   2  -1  465.05   67.49 
  -7   2   1  360.46   48.40 
  -7   2   1  384.16   63.49 
  -7   2   1  314.57   53.09 
  -7   2   1  476.15   56.69 
  -7   2   1  471.15   65.89 
  -7   2   1  418.56   55.19 
  -7   2   1  498.95   57.99 
   7   2  -1  458.65   64.59 
   7   2  -1  319.67   51.09 
   7   2  -1  419.06   58.29 
  -7   2   1  453.45   47.90 
  -7   2   1  475.35   38.60 
   7   2  -1  436.96   64.19 
  -7   2   1  424.76   51.19 
  -7   2   1  454.85   54.89 
  -7   2   1  419.36   33.90 
  -7   2   1  457.35   67.29 
   7   2  -1  330.97   54.29 
   7   2  -1  443.96   48.40 
   7   2  -1  479.85   61.99 
   7   2  -1  429.76   55.99 
   7   2  -1  336.17   58.89 
   7   2  -1  476.05   65.69 
   7   2  -1  455.25   67.19 
   6  -2  -1  384.16   51.09 
  -6  -2   1  457.85   50.89 
   6  -2  -1  504.85   50.69 
   6  -2  -1  424.56   54.69 
  -6  -2   1  433.76   54.19 
   6  -2  -1  478.45   58.69 
  -6  -2   1  527.75   73.49 
   6  -2  -1  572.94   69.49 
   6  -2  -1  354.06   50.39 
   6  -2  -1  422.46   53.69 
  -6  -2   1  414.86   59.79 
  -6  -2   1  330.37   46.80 
   6  -2  -1  580.74   60.79 
  -6  -2   1  453.45   52.69 
   6  -2  -1  346.87   49.99 
   6  -2  -1  350.96   36.20 
   6  -2  -1  483.15   49.80 
  -6  -2   1  392.86   58.69 
   6  -2  -1  569.74   64.99 
   6  -2  -1  370.16   36.80 
  -6  -2   1  425.96   52.69 
  -6  -2   1  406.26   48.60 
   6  -2  -1  453.15   44.60 
  -6  -2   1  374.46   46.50 
  -6  -2   1  368.86   51.59 
  -6  -2   1  421.76   54.99 
  -6   2   1  367.06   54.39 
  -6   2   1  474.95   66.19 
  -6   2   1  443.76   33.40 
   6   2  -1  469.25   62.79 
   6   2  -1  385.76   54.19 
   6   2  -1  422.86   54.19 
  -6   2   1  417.06   21.80 
   6   2  -1  358.16   51.29 
  -6   2   1  457.75   48.30 
   6   2  -1  398.56   43.20 
  -6   2   1  410.86   48.40 
   6   2  -1  418.56   32.40 
  -6   2   1  432.06   57.89 
   6   2  -1  409.86   22.40 
   6   2  -1  464.25   61.89 
   6   2  -1  450.75   56.09 
   6   2  -1  471.25   60.39 
  -6   2   1  456.15   51.09 
  -6   2   1  350.76   44.90 
   6   2  -1  406.56   22.60 
   6   2  -1  390.96   20.60 
   6   2  -1  514.45   56.59 
  -6   2   1  421.86   46.70 
   6   2  -1  405.06   54.09 
  -6   2   1  440.46   55.39 
  -6   2   1  400.86   53.79 
  -6   2   1  421.26   28.40 
  -6   2   1  400.16   49.99 
  -6   2   1  494.85   35.10 
   6   2  -1  393.36   44.70 
  -6   2   1  345.67   36.00 
   6   2  -1  370.76   52.89 
  -6   2   1  413.96   34.20 
  -6   2   1  389.06   30.80 
   6   2  -1  398.46   31.90 
  -6   2   1  419.66   23.30 
   6   2  -1  404.96   53.79 
   6   2  -1  398.86   21.40 
   5  -2  -1 1271.97   59.39 
   5  -2  -1 1208.08   72.09 
  -5  -2   1 1253.87   70.29 
   5  -2  -1 1089.19   71.19 
   5  -2  -1 1176.68   65.69 
   5  -2  -1 1148.09   70.49 
   5  -2  -1 1131.59   74.69 
  -5  -2   1 1191.38   71.29 
  -5  -2   1 1105.89   72.59 
   5  -2  -1 1117.49   51.39 
   5  -2  -1 1134.49   69.89 
   5  -2  -1 1198.88   73.99 
   5  -2  -1 1223.58   62.69 
   5  -2  -1 1189.38   54.19 
  -5  -2   1 1108.59   49.40 
   5  -2  -1 1215.28   71.59 
  -5  -2   1 1111.29   41.90 
  -5  -2   1 1387.96   80.49 
  -5  -2   1 1023.10   65.79 
   5  -2  -1 1161.78   70.59 
   5  -2  -1 1228.58   70.69 
   5  -2  -1 1285.57   75.49 
  -5  -2   1 1165.68   80.79 
  -5  -2   1  987.60   74.39 
  -5  -2   1 1027.10   64.79 
   5  -2  -1 1274.67   76.09 
  -5  -2   1 1165.58   70.99 
   5  -2  -1 1048.40   60.49 
   5  -2  -1 1116.19   58.89 
  -5  -2   1  987.70   67.49 
  -5   2   1 1186.18   57.49 
  -5   2   1 1082.09   68.19 
   5   2  -1 1159.28   48.40 
   5   2  -1 1148.29   75.99 
  -5   2   1 1216.88   69.39 
   5   2  -1 1122.89   60.59 
  -5   2   1 1148.89   57.39 
  -5   2   1 1154.78   75.59 
  -5   2   1 1110.59   48.50 
   5   2  -1 1125.69   70.99 
  -5   2   1 1043.90   62.09 
  -5   2   1 1124.09   67.29 
   5   2  -1 1138.99   61.69 
   5   2  -1 1208.38   50.89 
   5   2  -1 1154.08   72.99 
  -5   2   1 1210.68   55.09 
  -5   2   1 1094.09   48.60 
  -5   2   1 1114.69   50.29 
  -5   2   1 1071.59   62.39 
   5   2  -1 1112.59   47.10 
  -5   2   1 1166.28   52.79 
  -5   2   1 1197.28   55.69 
   5   2  -1 1142.19   73.09 
   5   2  -1 1317.17   72.69 
   5   2  -1 1261.37   78.89 
  -5   2   1 1241.98   67.59 
   5   2  -1 1116.19   58.99 
  -5   2   1 1206.18   54.99 
   5   2  -1 1167.18   73.39 
  -5   2   1 1189.78   55.89 
   5   2  -1 1269.77   72.79 
  -5   2   1 1174.78   60.99 
   5   2  -1 1202.18   75.09 
   5   2  -1 1072.99   70.29 
  -5   2   1 1192.08   55.69 
   5   2  -1 1119.79   62.99 
   5   2  -1 1058.79   71.29 
  -4  -2   1  781.42   38.80 
   4  -2  -1  761.72   42.00 
  -4  -2   1  654.53   47.00 
  -4  -2   1  755.02   53.79 
   4  -2  -1  754.32   50.99 
   4  -2  -1  823.72   53.09 
   4  -2  -1  681.43   46.40 
   4  -2  -1  740.43   47.70 
  -4  -2   1  791.52   49.00 
  -4  -2   1  699.33   55.69 
   4  -2  -1  758.72   49.80 
   4  -2  -1  615.84   36.50 
   4  -2  -1  728.93   44.00 
   4  -2  -1  735.13   45.30 
   4  -2  -1  782.72   41.80 
  -4  -2   1  719.73   54.79 
   4  -2  -1  761.42   52.99 
  -4  -2   1  680.63   28.90 
  -4  -2   1  607.54   47.70 
   4  -2  -1  786.32   49.70 
  -4  -2   1  740.73   28.30 
   4  -2  -1  636.54   48.40 
  -4  -2   1  771.82   58.39 
  -4  -2   1  720.53   51.19 
  -4  -2   1  659.73   47.20 
  -4  -2   1  755.32   50.89 
  -4  -2   1  679.13   51.39 
   4  -2  -1  864.81   53.39 
   4  -2  -1  701.53   47.90 
   4  -2  -1  802.12   52.09 
   4  -2  -1  716.83   42.10 
   4  -2  -1  730.83   49.90 
  -4   2   1  710.83   36.10 
   4   2  -1  706.43   32.80 
  -4   2   1  659.93   36.10 
   4   2  -1  694.73   51.19 
   4   2  -1  718.33   36.50 
   4   2  -1  699.83   50.29 
  -4   2   1  672.93   46.90 
  -4   2   1  715.33   34.10 
   4   2  -1  713.43   45.00 
  -4   2   1  687.03   47.90 
  -4   2   1  744.53   36.80 
  -4   2   1  759.62   40.40 
   4   2  -1  783.22   52.69 
   4   2  -1  793.62   45.70 
  -4   2   1  684.53   43.40 
  -4   2   1  713.83   38.40 
  -4   2   1  730.93   39.90 
  -4   2   1  672.33   46.50 
   4   2  -1  676.93   50.49 
   4   2  -1  691.83   45.70 
   4   2  -1  737.43   45.40 
  -4   2   1  743.33   47.10 
   4   2  -1  871.21   56.89 
  -4   2   1  722.23   48.70 
  -4   2   1  760.92   51.49 
   4   2  -1  727.03   38.00 
  -4   2   1  764.32   46.40 
  -4   2   1  728.73   41.80 
   4   2  -1  759.02   36.40 
   4   2  -1  688.43   50.09 
   4   2  -1  720.13   50.49 
  -4   2   1  718.23   37.00 
   4   2  -1  755.02   49.60 
   4   2  -1  685.33   52.69 
  -4   2   1  750.72   40.00 
  -4   2   1  749.62   45.70 
   4   2  -1  741.83   51.89 
  -4   2   1  711.83   45.60 
   4   2  -1  637.54   46.60 
  -4   2   1  727.63   38.20 
  -4   2   1  757.52   37.50 
   3  -2  -1  218.38   27.60 
  -3  -2   1  276.07   22.40 
  -3  -2   1  266.67   15.40 
  -3  -2   1  269.77   32.30 
   3  -2  -1  215.48   26.10 
   3  -2  -1  250.37   30.40 
  -3  -2   1  267.47   31.70 
   3  -2  -1  313.17   34.50 
  -3  -2   1  273.87   36.40 
   3  -2  -1  280.57   29.60 
  -3  -2   1  258.67   31.80 
  -3  -2   1  248.38   31.60 
  -3  -2   1  254.57   27.30 
  -3  -2   1  373.86   44.10 
   3  -2  -1  285.07   32.80 
  -3  -2   1  304.87   35.70 
   3  -2  -1  294.77   32.50 
   3  -2  -1  268.17   30.80 
   3  -2  -1  292.97   31.40 
  -3  -2   1  239.68   29.20 
   3  -2  -1  317.67   33.90 
  -3  -2   1  189.48   26.70 
  -3  -2   1  270.87   34.20 
   3  -2  -1  231.88   29.40 
   3  -2  -1  260.77   25.80 
   3  -2  -1  250.17   28.80 
   3  -2  -1  262.57   22.70 
   3  -2  -1  219.08   26.00 
   3  -2  -1  259.87   20.40 
   3  -2  -1  299.47   25.10 
  -3  -2   1  279.97   28.60 
   3   2  -1  254.77   29.30 
  -3   2   1  297.47   22.30 
   3   2  -1  281.57   15.70 
  -3   2   1  268.17   29.90 
  -3   2   1  244.78   28.50 
   3   2  -1  239.58   31.60 
  -3   2   1  260.37   28.50 
   3   2  -1  273.57   33.40 
   3   2  -1  233.48   31.50 
  -3   2   1  288.87   23.00 
  -3   2   1  230.08   26.80 
  -3   2   1  289.87   30.40 
  -3   2   1  249.38   17.60 
  -3   2   1  318.17   32.30 
   3   2  -1  303.47   33.30 
   3   2  -1  247.18   31.60 
  -3   2   1  240.28   30.30 
  -3   2   1  286.37   31.10 
  -3   2   1  280.77   18.20 
   3   2  -1  264.47   31.10 
   3   2  -1  348.87   35.90 
   3   2  -1  271.87   16.10 
   3   2  -1  265.07   22.00 
  -3   2   1  277.17   31.00 
  -3   2   1  300.67   30.40 
   3   2  -1  253.97   29.30 
   3   2  -1  303.17   32.30 
   3   2  -1  272.37   21.00 
  -3   2   1  262.97   26.10 
   3   2  -1  200.48   29.00 
   3   2  -1  250.77   18.90 
  -3   2   1  249.78   27.00 
  -3   2   1  270.87   22.00 
  -3   2   1  252.77   16.30 
  -3   2   1  288.87   23.10 
  -3   2   1  287.47   27.90 
   3   2  -1  240.98   29.00 
   3   2  -1  284.97   31.10 
   3   2  -1  248.08   31.60 
   2  -2  -1  135.59   17.10 
   2  -2  -1   77.19   13.90 
  -2  -2   1   98.49   17.10 
   2  -2  -1  103.99   16.00 
  -2  -2   1  102.29   11.80 
   2  -2  -1   85.89   15.90 
  -2  -2   1  111.09   19.10 
   2  -2  -1   84.79   14.80 
  -2  -2   1   90.49   17.40 
  -2  -2   1  101.49   17.90 
   2  -2  -1   91.99   14.50 
   2  -2  -1   80.09   15.60 
  -2  -2   1  130.59   18.90 
  -2  -2   1  111.09   21.00 
  -2  -2   1   77.49   15.90 
  -2  -2   1   85.59   13.30 
   2  -2  -1  109.79   16.00 
  -2  -2   1   66.49   16.20 
  -2  -2   1   93.79   16.70 
  -2  -2   1  116.99   18.90 
  -2  -2   1   96.49   14.70 
  -2  -2   1  104.09   17.20 
  -2  -2   1   94.49   17.30 
  -2  -2   1   96.19   17.20 
  -2  -2   1  105.69   18.40 
  -2  -2   1  136.49   21.50 
  -2  -2   1   67.19   12.80 
   2  -2  -1   88.49   17.40 
  -2  -2   1  107.39   18.40 
   2  -2  -1  101.99   16.50 
   2  -2  -1  106.39   16.20 
   2  -2  -1   85.79   15.00 
   2  -2  -1  103.59   17.00 
  -2  -2   1   89.69   16.90 
  -2  -2   1  127.19   20.40 
   2  -2  -1   98.99   14.30 
  -2  -2   1  110.89   15.50 
   2   2  -1   92.89   18.40 
   2   2  -1   60.09   13.90 
   2   2  -1   87.79   17.20 
   2   2  -1   80.09   15.00 
  -2   2   1   85.49    6.00 
   2   2  -1  103.89   16.50 
  -2   2   1   83.39   12.70 
  -2   2   1  107.99   16.00 
   2   2  -1   97.99   17.40 
   2   2  -1  104.39   15.70 
  -2   2   1  101.49   11.00 
  -2   2   1  126.19   19.50 
   2   2  -1   71.29   15.40 
   2   2  -1  108.99   19.20 
   2   2  -1   92.19   15.10 
  -2   2   1  114.39   14.80 
   2   2  -1  111.09   15.10 
   2   2  -1   74.49   17.20 
   2   2  -1   94.89   14.50 
   2   2  -1   98.59   12.20 
  -2   2   1   93.69   13.50 
   2   2  -1  102.79   15.10 
  -2   2   1   94.79   18.10 
   2   2  -1   98.19   17.60 
  -2   2   1  112.39   15.60 
  -2   2   1  121.29   17.70 
  -2   2   1  106.79   17.20 
  -2   2   1  128.29   19.40 
  -2   2   1   98.69   17.30 
  -2   2   1  104.79   16.30 
  -2   2   1   86.49   14.10 
  -2   2   1  100.79   11.40 
  -2   2   1   80.59   13.30 
  -2   2   1  101.49   15.50 
   2   2  -1   88.89   16.50 
  -2   2   1   86.49   14.90 
   2   2  -1   82.99   16.90 
   2   2  -1  121.09   14.70 
   2   2  -1  100.69   19.20 
  -2   2   1  109.89   14.60 
  -2   2   1   85.29   14.00 
  -2   2   1  106.79   17.60 
  -2   2   1   99.89    7.80 
   2   2  -1   94.99   14.00 
   2   2  -1  108.29   18.90 
  -2   2   1  126.49   18.70 
   2   2  -1  102.99   18.50 
   2   2  -1  105.99   18.40 
  -2   2   1  104.49   16.50 
  -2   2   1  122.29   18.50 
  -2   2   1  105.79   17.00 
  -2   2   1  113.19   15.20 
  -2   2   1   99.89   15.40 
  -1  -2   1    5.50    6.10 
   1  -2  -1    1.90    6.10 
  -1  -2   1   10.80    7.90 
  -1  -2   1    6.90    4.30 
  -1  -2   1    5.30    3.70 
   1  -2  -1    3.20    3.60 
  -1  -2   1    3.30    5.50 
   1  -2  -1    5.80    5.20 
  -1  -2   1   -0.80    5.50 
   1  -2  -1    8.70    7.00 
  -1  -2   1    3.60    5.50 
  -1  -2   1   11.40    6.60 
  -1  -2   1    7.00    4.90 
  -1  -2   1    6.80    6.40 
   1  -2  -1   14.30    6.40 
  -1  -2   1    7.20    6.00 
  -1  -2   1    7.90    6.30 
  -1  -2   1   11.80    6.90 
  -1  -2   1    8.50    6.20 
   1  -2  -1    1.00    4.00 
   1  -2  -1    4.70    6.40 
   1  -2  -1    3.70    4.40 
  -1  -2   1    2.90    5.40 
  -1  -2   1    4.30    6.10 
   1  -2  -1    0.50    4.70 
  -1  -2   1    4.70    5.60 
  -1  -2   1    5.20    5.10 
   1  -2  -1    2.70    3.70 
  -1  -2   1    3.60    4.80 
  -1  -2   1    5.90    6.40 
   1  -2  -1    8.70    5.00 
  -1  -2   1    9.90    6.70 
  -1  -2   1    5.50    4.90 
   1  -2  -1   -0.80    3.10 
   1  -2  -1    2.10    6.90 
  -1  -2   1    1.80    4.90 
  -1  -2   1   -4.40    4.10 
  -1  -2   1    4.30    3.70 
   1  -2  -1    7.00    7.30 
  -1  -2   1    8.50    7.10 
   1  -2  -1    3.80    7.00 
  -1  -2   1    2.00    5.60 
   1  -2  -1    2.10    4.10 
   1  -2  -1    4.30    3.80 
   1  -2  -1    9.10    6.70 
  -1   2   1    1.80    2.30 
   1   2  -1   10.80    6.80 
   1   2  -1    8.90    6.80 
   1   2  -1    4.10    5.00 
  -1   2   1   12.70    6.70 
  -1   2   1    5.00    3.50 
  -1   2   1   22.30    6.20 
   1   2  -1   -4.10    4.10 
   1   2  -1    6.30    6.40 
  -1   2   1    1.60    7.90 
   1   2  -1    3.20    5.40 
  -1   2   1    0.20    3.30 
   1   2  -1    4.80    5.80 
  -1   2   1    6.60    5.10 
  -1   2   1   -5.50    6.00 
   1   2  -1    7.40    3.90 
  -1   2   1   22.40    9.60 
   1   2  -1   14.80    8.20 
  -1   2   1    0.20    5.00 
  -1   2   1   12.00    6.70 
   1   2  -1    7.90    6.20 
  -1   2   1    7.10    5.60 
   1   2  -1   -0.10    3.90 
  -1   2   1    5.70    5.00 
  -1   2   1    6.70    6.60 
   1   2  -1    7.90    6.20 
   1   2  -1    3.80    3.60 
   1   2  -1   -2.10    4.30 
   1   2  -1    6.80    6.70 
  -1   2   1   31.10   14.00 
  -1   2   1    5.30    2.90 
  -1   2   1    6.50    6.20 
   1   2  -1    9.00    5.80 
   1   2  -1    1.30    4.00 
  -1   2   1    6.70    3.40 
   1   2  -1    2.40    5.40 
  -1   2   1   11.40    6.70 
  -1   2   1   19.40    8.70 
  -1   2   1    7.00    4.00 
   1   2  -1   -0.30    4.70 
   1   2  -1   13.10    5.40 
   1   2  -1    6.00    5.50 
   1   2  -1    3.00    5.80 
   1   2  -1    6.30    6.50 
   1   2  -1    4.20    6.40 
  -1   2   1   13.90    9.70 
  -1   2   1   -1.20    4.20 
  -1   2   1    2.00    3.40 
  -1   2   1    5.30    3.90 
   1   2  -1   -1.70    4.00 
  -1   2   1   14.40    5.20 
  -1   2   1   -1.00    5.10 
   1   2  -1    2.20    5.70 
   1   2  -1    2.50    5.60 
  -1   2   1    8.20    4.60 
   0  -2  -1   17.70    5.70 
   0  -2   1   13.90    6.30 
   0  -2   1   21.00   10.10 
   0  -2   1   18.30    8.50 
   0  -2  -1   12.30    7.00 
   0  -2  -1   15.20    6.70 
   0  -2   1   73.29   16.10 
   0  -2  -1    6.80    7.50 
   0  -2   1   14.40    7.50 
   0  -2  -1   14.40    6.90 
   0  -2   1    7.00   10.20 
   0  -2   1    9.60    6.60 
   0  -2   1   22.10    7.90 
   0  -2   1    9.60    7.40 
   0  -2  -1   16.30    6.70 
   0  -2   1    9.50    6.40 
   0  -2  -1   20.60    6.00 
   0  -2  -1   19.50    6.60 
   0  -2  -1   14.90    5.40 
   0  -2   1    5.10    4.10 
   0  -2   1   11.30    9.50 
   0  -2   1    5.10    5.10 
   0  -2   1   11.90   11.50 
   0  -2  -1   12.90   10.70 
   0  -2   1   15.90    7.30 
   0  -2   1    8.60    9.60 
   0  -2  -1   38.30   17.50 
   0  -2  -1   15.00    6.30 
   0  -2   1   13.40    6.30 
   0  -2  -1   12.50    6.50 
   0  -2  -1   14.30    6.80 
   0  -2  -1   11.60   13.30 
   0  -2  -1   14.50    5.80 
   0  -2  -1    7.10    7.30 
   0  -2  -1    6.80    6.50 
   0  -2   1    1.30    4.60 
   0  -2  -1   20.90   14.50 
   0   2   1   11.50    5.70 
   0   2   1   21.70    8.00 
   0   2   1   10.60    5.30 
   0   2   1   10.50    6.30 
   0   2  -1    3.10    4.80 
   0   2   1   13.40    4.60 
   0   2  -1   13.80    6.20 
   0   2   1   23.90   12.50 
   0   2  -1   17.30    8.70 
   0   2  -1    8.90    6.70 
   0   2   1   18.60    7.30 
   0   2   1   23.40    8.40 
   0   2  -1   13.70    3.80 
   0   2   1   21.90   12.80 
   0   2  -1   19.90    7.90 
   0   2  -1   11.20    5.90 
   0   2  -1   15.90    7.30 
   0   2  -1   11.70    5.50 
   0   2   1    9.10    4.90 
   0   2  -1    4.60    6.20 
   0   2   1   11.10    6.70 
   0   2  -1   14.40    6.40 
   0   2   1   16.30    7.10 
   0   2  -1    4.20    5.50 
   0   2  -1   13.50    6.70 
   0   2  -1   21.10    7.50 
   0   2  -1    9.80    6.30 
   0   2  -1   12.50    5.00 
   0   2  -1   16.70    8.20 
   0   2   1   11.70    4.60 
   0   2  -1   20.70    6.80 
   0   2   1   14.60    4.70 
   0   2   1    8.30    9.30 
   0   2  -1   14.90    6.80 
   0   2   1   12.10    3.30 
   0   2   1    4.70    5.90 
   0   2  -1    5.30    6.60 
   0   2  -1   13.40    7.60 
   0   2   1   13.30    5.90 
   0   2   1   11.40    5.90 
   0   2  -1   11.60    7.40 
   0   2   1    5.70    6.00 
   0   2   1   13.00    7.30 
   0   2   1   20.50    6.20 
   0   2   1   12.60    5.00 
  -1  -2  -1 1636.74   67.89 
  -1  -2  -1 1756.42   73.89 
  -1  -2  -1 1543.05   73.49 
  -1  -2  -1 1719.43   66.59 
  -1  -2  -1 1666.83   55.39 
  -1  -2  -1 1564.84   62.39 
   1  -2   1 1574.74   60.49 
   1  -2   1 1528.85   61.19 
   1  -2   1 1624.64   71.49 
   1  -2   1 1530.65   55.09 
  -1  -2  -1 1617.24   64.09 
  -1  -2  -1 1754.02   71.19 
   1  -2   1 1630.24   64.19 
  -1  -2  -1 1503.35   66.59 
  -1  -2  -1 1637.04   58.19 
   1  -2   1 1595.74   73.19 
   1  -2   1 1626.84   70.29 
  -1  -2  -1 1699.53   71.09 
   1  -2   1 1514.05   60.69 
   1  -2   1 1534.85   55.49 
  -1  -2  -1 1505.95   60.59 
   1  -2   1 1614.34   59.19 
   1  -2   1 1604.74   74.09 
  -1  -2  -1 1679.93   65.09 
  -1  -2  -1 1547.95   64.69 
   1  -2   1 1638.94   65.89 
  -1  -2  -1 1576.14   66.19 
  -1  -2  -1 1402.06   66.59 
  -1  -2  -1 1554.24   61.39 
  -1  -2  -1 1599.74   55.79 
  -1  -2  -1 1687.93   66.79 
  -1  -2  -1 1593.94   61.99 
   1  -2   1 1589.74   56.19 
  -1  -2  -1 1713.33   64.29 
  -1  -2  -1 1500.55   62.59 
   1  -2   1 1623.24   61.49 
  -1  -2  -1 1516.75   66.39 
  -1  -2  -1 1633.44   65.09 
  -1  -2  -1 1610.84   66.19 
  -1  -2  -1 1644.24   65.99 
  -1  -2  -1 1573.74   56.89 
   1  -2   1 1635.54   69.39 
   1  -2   1 1606.34   56.89 
  -1   2  -1 1433.66   73.69 
  -1   2  -1 1596.94   64.49 
  -1   2  -1 1596.34   58.99 
  -1   2  -1 1547.55   73.29 
   1   2   1 1577.94   61.29 
  -1   2  -1 1520.65   72.79 
   1   2   1 1629.64   61.89 
  -1   2  -1 1591.74   66.59 
   1   2   1 1641.14   68.89 
   1   2   1 1527.75   66.29 
  -1   2  -1 1620.34   61.29 
  -1   2  -1 1462.95   68.39 
   1   2   1 1673.93   64.89 
   1   2   1 1661.33   61.19 
  -1   2  -1 1591.14   63.49 
  -1   2  -1 1550.04   63.89 
  -1   2  -1 1504.15   64.69 
  -1   2  -1 1627.54   64.59 
  -1   2  -1 1561.04   61.39 
  -1   2  -1 1554.64   58.59 
   1   2   1 1594.54   57.99 
   1   2   1 1620.84   64.19 
  -1   2  -1 1602.94   56.59 
   1   2   1 1622.24   68.19 
   1   2   1 1666.13   67.29 
   1   2   1 1626.54   64.39 
  -1   2  -1 1617.84   55.39 
  -1   2  -1 1688.83   57.59 
   1   2   1 1610.04   65.99 
   1   2   1 1638.54   64.99 
   1   2   1 1605.84   62.89 
   1   2   1 1567.14   65.19 
  -1   2  -1 1531.85   59.69 
  -1   2  -1 1598.94   54.19 
  -1   2  -1 1648.83   65.39 
   1   2   1 1651.93   63.59 
  -1   2  -1 1653.83   55.59 
   1   2   1 1503.15   68.49 
  -1   2  -1 1600.64   54.99 
  -1   2  -1 1512.35   65.19 
   1   2   1 1636.74   67.69 
   1   2   1 1511.65   66.69 
   1   2   1 1570.14   65.09 
  -1   2  -1 1621.24   76.29 
  -1   2  -1 1490.85   65.79 
   1   2   1 1620.84   72.69 
  -1   2  -1 1677.13   66.09 
   1   2   1 1556.54   64.49 
   1   2   1 1598.84   56.99 
   1   2   1 1554.74   68.49 
   1   2   1 1697.53   65.99 
   1   2   1 1606.24   67.19 
  -2  -2  -1  711.13   42.50 
  -2  -2  -1  735.43   42.10 
   2  -2   1  756.72   38.50 
   2  -2   1  707.93   39.80 
   2  -2   1  762.42   27.70 
   2  -2   1  694.13   40.50 
  -2  -2  -1  777.22   44.10 
   2  -2   1  787.02   39.80 
   2  -2   1  769.22   45.70 
  -2  -2  -1  742.93   40.00 
  -2  -2  -1  771.92   37.50 
   2  -2   1  724.83   36.00 
  -2  -2  -1  725.73   43.70 
  -2  -2  -1  739.43   44.80 
  -2  -2  -1  726.63   37.60 
  -2  -2  -1  734.43   43.40 
   2  -2   1  784.02   47.70 
  -2  -2  -1  749.62   44.50 
  -2  -2  -1  772.82   38.00 
  -2  -2  -1  757.22   40.10 
  -2  -2  -1  762.72   43.10 
   2  -2   1  777.62   47.10 
   2  -2   1  713.53   43.10 
  -2  -2  -1  765.22   42.50 
   2  -2   1  824.82   37.70 
   2  -2   1  707.73   38.90 
  -2  -2  -1  787.52   45.80 
   2  -2   1  725.03   38.60 
  -2  -2  -1  817.82   41.30 
  -2  -2  -1  738.93   46.90 
  -2  -2  -1  928.21   53.29 
  -2  -2  -1  779.92   42.80 
   2  -2   1  809.82   34.50 
  -2  -2  -1  828.12   50.29 
   2  -2   1  734.43   32.90 
  -2  -2  -1  808.92   43.00 
  -2  -2  -1  659.13   42.20 
  -2   2  -1  770.42   38.90 
  -2   2  -1  754.82   43.80 
  -2   2  -1  778.52   47.40 
   2   2   1  863.31   45.10 
   2   2   1  784.52   44.40 
  -2   2  -1  716.73   31.40 
  -2   2  -1  723.03   39.30 
  -2   2  -1  764.62   29.60 
  -2   2  -1  797.92   39.30 
  -2   2  -1  764.92   39.50 
  -2   2  -1  773.02   35.50 
   2   2   1  738.83   43.30 
  -2   2  -1  733.23   43.20 
  -2   2  -1  754.12   36.50 
   2   2   1  738.53   27.00 
  -2   2  -1  765.22   29.60 
  -2   2  -1  775.52   41.90 
   2   2   1  741.03   44.80 
  -2   2  -1  726.83   42.80 
   2   2   1  782.12   40.50 
   2   2   1  809.72   45.60 
   2   2   1  826.22   48.70 
   2   2   1  717.33   41.60 
  -2   2  -1  778.52   38.00 
  -2   2  -1  831.52   44.80 
  -2   2  -1  704.13   34.10 
  -2   2  -1  797.82   36.10 
   2   2   1  757.62   42.70 
   2   2   1  761.02   40.60 
   2   2   1  783.42   39.60 
   2   2   1  796.02   45.00 
  -2   2  -1  749.33   38.30 
  -2   2  -1  685.03   42.80 
   2   2   1  808.22   46.60 
   2   2   1  800.42   44.50 
  -2   2  -1  772.52   46.10 
  -2   2  -1  732.63   32.50 
  -2   2  -1  864.41   48.90 
   2   2   1  783.92   27.60 
   2   2   1  769.82   43.60 
   2   2   1  766.32   41.60 
   2   2   1  775.02   42.00 
   2   2   1  708.33   47.00 
  -2   2  -1  758.72   40.90 
   2   2   1  817.22   44.30 
   2   2   1  838.42   40.10 
   2   2   1  696.73   45.10 
  -2   2  -1  776.12   42.00 
   2   2   1  730.03   44.00 
  -2   2  -1  737.53   32.50 
  -2   2  -1  680.13   38.60 
  -2   2  -1  807.12   45.20 
   2   2   1  747.73   38.30 
   2   2   1  829.62   38.10 
   2   2   1  816.42   46.10 
  -2   2  -1  850.61   44.00 
  -2   2  -1  795.42   39.10 
   3  -2   1 1208.18   65.09 
  -3  -2  -1 1085.99   57.99 
   3  -2   1 1217.58   57.99 
   3  -2   1 1343.77   60.89 
  -3  -2  -1 1279.97   67.19 
  -3  -2  -1 1222.08   54.99 
  -3  -2  -1 1202.48   70.79 
   3  -2   1 1195.98   46.70 
   3  -2   1 1148.19   48.90 
  -3  -2  -1 1239.08   72.09 
   3  -2   1 1170.88   60.39 
   3  -2   1 1243.48   54.59 
  -3  -2  -1 1206.58   63.89 
   3  -2   1 1183.78   63.79 
   3  -2   1 1070.49   59.29 
  -3  -2  -1 1354.66   65.99 
  -3  -2  -1 1227.78   65.09 
  -3  -2  -1 1217.88   64.09 
   3  -2   1 1209.18   57.59 
   3  -2   1 1172.18   64.49 
   3  -2   1 1250.77   65.29 
  -3  -2  -1 1285.27   65.59 
   3  -2   1 1111.29   55.69 
   3  -2   1 1133.99   66.39 
  -3  -2  -1 1147.99   50.39 
  -3  -2  -1 1298.57   71.09 
   3  -2   1 1273.67   68.39 
  -3  -2  -1 1275.37   59.29 
   3  -2   1 1262.27   64.89 
   3   2   1 1133.19   59.89 
   3   2   1 1281.47   63.19 
  -3   2  -1 1239.78   56.09 
   3   2   1 1262.77   65.39 
  -3   2  -1 1257.47   44.60 
  -3   2  -1 1174.18   52.99 
   3   2   1 1197.38   67.19 
  -3   2  -1 1341.17   67.89 
   3   2   1 1235.08   66.19 
   3   2   1 1244.58   51.19 
  -3   2  -1 1268.87   51.39 
  -3   2  -1 1152.28   60.69 
   3   2   1 1288.87   65.39 
  -3   2  -1 1194.58   58.39 
  -3   2  -1 1199.58   57.69 
   3   2   1 1255.17   65.09 
   3   2   1 1324.27   62.69 
  -3   2  -1 1288.47   67.69 
   3   2   1 1327.97   65.39 
  -3   2  -1 1190.88   55.09 
   3   2   1 1243.88   54.29 
   3   2   1 1293.47   66.29 
   3   2   1 1149.78   59.19 
  -3   2  -1 1147.99   52.79 
  -3   2  -1 1285.57   68.19 
  -3   2  -1 1240.58   45.20 
  -3   2  -1 1363.86   60.79 
   3   2   1 1133.79   63.39 
  -3   2  -1 1177.18   61.99 
  -3   2  -1 1239.88   48.70 
  -3   2  -1 1245.28   55.29 
   3   2   1 1192.38   64.39 
  -3   2  -1 1163.38   62.09 
   3   2   1 1241.78   63.89 
   3   2   1 1352.56   62.99 
  -3   2  -1 1214.88   43.10 
  -3   2  -1 1191.28   45.00 
  -3   2  -1 1218.28   60.09 
   3   2   1 1258.87   72.09 
  -3   2  -1 1365.26   68.39 
  -3   2  -1 1173.08   52.39 
   3   2   1 1281.47   53.29 
  -4  -2  -1 1808.32   84.49 
   4  -2   1 1676.53   84.19 
  -4  -2  -1 1740.83   93.59 
   4  -2   1 1543.05   83.29 
  -4  -2  -1 1716.03   88.09 
   4  -2   1 1702.63   77.89 
   4  -2   1 1814.72   87.49 
  -4  -2  -1 1726.03   94.29 
   4  -2   1 1670.53   67.69 
   4  -2   1 1587.94   84.69 
  -4  -2  -1 1770.82   95.89 
   4  -2   1 1707.63   90.59 
  -4  -2  -1 1792.42   80.89 
   4  -2   1 1604.34   81.79 
   4  -2   1 1766.02   91.29 
  -4  -2  -1 1627.04   84.09 
  -4  -2  -1 1739.03   84.29 
   4  -2   1 1761.72   80.49 
  -4  -2  -1 1653.53   83.29 
   4  -2   1 1607.84   66.39 
   4  -2   1 1666.53   74.99 
   4  -2   1 1600.14   78.49 
   4  -2   1 1591.74   85.39 
  -4  -2  -1 1791.72   85.99 
   4  -2   1 1788.92   80.59 
   4  -2   1 1643.54   74.89 
   4  -2   1 1723.63   77.49 
   4  -2   1 1676.03   84.99 
  -4  -2  -1 1687.13   87.89 
   4   2   1 1747.63   87.19 
  -4   2  -1 1690.13   65.99 
   4   2   1 1660.93   76.49 
  -4   2  -1 1706.03   65.19 
   4   2   1 1700.73   84.99 
   4   2   1 1768.12   89.39 
  -4   2  -1 1681.73   67.59 
  -4   2  -1 1743.63   86.79 
   4   2   1 1645.94   71.39 
  -4   2  -1 1647.74   67.89 
  -4   2  -1 1633.04   68.59 
   4   2   1 1613.14   84.69 
   4   2   1 1722.53   63.49 
   4   2   1 1786.82   85.89 
  -4   2  -1 1745.23   76.99 
  -4   2  -1 1698.03   58.49 
  -4   2  -1 1585.74   66.09 
  -4   2  -1 1642.14   61.59 
   4   2   1 1776.92   91.19 
  -4   2  -1 1660.13   81.09 
   4   2   1 1615.94   83.39 
  -4   2  -1 1665.53   88.49 
  -4   2  -1 1678.83   58.19 
  -4   2  -1 1733.33   75.59 
   4   2   1 1721.73   89.09 
  -4   2  -1 1721.13   88.99 
   4   2   1 1694.43   80.69 
   4   2   1 1681.13   86.49 
   4   2   1 1758.92   63.89 
  -4   2  -1 1626.14   70.39 
  -4   2  -1 1551.24   82.99 
   4   2   1 1647.04   65.99 
   4   2   1 1673.53   82.29 
   4   2   1 1630.74   76.59 
  -4   2  -1 1566.04   81.39 
   4   2   1 1653.33   85.39 
   4   2   1 1608.64   83.69 
  -4   2  -1 1682.43   70.09 
  -4   2  -1 1769.22   88.59 
  -4   2  -1 1654.53   73.99 
   4   2   1 1675.93   66.89 
  -5  -2  -1 1517.15   85.09 
   5  -2   1 1550.94   92.59 
  -5  -2  -1 1405.76   78.39 
   5  -2   1 1567.54   73.09 
   5  -2   1 1348.57   77.59 
  -5  -2  -1 1545.85   84.29 
   5  -2   1 1501.05   74.39 
   5  -2   1 1450.35   59.99 
   5  -2   1 1394.86   65.89 
   5  -2   1 1382.76   81.09 
   5  -2   1 1480.35   83.59 
   5  -2   1 1489.65   86.49 
  -5  -2  -1 1542.05   95.09 
   5  -2   1 1448.06   60.19 
  -5  -2  -1 1546.15   88.59 
  -5  -2  -1 1526.75   81.29 
  -5  -2  -1 1449.35   92.79 
   5  -2   1 1482.85   90.39 
  -5  -2  -1 1519.65   89.59 
  -5  -2  -1 1428.76   80.19 
   5  -2   1 1596.84   87.79 
   5  -2   1 1413.46   84.39 
   5  -2   1 1455.65   86.49 
   5  -2   1 1642.54   82.29 
   5  -2   1 1492.75   85.99 
  -5  -2  -1 1406.16   92.89 
   5  -2   1 1425.46   73.29 
  -5  -2  -1 1360.86   79.49 
   5  -2   1 1616.74   81.19 
   5   2   1 1445.66   70.59 
   5   2   1 1513.05   54.59 
  -5   2  -1 1514.95   71.29 
   5   2   1 1478.45   59.59 
   5   2   1 1594.54   81.19 
  -5   2  -1 1455.95   89.09 
   5   2   1 1626.14   85.19 
  -5   2  -1 1472.75   60.99 
  -5   2  -1 1551.34   74.59 
  -5   2  -1 1463.85   87.89 
   5   2   1 1469.45   70.99 
  -5   2  -1 1490.95   84.79 
   5   2   1 1423.46   51.79 
  -5   2  -1 1544.55   88.09 
   5   2   1 1493.45   89.79 
  -5   2  -1 1565.94   88.99 
  -5   2  -1 1542.55   90.59 
  -5   2  -1 1487.95   54.89 
   5   2   1 1649.93   92.69 
  -5   2  -1 1622.94   84.99 
  -5   2  -1 1442.46   57.89 
  -5   2  -1 1426.16   78.39 
   5   2   1 1535.95   59.79 
   5   2   1 1405.36   84.49 
   5   2   1 1543.15   87.79 
  -5   2  -1 1532.85   65.29 
   5   2   1 1426.06   82.39 
  -5   2  -1 1512.25   59.89 
  -5   2  -1 1402.36   69.39 
   5   2   1 1607.44   89.89 
   5   2   1 1502.55   85.99 
   5   2   1 1517.85   67.49 
   5   2   1 1519.65   84.09 
  -5   2  -1 1450.65   65.19 
   5   2   1 1633.94   90.89 
  -5   2  -1 1471.75   60.99 
   5   2   1 1431.36   85.49 
   5   2   1 1462.45   53.99 
  -5   2  -1 1516.85   68.69 
   5   2   1 1421.96   83.09 
  -5   2  -1 1554.94   56.89 
   6  -2   1 1259.67   85.09 
   6  -2   1 1187.38   80.69 
   6  -2   1 1244.18   84.89 
   6  -2   1 1351.36   79.09 
   6  -2   1 1399.96   90.79 
   6  -2   1 1319.87   85.19 
  -6  -2  -1 1354.86   80.29 
   6  -2   1 1218.08   77.89 
  -6  -2  -1 1285.17   87.79 
   6  -2   1 1219.18   87.69 
  -6  -2  -1 1306.77   86.69 
   6  -2   1 1257.57   77.79 
  -6  -2  -1 1172.08   77.29 
   6  -2   1 1316.37   91.69 
  -6  -2  -1 1152.38   90.99 
   6  -2   1 1289.77   70.69 
  -6  -2  -1 1258.37   92.39 
   6  -2   1 1262.67   57.19 
   6  -2   1 1343.37   72.59 
  -6  -2  -1 1166.08   74.69 
  -6  -2  -1 1204.78   75.99 
  -6  -2  -1 1097.59   76.69 
  -6  -2  -1 1303.57   80.19 
  -6  -2  -1 1093.19   86.69 
   6  -2   1 1371.46   87.19 
   6  -2   1 1231.88   65.19 
  -6   2  -1 1218.48   57.99 
   6   2   1 1130.99   77.69 
  -6   2  -1 1404.46   87.79 
   6   2   1 1108.19   80.59 
  -6   2  -1 1242.28   79.49 
   6   2   1 1143.99   83.59 
  -6   2  -1 1145.59   83.39 
   6   2   1 1329.87   61.69 
   6   2   1 1357.86   77.89 
  -6   2  -1 1277.47   88.29 
   6   2   1 1169.18   80.09 
  -6   2  -1 1319.57   65.49 
  -6   2  -1 1217.28   56.69 
   6   2   1 1273.37   86.19 
   6   2   1 1170.28   81.29 
  -6   2  -1 1258.87   49.90 
  -6   2  -1 1347.07   68.09 
   6   2   1 1405.76   88.19 
   6   2   1 1237.38   60.39 
   6   2   1 1019.00   80.49 
  -6   2  -1 1289.57   76.09 
  -6   2  -1 1243.38   69.09 
   6   2   1 1213.18   81.59 
  -6   2  -1 1326.07   84.89 
  -6   2  -1 1439.76   79.99 
  -6   2  -1 1193.88   87.39 
   6   2   1 1176.38   83.79 
   6   2   1 1261.57   79.89 
  -6   2  -1 1360.26   88.69 
   6   2   1 1222.78   85.59 
  -7  -2  -1 1744.13  100.89 
   7  -2   1 1613.44  104.39 
   7  -2   1 1646.24   86.69 
   7  -2   1 1708.33   99.79 
   7  -2   1 1649.54  114.39 
  -7  -2  -1 1472.45  112.79 
  -7  -2  -1 1755.22  118.39 
   7  -2   1 1442.96  106.79 
  -7  -2  -1 1683.53   96.49 
   7  -2   1 1761.02  102.99 
   7  -2   1 1902.91  113.79 
  -7  -2  -1 1564.14   97.09 
  -7  -2  -1 1546.75   94.19 
  -7  -2  -1 1585.14   99.89 
   7  -2   1 1735.03  101.09 
   7  -2   1 1688.93  111.79 
   7  -2   1 1801.72  109.09 
  -7  -2  -1 1775.52  101.99 
  -7  -2  -1 1558.34  115.09 
   7  -2   1 1777.82  111.39 
   7  -2   1 1614.54   84.49 
  -7  -2  -1 1723.33  108.09 
  -7  -2  -1 1725.03  111.49 
   7  -2   1 1567.84  104.89 
   7  -2   1 1652.43   89.89 
   7   2   1 1730.43  109.69 
  -7   2  -1 1628.44  111.79 
  -7   2  -1 1769.02  112.99 
  -7   2  -1 1814.42   86.09 
  -7   2  -1 1853.21  110.89 
   7   2   1 1755.12  105.49 
  -7   2  -1 1736.43   77.29 
   7   2   1 1544.95  106.99 
  -7   2  -1 1592.94   93.29 
  -7   2  -1 1848.22  105.39 
  -7   2  -1 1639.54  112.29 
   7   2   1 1890.71  115.39 
  -7   2  -1 1648.54   93.49 
   7   2   1 1727.33  100.49 
   7   2   1 1701.73  106.09 
   7   2   1 1741.63   96.19 
  -7   2  -1 1631.54  109.79 
   7   2   1 1593.14  105.19 
   7   2   1 1814.52  115.19 
   7   2   1 1579.64  104.59 
   7   2   1 1726.63  109.99 
  -7   2  -1 1680.93   87.79 
  -7   2  -1 1685.93  110.39 
   7   2   1 1517.45   98.29 
  -7   2  -1 1524.95  102.99 
  -7   2  -1 1682.73  100.19 
  -7   2  -1 1713.23   86.19 
   8  -2   1  856.01   61.69 
  -8  -2  -1 1104.99  127.59 
   8  -2   1  916.71   95.29 
  -8  -2  -1  911.01   99.59 
   8  -2   1  917.11   90.79 
  -8  -2  -1  852.51   71.09 
  -8  -2  -1  923.21  110.29 
   8  -2   1  765.62   96.39 
   8  -2   1  797.32   97.89 
   8  -2   1  913.21   97.19 
   8  -2   1  732.63   87.89 
   8  -2   1  851.61   61.69 
  -8  -2  -1  938.81  103.59 
  -8  -2  -1  907.31   70.39 
  -8  -2  -1  852.61   87.09 
   8  -2   1  957.00  101.39 
   8  -2   1  837.22   87.69 
  -8  -2  -1  953.30  115.29 
  -8  -2  -1  819.72   80.79 
  -8  -2  -1  972.60   93.59 
  -8  -2  -1 1000.30  100.89 
   8   2   1 1043.20  109.69 
  -8   2  -1 1107.59  100.59 
  -8   2  -1  753.72   96.69 
  -8   2  -1 1049.40  110.89 
   8   2   1  970.60  100.39 
  -8   2  -1  872.01   67.29 
  -8   2  -1  786.32   94.99 
   8   2   1  905.81   98.59 
  -8   2  -1  913.31   99.19 
   8   2   1  785.72   90.99 
  -8   2  -1  956.30   69.39 
   8   2   1  969.30  107.19 
  -8   2  -1  840.22   86.39 
  -8   2  -1  854.41   87.19 
   8   2   1  817.12   95.39 
   8   2   1  757.02   85.49 
   8   2   1  913.31   74.29 
   8   2   1  858.71   96.29 
  -8   2  -1  997.60   90.49 
   8   2   1  915.51  103.69 
   8   2   1  815.12   66.69 
  -8   2  -1  924.61   71.89 
  -8   2  -1  838.42   99.29 
  -8   2  -1  879.91   96.49 
  -9  -2  -1 1191.28  117.39 
  -9  -2  -1 1266.27  104.39 
   9  -2   1 1114.29  126.69 
   9  -2   1 1161.38  122.69 
  -9  -2  -1 1339.47  121.69 
   9  -2   1 1129.29   94.49 
  -9  -2  -1 1216.98   92.59 
  -9  -2  -1  913.51   97.39 
  -9  -2  -1 1246.58  134.79 
  -9  -2  -1 1201.48  118.59 
  -9  -2  -1 1192.78  131.09 
   9  -2   1  966.70  107.09 
  -9  -2  -1  927.51  117.39 
   9  -2   1 1214.98   98.49 
  -9  -2  -1 1352.56  110.49 
   9  -2   1 1385.56  111.49 
  -9  -2  -1 1249.57   92.49 
  -9   2  -1 1035.70  121.69 
  -9   2  -1 1113.29  109.69 
   9   2   1 1506.25  144.99 
   9   2   1 1141.29  123.09 
  -9   2  -1  834.82  109.59 
   9   2   1 1091.09  120.39 
  -9   2  -1 1260.17  111.49 
   9   2   1 1100.29  111.09 
  -9   2  -1 1229.48  128.99 
  -9   2  -1 1343.17  113.59 
   9   2   1 1034.70  114.09 
   9   2   1 1453.65  144.49 
   9   2   1 1034.40  111.09 
   9   2   1  952.20  102.39 
  -9   2  -1 1101.89  111.19 
   9   2   1 1151.38  121.59 
  -9   2  -1 1072.29  107.29 
  -9   2  -1 1005.20  111.29 
  -9   2  -1  927.51  107.49 
 -10  -2  -1  491.55   77.89 
 -10  -2  -1  420.06   85.09 
  10  -2   1  546.55   90.59 
 -10  -2  -1  452.55   97.19 
  10  -2   1  433.96   87.79 
 -10  -2  -1  307.57   67.59 
 -10  -2  -1  516.75   78.99 
 -10  -2  -1  398.96   87.79 
 -10  -2  -1  543.85   78.39 
 -10  -2  -1  497.15   82.19 
  10  -2   1  499.35   87.29 
  10  -2   1  400.86   73.59 
  10  -2   1  522.25   86.19 
 -10  -2  -1  457.35   85.59 
 -10  -2  -1  481.65   78.29 
 -10   2  -1  425.16   71.89 
 -10   2  -1  509.45   93.39 
  10   2   1  387.96   74.29 
 -10   2  -1  374.86   72.89 
 -10   2  -1  439.16   87.99 
 -10   2  -1  372.76   66.89 
  10   2   1  497.75   85.99 
 -10   2  -1  337.17   70.39 
 -10   2  -1  625.64  103.99 
  10   2   1  388.56   76.89 
 -10   2  -1  444.66   78.69 
 -10   2  -1  451.75   88.99 
  10   2   1  455.75   82.89 
  10   2   1  505.75   79.99 
  10   2   1  553.04   95.19 
 -10   2  -1  544.25   81.19 
 -10   2  -1  505.85   89.29 
  10   2   1  397.06   74.49 
  10   2   1  480.65   82.49 
  -9  -3   1   64.79   31.30 
  -9  -3   1   46.80   27.70 
   9  -3  -1    2.60   21.70 
   9  -3  -1   71.89   33.10 
  -9  -3   1   46.70   28.10 
  -9  -3   1   47.90   30.60 
  -9  -3   1   64.49   31.30 
  -9  -3   1   44.10   32.50 
   9  -3  -1   42.10   26.00 
  -9  -3   1   92.49   41.60 
  -9  -3   1   31.50   26.50 
   9  -3  -1   40.10   32.40 
   9  -3  -1   11.20   26.30 
  -9  -3   1   33.70   27.90 
   9  -3  -1   41.00   29.60 
  -9  -3   1   14.70   22.30 
  -9  -3   1   76.19   30.50 
  -9   3   1   58.99   34.40 
  -9   3   1   35.10   27.60 
  -9   3   1   32.20   27.40 
   9   3  -1   30.30   23.40 
   9   3  -1   76.39   32.40 
  -9   3   1   53.49   31.40 
   9   3  -1   10.80   26.10 
  -9   3   1   54.49   30.10 
   9   3  -1   45.20   29.20 
  -9   3   1   89.59   34.90 
  -9   3   1   24.70   25.50 
  -9   3   1   27.10   28.70 
  -9   3   1   37.40   31.30 
   9   3  -1  113.49   38.30 
  -9   3   1    3.60   21.10 
   9   3  -1   66.69   36.40 
  -9   3   1   77.09   30.10 
   9   3  -1   38.90   28.30 
   9   3  -1   61.99   32.50 
   9   3  -1   13.30   22.30 
  -9   3   1    8.60   18.30 
   9   3  -1   49.70   29.60 
   9   3  -1   89.19   36.50 
  -8  -3   1  118.99   37.50 
  -8  -3   1   47.80   23.10 
  -8  -3   1   86.09   31.70 
   8  -3  -1   64.99   28.70 
   8  -3  -1   44.00   26.80 
  -8  -3   1   51.99   31.50 
  -8  -3   1   88.39   35.90 
  -8  -3   1  117.19   38.50 
   8  -3  -1   49.99   26.00 
  -8  -3   1   37.10   23.80 
  -8  -3   1   28.20   28.90 
   8  -3  -1   52.19   26.90 
  -8  -3   1   47.10   24.70 
   8  -3  -1   45.20   25.70 
  -8  -3   1   11.80   25.50 
   8  -3  -1   46.40   28.20 
  -8  -3   1   59.59   26.20 
   8  -3  -1   59.29   33.10 
  -8   3   1   52.69   25.70 
   8   3  -1   61.69   29.70 
   8   3  -1   41.50   25.00 
   8   3  -1   50.89   28.60 
   8   3  -1   99.39   33.80 
   8   3  -1   60.29   27.60 
  -8   3   1   64.79   29.60 
  -8   3   1   73.79   29.10 
  -8   3   1   78.99   31.40 
  -8   3   1   61.09   26.60 
   8   3  -1   70.29   34.30 
  -8   3   1   97.69   38.70 
  -8   3   1   92.99   31.50 
   8   3  -1   82.09   31.60 
  -8   3   1   94.49   33.70 
   8   3  -1   51.39   29.50 
   8   3  -1   74.69   32.40 
  -8   3   1  129.99   40.20 
  -8   3   1  104.49   29.30 
  -8   3   1   83.39   33.10 
  -8   3   1   49.99   23.30 
  -8   3   1   74.19   35.60 
   8   3  -1   71.19   29.10 
  -8   3   1  107.89   40.10 
   8   3  -1  125.99   43.40 
  -7  -3   1  599.24   87.09 
  -7  -3   1  476.25   60.49 
   7  -3  -1  468.45   61.89 
   7  -3  -1  335.47   55.19 
   7  -3  -1  502.15   66.19 
  -7  -3   1  570.24   68.29 
  -7  -3   1  342.77   60.99 
  -7  -3   1  434.66   56.49 
  -7  -3   1  598.64   75.79 
  -7  -3   1  461.25   62.69 
  -7  -3   1  524.15   63.49 
  -7  -3   1  549.85   71.39 
   7  -3  -1  433.26   63.89 
   7  -3  -1  485.55   63.69 
   7  -3  -1  382.56   55.99 
   7  -3  -1  551.14   60.19 
   7  -3  -1  586.34   70.59 
  -7  -3   1  731.23   83.79 
  -7  -3   1  500.45   80.79 
   7  -3  -1  572.04   71.39 
  -7   3   1  652.73   80.89 
   7   3  -1  384.26   56.19 
  -7   3   1  622.74   72.79 
   7   3  -1  479.85   55.09 
   7   3  -1  462.25   67.39 
  -7   3   1  764.12   87.39 
   7   3  -1  525.25   67.49 
  -7   3   1  487.85   58.69 
  -7   3   1  558.14   74.09 
   7   3  -1  552.44   74.79 
  -7   3   1  376.16   54.19 
  -7   3   1  426.16   56.99 
  -7   3   1  607.04   71.29 
  -7   3   1  571.84   59.79 
  -7   3   1  553.44   65.49 
  -7   3   1  588.94   62.39 
  -7   3   1  437.46   67.99 
  -7   3   1  480.15   62.99 
  -7   3   1  559.64   68.39 
   7   3  -1  652.93   74.39 
   7   3  -1  483.95   42.80 
   7   3  -1  448.76   66.69 
  -7   3   1  724.63   85.99 
   7   3  -1  452.95   62.69 
  -7   3   1  497.25   41.40 
   7   3  -1  491.25   73.59 
   7   3  -1  517.15   67.99 
   7   3  -1  522.85   68.49 
   7   3  -1  513.15   68.69 
   7   3  -1  504.95   58.39 
  -6  -3   1  950.70   72.29 
  -6  -3   1  949.01   67.29 
   6  -3  -1 1018.20   73.29 
   6  -3  -1  918.91   68.69 
  -6  -3   1  864.01   78.79 
  -6  -3   1  966.60   69.99 
   6  -3  -1  935.51   69.29 
   6  -3  -1  951.40   65.59 
  -6  -3   1  885.21   73.99 
   6  -3  -1 1047.30   61.79 
  -6  -3   1 1069.09   79.29 
  -6  -3   1  846.12   69.29 
   6  -3  -1  913.51   71.99 
   6  -3  -1 1004.60   77.09 
   6  -3  -1  972.10   70.29 
   6  -3  -1 1047.70   73.69 
   6  -3  -1 1079.29   76.99 
   6  -3  -1 1081.09   79.29 
   6  -3  -1 1044.80   72.19 
  -6  -3   1  950.50   82.19 
  -6  -3   1 1017.20   74.39 
  -6  -3   1  920.21   78.29 
   6  -3  -1  988.60   70.69 
  -6   3   1  928.21   74.59 
  -6   3   1 1038.90   65.19 
   6   3  -1 1012.70   41.80 
  -6   3   1 1004.50   51.29 
   6   3  -1  913.11   70.69 
  -6   3   1  975.70   75.89 
  -6   3   1 1042.90   55.39 
   6   3  -1  897.11   68.39 
   6   3  -1  987.30   75.19 
  -6   3   1  988.40   48.90 
  -6   3   1 1021.40   70.09 
  -6   3   1  925.91   71.09 
   6   3  -1  988.50   63.59 
   6   3  -1  952.70   76.59 
   6   3  -1  950.70   74.29 
  -6   3   1  958.00   75.39 
   6   3  -1  964.90   72.49 
   6   3  -1  966.50   73.99 
   6   3  -1  950.70   73.29 
  -6   3   1  918.41   63.79 
  -6   3   1  942.01   69.19 
  -6   3   1 1088.79   53.19 
   6   3  -1 1057.99   81.59 
   6   3  -1  968.20   49.60 
  -6   3   1 1045.80   72.19 
  -6   3   1  957.90   74.09 
   6   3  -1  931.51   63.49 
   6   3  -1  888.21   71.09 
  -6   3   1  862.31   48.70 
  -6   3   1  949.31   75.69 
   6   3  -1  929.91   62.49 
  -6   3   1  960.70   52.19 
   6   3  -1  990.30   74.79 
  -6   3   1  963.10   69.19 
  -6   3   1  982.70   70.99 
  -6   3   1  890.61   66.19 
  -6   3   1  914.81   62.19 
  -5  -3   1 2746.13  115.69 
   5  -3  -1 2379.06  100.19 
   5  -3  -1 2579.04  115.49 
  -5  -3   1 2587.14  115.49 
  -5  -3   1 2452.05  128.89 
   5  -3  -1 2592.94  117.79 
   5  -3  -1 2466.85  114.89 
  -5  -3   1 2445.26  124.09 
  -5  -3   1 2604.84  120.89 
   5  -3  -1 2421.66  117.39 
  -5  -3   1 2517.15  131.99 
   5  -3  -1 2794.72  126.09 
   5  -3  -1 2431.96  118.69 
   5  -3  -1 2474.65  118.99 
   5  -3  -1 2631.34  125.69 
   5  -3  -1 2487.15  106.09 
  -5  -3   1 2510.45  124.99 
   5  -3  -1 2588.84  118.39 
  -5  -3   1 2632.04  123.69 
   5  -3  -1 2602.94  116.39 
   5  -3  -1 2583.04  118.89 
  -5  -3   1 2666.23  136.19 
  -5  -3   1 2519.35  101.49 
  -5  -3   1 2654.63  123.19 
  -5  -3   1 2560.54  124.29 
   5  -3  -1 2580.74  110.89 
  -5   3   1 2658.23  104.89 
   5   3  -1 2565.24  114.59 
   5   3  -1 2482.55   98.49 
  -5   3   1 2561.74  120.69 
  -5   3   1 2442.86  120.19 
  -5   3   1 2560.24   99.19 
   5   3  -1 2430.16  119.39 
  -5   3   1 2534.85  109.29 
   5   3  -1 2624.24  122.49 
   5   3  -1 2520.35  101.69 
   5   3  -1 2386.56  121.69 
  -5   3   1 2561.44  120.09 
   5   3  -1 2512.25  120.79 
   5   3  -1 2639.94  118.49 
   5   3  -1 2524.35  122.79 
   5   3  -1 2606.04   93.89 
   5   3  -1 2319.87  122.19 
  -5   3   1 2493.15  113.19 
  -5   3   1 2453.55  114.79 
  -5   3   1 2430.66   90.19 
   5   3  -1 2399.76  112.99 
  -5   3   1 2546.35  109.79 
  -5   3   1 2580.44   96.59 
  -5   3   1 2459.85  109.39 
   5   3  -1 2496.95  125.09 
  -5   3   1 2533.95   99.99 
   5   3  -1 2566.84  121.49 
  -5   3   1 2514.05  116.29 
  -5   3   1 2472.25   99.99 
   5   3  -1 2430.36  121.59 
   5   3  -1 2411.76  110.89 
  -5   3   1 2507.85   90.79 
  -5   3   1 2656.43   95.89 
  -5   3   1 2564.34   89.99 
  -5   3   1 2406.16   97.19 
  -5   3   1 2567.74  114.29 
  -5   3   1 2639.14   97.29 
   5   3  -1 2762.12  132.59 
  -4  -3   1  639.24   51.19 
   4  -3  -1  628.84   43.80 
   4  -3  -1  623.64   45.90 
  -4  -3   1  615.74   49.60 
   4  -3  -1  539.55   39.40 
  -4  -3   1  645.84   51.99 
   4  -3  -1  628.94   49.30 
  -4  -3   1  586.64   39.70 
  -4  -3   1  625.84   48.40 
  -4  -3   1  473.25   51.39 
  -4  -3   1  570.84   50.19 
  -4  -3   1  645.74   55.19 
   4  -3  -1  590.54   45.40 
  -4  -3   1  537.35   54.39 
  -4  -3   1  614.84   67.69 
   4  -3  -1  715.83   49.00 
   4  -3  -1  537.45   44.20 
   4  -3  -1  552.94   42.90 
  -4  -3   1  562.44   42.30 
   4  -3  -1  637.44   46.70 
   4  -3  -1  596.74   40.30 
   4  -3  -1  591.74   42.10 
   4  -3  -1  506.25   43.70 
   4  -3  -1  690.23   43.60 
   4   3  -1  588.04   46.40 
   4   3  -1  629.34   50.79 
  -4   3   1  576.24   38.10 
   4   3  -1  591.04   35.70 
  -4   3   1  569.64   44.70 
  -4   3   1  571.84   38.50 
  -4   3   1  589.04   45.00 
  -4   3   1  555.84   45.80 
   4   3  -1  594.44   40.00 
  -4   3   1  608.44   29.30 
   4   3  -1  474.75   53.89 
  -4   3   1  657.43   46.00 
  -4   3   1  569.14   41.90 
   4   3  -1  643.14   49.60 
  -4   3   1  582.74   27.10 
  -4   3   1  618.84   27.00 
   4   3  -1  496.35   43.40 
  -4   3   1  580.04   41.90 
   4   3  -1  694.73   54.59 
   4   3  -1  584.04   49.70 
  -4   3   1  592.14   33.40 
   4   3  -1  584.34   43.30 
  -4   3   1  605.54   37.70 
  -4   3   1  621.94   43.10 
   4   3  -1  728.83   46.80 
  -4   3   1  585.24   30.70 
   4   3  -1  502.75   53.89 
   4   3  -1  590.04   45.50 
   4   3  -1  640.64   49.00 
   4   3  -1  581.74   38.10 
   4   3  -1  493.85   51.89 
   4   3  -1  610.94   45.90 
   3  -3  -1 3648.73  133.59 
   3  -3  -1 3556.34  132.49 
  -3  -3   1 3549.04  131.29 
  -3  -3   1 3385.06  148.89 
  -3  -3   1 3561.74  142.19 
  -3  -3   1 3527.95  129.69 
  -3  -3   1 3906.51  149.29 
  -3  -3   1 3705.13  145.89 
   3  -3  -1 3681.03  131.09 
   3  -3  -1 3547.25  134.89 
   3  -3  -1 3744.73  134.99 
  -3  -3   1 3740.23  142.49 
  -3  -3   1 3666.03  134.69 
  -3  -3   1 3697.03  143.69 
   3  -3  -1 3602.64  141.19 
  -3  -3   1 3732.83  147.69 
  -3  -3   1 3691.73  128.99 
  -3  -3   1 3828.82  116.09 
   3  -3  -1 3633.94  136.29 
   3  -3  -1 3683.43  135.29 
  -3  -3   1 3513.05  140.49 
   3  -3  -1 3607.14  131.49 
   3  -3  -1 3620.84  135.29 
   3  -3  -1 3456.15  131.69 
   3  -3  -1 3627.94  136.19 
  -3   3   1 3500.85  132.29 
   3   3  -1 3480.25  120.49 
   3   3  -1 3534.65  141.09 
   3   3  -1 3658.03  142.89 
  -3   3   1 3710.33  139.59 
  -3   3   1 3571.04  113.29 
  -3   3   1 3623.14  130.49 
   3   3  -1 3683.43  129.09 
  -3   3   1 3566.14  131.49 
  -3   3   1 3573.24  131.59 
   3   3  -1 3565.54  133.79 
  -3   3   1 3429.56  134.59 
  -3   3   1 3659.53  133.59 
  -3   3   1 3473.15  136.39 
  -3   3   1 3572.64  129.19 
   3   3  -1 3424.26  135.39 
   3   3  -1 3586.54  142.99 
  -3   3   1 3530.45  128.29 
   3   3  -1 3676.73  142.79 
  -3   3   1 3438.36  131.59 
   3   3  -1 3591.14  133.99 
  -3   3   1 3636.44  135.19 
   3   3  -1 3681.43  142.39 
   3   3  -1 3529.75  119.69 
  -3   3   1 3591.24  119.09 
  -3   3   1 3527.65  129.29 
  -3   3   1 3686.53  124.59 
   3   3  -1 3741.13  147.39 
  -3   3   1 3596.24  130.39 
   3   3  -1 3636.04  130.99 
   3   3  -1 3666.63  137.59 
   3   3  -1 3717.73  144.99 
  -3   3   1 3657.33  130.09 
   3   3  -1 3589.94  145.49 
  -2  -3   1  276.47   35.00 
   2  -3  -1  285.87   29.90 
  -2  -3   1  304.67   39.40 
  -2  -3   1  267.47   31.70 
  -2  -3   1  335.37   33.60 
   2  -3  -1  268.57   30.90 
  -2  -3   1  295.37   34.30 
   2  -3  -1  316.57   39.00 
   2  -3  -1  286.17   22.10 
   2  -3  -1  342.67   39.10 
   2  -3  -1  323.97   37.90 
  -2  -3   1  368.66   41.30 
  -2  -3   1  375.06   38.70 
  -2  -3   1  326.37   21.80 
  -2  -3   1  389.86   45.80 
   2  -3  -1  273.17   23.50 
  -2  -3   1  325.47   35.50 
  -2  -3   1  266.07   30.50 
  -2  -3   1  309.37   33.70 
   2  -3  -1  308.27   34.10 
   2  -3  -1  331.37   34.40 
   2  -3  -1  292.97   23.10 
  -2  -3   1  389.36   45.60 
  -2  -3   1  291.57   34.00 
  -2  -3   1  316.77   25.60 
  -2  -3   1  304.97   22.20 
  -2  -3   1  332.77   30.20 
  -2  -3   1  320.97   21.90 
   2  -3  -1  303.27   24.60 
   2  -3  -1  338.67   36.50 
  -2  -3   1  313.67   23.90 
   2  -3  -1  331.17   36.10 
   2   3  -1  308.37   31.60 
  -2   3   1  307.57   15.80 
   2   3  -1  227.78   27.80 
  -2   3   1  303.27   24.10 
  -2   3   1  285.97   23.50 
  -2   3   1  315.07   31.00 
  -2   3   1  295.47   23.60 
   2   3  -1  330.37   37.80 
  -2   3   1  327.27   22.50 
   2   3  -1  304.87   23.00 
  -2   3   1  345.37   35.70 
  -2   3   1  348.57   38.00 
  -2   3   1  300.57   42.70 
  -2   3   1  331.17   24.70 
  -2   3   1  369.96   23.60 
  -2   3   1  289.07   24.00 
   2   3  -1  342.37   36.60 
  -2   3   1  328.57   33.70 
  -2   3   1  333.77   39.90 
   2   3  -1  345.07   37.00 
  -2   3   1  352.66   23.50 
   2   3  -1  309.77   34.90 
   2   3  -1  256.57   32.80 
   2   3  -1  289.27   32.40 
   2   3  -1  246.08   29.40 
   2   3  -1  395.86   42.00 
  -2   3   1  314.67   24.20 
  -2   3   1  303.17   21.90 
   2   3  -1  276.27   30.10 
  -2   3   1  341.57   37.90 
   2   3  -1  342.57   37.70 
  -2   3   1  300.07   21.10 
   2   3  -1  318.97   22.90 
  -2   3   1  333.57   28.90 
   2   3  -1  321.57   35.40 
  -2   3   1  294.07   30.30 
  -2   3   1  295.57   24.80 
  -2   3   1  302.37   31.10 
  -2   3   1  346.77   39.30 
  -2   3   1  270.37   30.00 
  -2   3   1  315.07   24.30 
   2   3  -1  371.96   28.50 
   2   3  -1  320.37   23.70 
   2   3  -1  310.07   22.50 
  -2   3   1  315.27   36.10 
   2   3  -1  231.88   30.60 
  -2   3   1  290.17   29.70 
  -2   3   1  276.67   31.30 
  -2   3   1  330.17   27.60 
   2   3  -1  293.37   23.20 
   2   3  -1  243.08   32.90 
  -1  -3   1 3949.41  138.09 
   1  -3  -1 3675.23  124.99 
   1  -3  -1 3850.91  133.69 
   1  -3  -1 3864.71  116.09 
  -1  -3   1 3862.81  137.49 
   1  -3  -1 3792.82  132.39 
   1  -3  -1 3696.03  143.19 
  -1  -3   1 3784.32  132.09 
   1  -3  -1 3656.43  146.19 
   1  -3  -1 3713.63  131.39 
  -1  -3   1 3735.53  136.09 
   1  -3  -1 3730.03  115.79 
  -1  -3   1 3772.02  138.99 
   1  -3  -1 3920.21  139.99 
   1  -3  -1 3826.22  132.19 
   1  -3  -1 3718.83  123.69 
   1  -3  -1 3755.92  131.19 
   1  -3  -1 3801.12  138.79 
   1  -3  -1 3813.82  146.89 
   1  -3  -1 3896.31  118.79 
  -1  -3   1 3794.42  129.59 
  -1  -3   1 3883.71  132.59 
  -1  -3   1 3773.72  115.29 
   1  -3  -1 3626.44  126.69 
  -1  -3   1 3918.91  146.19 
  -1  -3   1 3698.73  138.99 
  -1  -3   1 3841.52  118.89 
  -1  -3   1 3881.71  141.79 
  -1  -3   1 3883.61  139.49 
  -1  -3   1 3753.42  136.19 
  -1  -3   1 3674.13  128.29 
   1  -3  -1 3567.94  135.69 
  -1  -3   1 3698.73  135.89 
  -1  -3   1 3842.42  133.39 
   1  -3  -1 3516.15  134.29 
  -1  -3   1 3875.91  134.69 
  -1  -3   1 3954.50  148.99 
  -1  -3   1 3797.32  134.79 
   1  -3  -1 3728.53  123.09 
  -1   3   1 3672.93  130.59 
   1   3  -1 3720.93  131.59 
   1   3  -1 3840.92  135.29 
  -1   3   1 3806.22  117.79 
   1   3  -1 3700.53  116.39 
   1   3  -1 3579.84  123.89 
  -1   3   1 3690.13  129.99 
   1   3  -1 3815.42  130.89 
  -1   3   1 3783.32  126.89 
   1   3  -1 3770.12  121.99 
   1   3  -1 3780.12  139.89 
  -1   3   1 3812.62  118.69 
  -1   3   1 3863.81  119.39 
  -1   3   1 3789.12  135.39 
   1   3  -1 4079.29  130.09 
   1   3  -1 3773.32  138.79 
   1   3  -1 3676.83  136.89 
  -1   3   1 3786.02  119.59 
   1   3  -1 3900.91  135.69 
   1   3  -1 3780.42  117.39 
  -1   3   1 3904.21  136.49 
  -1   3   1 3668.23  164.48 
   1   3  -1 3791.12  139.19 
   1   3  -1 3709.53  139.19 
   1   3  -1 3913.51  137.19 
  -1   3   1 3677.63  118.69 
   1   3  -1 3757.02  136.99 
  -1   3   1 3720.83  125.59 
  -1   3   1 3592.94  133.69 
   1   3  -1 3872.31  135.89 
  -1   3   1 3744.73  116.49 
  -1   3   1 3744.93  116.09 
  -1   3   1 3717.73  126.29 
   1   3  -1 3442.16  137.09 
  -1   3   1 3637.04  127.69 
   1   3  -1 3912.81  127.39 
  -1   3   1 3835.62  134.59 
  -1   3   1 3763.92  127.89 
   1   3  -1 3680.13  130.99 
  -1   3   1 3782.52  127.69 
   1   3  -1 3808.52  132.99 
  -1   3   1 3709.63  149.39 
   1   3  -1 3800.32  129.89 
  -1   3   1 3789.12  119.09 
   1   3  -1 3649.63  133.89 
   1   3  -1 3749.72  134.29 
  -1   3   1 3850.31  136.49 
  -1   3   1 3725.73  137.99 
  -1   3   1 3625.74  154.78 
  -1   3   1 3384.86  149.88 
   0  -3   1  204.98   24.40 
   0  -3  -1  285.97   21.00 
   0  -3   1  252.07   18.90 
   0  -3   1  243.68   18.90 
   0  -3  -1  233.18   36.40 
   0  -3   1  251.87   29.40 
   0  -3   1  227.38   28.70 
   0  -3  -1  231.58   43.10 
   0  -3   1  294.27   32.60 
   0  -3   1  217.98   39.50 
   0  -3  -1  237.88   25.20 
   0  -3   1  299.47   33.80 
   0  -3   1  303.57   31.00 
   0  -3  -1  220.58   24.00 
   0  -3  -1  234.98   30.30 
   0  -3   1  176.78   31.60 
   0  -3  -1  238.18   18.90 
   0  -3   1  378.16   44.30 
   0  -3  -1  284.27   29.00 
   0  -3   1  340.47   41.00 
   0  -3  -1  212.38   23.00 
   0  -3   1  250.77   14.10 
   0  -3  -1  281.87   28.80 
   0  -3  -1  288.77   29.50 
   0  -3   1  227.38   25.80 
   0  -3  -1  239.68   27.60 
   0  -3  -1  249.48   25.80 
   0  -3  -1  251.57   30.20 
   0  -3   1  228.68   28.40 
   0  -3  -1  257.77   28.90 
   0  -3   1  239.88   28.20 
   0  -3   1  305.07   39.80 
   0  -3   1  270.77   34.90 
   0  -3   1  247.28   28.50 
   0  -3   1  165.58   33.70 
   0  -3  -1  194.98   37.30 
   0  -3   1  278.57   27.50 
   0  -3  -1  146.79   36.40 
   0   3   1  244.38   24.90 
   0   3  -1  179.08   21.10 
   0   3  -1  215.38   26.60 
   0   3  -1  261.47   19.80 
   0   3  -1  302.97   30.50 
   0   3  -1  261.37   16.00 
   0   3  -1  242.88   25.60 
   0   3  -1  240.18   27.40 
   0   3  -1  271.27   30.00 
   0   3   1  245.68   37.00 
   0   3  -1  269.97   26.40 
   0   3  -1  220.78   26.10 
   0   3  -1  294.67   29.70 
   0   3  -1  316.77   35.00 
   0   3  -1  271.67   19.20 
   0   3   1  286.47   21.40 
   0   3   1  230.08   24.30 
   0   3   1  260.77   36.90 
   0   3   1  239.18   18.50 
   0   3   1  273.27   18.50 
   0   3   1  210.98   24.40 
   0   3   1  220.38   26.00 
   0   3   1  220.58   13.90 
   0   3   1  268.97   30.30 
   0   3   1  166.68   24.50 
   0   3   1  233.68   18.70 
   0   3  -1  201.88   25.90 
   0   3  -1  242.88   26.70 
   0   3   1  215.68   28.30 
   0   3  -1  256.37   30.70 
   0   3   1  178.48   21.70 
   0   3  -1  232.18   18.10 
   0   3   1  252.17   33.00 
   0   3   1  284.87   19.50 
   0   3   1  210.98   21.70 
   0   3   1  238.78   26.80 
   0   3   1  246.48   29.20 
   0   3   1  238.28   19.60 
   0   3  -1  238.18   27.90 
   0   3  -1  241.38   23.60 
   0   3  -1  237.78   27.80 
   0   3   1  267.57   32.10 
  -1  -3  -1 6104.89  197.18 
   1  -3   1 5999.50  211.48 
   1  -3   1 5776.72  219.98 
  -1  -3  -1 6041.20  197.18 
   1  -3   1 5708.33  219.98 
  -1  -3  -1 6000.50  181.18 
  -1  -3  -1 6203.28  203.78 
  -1  -3  -1 6023.90  204.08 
   1  -3   1 6147.38  190.58 
  -1  -3  -1 6087.29  211.38 
  -1  -3  -1 5953.50  199.58 
   1  -3   1 5847.02  202.78 
  -1  -3  -1 5967.40  201.18 
   1  -3   1 5979.60  189.28 
   1  -3   1 5945.60  196.98 
  -1  -3  -1 6117.09  214.78 
  -1  -3  -1 5957.60  207.58 
   1  -3   1 6064.49  178.88 
  -1  -3  -1 5947.40  179.38 
   1  -3   1 5957.80  191.18 
   1  -3   1 5520.15  197.38 
  -1  -3  -1 6184.38  194.98 
   1  -3   1 5865.51  204.88 
  -1  -3  -1 6044.90  194.38 
  -1  -3  -1 5858.01  199.08 
   1  -3   1 6029.30  178.88 
   1  -3   1 6260.07  193.08 
   1  -3   1 6346.56  198.88 
  -1  -3  -1 6092.09  182.08 
   1  -3   1 5908.91  188.58 
  -1  -3  -1 6019.50  203.68 
  -1  -3  -1 6107.99  220.58 
  -1  -3  -1 6241.78  200.58 
  -1  -3  -1 5980.80  186.88 
  -1  -3  -1 6012.90  193.48 
   1  -3   1 5928.81  193.68 
  -1  -3  -1 6037.60  195.88 
   1  -3   1 5896.41  203.08 
  -1   3  -1 5882.81  178.88 
   1   3   1 5842.92  202.88 
   1   3   1 6162.08  196.98 
  -1   3  -1 5576.24  201.38 
  -1   3  -1 6033.40  190.98 
  -1   3  -1 6026.40  194.28 
   1   3   1 6238.28  206.48 
  -1   3  -1 6006.80  203.28 
  -1   3  -1 6099.19  197.38 
   1   3   1 6019.40  192.58 
  -1   3  -1 6108.49  182.58 
  -1   3  -1 5949.90  207.68 
  -1   3  -1 5816.42  193.38 
  -1   3  -1 6038.60  206.58 
   1   3   1 5967.30  190.78 
  -1   3  -1 5861.51  219.88 
   1   3   1 6189.18  201.88 
  -1   3  -1 5832.92  198.78 
  -1   3  -1 6052.19  187.98 
  -1   3  -1 5941.91  201.28 
   1   3   1 5942.41  202.38 
  -1   3  -1 5972.40  180.58 
   1   3   1 6195.08  200.28 
   1   3   1 6057.69  195.08 
  -1   3  -1 6012.10  199.28 
  -1   3  -1 5976.80  206.38 
   1   3   1 5872.21  203.58 
  -1   3  -1 6209.88  202.68 
   1   3   1 5888.51  198.98 
   1   3   1 5852.11  205.88 
   1   3   1 6056.59  201.08 
   1   3   1 6045.90  188.38 
   1   3   1 5834.52  190.08 
   1   3   1 5998.60  212.98 
  -1   3  -1 6112.49  199.38 
   1   3   1 5977.30  198.08 
   1   3   1 6237.08  198.58 
  -1   3  -1 5772.22  216.08 
  -1   3  -1 6025.00  198.08 
  -1   3  -1 5274.17  196.98 
   1   3   1 5801.32  200.68 
   1   3   1 6121.39  185.48 
   1   3   1 5812.82  200.98 
  -1   3  -1 5958.20  194.18 
   1   3   1 6010.60  196.18 
  -2  -3  -1  813.82   42.80 
  -2  -3  -1  860.71   52.79 
  -2  -3  -1  830.92   47.40 
   2  -3   1  761.12   54.69 
  -2  -3  -1  710.53   44.40 
  -2  -3  -1  823.32   42.00 
   2  -3   1  585.94   48.10 
  -2  -3  -1  767.42   51.29 
   2  -3   1  754.02   38.90 
   2  -3   1  807.62   44.20 
  -2  -3  -1  790.52   45.30 
  -2  -3  -1  737.33   54.09 
  -2  -3  -1  724.83   44.10 
  -2  -3  -1  739.23   47.10 
  -2  -3  -1  708.13   37.60 
   2  -3   1  852.41   51.09 
  -2  -3  -1  772.72   50.09 
   2  -3   1  677.13   43.90 
  -2  -3  -1  776.82   48.50 
   2  -3   1  785.62   44.10 
  -2  -3  -1  757.32   38.30 
  -2  -3  -1  882.51   60.09 
   2  -3   1  768.72   39.00 
   2  -3   1  812.42   45.90 
  -2  -3  -1  766.82   51.99 
  -2  -3  -1  678.13   43.90 
   2  -3   1  751.72   48.50 
   2  -3   1  742.33   46.20 
  -2  -3  -1  840.12   48.80 
   2  -3   1  750.42   49.20 
  -2   3  -1  761.42   46.20 
  -2   3  -1  781.12   37.80 
  -2   3  -1  768.12   38.80 
   2   3   1  815.62   47.70 
   2   3   1  748.83   51.49 
   2   3   1  799.52   46.70 
   2   3   1  813.92   49.99 
  -2   3  -1  816.72   44.50 
  -2   3  -1  730.53   48.60 
   2   3   1  765.12   42.50 
   2   3   1  819.22   49.60 
   2   3   1  788.02   49.70 
   2   3   1  739.13   41.00 
  -2   3  -1  775.02   37.30 
   2   3   1  791.32   36.00 
   2   3   1  783.82   49.20 
   2   3   1  776.52   47.90 
   2   3   1  725.03   49.80 
   2   3   1  668.43   45.30 
  -2   3  -1  752.62   38.50 
  -2   3  -1  927.31   60.09 
  -2   3  -1  824.62   42.80 
  -2   3  -1  789.92   46.60 
   2   3   1  740.43   51.09 
   2   3   1  758.42   44.80 
   2   3   1  839.22   57.39 
  -2   3  -1  758.52   46.00 
   2   3   1  675.43   47.90 
  -2   3  -1  746.23   38.40 
  -2   3  -1  789.22   38.40 
  -2   3  -1  775.32   34.60 
  -2   3  -1  772.32   47.90 
  -2   3  -1  744.23   40.20 
  -2   3  -1  747.93   42.10 
  -2   3  -1  806.02   52.79 
  -2   3  -1  729.63   46.00 
  -2   3  -1  816.82   39.60 
  -2   3  -1  770.22   43.10 
  -2   3  -1  772.92   56.09 
   2   3   1  739.83   45.30 
  -2   3  -1  740.83   47.90 
   3  -3   1 2827.02  114.39 
  -3  -3  -1 2951.20  113.09 
  -3  -3  -1 2767.02  120.49 
   3  -3   1 2792.22  122.19 
   3  -3   1 2726.53  109.19 
   3  -3   1 2772.92  106.19 
   3  -3   1 2919.01  114.19 
  -3  -3  -1 2997.30  130.69 
   3  -3   1 2874.61  117.29 
  -3  -3  -1 2728.83  106.29 
  -3  -3  -1 2756.32  116.19 
  -3  -3  -1 2818.32  120.09 
  -3  -3  -1 2918.61  122.89 
  -3  -3  -1 2552.64  126.49 
   3  -3   1 2783.52  100.39 
   3  -3   1 2743.73  118.99 
  -3  -3  -1 2848.62  107.19 
  -3  -3  -1 2836.22  119.39 
   3  -3   1 2743.23  110.79 
  -3  -3  -1 2873.11  120.09 
  -3  -3  -1 2840.42  125.79 
  -3  -3  -1 2756.62  121.79 
  -3  -3  -1 2810.02  108.49 
  -3   3  -1 2836.22  109.59 
  -3   3  -1 2746.33  110.59 
  -3   3  -1 2785.22   93.49 
   3   3   1 2738.23  119.89 
  -3   3  -1 2861.51  117.99 
  -3   3  -1 2803.92  117.59 
  -3   3  -1 2838.22   96.89 
  -3   3  -1 2927.81  108.19 
   3   3   1 2978.80  109.59 
  -3   3  -1 2871.41  119.99 
  -3   3  -1 2838.82  104.09 
   3   3   1 2836.82  117.09 
   3   3   1 2727.93  118.39 
   3   3   1 2697.73  112.29 
   3   3   1 2871.81  109.69 
   3   3   1 2939.91  111.29 
  -3   3  -1 2845.22   92.89 
   3   3   1 2863.21  117.19 
  -3   3  -1 2779.52  102.19 
  -3   3  -1 2917.81  109.79 
   3   3   1 2737.23  123.49 
  -3   3  -1 2678.03  122.99 
   3   3   1 2708.53  120.69 
   3   3   1 2739.43  117.89 
  -3   3  -1 2797.82  109.69 
  -3   3  -1 2742.23  103.19 
   3   3   1 2814.22  118.59 
   3   3   1 2675.63  117.59 
  -3   3  -1 2979.80  112.59 
  -3   3  -1 2868.41   98.69 
  -3   3  -1 2842.92   98.99 
   3   3   1 2742.93  111.79 
   4  -3   1  400.66   27.20 
  -4  -3  -1  425.66   33.10 
   4  -3   1  359.86   38.00 
   4  -3   1  356.46   19.90 
  -4  -3  -1  253.37   37.30 
  -4  -3  -1  440.36   49.60 
   4  -3   1  363.16   40.90 
   4  -3   1  383.66   40.60 
  -4  -3  -1  362.86   44.40 
   4  -3   1  398.06   48.60 
  -4  -3  -1  369.06   47.90 
   4  -3   1  394.06   32.40 
  -4  -3  -1  383.16   52.49 
  -4  -3  -1  317.17   35.20 
   4  -3   1  425.96   48.70 
   4  -3   1  368.46   48.40 
  -4  -3  -1  323.17   46.20 
  -4  -3  -1  337.77   41.50 
   4  -3   1  323.17   43.40 
   4  -3   1  315.47   37.20 
  -4  -3  -1  354.36   43.70 
   4  -3   1  357.46   39.90 
  -4  -3  -1  297.97   40.00 
  -4  -3  -1  376.76   53.09 
   4   3   1  373.76   44.90 
   4   3   1  370.46   45.60 
  -4   3  -1  314.87   40.60 
  -4   3  -1  379.76   23.00 
   4   3   1  370.16   43.80 
  -4   3  -1  351.16   19.90 
  -4   3  -1  322.97   25.40 
  -4   3  -1  302.47   32.50 
  -4   3  -1  349.77   28.70 
  -4   3  -1  333.17   33.30 
  -4   3  -1  378.46   22.20 
   4   3   1  301.47   45.00 
   4   3   1  366.76   45.90 
  -4   3  -1  348.97   43.50 
   4   3   1  291.17   38.70 
   4   3   1  285.17   39.90 
   4   3   1  326.97   40.00 
   4   3   1  448.36   52.39 
   4   3   1  327.67   38.80 
   4   3   1  390.96   30.20 
  -4   3  -1  325.97   36.10 
  -4   3  -1  376.46   47.20 
   4   3   1  335.97   42.60 
   4   3   1  385.66   31.10 
   4   3   1  428.06   49.99 
  -4   3  -1  300.87   41.20 
  -4   3  -1  350.26   22.20 
   4   3   1  307.67   37.70 
  -4   3  -1  441.26   53.59 
  -4   3  -1  350.46   20.30 
  -4   3  -1  360.86   22.20 
  -4   3  -1  343.37   29.10 
  -4   3  -1  409.96   40.50 
  -4   3  -1  368.56   38.90 
   5  -3   1  422.46   46.70 
   5  -3   1  415.46   51.29 
  -5  -3  -1  534.45   58.59 
   5  -3   1  397.76   26.50 
   5  -3   1  485.25   58.99 
   5  -3   1  453.85   49.90 
  -5  -3  -1  555.84   59.59 
   5  -3   1  382.76   46.40 
   5  -3   1  422.16   43.70 
   5  -3   1  444.86   34.80 
   5  -3   1  435.76   49.40 
   5  -3   1  397.26   49.40 
  -5  -3  -1  488.25   59.39 
  -5  -3  -1  513.95   68.39 
  -5  -3  -1  373.96   51.19 
  -5  -3  -1  439.26   51.89 
   5  -3   1  377.06   54.59 
  -5  -3  -1  597.54   65.29 
  -5  -3  -1  403.86   49.10 
  -5  -3  -1  309.77   49.99 
  -5  -3  -1  551.74   53.19 
   5  -3   1  350.06   46.30 
  -5  -3  -1  517.85   69.59 
   5   3   1  401.96   29.60 
   5   3   1  390.66   53.29 
  -5   3  -1  438.76   26.40 
  -5   3  -1  472.05   30.60 
  -5   3  -1  461.25   36.60 
  -5   3  -1  464.85   33.50 
  -5   3  -1  460.25   36.90 
  -5   3  -1  478.75   50.09 
  -5   3  -1  448.46   53.99 
   5   3   1  462.85   34.50 
  -5   3  -1  448.06   36.10 
   5   3   1  401.96   49.10 
  -5   3  -1  445.76   59.79 
   5   3   1  473.75   60.69 
   5   3   1  472.95   56.99 
   5   3   1  587.34   65.49 
  -5   3  -1  493.55   34.70 
  -5   3  -1  472.65   33.40 
  -5   3  -1  527.35   61.69 
  -5   3  -1  447.66   56.69 
   5   3   1  428.26   30.70 
  -5   3  -1  468.75   53.49 
  -5   3  -1  445.06   22.80 
  -5   3  -1  383.06   47.80 
   5   3   1  454.35   38.00 
   5   3   1  463.45   33.20 
  -5   3  -1  427.16   51.99 
   5   3   1  479.45   57.39 
   5   3   1  424.26   47.70 
  -5   3  -1  445.56   25.30 
   5   3   1  463.65   56.09 
   5   3   1  454.85   29.60 
  -5   3  -1  472.15   22.80 
   5   3   1  389.46   48.90 
   5   3   1  368.46   46.40 
   5   3   1  455.25   49.40 
   5   3   1  495.85   58.69 
   5   3   1  380.66   51.19 
  -5   3  -1  451.55   45.30 
  -5   3  -1  474.95   21.90 
   6  -3   1  119.89   34.40 
  -6  -3  -1   85.59   26.40 
  -6  -3  -1  123.99   31.70 
  -6  -3  -1  101.99   27.40 
  -6  -3  -1  133.09   30.30 
  -6  -3  -1   97.49   28.90 
   6  -3   1   89.29   28.00 
   6  -3   1  128.49   32.30 
   6  -3   1   96.19   30.50 
  -6  -3  -1   98.59   33.10 
  -6  -3  -1  137.29   32.70 
   6  -3   1  105.89   32.60 
   6  -3   1  140.89   28.30 
   6  -3   1  139.39   32.30 
   6  -3   1   89.29   26.40 
  -6  -3  -1  130.49   40.00 
  -6  -3  -1  110.39   29.30 
  -6  -3  -1  121.69   35.20 
   6  -3   1   67.99   24.30 
  -6  -3  -1   92.09   28.30 
   6  -3   1  163.48   41.50 
   6  -3   1  175.88   39.90 
  -6   3  -1   71.19   25.10 
  -6   3  -1  172.58   38.60 
   6   3   1  133.49   34.80 
  -6   3  -1   93.59   29.10 
  -6   3  -1   82.29   25.20 
   6   3   1   72.49   28.50 
   6   3   1  142.99   20.80 
   6   3   1  133.69   25.10 
   6   3   1  143.09   35.50 
  -6   3  -1  114.19   16.10 
   6   3   1  158.48   17.70 
  -6   3  -1  154.28   25.10 
  -6   3  -1  151.58   27.70 
  -6   3  -1  134.09   36.00 
  -6   3  -1  112.19   22.10 
   6   3   1  116.49   32.40 
  -6   3  -1   93.99   17.80 
   6   3   1  106.19   28.40 
   6   3   1  141.59   31.40 
   6   3   1  190.88   43.50 
   6   3   1   79.79   27.40 
  -6   3  -1  167.28   38.40 
   6   3   1   76.19   25.70 
   6   3   1  120.69   30.90 
   6   3   1   91.99   28.50 
  -6   3  -1  101.69   26.00 
  -6   3  -1  145.19   32.50 
   6   3   1  141.69   28.40 
  -6   3  -1  106.69   30.50 
  -6   3  -1  116.79   19.10 
   6   3   1   63.79   24.50 
   7  -3   1   13.20   19.00 
   7  -3   1   24.60   20.40 
  -7  -3  -1   -8.70   12.60 
  -7  -3  -1   21.00   16.80 
  -7  -3  -1   24.00   25.50 
  -7  -3  -1   -2.00   14.00 
   7  -3   1   14.80   18.70 
  -7  -3  -1    2.50   14.10 
  -7  -3  -1   46.00   23.70 
  -7  -3  -1   11.00   15.60 
   7  -3   1   19.00   19.20 
  -7  -3  -1  -17.90   16.10 
   7  -3   1   36.80   25.00 
  -7  -3  -1   19.70   19.30 
  -7  -3  -1   -4.00   13.20 
  -7  -3  -1   36.30   22.80 
   7  -3   1   -3.90   15.10 
   7  -3   1   34.40   17.40 
   7  -3   1   19.90   18.50 
   7  -3   1    0.50   19.30 
   7  -3   1   16.80   21.60 
  -7   3  -1   -7.90   10.90 
  -7   3  -1   13.30   17.60 
   7   3   1  -17.60   13.30 
  -7   3  -1   12.10   17.70 
   7   3   1    2.40   15.60 
   7   3   1   17.20   18.30 
   7   3   1   24.50   17.40 
  -7   3  -1   19.20   20.50 
  -7   3  -1   29.00   22.30 
  -7   3  -1    2.40   13.20 
   7   3   1   27.50   21.30 
  -7   3  -1    7.60   11.70 
  -7   3  -1    8.00   13.90 
   7   3   1   16.60   23.60 
  -7   3  -1   -9.50   11.10 
  -7   3  -1    5.20   13.70 
   7   3   1    5.60   14.70 
   7   3   1    2.70   13.10 
  -7   3  -1   14.30   14.60 
   7   3   1    9.80   17.50 
   7   3   1    8.30   16.20 
  -7   3  -1    0.90   14.80 
  -7   3  -1    6.60   11.80 
   7   3   1    3.50   16.70 
   7   3   1   12.30   13.10 
   7   3   1   15.00   17.50 
  -7   3  -1   -8.80   14.80 
  -7   3  -1   13.00   22.70 
  -8  -3  -1   13.70   16.20 
   8  -3   1    1.60   19.30 
  -8  -3  -1   19.60   20.40 
   8  -3   1   28.20   27.20 
  -8  -3  -1   23.80   19.80 
  -8  -3  -1   13.40   20.30 
  -8  -3  -1   10.20   25.40 
   8  -3   1    8.60   17.80 
   8  -3   1   33.90   22.90 
  -8  -3  -1   14.50   19.10 
  -8  -3  -1   20.70   22.80 
  -8  -3  -1   12.50   20.30 
  -8  -3  -1   28.00   24.40 
   8  -3   1  -11.70   17.20 
   8  -3   1  -19.40   15.90 
  -8  -3  -1    2.80   19.10 
   8  -3   1   17.60   20.80 
  -8  -3  -1   19.10   22.90 
   8  -3   1    6.50   21.40 
   8   3   1   40.00   24.30 
   8   3   1   12.30   18.70 
  -8   3  -1   11.30   20.10 
  -8   3  -1   17.90   17.40 
  -8   3  -1   17.70   19.60 
  -8   3  -1    9.80   17.10 
  -8   3  -1   33.50   21.20 
   8   3   1   -3.90   15.70 
  -8   3  -1   -6.80   13.50 
  -8   3  -1    3.50   15.80 
  -8   3  -1   -2.40   18.00 
   8   3   1   15.70   19.30 
   8   3   1   25.70   26.70 
  -8   3  -1   12.70   20.20 
  -8   3  -1   18.70   20.20 
   8   3   1   58.99   27.60 
  -8   3  -1  -12.90   20.40 
   8   3   1   95.29   34.70 
  -8   3  -1   43.50   27.80 
   8   3   1    3.50   15.00 
   8   3   1   28.80   23.70 
   8   3   1    5.60   17.30 
   8   3   1    6.40   16.20 
  -8   3  -1    7.60   22.80 
  -8   3  -1    0.50   13.50 
  -9  -3  -1   49.99   30.80 
  -9  -3  -1   83.59   32.50 
  -9  -3  -1   80.69   31.70 
  -9  -3  -1   25.50   27.30 
  -9  -3  -1   19.10   24.40 
  -9  -3  -1    8.90   31.70 
   9  -3   1  138.19   41.90 
  -9  -3  -1   59.09   36.80 
  -9  -3  -1   72.89   33.40 
   9  -3   1   59.09   33.60 
  -9  -3  -1   90.49   41.00 
  -9  -3  -1   98.09   39.20 
   9  -3   1   56.69   31.20 
  -9  -3  -1   43.70   30.70 
  -9   3  -1  128.89   47.80 
   9   3   1  183.08   51.79 
  -9   3  -1  100.09   40.30 
  -9   3  -1   58.39   30.80 
  -9   3  -1   56.89   27.20 
   9   3   1   47.40   28.60 
  -9   3  -1   40.10   28.60 
  -9   3  -1   33.90   28.10 
  -9   3  -1   86.59   41.90 
   9   3   1   93.59   39.30 
  -9   3  -1  109.19   43.70 
  -9   3  -1   82.59   34.70 
   9   3   1   46.10   28.90 
   9   3   1  128.69   41.40 
  -9   3  -1  108.89   44.30 
   9   3   1   70.89   34.70 
   9   3   1   79.89   38.20 
   9   3   1   88.39   40.40 
   9   3   1   86.69   41.60 
  -9   3  -1  121.19   43.70 
   9   3   1   64.49   35.90 
  -9  -4   1   29.00   24.10 
  -9  -4   1   42.00   36.80 
  -9  -4   1   31.40   24.20 
  -9  -4   1   54.79   35.00 
  -9  -4   1   29.50   25.70 
  -9  -4   1   45.60   33.30 
  -9  -4   1   39.70   26.40 
  -9  -4   1   62.49   35.00 
  -9  -4   1   41.40   25.70 
  -9  -4   1   61.19   29.70 
  -9  -4   1   30.40   26.60 
  -9   4   1   38.30   28.80 
  -9   4   1   38.30   34.30 
  -9   4   1   55.79   32.60 
   9   4  -1   28.10   27.00 
   9   4  -1   31.90   22.00 
   9   4  -1   77.19   38.20 
  -9   4   1   13.40   27.30 
  -9   4   1   48.70   32.00 
   9   4  -1   40.30   28.00 
  -9   4   1   35.80   27.60 
   9   4  -1   47.30   29.90 
   9   4  -1   90.69   37.60 
  -9   4   1   10.00   26.80 
  -9   4   1   45.20   29.30 
  -9   4   1   26.00   22.30 
  -9   4   1   55.99   29.60 
   9   4  -1    6.30   22.40 
  -9   4   1   40.40   34.30 
   9   4  -1   64.79   30.00 
  -9   4   1   43.00   32.90 
   9   4  -1  111.99   41.20 
   9   4  -1   38.60   26.20 
  -8  -4   1  836.62   88.29 
  -8  -4   1 1023.10   87.19 
  -8  -4   1 1073.69  106.59 
  -8  -4   1  901.81  103.99 
  -8  -4   1  838.02  109.99 
  -8  -4   1  761.72   95.39 
  -8  -4   1  844.12   86.59 
  -8  -4   1  806.22  111.19 
  -8  -4   1  854.91  107.99 
  -8  -4   1 1010.20  107.39 
  -8  -4   1  893.81   93.39 
   8  -4  -1  952.20   95.89 
   8   4  -1  824.92   97.39 
   8   4  -1  855.81  102.49 
   8   4  -1  848.02   98.29 
  -8   4   1  856.01   85.59 
   8   4  -1  859.91  101.59 
  -8   4   1  958.60   99.89 
  -8   4   1  958.50  104.49 
  -8   4   1  972.80   99.09 
  -8   4   1 1174.98  122.39 
  -8   4   1 1046.90  116.39 
   8   4  -1 1039.50  103.69 
   8   4  -1  868.41   97.89 
  -8   4   1  882.41  103.99 
   8   4  -1 1009.00  114.09 
  -8   4   1  818.22   97.49 
   8   4  -1  853.41   97.19 
  -8   4   1 1042.00   82.39 
   8   4  -1 1058.49  121.19 
   8   4  -1  971.90  102.59 
  -8   4   1  813.32   94.89 
  -8   4   1  892.81   95.29 
  -8   4   1 1155.08   89.79 
   8   4  -1  855.81   96.29 
  -7  -4   1   52.59   25.10 
  -7  -4   1   41.10   20.80 
  -7  -4   1   58.69   30.70 
  -7  -4   1    4.70   15.10 
   7  -4  -1   45.20   23.10 
  -7  -4   1   16.90   23.20 
  -7  -4   1   76.99   30.80 
  -7  -4   1   40.80   27.80 
  -7  -4   1   46.20   20.40 
  -7  -4   1   36.70   21.40 
  -7  -4   1   59.09   27.20 
  -7  -4   1   43.70   24.10 
   7  -4  -1   55.69   24.50 
  -7   4   1   84.39   30.60 
   7   4  -1   47.10   26.20 
  -7   4   1   56.09   24.40 
   7   4  -1   30.90   24.00 
  -7   4   1   18.00   21.50 
   7   4  -1   23.50   17.70 
   7   4  -1   71.49   26.80 
   7   4  -1   60.59   26.70 
  -7   4   1   27.00   18.20 
   7   4  -1   65.69   31.20 
  -7   4   1   37.90   20.10 
  -7   4   1   71.89   31.30 
   7   4  -1   40.60   24.50 
   7   4  -1   43.90   24.70 
   7   4  -1   40.20   20.10 
  -7   4   1   18.80   17.90 
   7   4  -1   38.50   18.50 
   7   4  -1   59.89   25.70 
  -7   4   1   45.10   24.50 
   7   4  -1   24.30   21.00 
  -7   4   1   34.90   17.10 
  -7   4   1   12.80   18.50 
   7   4  -1   34.00   21.70 
   7   4  -1   14.40   20.20 
  -7   4   1   20.80   16.30 
  -7   4   1   38.80   20.70 
  -7   4   1   18.00   21.30 
  -7   4   1   49.00   26.10 
   6  -4  -1 1377.06   85.79 
   6  -4  -1 1162.08   80.79 
   6  -4  -1 1244.98   87.59 
  -6  -4   1 1196.38   85.89 
  -6  -4   1 1472.65   99.39 
  -6  -4   1 1412.36   94.99 
  -6  -4   1 1362.96   83.59 
  -6  -4   1 1225.58   94.29 
   6  -4  -1 1371.36   84.19 
  -6  -4   1 1407.06   73.99 
  -6  -4   1 1229.48  100.39 
   6  -4  -1 1385.56   88.79 
  -6  -4   1 1454.55   96.49 
  -6  -4   1 1301.57   80.99 
  -6  -4   1 1115.69   86.49 
   6  -4  -1 1429.26   79.59 
  -6  -4   1 1343.67   92.39 
   6  -4  -1 1298.87   72.19 
  -6  -4   1 1323.97  101.39 
   6   4  -1 1478.05   98.69 
   6   4  -1 1355.96   84.39 
   6   4  -1 1353.76   69.39 
  -6   4   1 1319.57   62.89 
   6   4  -1 1264.17   87.09 
  -6   4   1 1268.57   69.59 
  -6   4   1 1267.67   62.19 
   6   4  -1 1419.66   95.69 
  -6   4   1 1453.65   83.09 
   6   4  -1 1314.27   90.79 
  -6   4   1 1398.66   94.19 
  -6   4   1 1358.46   92.29 
  -6   4   1 1279.27   86.89 
  -6   4   1 1245.88   76.19 
  -6   4   1 1374.76   87.69 
   6   4  -1 1363.96   98.09 
  -6   4   1 1313.47   81.59 
   6   4  -1 1446.46   95.19 
   6   4  -1 1369.96   92.19 
  -6   4   1 1408.76   86.79 
   6   4  -1 1392.06   84.49 
   6   4  -1 1211.48   81.69 
  -6   4   1 1385.86   75.89 
  -6   4   1 1250.77   88.39 
  -6   4   1 1347.37   65.39 
   6   4  -1 1127.49   88.29 
  -6   4   1 1286.17   76.59 
   6   4  -1 1233.98   81.99 
   6   4  -1 1251.97   88.29 
  -6   4   1 1324.77   74.49 
   6   4  -1 1375.86   90.09 
   6   4  -1 1279.87   63.19 
  -6   4   1 1430.06   85.59 
  -5  -4   1  109.79   24.00 
   5  -4  -1  114.19   24.40 
   5  -4  -1   77.09   23.00 
   5  -4  -1  132.29   25.70 
  -5  -4   1   72.19   24.40 
  -5  -4   1   76.59   22.80 
  -5  -4   1  120.39   29.40 
  -5  -4   1   70.79   25.90 
  -5  -4   1   98.29   30.20 
   5  -4  -1  148.89   33.60 
  -5  -4   1  128.29   32.50 
  -5  -4   1  115.39   30.50 
   5  -4  -1  114.19   27.90 
  -5  -4   1   72.89   29.30 
   5  -4  -1  100.79   23.10 
  -5  -4   1  136.69   38.10 
   5  -4  -1  116.39   26.40 
  -5  -4   1  120.29   24.80 
  -5  -4   1  178.08   37.80 
   5  -4  -1  128.89   29.30 
   5   4  -1  102.09   28.20 
  -5   4   1  129.29   26.20 
   5   4  -1   86.69   25.60 
   5   4  -1   85.09   27.40 
  -5   4   1  117.89   31.50 
   5   4  -1  118.69   22.60 
  -5   4   1  144.19   26.60 
   5   4  -1  102.29   27.00 
  -5   4   1   88.99   28.50 
  -5   4   1  119.09   27.30 
  -5   4   1  146.39   27.00 
   5   4  -1  117.09   29.20 
   5   4  -1   91.39   20.80 
  -5   4   1  135.59   27.60 
   5   4  -1  149.19   33.40 
   5   4  -1   72.49   25.00 
   5   4  -1  140.39   31.20 
  -5   4   1  111.49   29.30 
  -5   4   1  129.69   16.30 
   5   4  -1   91.69   23.90 
  -5   4   1  118.59   27.70 
   5   4  -1  137.29   33.30 
   5   4  -1  136.09   29.90 
  -5   4   1  179.48   37.40 
   5   4  -1   91.49   25.10 
  -5   4   1   94.19   23.50 
  -5   4   1  144.19   29.10 
  -5   4   1  157.88   26.40 
   5   4  -1   78.29   27.10 
  -5   4   1  124.59   20.80 
   5   4  -1   64.29   24.60 
   4  -4  -1  752.42   51.29 
   4  -4  -1  744.73   50.09 
  -4  -4   1  736.93   59.89 
  -4  -4   1  752.82   59.29 
   4  -4  -1  903.01   58.19 
   4  -4  -1  773.22   52.49 
  -4  -4   1  792.62   59.09 
  -4  -4   1  834.22   60.69 
  -4  -4   1  795.92   53.89 
   4  -4  -1  838.12   54.49 
  -4  -4   1  869.31   66.99 
   4  -4  -1  827.62   53.99 
   4  -4  -1  705.83   52.59 
  -4  -4   1  755.02   48.90 
  -4  -4   1  744.53   66.09 
   4  -4  -1  845.62   55.69 
  -4  -4   1  712.03   59.99 
   4  -4  -1  859.91   54.59 
  -4  -4   1  817.52   52.09 
  -4  -4   1  677.83   59.09 
  -4  -4   1  719.33   59.79 
  -4   4   1  734.73   54.49 
   4   4  -1  793.02   59.99 
  -4   4   1  787.22   48.20 
   4   4  -1  757.62   38.80 
  -4   4   1  803.22   52.29 
   4   4  -1  683.03   55.99 
   4   4  -1  834.52   55.29 
   4   4  -1  733.03   58.29 
  -4   4   1  733.73   54.99 
  -4   4   1  756.22   33.20 
  -4   4   1  825.22   55.59 
  -4   4   1  772.52   40.60 
   4   4  -1  713.93   71.99 
  -4   4   1  830.12   46.80 
  -4   4   1  890.21   63.19 
   4   4  -1  735.13   55.79 
   4   4  -1  724.13   36.60 
  -4   4   1  726.93   48.60 
  -4   4   1  830.62   40.10 
   4   4  -1  816.62   48.90 
   4   4  -1  698.03   60.19 
  -4   4   1  804.22   50.39 
   4   4  -1  719.23   57.39 
   4   4  -1  818.42   61.29 
   4   4  -1  956.30   68.79 
   4   4  -1  728.63   49.99 
   4   4  -1  904.41   54.29 
   4   4  -1  826.72   57.49 
  -4   4   1  731.13   44.40 
  -4   4   1  749.33   49.50 
  -3  -4   1   26.60   15.70 
   3  -4  -1   30.10   14.30 
  -3  -4   1   17.40   12.50 
  -3  -4   1   19.10   15.00 
  -3  -4   1   18.60    9.00 
  -3  -4   1   21.70   13.20 
   3  -4  -1   29.90   12.60 
  -3  -4   1   24.40   15.90 
   3  -4  -1   47.90   16.20 
   3  -4  -1   27.40   14.40 
   3  -4  -1   46.10   17.90 
   3  -4  -1   19.90   11.70 
  -3  -4   1   27.40   14.90 
  -3  -4   1   25.10   17.20 
   3  -4  -1   56.09   19.60 
   3  -4  -1   33.00   11.20 
   3  -4  -1   36.20   15.70 
  -3  -4   1   37.60   13.00 
  -3  -4   1   18.20   11.70 
  -3  -4   1   45.10   18.80 
   3  -4  -1   34.20   13.30 
  -3  -4   1   43.00   12.20 
  -3  -4   1   29.70   15.70 
   3   4  -1   43.10   16.90 
  -3   4   1   33.10   12.50 
  -3   4   1   32.60    6.70 
   3   4  -1   45.60   15.30 
  -3   4   1   27.50   13.10 
  -3   4   1   42.00   17.20 
  -3   4   1   33.70   13.20 
   3   4  -1   50.29   13.90 
   3   4  -1   37.70   12.20 
  -3   4   1   24.50   10.40 
  -3   4   1   36.30   16.40 
   3   4  -1   14.10   13.60 
  -3   4   1   54.99   15.20 
  -3   4   1   38.70   12.90 
   3   4  -1   26.80   12.50 
  -3   4   1   41.30   14.00 
   3   4  -1   25.40   15.90 
  -3   4   1   30.50   12.00 
   3   4  -1    3.40   11.80 
   3   4  -1   32.60   15.50 
  -3   4   1   28.90   11.60 
   3   4  -1   25.90   14.40 
  -3   4   1   29.60    9.80 
   3   4  -1   42.20   11.30 
  -3   4   1   36.20   12.60 
  -3   4   1   25.60   11.60 
   3   4  -1   19.90   15.70 
   3   4  -1   15.00   11.40 
  -3   4   1   26.90   10.50 
  -3   4   1   40.00    7.70 
   3   4  -1   23.50   12.30 
   3   4  -1   28.70   10.60 
  -3   4   1   39.30   18.20 
   2  -4  -1  226.78   32.60 
  -2  -4   1  366.66   33.00 
   2  -4  -1  341.77   47.20 
  -2  -4   1  360.26   38.60 
  -2  -4   1  348.37   23.20 
   2  -4  -1  278.77   36.50 
  -2  -4   1  338.07   25.50 
  -2  -4   1  212.38   30.70 
   2  -4  -1  286.67   25.30 
   2  -4  -1  419.06   46.80 
   2  -4  -1  344.97   43.00 
   2  -4  -1  276.47   30.60 
   2  -4  -1  270.27   30.90 
  -2  -4   1  338.57   44.50 
  -2  -4   1  285.97   43.30 
  -2  -4   1  306.77   38.20 
   2  -4  -1  342.47   22.90 
  -2  -4   1  271.97   20.30 
  -2  -4   1  279.57   35.60 
  -2  -4   1  270.47   36.60 
  -2  -4   1  316.97   40.70 
  -2  -4   1  340.77   28.80 
   2  -4  -1  312.87   23.70 
   2  -4  -1  313.47   37.10 
  -2  -4   1  311.57   39.60 
   2  -4  -1  323.17   23.40 
  -2  -4   1  310.07   40.40 
  -2   4   1  363.36   38.40 
  -2   4   1  304.87   31.80 
  -2   4   1  316.87   33.40 
  -2   4   1  299.77   30.60 
  -2   4   1  315.77   32.30 
   2   4  -1  341.47   34.10 
  -2   4   1  329.37   27.20 
   2   4  -1  331.57   27.90 
  -2   4   1  288.77   21.30 
  -2   4   1  256.87   27.90 
   2   4  -1  323.07   36.00 
  -2   4   1  315.67   25.80 
   2   4  -1  343.57   39.70 
   2   4  -1  298.07   36.00 
   2   4  -1  332.37   27.20 
  -2   4   1  320.37   37.50 
  -2   4   1  373.66   42.10 
   2   4  -1  371.56   43.40 
  -2   4   1  321.27   46.70 
  -2   4   1  327.27   24.70 
  -2   4   1  288.67   35.20 
  -2   4   1  327.27   19.00 
   2   4  -1  290.57   37.50 
   2   4  -1  236.48   33.80 
  -2   4   1  288.07   21.50 
  -2   4   1  320.97   46.40 
   2   4  -1  304.17   21.80 
   2   4  -1  275.87   37.30 
   2   4  -1  356.86   39.70 
   2   4  -1  226.08   36.30 
  -2   4   1  311.17   36.00 
   2   4  -1  388.26   46.40 
  -2   4   1  365.46   41.50 
  -2   4   1  298.27   42.80 
   2   4  -1  307.17   23.40 
  -2   4   1  335.37   27.30 
   2   4  -1  276.87   30.10 
  -2   4   1  306.57   46.80 
  -2   4   1  286.77   22.20 
   2   4  -1  273.87   34.40 
  -2   4   1  326.97   33.60 
   2   4  -1  223.18   32.40 
  -1  -4   1    8.70   13.40 
   1  -4  -1    8.60    8.50 
  -1  -4   1    1.60    9.40 
  -1  -4   1    0.70    8.50 
   1  -4  -1   -9.00    7.70 
   1  -4  -1   11.10    7.00 
   1  -4  -1   -0.20    9.50 
   1  -4  -1   17.70   11.60 
   1  -4  -1   29.00   16.50 
   1  -4  -1    6.50    6.00 
   1  -4  -1   -0.10   11.50 
  -1  -4   1    4.90   12.00 
  -1  -4   1  -11.90    8.30 
  -1  -4   1    5.40    9.70 
   1  -4  -1   11.80    8.10 
  -1  -4   1    9.60    9.30 
  -1  -4   1   13.00   13.00 
   1  -4  -1    1.50    8.70 
   1  -4  -1   -0.70    8.20 
  -1  -4   1    0.00   10.10 
  -1  -4   1    9.40   11.00 
   1  -4  -1   41.80   19.10 
   1  -4  -1    7.80    8.30 
   1  -4  -1    7.70   18.50 
   1  -4  -1   19.00   15.10 
   1  -4  -1   -3.20    8.30 
   1  -4  -1   24.70   13.00 
  -1  -4   1   -6.70    7.30 
  -1  -4   1    4.10   11.30 
   1   4  -1   -4.30    6.70 
   1   4  -1   11.40    8.20 
   1   4  -1    7.90   10.30 
  -1   4   1    6.50    5.40 
  -1   4   1   22.70   11.90 
  -1   4   1   10.80    7.30 
  -1   4   1   -8.70   11.70 
   1   4  -1   13.50    8.80 
  -1   4   1    4.40    7.60 
   1   4  -1    6.00    4.20 
  -1   4   1   28.40   20.10 
  -1   4   1    2.90    8.50 
   1   4  -1   10.20   10.90 
  -1   4   1   11.20    5.80 
   1   4  -1   -2.20    8.30 
   1   4  -1   -5.10    6.90 
   1   4  -1    8.10    8.20 
   1   4  -1    5.70    9.90 
   1   4  -1   -0.80    5.20 
   1   4  -1   -0.10    5.70 
  -1   4   1    7.80    6.00 
   1   4  -1   14.00   10.60 
  -1   4   1    4.80    7.60 
   1   4  -1    4.20   10.50 
   1   4  -1    1.90    8.20 
   1   4  -1   -1.10    6.90 
   1   4  -1   -1.20    8.80 
  -1   4   1    9.60   18.50 
   1   4  -1    1.40    3.40 
   1   4  -1    8.80    9.60 
  -1   4   1    6.90    7.00 
  -1   4   1   -2.50    6.60 
  -1   4   1    9.50    6.00 
  -1   4   1   16.90   10.80 
   0  -4  -1  346.27   26.10 
   0  -4  -1  392.36   47.90 
   0  -4   1  369.96   41.50 
   0  -4  -1  313.37   39.80 
   0  -4   1  324.67   55.49 
   0  -4  -1  445.06   70.89 
   0  -4   1  315.37   44.40 
   0  -4  -1  357.26   38.10 
   0  -4   1  361.56   60.49 
   0  -4  -1  317.37   34.30 
   0  -4   1  424.66   50.49 
   0  -4   1  429.56   31.80 
   0  -4   1  436.56   52.89 
   0  -4  -1  353.26   40.10 
   0  -4  -1  253.87   31.80 
   0  -4   1  368.26   41.90 
   0  -4  -1  367.56   43.20 
   0  -4  -1  333.07   33.60 
   0  -4   1  408.16   29.90 
   0  -4  -1  328.57   38.10 
   0  -4   1  380.26   52.09 
   0  -4  -1  360.66   39.10 
   0  -4   1  276.57   35.40 
   0  -4   1  403.46   43.30 
   0  -4   1  356.66   36.40 
   0  -4   1  356.76   19.10 
   0  -4  -1  324.87   56.69 
   0  -4  -1  397.56   43.20 
   0  -4  -1  390.66   32.80 
   0  -4  -1  338.77   27.10 
   0  -4   1  503.95   58.09 
   0  -4  -1  404.16   61.29 
   0  -4   1  329.77   35.60 
   0  -4  -1  350.76   41.50 
   0  -4   1  401.76   54.79 
   0  -4   1  376.66   40.00 
   0  -4   1  333.87   25.10 
   0  -4  -1  386.16   45.30 
   0  -4   1  382.16   27.80 
   0  -4  -1  338.17   37.30 
   0   4   1  337.17   25.70 
   0   4   1  354.76   40.70 
   0   4  -1  295.27   34.70 
   0   4  -1  368.46   39.60 
   0   4  -1  312.47   34.20 
   0   4   1  291.47   36.80 
   0   4   1  310.87   34.40 
   0   4  -1  317.27   35.10 
   0   4   1  364.76   26.30 
   0   4  -1  325.77   36.40 
   0   4   1  311.87   35.80 
   0   4  -1  344.27   27.80 
   0   4  -1  351.26   41.50 
   0   4   1  386.36   25.80 
   0   4   1  322.97   35.00 
   0   4  -1  376.46   29.80 
   0   4   1  378.56   26.70 
   0   4  -1  380.76   32.20 
   0   4  -1  281.07   34.10 
   0   4  -1  385.96   32.60 
   0   4   1  338.87   20.20 
   0   4   1  383.16   28.50 
   0   4   1  306.67   30.70 
   0   4   1  338.47   22.80 
   0   4  -1  365.96   26.00 
   0   4  -1  365.16   22.20 
   0   4   1  346.67   26.90 
   0   4  -1  313.57   36.70 
   0   4   1  468.55   41.70 
   0   4   1  389.96   42.50 
   0   4   1  378.76   41.60 
   0   4   1  351.66   41.20 
   0   4   1  346.77   38.30 
   0   4   1  302.67   36.30 
   0   4  -1  342.87   27.00 
   1  -4   1  114.39   19.70 
   1  -4   1  107.69   23.50 
   1  -4   1  128.79   26.30 
   1  -4   1   70.59   13.60 
   1  -4   1   97.69   26.50 
  -1  -4  -1  116.79   22.80 
   1  -4   1  113.69   23.00 
   1  -4   1   83.59   19.00 
  -1  -4  -1   50.49   16.60 
  -1  -4  -1   99.69   22.00 
   1  -4   1  101.49   33.70 
  -1  -4  -1   74.69   18.00 
   1  -4   1   86.09   12.20 
  -1  -4  -1  109.29   13.30 
   1  -4   1   93.79   33.80 
  -1  -4  -1  100.69   20.20 
  -1  -4  -1  107.89   20.00 
   1  -4   1  117.09   17.50 
  -1  -4  -1  110.79   25.50 
   1  -4   1  118.19   24.00 
  -1  -4  -1   90.59   31.10 
   1  -4   1   82.39   13.20 
  -1  -4  -1   76.59   20.10 
  -1  -4  -1  104.99    9.90 
   1  -4   1  136.99   25.50 
  -1  -4  -1   76.99   18.60 
  -1  -4  -1   82.19   27.50 
   1  -4   1   89.99   20.30 
  -1  -4  -1  142.99   24.30 
  -1   4  -1  113.99   20.40 
   1   4   1  110.39   23.00 
   1   4   1  117.89   23.60 
  -1   4  -1  109.59   24.90 
  -1   4  -1  110.19   22.70 
   1   4   1   98.99   19.10 
   1   4   1  128.29   22.40 
   1   4   1  121.89   25.50 
   1   4   1  114.69   20.00 
  -1   4  -1  109.29   11.10 
   1   4   1   80.69   19.10 
   1   4   1   71.19   17.10 
   1   4   1   76.99   17.80 
  -1   4  -1  128.89   19.30 
   1   4   1  101.29   22.60 
  -1   4  -1  101.29    9.80 
   1   4   1   96.79   17.80 
   1   4   1   85.99   20.90 
  -1   4  -1   83.79   16.00 
   1   4   1   87.79   21.90 
  -1   4  -1   95.19   18.60 
  -1   4  -1  107.49   20.40 
  -1   4  -1  130.89   25.30 
  -1   4  -1  153.98   27.60 
   1   4   1  112.09   21.00 
   1   4   1   96.39   17.60 
   1   4   1   81.89   20.40 
  -1   4  -1   76.49   19.50 
  -1   4  -1   96.39    9.10 
  -1   4  -1   85.19   24.20 
   1   4   1  105.29   23.80 
   1   4   1  105.29   14.90 
   1   4   1   73.69   12.40 
   2  -4   1 2450.55  106.19 
  -2  -4  -1 2634.94  117.09 
   2  -4   1 2468.15   92.49 
   2  -4   1 2439.36  118.29 
  -2  -4  -1 2517.95  106.29 
  -2  -4  -1 2468.15  109.59 
   2  -4   1 2521.75  112.49 
  -2  -4  -1 2545.15  121.29 
  -2  -4  -1 2552.94  107.19 
   2  -4   1 2238.58  106.89 
  -2  -4  -1 2529.35   88.69 
   2  -4   1 2651.43   95.19 
  -2  -4  -1 2411.96  108.89 
  -2  -4  -1 2355.76  111.39 
  -2  -4  -1 2323.87   89.09 
  -2  -4  -1 2535.35  113.19 
   2  -4   1 2517.85  113.19 
   2  -4   1 2445.76  107.39 
  -2  -4  -1 2457.35   92.29 
   2  -4   1 2518.85  107.19 
  -2  -4  -1 2531.35  117.29 
  -2  -4  -1 2442.86   96.59 
  -2  -4  -1 2429.06  106.19 
   2  -4   1 2559.84  113.49 
  -2  -4  -1 2463.75  109.89 
  -2  -4  -1 2396.06  103.09 
   2  -4   1 2563.44   96.49 
  -2   4  -1 2439.06   88.59 
   2   4   1 2424.76  113.99 
  -2   4  -1 2332.87   89.69 
  -2   4  -1 2279.87  105.59 
   2   4   1 2432.76  102.29 
   2   4   1 2421.26  104.99 
   2   4   1 2440.36   93.79 
  -2   4  -1 2420.16   88.29 
  -2   4  -1 2489.75   91.39 
  -2   4  -1 2276.67  107.39 
   2   4   1 2495.95  110.49 
   2   4   1 2473.35  107.99 
  -2   4  -1 2517.55   98.09 
  -2   4  -1 2347.67  110.59 
  -2   4  -1 2531.15  104.39 
   2   4   1 2350.16   94.29 
  -2   4  -1 2585.74  106.19 
  -2   4  -1 2295.37  103.29 
   2   4   1 2410.76   94.89 
   2   4   1 2521.75  106.19 
  -2   4  -1 2594.64   90.19 
  -2   4  -1 2429.26  115.89 
   2   4   1 2269.67  111.99 
   2   4   1 2453.75  108.89 
   2   4   1 2497.95  106.39 
   2   4   1 2458.25  104.79 
  -2   4  -1 2481.85   97.99 
  -2   4  -1 2636.24  110.29 
  -2   4  -1 2400.06   97.59 
  -2   4  -1 2468.25  105.59 
  -2   4  -1 2327.07  121.89 
   2   4   1 2429.76  112.59 
  -2   4  -1 2376.36   93.99 
   2   4   1 2320.27  112.49 
  -3  -4  -1  115.69   26.90 
  -3  -4  -1  105.59   25.90 
  -3  -4  -1  117.79   23.30 
  -3  -4  -1   76.69   21.80 
   3  -4   1  121.69   20.60 
  -3  -4  -1  121.79   31.90 
  -3  -4  -1   70.99   21.00 
  -3  -4  -1  105.19   27.90 
   3  -4   1  106.29   28.10 
   3  -4   1  122.79   21.20 
   3  -4   1  113.09   21.50 
   3  -4   1  123.19   24.10 
   3  -4   1  107.69   22.30 
   3  -4   1  103.29   20.90 
  -3  -4  -1  149.39   28.10 
  -3  -4  -1  102.39   18.50 
  -3  -4  -1  118.59   26.40 
  -3  -4  -1  139.39   23.70 
   3  -4   1  107.99   25.90 
  -3  -4  -1   91.39   27.20 
  -3  -4  -1  104.79   22.20 
  -3  -4  -1  116.19   25.50 
   3  -4   1  158.48   30.60 
  -3   4  -1  133.79   26.60 
  -3   4  -1  117.89   25.80 
   3   4   1   97.99   19.90 
  -3   4  -1  116.39   23.10 
  -3   4  -1  110.29   14.80 
  -3   4  -1  146.39   20.40 
   3   4   1  102.19   25.50 
   3   4   1   79.59   20.70 
   3   4   1  107.89   20.80 
  -3   4  -1  149.88   29.50 
   3   4   1  130.99   17.10 
  -3   4  -1  106.39   17.80 
  -3   4  -1   86.89   18.30 
   3   4   1  140.79   16.80 
  -3   4  -1  131.89   31.70 
   3   4   1   78.69   21.50 
  -3   4  -1  102.59   22.10 
  -3   4  -1  150.18   31.80 
  -3   4  -1  134.39   19.10 
   3   4   1  111.69   26.30 
  -3   4  -1  110.19   22.10 
  -3   4  -1  101.19   20.80 
   3   4   1  150.68   27.30 
   3   4   1  140.99   32.10 
   3   4   1  107.09   25.20 
  -3   4  -1   76.99   16.80 
   3   4   1  112.59   22.60 
   3   4   1  103.39   23.60 
   3   4   1  136.49   28.50 
   3   4   1  103.79   13.70 
  -4  -4  -1 1035.40   73.29 
  -4  -4  -1 1013.40   59.49 
  -4  -4  -1 1104.79   72.19 
  -4  -4  -1  961.20   79.09 
  -4  -4  -1 1139.09   79.09 
   4  -4   1 1096.59   60.49 
  -4  -4  -1  916.31   67.59 
   4  -4   1  980.40   51.59 
  -4  -4  -1 1037.00   69.29 
   4  -4   1  962.90   62.09 
   4  -4   1 1087.49   71.19 
   4  -4   1  903.41   62.49 
  -4  -4  -1 1035.00   71.99 
  -4  -4  -1 1144.09   76.19 
   4  -4   1 1045.70   72.39 
   4  -4   1 1044.00   66.99 
  -4  -4  -1  931.31   61.09 
  -4  -4  -1 1066.39   74.19 
   4  -4   1  956.10   60.59 
  -4  -4  -1 1129.99   82.09 
   4   4   1 1032.80   71.89 
   4   4   1 1118.39   77.69 
   4   4   1 1032.00   69.49 
   4   4   1 1017.30   59.99 
   4   4   1 1045.40   71.09 
   4   4   1 1059.59   73.39 
  -4   4  -1 1125.49   62.99 
  -4   4  -1 1008.80   68.49 
  -4   4  -1 1027.10   52.89 
  -4   4  -1 1043.80   62.19 
  -4   4  -1  997.60   62.39 
  -4   4  -1  993.40   53.09 
  -4   4  -1 1032.70   43.30 
   4   4   1  941.91   68.29 
   4   4   1 1142.29   73.49 
   4   4   1 1069.19   65.19 
  -4   4  -1 1018.20   66.89 
   4   4   1 1170.28   72.69 
   4   4   1  944.21   67.09 
  -4   4  -1  950.60   73.59 
  -4   4  -1 1045.40   48.30 
  -4   4  -1 1078.19   61.89 
   4   4   1 1053.49   68.19 
  -4   4  -1 1017.90   48.20 
  -4   4  -1 1097.59   62.69 
  -4   4  -1 1010.90   47.50 
   4   4   1 1040.90   64.49 
  -4   4  -1 1038.50   50.29 
  -4   4  -1 1138.79   74.19 
  -5  -4  -1   80.29   26.50 
   5  -4   1  115.19   23.70 
  -5  -4  -1  127.09   38.00 
   5  -4   1  137.19   27.80 
  -5  -4  -1  124.39   37.50 
   5  -4   1   74.19   23.90 
   5  -4   1  123.79   19.90 
  -5  -4  -1   69.09   25.60 
   5  -4   1  169.48   33.80 
  -5  -4  -1  122.59   30.20 
  -5  -4  -1  127.09   26.80 
  -5  -4  -1  136.39   32.10 
  -5  -4  -1  106.29   30.50 
   5  -4   1  123.59   30.00 
   5  -4   1  122.79   32.40 
  -5  -4  -1   84.09   27.40 
   5  -4   1   67.29   25.00 
  -5  -4  -1   81.59   29.20 
  -5  -4  -1  104.49   29.50 
  -5   4  -1  120.19   27.00 
   5   4   1  178.58   37.80 
  -5   4  -1  166.58   33.30 
   5   4   1   93.39   24.30 
  -5   4  -1  166.28   39.70 
  -5   4  -1  117.19   29.60 
  -5   4  -1  134.69   33.30 
   5   4   1  147.69   31.50 
  -5   4  -1  133.89   13.50 
   5   4   1   89.59   28.10 
  -5   4  -1  129.99   27.90 
  -5   4  -1  130.09   28.30 
   5   4   1  120.89   30.00 
   5   4   1  106.89   27.80 
   5   4   1   67.79   21.60 
   5   4   1  110.39   30.80 
   5   4   1  126.09   36.50 
   5   4   1  101.69   20.90 
   5   4   1  192.38   37.60 
   5   4   1  107.29   28.60 
  -5   4  -1  109.79   18.80 
  -5   4  -1  150.68   33.50 
  -5   4  -1  113.29   15.10 
  -5   4  -1  125.19   23.80 
   5   4   1   75.69   19.50 
   5   4   1  120.09   27.90 
   5   4   1  120.39   30.40 
  -5   4  -1  113.59   28.30 
  -5   4  -1  125.99   15.60 
   6  -4   1 2610.84  127.79 
   6  -4   1 2955.10  122.39 
   6  -4   1 2931.11  140.99 
  -6  -4  -1 2816.22  143.09 
  -6  -4  -1 2618.94  140.49 
  -6  -4  -1 2821.82  144.29 
   6  -4   1 2696.43  137.29 
  -6  -4  -1 2879.81  162.58 
  -6  -4  -1 2964.40  149.59 
   6  -4   1 2825.82  142.39 
  -6  -4  -1 2624.84  146.69 
   6  -4   1 3053.99  152.48 
  -6  -4  -1 2733.23  158.88 
   6  -4   1 2769.62  137.29 
  -6  -4  -1 2773.02  157.38 
  -6  -4  -1 2737.83  143.99 
  -6  -4  -1 2800.92  133.19 
  -6  -4  -1 2958.50  147.29 
  -6   4  -1 2695.13  115.09 
   6   4   1 2681.03  143.19 
   6   4   1 2917.61  154.88 
   6   4   1 2845.12  141.49 
   6   4   1 2867.51  138.09 
   6   4   1 2716.23  145.09 
  -6   4  -1 2760.72  121.89 
  -6   4  -1 3136.29  144.09 
  -6   4  -1 3022.40  141.09 
   6   4   1 2806.52  142.89 
   6   4   1 2819.82  134.89 
   6   4   1 2802.92  146.59 
  -6   4  -1 2751.32  137.89 
  -6   4  -1 2853.21  153.48 
  -6   4  -1 2825.02  148.39 
   6   4   1 3035.90  154.38 
  -6   4  -1 2872.41  143.19 
   6   4   1 2933.31  117.59 
  -6   4  -1 2864.11  123.79 
   6   4   1 2879.81  110.29 
   6   4   1 2947.10  130.19 
  -6   4  -1 2776.32  135.69 
  -6   4  -1 3037.90  143.29 
  -6   4  -1 2839.42  142.39 
  -6   4  -1 2809.12  131.79 
   6   4   1 3091.39  149.69 
  -6   4  -1 2865.81  132.49 
   6   4   1 2758.22  145.29 
   6   4   1 2793.12  144.99 
  -7  -4  -1   47.50   23.20 
  -7  -4  -1   49.30   28.00 
   7  -4   1   47.10   29.50 
  -7  -4  -1   92.79   33.30 
  -7  -4  -1  110.69   32.80 
  -7  -4  -1   51.99   28.00 
  -7  -4  -1   90.29   36.60 
  -7  -4  -1   65.59   32.60 
   7  -4   1   54.39   28.00 
  -7  -4  -1   43.70   28.70 
  -7  -4  -1   51.79   26.40 
   7  -4   1   75.89   28.00 
   7  -4   1   90.49   27.90 
  -7  -4  -1  108.29   32.70 
   7  -4   1   50.49   28.00 
  -7  -4  -1   46.70   32.00 
   7   4   1   49.00   24.30 
   7   4   1   47.10   27.10 
  -7   4  -1   39.70   22.10 
  -7   4  -1   94.99   31.90 
  -7   4  -1   47.80   27.50 
  -7   4  -1   58.39   22.60 
  -7   4  -1   80.19   25.60 
  -7   4  -1   77.09   28.10 
  -7   4  -1  103.09   34.00 
  -7   4  -1   78.39   32.20 
   7   4   1   85.49   31.40 
   7   4   1   85.79   25.10 
   7   4   1   52.09   24.80 
   7   4   1   27.50   19.90 
   7   4   1   60.69   28.10 
   7   4   1   97.39   34.00 
   7   4   1   28.10   20.00 
   7   4   1   92.29   32.50 
  -7   4  -1   54.69   27.80 
  -7   4  -1   45.30   24.60 
  -7   4  -1   48.80   30.50 
  -7   4  -1   34.50   23.60 
  -7   4  -1   83.49   28.20 
  -7   4  -1   86.39   29.00 
   7   4   1   20.70   18.30 
   7   4   1   47.40   26.10 
  -8  -4  -1 1974.20  121.59 
  -8  -4  -1 1966.10  136.09 
   8  -4   1 1989.90  128.79 
  -8  -4  -1 2217.78  133.99 
   8  -4   1 1957.40  137.29 
  -8  -4  -1 2268.87  144.89 
  -8  -4  -1 2099.09  152.38 
  -8  -4  -1 2332.97  139.39 
  -8  -4  -1 1993.40  123.99 
  -8  -4  -1 2075.39  150.18 
  -8  -4  -1 2012.40  129.29 
  -8  -4  -1 2016.90  128.79 
  -8  -4  -1 2067.69  151.98 
   8  -4   1 2094.59  132.09 
   8  -4   1 2096.19  136.09 
  -8   4  -1 1921.01  121.49 
  -8   4  -1 2224.08  126.09 
  -8   4  -1 2032.60  133.29 
  -8   4  -1 2222.98  134.49 
  -8   4  -1 2155.18  146.59 
   8   4   1 1925.81  129.39 
  -8   4  -1 2125.09  129.99 
   8   4   1 2075.49  136.59 
  -8   4  -1 2258.67  125.79 
  -8   4  -1 2082.59  130.69 
   8   4   1 2080.99  139.79 
   8   4   1 2528.55  143.19 
   8   4   1 2036.30  135.49 
   8   4   1 2211.58  126.69 
   8   4   1 2220.58  137.49 
  -8   4  -1 1973.00  128.49 
  -8   4  -1 2256.27  139.49 
   8   4   1 2144.49  141.59 
   8   4   1 2115.69  136.19 
  -8   4  -1 2141.89  143.39 
  -8   4  -1 1962.70  128.19 
  -8   4  -1 2104.89  122.59 
   8   4   1 1892.31  130.79 
  -8   4  -1 2441.26  134.39 
   8   4   1 1871.41  135.29 
  -9  -4  -1   97.69   38.20 
  -9  -4  -1   28.10   36.10 
  -9  -4  -1  -12.40   22.40 
  -9  -4  -1   35.50   33.20 
  -9  -4  -1   74.39   37.20 
  -9  -4  -1   61.69   33.00 
  -9  -4  -1   32.00   39.60 
  -9  -4  -1   -7.90   20.90 
  -9  -4  -1    5.50   20.50 
  -9  -4  -1   21.00   23.40 
  -9  -4  -1   50.09   28.90 
  -9  -4  -1   45.00   29.80 
   9   4   1   26.50   27.50 
  -9   4  -1    1.20   20.40 
   9   4   1   20.00   26.40 
  -9   4  -1   88.89   35.80 
   9   4   1   49.70   28.70 
  -9   4  -1   64.19   33.30 
  -9   4  -1   42.50   37.00 
   9   4   1   63.59   34.20 
   9   4   1   99.89   38.70 
  -9   4  -1   30.10   27.90 
  -9   4  -1   15.50   21.30 
  -9   4  -1   33.50   29.80 
   9   4   1   40.70   27.40 
  -9   4  -1   67.59   36.00 
   9   4   1   76.99   37.10 
   9   4   1   43.10   32.00 
   9   4   1   50.29   29.90 
  -9   4  -1   19.60   30.60 
  -9   4  -1   22.10   23.70 
   9   4   1   -5.10   21.50 
  -9   4  -1   22.20   26.50 
  -9  -5   1   80.69   40.50 
  -9  -5   1   97.29   40.20 
  -9  -5   1  166.58   46.30 
  -9  -5   1  150.68   45.70 
  -9  -5   1   95.89   45.90 
  -9  -5   1  104.89   43.00 
  -9  -5   1  104.89   48.00 
  -9  -5   1   77.29   39.00 
  -9  -5   1  138.59   58.89 
  -9  -5   1   32.00   31.80 
  -9  -5   1   99.39   32.80 
   9   5  -1   82.89   45.60 
   9   5  -1   88.49   38.50 
  -9   5   1   96.49   57.19 
   9   5  -1   53.19   34.50 
   9   5  -1  166.78   54.39 
  -9   5   1   76.49   38.10 
   9   5  -1  158.08   51.99 
   9   5  -1  104.19   45.50 
   9   5  -1   79.89   37.10 
  -9   5   1   87.89   66.99 
  -9   5   1   91.99   36.00 
   9   5  -1   50.29   32.50 
   9   5  -1   73.09   39.20 
  -9   5   1  120.49   46.80 
  -9   5   1   85.39   40.00 
   9   5  -1   81.89   42.30 
  -9   5   1   52.89   32.70 
  -9   5   1  104.29   37.70 
  -9   5   1  109.79   46.80 
  -9   5   1   94.59   39.90 
  -9   5   1   56.79   35.60 
  -8  -5   1   -9.90   19.50 
  -8  -5   1   -9.60   18.10 
  -8  -5   1   -5.00   20.40 
  -8  -5   1    1.20   20.90 
  -8  -5   1   35.30   20.50 
  -8  -5   1   18.20   22.90 
  -8  -5   1  -13.50   18.40 
  -8  -5   1   -2.10   18.00 
  -8  -5   1    6.70   16.20 
  -8  -5   1   -0.50   18.40 
   8  -5  -1    6.90   18.40 
  -8  -5   1   16.50   33.60 
   8   5  -1    2.60   21.30 
   8   5  -1   10.20   20.00 
  -8   5   1    6.50   23.40 
  -8   5   1    8.60   19.60 
   8   5  -1    8.80   20.50 
  -8   5   1   31.90   25.40 
  -8   5   1   43.50   29.00 
  -8   5   1   14.80   22.60 
   8   5  -1    8.00   22.30 
   8   5  -1    6.40   22.00 
   8   5  -1    6.10   21.10 
  -8   5   1    5.40   18.30 
   8   5  -1    6.40   16.90 
  -8   5   1   -6.00   16.30 
  -8   5   1   26.80   21.70 
   8   5  -1   10.70   20.10 
  -8   5   1   29.10   26.40 
   8   5  -1  -12.30   17.90 
  -8   5   1   26.40   32.80 
  -8   5   1   24.30   21.90 
   8   5  -1    4.90   20.80 
  -8   5   1   13.70   17.10 
  -7  -5   1  575.94   93.89 
  -7  -5   1  577.04   90.99 
  -7  -5   1  749.03   93.19 
  -7  -5   1  577.34   78.99 
   7  -5  -1  793.22   91.29 
   7  -5  -1  654.53   75.79 
  -7  -5   1  672.53   87.59 
  -7  -5   1  783.52   91.79 
   7  -5  -1  651.53   75.99 
  -7  -5   1  750.52   78.99 
  -7  -5   1  676.03   75.89 
  -7  -5   1  601.44   82.79 
  -7  -5   1  619.04   89.39 
  -7  -5   1  611.44   80.09 
   7   5  -1  623.14   73.09 
  -7   5   1  478.15   71.19 
   7   5  -1  572.74   76.79 
  -7   5   1  610.34   66.19 
  -7   5   1  610.64   75.49 
  -7   5   1  702.43   73.09 
  -7   5   1  742.93   93.09 
   7   5  -1  661.13  120.99 
   7   5  -1  487.15   68.59 
  -7   5   1  635.74   82.79 
   7   5  -1  586.14   80.19 
   7   5  -1  600.54   76.39 
   7   5  -1  645.44   91.09 
   7   5  -1  770.82   83.09 
   7   5  -1  693.03   78.79 
   7   5  -1  675.23   89.89 
  -7   5   1  532.35   68.49 
   7   5  -1  676.53   86.79 
   7   5  -1  593.64   83.09 
   7   5  -1  536.45   79.09 
  -7   5   1  759.02   79.89 
   7   5  -1  811.02   98.09 
  -7   5   1  548.35   76.79 
  -7   5   1  566.74   77.49 
  -7   5   1  735.93   86.79 
  -7   5   1  659.43   73.69 
   6  -5  -1   -3.50   13.60 
  -6  -5   1    1.60   19.00 
  -6  -5   1   14.80   21.30 
  -6  -5   1  -11.00   19.60 
  -6  -5   1   -4.90   12.20 
   6  -5  -1    6.80   11.90 
   6  -5  -1   -1.60   11.50 
  -6  -5   1  -11.40   15.50 
  -6  -5   1   10.90   13.00 
   6  -5  -1    2.50   13.10 
   6  -5  -1   21.20   19.90 
  -6  -5   1   -0.20   15.90 
  -6  -5   1    6.40   13.20 
  -6  -5   1    7.40   13.70 
  -6  -5   1    4.50   16.50 
  -6  -5   1    5.60   16.30 
  -6  -5   1    0.10   15.20 
   6  -5  -1   12.70   15.10 
  -6   5   1   -1.40   10.70 
  -6   5   1    1.30   11.80 
  -6   5   1   -4.80   14.10 
  -6   5   1   -5.80   13.70 
  -6   5   1   -0.10   13.70 
   6   5  -1   -6.00    9.90 
  -6   5   1  -21.70   11.60 
  -6   5   1    2.60   13.60 
  -6   5   1    4.50   15.40 
   6   5  -1    5.60   14.00 
   6   5  -1    6.60   15.00 
   6   5  -1   12.40   19.20 
  -6   5   1   18.50   15.70 
   6   5  -1   -7.50   12.60 
   6   5  -1   -6.80   10.20 
  -6   5   1    4.40   15.70 
  -6   5   1  -12.20   11.70 
  -6   5   1    1.90   12.00 
   6   5  -1    8.80   15.50 
  -6   5   1    7.30   20.90 
   6   5  -1  -10.80   14.80 
   6   5  -1    9.60   16.30 
   6   5  -1    7.50   13.00 
   6   5  -1   12.60   19.80 
   6   5  -1    7.30   16.70 
   6   5  -1   -1.20   11.70 
   6   5  -1   -4.50   12.90 
   6   5  -1   -5.20   14.20 
   6   5  -1   -8.00   10.10 
   5  -5  -1 2459.35  118.99 
  -5  -5   1 2427.16  134.49 
  -5  -5   1 2293.27  125.69 
  -5  -5   1 2268.07  139.59 
   5  -5  -1 2401.46  111.09 
   5  -5  -1 2376.86  113.79 
   5  -5  -1 2349.06  114.89 
   5  -5  -1 2256.57  111.09 
  -5  -5   1 2286.57  114.19 
   5  -5  -1 2372.96  110.89 
  -5  -5   1 2413.56  109.29 
  -5  -5   1 2376.96  131.59 
  -5  -5   1 2401.76  112.69 
   5  -5  -1 2191.38  114.89 
  -5  -5   1 2348.86  136.29 
  -5  -5   1 2123.49  122.19 
   5  -5  -1 2284.27  111.19 
  -5  -5   1 2319.07  127.39 
   5  -5  -1 2430.06  109.79 
  -5  -5   1 2185.58  125.79 
  -5  -5   1 2362.06  131.39 
  -5   5   1 2260.27  127.59 
   5   5  -1 2330.57  125.59 
  -5   5   1 2219.98  106.49 
   5   5  -1 2212.08  129.29 
  -5   5   1 2309.97  118.99 
   5   5  -1 2291.67  118.09 
   5   5  -1 2205.18  108.69 
  -5   5   1 2418.86  128.19 
  -5   5   1 2229.58  114.79 
  -5   5   1 2425.36  105.99 
   5   5  -1 2367.76  127.19 
  -5   5   1 2378.76  103.89 
   5   5  -1 2337.47  121.59 
   5   5  -1 2407.26  111.39 
   5   5  -1 2322.77  130.99 
   5   5  -1 2133.89  122.19 
  -5   5   1 2517.05  106.09 
   5   5  -1 2303.57  105.49 
  -5   5   1 2443.26  112.99 
  -5   5   1 2406.96  107.99 
  -5   5   1 2440.86  129.39 
  -5   5   1 2209.88  113.39 
  -5   5   1 2446.96  122.89 
   5   5  -1 2358.86  130.59 
   5   5  -1 2375.76  120.09 
   5   5  -1 2274.17  124.19 
   5   5  -1 2406.56  117.19 
   5   5  -1 2374.96  128.09 
   4  -5  -1   24.70   14.90 
   4  -5  -1   43.60   18.60 
   4  -5  -1   25.50   16.60 
  -4  -5   1   25.30   12.40 
  -4  -5   1   15.40   14.30 
  -4  -5   1   18.10   16.60 
   4  -5  -1   10.10   12.00 
   4  -5  -1   14.90   12.10 
   4  -5  -1   34.10   17.50 
  -4  -5   1   36.50   19.50 
  -4  -5   1   11.00   15.60 
   4  -5  -1   15.80   13.90 
  -4  -5   1   34.10   16.90 
  -4  -5   1   20.90   16.00 
   4  -5  -1   26.30   15.10 
  -4  -5   1   24.70   14.00 
  -4  -5   1   44.00   20.60 
  -4  -5   1   33.20   20.70 
  -4  -5   1    1.50   15.20 
   4  -5  -1   16.70   11.20 
  -4  -5   1   -2.30   10.60 
   4   5  -1   33.30   15.10 
  -4   5   1   40.90   21.90 
  -4   5   1   22.70   12.80 
  -4   5   1   38.60   16.40 
   4   5  -1   39.00   15.40 
  -4   5   1    7.30   11.00 
   4   5  -1    1.90   10.00 
  -4   5   1   -6.70   13.30 
   4   5  -1   47.20   22.70 
   4   5  -1   55.29   21.30 
  -4   5   1   11.50   14.20 
   4   5  -1   29.30   14.60 
  -4   5   1   17.90   13.90 
   4   5  -1   13.40   13.00 
   4   5  -1   27.70   17.40 
   4   5  -1   -2.20   10.30 
   4   5  -1   11.50   13.60 
  -4   5   1   22.40   12.60 
  -4   5   1   24.00   11.90 
  -4   5   1   13.00   13.60 
   4   5  -1   26.90   15.80 
   4   5  -1    8.80   19.20 
   4   5  -1   17.80   17.50 
   4   5  -1   32.20   17.80 
  -4   5   1   28.50   16.70 
  -4   5   1   35.00   15.90 
  -4   5   1   19.50   15.00 
   4   5  -1   21.20   17.10 
   4   5  -1   20.80   12.60 
   3  -5  -1 2271.17   96.89 
  -3  -5   1 2293.37  110.89 
  -3  -5   1 2227.88   89.39 
  -3  -5   1 2263.87  117.79 
  -3  -5   1 2567.14  117.59 
   3  -5  -1 1961.30  107.49 
  -3  -5   1 2158.28  109.19 
  -3  -5   1 1906.21  113.69 
   3  -5  -1 2464.65  112.29 
   3  -5  -1 2112.59  120.19 
   3  -5  -1 2362.36  104.09 
   3  -5  -1 2237.78  118.29 
  -3  -5   1 2243.28   88.09 
  -3  -5   1 2156.58  111.29 
  -3  -5   1 2252.77  115.09 
  -3  -5   1 2329.17  127.39 
  -3  -5   1 2256.57  117.29 
   3  -5  -1 2222.78   91.19 
   3  -5  -1 2363.86   98.49 
  -3  -5   1 2051.49  108.19 
   3   5  -1 2114.19  112.09 
  -3   5   1 2308.27  117.09 
   3   5  -1 2266.37  115.69 
   3   5  -1 2025.70  106.49 
  -3   5   1 2203.48   88.19 
   3   5  -1 2327.57  106.29 
  -3   5   1 2222.98   74.79 
   3   5  -1 2291.07  108.19 
  -3   5   1 2200.98   99.79 
  -3   5   1 2342.47   98.79 
  -3   5   1 2331.17   97.99 
  -3   5   1 1956.90  103.09 
  -3   5   1 2198.68  119.09 
   3   5  -1 2164.58   94.49 
   3   5  -1 2280.17  103.79 
   3   5  -1 2307.37  111.69 
  -3   5   1 2218.38   88.69 
  -3   5   1 2104.09   76.99 
   3   5  -1 2048.30  114.39 
  -3   5   1 2202.68  108.39 
   3   5  -1 2304.17   89.99 
  -3   5   1 2160.78   99.69 
   3   5  -1 2065.59   91.79 
   3   5  -1 2399.16  120.89 
   3   5  -1 2188.38  108.99 
   3   5  -1 2410.46  103.29 
   3   5  -1 2211.88  112.89 
  -3   5   1 2225.28   97.29 
  -3   5   1 2208.58   90.79 
   3   5  -1 2270.67   93.99 
  -2  -5   1   27.20   15.10 
   2  -5  -1   50.79   21.60 
   2  -5  -1   35.90   17.20 
   2  -5  -1   14.50   16.40 
  -2  -5   1    3.90   11.40 
  -2  -5   1   33.60   16.50 
  -2  -5   1   34.00    8.30 
   2  -5  -1   51.49   14.90 
   2  -5  -1   58.59   16.70 
   2  -5  -1   36.50   14.20 
  -2  -5   1   71.69   20.50 
  -2  -5   1   77.09   23.20 
   2  -5  -1   20.50   14.60 
  -2  -5   1   46.70   17.70 
   2  -5  -1   36.20   10.20 
  -2  -5   1   17.60   14.20 
  -2  -5   1   50.29   23.20 
  -2  -5   1   40.70   18.20 
  -2  -5   1   33.80   18.90 
   2  -5  -1   54.29   14.60 
   2  -5  -1   20.40   13.40 
   2   5  -1   27.80   12.30 
   2   5  -1   37.80   10.60 
  -2   5   1   27.50   11.60 
   2   5  -1   27.60   13.80 
  -2   5   1   35.00   15.50 
  -2   5   1   38.20   11.00 
   2   5  -1   58.59   17.30 
   2   5  -1   50.09   17.20 
  -2   5   1   37.70   18.20 
   2   5  -1   40.40   16.10 
  -2   5   1   30.20    8.50 
   2   5  -1   41.20   17.30 
   2   5  -1   31.60   17.30 
   2   5  -1   30.80   15.50 
   2   5  -1   39.60   16.90 
   2   5  -1   43.90   14.40 
  -2   5   1   52.69   16.90 
   2   5  -1   38.70   19.80 
  -2   5   1   43.90   15.80 
   2   5  -1   26.70   14.30 
   2   5  -1   46.20   19.80 
  -2   5   1   27.80   13.20 
  -2   5   1   39.60   18.80 
   2   5  -1   59.69   21.80 
   2   5  -1   46.30    9.60 
  -2   5   1   44.10   18.40 
  -2   5   1   43.10   11.70 
  -2   5   1   34.50   13.00 
   2   5  -1    4.10   13.30 
  -2   5   1   35.60   13.30 
  -2   5   1   35.70    9.50 
  -2   5   1   19.50   16.90 
   1  -5  -1 1313.97   59.99 
   1  -5  -1 1382.36   78.89 
   1  -5  -1 1470.85   84.39 
  -1  -5   1 1482.45   82.69 
   1  -5  -1 1468.45   82.39 
  -1  -5   1 1325.27   83.49 
   1  -5  -1 1443.56   87.29 
   1  -5  -1 1470.55   66.39 
   1  -5  -1 1262.27   88.29 
  -1  -5   1 1484.45   81.89 
   1  -5  -1 1453.25   79.39 
  -1  -5   1 1372.06   80.59 
   1  -5  -1 1557.74  117.69 
   1  -5  -1 1574.24   81.89 
  -1  -5   1 1359.16   71.69 
  -1  -5   1 1443.16   83.29 
   1  -5  -1 1403.26   65.99 
   1  -5  -1 1687.13   77.29 
  -1  -5   1 1514.45   81.59 
  -1  -5   1 1501.75   94.29 
   1  -5  -1 1440.96   62.69 
  -1  -5   1 1590.14  104.69 
  -1  -5   1 1432.86   82.39 
   1  -5  -1 1329.97   81.49 
   1  -5  -1 1497.75   85.39 
  -1   5   1 1497.45   69.39 
  -1   5   1 1438.86   73.39 
   1   5  -1 1392.76   79.49 
  -1   5   1 1468.25   79.59 
   1   5  -1 1473.45   71.19 
   1   5  -1 1613.74   79.89 
  -1   5   1 1435.66   80.49 
   1   5  -1 1483.25   68.29 
  -1   5   1 1496.95   64.79 
  -1   5   1 1503.55   92.49 
   1   5  -1 1474.05   84.69 
   1   5  -1 1540.05   74.39 
   1   5  -1 1408.16   66.39 
   1   5  -1 1422.76   71.79 
   1   5  -1 1340.17   74.79 
  -1   5   1 1614.14   85.79 
   1   5  -1 1521.15   78.19 
  -1   5   1 1456.95   67.29 
  -1   5   1 1457.35   59.39 
  -1   5   1 1427.26   55.19 
   1   5  -1 1502.25   80.09 
  -1   5   1 1514.65   82.99 
   1   5  -1 1426.16   82.39 
  -1   5   1 1498.85   58.19 
   1   5  -1 1569.54   77.79 
   1   5  -1 1343.67   61.89 
   1   5  -1 1498.25   59.49 
   1   5  -1 1419.56   81.99 
  -1   5   1 1481.45   81.59 
  -1   5   1 1409.86   66.79 
   1   5  -1 1516.15   76.19 
  -1   5   1 1505.85   65.49 
  -1   5   1 1581.24   80.59 
   1   5  -1 1339.67   77.99 
   0  -5   1  205.68   24.20 
   0  -5  -1  132.09   30.70 
   0  -5   1  181.78   24.80 
   0  -5   1  241.38   52.09 
   0  -5   1  125.79   33.90 
   0  -5  -1  187.48   32.90 
   0  -5   1  232.48   33.90 
   0  -5   1  184.28   13.60 
   0  -5  -1  162.08   35.50 
   0  -5   1  170.58   47.70 
   0  -5   1  112.19   26.10 
   0  -5  -1  142.89   42.30 
   0  -5   1  162.08   39.20 
   0  -5  -1  140.79   39.40 
   0  -5  -1  112.19   41.50 
   0  -5  -1  150.78   30.80 
   0  -5   1  146.89   26.10 
   0  -5  -1  138.39   28.70 
   0  -5  -1  252.77   35.70 
   0  -5  -1  168.68   33.10 
   0  -5   1  163.68   30.80 
   0  -5   1  117.99   26.10 
   0  -5   1  197.38   43.80 
   0  -5  -1  190.98   31.50 
   0  -5   1  224.48   39.00 
   0  -5  -1  206.38   38.90 
   0  -5  -1  202.48   30.50 
   0  -5  -1  215.58   29.30 
   0  -5   1  151.68   28.90 
   0  -5  -1  201.18   27.80 
   0  -5   1  223.18   23.40 
   0  -5  -1  158.98   29.50 
   0   5   1  172.58   31.00 
   0   5  -1  171.48   23.10 
   0   5   1  242.18   38.70 
   0   5  -1  223.58   36.20 
   0   5   1  179.88   17.70 
   0   5  -1  178.58   26.30 
   0   5   1  207.28   30.60 
   0   5   1  204.58   25.40 
   0   5  -1  145.29   22.10 
   0   5   1  214.78   32.90 
   0   5   1  169.08   28.50 
   0   5  -1  204.58   34.60 
   0   5   1  217.48   33.60 
   0   5   1  231.18   29.30 
   0   5   1  188.58   26.40 
   0   5  -1  161.88   26.70 
   0   5   1  189.68   31.40 
   0   5   1  186.48   15.00 
   0   5  -1  190.38   33.70 
   0   5  -1  238.48   37.10 
   0   5  -1  266.87   36.10 
   0   5  -1  164.38   27.50 
   0   5   1  167.58   23.50 
   0   5   1  167.28   24.10 
   0   5  -1  179.68   28.10 
   0   5  -1  215.78   28.60 
   0   5   1  196.18   30.50 
   0   5  -1  160.38   27.20 
   0   5  -1  163.98   25.30 
   0   5   1  192.48   32.90 
   0   5  -1  195.98   17.20 
   0   5  -1  186.18   19.50 
   0   5   1  240.18   37.10 
   0   5   1  168.28   32.10 
   0   5  -1  162.68   29.20 
  -1  -5  -1 3824.02  152.38 
  -1  -5  -1 3633.94  160.78 
   1  -5   1 3755.82  157.08 
   1  -5   1 3809.92  156.78 
   1  -5   1 3775.22  145.69 
   1  -5   1 3591.54  157.88 
   1  -5   1 3576.64  152.18 
  -1  -5  -1 3533.25  142.99 
  -1  -5  -1 3737.13  150.18 
  -1  -5  -1 3074.69  171.08 
  -1  -5  -1 3641.34  151.88 
   1  -5   1 3312.67  172.78 
   1  -5   1 3708.33  157.58 
   1  -5   1 3757.22  184.28 
   1  -5   1 3690.13  124.69 
  -1  -5  -1 3828.02  156.98 
   1  -5   1 3746.03  126.39 
  -1  -5  -1 3875.91  147.19 
  -1  -5  -1 3742.53  177.38 
  -1  -5  -1 3535.65  186.88 
  -1  -5  -1 3969.10  160.28 
   1  -5   1 3596.34  151.48 
  -1  -5  -1 3664.53  144.59 
   1  -5   1 3870.41  128.19 
   1  -5   1 3727.03  152.88 
   1  -5   1 3572.74  143.59 
   1   5   1 3835.22  145.09 
  -1   5  -1 3830.92  150.08 
   1   5   1 3670.33  150.18 
   1   5   1 3557.04  123.09 
  -1   5  -1 3593.34  147.39 
   1   5   1 3790.42  150.48 
  -1   5  -1 3748.12  135.69 
   1   5   1 3687.13  144.69 
   1   5   1 3782.02  126.29 
   1   5   1 3758.32  138.49 
  -1   5  -1 3794.72  142.19 
   1   5   1 3658.33  156.28 
  -1   5  -1 3645.64  137.29 
  -1   5  -1 3679.53  134.69 
   1   5   1 3798.62  138.69 
   1   5   1 3937.21  158.78 
  -1   5  -1 3880.51  144.79 
  -1   5  -1 3717.23  140.19 
   1   5   1 3814.12  156.28 
   1   5   1 3700.73  141.79 
   1   5   1 3812.42  152.58 
   1   5   1 3653.03  151.68 
  -1   5  -1 3673.63  146.69 
  -1   5  -1 3614.54  153.38 
   1   5   1 3699.03  143.79 
  -1   5  -1 3587.94  153.08 
  -1   5  -1 3764.82  145.89 
   1   5   1 3885.01  143.79 
   1   5   1 3763.62  142.59 
  -2  -5  -1   55.29   15.70 
  -2  -5  -1   82.99   12.40 
   2  -5   1   77.09   25.60 
  -2  -5  -1   90.29   24.10 
  -2  -5  -1   59.59   14.20 
   2  -5   1   70.19   21.10 
  -2  -5  -1   53.89   20.50 
  -2  -5  -1  100.79   25.20 
   2  -5   1   79.69   27.50 
  -2  -5  -1   52.69   25.80 
   2  -5   1   73.79   20.80 
   2  -5   1   61.29   15.80 
  -2  -5  -1   58.39   18.60 
   2  -5   1   43.00   21.90 
   2  -5   1   66.69   21.60 
  -2  -5  -1   84.89   22.10 
  -2  -5  -1   56.29   20.60 
  -2  -5  -1   79.99   25.40 
   2  -5   1   80.49   17.10 
  -2  -5  -1   56.09   19.70 
  -2  -5  -1   50.29   22.60 
  -2   5  -1   62.39   19.90 
   2   5   1   92.29   24.00 
   2   5   1   69.39   21.70 
   2   5   1   73.49   23.40 
   2   5   1   46.60   18.70 
  -2   5  -1   89.09   17.30 
   2   5   1   74.79   16.70 
  -2   5  -1   64.69   15.20 
   2   5   1   38.70   16.60 
   2   5   1   88.09   22.40 
  -2   5  -1   90.29   25.50 
  -2   5  -1   76.89   26.70 
  -2   5  -1   70.09   12.60 
  -2   5  -1   51.99   21.70 
   2   5   1   74.59   19.10 
  -2   5  -1   56.79   15.40 
  -2   5  -1  100.09   24.30 
   2   5   1   77.59   21.10 
  -2   5  -1  119.79   22.30 
   2   5   1   53.09   19.50 
   2   5   1   57.19   20.00 
   2   5   1   48.20   18.90 
  -2   5  -1   65.79   22.20 
  -2   5  -1   63.59   11.10 
   2   5   1   61.69   14.50 
  -2   5  -1   63.09   14.00 
   2   5   1   49.90   20.00 
   2   5   1  101.19   21.20 
  -2   5  -1   79.99   12.30 
  -2   5  -1   69.19   16.90 
  -2   5  -1   60.89   23.30 
  -2   5  -1   44.40   16.30 
   3  -5   1 3246.98  126.89 
  -3  -5  -1 3285.37  145.39 
   3  -5   1 3097.09  142.39 
  -3  -5  -1 3103.19  150.18 
  -3  -5  -1 3309.17  147.89 
  -3  -5  -1 3437.76  151.78 
  -3  -5  -1 3307.07  122.59 
  -3  -5  -1 3195.98  139.09 
   3  -5   1 3253.67  124.09 
   3  -5   1 3345.97  143.69 
   3  -5   1 3216.58  138.39 
   3  -5   1 3211.48  138.79 
  -3  -5  -1 3363.16  143.99 
  -3  -5  -1 3170.58  142.79 
  -3  -5  -1 3283.77  137.99 
  -3  -5  -1 2912.31  149.09 
  -3  -5  -1 3466.75  120.49 
  -3  -5  -1 3192.88  165.08 
  -3  -5  -1 3348.76  160.78 
   3  -5   1 3050.99  160.38 
  -3   5  -1 3297.37  137.49 
  -3   5  -1 3198.18  148.19 
  -3   5  -1 3230.98  139.19 
   3   5   1 3250.87  143.09 
   3   5   1 3021.50  143.89 
  -3   5  -1 3220.98  151.98 
   3   5   1 3243.18  127.89 
  -3   5  -1 3295.27  117.79 
  -3   5  -1 3241.78  115.49 
   3   5   1 3328.87  118.79 
   3   5   1 2806.42  144.89 
   3   5   1 3452.75  147.79 
   3   5   1 3205.18  118.79 
  -3   5  -1 3000.50  143.69 
   3   5   1 3191.98  115.09 
  -3   5  -1 3126.59  120.99 
   3   5   1 3267.97  139.19 
  -3   5  -1 3276.37  121.99 
  -3   5  -1 3374.96  139.19 
   3   5   1 3226.88  139.59 
  -3   5  -1 3241.88  141.59 
   3   5   1 3355.66  151.58 
  -3   5  -1 2949.80  137.79 
   3   5   1 3235.98  139.49 
   3   5   1 3035.60  148.49 
   3   5   1 3269.27  138.69 
  -3   5  -1 3313.07  124.09 
   3   5   1 3197.58  127.89 
  -3   5  -1 3207.08  125.99 
  -3   5  -1 3290.77  139.39 
   4  -5   1   -0.90   14.90 
  -4  -5  -1    9.80   14.20 
  -4  -5  -1   14.50   19.80 
  -4  -5  -1  -11.00    6.80 
  -4  -5  -1   -1.30   12.20 
  -4  -5  -1    7.20   17.50 
   4  -5   1    7.70   13.60 
  -4  -5  -1  -12.10    8.70 
  -4  -5  -1   -5.20    9.40 
  -4  -5  -1   -8.20    8.90 
  -4  -5  -1    5.40   14.70 
  -4  -5  -1    0.90   11.40 
   4  -5   1   -6.00    8.20 
   4  -5   1   -4.50   11.90 
   4  -5   1   24.50   15.60 
  -4  -5  -1   -0.60   13.20 
   4  -5   1   -7.00    9.30 
  -4  -5  -1   11.70   13.90 
   4  -5   1   13.00   10.30 
   4   5   1    1.30    4.80 
   4   5   1   14.60   12.00 
  -4   5  -1   26.00   16.00 
  -4   5  -1   -4.30    8.40 
  -4   5  -1    6.30    8.80 
  -4   5  -1    9.80   14.70 
  -4   5  -1    1.00   11.00 
  -4   5  -1    1.00   18.00 
   4   5   1   -8.90    9.80 
   4   5   1   -9.90   10.70 
   4   5   1    0.40   10.40 
   4   5   1    7.30   12.40 
   4   5   1   -2.50   11.90 
  -4   5  -1    3.20    7.30 
   4   5   1    8.80   12.80 
   4   5   1   -3.30   11.90 
   4   5   1    4.40    9.60 
   4   5   1    2.40    9.60 
  -4   5  -1    7.00   14.30 
   4   5   1   11.40    8.40 
  -4   5  -1    9.20   10.30 
   4   5   1   10.80   14.60 
   4   5   1   20.40   14.60 
  -4   5  -1    1.40    8.60 
  -4   5  -1   13.90   14.10 
   5  -5   1  430.46   56.49 
  -5  -5  -1  432.46   71.99 
   5  -5   1  399.56   50.09 
  -5  -5  -1  553.44   70.59 
  -5  -5  -1  391.06   61.79 
  -5  -5  -1  356.96   56.79 
   5  -5   1  466.05   62.79 
   5  -5   1  480.15   52.09 
   5  -5   1  461.25   34.70 
  -5  -5  -1  349.47   43.50 
  -5  -5  -1  539.75   65.29 
  -5  -5  -1  408.16   57.19 
  -5  -5  -1  440.26   64.19 
  -5  -5  -1  372.66   55.69 
  -5  -5  -1  400.66   60.99 
   5  -5   1  425.86   54.89 
   5  -5   1  366.96   53.99 
  -5  -5  -1  327.07   65.39 
   5   5   1  420.56   52.89 
  -5   5  -1  406.06   58.89 
  -5   5  -1  407.16   51.29 
   5   5   1  391.16   58.39 
   5   5   1  434.96   64.59 
  -5   5  -1  448.96   54.79 
   5   5   1  539.05   66.39 
  -5   5  -1  454.15   51.99 
   5   5   1  473.65   62.29 
   5   5   1  480.95   62.29 
   5   5   1  481.45   49.99 
  -5   5  -1  482.25   56.29 
  -5   5  -1  430.66   48.50 
   5   5   1  366.96   46.60 
  -5   5  -1  476.45   58.09 
   5   5   1  326.37   56.49 
  -5   5  -1  548.95   80.19 
   5   5   1  427.86   59.59 
   5   5   1  444.06   55.19 
   5   5   1  481.25   64.49 
   5   5   1  451.65   62.49 
  -5   5  -1  375.06   49.60 
   5   5   1  440.96   61.49 
  -5   5  -1  462.35   52.79 
  -5   5  -1  355.16   55.49 
  -5   5  -1  388.76   30.40 
   6  -5   1    8.20   14.00 
  -6  -5  -1    1.30   18.10 
   6  -5   1    2.20   13.70 
  -6  -5  -1    7.10   13.70 
  -6  -5  -1   -0.10   12.50 
  -6  -5  -1   -2.70   18.20 
   6  -5   1    1.10   13.80 
  -6  -5  -1   -4.40   19.70 
   6  -5   1   -1.40   13.60 
  -6  -5  -1    1.00   13.20 
  -6  -5  -1   -7.40   17.60 
  -6  -5  -1   -3.40   15.90 
  -6  -5  -1   20.90   21.30 
   6  -5   1    7.00   11.90 
   6  -5   1   -0.60   13.90 
  -6  -5  -1  -13.80   16.10 
   6   5   1    3.50   14.00 
   6   5   1    2.60   17.10 
  -6   5  -1    9.90   22.00 
   6   5   1    7.70   17.60 
  -6   5  -1  -18.30   11.90 
   6   5   1   -3.40   14.50 
  -6   5  -1   13.20   15.70 
   6   5   1   14.40   20.40 
  -6   5  -1   -3.60   14.60 
   6   5   1    3.10   13.10 
   6   5   1   -1.20   13.10 
  -6   5  -1   -3.70   14.30 
   6   5   1   -9.20   13.50 
   6   5   1   -3.30   14.40 
  -6   5  -1    5.80   15.20 
   6   5   1   -0.10   14.00 
  -6   5  -1   18.20   18.90 
   6   5   1    4.20   16.20 
  -6   5  -1  -13.10   12.30 
  -6   5  -1    6.30   17.80 
  -6   5  -1   -0.60   11.60 
  -6   5  -1  -15.20    9.70 
   6   5   1   -3.40   15.10 
   6   5   1  -12.70   10.20 
  -6   5  -1   20.20   16.20 
   6   5   1   -2.90   11.00 
   6   5   1    1.20   14.10 
  -7  -5  -1    4.70   20.90 
  -7  -5  -1   38.50   25.90 
  -7  -5  -1   43.20   22.00 
  -7  -5  -1   64.19   30.00 
   7  -5   1   16.80   22.40 
  -7  -5  -1   87.69   38.10 
  -7  -5  -1   34.50   26.20 
   7  -5   1   37.90   24.10 
   7  -5   1   28.60   21.50 
  -7  -5  -1   61.29   29.90 
  -7  -5  -1   41.90   22.50 
  -7  -5  -1   26.60   27.80 
  -7  -5  -1   18.30   26.40 
   7  -5   1   12.60   18.50 
  -7  -5  -1   34.90   28.20 
   7   5   1   30.60   21.70 
  -7   5  -1   36.90   21.60 
  -7   5  -1   32.80   23.10 
  -7   5  -1   35.50   21.10 
   7   5   1   19.80   23.00 
  -7   5  -1   16.70   22.30 
   7   5   1    4.20   17.80 
  -7   5  -1   26.90   21.30 
  -7   5  -1    6.80   20.20 
  -7   5  -1   39.90   21.40 
  -7   5  -1   12.40   20.50 
   7   5   1   20.00   24.00 
  -7   5  -1   58.49   26.50 
   7   5   1    5.90   20.70 
   7   5   1   35.30   23.00 
  -7   5  -1   40.00   20.70 
   7   5   1   12.50   20.70 
  -7   5  -1   24.20   28.50 
  -7   5  -1   49.80   27.90 
   7   5   1   42.00   28.00 
   7   5   1   14.50   17.50 
   7   5   1   48.50   24.60 
  -7   5  -1   40.10   27.60 
  -7   5  -1    4.80   18.50 
   7   5   1    7.70   18.40 
   7   5   1   51.79   23.80 
  -8  -5  -1   63.79   28.80 
  -8  -5  -1   90.79   36.90 
   8  -5   1   89.79   36.10 
  -8  -5  -1   74.39   42.30 
   8  -5   1   12.70   25.50 
  -8  -5  -1   99.49   43.80 
  -8  -5  -1   69.49   36.30 
  -8  -5  -1   82.79   35.30 
  -8  -5  -1   42.70   28.50 
  -8  -5  -1   62.69   33.10 
  -8  -5  -1   20.90   26.10 
   8  -5   1   64.29   32.00 
  -8  -5  -1   40.90   25.60 
  -8  -5  -1   52.39   32.00 
  -8  -5  -1   24.30   25.60 
   8   5   1   97.39   42.70 
   8   5   1   55.09   30.40 
  -8   5  -1   31.80   24.50 
  -8   5  -1  106.29   44.10 
  -8   5  -1   21.50   27.30 
   8   5   1   40.50   29.60 
  -8   5  -1   18.00   22.20 
   8   5   1   74.99   36.50 
   8   5   1   42.70   28.30 
  -8   5  -1   46.10   31.20 
   8   5   1   62.49   31.60 
   8   5   1   98.99   37.50 
   8   5   1   71.79   35.10 
  -8   5  -1   40.30   33.30 
  -8   5  -1   23.10   25.70 
   8   5   1  100.99   40.50 
  -8   5  -1   67.19   30.60 
  -8   5  -1   57.19   28.40 
  -8   5  -1   58.29   29.50 
   8   5   1   46.40   30.00 
  -8   5  -1   37.60   23.60 
   8   5   1   77.29   34.80 
  -8  -6   1  780.82  106.49 
  -8  -6   1  587.14   90.99 
  -8  -6   1  671.93   78.99 
  -8  -6   1  537.25   98.79 
  -8  -6   1  722.23  105.39 
  -8  -6   1  676.43   98.49 
  -8  -6   1  671.33   94.29 
  -8  -6   1  841.92  103.69 
  -8  -6   1  794.32   90.29 
  -8  -6   1  589.84  107.69 
  -8  -6   1  890.01  104.49 
   8   6  -1  576.04   89.19 
   8   6  -1  693.13   95.99 
  -8   6   1  714.73   81.09 
  -8   6   1  724.33   83.29 
  -8   6   1  723.03   97.09 
  -8   6   1  661.53   93.99 
   8   6  -1  923.01  110.89 
   8   6  -1  703.83   98.19 
   8   6  -1  618.64   91.09 
   8   6  -1  692.93   96.99 
  -8   6   1  746.33   96.39 
   8   6  -1  624.84   87.39 
   8   6  -1  832.32  113.09 
   8   6  -1  702.63  136.29 
  -8   6   1  850.31  110.79 
  -8   6   1  727.93   93.49 
  -8   6   1  689.53   88.69 
   8   6  -1  514.95   79.39 
   8   6  -1  612.54   92.89 
   7  -6  -1  132.29   36.30 
  -7  -6   1   59.09   32.00 
  -7  -6   1  120.59   41.50 
  -7  -6   1  114.39   37.00 
  -7  -6   1  121.39   47.60 
  -7  -6   1  129.89   43.30 
  -7  -6   1   54.89   24.10 
  -7  -6   1  127.39   41.30 
  -7  -6   1  122.39   45.00 
  -7  -6   1   77.19   28.80 
  -7  -6   1   61.89   28.60 
  -7  -6   1   94.39   41.70 
  -7   6   1  142.89   42.80 
  -7   6   1   87.69   35.30 
   7   6  -1   54.79   28.20 
   7   6  -1   95.39   37.30 
  -7   6   1  158.28   57.79 
   7   6  -1  160.78   44.20 
  -7   6   1  181.58   50.89 
  -7   6   1   95.99   37.90 
  -7   6   1  103.29   34.10 
   7   6  -1  113.39   39.90 
   7   6  -1   80.29   32.20 
  -7   6   1  126.89   30.10 
   7   6  -1   83.79   35.40 
   7   6  -1   72.29   33.30 
  -7   6   1  159.88   41.00 
   7   6  -1  112.09   33.70 
   7   6  -1  104.29   37.10 
   7   6  -1  129.79   37.90 
   7   6  -1  125.49   42.60 
   7   6  -1  110.99   42.20 
  -7   6   1  157.38   35.90 
  -7   6   1  147.99   40.20 
  -6  -6   1  786.62  102.99 
  -6  -6   1  882.01   66.29 
  -6  -6   1  843.92   91.19 
  -6  -6   1  938.11  104.29 
  -6  -6   1 1138.49   94.59 
  -6  -6   1 1026.10  106.29 
  -6  -6   1  871.21   80.79 
   6  -6  -1  866.31   69.39 
  -6  -6   1  852.81   94.69 
  -6  -6   1 1052.59   76.59 
  -6  -6   1  784.22  105.09 
  -6  -6   1  858.41   95.19 
   6  -6  -1  886.31   73.09 
  -6  -6   1  961.00  106.39 
   6  -6  -1 1140.39   75.79 
   6   6  -1  927.01   76.79 
  -6   6   1  958.90   91.49 
  -6   6   1  954.40   95.09 
  -6   6   1  950.40   63.39 
  -6   6   1  767.72   89.69 
   6   6  -1  864.51   91.99 
   6   6  -1  760.22   94.79 
   6   6  -1  748.63   91.19 
   6   6  -1 1125.19  117.59 
   6   6  -1  894.91   98.89 
  -6   6   1  821.62   89.29 
   6   6  -1  784.22   87.89 
  -6   6   1  859.51   71.49 
  -6   6   1  776.22   78.19 
   6   6  -1  848.12   92.59 
   6   6  -1  922.81   99.59 
  -6   6   1  881.51   65.69 
  -6   6   1  943.71   69.79 
   6   6  -1  836.62   87.49 
   6   6  -1 1069.19  107.69 
  -6   6   1  943.81  105.39 
   6   6  -1  811.92   92.59 
  -6   6   1  943.51  106.39 
   6   6  -1  868.01   71.29 
   6   6  -1  941.21   68.99 
  -5  -6   1  456.15   77.19 
  -5  -6   1  397.66   50.69 
   5  -6  -1  385.06   52.99 
   5  -6  -1  347.07   49.40 
   5  -6  -1  432.46   56.99 
   5  -6  -1  328.07   46.60 
   5  -6  -1  314.37   47.60 
  -5  -6   1  310.37   53.69 
  -5  -6   1  283.67   52.39 
  -5  -6   1  335.47   56.69 
  -5  -6   1  362.96   56.89 
  -5  -6   1  449.76   75.09 
   5  -6  -1  391.26   52.59 
  -5  -6   1  352.86   43.90 
  -5  -6   1  341.47   58.89 
  -5  -6   1  427.76   65.09 
  -5  -6   1  287.17   52.49 
  -5  -6   1  384.46   53.79 
   5  -6  -1  312.37   44.60 
   5   6  -1  321.07   51.49 
   5   6  -1  413.66   62.89 
  -5   6   1  379.16   52.39 
   5   6  -1  365.96   60.29 
   5   6  -1  273.47   43.90 
  -5   6   1  312.37   57.19 
  -5   6   1  376.16   52.39 
   5   6  -1  451.85   68.99 
  -5   6   1  471.55   60.09 
   5   6  -1  354.26   47.40 
  -5   6   1  424.46   44.60 
   5   6  -1  248.68   40.70 
  -5   6   1  313.57   40.50 
  -5   6   1  288.67   39.10 
   5   6  -1  317.37   47.80 
  -5   6   1  316.27   56.99 
  -5   6   1  408.06   61.09 
  -5   6   1  351.16   44.90 
   5   6  -1  399.16   67.09 
   5   6  -1  457.55   64.49 
   5   6  -1  298.07   52.49 
  -5   6   1  442.36   59.09 
   5   6  -1  262.47   51.59 
  -5   6   1  385.56   61.29 
   5   6  -1  339.07   57.59 
  -4  -6   1  855.31   88.99 
  -4  -6   1  694.63   78.99 
  -4  -6   1  774.42   47.90 
  -4  -6   1  623.94   71.09 
   4  -6  -1  712.13   55.69 
  -4  -6   1  607.84   72.89 
  -4  -6   1  607.94   85.49 
  -4  -6   1  668.83   75.29 
   4  -6  -1  776.32   82.19 
   4  -6  -1  572.44   68.89 
   4  -6  -1  696.23   74.69 
   4  -6  -1  640.14   50.49 
  -4  -6   1  714.13   83.19 
  -4  -6   1  723.23   86.79 
   4  -6  -1  721.93   53.89 
  -4  -6   1  597.94   72.79 
  -4  -6   1  635.74   69.99 
   4  -6  -1  683.83   70.59 
   4   6  -1  757.22   75.79 
  -4   6   1  696.33   72.79 
   4   6  -1  718.63   51.59 
  -4   6   1  765.22   53.69 
   4   6  -1  693.73   56.59 
   4   6  -1  663.53   71.09 
  -4   6   1  682.53   79.59 
  -4   6   1  696.93   51.49 
   4   6  -1  697.13   74.89 
   4   6  -1  654.23   54.89 
   4   6  -1  684.43   84.29 
   4   6  -1  637.04   71.39 
   4   6  -1  825.02   90.19 
   4   6  -1  835.72   89.19 
  -4   6   1  729.13   52.89 
  -4   6   1  780.62   58.19 
  -4   6   1  681.83   79.79 
   4   6  -1  639.24   76.09 
  -4   6   1  607.24   52.49 
   4   6  -1  615.34   72.09 
   4   6  -1  748.03   73.19 
   4   6  -1  655.53   49.20 
  -4   6   1  764.12   77.49 
  -4   6   1  735.63   47.60 
  -4   6   1  645.34   68.39 
  -4   6   1  717.33   44.30 
  -3  -6   1    0.20   14.30 
   3  -6  -1    4.60   17.30 
  -3  -6   1   13.40   15.80 
  -3  -6   1    2.40   16.50 
  -3  -6   1    6.10    7.70 
  -3  -6   1   11.30   15.70 
   3  -6  -1   13.60   13.40 
   3  -6  -1   11.90   12.90 
  -3  -6   1   -9.40   10.70 
   3  -6  -1   20.00   14.10 
  -3  -6   1    6.90   13.40 
   3  -6  -1   18.10   16.40 
  -3  -6   1   27.90   16.90 
   3  -6  -1    8.90   23.20 
   3  -6  -1   17.10   12.50 
  -3  -6   1    7.70   16.70 
  -3  -6   1   -4.70   13.70 
  -3  -6   1    9.80   15.30 
   3   6  -1   12.20    9.50 
  -3   6   1   20.40   14.50 
   3   6  -1   20.80   15.50 
   3   6  -1   18.30   18.80 
   3   6  -1   32.50   14.40 
   3   6  -1   14.90   14.50 
   3   6  -1   13.90   14.20 
  -3   6   1    6.30   13.10 
   3   6  -1    0.20   13.50 
   3   6  -1    6.80   13.00 
  -3   6   1   25.50   15.70 
  -3   6   1   17.80    9.00 
  -3   6   1   13.30    6.80 
   3   6  -1    6.50   10.60 
   3   6  -1    7.90   14.80 
  -3   6   1    9.80   11.60 
   3   6  -1    4.30   10.70 
   3   6  -1   21.70   15.10 
   3   6  -1   23.90   18.20 
  -3   6   1    8.70   10.90 
  -3   6   1   10.50   16.20 
  -3   6   1    2.70    8.20 
  -3   6   1    1.20   16.30 
  -3   6   1   -7.00    9.50 
   3   6  -1   14.10   15.60 
  -3   6   1    0.30   12.30 
  -2  -6   1    7.30   14.30 
  -2  -6   1   -1.90   11.20 
  -2  -6   1    2.80   17.40 
   2  -6  -1    0.00   10.90 
   2  -6  -1    7.70   18.20 
  -2  -6   1   -6.10    9.70 
  -2  -6   1  -13.20    8.90 
   2  -6  -1   -1.60   13.80 
   2  -6  -1   -1.10   10.80 
  -2  -6   1   -3.20   12.30 
  -2  -6   1    9.10   11.30 
  -2  -6   1   27.80   20.10 
   2  -6  -1   -8.00   11.10 
  -2  -6   1   -5.60   16.50 
   2  -6  -1   -4.30    7.70 
   2  -6  -1   16.10   13.50 
  -2  -6   1   -5.90    8.90 
   2  -6  -1    7.60   11.80 
   2  -6  -1  -11.70   10.30 
  -2   6   1   10.50   12.10 
  -2   6   1    8.40   10.60 
   2   6  -1    4.00   10.90 
   2   6  -1   23.30   15.00 
  -2   6   1   11.40   11.10 
   2   6  -1   -2.20    8.60 
   2   6  -1   20.40   14.70 
   2   6  -1    5.00   10.80 
  -2   6   1   10.30   10.20 
   2   6  -1   16.20   11.40 
   2   6  -1   -8.40    9.00 
   2   6  -1    7.20   11.50 
   2   6  -1    2.30   10.50 
   2   6  -1   16.10   16.60 
  -2   6   1    8.70   14.50 
  -2   6   1   42.30   20.30 
  -2   6   1   -3.50   10.30 
  -2   6   1    8.00    6.90 
   2   6  -1    5.90    6.20 
   2   6  -1    5.40   13.60 
  -2   6   1    6.30    7.10 
   2   6  -1   -6.30    9.70 
   2   6  -1   -2.20   12.40 
  -2   6   1   50.79   22.50 
  -2   6   1   19.60   12.80 
  -2   6   1    6.50    7.30 
   2   6  -1    6.10   11.90 
   1  -6  -1   20.80   15.70 
   1  -6  -1   30.00   21.30 
   1  -6  -1   22.30   19.90 
   1  -6  -1   16.80   15.10 
   1  -6  -1    5.20   13.60 
   1  -6  -1   -1.10   11.00 
  -1  -6   1    6.80   21.40 
   1  -6  -1   38.80   17.10 
   1  -6  -1   29.20   13.30 
   1  -6  -1   63.19   25.30 
  -1  -6   1   24.40   15.40 
  -1  -6   1   14.50   14.30 
  -1  -6   1   33.80   10.60 
   1  -6  -1   37.10   29.40 
  -1  -6   1   13.70   12.30 
  -1  -6   1    4.80   14.60 
  -1  -6   1   54.29   16.30 
  -1  -6   1   14.40   21.00 
  -1  -6   1   32.40   23.90 
  -1  -6   1   20.30   16.60 
   1  -6  -1   45.30   22.90 
  -1  -6   1    5.90   15.30 
   1  -6  -1   30.90   19.10 
  -1  -6   1  -11.70   18.30 
   1  -6  -1   17.00   10.80 
  -1  -6   1    9.80   13.90 
  -1  -6   1   14.30   15.10 
   1  -6  -1   14.60    9.00 
  -1  -6   1   54.79   27.40 
  -1   6   1   60.79   23.10 
  -1   6   1   12.80   13.20 
   1   6  -1   16.90   12.90 
  -1   6   1   30.30   18.50 
   1   6  -1   21.10   14.20 
   1   6  -1   32.80   16.50 
  -1   6   1   29.40   15.80 
   1   6  -1   27.70   13.90 
  -1   6   1   19.70   15.50 
   1   6  -1   27.60   14.00 
   1   6  -1   17.10   14.30 
  -1   6   1   31.10   18.00 
   1   6  -1   25.00   17.10 
  -1   6   1   11.20    8.00 
   1   6  -1   18.20   15.70 
  -1   6   1   24.90    6.40 
   1   6  -1   38.50   17.80 
  -1   6   1   30.10    9.00 
   1   6  -1   12.40    8.50 
   1   6  -1   40.50   10.40 
  -1   6   1   15.50    8.00 
  -1   6   1   20.70   14.20 
  -1   6   1   20.10   11.20 
  -1   6   1   54.29   18.30 
   1   6  -1   26.50   14.90 
   1   6  -1   28.20   19.00 
  -1   6   1   16.00   10.80 
  -1   6   1   34.40   13.00 
  -1   6   1   26.00   16.90 
  -1   6   1   34.90   13.70 
   1   6  -1   34.80   16.70 
   1   6  -1   20.00   10.40 
   1   6  -1   19.60   14.90 
   1   6  -1   15.20   13.70 
   1   6  -1   20.20   16.70 
   0  -6  -1  765.32   77.19 
   0  -6   1  631.44   27.30 
   0  -6  -1  672.93   75.39 
   0  -6  -1  560.24   66.19 
   0  -6   1  655.33   69.29 
   0  -6   1  693.13   85.69 
   0  -6   1  653.83   80.59 
   0  -6  -1  612.24   61.49 
   0  -6   1  656.63   32.30 
   0  -6  -1  699.73   57.89 
   0  -6   1  555.04   58.39 
   0  -6  -1  614.54   84.59 
   0  -6   1  648.24   69.09 
   0  -6   1  577.44   65.79 
   0  -6  -1  632.74   47.60 
   0  -6  -1  655.23   68.29 
   0  -6   1  730.73   84.49 
   0  -6   1  599.04   83.09 
   0  -6  -1  682.63   83.99 
   0  -6  -1  589.14   61.99 
   0  -6   1  479.25   81.49 
   0  -6   1  628.84   61.99 
   0  -6  -1  652.83   41.80 
   0  -6   1  603.04   32.60 
   0  -6  -1  687.53   53.39 
   0  -6  -1  581.04   63.09 
   0  -6   1  697.63   46.40 
   0  -6   1  590.34   51.79 
   0  -6  -1  561.74   93.89 
   0  -6  -1  675.23   71.99 
   0  -6   1  528.35   61.39 
   0  -6   1  621.64   70.29 
   0   6   1  639.24   42.80 
   0   6   1  654.83   53.79 
   0   6  -1  561.44   41.70 
   0   6  -1  651.03   48.20 
   0   6  -1  599.64   66.29 
   0   6  -1  614.44   40.40 
   0   6  -1  622.34   49.50 
   0   6  -1  696.43   55.99 
   0   6  -1  741.53   57.09 
   0   6   1  574.14   58.49 
   0   6  -1  501.95   42.10 
   0   6  -1  594.44   49.70 
   0   6   1  562.14   49.40 
   0   6  -1  687.53   57.29 
   0   6   1  610.64   48.30 
   0   6   1  612.24   62.59 
   0   6   1  561.64   43.60 
   0   6  -1  659.33   33.30 
   0   6   1  661.23   33.00 
   0   6  -1  626.84   48.80 
   0   6   1  610.54   45.50 
   0   6   1  576.94   44.90 
   0   6   1  620.44   65.19 
   0   6   1  667.13   56.49 
   0   6   1  616.04   42.40 
   0   6   1  710.63   54.49 
   0   6   1  750.12   60.59 
   0   6  -1  612.14   53.19 
   0   6  -1  555.64   39.40 
   0   6   1  633.34   43.10 
   0   6  -1  636.84   51.59 
   0   6  -1  650.03   49.50 
   0   6  -1  632.44   34.00 
   1  -6   1   39.40   16.70 
  -1  -6  -1   67.09   36.30 
   1  -6   1   65.59   23.80 
   1  -6   1   86.09   18.20 
  -1  -6  -1  140.49   36.00 
  -1  -6  -1   18.50   14.60 
   1  -6   1   74.29   25.70 
   1  -6   1   74.39   22.20 
  -1  -6  -1   16.60   13.20 
   1  -6   1   77.19   33.30 
  -1  -6  -1   46.30   21.40 
  -1  -6  -1   54.39   20.80 
   1  -6   1   68.39   13.20 
   1  -6   1   47.70   12.80 
   1  -6   1   52.89   22.90 
  -1  -6  -1   73.49   22.10 
  -1  -6  -1   49.99   21.40 
  -1  -6  -1   65.89   25.40 
  -1  -6  -1   64.49   21.50 
   1  -6   1   57.99   22.70 
  -1  -6  -1   59.89   30.30 
  -1  -6  -1   49.90   18.80 
  -1  -6  -1   63.39   35.50 
   1   6   1  120.59   30.70 
  -1   6  -1   59.59   16.30 
   1   6   1   55.79   20.30 
   1   6   1   60.59   19.40 
  -1   6  -1   35.60   19.70 
   1   6   1   50.79   23.20 
   1   6   1   29.00   18.60 
  -1   6  -1   62.29   19.00 
  -1   6  -1   61.39   21.70 
  -1   6  -1   61.09   16.20 
  -1   6  -1   64.59   20.20 
   1   6   1   40.30   18.40 
   1   6   1   60.19   22.30 
  -1   6  -1   66.29   13.50 
   1   6   1   56.59   21.70 
  -1   6  -1   49.00   18.10 
  -1   6  -1   74.09   20.80 
   1   6   1   50.69   19.20 
  -1   6  -1   55.49   20.80 
   1   6   1   48.20   12.00 
   1   6   1   75.99   24.60 
   1   6   1   38.80   18.20 
  -1   6  -1   33.60   14.30 
   1   6   1   73.49   20.40 
   1   6   1   52.29   17.30 
  -1   6  -1   50.39   18.40 
  -1   6  -1   60.19   22.70 
   1   6   1   62.19   11.00 
  -1   6  -1   77.79   23.00 
   1   6   1   53.19   16.70 
  -1   6  -1   74.49   19.20 
  -2  -6  -1  972.50   53.79 
  -2  -6  -1  856.51   70.69 
   2  -6   1  907.31   54.89 
  -2  -6  -1 1078.19  122.49 
  -2  -6  -1 1145.19   84.79 
  -2  -6  -1 1045.60   74.49 
  -2  -6  -1  868.41   67.19 
  -2  -6  -1  818.92  101.09 
  -2  -6  -1  922.11   66.19 
   2  -6   1  990.90   64.99 
   2  -6   1  938.61   73.19 
   2  -6   1  944.01   79.79 
   2  -6   1 1031.50   76.09 
   2  -6   1  930.41   49.20 
   2  -6   1 1050.49   80.89 
  -2  -6  -1  956.10   40.20 
  -2  -6  -1  948.31   69.79 
  -2  -6  -1  941.41   65.49 
  -2  -6  -1  885.91   71.29 
   2   6   1  991.40   71.69 
  -2   6  -1  913.21   59.19 
   2   6   1  960.50   49.30 
   2   6   1  888.41   63.09 
   2   6   1  883.81   67.89 
  -2   6  -1  985.40   61.99 
   2   6   1  968.90   74.99 
  -2   6  -1  978.40   40.20 
  -2   6  -1  927.11   64.69 
   2   6   1  975.80   68.39 
   2   6   1  958.60   65.29 
   2   6   1  939.91   72.89 
  -2   6  -1  930.91   58.49 
  -2   6  -1  962.70   66.09 
  -2   6  -1 1065.09   69.59 
  -2   6  -1 1047.20   72.89 
  -2   6  -1  935.31   52.59 
  -2   6  -1 1023.70   61.49 
   2   6   1 1065.59   71.39 
   2   6   1  960.70   60.99 
  -2   6  -1  908.41   40.00 
   2   6   1  920.31   74.09 
   2   6   1  916.21   71.29 
  -2   6  -1  982.50   61.89 
   2   6   1  985.50   62.39 
   2   6   1  922.21   52.09 
   2   6   1  942.81   63.69 
  -2   6  -1  919.01   69.69 
  -2   6  -1  956.00   72.99 
   3  -6   1  379.36   40.00 
  -3  -6  -1  277.07   28.20 
   3  -6   1  295.57   53.49 
  -3  -6  -1  171.18   39.40 
  -3  -6  -1  257.37   42.60 
  -3  -6  -1  260.77   56.29 
  -3  -6  -1  275.47   45.00 
  -3  -6  -1  347.27   66.19 
   3  -6   1  230.88   41.60 
  -3  -6  -1  257.07   46.60 
   3  -6   1  325.87   66.09 
  -3  -6  -1  348.07   52.29 
  -3  -6  -1  277.37   45.10 
  -3  -6  -1  335.07   50.09 
   3  -6   1  235.48   43.00 
   3  -6   1  250.77   40.80 
   3  -6   1  262.87   34.60 
   3   6   1  294.17   35.00 
   3   6   1  243.18   46.30 
  -3   6  -1  284.57   35.10 
   3   6   1  272.37   50.89 
  -3   6  -1  302.27   47.70 
  -3   6  -1  264.97   29.10 
   3   6   1  275.97   51.89 
   3   6   1  252.57   33.80 
  -3   6  -1  277.07   48.50 
  -3   6  -1  312.57   38.80 
   3   6   1  251.07   45.10 
   3   6   1  237.98   41.70 
  -3   6  -1  236.08   32.50 
  -3   6  -1  246.78   42.10 
   3   6   1  312.17   44.00 
   3   6   1  284.67   36.60 
   3   6   1  284.47   32.30 
   3   6   1  216.38   38.30 
   3   6   1  200.68   37.70 
  -3   6  -1  337.27   46.90 
  -3   6  -1  295.57   48.40 
   3   6   1  270.57   42.90 
   3   6   1  278.77   43.20 
  -3   6  -1  286.77   42.00 
  -3   6  -1  296.97   28.80 
  -3   6  -1  332.27   42.40 
   4  -6   1  730.03   61.49 
   4  -6   1  834.62   57.69 
  -4  -6  -1  734.43   78.29 
  -4  -6  -1  858.31   77.39 
  -4  -6  -1  825.92  102.59 
   4  -6   1  932.31   61.79 
   4  -6   1  799.32   53.99 
   4  -6   1  823.82   64.49 
  -4  -6  -1  638.44   75.29 
  -4  -6  -1  906.31   53.69 
  -4  -6  -1  813.32   54.69 
  -4  -6  -1  906.31   73.49 
  -4  -6  -1  654.43   77.79 
  -4  -6  -1  765.22   98.09 
   4  -6   1  858.71   70.09 
  -4  -6  -1  788.02   89.29 
   4  -6   1  805.42   95.09 
  -4  -6  -1  974.70   73.99 
  -4  -6  -1  842.82   69.39 
  -4   6  -1  808.82   67.09 
   4   6   1  850.51   60.19 
  -4   6  -1  869.41   66.29 
   4   6   1  827.62   58.39 
   4   6   1 1002.70   72.99 
   4   6   1  718.63   75.59 
  -4   6  -1  778.82   55.69 
  -4   6  -1  848.82   82.39 
  -4   6  -1  867.11   92.69 
   4   6   1  769.72   62.89 
   4   6   1  856.11   88.09 
  -4   6  -1  875.21   57.19 
   4   6   1  780.22   81.49 
  -4   6  -1  770.32   49.40 
  -4   6  -1  882.41   57.69 
   4   6   1  794.52   90.49 
  -4   6  -1  922.51   65.89 
  -4   6  -1  868.51   50.89 
  -4   6  -1  823.02   68.49 
   4   6   1  786.02   84.79 
  -4   6  -1  762.42   49.50 
   4   6   1  871.61   67.09 
   4   6   1  800.22   85.19 
  -4   6  -1  917.71   78.19 
  -5  -6  -1  772.22   85.39 
  -5  -6  -1  831.42  107.09 
  -5  -6  -1  765.52   82.09 
  -5  -6  -1  820.72   90.59 
   5  -6   1  813.72   82.39 
  -5  -6  -1  808.12  103.39 
  -5  -6  -1  810.42   90.99 
   5  -6   1  822.02   68.89 
  -5  -6  -1  589.74   82.09 
   5  -6   1  797.62   62.89 
   5  -6   1  725.03   83.79 
  -5  -6  -1  685.43   87.09 
   5  -6   1  831.42   58.49 
  -5  -6  -1  760.52   55.39 
  -5  -6  -1  761.72   88.79 
   5  -6   1  778.72   81.09 
  -5  -6  -1  736.63   56.99 
   5   6   1  816.62   64.29 
   5   6   1  732.63   85.49 
   5   6   1  778.72   86.09 
   5   6   1  785.12   63.29 
   5   6   1  814.12   89.09 
  -5   6  -1  779.82   77.39 
   5   6   1  856.81   71.69 
  -5   6  -1  785.92   96.09 
   5   6   1  721.33   88.29 
  -5   6  -1  792.92   86.99 
   5   6   1  750.62   59.59 
   5   6   1  706.43   82.99 
  -5   6  -1  731.83   59.09 
   5   6   1  796.62   84.19 
  -5   6  -1  810.62   60.89 
  -5   6  -1  783.62   55.69 
  -5   6  -1  767.02   75.49 
   5   6   1  908.21   67.19 
  -5   6  -1  800.72   64.29 
  -5   6  -1  646.04   74.49 
  -5   6  -1  827.52   62.29 
   5   6   1  769.42   84.49 
  -5   6  -1  799.12   89.39 
   5   6   1  774.62   94.09 
   5   6   1  879.91   91.59 
  -6  -6  -1 1144.49  128.09 
  -6  -6  -1 1064.19   96.79 
  -6  -6  -1 1090.49   94.29 
   6  -6   1  995.40   78.39 
  -6  -6  -1 1175.28  114.59 
   6  -6   1 1136.59  131.19 
   6  -6   1 1016.90   83.19 
  -6  -6  -1 1048.50   88.39 
   6  -6   1 1078.89   85.79 
  -6  -6  -1 1166.18   77.09 
  -6  -6  -1  857.21   97.09 
   6  -6   1  885.31   74.49 
  -6  -6  -1 1000.80  123.79 
  -6  -6  -1 1134.19  113.19 
  -6  -6  -1  908.11   96.89 
  -6  -6  -1 1053.29   72.49 
   6  -6   1 1029.30   79.39 
   6   6   1 1141.69   95.19 
  -6   6  -1 1057.19   88.09 
   6   6   1 1196.38  123.09 
  -6   6  -1  942.41  103.49 
   6   6   1  793.72   91.29 
  -6   6  -1 1053.29   80.79 
   6   6   1  937.21   77.29 
  -6   6  -1  893.31   74.39 
  -6   6  -1 1212.78   84.39 
  -6   6  -1  963.40   74.59 
   6   6   1 1069.99   87.49 
   6   6   1 1148.89   89.29 
   6   6   1 1029.70   86.79 
   6   6   1 1129.69   88.19 
   6   6   1  977.30  110.09 
   6   6   1 1031.40   73.09 
  -6   6  -1  918.91   70.79 
  -6   6  -1  949.11   75.99 
   6   6   1  914.01  102.19 
  -6   6  -1 1007.40  119.19 
   6   6   1 1051.39  108.59 
   6   6   1 1002.60   78.69 
   6   6   1  827.42   93.39 
  -6   6  -1  985.30   70.19 
   7  -6   1  370.66   61.49 
  -7  -6  -1  474.85   71.79 
  -7  -6  -1  380.66   68.19 
  -7  -6  -1  399.06   68.19 
   7  -6   1  383.36   66.49 
  -7  -6  -1  548.65   81.19 
  -7  -6  -1  379.46   74.89 
  -7  -6  -1  360.26   53.79 
  -7  -6  -1  471.85   62.19 
  -7  -6  -1  424.86   82.49 
   7  -6   1  499.35   78.69 
  -7  -6  -1  420.56   68.79 
  -7  -6  -1  388.46   68.59 
  -7  -6  -1  461.55   73.89 
  -7  -6  -1  410.96   84.69 
  -7   6  -1  429.86   74.59 
  -7   6  -1  449.36   66.69 
  -7   6  -1  346.37   65.19 
  -7   6  -1  629.84   72.49 
   7   6   1  441.46   82.59 
   7   6   1  390.16   69.19 
   7   6   1  341.07   64.59 
   7   6   1  473.15   70.39 
   7   6   1  427.36   67.59 
  -7   6  -1  462.45   71.89 
   7   6   1  415.76   62.39 
  -7   6  -1  483.45   61.99 
  -7   6  -1  342.77   58.19 
   7   6   1  445.36   75.09 
   7   6   1  476.45   77.49 
   7   6   1  407.66   63.79 
   7   6   1  405.06   72.99 
   7   6   1  403.46   70.39 
  -7   6  -1  342.57   74.99 
  -7   6  -1  435.96   96.89 
   7   6   1  406.86   68.29 
  -8  -6  -1 1100.19  116.79 
  -8  -6  -1  992.70  140.09 
   8  -6   1 1289.97  161.58 
  -8  -6  -1  969.30  113.39 
  -8  -6  -1 1260.77  128.99 
  -8  -6  -1 1112.49  122.59 
  -8  -6  -1  860.41  119.19 
  -8  -6  -1 1101.39  104.79 
  -8  -6  -1 1201.68  131.89 
  -8  -6  -1 1356.96  159.38 
  -8  -6  -1 1064.49  119.99 
  -8  -6  -1 1244.98   94.19 
  -8  -6  -1 1342.57  138.89 
   8  -6   1 1142.99  103.69 
   8   6   1 1167.68  126.69 
   8   6   1 1197.28  132.09 
   8   6   1 1169.98  125.69 
  -8   6  -1 1210.58  126.29 
  -8   6  -1  995.30   98.79 
   8   6   1 1253.97  134.79 
   8   6   1 1233.48  100.79 
   8   6   1 1033.40  123.69 
  -8   6  -1 1269.57   91.29 
   8   6   1 1207.98  127.69 
  -8   6  -1  993.20  120.39 
   8   6   1 1347.87  140.49 
   8   6   1 1106.09  122.39 
   8   6   1  957.60  106.49 
  -8   6  -1 1082.59  118.19 
  -8   6  -1 1122.59  172.18 
  -7  -7   1  370.26   70.79 
  -7  -7   1  274.97   69.19 
  -7  -7   1  334.07   56.69 
  -7  -7   1  306.47   69.69 
  -7  -7   1  289.57   63.59 
  -7  -7   1  266.07   62.49 
  -7  -7   1  257.17   60.29 
  -7  -7   1  358.06   82.89 
  -7  -7   1  420.36   72.89 
  -7  -7   1  333.17   65.39 
   7   7  -1  329.67   67.49 
  -7   7   1  275.47   61.09 
   7   7  -1  313.27   67.79 
   7   7  -1  382.36   72.99 
   7   7  -1  305.17   60.99 
   7   7  -1  311.67   58.69 
   7   7  -1  431.56   79.79 
  -7   7   1  242.38   55.39 
   7   7  -1  265.77   61.59 
   7   7  -1  320.77   65.39 
   7   7  -1  329.37   64.49 
   7   7  -1  284.07   63.99 
   7   7  -1  249.68   55.19 
  -6  -7   1  623.34   88.99 
  -6  -7   1  595.84   99.99 
  -6  -7   1  434.16   82.39 
  -6  -7   1  455.95   63.99 
  -6  -7   1  517.75   79.29 
  -6  -7   1  634.44   86.29 
  -6  -7   1  335.07   60.89 
  -6  -7   1  532.45   81.89 
  -6  -7   1  603.04   82.69 
  -6  -7   1  360.16   63.19 
   6   7  -1  534.15   82.79 
  -6   7   1  632.94   86.99 
   6   7  -1  653.83   84.29 
   6   7  -1  587.34   78.39 
   6   7  -1  618.24   84.99 
   6   7  -1  495.35   76.09 
   6   7  -1  617.34   80.99 
  -6   7   1  620.74   76.29 
   6   7  -1  723.23   97.49 
  -6   7   1  610.74   89.89 
   6   7  -1  435.86   73.19 
   6   7  -1  519.65   85.19 
   6   7  -1  459.85   77.89 
   6   7  -1  540.25   71.39 
   6   7  -1  559.74   77.69 
  -6   7   1  562.54   74.19 
   6   7  -1  548.35   67.99 
  -5  -7   1 1130.59   87.69 
  -5  -7   1 1215.08  103.49 
  -5  -7   1 1219.58   95.59 
  -5  -7   1 1038.80  107.09 
   5  -7  -1  955.20   72.59 
  -5  -7   1  946.51  101.99 
  -5  -7   1  966.40  103.59 
  -5  -7   1  877.11  111.89 
  -5  -7   1 1115.59   89.69 
  -5  -7   1 1071.39  122.89 
   5  -7  -1 1044.40   86.19 
  -5  -7   1 1037.90   90.79 
   5   7  -1  909.01   75.19 
   5   7  -1 1191.08   81.59 
   5   7  -1 1066.39   91.99 
   5   7  -1 1168.18   91.79 
   5   7  -1  925.51  102.69 
   5   7  -1 1089.79   91.89 
   5   7  -1  939.11   78.09 
   5   7  -1  906.11   99.19 
   5   7  -1 1146.19   88.89 
   5   7  -1 1138.99   79.79 
  -5   7   1  985.00  110.39 
  -5   7   1 1104.79  112.89 
  -5   7   1 1081.89  102.79 
  -5   7   1 1096.49  111.09 
   5   7  -1 1048.80   86.09 
  -5   7   1 1153.18   84.69 
   5   7  -1  998.80  111.89 
   4  -7  -1 1352.56  101.29 
   4  -7  -1 1345.87  104.29 
  -4  -7   1 1382.06  103.19 
   4  -7  -1 1322.77   81.69 
   4  -7  -1 1299.77   97.29 
   4  -7  -1 1342.97   94.19 
  -4  -7   1 1568.94  103.99 
  -4  -7   1 1448.85  109.69 
  -4  -7   1 1305.47  115.59 
  -4  -7   1 1421.96  100.39 
  -4  -7   1 1275.37   98.79 
  -4  -7   1 1376.76  109.19 
  -4  -7   1 1438.36   99.19 
  -4  -7   1 1240.88   91.79 
   4   7  -1 1341.77  103.79 
  -4   7   1 1391.26  102.19 
  -4   7   1 1436.46  102.99 
   4   7  -1 1462.15   85.89 
   4   7  -1 1524.25  103.09 
  -4   7   1 1395.16  100.09 
   4   7  -1 1240.28   90.99 
  -4   7   1 1425.56   85.39 
   4   7  -1 1396.56  101.79 
   4   7  -1 1492.45  104.79 
   4   7  -1 1479.55  106.49 
  -4   7   1 1268.37   90.69 
  -4   7   1 1239.08   78.39 
   4   7  -1 1216.28   86.59 
  -4   7   1 1400.56   95.99 
   4   7  -1 1390.26   94.69 
  -4   7   1 1329.27  101.59 
   4   7  -1 1368.66   87.59 
   4   7  -1 1311.77   93.49 
  -4   7   1 1320.47   78.29 
   4   7  -1 1483.85   96.09 
  -3  -7   1  401.06   73.69 
   3  -7  -1  627.94   48.80 
   3  -7  -1  595.64   74.89 
  -3  -7   1  635.94   74.29 
  -3  -7   1  580.44   72.59 
  -3  -7   1  533.95   73.79 
  -3  -7   1  723.23   90.49 
  -3  -7   1  739.53   99.19 
   3  -7  -1  563.94   87.49 
  -3  -7   1  648.24   72.59 
   3  -7  -1  812.92   82.09 
  -3  -7   1  576.54   69.89 
  -3  -7   1  559.84   74.39 
   3  -7  -1  649.54   54.29 
  -3  -7   1  691.13   80.99 
   3  -7  -1  476.95   76.79 
  -3   7   1  658.43   58.09 
   3   7  -1  580.54   69.09 
   3   7  -1  644.34   72.49 
  -3   7   1  626.54   51.49 
  -3   7   1  555.94   61.59 
  -3   7   1  737.33   77.19 
   3   7  -1  729.23   82.49 
   3   7  -1  605.34   77.19 
   3   7  -1  748.43   79.49 
  -3   7   1  576.74   75.49 
   3   7  -1  537.25   73.49 
   3   7  -1  707.13   56.69 
  -3   7   1  749.23   79.49 
   3   7  -1  622.94   67.89 
  -3   7   1  600.44   72.39 
  -3   7   1  636.14   50.09 
  -3   7   1  708.63   53.59 
   3   7  -1  623.54   60.69 
   3   7  -1  653.23   72.49 
   3   7  -1  729.03   73.59 
   3   7  -1  669.33   79.89 
   3   7  -1  681.53   55.49 
  -2  -7   1  884.01   86.69 
  -2  -7   1  848.22  107.09 
   2  -7  -1  949.31   60.19 
  -2  -7   1  652.63   99.39 
   2  -7  -1  717.93   61.19 
  -2  -7   1  858.01   86.49 
  -2  -7   1  806.32   83.69 
  -2  -7   1  692.33   84.99 
  -2  -7   1 1072.29  114.89 
  -2  -7   1  849.61   83.99 
  -2  -7   1  643.24   75.99 
   2  -7  -1  822.32   49.70 
  -2  -7   1  794.62   83.09 
   2  -7  -1  794.22   88.19 
  -2  -7   1  837.82   64.79 
   2  -7  -1  963.20   99.19 
   2  -7  -1  827.72   99.39 
  -2  -7   1  791.62   87.19 
   2  -7  -1  719.73   78.69 
  -2   7   1  740.13   64.09 
   2   7  -1  785.12   82.59 
  -2   7   1  727.83   60.19 
   2   7  -1  784.92   63.39 
  -2   7   1  792.92   64.29 
  -2   7   1  820.72   46.70 
  -2   7   1  756.32   51.79 
   2   7  -1  717.33   58.19 
  -2   7   1  574.94   72.99 
  -2   7   1  882.91   68.89 
   2   7  -1  788.52   65.69 
   2   7  -1  853.81   57.69 
   2   7  -1  758.12   83.19 
   2   7  -1  904.11   72.69 
  -2   7   1  902.61   56.69 
   2   7  -1  591.44   75.39 
   2   7  -1  868.71   64.49 
  -2   7   1  748.63   58.99 
  -2   7   1  831.32   64.19 
   2   7  -1  751.02   80.59 
   2   7  -1  880.41   54.69 
   2   7  -1  730.53   76.89 
   2   7  -1  769.82   61.49 
   2   7  -1  842.02   84.49 
  -2   7   1  887.11   61.49 
  -2   7   1  942.51   74.49 
  -2   7   1  828.32   53.49 
  -1  -7   1  691.13   75.49 
   1  -7  -1  717.13   76.69 
   1  -7  -1  827.22   87.69 
   1  -7  -1  761.02   61.29 
   1  -7  -1  897.81   88.09 
  -1  -7   1  516.85   82.39 
   1  -7  -1  814.72   49.30 
  -1  -7   1  786.32   85.89 
  -1  -7   1  814.42  100.39 
  -1  -7   1  839.12   60.09 
  -1  -7   1  683.83   79.99 
  -1  -7   1  716.53   75.59 
  -1  -7   1  685.33   75.89 
   1  -7  -1  754.62   62.69 
  -1  -7   1  891.81   97.79 
  -1  -7   1  921.71   95.39 
   1  -7  -1  828.02   83.79 
   1  -7  -1  675.53   73.59 
   1  -7  -1  673.53   80.39 
  -1  -7   1  651.93  103.19 
   1  -7  -1  714.43   51.69 
   1  -7  -1  840.42   91.19 
  -1  -7   1  736.43   92.19 
  -1  -7   1  721.73   80.49 
   1   7  -1  745.83   62.29 
  -1   7   1  723.03   52.79 
   1   7  -1  855.31   65.89 
   1   7  -1  824.92   71.79 
   1   7  -1  574.94   68.99 
   1   7  -1  761.82   51.19 
   1   7  -1  860.61   87.39 
   1   7  -1  818.32   59.79 
  -1   7   1  858.61   69.59 
   1   7  -1  650.23   55.09 
  -1   7   1  814.82   65.99 
   1   7  -1  793.32   67.19 
  -1   7   1  727.53   58.89 
  -1   7   1  777.22   50.59 
   1   7  -1  662.23   72.29 
   1   7  -1  733.83   77.49 
  -1   7   1  738.23   77.89 
   1   7  -1  690.53   69.89 
   1   7  -1  836.72   62.19 
   1   7  -1  739.53   47.20 
  -1   7   1  805.52   64.19 
  -1   7   1  762.62   56.99 
  -1   7   1  728.43   64.59 
  -1   7   1  636.64   66.59 
  -1   7   1  765.32   50.29 
  -1   7   1  727.23   49.40 
  -1   7   1  811.62   61.19 
   0  -7  -1 1024.50   83.79 
   0  -7   1 1028.10   84.29 
   0  -7   1  921.11   75.59 
   0  -7   1 1148.49   71.59 
   0  -7   1  823.32   89.29 
   0  -7  -1 1045.40   84.09 
   0  -7  -1 1007.50   76.19 
   0  -7  -1  886.51   73.69 
   0  -7  -1 1019.60   66.49 
   0  -7   1  861.81   70.99 
   0  -7  -1  933.81   79.69 
   0  -7   1  989.70   85.29 
   0  -7  -1 1029.50   82.89 
   0  -7  -1  956.20  125.89 
   0  -7   1  872.21   71.79 
   0  -7   1  954.10   80.69 
   0  -7  -1  904.41   70.29 
   0  -7  -1 1039.10  115.89 
   0  -7   1 1071.19  115.89 
   0  -7   1 1236.98  139.19 
   0  -7  -1 1099.49   85.59 
   0  -7  -1 1058.79   80.19 
   0  -7   1 1183.58   97.29 
   0  -7  -1 1020.00   78.89 
   0  -7  -1 1000.40   67.99 
   0  -7   1  956.10   78.29 
   0  -7   1  970.70   62.29 
   0  -7   1 1152.18   83.79 
   0   7  -1  923.81   75.59 
   0   7  -1 1004.40   73.79 
   0   7  -1 1157.98   79.49 
   0   7   1 1066.39   65.79 
   0   7  -1 1016.20   67.29 
   0   7  -1 1033.80   76.39 
   0   7   1 1098.09   77.49 
   0   7  -1 1135.29   66.19 
   0   7  -1  960.40   54.39 
   0   7  -1 1019.00   68.79 
   0   7   1  961.70   77.19 
   0   7   1  980.30   59.39 
   0   7   1 1037.20   73.09 
   0   7   1 1034.80   76.79 
   0   7  -1  897.41   67.49 
   0   7   1  947.41   68.89 
   0   7   1 1012.20   60.69 
   0   7   1  989.80   75.09 
   0   7   1  960.40   63.89 
   0   7   1  953.60   70.79 
   0   7  -1 1060.79   67.79 
   0   7  -1  902.11   71.89 
   0   7   1  970.20   76.89 
   0   7   1 1069.69   46.30 
   0   7  -1 1029.60   67.29 
   0   7   1  954.40   63.09 
   0   7  -1 1154.78   76.09 
   0   7  -1 1059.99   58.09 
   0   7   1  994.10   78.79 
   0   7  -1  933.91   76.19 
   0   7  -1 1085.19   80.59 
   0   7   1  968.10   58.59 
  -1  -7  -1 1052.59   80.69 
  -1  -7  -1 1159.38  102.49 
   1  -7   1 1143.79   61.29 
  -1  -7  -1 1005.10   76.29 
   1  -7   1 1037.60  112.09 
  -1  -7  -1 1033.10   79.79 
   1  -7   1 1191.58   87.49 
   1  -7   1 1306.87   82.59 
  -1  -7  -1 1188.48   82.89 
  -1  -7  -1 1162.68   86.79 
   1  -7   1 1172.88   77.39 
  -1  -7  -1 1082.59   86.09 
   1  -7   1 1099.99   72.79 
   1  -7   1 1015.30   83.29 
   1  -7   1 1086.89   84.69 
  -1  -7  -1  880.41  121.19 
  -1  -7  -1 1046.10   78.59 
  -1  -7  -1 1071.49   73.09 
  -1  -7  -1 1025.60   77.79 
  -1  -7  -1 1170.08  128.29 
  -1  -7  -1 1150.88   86.49 
  -1  -7  -1  930.41   97.59 
  -1   7  -1 1041.20   58.89 
  -1   7  -1 1055.09   70.99 
   1   7   1 1130.79   68.89 
   1   7   1 1202.08   84.39 
   1   7   1 1119.59   76.09 
  -1   7  -1 1092.49   70.29 
   1   7   1 1118.19   84.29 
  -1   7  -1 1198.28   74.89 
  -1   7  -1 1240.48   68.39 
  -1   7  -1 1146.89   83.19 
  -1   7  -1 1146.29   78.99 
   1   7   1 1192.18   53.79 
   1   7   1 1008.90   72.49 
  -1   7  -1 1023.70   57.59 
   1   7   1 1303.27   74.49 
  -1   7  -1 1068.19   69.19 
  -1   7  -1  960.30   75.39 
   1   7   1  932.81   79.99 
   1   7   1 1035.10   69.09 
   1   7   1 1087.99   81.39 
   1   7   1 1090.59   82.19 
   1   7   1  963.70   74.59 
   1   7   1  995.60   63.89 
   1   7   1 1096.39   72.79 
  -1   7  -1 1154.78   83.89 
  -1   7  -1  997.60   78.49 
  -1   7  -1 1042.80   64.39 
  -1   7  -1 1114.19   71.09 
   1   7   1 1028.50   77.09 
  -1   7  -1 1025.50   73.29 
   2  -7   1 1110.69   87.29 
  -2  -7  -1 1280.77   93.19 
  -2  -7  -1 1359.46   86.79 
  -2  -7  -1 1256.17   83.59 
  -2  -7  -1  703.53   88.69 
   2  -7   1 1166.28   84.29 
  -2  -7  -1 1206.78   83.59 
   2  -7   1 1429.56  105.89 
  -2  -7  -1 1183.78  138.99 
   2  -7   1 1218.58   96.29 
  -2  -7  -1 1159.28  126.79 
   2  -7   1 1339.27   78.39 
  -2  -7  -1 1122.79   82.89 
  -2  -7  -1 1175.08   90.69 
  -2  -7  -1 1289.17   90.39 
  -2  -7  -1  964.40  124.89 
   2  -7   1 1212.08   68.79 
   2   7   1 1312.67   95.79 
   2   7   1 1244.18   89.99 
  -2   7  -1 1316.57   84.19 
  -2   7  -1 1282.67   71.19 
  -2   7  -1 1126.79   75.49 
   2   7   1 1229.18   89.39 
   2   7   1 1231.98   79.09 
   2   7   1 1246.58   83.39 
   2   7   1 1294.17   88.19 
  -2   7  -1 1201.28   66.39 
  -2   7  -1 1222.88   89.89 
   2   7   1 1193.58   76.89 
   2   7   1 1214.68   62.39 
  -2   7  -1 1123.59   85.79 
   2   7   1 1203.08   78.99 
  -2   7  -1 1225.08   86.89 
   2   7   1 1251.27   92.39 
  -2   7  -1 1195.68   75.69 
  -2   7  -1 1317.67   67.09 
   2   7   1 1059.49   71.19 
   2   7   1 1140.19   80.79 
  -2   7  -1 1232.08   80.59 
  -2   7  -1 1166.08   72.79 
  -2   7  -1 1172.18   73.99 
   2   7   1 1052.19   69.29 
   2   7   1 1255.47   87.29 
  -2   7  -1 1306.27   79.49 
   2   7   1 1458.65   82.89 
  -3  -7  -1  343.87   55.49 
  -3  -7  -1  516.95   89.19 
  -3  -7  -1  442.66   70.29 
   3  -7   1  283.97   51.29 
   3  -7   1  340.37   51.09 
   3  -7   1  365.66   69.29 
  -3  -7  -1  398.26   82.59 
  -3  -7  -1  283.27   49.30 
  -3  -7  -1  411.46   58.79 
  -3  -7  -1  372.96   60.49 
   3  -7   1  405.86   77.49 
   3  -7   1  458.95   47.00 
  -3  -7  -1  330.47   54.49 
   3  -7   1  472.45   56.29 
  -3  -7  -1  445.66   60.29 
  -3   7  -1  394.96   46.20 
   3   7   1  390.86   43.70 
  -3   7  -1  460.05   56.59 
   3   7   1  254.27   47.30 
  -3   7  -1  341.27   49.60 
   3   7   1  286.77   52.59 
   3   7   1  440.16   51.89 
   3   7   1  368.56   60.89 
   3   7   1  367.66   53.39 
  -3   7  -1  347.17   51.79 
   3   7   1  553.84   78.79 
   3   7   1  403.46   56.69 
  -3   7  -1  514.25   56.69 
   3   7   1  294.47   45.20 
  -3   7  -1  345.07   54.09 
  -3   7  -1  414.26   57.69 
   3   7   1  351.66   52.49 
   3   7   1  357.66   41.80 
   3   7   1  411.56   61.99 
  -3   7  -1  377.66   45.80 
  -3   7  -1  360.76   64.09 
   3   7   1  351.16   50.59 
  -3   7  -1  403.06   49.60 
  -4  -7  -1  793.72   92.39 
  -4  -7  -1  810.12  114.29 
  -4  -7  -1  808.12   93.39 
   4  -7   1  774.42   63.29 
  -4  -7  -1  625.94   75.09 
  -4  -7  -1  691.83   79.49 
  -4  -7  -1  798.62  112.39 
   4  -7   1  635.44   92.69 
   4  -7   1  797.92   88.79 
  -4  -7  -1  455.95   72.59 
  -4  -7  -1  526.95   72.79 
   4  -7   1  734.03   61.79 
  -4  -7  -1  679.63   82.99 
   4   7   1  716.93   93.19 
   4   7   1  769.42   82.09 
   4   7   1  739.53   89.09 
   4   7   1  788.72   81.29 
   4   7   1  789.32   92.79 
   4   7   1  537.55   58.49 
  -4   7  -1  789.32   61.89 
   4   7   1  732.73   81.49 
  -4   7  -1  699.83   78.59 
   4   7   1  569.54   76.59 
   4   7   1  660.63   72.29 
  -4   7  -1  777.92   85.29 
  -4   7  -1  622.34   78.09 
   4   7   1  887.11   87.39 
  -4   7  -1  804.92   96.39 
   4   7   1  887.21   95.59 
   4   7   1  789.12   85.79 
   4   7   1  492.05   66.49 
  -4   7  -1  750.42   61.49 
  -5  -7  -1  184.18   47.80 
  -5  -7  -1  103.79   36.20 
  -5  -7  -1  159.98   35.10 
  -5  -7  -1  149.69   44.40 
  -5  -7  -1  164.98   48.70 
   5  -7   1  184.48   42.20 
  -5  -7  -1  107.39   45.20 
   5  -7   1  132.19   36.40 
  -5  -7  -1  178.38   42.70 
   5  -7   1  128.89   40.90 
   5  -7   1  110.89   34.90 
  -5  -7  -1   99.39   35.10 
  -5  -7  -1  117.29   47.70 
  -5  -7  -1  186.48   50.29 
   5   7   1  125.89   33.00 
  -5   7  -1  122.89   33.90 
   5   7   1  255.27   56.59 
   5   7   1  154.48   45.30 
  -5   7  -1  130.39   39.50 
   5   7   1  151.58   42.60 
   5   7   1  190.58   47.20 
  -5   7  -1  122.59   40.40 
   5   7   1  127.79   38.10 
   5   7   1  150.98   37.30 
   5   7   1  119.59   36.00 
  -5   7  -1   76.29   35.50 
  -5   7  -1  114.39   35.60 
   5   7   1  220.18   54.99 
   5   7   1  179.38   54.59 
   5   7   1  118.19   31.50 
   5   7   1  144.09   41.40 
   5   7   1  194.88   42.30 
   5   7   1  167.38   44.40 
  -6  -7  -1   59.69   36.30 
  -6  -7  -1   23.10   27.80 
  -6  -7  -1   25.00   28.40 
  -6  -7  -1   35.80   27.50 
  -6  -7  -1   69.49   42.10 
  -6  -7  -1   14.70   24.90 
  -6  -7  -1   37.40   30.30 
  -6  -7  -1   90.69   35.70 
  -6  -7  -1   77.59   39.30 
   6  -7   1  103.39   33.00 
   6   7   1   40.10   24.10 
   6   7   1   28.70   27.30 
  -6   7  -1   32.50   26.00 
   6   7   1   54.99   29.80 
   6   7   1   66.59   34.60 
   6   7   1  100.29   37.80 
   6   7   1   68.19   28.20 
   6   7   1   29.50   24.20 
   6   7   1   21.00   23.10 
  -6   7  -1   72.29   30.80 
  -6   7  -1   74.49   35.10 
   6   7   1   93.69   36.00 
   6   7   1   63.49   29.30 
   6   7   1  114.09   39.80 
   6   7   1  129.99   42.60 
  -6   7  -1   74.09   28.30 
  -7  -7  -1   17.60   28.50 
  -7  -7  -1    1.10   23.10 
  -7  -7  -1  -12.80   26.20 
  -7  -7  -1   34.30   28.60 
  -7  -7  -1   40.80   31.70 
  -7  -7  -1   18.00   21.60 
  -7  -7  -1   12.10   24.70 
  -7  -7  -1   14.10   23.70 
  -7  -7  -1  -19.40   30.50 
   7   7   1    5.80   21.10 
   7   7   1   15.20   22.50 
   7   7   1   29.00   23.10 
   7   7   1  -16.90   16.00 
  -7   7  -1   33.80   32.10 
   7   7   1   -0.10   21.00 
   7   7   1   15.00   25.00 
   7   7   1   -6.00   21.50 
   7   7   1    9.00   23.50 
   7   7   1   24.70   24.60 
  -7   7  -1   14.00   24.10 
   7   7   1    1.20   18.40 
   7   7   1  -10.10   18.70 
  -6  -8   1   44.60   29.30 
  -6  -8   1   81.39   37.70 
  -6  -8   1  112.39   42.20 
  -6  -8   1  115.19   40.40 
  -6  -8   1   75.09   34.30 
  -6  -8   1  103.29   52.69 
  -6  -8   1  121.19   47.00 
  -6  -8   1   95.19   49.90 
  -6  -8   1   80.09   37.70 
   6   8  -1   54.89   29.40 
   6   8  -1  105.29   42.70 
  -6   8   1   89.99   36.20 
   6   8  -1   89.99   43.80 
  -6   8   1   77.89   34.70 
  -6   8   1   88.49   38.70 
   6   8  -1   99.79   42.80 
   6   8  -1   69.69   34.40 
   6   8  -1   60.19   33.30 
  -6   8   1   63.39   33.90 
   6   8  -1   93.59   35.20 
   6   8  -1   55.79   28.60 
   6   8  -1   44.20   28.70 
   6   8  -1   84.49   35.90 
   6   8  -1   54.59   34.10 
  -5  -8   1  399.56   72.49 
  -5  -8   1  576.04   83.79 
  -5  -8   1  680.73   94.79 
  -5  -8   1  328.87   76.29 
  -5  -8   1  446.36   89.19 
  -5  -8   1  406.06   75.49 
  -5  -8   1  550.84   82.99 
  -5  -8   1  532.75   81.09 
  -5  -8   1  546.85   78.79 
  -5   8   1  566.04   78.29 
   5   8  -1  401.26   70.09 
   5   8  -1  461.65   81.09 
   5   8  -1  516.45   72.39 
   5   8  -1  446.86   73.99 
   5   8  -1  548.25   79.89 
   5   8  -1  598.54   78.99 
  -5   8   1  474.95   70.59 
   5   8  -1  549.25   86.19 
   5   8  -1  642.84   93.39 
  -5   8   1  698.23   94.99 
   5   8  -1  509.65   74.89 
  -5   8   1  536.55   86.49 
   5   8  -1  550.34   74.49 
  -4  -8   1  142.89   40.60 
  -4  -8   1  115.49   40.00 
  -4  -8   1   91.19   38.10 
  -4  -8   1  118.49   39.40 
  -4  -8   1   77.19   36.40 
  -4  -8   1   57.39   36.50 
   4  -8  -1   78.99   32.60 
  -4  -8   1  113.29   38.90 
  -4  -8   1  188.18   46.00 
  -4  -8   1  119.99   50.19 
  -4  -8   1  137.09   39.60 
   4   8  -1  113.79   37.10 
   4   8  -1   82.89   34.10 
   4   8  -1   84.09   28.60 
   4   8  -1   42.90   29.60 
  -4   8   1  184.78   46.40 
   4   8  -1  135.79   41.20 
  -4   8   1   95.59   35.40 
   4   8  -1   98.59   34.60 
   4   8  -1  151.18   43.90 
  -4   8   1  101.39   37.90 
  -4   8   1   97.89   37.60 
   4   8  -1  216.48   48.50 
   4   8  -1  110.19   35.80 
   4   8  -1  151.08   39.60 
  -3  -8   1  253.27   67.99 
  -3  -8   1  239.38   50.69 
  -3  -8   1  222.38   66.89 
  -3  -8   1  238.88   48.10 
   3  -8  -1  214.28   51.29 
  -3  -8   1  284.27   57.39 
  -3  -8   1  281.47   66.29 
  -3  -8   1  204.18   49.60 
   3  -8  -1  364.86   92.59 
  -3  -8   1  299.47   61.89 
  -3  -8   1  368.56   61.59 
  -3  -8   1  268.77   54.69 
   3  -8  -1  240.38   66.69 
  -3  -8   1  283.17   55.49 
  -3  -8   1  258.27   54.29 
   3   8  -1  192.68   45.40 
  -3   8   1  247.68   50.49 
   3   8  -1  251.37   50.09 
   3   8  -1  375.36   55.39 
   3   8  -1  247.38   47.70 
   3   8  -1  286.07   57.39 
  -3   8   1  277.17   53.69 
  -3   8   1  350.26   63.09 
  -3   8   1  271.07   43.10 
  -3   8   1  249.38   46.70 
   3   8  -1  318.07   55.79 
  -3   8   1  244.98   47.80 
   3   8  -1  293.07   55.69 
  -3   8   1  251.47   44.50 
  -3   8   1  304.77   47.50 
   3   8  -1  421.36   60.19 
   3   8  -1  405.76   63.79 
   3   8  -1  294.67   58.09 
  -3   8   1  208.48   48.20 
   3   8  -1  280.77   46.30 
  -3   8   1  446.76   60.09 
  -2  -8   1   10.40   28.50 
   2  -8  -1   10.90   17.10 
  -2  -8   1   23.70   18.20 
  -2  -8   1   -2.10   17.30 
  -2  -8   1   35.50   25.40 
  -2  -8   1   -6.90   17.80 
   2  -8  -1  -10.20   14.60 
  -2  -8   1    7.20   20.80 
  -2  -8   1   18.30   22.40 
   2  -8  -1   21.60   21.60 
   2  -8  -1   -0.40   24.60 
  -2  -8   1   12.50   18.90 
  -2  -8   1   20.40   27.60 
  -2  -8   1   -9.10   19.30 
   2  -8  -1    4.10   19.70 
  -2  -8   1   36.00   35.40 
  -2  -8   1   10.90   21.50 
  -2  -8   1   15.70   35.70 
  -2   8   1   -0.90   17.10 
   2   8  -1   -4.60   17.80 
   2   8  -1    2.10   14.70 
   2   8  -1   12.70   20.60 
  -2   8   1    0.60   13.80 
  -2   8   1    1.50   15.70 
   2   8  -1    5.60   13.50 
  -2   8   1   30.80   24.30 
  -2   8   1   -0.10   13.80 
   2   8  -1   -0.40   15.90 
  -2   8   1    2.50   15.40 
   2   8  -1  -17.90   13.50 
  -2   8   1    9.50   15.30 
  -2   8   1    4.70   15.90 
   2   8  -1   -0.20   14.50 
  -2   8   1   -5.60   14.10 
   2   8  -1  -11.60   12.40 
  -2   8   1    7.80   18.90 
   2   8  -1    1.50   13.70 
   2   8  -1   -3.40   14.90 
   2   8  -1   -2.10   14.80 
   2   8  -1   18.50   18.90 
  -2   8   1   -7.20   12.80 
  -2   8   1   11.20   14.20 
  -1  -8   1    3.10   28.10 
  -1  -8   1   15.10   18.90 
  -1  -8   1  -17.10   21.90 
  -1  -8   1    8.70   19.50 
   1  -8  -1    5.60   16.40 
  -1  -8   1   -3.80   20.60 
   1  -8  -1   -7.40   20.50 
  -1  -8   1   49.20   28.90 
  -1  -8   1    1.00   23.60 
  -1  -8   1   28.40   19.10 
   1  -8  -1   -3.90   19.00 
  -1  -8   1   19.00   20.30 
  -1  -8   1   10.30   17.00 
  -1  -8   1   -2.30   18.30 
   1  -8  -1   -1.80   14.10 
  -1  -8   1   25.80   22.70 
  -1  -8   1   -7.50   25.00 
   1  -8  -1   47.90   28.40 
   1  -8  -1  -22.60   14.20 
  -1   8   1    5.00   12.50 
   1   8  -1   19.80   18.30 
   1   8  -1    6.40   13.00 
  -1   8   1   -1.60   14.00 
   1   8  -1  -10.90   11.40 
   1   8  -1   -2.60   16.40 
   1   8  -1   15.30   19.40 
   1   8  -1    2.70   13.00 
   1   8  -1   12.80   16.70 
  -1   8   1   16.60   18.50 
   1   8  -1   12.80   19.20 
  -1   8   1    2.40   13.00 
   1   8  -1   22.10   17.90 
   1   8  -1    5.70   16.50 
  -1   8   1    8.20   14.10 
  -1   8   1    4.10   13.80 
  -1   8   1    3.60   13.70 
   1   8  -1   12.40   16.60 
  -1   8   1   14.80   18.90 
  -1   8   1   -3.10   14.80 
   1   8  -1   37.10   17.40 
  -1   8   1   -3.00   14.30 
  -1   8   1    0.10   12.90 
  -1   8   1   -9.20   10.10 
  -1   8   1    8.80   18.30 
   1   8  -1    9.20   17.40 
   0  -8   1  250.87   52.29 
   0  -8   1  183.38   44.60 
   0  -8  -1  149.99   40.30 
   0  -8   1  119.29   34.70 
   0  -8  -1  140.09   38.40 
   0  -8   1  169.78   40.20 
   0  -8   1  132.79   39.50 
   0  -8   1  190.58   45.40 
   0  -8   1  199.18   47.30 
   0  -8  -1  177.48   43.60 
   0  -8  -1  180.58   50.09 
   0  -8  -1  257.17   69.49 
   0  -8   1  182.68   35.60 
   0  -8   1  189.08   53.99 
   0  -8   1  152.48   48.70 
   0  -8  -1  167.48   35.60 
   0  -8  -1  194.58   43.50 
   0  -8   1  121.59   48.10 
   0  -8  -1  144.69   42.90 
   0  -8  -1  194.48   42.60 
   0  -8  -1  245.38   59.09 
   0  -8  -1  104.79   38.50 
   0   8  -1  105.89   27.70 
   0   8  -1  213.48   36.60 
   0   8   1  155.28   31.60 
   0   8  -1  187.08   35.00 
   0   8   1  142.59   38.40 
   0   8   1  163.68   39.50 
   0   8   1  212.38   37.90 
   0   8   1  220.78   47.00 
   0   8  -1   87.99   29.80 
   0   8   1  210.28   43.50 
   0   8  -1  180.18   36.90 
   0   8  -1  160.68   42.00 
   0   8  -1  153.78   40.30 
   0   8   1  165.98   33.60 
   0   8   1  161.78   36.60 
   0   8  -1  184.28   46.30 
   0   8   1  130.09   37.60 
   0   8  -1  186.78   41.90 
   0   8   1  119.49   32.90 
   0   8   1  202.78   32.50 
   0   8   1  224.98   44.10 
   0   8  -1  167.28   35.80 
   0   8  -1  203.78   45.80 
   0   8  -1  187.58   39.80 
   0   8   1  188.38   40.90 
   0   8   1  224.18   40.40 
   0   8   1  210.68   46.20 
   0   8  -1  133.69   35.50 
   0   8   1  131.79   38.80 
  -1  -8  -1  673.33  104.49 
  -1  -8  -1  685.53   79.89 
   1  -8   1  734.03   92.49 
  -1  -8  -1  631.54   84.09 
  -1  -8  -1  580.34   76.39 
  -1  -8  -1  648.84   77.79 
   1  -8   1  497.05   73.49 
   1  -8   1  715.43   92.49 
  -1  -8  -1  718.73   86.69 
  -1  -8  -1  636.94   84.39 
  -1  -8  -1  710.53  121.39 
  -1  -8  -1  492.65   69.19 
  -1  -8  -1  649.83   72.59 
  -1  -8  -1  723.43   97.49 
  -1  -8  -1  779.92   93.59 
   1  -8   1  857.81   98.99 
   1  -8   1  654.33   75.89 
  -1   8  -1  668.33   80.79 
  -1   8  -1  724.93   77.99 
  -1   8  -1  727.83   57.89 
   1   8   1  755.72   63.19 
   1   8   1  662.83   76.89 
  -1   8  -1  731.33   76.39 
  -1   8  -1  719.83   53.89 
   1   8   1  741.23   57.49 
   1   8   1  676.93   81.19 
  -1   8  -1  611.44   73.89 
   1   8   1  819.42   94.39 
   1   8   1  671.83   69.29 
  -1   8  -1  631.14   82.59 
  -1   8  -1  569.04   76.99 
   1   8   1  702.53   71.29 
  -1   8  -1  731.53   76.39 
   1   8   1  553.44   76.99 
  -1   8  -1  621.94   52.19 
  -1   8  -1  687.83   68.99 
   1   8   1  586.64   72.79 
   1   8   1  620.94   66.39 
  -1   8  -1  616.04   64.09 
   1   8   1  709.93   86.79 
  -1   8  -1  618.54   78.59 
   1   8   1  735.53   84.19 
  -1   8  -1  693.43   72.99 
   1   8   1  631.64   52.19 
   1   8   1  764.12   79.59 
  -2  -8  -1  219.88   49.00 
  -2  -8  -1  118.39   34.00 
  -2  -8  -1  149.49   53.49 
  -2  -8  -1  155.38   56.59 
  -2  -8  -1  205.98   44.60 
  -2  -8  -1  231.18   49.60 
   2  -8   1  181.28   46.20 
  -2  -8  -1  237.68   68.59 
  -2  -8  -1  319.97   56.79 
  -2  -8  -1  212.58   47.00 
   2  -8   1  186.58   51.39 
   2  -8   1  169.28   42.90 
  -2  -8  -1  224.28   50.69 
  -2  -8  -1  207.68   50.09 
  -2  -8  -1  193.98   46.80 
  -2   8  -1  160.18   40.90 
   2   8   1  171.38   37.40 
   2   8   1  159.78   42.30 
   2   8   1  145.69   39.00 
   2   8   1  180.88   37.90 
   2   8   1  147.99   43.90 
   2   8   1  174.28   37.70 
   2   8   1  205.88   38.00 
   2   8   1  166.98   41.80 
  -2   8  -1  147.39   33.70 
  -2   8  -1  164.68   43.30 
  -2   8  -1  228.78   51.59 
  -2   8  -1  189.78   37.10 
  -2   8  -1  164.08   33.60 
   2   8   1  241.68   40.60 
   2   8   1  223.78   43.40 
   2   8   1  284.57   47.80 
   2   8   1  156.78   39.80 
  -2   8  -1  185.88   35.70 
  -2   8  -1  170.38   38.30 
  -2   8  -1  186.08   40.40 
  -2   8  -1  173.48   40.90 
  -2   8  -1  203.48   37.50 
   2   8   1  217.78   48.90 
  -3  -8  -1  891.81   99.49 
  -3  -8  -1  946.61  122.79 
  -3  -8  -1 1117.19  105.99 
  -3  -8  -1  801.52  102.39 
  -3  -8  -1  779.82  121.29 
   3  -8   1  917.41  102.49 
  -3  -8  -1  996.10   82.99 
  -3  -8  -1  984.80  103.29 
  -3  -8  -1  636.94   83.69 
  -3  -8  -1  780.52  122.69 
   3  -8   1  848.12  118.69 
  -3  -8  -1  775.62   91.19 
  -3  -8  -1  884.21   91.59 
  -3   8  -1  815.32   96.89 
   3   8   1  833.12   95.39 
   3   8   1  801.62   88.89 
   3   8   1  975.30  111.39 
   3   8   1  875.11   98.69 
   3   8   1 1003.50   74.39 
   3   8   1  814.12   88.89 
   3   8   1  869.21   69.49 
   3   8   1  978.40   76.59 
   3   8   1  919.01  105.49 
  -3   8  -1  900.11   71.89 
  -3   8  -1  916.51   75.19 
   3   8   1  842.72   86.39 
   3   8   1  829.52   94.79 
  -3   8  -1  883.81   68.19 
  -3   8  -1  976.40  105.59 
  -3   8  -1  943.61   98.29 
   4  -8   1   16.30   23.50 
  -4  -8  -1   61.69   40.60 
  -4  -8  -1   46.00   26.60 
  -4  -8  -1   37.70   35.10 
  -4  -8  -1   16.60   21.30 
  -4  -8  -1   50.49   26.90 
  -4  -8  -1  104.09   36.60 
  -4  -8  -1   53.19   29.30 
  -4  -8  -1   28.20   28.80 
  -4  -8  -1   67.69   31.20 
  -4   8  -1   27.10   22.00 
  -4   8  -1   75.09   32.80 
   4   8   1   68.19   30.10 
   4   8   1   23.50   20.90 
   4   8   1   60.29   24.90 
   4   8   1   13.50   18.90 
   4   8   1   25.40   21.20 
   4   8   1   34.70   28.50 
   4   8   1   34.70   22.10 
   4   8   1   47.10   32.80 
  -4   8  -1   41.80   29.40 
   4   8   1   46.70   26.60 
   4   8   1   10.30   17.60 
   4   8   1   36.50   24.00 
  -5  -8  -1  945.81  119.79 
  -5  -8  -1  637.74   87.09 
  -5  -8  -1  859.31  131.49 
  -5  -8  -1  923.51  109.19 
  -5  -8  -1  937.11  132.49 
  -5  -8  -1  823.42   95.79 
  -5  -8  -1  824.92   98.79 
   5  -8   1  957.30  106.39 
  -5  -8  -1  699.03   91.49 
   5   8   1  708.83  101.39 
   5   8   1  782.92   96.49 
   5   8   1  590.44   83.79 
   5   8   1  704.23   86.79 
   5   8   1  849.41   96.39 
   5   8   1  937.01  108.99 
   5   8   1  867.41   99.99 
   5   8   1  679.73   84.59 
   5   8   1  818.62  102.59 
  -5   8  -1  633.44   97.79 
   5   8   1  844.92   91.79 
   5   8   1  808.52  105.69 
  -5   8  -1  795.22   91.79 
  -5   8  -1  871.11   96.29 
   5   8   1  909.11   98.89 
  -6  -8  -1   78.29   37.00 
  -6  -8  -1   34.30   34.30 
  -6  -8  -1  112.19   46.80 
  -6  -8  -1   34.30   32.80 
  -6  -8  -1   77.69   45.80 
  -6  -8  -1   31.70   28.80 
  -6  -8  -1   52.29   45.10 
   6  -8   1   35.10   28.90 
  -6  -8  -1   45.80   37.70 
  -6   8  -1   82.39   41.10 
   6   8   1   62.79   30.90 
   6   8   1   64.99   38.00 
   6   8   1  117.09   41.60 
   6   8   1  104.49   41.90 
   6   8   1   65.69   31.30 
   6   8   1   81.19   38.30 
   6   8   1   90.29   40.80 
   6   8   1   44.70   27.00 
   6   8   1   79.19   34.90 
   6   8   1   67.89   35.80 
  -6   8  -1   19.00   28.10 
  -6   8  -1   63.19   34.40 
   6   8   1   43.60   30.60 
  -6   8  -1  162.08   48.90 
  -5  -9   1   11.20   24.40 
  -5  -9   1   41.10   27.90 
  -5  -9   1   59.69   34.50 
  -5  -9   1   81.39   39.60 
  -5  -9   1   67.09   39.90 
  -5  -9   1   32.30   28.80 
  -5  -9   1   88.99   43.50 
  -5  -9   1   79.59   43.50 
  -5  -9   1   44.00   45.20 
  -5  -9   1   42.80   35.00 
   5   9  -1   94.89   43.30 
   5   9  -1   93.89   37.60 
   5   9  -1   19.50   24.60 
   5   9  -1   72.69   37.30 
   5   9  -1   89.19   39.40 
  -5   9   1   12.90   29.20 
  -5   9   1   43.70   31.20 
   5   9  -1   50.99   33.40 
   5   9  -1   58.49   28.80 
  -5   9   1   63.59   32.10 
   5   9  -1   37.20   29.60 
   5   9  -1   95.89   45.10 
  -5   9   1   73.89   37.10 
  -4  -9   1 1812.62  207.08 
  -4  -9   1 1886.21  135.59 
  -4  -9   1 1543.95  121.69 
  -4  -9   1 1792.22  121.79 
  -4  -9   1 1494.45  122.09 
  -4  -9   1 1622.44  123.89 
  -4  -9   1 1628.64  126.99 
  -4  -9   1 1556.54  170.58 
  -4  -9   1 1584.64  122.59 
   4  -9  -1 1541.05  123.29 
  -4  -9   1 1790.42  133.09 
  -4   9   1 1432.76  120.29 
   4   9  -1 1552.04  114.09 
   4   9  -1 1701.23  122.09 
   4   9  -1 1587.54  121.39 
   4   9  -1 1468.05  112.29 
   4   9  -1 1661.33  125.79 
   4   9  -1 1668.13  112.99 
   4   9  -1 1807.62  119.69 
   4   9  -1 1972.40  140.99 
  -4   9   1 1340.77  109.39 
  -4   9   1 1661.63  120.19 
   4   9  -1 1600.84  126.99 
  -4   9   1 1551.34  121.99 
  -3  -9   1   87.89   43.00 
  -3  -9   1   90.29   38.70 
  -3  -9   1  137.09   50.49 
  -3  -9   1   72.39   36.60 
  -3  -9   1   38.40   28.30 
  -3  -9   1   17.60   26.20 
  -3  -9   1   66.49   30.90 
  -3  -9   1   81.69   50.69 
  -3  -9   1   83.69   35.20 
  -3  -9   1  128.69   44.10 
  -3  -9   1   98.39   53.49 
   3  -9  -1   79.09   38.90 
   3   9  -1   28.00   25.70 
  -3   9   1   18.00   26.00 
  -3   9   1   72.79   33.40 
   3   9  -1   17.80   23.20 
   3   9  -1   97.19   36.60 
  -3   9   1  114.89   40.90 
   3   9  -1   72.99   35.40 
   3   9  -1  139.59   38.60 
  -3   9   1  163.08   43.80 
  -3   9   1   40.50   24.90 
   3   9  -1  103.49   42.60 
   3   9  -1   36.00   27.70 
   3   9  -1   77.69   34.40 
   3   9  -1  138.09   44.00 
  -2  -9   1 1224.78  176.18 
   2  -9  -1  925.21  119.89 
  -2  -9   1  847.92  137.49 
  -2  -9   1 1307.27  109.69 
  -2  -9   1 1010.20  115.19 
  -2  -9   1 1021.10  111.49 
  -2  -9   1  920.61  108.29 
   2  -9  -1  837.02  106.09 
  -2  -9   1 1010.70  108.09 
  -2  -9   1 1059.49  123.19 
  -2  -9   1 1012.00  110.89 
  -2  -9   1 1166.08   88.49 
   2   9  -1 1130.49   86.49 
   2   9  -1 1051.59   85.89 
   2   9  -1 1070.89  115.39 
  -2   9   1 1147.49  114.89 
  -2   9   1 1206.28  123.19 
   2   9  -1 1097.99  115.89 
   2   9  -1  931.21  105.19 
  -2   9   1  993.10   87.89 
  -2   9   1 1171.28   85.59 
   2   9  -1  934.41  103.09 
  -2   9   1 1148.39  115.99 
  -2   9   1 1179.88  146.59 
   2   9  -1 1044.80  114.39 
  -2   9   1 1094.09  116.79 
   2   9  -1  825.02   89.99 
   2   9  -1  779.92   92.69 
   2   9  -1  999.40   97.69 
  -2   9   1  945.21   97.39 
  -2   9   1  988.60   77.59 
  -1  -9   1   11.40   19.50 
  -1  -9   1  -15.10   18.60 
  -1  -9   1   -9.90   16.40 
   1  -9  -1   -4.00   20.30 
  -1  -9   1    1.40   17.90 
  -1  -9   1    1.40   20.70 
  -1  -9   1    3.00   20.70 
  -1  -9   1   -1.30   20.80 
  -1  -9   1   -4.70   25.70 
   1  -9  -1    4.00   22.30 
   1  -9  -1   -5.90   20.60 
   1   9  -1   -3.50   16.10 
  -1   9   1  -20.00   16.90 
  -1   9   1  -11.40   13.50 
   1   9  -1  -16.70   16.30 
   1   9  -1  -10.20   16.10 
   1   9  -1  -17.30   14.00 
  -1   9   1   -4.80   16.20 
   1   9  -1  -14.60   15.00 
  -1   9   1   -9.50   17.70 
  -1   9   1  -17.20   17.20 
  -1   9   1    7.70   18.80 
   1   9  -1    3.50   16.80 
   1   9  -1   -3.00   17.40 
   1   9  -1    2.10   19.90 
  -1   9   1  -10.60   15.50 
   1   9  -1   -0.50   14.30 
   1   9  -1   -9.70   15.40 
  -1   9   1  -17.50   14.00 
  -1   9   1    4.30   17.10 
  -1   9   1    1.20   18.70 
   0  -9  -1 1564.54  104.89 
   0  -9   1 1309.07  127.39 
   0  -9  -1 1080.49  111.19 
   0  -9  -1 1131.69  150.48 
   0  -9   1 1293.57  100.39 
   0  -9  -1 1219.38  100.19 
   0  -9   1 1254.17  126.29 
   0  -9  -1 1240.78   99.29 
   0  -9   1 1081.49  115.09 
   0  -9  -1 1426.36  115.39 
   0  -9   1 1341.37  151.48 
   0  -9   1 1158.38  123.49 
   0  -9  -1 1360.26  112.39 
   0   9   1 1224.78   92.49 
   0   9  -1 1333.37   99.19 
   0   9   1 1235.18  100.29 
   0   9   1 1291.77   84.19 
   0   9  -1 1196.08   91.99 
   0   9   1 1525.15  112.89 
   0   9   1 1289.27   97.89 
   0   9   1 1158.88   89.59 
   0   9  -1 1177.88   93.09 
   0   9  -1 1187.68   87.79 
   0   9  -1 1032.70  114.79 
   0   9   1 1106.49   89.79 
   0   9   1 1234.28  100.19 
   0   9  -1 1056.29   90.49 
   0   9   1 1266.27   99.49 
   0   9  -1 1339.17  105.39 
   0   9  -1 1094.89   82.59 
   0   9  -1 1209.28   96.69 
   0   9  -1 1112.19   93.89 
   0   9   1 1131.29   93.19 
   0   9   1 1244.88   94.39 
   0   9   1 1326.47   88.09 
  -1  -9  -1  -12.80   15.30 
  -1  -9  -1   -5.60   16.70 
   1  -9   1    5.50   22.50 
  -1  -9  -1   -8.00   20.80 
  -1  -9  -1    8.20   20.60 
  -1  -9  -1    7.10   20.90 
  -1  -9  -1  -13.90   15.50 
  -1  -9  -1  -11.10   17.60 
   1  -9   1    6.60   28.00 
   1  -9   1    7.30   22.60 
  -1  -9  -1    2.20   22.70 
   1  -9   1   -8.90   19.70 
  -1  -9  -1   -2.30   28.60 
   1   9   1    7.10   17.50 
   1   9   1   13.10   16.70 
  -1   9  -1   -6.80   15.50 
  -1   9  -1    6.60   19.80 
  -1   9  -1   16.70   20.80 
   1   9   1    6.00   18.10 
   1   9   1   -6.20   14.60 
   1   9   1   -1.70   18.40 
   1   9   1    4.70   16.50 
   1   9   1    4.60   19.60 
  -1   9  -1   24.20   26.40 
   1   9   1   21.10   21.10 
   1   9   1    4.60   19.30 
   1   9   1  -16.90   15.40 
  -1   9  -1  -21.50   17.50 
   1   9   1    4.10   20.40 
  -1   9  -1   -3.30   14.00 
  -1   9  -1    1.90   18.10 
  -1   9  -1    9.20   20.20 
  -2  -9  -1 1006.40  102.89 
  -2  -9  -1  930.31  113.59 
  -2  -9  -1  830.02  105.39 
  -2  -9  -1 1118.89  115.59 
  -2  -9  -1 1087.79  116.79 
  -2  -9  -1  722.53  127.39 
  -2  -9  -1 1118.19  145.99 
   2  -9   1 1025.10  126.19 
  -2  -9  -1 1103.49  111.39 
  -2  -9  -1 1049.59  108.09 
   2  -9   1  762.52   98.49 
   2   9   1 1069.79   84.89 
   2   9   1 1055.39   83.59 
  -2   9  -1  785.32   96.99 
   2   9   1  933.21  103.49 
  -2   9  -1  945.41   80.59 
   2   9   1  927.61   90.59 
   2   9   1  991.60  107.49 
  -2   9  -1  933.01  104.49 
  -2   9  -1  908.71  105.89 
   2   9   1 1093.79  116.19 
   2   9   1  952.10  112.99 
   2   9   1 1130.59  124.39 
  -2   9  -1  953.10   78.99 
   2   9   1 1214.28   90.89 
  -2   9  -1 1018.20   79.69 
   2   9   1 1135.69  118.09 
  -2   9  -1 1093.79   89.99 
  -3  -9  -1   61.49   40.70 
  -3  -9  -1   73.79   32.10 
  -3  -9  -1   51.69   27.90 
  -3  -9  -1   52.49   33.20 
  -3  -9  -1   84.49   38.90 
  -3  -9  -1   31.40   25.10 
  -3  -9  -1  118.69   40.00 
  -3  -9  -1   28.70   39.70 
   3  -9   1   54.09   33.50 
  -3  -9  -1   63.99   47.70 
   3   9   1   52.59   30.90 
   3   9   1   14.40   28.30 
  -3   9  -1   17.50   28.10 
   3   9   1   43.90   26.90 
  -3   9  -1   23.10   22.40 
   3   9   1   39.20   28.20 
   3   9   1   44.30   27.10 
  -3   9  -1   47.00   28.10 
   3   9   1   49.80   26.10 
  -3   9  -1   18.30   23.00 
   3   9   1   30.60   23.30 
   3   9   1   26.10   24.10 
   3   9   1   84.09   36.70 
  -4  -9  -1  471.75   76.69 
  -4  -9  -1  422.46   77.89 
  -4  -9  -1  158.88   66.39 
  -4  -9  -1  352.86   66.19 
  -4  -9  -1  381.36   77.69 
  -4  -9  -1  458.15   79.49 
  -4  -9  -1  435.46   95.59 
   4  -9   1  272.87   61.39 
  -4  -9  -1  499.65   82.89 
   4   9   1  546.15   91.69 
   4   9   1  276.67   56.99 
   4   9   1  412.96   78.49 
  -4   9  -1  352.76   64.59 
  -4   9  -1  451.85   82.49 
   4   9   1  426.56   69.79 
   4   9   1  275.97   59.09 
   4   9   1  286.97   55.49 
   4   9   1  337.87   68.19 
  -4   9  -1  439.66   71.09 
   4   9   1  376.26   61.99 
   4   9   1  369.26   72.09 
   4   9   1  646.24   84.59 
  -5  -9  -1    5.30   26.20 
  -5  -9  -1    4.70   34.90 
  -5  -9  -1   20.30   41.70 
   5  -9   1   -4.80   24.20 
  -5  -9  -1  -17.70   22.30 
  -5  -9  -1    8.30   24.20 
  -5  -9  -1  -14.50   25.90 
   5   9   1   13.60   24.00 
  -5   9  -1    9.40   21.70 
  -5   9  -1   -3.20   23.30 
   5   9   1  -16.30   20.50 
   5   9   1   11.70   24.90 
   5   9   1  -11.00   21.80 
   5   9   1   -2.30   17.50 
   5   9   1  -22.60   20.20 
  -5   9  -1  -18.40   20.20 
   5   9   1   -3.40   19.70 
   5   9   1   -5.40   23.60 
  -5   9  -1  -20.70   23.90 
   5   9   1  -14.00   20.50 
   5   9   1   34.30   26.80 
   5   9   1   -5.40   22.00 
  -3 -10   1   52.39   37.50 
  -3 -10   1    4.00   22.00 
   3  10  -1   64.29   34.60 
   3  10  -1   92.99   42.00 
  -2 -10   1   13.90   31.50 
  -2 -10   1   21.90   29.10 
  -2 -10   1   -2.00   23.00 
  -2 -10   1   20.30   27.40 
   2 -10  -1   11.70   26.80 
  -2 -10   1   23.60   27.00 
  -2 -10   1   -9.80   25.10 
  -2 -10   1    2.40   36.60 
   2  10  -1    6.00   21.50 
   2  10  -1    3.00   17.90 
  -2  10   1   16.30   24.10 
   2  10  -1    7.30   20.30 
   2  10  -1   -8.40   20.20 
  -2  10   1   10.60   22.70 
   2  10  -1    0.00   20.70 
   2  10  -1   -8.40   17.50 
   2  10  -1    5.60   23.00 
  -2  10   1    1.80   25.70 
  -2  10   1   -3.50   15.80 
   2  10  -1  -15.90   20.30 
  -2  10   1    5.70   26.20 
  -1 -10   1  115.49   48.60 
  -1 -10   1   77.29   40.20 
   1 -10  -1   26.50   25.60 
  -1 -10   1  105.69   41.20 
  -1 -10   1   93.59   48.50 
  -1 -10   1   68.79   36.00 
  -1 -10   1  138.99   49.40 
   1 -10  -1   92.69   45.60 
   1  10  -1   87.89   39.10 
   1  10  -1   83.99   34.90 
   1  10  -1   71.19   35.80 
   1  10  -1   55.79   35.00 
   1  10  -1   52.09   30.20 
   1  10  -1   86.19   34.30 
  -1  10   1   66.69   40.20 
  -1  10   1  100.39   39.40 
   1  10  -1  123.29   43.60 
  -1  10   1  134.89   42.80 
  -1  10   1   81.59   36.60 
  -1  10   1   48.50   32.80 
  -1  10   1  125.79   40.90 
   1  10  -1   74.89   32.60 
  -1  10   1  134.19   42.20 
  -1  10   1  113.19   45.10 
   1  10  -1   97.69   41.20 
   0 -10  -1    2.30   27.00 
   0 -10  -1   27.00   30.10 
   0 -10   1   13.70   24.00 
   0 -10   1  -12.30   15.70 
   0 -10   1   -3.60   23.90 
   0 -10  -1   29.40   32.00 
   0 -10   1    5.60   28.60 
   0 -10  -1   -4.10   24.70 
   0 -10  -1    6.30   26.40 
   0  10   1   28.30   24.80 
   0  10   1   32.80   26.50 
   0  10   1  -15.90   17.80 
   0  10   1   86.19   33.80 
   0  10   1    2.40   20.70 
   0  10   1   45.40   29.90 
   0  10  -1   -2.20   22.60 
   0  10  -1   46.50   33.40 
   0  10   1    0.70   20.30 
   0  10  -1  -35.00   17.70 
   0  10  -1    9.70   24.80 
   0  10  -1   -2.70   19.40 
   0  10  -1   34.70   27.90 
   0  10  -1   13.00   20.20 
   0  10   1  -13.50   18.60 
  -1 -10  -1  536.75   84.99 
  -1 -10  -1  278.37   59.99 
  -1 -10  -1  313.47   73.49 
  -1 -10  -1  358.36   66.99 
   1 -10   1  474.65   87.09 
  -1 -10  -1  364.36   71.49 
  -1 -10  -1  468.65   78.19 
  -1 -10  -1  345.77   87.89 
   1 -10   1  364.56   91.49 
   1  10   1  535.75   86.59 
   1  10   1  463.85   73.99 
  -1  10  -1  495.65   81.59 
  -1  10  -1  503.45   79.59 
  -1  10  -1  306.27   64.09 
  -1  10  -1  444.26   71.89 
   1  10   1  359.76   72.59 
   1  10   1  291.07   64.39 
   1  10   1  326.27   65.79 
   1  10   1  426.16   74.09 
  -1  10  -1  521.85   74.29 
  -1  10  -1  415.36   75.99 
   1  10   1  543.35   81.29 
   1  10   1  475.15   70.39 
  -1  10  -1  393.66   69.89 
  -2 -10  -1   30.00   33.00 
  -2 -10  -1   29.40   32.60 
  -2 -10  -1   53.99   32.00 
  -2 -10  -1   44.10   33.90 
  -2 -10  -1   34.30   39.10 
  -2 -10  -1   46.10   29.20 
   2 -10   1   31.80   31.60 
  -2 -10  -1   69.29   36.60 
   2  10   1   94.99   41.70 
   2  10   1   42.50   27.70 
  -2  10  -1   64.69   35.50 
  -2  10  -1   25.80   27.70 
  -2  10  -1   53.19   34.50 
   2  10   1   55.09   26.80 
   2  10   1  131.39   49.90 
   2  10   1   56.59   30.20 
   2  10   1   54.99   36.90 
   2  10   1   43.60   30.30 
  -2  10  -1   61.59   33.70 
  -2  10  -1   92.49   34.80 
  10   0  -2  217.88   55.19 
  10   0  -2  251.67   57.39 
 -10   0   2  317.17   73.39 
  10   0  -2  231.08   63.19 
  10   0  -2  293.27   66.59 
 -10   0   2  254.77   57.49 
  10   0  -2  162.78   46.30 
 -10   0   2  140.89   46.90 
  10   0  -2  274.77   62.89 
 -10   0   2  268.37   58.19 
 -10   0   2  150.68   47.30 
  10   0  -2  212.28   53.59 
  10   0  -2  221.18   53.59 
 -10   0   2  316.87   72.49 
 -10   0   2  245.38   51.89 
 -10   0   2  217.28   50.49 
 -10   0   2  248.98   66.49 
   9   0  -2   -2.40   17.80 
   9   0  -2   -2.50   18.10 
   9   0  -2    9.90   22.60 
   9   0  -2    3.20   16.50 
  -9   0   2   -1.30   21.90 
  -9   0   2   13.00   18.40 
   9   0  -2    5.10   14.80 
  -9   0   2  -18.30   13.10 
  -9   0   2   22.00   24.60 
  -9   0   2   -7.20   14.10 
  -9   0   2  -10.50   14.80 
  -9   0   2    3.20   19.00 
   9   0  -2    5.90   21.00 
   9   0  -2   -2.30   19.20 
  -9   0   2    1.20   17.20 
  -9   0   2   12.00   21.50 
   9   0  -2  -17.00   14.10 
  -9   0   2   17.40   24.80 
   8   0  -2 1328.07   97.49 
  -8   0   2 1437.66  103.09 
  -8   0   2 1340.17   91.29 
   8   0  -2 1189.48   91.99 
   8   0  -2 1331.07   92.79 
  -8   0   2 1506.05  113.59 
   8   0  -2 1464.35  104.29 
   8   0  -2 1457.65  106.49 
   8   0  -2 1471.45  105.79 
  -8   0   2 1371.76  109.39 
  -8   0   2 1325.47   87.39 
   8   0  -2 1665.63  109.19 
  -8   0   2 1369.76   93.49 
  -8   0   2 1430.06  109.19 
  -8   0   2 1280.07   83.69 
   8   0  -2 1395.16   88.79 
  -8   0   2 1595.24   83.49 
   8   0  -2 1448.56   86.39 
   8   0  -2 1342.97  111.39 
   8   0  -2 1387.26   99.59 
  -8   0   2 1520.15   99.59 
  -8   0   2 1286.87   80.49 
   7   0  -2   -1.20   12.80 
  -7   0   2   -2.60   15.70 
   7   0  -2    8.00    8.40 
  -7   0   2    5.20   12.60 
  -7   0   2    0.10    9.60 
   7   0  -2   16.60   13.80 
  -7   0   2   32.60   23.80 
   7   0  -2   14.80   16.80 
   7   0  -2   -1.00   13.60 
  -7   0   2   10.60   12.70 
  -7   0   2   -6.00   14.90 
   7   0  -2    1.10   14.50 
   7   0  -2    4.60   10.70 
  -7   0   2   -0.40   13.40 
  -7   0   2   11.60   14.00 
   7   0  -2   -9.90   14.90 
   7   0  -2   -8.70   12.50 
  -7   0   2   -0.90   10.70 
   7   0  -2   27.20   19.10 
  -7   0   2   -3.10   10.40 
   7   0  -2    9.40   14.40 
   7   0  -2   -2.50   11.90 
  -7   0   2    1.60   10.90 
  -7   0   2   -6.40   12.10 
  -6   0   2 2211.58  111.89 
  -6   0   2 2318.27  103.19 
   6   0  -2 2213.98  118.59 
  -6   0   2 2098.99  121.89 
  -6   0   2 2193.48  121.89 
   6   0  -2 2528.65  113.39 
  -6   0   2 2281.37  123.19 
   6   0  -2 2219.78  117.69 
  -6   0   2 1980.50  101.79 
  -6   0   2 2397.66   99.59 
   6   0  -2 2229.88  116.59 
   6   0  -2 2333.27   86.59 
   6   0  -2 2223.68  106.69 
   6   0  -2 2199.48  104.59 
  -6   0   2 2082.69  106.69 
   6   0  -2 2206.58  116.69 
   6   0  -2 2270.77  114.79 
  -6   0   2 2337.17  109.69 
  -6   0   2 2384.66   98.79 
  -6   0   2 2133.99  102.49 
   6   0  -2 2211.48  110.89 
   6   0  -2 2198.88   98.29 
   6   0  -2 2338.57  116.69 
  -6   0   2 2449.45  120.39 
   6   0  -2 2302.27  101.89 
   5   0  -2   -1.20    8.00 
   5   0  -2    8.00   12.00 
  -5   0   2    1.50    7.90 
  -5   0   2   -3.70    7.30 
   5   0  -2   -3.10    8.30 
   5   0  -2    3.50    8.50 
   5   0  -2   -1.30    4.60 
  -5   0   2   -7.10    6.50 
  -5   0   2    0.10    6.60 
   5   0  -2    6.90    4.20 
   5   0  -2   -5.40    6.30 
  -5   0   2   -1.30    6.10 
   5   0  -2   -4.50    7.60 
   5   0  -2   -4.90    8.60 
   5   0  -2   -0.10    8.00 
   5   0  -2   17.40   12.90 
  -5   0   2    3.50    6.40 
  -5   0   2   -0.80   11.10 
  -5   0   2   -0.90    8.40 
  -5   0   2    2.00    9.50 
   5   0  -2   22.80   14.80 
  -5   0   2    6.70    5.20 
   5   0  -2   -4.50    7.10 
   5   0  -2   -0.20    9.30 
  -5   0   2   -1.20    7.50 
  -5   0   2    3.30    5.90 
   5   0  -2   -0.60    8.10 
  -5   0   2    0.00   12.00 
  -4   0   2 7966.50  264.57 
   4   0  -2 7696.63  248.78 
  -4   0   2 7435.46  233.38 
   4   0  -2 7573.44  253.27 
  -4   0   2 7332.67  218.18 
   4   0  -2 7712.13  257.37 
   4   0  -2 7651.13  228.08 
   4   0  -2 7331.87  244.98 
   4   0  -2 7778.42  248.38 
  -4   0   2 7646.14  240.78 
  -4   0   2 7391.86  246.98 
   4   0  -2 7468.55  226.28 
   4   0  -2 7422.36  218.48 
   4   0  -2 7780.62  238.38 
   4   0  -2 7427.86  248.28 
   4   0  -2 7676.83  256.87 
   4   0  -2 7500.55  247.48 
   4   0  -2 7338.27  255.87 
  -4   0   2 7530.85  251.17 
  -4   0   2 7320.77  247.78 
  -4   0   2 7470.25  227.58 
  -4   0   2 7453.85  234.28 
  -4   0   2 7578.64  246.08 
  -4   0   2 7659.23  255.17 
   4   0  -2 7451.55  257.27 
   4   0  -2 7643.14  238.88 
   4   0  -2 7741.33  247.78 
   4   0  -2 7409.66  254.57 
  -4   0   2 7668.03  247.28 
  -4   0   2 7393.86  236.88 
  -4   0   2 7560.94  254.87 
  -3   0   2    5.00    4.90 
  -3   0   2    8.40    5.90 
   3   0  -2    1.40    4.70 
   3   0  -2    1.40    6.00 
  -3   0   2   -3.80    7.40 
  -3   0   2    7.40    7.60 
   3   0  -2    1.30    6.70 
  -3   0   2    4.80    5.80 
  -3   0   2    1.60    6.60 
   3   0  -2    2.60    5.80 
  -3   0   2    1.60    5.80 
  -3   0   2    3.60    6.50 
  -3   0   2   16.00    7.50 
   3   0  -2    2.80    4.50 
  -3   0   2   11.20    4.50 
   3   0  -2   12.20    5.90 
  -3   0   2    3.50    5.10 
   3   0  -2   -2.10    6.30 
  -3   0   2   10.40    8.90 
  -3   0   2    2.30    3.50 
   3   0  -2    3.80    6.20 
   3   0  -2    3.10    7.40 
   3   0  -2    9.60    7.00 
   3   0  -2    7.60    3.90 
   3   0  -2    7.60    7.80 
  -3   0   2    2.70    3.00 
  -3   0   2    2.60    6.90 
   3   0  -2   16.60    9.90 
  -3   0   2   26.60   10.10 
  -3   0   2   11.10    6.90 
   3   0  -2    0.20    5.70 
   3   0  -2    7.80    7.10 
  -3   0   2   -0.90    5.40 
  -3   0   2    3.80    6.00 
   3   0  -2   11.10    8.00 
  -3   0   2   10.90    7.80 
   3   0  -2    4.10    7.30 
   3   0  -2    7.90    4.00 
  -3   0   2   -5.20    5.90 
   3   0  -2    1.90    7.50 
  -3   0   2    7.70    7.60 
   3   0  -2   14.20    6.10 
   3   0  -2   -3.10    7.30 
  -3   0   2    6.00    6.60 
  -2   0   2 7138.49  225.88 
  -2   0   2 7529.05  227.08 
  -2   0   2 7429.16  223.88 
   2   0  -2 7451.85  224.38 
  -2   0   2 7458.55  227.98 
   2   0  -2 7308.77  222.38 
  -2   0   2 7233.88  222.28 
   2   0  -2 7385.76  230.28 
   2   0  -2 6953.10  228.28 
  -2   0   2 7500.65  228.88 
  -2   0   2 7214.98  226.68 
  -2   0   2 7392.36  223.68 
   2   0  -2 7260.07  226.98 
  -2   0   2 7339.57  226.38
[truncated: 2,830,278 more chars]
