# Supplementary material
Source: MDPI journal article supplement (https://www.mdpi.com/2073-4352/13/7/1043)
Supplement: s1 [file s1 › 14 Lu Ha2019_69_0m_a.cif]

 
data_Ha2019_69_0m_a 
  
_audit_creation_method            'SHELXL-2014/7' 
_shelx_SHELXL_version_number      '2014/7' 
_chemical_name_systematic         ? 
_chemical_name_common             ? 
_chemical_melting_point           ? 
_chemical_formula_moiety          ? 
_chemical_formula_sum 
 'C4 H12 Br Lu O7' 
_chemical_formula_weight          427.02 
  
loop_ 
 _atom_type_symbol 
 _atom_type_description 
 _atom_type_scat_dispersion_real 
 _atom_type_scat_dispersion_imag 
 _atom_type_scat_source 
 'C'  'C'   0.0033   0.0016 
 'International Tables Vol C Tables 4.2.6.8 and 6.1.1.4' 
 'H'  'H'   0.0000   0.0000 
 'International Tables Vol C Tables 4.2.6.8 and 6.1.1.4' 
 'O'  'O'   0.0106   0.0060 
 'International Tables Vol C Tables 4.2.6.8 and 6.1.1.4' 
 'Br'  'Br'  -0.2901   2.4595 
 'International Tables Vol C Tables 4.2.6.8 and 6.1.1.4' 
 'Lu'  'Lu'  -0.4720   5.8584 
 'International Tables Vol C Tables 4.2.6.8 and 6.1.1.4' 
  
_space_group_crystal_system       monoclinic 
_space_group_IT_number            14 
_space_group_name_H-M_alt         'P 21/n' 
_space_group_name_Hall            '-P 2yn' 
  
_shelx_space_group_comment 
; 
The symmetry employed for this shelxl refinement is uniquely defined 
by the following loop, which should always be used as a source of 
symmetry information in preference to the above space-group names. 
They are only intended as comments. 
; 
  
loop_ 
 _space_group_symop_operation_xyz 
 'x, y, z' 
 '-x+1/2, y+1/2, -z+1/2' 
 '-x, -y, -z' 
 'x-1/2, -y-1/2, z-1/2' 
  
_cell_length_a                    7.7611(3) 
_cell_length_b                    8.0702(3) 
_cell_length_c                    17.2952(6) 
_cell_angle_alpha                 90 
_cell_angle_beta                  96.098(2) 
_cell_angle_gamma                 90 
_cell_volume                      1077.13(7) 
_cell_formula_units_Z             4 
_cell_measurement_temperature     100(2) 
_cell_measurement_reflns_used     9964 
_cell_measurement_theta_min       2.37 
_cell_measurement_theta_max       27.95 
  
_exptl_crystal_description        prism 
_exptl_crystal_colour             colourless 
_exptl_crystal_density_meas       ? 
_exptl_crystal_density_method     ? 
_exptl_crystal_density_diffrn     2.633 
_exptl_crystal_F_000              792 
_exptl_transmission_factor_min    ? 
_exptl_transmission_factor_max    ? 
_exptl_crystal_size_max           0.408 
_exptl_crystal_size_mid           0.071 
_exptl_crystal_size_min           0.054 
_exptl_absorpt_coefficient_mu     12.879 
_shelx_estimated_absorpt_T_min    0.077 
_shelx_estimated_absorpt_T_max    0.543 
_exptl_absorpt_correction_type    multi-scan 
_exptl_absorpt_correction_T_min   0.326 
_exptl_absorpt_correction_T_max   0.741 
_exptl_absorpt_process_details    'Bruker SADABS' 
_exptl_absorpt_special_details    ? 
_diffrn_ambient_temperature       100(2) 
_diffrn_radiation_wavelength      0.71073 
_diffrn_radiation_type            MoK\a 
_diffrn_source                    ? 
_diffrn_measurement_device_type   'Bruker APEX-II CCD' 
_diffrn_measurement_method        '\f and \w scans' 
_diffrn_detector_area_resol_mean  ? 
_diffrn_reflns_number             103545 
_diffrn_reflns_av_unetI/netI      0.0178 
_diffrn_reflns_av_R_equivalents   0.0735 
_diffrn_reflns_limit_h_min        -10 
_diffrn_reflns_limit_h_max        10 
_diffrn_reflns_limit_k_min        -10 
_diffrn_reflns_limit_k_max        10 
_diffrn_reflns_limit_l_min        -22 
_diffrn_reflns_limit_l_max        22 
_diffrn_reflns_theta_min          2.776 
_diffrn_reflns_theta_max          27.998 
_diffrn_reflns_theta_full         25.242 
_diffrn_measured_fraction_theta_max   0.999 
_diffrn_measured_fraction_theta_full  0.998 
_diffrn_reflns_Laue_measured_fraction_max    0.999 
_diffrn_reflns_Laue_measured_fraction_full   0.998 
_diffrn_reflns_point_group_measured_fraction_max   0.999 
_diffrn_reflns_point_group_measured_fraction_full  0.998 
_reflns_number_total              2596 
_reflns_number_gt                 2317 
_reflns_threshold_expression      'I > 2\s(I)' 
_reflns_Friedel_coverage          0.000 
_reflns_Friedel_fraction_max      . 
_reflns_Friedel_fraction_full     . 
  
_reflns_special_details 
; 
 Reflections were merged by SHELXL according to the crystal 
 class for the calculation of statistics and refinement. 
  
 _reflns_Friedel_fraction is defined as the number of unique 
 Friedel pairs measured divided by the number that would be 
 possible theoretically, ignoring centric projections and 
 systematic absences. 
; 
  
_computing_data_collection        'Bruker APEX2' 
_computing_cell_refinement        'Bruker SAINT' 
_computing_data_reduction         'Bruker SAINT' 
_computing_structure_solution     'SHELXS-97 (Sheldrick 2008)' 
_computing_structure_refinement 'SHELXL-2014/7 (Sheldrick, 2014)' 
_computing_molecular_graphics     'Bruker SHELXTL' 
_computing_publication_material   'Bruker SHELXTL' 
_refine_special_details           ? 
_refine_ls_structure_factor_coef  Fsqd 
_refine_ls_matrix_type            full 
_refine_ls_weighting_scheme       calc 
_refine_ls_weighting_details 
'w=1/[\s^2^(Fo^2^)+(0.0194P)^2^+3.0197P] where P=(Fo^2^+2Fc^2^)/3' 
_atom_sites_solution_primary      direct 
_atom_sites_solution_secondary    ? 
_atom_sites_solution_hydrogens    mixed 
_refine_ls_hydrogen_treatment     constr 
_refine_ls_extinction_method      none 
_refine_ls_extinction_coef        . 
_refine_ls_number_reflns          2596 
_refine_ls_number_parameters      125 
_refine_ls_number_restraints      0 
_refine_ls_R_factor_all           0.0233 
_refine_ls_R_factor_gt            0.0184 
_refine_ls_wR_factor_ref          0.0438 
_refine_ls_wR_factor_gt           0.0417 
_refine_ls_goodness_of_fit_ref    1.055 
_refine_ls_restrained_S_all       1.055 
_refine_ls_shift/su_max           0.003 
_refine_ls_shift/su_mean          0.000 
  
loop_ 
 _atom_site_label 
 _atom_site_type_symbol 
 _atom_site_fract_x 
 _atom_site_fract_y 
 _atom_site_fract_z 
 _atom_site_U_iso_or_equiv 
 _atom_site_adp_type 
 _atom_site_occupancy 
 _atom_site_site_symmetry_order 
 _atom_site_calc_flag 
 _atom_site_refinement_flags_posn 
 _atom_site_refinement_flags_adp 
 _atom_site_refinement_flags_occupancy 
 _atom_site_disorder_assembly 
 _atom_site_disorder_group 
Lu1 Lu 0.27636(2) 0.44353(2) 0.54061(2) 0.01026(5) Uani 1 1 d . . . . . 
Br1 Br 0.38052(5) 0.94617(5) 0.67808(2) 0.01714(8) Uani 1 1 d . . . . . 
O11 O 0.0256(3) 0.3207(3) 0.54296(14) 0.0175(5) Uani 1 1 d . . . . . 
O12 O -0.2583(3) 0.3012(3) 0.52179(13) 0.0131(5) Uani 1 1 d . . . . . 
C11 C -0.1123(4) 0.2425(4) 0.54785(19) 0.0127(6) Uani 1 1 d . . . . . 
C12 C -0.1081(5) 0.0743(5) 0.5846(2) 0.0209(8) Uani 1 1 d . . . . . 
H12A H -0.1873 0.0720 0.6251 0.055(10) Uiso 1 1 calc R U . . . 
H12B H 0.0099 0.0498 0.6078 0.055(10) Uiso 1 1 calc R U . . . 
H12C H -0.1443 -0.0091 0.5450 0.055(10) Uiso 1 1 calc R U . . . 
O21 O 0.5375(3) 0.5552(3) 0.57420(13) 0.0128(5) Uani 1 1 d . . . . . 
O22 O 0.8096(3) 0.6249(3) 0.58991(13) 0.0140(5) Uani 1 1 d . . . . . 
C21 C 0.6732(4) 0.5909(4) 0.61966(19) 0.0124(6) Uani 1 1 d . . . . . 
C22 C 0.6700(5) 0.5868(5) 0.7059(2) 0.0198(8) Uani 1 1 d . . . . . 
H22A H 0.7883 0.5735 0.7312 0.091(15) Uiso 1 1 calc R U . . . 
H22B H 0.5986 0.4936 0.7199 0.091(15) Uiso 1 1 calc R U . . . 
H22C H 0.6211 0.6907 0.7232 0.091(15) Uiso 1 1 calc R U . . . 
O1W O 0.4158(3) 0.1928(3) 0.53265(13) 0.0148(5) Uani 1 1 d . . . . . 
H11W H 0.4113 0.1088 0.5717 0.055(12) Uiso 1 1 d R U . . . 
H12W H 0.5338 0.1932 0.5208 0.055(12) Uiso 1 1 d R U . . . 
O2W O 0.1567(3) 0.6209(3) 0.62470(13) 0.0141(5) Uani 1 1 d . . . . . 
H21W H 0.0361 0.6435 0.6274 0.046(11) Uiso 1 1 d R U . . . 
H22W H 0.2157 0.7204 0.6428 0.046(11) Uiso 1 1 d R U . . . 
O3W O 0.3181(3) 0.3398(3) 0.66742(13) 0.0173(5) Uani 1 1 d . . . . . 
H31W H 0.2672 0.3875 0.7105 0.055(12) Uiso 1 1 d R U . . . 
H32W H 0.3485 0.2288 0.6835 0.055(12) Uiso 1 1 d R U . . . 
  
loop_ 
 _atom_site_aniso_label 
 _atom_site_aniso_U_11 
 _atom_site_aniso_U_22 
 _atom_site_aniso_U_33 
 _atom_site_aniso_U_23 
 _atom_site_aniso_U_13 
 _atom_site_aniso_U_12 
Lu1 0.00768(7) 0.01299(8) 0.01001(7) 0.00035(6) 0.00051(4) -0.00114(5) 
Br1 0.02163(17) 0.01423(17) 0.01555(16) 0.00142(13) 0.00192(12) -0.00255(14) 
O11 0.0135(11) 0.0198(14) 0.0200(12) -0.0031(11) 0.0055(9) -0.0063(10) 
O12 0.0101(10) 0.0130(12) 0.0165(11) 0.0016(9) 0.0026(8) -0.0003(9) 
C11 0.0124(14) 0.0143(17) 0.0119(15) -0.0011(13) 0.0031(12) -0.0016(13) 
C12 0.0173(17) 0.020(2) 0.0251(19) 0.0065(16) 0.0018(14) 0.0013(15) 
O21 0.0089(10) 0.0167(13) 0.0123(11) 0.0000(10) -0.0003(8) -0.0010(9) 
O22 0.0099(10) 0.0189(13) 0.0128(11) 0.0008(10) -0.0005(8) -0.0007(9) 
C21 0.0130(15) 0.0104(17) 0.0137(15) 0.0000(12) 0.0007(12) 0.0021(12) 
C22 0.0201(17) 0.030(2) 0.0091(15) -0.0001(14) -0.0007(13) 0.0022(15) 
O1W 0.0126(11) 0.0174(13) 0.0147(11) 0.0035(10) 0.0029(9) 0.0007(10) 
O2W 0.0119(11) 0.0154(12) 0.0149(11) -0.0015(10) 0.0004(9) -0.0004(9) 
O3W 0.0212(12) 0.0186(13) 0.0127(11) 0.0025(10) 0.0049(9) 0.0019(11) 
  
_geom_special_details 
; 
 All esds (except the esd in the dihedral angle between two l.s. planes) 
 are estimated using the full covariance matrix.  The cell esds are taken 
 into account individually in the estimation of esds in distances, angles 
 and torsion angles; correlations between esds in cell parameters are only 
 used when they are defined by crystal symmetry.  An approximate (isotropic) 
 treatment of cell esds is used for estimating esds involving l.s. planes. 
; 
  
loop_ 
 _geom_bond_atom_site_label_1 
 _geom_bond_atom_site_label_2 
 _geom_bond_distance 
 _geom_bond_site_symmetry_2 
 _geom_bond_publ_flag 
Lu1 O11 2.188(2) . ? 
Lu1 O21 2.238(2) . ? 
Lu1 O2W 2.305(2) . ? 
Lu1 O1W 2.306(2) . ? 
Lu1 O12 2.323(2) 3_566 ? 
Lu1 O3W 2.338(2) . ? 
Lu1 O22 2.350(2) 3_666 ? 
Lu1 O21 2.577(2) 3_666 ? 
Lu1 O11 3.238(3) 3_566 ? 
O11 C11 1.253(4) . ? 
O12 C11 1.266(4) . ? 
C11 C12 1.498(5) . ? 
C12 H12A 0.9800 . ? 
C12 H12B 0.9800 . ? 
C12 H12C 0.9800 . ? 
O21 C21 1.278(4) . ? 
O22 C21 1.255(4) . ? 
C21 C22 1.495(5) . ? 
C22 H22A 0.9800 . ? 
C22 H22B 0.9800 . ? 
C22 H22C 0.9800 . ? 
O1W H11W 0.9600 . ? 
O1W H12W 0.9600 . ? 
O2W H21W 0.9600 . ? 
O2W H22W 0.9600 . ? 
O3W H31W 0.9600 . ? 
O3W H32W 0.9600 . ? 
  
loop_ 
 _geom_angle_atom_site_label_1 
 _geom_angle_atom_site_label_2 
 _geom_angle_atom_site_label_3 
 _geom_angle 
 _geom_angle_site_symmetry_1 
 _geom_angle_site_symmetry_3 
 _geom_angle_publ_flag 
O11 Lu1 O21 163.82(9) . . ? 
O11 Lu1 O2W 81.43(9) . . ? 
O21 Lu1 O2W 90.02(9) . . ? 
O11 Lu1 O1W 91.57(9) . . ? 
O21 Lu1 O1W 87.21(9) . . ? 
O2W Lu1 O1W 143.68(8) . . ? 
O11 Lu1 O12 113.61(9) . 3_566 ? 
O21 Lu1 O12 76.80(8) . 3_566 ? 
O2W Lu1 O12 74.57(8) . 3_566 ? 
O1W Lu1 O12 139.13(8) . 3_566 ? 
O11 Lu1 O3W 81.67(9) . . ? 
O21 Lu1 O3W 82.49(8) . . ? 
O2W Lu1 O3W 69.84(9) . . ? 
O1W Lu1 O3W 73.90(9) . . ? 
O12 Lu1 O3W 138.50(9) 3_566 . ? 
O11 Lu1 O22 75.48(9) . 3_666 ? 
O21 Lu1 O22 120.05(8) . 3_666 ? 
O2W Lu1 O22 131.26(8) . 3_666 ? 
O1W Lu1 O22 79.85(8) . 3_666 ? 
O12 Lu1 O22 76.41(8) 3_566 3_666 ? 
O3W Lu1 O22 144.47(9) . 3_666 ? 
O11 Lu1 O21 126.06(8) . 3_666 ? 
O21 Lu1 O21 68.41(9) . 3_666 ? 
O2W Lu1 O21 141.28(8) . 3_666 ? 
O1W Lu1 O21 69.66(8) . 3_666 ? 
O12 Lu1 O21 69.49(8) 3_566 3_666 ? 
O3W Lu1 O21 133.73(8) . 3_666 ? 
O22 Lu1 O21 52.12(7) 3_666 3_666 ? 
O11 Lu1 O11 70.82(10) . 3_566 ? 
O21 Lu1 O11 118.16(8) . 3_566 ? 
O2W Lu1 O11 66.15(7) . 3_566 ? 
O1W Lu1 O11 144.21(7) . 3_566 ? 
O12 Lu1 O11 42.81(7) 3_566 3_566 ? 
O3W Lu1 O11 130.60(7) . 3_566 ? 
O22 Lu1 O11 65.87(7) 3_666 3_566 ? 
O21 Lu1 O11 95.29(7) 3_666 3_566 ? 
Lu1 Lu1 Lu1 133.329(7) 3_666 3_566 ? 
C11 O11 Lu1 175.6(3) . . ? 
C11 O12 Lu1 120.3(2) . 3_566 ? 
O11 C11 O12 121.7(3) . . ? 
O11 C11 C12 120.3(3) . . ? 
O12 C11 C12 117.9(3) . . ? 
C11 C12 H12A 109.5 . . ? 
C11 C12 H12B 109.5 . . ? 
H12A C12 H12B 109.5 . . ? 
C11 C12 H12C 109.5 . . ? 
H12A C12 H12C 109.5 . . ? 
H12B C12 H12C 109.5 . . ? 
C21 O21 Lu1 156.2(2) . . ? 
C21 O21 Lu1 88.88(19) . 3_666 ? 
Lu1 O21 Lu1 111.59(9) . 3_666 ? 
C21 O22 Lu1 100.2(2) . 3_666 ? 
O22 C21 O21 118.2(3) . . ? 
O22 C21 C22 121.2(3) . . ? 
O21 C21 C22 120.6(3) . . ? 
C21 C22 H22A 109.5 . . ? 
C21 C22 H22B 109.5 . . ? 
H22A C22 H22B 109.5 . . ? 
C21 C22 H22C 109.5 . . ? 
H22A C22 H22C 109.5 . . ? 
H22B C22 H22C 109.5 . . ? 
Lu1 O1W H11W 121.7 . . ? 
Lu1 O1W H12W 118.3 . . ? 
H11W O1W H12W 105.0 . . ? 
Lu1 O2W H21W 127.5 . . ? 
Lu1 O2W H22W 121.1 . . ? 
H21W O2W H22W 105.0 . . ? 
Lu1 O3W H31W 123.8 . . ? 
Lu1 O3W H32W 127.7 . . ? 
H31W O3W H32W 105.0 . . ? 
  
loop_ 
 _geom_hbond_atom_site_label_D 
 _geom_hbond_atom_site_label_H 
 _geom_hbond_atom_site_label_A 
 _geom_hbond_distance_DH 
 _geom_hbond_distance_HA 
 _geom_hbond_distance_DA 
 _geom_hbond_angle_DHA 
 _geom_hbond_site_symmetry_A 
O1W H11W Br1  0.96 2.29 3.242(2) 169.4 1_545 
O1W H12W O12  0.96 1.83 2.702(3) 149.2 1_655 
O2W H21W O22  0.96 1.81 2.698(3) 151.6 1_455 
O2W H22W Br1  0.96 2.27 3.228(2) 173.4 . 
O3W H31W Br1  0.96 2.39 3.336(2) 167.6 2_546 
O3W H32W Br1  0.96 2.30 3.216(3) 159.9 1_545 
  
_refine_diff_density_max    1.131 
_refine_diff_density_min   -1.209 
_refine_diff_density_rms    0.147 
  
_shelx_res_file 
; 
  
    Ha2019_69_0m_a.res created by SHELXL-2014/7 
  
  
TITL Ha2019_69_0m_a.res in P2(1)/n 
CELL  0.71073   7.7611   8.0702  17.2952   90.000   96.098   90.000 
ZERR    4.000   0.0003   0.0003   0.0006    0.000    0.002    0.000 
LATT 1 
SYMM 1/2-X, 1/2+Y, 1/2-Z 
SFAC C  H  O  Br Lu 
UNIT 16 48 28 4 4 
LIST 4 ! automatically inserted. Change 6 to 4 for CHECKCIF!! 
OMIT 0 0 2 
OMIT 1 0 1 
OMIT 0 1 1 
OMIT -3 56 
L.S. 10 
ACTA 
BOND $H 
rem DFIX 0.96  0.0001 O1w H11w O1w H12w O2w H21w O2w H22w O3w H31w O3w H32w 
rem dfix 1.523  0.0001 H11w H12w H21w H22w H31w H32w 
FREE Lu1 C21_$6 
EQIV $6 1-x, 1-y, 1-z 
BIND Lu1 Lu1_$6 
BIND Lu1 Lu1_$7 
EQIV $7 -x,1-y,1-z 
BIND Lu1 O11_$7 
ACTA 
HTAB 
EQIV $1 -x+3/2, y-1/2, -z+3/2 
EQIV $2 x, y-1, z 
HTAB O1W Br1_$2 
EQIV $3 x+1, y, z 
HTAB O1W O12_$3 
EQIV $4 x-1, y, z 
HTAB O2W O22_$4 
HTAB O2W Br1 
EQIV $5 -x+1/2, y-1/2, -z+3/2 
HTAB O3W Br1_$5 
HTAB O3W Br1_$2 
SIZE 0.054  0.071 0.408 
BOND $H 
FMAP 2 
PLAN 5 
TEMP -173 
WGHT    0.019400    3.019700 
FVAR       0.08933   0.05495   0.09149   0.05501   0.04600   0.05510 
LU1   5    0.276365    0.443528    0.540606    11.00000    0.00768    0.01299 = 
         0.01001    0.00035    0.00051   -0.00114 
BR1   4    0.380524    0.946165    0.678080    11.00000    0.02163    0.01423 = 
         0.01555    0.00142    0.00192   -0.00255 
O11   3    0.025621    0.320704    0.542959    11.00000    0.01354    0.01980 = 
         0.02003   -0.00313    0.00552   -0.00629 
O12   3   -0.258312    0.301225    0.521788    11.00000    0.01013    0.01302 = 
         0.01647    0.00160    0.00262   -0.00030 
C11   1   -0.112340    0.242508    0.547848    11.00000    0.01241    0.01426 = 
         0.01188   -0.00107    0.00314   -0.00159 
C12   1   -0.108138    0.074286    0.584609    11.00000    0.01731    0.02034 = 
         0.02506    0.00647    0.00179    0.00127 
AFIX 137 
H12A  2   -0.187259    0.072044    0.625146    11.00000   21.00000 
H12B  2    0.009877    0.049820    0.607768    11.00000   21.00000 
H12C  2   -0.144284   -0.009058    0.544963    11.00000   21.00000 
AFIX   0 
O21   3    0.537523    0.555238    0.574202    11.00000    0.00891    0.01672 = 
         0.01235    0.00004   -0.00034   -0.00095 
O22   3    0.809606    0.624855    0.589908    11.00000    0.00985    0.01892 = 
         0.01279    0.00081   -0.00049   -0.00073 
C21   1    0.673222    0.590894    0.619661    11.00000    0.01304    0.01038 = 
         0.01372   -0.00003    0.00066    0.00215 
C22   1    0.670032    0.586817    0.705922    11.00000    0.02009    0.02979 = 
         0.00905   -0.00014   -0.00065    0.00222 
AFIX 137 
H22A  2    0.788339    0.573470    0.731189    11.00000   31.00000 
H22B  2    0.598588    0.493615    0.719928    11.00000   31.00000 
H22C  2    0.621077    0.690692    0.723190    11.00000   31.00000 
AFIX   0 
O1W   3    0.415751    0.192776    0.532647    11.00000    0.01258    0.01744 = 
         0.01469    0.00349    0.00291    0.00068 
AFIX   3 
H11W  2    0.411350    0.108765    0.571686    11.00000   41.00000 
H12W  2    0.533833    0.193182    0.520815    11.00000   41.00000 
AFIX   0 
O2W   3    0.156747    0.620907    0.624696    11.00000    0.01189    0.01539 = 
         0.01489   -0.00153    0.00043   -0.00040 
AFIX   3 
H21W  2    0.036098    0.643477    0.627436    11.00000   51.00000 
H22W  2    0.215659    0.720385    0.642847    11.00000   51.00000 
AFIX   0 
O3W   3    0.318083    0.339811    0.667423    11.00000    0.02122    0.01858 = 
         0.01266    0.00252    0.00491    0.00188 
AFIX   3 
H31W  2    0.267154    0.387490    0.710487    11.00000   61.00000 
H32W  2    0.348499    0.228797    0.683482    11.00000   61.00000 
AFIX   0 
HKLF 4 
  
REM  Ha2019_69_0m_a.res in P2(1)/n 
REM R1 =  0.0184 for    2317 Fo > 4sig(Fo)  and  0.0233 for all    2596 data 
REM    125 parameters refined using      0 restraints 
  
END 
  
WGHT      0.0194      3.0197 
  
REM Instructions for potential hydrogen bonds 
HTAB C12 Br1_$2 
HTAB C22 Br1_$1 
HTAB C22 O3W 
HTAB C22 Br1 
HTAB O1W Br1_$2 
HTAB O1W O12_$3 
HTAB O2W O22_$4 
HTAB O2W Br1 
HTAB O3W Br1_$5 
HTAB O3W Br1_$2 
  
REM Highest difference peak  1.131,  deepest hole -1.209,  1-sigma level  0.147 
Q1    1   0.1641  0.4434  0.5374  11.00000  0.05    1.13 
Q2    1   0.3929  0.4466  0.5453  11.00000  0.05    1.04 
Q3    1   0.2076  0.5702  0.5480  11.00000  0.05    0.75 
Q4    1   0.3848  0.3172  0.5445  11.00000  0.05    0.74 
Q5    1   0.1759  0.3251  0.5186  11.00000  0.05    0.60 
; 
_shelx_res_checksum    7696 
  
_shelx_hkl_file 
; 
  -1   0   0   -0.09    0.22 
   1   0   0    0.40    0.32 
   1   0   0    1.03    0.37 
   1   0   0    0.07    0.29 
  -1   0   0    0.06    0.24 
   1   0   0    0.66    0.31 
  -1   0   0    0.30    0.25 
  -1   0   0   -0.01    0.14 
   1   0   0    0.17    0.22 
  -1   0   0    0.06    0.21 
  -1   0   0   -0.22    0.25 
   1   0   0    0.60    0.23 
  -1   0   0    0.21    0.22 
   1   0   0    0.02    0.18 
   1   0   0    0.19    0.30 
  -1   0   0    0.39    0.26 
  -1   0   0    0.44    0.30 
   1   0   0   -0.03    0.17 
  -1   0   0    0.85    0.30 
  -1   0   0    0.60    0.19 
  -1   0   0    0.59    0.30 
   1   0   0    0.40    0.37 
  -1   0   0    0.57    0.22 
  -1   0   0    1.03    0.36 
  -1   0   0   -0.20    0.16 
   1   0   0    0.40    0.24 
  -1   0   0    0.47    0.20 
   1   0   0   -0.17    0.15 
  -1   0   0    0.12    0.28 
  -1   0   0    0.22    0.21 
  -2   0   0  509.31   32.91 
  -2   0   0  474.34   32.60 
   2   0   0  518.62   33.14 
  -2   0   0  471.34   32.56 
  -2   0   0  524.21   32.95 
  -2   0   0  496.89   32.82 
   2   0   0  530.78   32.87 
   2   0   0  501.30   32.77 
  -2   0   0  523.18   32.69 
  -2   0   0  528.08   32.89 
   2   0   0  532.33   32.65 
   2   0   0  512.63   32.81 
   2   0   0  493.81   32.84 
  -2   0   0  473.87   32.79 
   2   0   0  500.43   32.81 
   2   0   0  498.92   32.92 
  -2   0   0  524.04   32.76 
   2   0   0  493.06   32.59 
   2   0   0  455.27   32.93 
  -2   0   0  521.24   32.86 
   2   0   0  485.50   32.84 
   2   0   0  519.37   32.75 
   2   0   0  503.05   32.56 
  -2   0   0  496.05   32.76 
  -2   0   0  523.86   32.84 
   2   0   0  513.46   32.84 
   2   0   0  520.37   32.89 
   2   0   0  491.59   32.96 
   2   0   0  497.87   32.79 
  -2   0   0  504.41   32.80 
  -2   0   0  507.68   32.81 
  -2   0   0  443.47   32.76 
   2   0   0  512.65   32.82 
  -2   0   0  511.56   32.79 
   2   0   0  497.67   32.76 
  -2   0   0  511.70   32.81 
   2   0   0  503.69   32.80 
  -2   0   0  525.76   32.54 
  -2   0   0  487.40   32.95 
   2   0   0  496.94   32.67 
   2   0   0  515.17   32.79 
  -2   0   0  531.96   33.14 
   2   0   0  504.09   32.79 
  -2   0   0  497.28   32.97 
  -2   0   0  517.73   32.64 
  -2   0   0  521.27   32.81 
   2   0   0  501.22   32.79 
  -2   0   0  465.21   32.73 
   3   0   0   -0.05    0.67 
  -3   0   0    1.39    0.97 
  -3   0   0   -0.39    0.62 
   3   0   0   -0.16    0.78 
  -3   0   0   -0.66    0.83 
  -3   0   0   -0.07    0.80 
   3   0   0    0.48    0.72 
   3   0   0   -0.21    0.50 
  -3   0   0   -0.21    0.68 
  -3   0   0   -0.07    0.61 
  -3   0   0   -1.14    0.55 
  -3   0   0    0.39    0.87 
  -3   0   0   -0.05    0.56 
   3   0   0   -0.67    0.80 
   3   0   0    0.26    0.78 
  -3   0   0    0.08    0.75 
  -3   0   0   -0.02    0.58 
   3   0   0    1.61    0.90 
   3   0   0   -0.44    0.70 
  -3   0   0   -0.32    1.02 
   3   0   0   -0.30    0.71 
  -3   0   0    0.38    0.38 
   3   0   0   -0.32    0.67 
  -3   0   0    0.17    0.71 
   3   0   0   -0.10    1.26 
  -3   0   0   -0.20    0.58 
   3   0   0    0.49    0.54 
   3   0   0   -0.85    0.76 
   3   0   0    0.03    0.77 
  -3   0   0    0.31    0.53 
  -3   0   0    0.23    0.78 
   3   0   0   -0.24    0.74 
  -3   0   0   -0.70    0.59 
   3   0   0    0.51    0.89 
   3   0   0   -0.33    0.40 
   3   0   0    0.25    0.77 
   3   0   0    0.42    0.85 
  -3   0   0    0.67    0.83 
   3   0   0   -0.07    0.46 
   3   0   0   -0.49    0.80 
   3   0   0    1.27    0.72 
  -3   0   0    0.05    0.85 
   4   0   0   45.05    3.80 
  -4   0   0   41.19    3.77 
  -4   0   0   47.20    4.14 
   4   0   0   41.10    4.81 
  -4   0   0   39.91    3.28 
  -4   0   0   41.14    3.42 
  -4   0   0   46.97    3.98 
  -4   0   0   47.89    3.90 
   4   0   0   43.01    3.69 
   4   0   0   42.27    3.74 
  -4   0   0   44.63    3.90 
   4   0   0   43.16    3.74 
   4   0   0   39.65    3.19 
   4   0   0   43.21    3.81 
   4   0   0   45.30    3.84 
   4   0   0   42.49    3.65 
   4   0   0   44.96    3.33 
   4   0   0   43.36    3.10 
  -4   0   0   50.06    3.97 
   4   0   0   49.79    4.01 
  -4   0   0   41.45    3.01 
   4   0   0   45.64    3.80 
   4   0   0   40.32    3.91 
   4   0   0   37.53    3.97 
   4   0   0   40.68    3.69 
   4   0   0   44.82    3.83 
   4   0   0   34.15    3.32 
  -4   0   0   41.16    4.17 
   5   0   0    0.69    1.34 
   5   0   0   -1.54    0.93 
   5   0   0    0.09    1.29 
   5   0   0   -1.65    1.17 
   5   0   0    0.23    1.03 
  -5   0   0    1.57    1.57 
   5   0   0    1.04    1.26 
  -5   0   0   -0.03    0.71 
   5   0   0    0.50    1.16 
   5   0   0    0.36    1.10 
  -5   0   0   -0.21    1.26 
  -5   0   0    0.88    0.84 
  -5   0   0   -0.17    1.29 
  -5   0   0   -1.31    1.39 
   5   0   0   -2.20    0.96 
  -5   0   0   -1.07    1.20 
   5   0   0    0.84    1.08 
   5   0   0    0.20    1.04 
  -5   0   0    0.83    1.32 
   5   0   0   -0.74    1.72 
  -5   0   0   -0.61    1.13 
  -5   0   0    0.43    0.45 
   5   0   0    0.38    0.71 
   5   0   0   -0.38    0.56 
  -5   0   0   -0.79    1.37 
   5   0   0    1.81    1.22 
   5   0   0    0.17    0.77 
  -5   0   0   -1.60    1.11 
   5   0   0    0.67    0.64 
  -5   0   0   -1.16    1.09 
  -6   0   0   63.61    5.41 
   6   0   0   63.13    5.03 
   6   0   0   66.82    4.98 
   6   0   0   70.45    5.82 
  -6   0   0   62.59    5.54 
   6   0   0   61.96    5.52 
  -6   0   0   56.09    5.58 
  -6   0   0   65.19    4.96 
  -6   0   0   69.60    6.09 
  -6   0   0   62.63    5.71 
  -6   0   0   69.42    5.68 
   6   0   0   61.49    5.34 
  -6   0   0   57.21    5.76 
   6   0   0   61.29    5.89 
  -6   0   0   69.52    5.77 
   6   0   0   62.30    5.50 
  -6   0   0   60.86    6.12 
  -6   0   0   53.92    4.63 
   6   0   0   70.33    5.45 
   6   0   0   61.07    5.49 
   6   0   0   62.93    5.24 
   6   0   0   65.29    5.45 
   6   0   0   56.33    5.41 
  -6   0   0   54.21    5.83 
   6   0   0   52.51    5.23 
   6   0   0   61.91    4.78 
   6   0   0   56.14    5.32 
   7   0   0   -0.48    1.33 
   7   0   0   -0.92    1.57 
   7   0   0    1.60    1.74 
   7   0   0    2.32    1.95 
  -7   0   0    2.08    2.53 
  -7   0   0    0.11    1.71 
  -7   0   0    3.02    2.01 
   7   0   0   -2.84    1.31 
  -7   0   0   -0.23    1.88 
   7   0   0   -0.43    1.56 
   7   0   0   -0.18    1.49 
   7   0   0   -0.74    1.57 
  -7   0   0   -0.61    1.54 
  -7   0   0   -0.09    0.95 
   7   0   0   -1.48    1.91 
   7   0   0    0.10    1.39 
  -7   0   0    2.63    2.01 
   7   0   0   -2.10    1.59 
   7   0   0    2.95    1.57 
  -7   0   0   -0.21    1.16 
  -7   0   0    1.59    2.03 
  -7   0   0   -0.38    1.84 
   7   0   0   -1.07    1.65 
  -7   0   0    0.00    2.27 
  -7   0   0   -3.30    1.88 
   7   0   0    1.57    2.07 
   8   0   0   38.44    4.88 
   8   0   0   39.47    4.55 
   8   0   0   37.06    4.65 
  -8   0   0   37.79    4.83 
  -8   0   0   31.73    4.22 
   8   0   0   35.82    4.73 
   8   0   0   35.80    4.76 
  -8   0   0   41.14    5.27 
  -8   0   0   41.54    5.48 
   8   0   0   38.36    4.47 
  -8   0   0   34.52    4.83 
   8   0   0   27.21    4.19 
   8   0   0   40.05    4.89 
   8   0   0   36.16    4.00 
  -8   0   0   40.38    5.66 
  -8   0   0   46.28    5.16 
  -8   0   0   40.80    6.00 
   8   0   0   29.23    4.95 
  -8   0   0   31.88    5.09 
  -8   0   0   34.04    5.44 
  -8   0   0   42.50    5.13 
   8   0   0   35.41    4.44 
   8   0   0   32.24    4.43 
   9   0   0    0.24    1.99 
   9   0   0   -3.52    1.91 
   9   0   0    1.61    2.58 
   9   0   0   -1.14    2.37 
   9   0   0   -4.34    3.32 
  -9   0   0    1.35    3.06 
  -9   0   0    3.46    2.61 
   9   0   0    0.24    2.38 
  -9   0   0   -1.31    2.78 
  -9   0   0   -0.72    2.37 
   9   0   0    0.34    1.88 
  -9   0   0    1.06    2.95 
   9   0   0   -4.33    2.02 
  -9   0   0    0.42    2.00 
  -9   0   0    1.61    2.75 
  -9   0   0   -3.23    2.26 
  -9   0   0    0.28    2.47 
   9   0   0   -0.44    2.08 
  -9   0   0    0.63    2.36 
  -9   0   0    3.03    2.55 
   9   0   0   -1.24    2.12 
   9   0   0   -0.86    1.86 
  10   0   0    1.38    2.82 
  10   0   0    2.57    2.52 
 -10   0   0   -1.03    3.48 
 -10   0   0    5.42    3.28 
 -10   0   0    1.91    3.44 
  10   0   0    2.85    2.23 
  10   0   0   -1.33    2.45 
 -10   0   0    0.36    2.63 
  10   0   0    1.04    2.45 
 -10   0   0    0.31    3.36 
 -10   0   0    5.59    3.06 
  10   0   0   -0.42    2.46 
 -10   0   0    1.43    3.05 
 -10   0   0    4.66    3.23 
 -10   0   0    6.28    3.08 
  10   0   0   -4.67    3.53 
 -10   0   0    7.33    3.60 
 -10   0   0    5.03    3.34 
  10   0   0    2.81    2.87 
  10   0   0    1.85    2.87 
   0  -1   0    0.98    0.66 
   0  -1   0    0.16    0.20 
   0  -1   0   -0.16    0.60 
   0  -1   0    0.03    0.63 
   0  -1   0    0.17    0.31 
   0  -1   0    0.09    0.26 
   0  -1   0    1.08    0.68 
   0  -1   0    2.26    0.75 
   0  -1   0    0.90    0.76 
   0  -1   0    0.36    0.51 
   0  -1   0    1.47    0.44 
   0  -1   0    0.91    0.90 
   0  -1   0    1.03    0.68 
   0  -1   0    0.53    0.23 
   0   1   0   -0.14    0.21 
   0   1   0    0.80    0.33 
   0   1   0    0.03    0.42 
   0   1   0   -0.01    0.18 
  -1  -1   0    3.10    0.77 
  -1  -1   0    3.37    0.58 
   1  -1   0    3.26    0.77 
  -1  -1   0    2.60    0.66 
   1  -1   0    3.92    0.69 
  -1  -1   0    3.70    0.78 
   1  -1   0    2.44    0.71 
   1  -1   0    3.31    0.72 
  -1  -1   0    3.00    0.62 
  -1  -1   0    2.86    0.64 
   1  -1   0    2.69    0.60 
   1  -1   0    3.06    0.74 
  -1  -1   0    3.54    0.76 
  -1  -1   0    2.35    0.56 
   1  -1   0    3.19    0.79 
   1  -1   0    3.72    0.81 
   1  -1   0    3.37    0.80 
   1  -1   0    2.00    0.61 
  -1  -1   0    3.17    0.59 
   1  -1   0    2.56    0.83 
  -1  -1   0    2.38    0.61 
  -1  -1   0    3.27    0.44 
  -1  -1   0    4.36    0.78 
  -1  -1   0    2.51    0.64 
   1  -1   0    2.67    0.65 
  -1  -1   0    2.99    0.64 
   1  -1   0    3.21    0.66 
   1  -1   0    3.03    0.69 
   1  -1   0    4.23    0.76 
  -1  -1   0    3.78    0.58 
  -1  -1   0    3.13    0.86 
   1  -1   0    2.55    0.66 
   1  -1   0    2.73    0.50 
   1  -1   0    2.47    0.81 
  -1  -1   0    3.58    0.65 
  -1  -1   0    3.27    0.46 
  -1  -1   0    2.89    0.61 
  -1  -1   0    4.31    0.70 
  -1  -1   0    2.93    0.67 
   1  -1   0    4.32    0.55 
   1  -1   0    3.12    0.53 
  -1   1   0    2.93    0.66 
   1   1   0    3.26    0.89 
  -1   1   0    2.97    0.59 
   1   1   0    2.78    0.73 
   1   1   0    2.46    0.61 
  -1   1   0    2.60    0.56 
  -1   1   0    4.01    0.76 
  -1   1   0    2.98    0.62 
  -1   1   0    2.28    0.66 
  -1   1   0    4.85    0.78 
   1   1   0    3.79    0.82 
  -1   1   0    2.94    0.67 
   1   1   0    3.01    0.60 
   1   1   0    4.09    0.65 
  -1   1   0    2.70    0.69 
   1   1   0    2.59    0.65 
   1   1   0    4.28    0.72 
  -1   1   0    2.16    0.90 
  -1   1   0    2.70    0.78 
  -1   1   0    1.17    0.59 
  -1   1   0    2.60    0.68 
   1   1   0    4.21    0.68 
   1   1   0    4.02    0.77 
  -1   1   0    2.05    0.42 
  -1   1   0    2.46    0.56 
   1   1   0    3.62    0.67 
   1   1   0    3.64    0.59 
   1   1   0    2.89    0.68 
   1   1   0    2.65    0.63 
   1   1   0    2.26    0.71 
  -1   1   0    3.70    0.79 
  -1   1   0    2.94    0.82 
   1   1   0    4.17    0.76 
  -1   1   0    3.59    0.89 
  -1   1   0    3.51    0.67 
  -2  -1   0   39.09    3.04 
   2  -1   0   38.98    2.94 
  -2  -1   0   40.65    2.89 
  -2  -1   0   40.31    2.93 
  -2  -1   0   36.20    3.10 
  -2  -1   0   39.44    3.23 
  -2  -1   0   38.48    3.26 
  -2  -1   0   39.14    2.90 
  -2  -1   0   39.94    2.87 
  -2  -1   0   38.42    3.16 
   2  -1   0   43.50    3.23 
   2  -1   0   40.64    3.14 
   2  -1   0   43.52    3.12 
   2  -1   0   41.01    3.11 
   2  -1   0   40.24    3.15 
  -2  -1   0   37.64    2.94 
   2  -1   0   35.53    3.16 
  -2  -1   0   40.32    2.99 
  -2  -1   0   38.69    2.91 
  -2  -1   0   40.83    3.07 
  -2  -1   0   37.66    2.79 
   2  -1   0   40.34    2.92 
   2  -1   0   53.04    3.80 
  -2  -1   0   34.39    2.95 
  -2  -1   0   41.06    3.04 
   2  -1   0   39.19    3.31 
   2  -1   0   36.58    2.86 
   2  -1   0   37.40    3.11 
   2  -1   0   41.26    3.05 
   2  -1   0   38.55    3.10 
   2  -1   0   38.84    2.91 
   2  -1   0   38.13    3.04 
   2  -1   0   40.45    3.06 
  -2  -1   0   37.81    3.50 
  -2  -1   0   38.86    2.95 
  -2  -1   0   39.36    3.14 
  -2  -1   0   40.37    3.05 
  -2  -1   0   41.15    3.07 
   2  -1   0   36.41    3.09 
   2  -1   0   41.64    2.87 
   2  -1   0   40.21    3.25 
   2  -1   0   32.88    3.13 
   2  -1   0   37.15    3.01 
  -2  -1   0   42.02    3.17 
  -2  -1   0   37.91    3.19 
   2  -1   0   40.03    3.28 
   2  -1   0   41.05    3.13 
  -2   1   0   40.50    2.85 
  -2   1   0   40.41    3.08 
  -2   1   0   41.34    3.05 
  -2   1   0   38.79    3.21 
   2   1   0   37.50    3.17 
   2   1   0   42.58    3.10 
  -2   1   0   37.97    3.02 
  -2   1   0   36.34    2.94 
   2   1   0   41.81    3.02 
   2   1   0   38.54    3.08 
  -2   1   0   36.71    3.14 
  -2   1   0   40.96    3.07 
   2   1   0   41.11    2.95 
   2   1   0   40.17    2.89 
   2   1   0   40.57    2.84 
   2   1   0   43.03    3.09 
  -2   1   0   39.65    2.99 
   2   1   0   37.65    2.78 
  -2   1   0   38.96    3.10 
   2   1   0   39.04    2.97 
   2   1   0   42.15    2.89 
   2   1   0   36.56    3.04 
  -2   1   0   49.20    3.63 
  -2   1   0   40.63    3.39 
   2   1   0   39.66    3.11 
  -2   1   0   41.28    3.22 
   2   1   0   41.96    3.26 
  -2   1   0   40.47    3.10 
  -2   1   0   40.96    2.94 
  -2   1   0   36.93    3.02 
  -2   1   0   36.28    3.10 
  -2   1   0   41.10    3.10 
  -2   1   0   37.21    2.92 
   2   1   0   43.10    2.95 
  -2   1   0   40.11    3.27 
  -2   1   0   37.53    3.10 
   2   1   0   38.42    3.17 
   2   1   0   39.80    3.06 
   2   1   0   42.46    3.15 
  -2   1   0   36.28    3.29 
   2   1   0   40.36    2.95 
   2   1   0   34.96    3.03 
  -2   1   0   40.69    3.17 
  -2   1   0   38.04    3.15 
  -2   1   0   38.10    2.86 
   2   1   0   39.59    2.87 
  -2   1   0   39.05    2.91 
   3  -1   0   17.58    2.03 
   3  -1   0   15.95    1.94 
  -3  -1   0   15.53    2.02 
   3  -1   0   16.39    1.95 
   3  -1   0   22.27    2.28 
   3  -1   0   15.34    1.96 
  -3  -1   0   17.33    1.84 
   3  -1   0   18.04    1.75 
  -3  -1   0   15.54    2.14 
   3  -1   0   17.63    1.80 
   3  -1   0   17.77    1.97 
  -3  -1   0   15.86    1.89 
   3  -1   0   15.42    2.10 
   3  -1   0   17.89    2.13 
  -3  -1   0   18.26    1.61 
  -3  -1   0   14.13    1.79 
   3  -1   0   18.99    1.74 
  -3  -1   0   14.72    1.80 
  -3  -1   0   17.44    1.67 
   3  -1   0   14.13    1.90 
   3  -1   0   14.68    1.86 
  -3  -1   0   17.71    2.20 
  -3  -1   0   18.13    2.06 
  -3  -1   0   14.08    1.98 
  -3  -1   0   16.63    2.13 
  -3  -1   0   16.42    1.84 
  -3  -1   0   15.69    1.77 
  -3  -1   0   14.89    1.78 
  -3  -1   0   14.59    1.97 
  -3  -1   0   18.38    1.92 
   3  -1   0   18.64    2.22 
   3  -1   0   14.09    2.08 
   3  -1   0   15.49    2.10 
   3  -1   0   15.92    1.63 
  -3  -1   0   18.09    2.33 
   3  -1   0   13.44    1.80 
   3  -1   0   12.66    2.42 
   3  -1   0   16.28    1.96 
   3  -1   0   18.08    2.02 
  -3  -1   0   17.58    1.81 
  -3   1   0   15.32    2.02 
  -3   1   0   20.25    2.25 
  -3   1   0   15.84    1.60 
  -3   1   0   14.23    1.96 
  -3   1   0   13.87    2.13 
   3   1   0   18.42    2.01 
   3   1   0   14.27    1.47 
  -3   1   0   15.40    1.81 
  -3   1   0   11.70    2.03 
  -3   1   0   18.99    2.18 
   3   1   0   18.15    1.92 
  -3   1   0   18.12    1.94 
  -3   1   0   15.72    2.37 
   3   1   0   17.89    1.90 
   3   1   0   14.39    1.88 
  -3   1   0   16.52    1.67 
   3   1   0   18.57    2.28 
   3   1   0   18.49    2.12 
   3   1   0   17.26    1.96 
   3   1   0   18.69    2.04 
  -3   1   0   16.37    2.21 
   3   1   0   18.07    1.82 
   3   1   0   13.14    1.83 
  -3   1   0   15.03    1.93 
   3   1   0   18.75    2.03 
  -3   1   0   13.86    1.90 
  -3   1   0   18.27    2.01 
   3   1   0   15.39    1.87 
  -3   1   0   12.15    2.09 
   3   1   0   14.15    1.87 
   3   1   0   17.76    1.63 
  -3   1   0   15.53    1.66 
  -3   1   0   17.55    2.02 
  -3   1   0   14.69    1.87 
  -3   1   0   18.40    1.90 
   3   1   0   16.71    1.78 
  -3   1   0   17.02    1.86 
  -3   1   0   17.01    1.67 
   3   1   0   18.00    2.27 
   4  -1   0   15.12    2.40 
   4  -1   0   22.96    2.70 
   4  -1   0   19.18    2.76 
  -4  -1   0   24.28    2.32 
   4  -1   0   22.47    2.59 
  -4  -1   0   22.06    2.86 
  -4  -1   0   24.25    3.04 
   4  -1   0   24.50    2.76 
   4  -1   0   23.61    2.20 
   4  -1   0   23.88    2.54 
  -4  -1   0   22.33    2.46 
   4  -1   0   26.68    3.05 
   4  -1   0   23.23    2.64 
   4  -1   0   20.56    2.12 
  -4  -1   0   18.87    2.85 
  -4  -1   0   24.26    2.34 
  -4  -1   0   18.53    2.25 
  -4  -1   0   24.06    2.80 
   4  -1   0   19.29    2.53 
   4  -1   0   19.74    2.54 
   4  -1   0   23.46    2.71 
   4  -1   0   25.10    2.30 
  -4  -1   0   29.80    2.84 
   4  -1   0   21.10    2.11 
  -4  -1   0   21.12    2.06 
   4  -1   0   23.83    2.84 
  -4  -1   0   19.23    2.60 
  -4  -1   0   22.04    2.65 
   4  -1   0   20.79    3.43 
   4  -1   0   16.81    2.47 
   4  -1   0   21.05    2.49 
   4   1   0   24.49    2.36 
  -4   1   0   21.75    2.65 
  -4   1   0   19.71    2.71 
  -4   1   0   20.02    2.10 
   4   1   0   24.91    2.45 
  -4   1   0   23.77    3.08 
   4   1   0   18.95    1.89 
   4   1   0   21.88    2.63 
  -4   1   0   26.32    3.36 
   4   1   0   21.58    2.49 
   4   1   0   22.09    2.51 
   4   1   0   23.53    2.66 
  -4   1   0   20.31    2.04 
  -4   1   0   22.52    2.62 
  -4   1   0   21.28    3.07 
  -4   1   0   19.73    2.05 
  -4   1   0   21.59    2.81 
   4   1   0   25.59    2.72 
   4   1   0   23.85    2.11 
   4   1   0   22.15    2.54 
   4   1   0   20.14    2.44 
  -4   1   0   18.90    2.13 
  -4   1   0   22.63    2.94 
   4   1   0   28.54    2.78 
   4   1   0   23.57    3.00 
   4   1   0   23.74    2.70 
   5  -1   0  285.40   19.26 
  -5  -1   0  293.34   19.11 
   5  -1   0  292.04   19.10 
  -5  -1   0  274.82   18.63 
  -5  -1   0  282.48   19.72 
  -5  -1   0  285.34   18.68 
   5  -1   0  263.70   18.71 
   5  -1   0  277.07   19.31 
   5  -1   0  273.67   19.65 
   5  -1   0  271.45   20.02 
  -5  -1   0  284.54   19.49 
   5  -1   0  279.99   19.04 
   5  -1   0  298.87   19.22 
   5  -1   0  287.37   19.49 
   5  -1   0  271.15   18.78 
   5  -1   0  285.04   19.17 
  -5  -1   0  277.79   18.92 
   5  -1   0  274.98   19.26 
   5  -1   0  289.30   19.17 
  -5  -1   0  281.44   19.41 
   5  -1   0  286.11   18.84 
  -5  -1   0  276.97   18.90 
   5  -1   0  262.98   19.43 
   5  -1   0  285.75   19.30 
   5  -1   0  271.56   19.20 
  -5  -1   0  295.11   19.39 
   5  -1   0  280.55   19.26 
   5  -1   0  288.12   19.22 
  -5  -1   0  302.80   19.42 
  -5  -1   0  261.38   19.15 
  -5  -1   0  280.01   19.55 
  -5   1   0  268.79   18.77 
   5   1   0  288.69   19.31 
   5   1   0  267.43   19.14 
   5   1   0  279.74   19.27 
  -5   1   0  296.63   18.82 
  -5   1   0  290.14   19.28 
   5   1   0  283.94   19.33 
  -5   1   0  292.77   19.86 
   5   1   0  302.38   19.23 
  -5   1   0  292.61   19.40 
   5   1   0  287.39   19.09 
   5   1   0  278.42   19.16 
  -5   1   0  274.12   19.23 
   5   1   0  295.92   18.75 
   5   1   0  279.51   19.23 
  -5   1   0  282.26   18.64 
   5   1   0  290.80   19.18 
  -5   1   0  280.54   19.74 
   5   1   0  277.77   18.98 
   5   1   0  289.86   18.89 
  -5   1   0  261.75   19.79 
  -5   1   0  288.27   18.71 
  -5   1   0  272.99   19.45 
  -5   1   0  298.67   19.36 
   5   1   0  252.45   19.57 
   5   1   0  287.40   19.14 
  -5   1   0  280.59   19.51 
   5   1   0  298.69   19.31 
   6  -1   0   20.37    3.15 
  -6  -1   0   28.38    3.34 
   6  -1   0   17.77    3.96 
  -6  -1   0   27.15    3.83 
   6  -1   0   21.52    3.11 
  -6  -1   0   26.23    3.40 
  -6  -1   0   25.25    3.14 
  -6  -1   0   20.18    2.60 
   6  -1   0   29.31    3.26 
  -6  -1   0   23.81    3.53 
   6  -1   0   25.40    3.14 
   6  -1   0   21.53    3.33 
   6  -1   0   24.69    3.40 
   6  -1   0   20.89    2.95 
   6  -1   0   26.90    3.29 
   6  -1   0   20.75    3.42 
   6  -1   0   21.88    3.01 
   6  -1   0   20.26    2.36 
   6  -1   0   15.85    2.86 
   6  -1   0   26.52    3.31 
   6  -1   0   23.96    3.10 
  -6  -1   0   25.21    3.69 
  -6  -1   0   17.00    3.00 
  -6  -1   0   22.54    2.68 
  -6  -1   0   20.25    3.19 
   6   1   0   21.65    3.16 
  -6   1   0   26.60    3.34 
   6   1   0   22.20    3.29 
   6   1   0   20.99    3.19 
   6   1   0   18.06    2.90 
   6   1   0   22.41    3.01 
  -6   1   0   25.80    4.06 
  -6   1   0   23.80    3.58 
  -6   1   0   28.64    3.40 
   6   1   0   19.60    2.88 
   6   1   0   24.28    3.11 
  -6   1   0   20.19    3.58 
  -6   1   0   20.84    2.44 
   6   1   0   21.91    3.47 
   6   1   0   24.13    2.69 
   6   1   0   24.51    2.46 
  -6   1   0   15.54    3.23 
   6   1   0   24.57    3.22 
  -6   1   0   24.03    2.18 
  -6   1   0   17.29    3.04 
  -6   1   0   25.89    3.33 
  -6   1   0   20.65    3.28 
   6   1   0   30.06    3.14 
   6   1   0   20.60    2.04 
  -6   1   0   17.31    2.32 
   6   1   0   24.33    3.06 
   6   1   0   20.13    3.09 
  -7  -1   0  182.93   13.74 
   7  -1   0  196.49   14.29 
  -7  -1   0  195.11   15.05 
   7  -1   0  169.13   13.97 
   7  -1   0  198.18   14.20 
   7  -1   0  203.75   14.40 
   7  -1   0  206.02   14.23 
  -7  -1   0  198.39   13.69 
   7  -1   0  203.69   14.18 
   7  -1   0  188.75   14.33 
  -7  -1   0  198.00   14.81 
  -7  -1   0  198.54   14.30 
  -7  -1   0  203.22   14.51 
   7  -1   0  202.23   14.32 
   7  -1   0  187.97   14.28 
   7  -1   0  196.01   14.12 
   7  -1   0  195.31   15.60 
  -7  -1   0  195.69   14.52 
  -7  -1   0  185.33   14.02 
   7  -1   0  207.61   14.70 
  -7  -1   0  199.54   14.56 
   7  -1   0  190.75   13.69 
  -7  -1   0  201.83   14.82 
   7  -1   0  200.94   15.02 
   7   1   0  190.67   14.48 
  -7   1   0  212.94   14.56 
   7   1   0  197.04   14.06 
  -7   1   0  196.54   13.51 
  -7   1   0  214.83   14.59 
   7   1   0  193.11   14.18 
   7   1   0  200.39   14.32 
   7   1   0  184.48   14.32 
   7   1   0  206.87   14.24 
  -7   1   0  195.59   14.29 
   7   1   0  201.91   14.43 
  -7   1   0  196.69   14.67 
   7   1   0  194.56   13.91 
   7   1   0  184.11   14.82 
  -7   1   0  192.68   15.24 
   7   1   0  199.44   14.37 
  -7   1   0  199.72   14.82 
   7   1   0  194.51   14.08 
  -7   1   0  198.12   13.52 
  -7   1   0  192.92   14.56 
  -7   1   0  199.41   14.49 
  -7   1   0  198.93   15.03 
  -7   1   0  185.37   15.07 
   7   1   0  199.97   13.69 
   8  -1   0   11.81    2.66 
   8  -1   0    9.87    2.77 
  -8  -1   0   15.68    3.35 
   8  -1   0   15.75    3.06 
  -8  -1   0   14.19    3.56 
   8  -1   0   14.74    3.72 
  -8  -1   0   13.83    3.40 
  -8  -1   0   14.23    3.31 
   8  -1   0   11.46    2.83 
  -8  -1   0   11.85    3.48 
   8  -1   0   17.00    3.20 
  -8  -1   0   10.10    3.35 
  -8  -1   0   11.28    3.38 
  -8  -1   0   18.66    2.77 
   8  -1   0   13.18    2.60 
   8  -1   0   12.93    3.09 
  -8  -1   0   15.79    2.41 
  -8  -1   0   17.54    3.15 
  -8  -1   0   15.75    3.39 
   8  -1   0   12.53    2.89 
   8  -1   0   20.02    3.26 
   8  -1   0   14.65    3.01 
   8  -1   0   16.52    3.29 
   8   1   0   20.81    3.72 
  -8   1   0   12.84    3.99 
   8   1   0   14.97    3.11 
  -8   1   0   16.45    4.02 
   8   1   0    9.13    2.64 
  -8   1   0   13.76    3.43 
  -8   1   0   13.63    3.14 
  -8   1   0   14.10    3.57 
   8   1   0   19.70    3.48 
  -8   1   0   10.15    3.29 
   8   1   0   12.42    2.57 
  -8   1   0   15.50    3.96 
   8   1   0   13.54    2.91 
   8   1   0   12.72    2.82 
   8   1   0   19.47    3.15 
  -8   1   0   15.67    3.75 
   8   1   0   12.79    2.91 
  -8   1   0   18.35    3.47 
  -8   1   0    7.74    2.88 
  -8   1   0   18.65    3.51 
  -8   1   0   11.45    3.15 
  -9  -1   0   49.72    6.58 
   9  -1   0   47.30    5.87 
   9  -1   0   60.97    7.52 
  -9  -1   0   54.90    6.57 
  -9  -1   0   46.19    6.06 
   9  -1   0   55.11    6.02 
  -9  -1   0   60.41    6.22 
   9  -1   0   42.92    6.00 
  -9  -1   0   41.03    6.67 
  -9  -1   0   65.68    6.81 
  -9  -1   0   40.10    6.32 
  -9  -1   0   59.36    7.27 
   9  -1   0   49.35    5.90 
   9  -1   0   60.26    6.05 
   9  -1   0   47.12    5.60 
  -9  -1   0   47.36    5.94 
   9  -1   0   41.99    5.71 
   9  -1   0   47.19    5.65 
   9   1   0   48.03    5.44 
   9   1   0   49.93    5.60 
  -9   1   0   51.14    6.85 
   9   1   0   41.21    7.22 
   9   1   0   40.99    5.47 
  -9   1   0   54.71    6.41 
   9   1   0   52.87    6.27 
  -9   1   0   61.53    6.79 
  -9   1   0   41.21    5.71 
   9   1   0   54.47    6.18 
  -9   1   0   62.49    6.72 
   9   1   0   52.98    5.89 
   9   1   0   48.63    6.03 
   9   1   0   44.58    5.79 
  -9   1   0   61.81    6.86 
  -9   1   0   48.17    7.34 
  -9   1   0   58.00    7.04 
  -9   1   0   46.52    6.39 
  -9   1   0   64.55    6.30 
  -9   1   0   46.63    7.11 
   9   1   0   37.46    5.37 
  -9   1   0   48.78    6.56 
 -10  -1   0    3.03    3.70 
  10  -1   0    0.71    2.48 
  10  -1   0    1.55    2.23 
  10  -1   0    2.79    2.74 
 -10  -1   0    3.40    3.32 
  10  -1   0    1.57    3.38 
 -10  -1   0    3.82    2.71 
  10  -1   0    0.54    2.87 
 -10  -1   0    2.71    3.46 
 -10  -1   0    2.93    3.43 
 -10  -1   0    1.97    3.35 
 -10  -1   0    1.13    3.26 
 -10  -1   0    5.51    3.48 
  10  -1   0   -1.78    2.43 
 -10  -1   0    7.98    3.15 
  10  -1   0   -0.69    3.61 
 -10  -1   0    5.18    3.11 
 -10   1   0    2.01    3.30 
 -10   1   0    2.02    3.62 
 -10   1   0    9.82    3.35 
  10   1   0    0.96    2.55 
 -10   1   0   -2.58    2.61 
 -10   1   0    1.46    3.04 
 -10   1   0    2.95    3.54 
  10   1   0    2.59    2.41 
  10   1   0   -0.46    2.98 
  10   1   0    4.51    2.61 
 -10   1   0   -2.29    2.99 
 -10   1   0    0.70    2.41 
  10   1   0    3.57    2.85 
 -10   1   0    7.76    3.28 
 -10   1   0    8.56    3.52 
 -10   1   0   -0.85    3.49 
  10   1   0    3.52    4.35 
  10   1   0   -2.06    2.10 
 -10   1   0    4.28    3.30 
   0  -2   0  418.04   30.97 
   0  -2   0  468.75   30.99 
   0  -2   0  510.81   30.50 
   0  -2   0  443.40   30.95 
   0  -2   0  444.07   31.14 
   0  -2   0  509.45   30.50 
   0  -2   0  458.58   30.54 
   0  -2   0  485.41   30.20 
   0  -2   0  473.61   30.46 
   0  -2   0  479.98   30.43 
   0  -2   0  470.11   30.47 
   0  -2   0  494.94   30.45 
   0  -2   0  408.35   31.93 
   0  -2   0  425.35   30.52 
   0  -2   0  388.21   31.15 
   0  -2   0  484.09   31.07 
   0   2   0  492.73   30.46 
   0   2   0  476.92   30.39 
   0   2   0  480.73   31.77 
   0   2   0  466.64   30.49 
   0   2   0  454.21   31.17 
   0   2   0  497.16   30.50 
   0   2   0  464.98   30.42 
   0   2   0  410.88   30.71 
   0   2   0  465.12   30.89 
   0   2   0  474.95   30.34 
   0   2   0  479.55   30.18 
   0   2   0  467.01   30.55 
  -1  -2   0  499.59   33.58 
   1  -2   0  543.22   33.99 
   1  -2   0  528.81   33.25 
  -1  -2   0  516.22   33.65 
   1  -2   0  533.83   33.42 
  -1  -2   0  527.11   33.57 
   1  -2   0  553.32   33.79 
  -1  -2   0  497.00   33.47 
   1  -2   0  526.30   33.79 
  -1  -2   0  493.84   33.20 
  -1  -2   0  482.40   33.42 
  -1  -2   0  507.08   33.35 
  -1  -2   0  518.56   33.22 
   1  -2   0  537.05   34.04 
   1  -2   0  556.71   33.88 
  -1  -2   0  522.19   33.38 
  -1  -2   0  517.41   33.40 
  -1  -2   0  544.35   33.48 
   1  -2   0  504.77   33.36 
  -1  -2   0  478.11   33.39 
   1  -2   0  498.81   33.41 
  -1  -2   0  488.47   33.20 
   1  -2   0  530.73   33.42 
   1  -2   0  510.20   33.66 
  -1  -2   0  509.49   33.27 
  -1  -2   0  500.87   33.42 
  -1  -2   0  512.14   33.40 
  -1  -2   0  509.54   33.40 
  -1  -2   0  503.88   33.32 
   1  -2   0  529.24   33.40 
   1  -2   0  483.52   33.35 
  -1  -2   0  520.51   33.47 
   1  -2   0  510.00   33.31 
  -1  -2   0  484.98   33.24 
   1  -2   0  484.08   33.76 
   1  -2   0  589.43   34.08 
   1  -2   0  535.97   33.58 
   1  -2   0  526.83   33.87 
  -1  -2   0  526.66   33.41 
   1  -2   0  506.61   33.59 
  -1   2   0  528.44   33.42 
  -1   2   0  466.70   33.35 
  -1   2   0  507.55   33.39 
   1   2   0  528.28   33.45 
   1   2   0  483.53   33.17 
   1   2   0  536.05   33.44 
   1   2   0  493.21   33.42 
   1   2   0  485.92   33.44 
   1   2   0  523.68   33.33 
   1   2   0  517.34   33.24 
   1   2   0  497.21   33.36 
  -1   2   0  447.99   33.83 
  -1   2   0  550.14   33.61 
   1   2   0  495.78   33.61 
   1   2   0  499.24   33.10 
   1   2   0  516.31   33.40 
  -1   2   0  487.62   33.80 
  -1   2   0  499.22   33.58 
  -1   2   0  507.91   33.53 
  -1   2   0  552.00   33.84 
   1   2   0  514.47   33.43 
   1   2   0  523.60   33.47 
  -1   2   0  524.86   33.41 
  -1   2   0  534.20   33.99 
  -1   2   0  510.65   33.30 
  -1   2   0  510.70   33.36 
  -1   2   0  516.49   33.55 
  -1   2   0  491.97   33.56 
  -1   2   0  514.15   33.31 
  -1   2   0  485.78   33.97 
  -1   2   0  511.11   33.39 
  -1   2   0  505.33   33.33 
   1   2   0  490.77   33.07 
   1   2   0  518.08   33.27 
   1   2   0  526.41   33.34 
  -1   2   0  508.94   33.85 
  -1   2   0  494.27   33.28 
   1   2   0  509.68   33.24 
   1   2   0  468.54   32.99 
  -1   2   0  496.94   33.35 
   1   2   0  507.20   33.65 
   2  -2   0  185.62   12.19 
   2  -2   0  179.56   11.80 
  -2  -2   0  182.73   12.46 
   2  -2   0  174.89   12.09 
   2  -2   0  182.52   12.20 
  -2  -2   0  178.68   12.12 
   2  -2   0  172.84   12.11 
  -2  -2   0  184.71   12.14 
  -2  -2   0  184.46   11.94 
  -2  -2   0  181.42   11.95 
   2  -2   0  184.10   12.10 
   2  -2   0  172.28   12.31 
   2  -2   0  183.47   12.04 
  -2  -2   0  180.47   11.90 
  -2  -2   0  193.90   12.01 
   2  -2   0  176.33   12.40 
  -2  -2   0  180.07   11.94 
  -2  -2   0  181.88   11.91 
  -2  -2   0  185.46   12.00 
   2  -2   0  185.63   12.09 
  -2  -2   0  180.40   11.98 
   2  -2   0  185.28   11.80 
   2  -2   0  154.05   12.23 
  -2  -2   0  182.48   12.28 
  -2  -2   0  185.01   12.27 
  -2  -2   0  171.94   11.74 
   2  -2   0  185.19   12.34 
  -2  -2   0  169.10   11.67 
   2  -2   0  177.18   12.17 
  -2  -2   0  171.38   11.98 
  -2  -2   0  178.96   12.17 
  -2  -2   0  176.24   12.04 
  -2  -2   0  179.09   12.23 
   2  -2   0  160.31   12.25 
   2  -2   0  160.25   12.28 
   2  -2   0  190.04   12.18 
   2  -2   0  185.31   12.20 
   2  -2   0  174.83   12.08 
  -2  -2   0  170.28   12.08 
   2  -2   0  171.01   11.73 
  -2  -2   0  185.80   11.96 
   2  -2   0  179.13   12.06 
   2  -2   0  179.16   11.91 
  -2  -2   0  161.09   11.97 
   2  -2   0  168.44   12.13 
  -2   2   0  169.41   12.00 
   2   2   0  173.72   11.67 
  -2   2   0  170.28   12.04 
  -2   2   0  171.17   12.29 
   2   2   0  170.36   11.90 
   2   2   0  179.62   12.17 
  -2   2   0  180.44   12.06 
  -2   2   0  189.23   12.04 
   2   2   0  176.91   11.95 
  -2   2   0  175.98   12.05 
  -2   2   0  152.99   12.14 
  -2   2   0  193.06   12.24 
  -2   2   0  178.08   12.12 
   2   2   0  184.30   12.15 
  -2   2   0  178.69   11.85 
   2   2   0  182.49   11.85 
  -2   2   0  176.70   12.14 
  -2   2   0  179.65   11.76 
  -2   2   0  180.37   12.44 
  -2   2   0  166.68   12.04 
   2   2   0  181.96   11.99 
   2   2   0  184.23   11.76 
   2   2   0  188.71   12.07 
   2   2   0  168.72   11.96 
   2   2   0  187.50   11.92 
   2   2   0  181.47   12.07 
  -2   2   0  195.21   12.61 
  -2   2   0  194.62   12.62 
  -2   2   0  167.56   12.24 
   2   2   0  184.48   11.74 
   2   2   0  179.68   12.15 
  -2   2   0  178.05   12.12 
   2   2   0  181.13   12.09 
  -2   2   0  174.98   12.03 
  -2   2   0  185.10   12.43 
   2   2   0  183.23   12.05 
   2   2   0  178.60   12.03 
  -2   2   0  177.47   12.25 
  -2   2   0  170.56   12.13 
   2   2   0  174.24   12.25 
   2   2   0  188.54   11.92 
  -3  -2   0   47.62    3.60 
  -3  -2   0   48.22    4.03 
  -3  -2   0   41.59    3.27 
   3  -2   0   51.72    4.16 
   3  -2   0   43.74    4.14 
   3  -2   0   46.35    4.03 
   3  -2   0   49.77    3.83 
   3  -2   0   48.49    4.08 
  -3  -2   0   47.79    3.90 
   3  -2   0   47.35    3.59 
   3  -2   0   44.53    3.56 
   3  -2   0   44.18    4.06 
   3  -2   0   46.48    4.25 
   3  -2   0   47.81    3.75 
  -3  -2   0   43.44    3.59 
   3  -2   0   46.16    3.94 
   3  -2   0   48.87    4.05 
  -3  -2   0   53.72    4.13 
  -3  -2   0   42.24    3.54 
  -3  -2   0   48.80    4.18 
  -3  -2   0   46.40    3.62 
   3  -2   0   47.00    3.92 
  -3  -2   0   45.37    4.03 
  -3  -2   0   45.01    3.45 
  -3  -2   0   47.67    3.86 
   3  -2   0   43.50    3.81 
  -3  -2   0   46.71    3.86 
  -3  -2   0   47.12    4.29 
  -3  -2   0   44.94    3.53 
  -3   2   0   43.70    4.10 
   3   2   0   45.45    3.91 
  -3   2   0   40.93    4.44 
   3   2   0   45.19    4.02 
  -3   2   0   44.00    3.42 
  -3   2   0   37.98    4.10 
   3   2   0   47.92    3.91 
   3   2   0   47.46    3.63 
   3   2   0   46.38    3.51 
   3   2   0   45.67    3.66 
  -3   2   0   48.12    4.65 
   3   2   0   52.76    4.03 
  -3   2   0   44.44    3.56 
  -3   2   0   43.70    3.91 
  -3   2   0   44.16    3.58 
  -3   2   0   50.16    3.69 
  -3   2   0   43.69    4.11 
   3   2   0   52.64    3.74 
  -3   2   0   55.39    4.61 
   3   2   0   48.32    3.75 
   3   2   0   45.24    3.73 
  -3   2   0   43.19    4.28 
  -3   2   0   49.06    4.16 
  -3   2   0   37.58    3.69 
   3   2   0   54.70    3.79 
  -3   2   0   39.15    3.75 
  -3   2   0   38.40    3.71 
   3   2   0   43.86    3.48 
  -3   2   0   43.81    3.97 
  -3   2   0   44.22    3.74 
   3   2   0   54.05    4.04 
   3   2   0   45.22    4.24 
  -4  -2   0   19.31    2.89 
   4  -2   0   19.42    2.52 
   4  -2   0   23.67    2.90 
  -4  -2   0   17.66    2.57 
   4  -2   0   21.25    2.61 
  -4  -2   0   17.68    2.40 
  -4  -2   0   19.77    2.22 
   4  -2   0   19.66    2.53 
  -4  -2   0   22.67    2.59 
   4  -2   0   24.07    2.36 
  -4  -2   0   17.51    2.68 
   4  -2   0   20.20    2.63 
   4  -2   0   21.21    2.17 
   4  -2   0   26.27    3.55 
  -4  -2   0   18.55    2.17 
  -4  -2   0   21.68    2.80 
  -4  -2   0   20.78    2.06 
   4  -2   0   15.77    2.55 
   4  -2   0   21.21    2.76 
   4  -2   0   23.56    2.42 
  -4  -2   0   18.54    1.89 
   4  -2   0   20.47    2.19 
  -4  -2   0   20.91    2.17 
   4  -2   0   16.18    2.72 
  -4  -2   0   17.56    2.25 
  -4  -2   0   17.11    2.43 
   4  -2   0   19.37    2.48 
  -4  -2   0   23.10    2.78 
   4   2   0   21.55    2.62 
   4   2   0   20.79    1.83 
  -4   2   0   17.84    2.57 
  -4   2   0   17.16    2.12 
   4   2   0   23.00    2.47 
  -4   2   0   19.83    2.78 
   4   2   0   19.79    2.53 
   4   2   0   16.23    2.39 
   4   2   0   19.86    2.17 
   4   2   0   19.70    2.30 
   4   2   0   20.91    2.58 
   4   2   0   20.35    2.21 
  -4   2   0   19.97    2.80 
  -4   2   0   25.71    3.16 
  -4   2   0   20.83    2.59 
  -4   2   0   18.73    2.97 
   4   2   0   19.70    1.97 
   4   2   0   18.13    2.52 
  -4   2   0   15.80    2.09 
  -4   2   0   19.74    2.52 
  -4   2   0   18.81    2.71 
  -4   2   0   18.44    2.01 
  -4   2   0   17.80    2.98 
  -4   2   0   22.39    2.12 
   4   2   0   22.35    2.42 
   4   2   0   18.49    2.23 
  -4   2   0   21.66    2.33 
   4   2   0   22.53    2.43 
   5  -2   0   18.30    2.33 
  -5  -2   0   19.44    2.12 
  -5  -2   0   19.55    2.77 
   5  -2   0   22.38    2.75 
  -5  -2   0   20.81    3.00 
  -5  -2   0   15.45    2.65 
   5  -2   0   14.89    2.68 
   5  -2   0   19.32    2.73 
   5  -2   0   18.03    2.84 
  -5  -2   0   17.52    1.98 
  -5  -2   0   17.93    3.07 
   5  -2   0   17.60    2.63 
  -5  -2   0   19.16    2.63 
   5  -2   0   19.95    2.93 
  -5  -2   0   20.28    2.46 
   5  -2   0   19.86    2.69 
  -5  -2   0   19.97    2.36 
  -5  -2   0   18.54    2.90 
   5  -2   0   20.00    3.55 
   5  -2   0   21.38    2.48 
  -5  -2   0   21.50    3.07 
   5  -2   0   17.62    2.57 
   5  -2   0   15.48    2.82 
   5   2   0   16.25    2.50 
   5   2   0   21.18    2.45 
  -5   2   0   21.13    2.82 
   5   2   0   15.83    2.61 
  -5   2   0   22.21    3.08 
   5   2   0   16.75    2.33 
  -5   2   0   19.62    2.35 
   5   2   0   18.34    2.70 
  -5   2   0   22.10    3.30 
   5   2   0   29.21    3.09 
   5   2   0   16.99    2.49 
  -5   2   0   19.27    2.88 
  -5   2   0   16.58    3.04 
   5   2   0   15.69    1.85 
   5   2   0   23.99    2.72 
   5   2   0   18.03    2.63 
   5   2   0   16.66    2.46 
   5   2   0   20.05    2.15 
  -5   2   0   19.15    2.67 
  -5   2   0   17.05    2.90 
  -5   2   0   21.65    2.91 
  -5   2   0   17.95    2.06 
  -5   2   0   20.16    3.41 
   6  -2   0   29.79    3.81 
   6  -2   0   31.94    3.33 
   6  -2   0   35.17    3.69 
   6  -2   0   29.70    3.43 
  -6  -2   0   30.01    3.86 
  -6  -2   0   37.10    3.60 
  -6  -2   0   31.93    3.78 
   6  -2   0   30.61    3.99 
  -6  -2   0   28.92    3.00 
   6  -2   0   32.53    3.91 
   6  -2   0   31.51    3.93 
  -6  -2   0   38.10    4.53 
  -6  -2   0   31.95    3.36 
  -6  -2   0   30.98    4.41 
   6  -2   0   32.50    4.41 
  -6  -2   0   32.76    4.29 
  -6  -2   0   31.60    2.88 
  -6  -2   0   32.41    4.09 
   6  -2   0   36.96    5.34 
  -6  -2   0   27.09    3.78 
   6  -2   0   25.18    3.82 
   6  -2   0   35.61    3.95 
   6  -2   0   30.23    3.80 
   6  -2   0   31.73    3.76 
   6   2   0   35.17    3.76 
   6   2   0   25.96    3.58 
  -6   2   0   35.30    4.12 
   6   2   0   27.78    3.08 
  -6   2   0   31.60    3.31 
  -6   2   0   32.30    4.30 
  -6   2   0   35.37    4.20 
   6   2   0   31.37    3.82 
   6   2   0   26.51    3.67 
   6   2   0   28.43    3.96 
   6   2   0   33.57    4.02 
  -6   2   0   31.72    3.08 
  -6   2   0   27.50    4.37 
  -6   2   0   34.04    3.99 
   6   2   0   35.03    3.44 
   6   2   0   31.53    3.50 
  -6   2   0   25.90    3.90 
   6   2   0   34.23    3.50 
  -6   2   0   29.39    4.70 
   6   2   0   35.70    3.97 
  -6   2   0   30.33    4.40 
   6   2   0   31.22    3.67 
  -6   2   0   29.96    3.90 
  -6   2   0   28.08    3.95 
   6   2   0   31.27    3.76 
   6   2   0   29.06    3.22 
   7  -2   0   13.43    2.75 
   7  -2   0    7.62    2.83 
   7  -2   0   10.07    2.08 
  -7  -2   0   13.64    2.80 
  -7  -2   0   10.07    1.87 
   7  -2   0    9.77    2.65 
   7  -2   0   12.32    2.95 
  -7  -2   0   13.03    3.11 
  -7  -2   0   12.81    3.09 
  -7  -2   0    9.26    2.57 
   7  -2   0   11.32    2.46 
   7  -2   0   12.62    2.62 
   7  -2   0    8.42    2.41 
  -7  -2   0   11.10    2.60 
   7  -2   0   10.31    2.60 
   7  -2   0   15.35    3.18 
   7  -2   0    5.67    2.13 
  -7  -2   0   10.59    2.25 
  -7  -2   0   10.81    3.06 
   7  -2   0    9.61    2.48 
   7  -2   0   13.26    3.88 
  -7  -2   0    5.61    1.81 
  -7  -2   0   10.66    2.78 
   7   2   0    8.22    2.72 
   7   2   0    8.49    2.52 
   7   2   0    7.35    2.30 
  -7   2   0   10.58    3.37 
  -7   2   0    8.57    3.38 
  -7   2   0    6.33    2.57 
   7   2   0   11.42    2.68 
   7   2   0    8.48    2.34 
  -7   2   0   10.64    3.14 
  -7   2   0   12.62    2.92 
   7   2   0   12.85    2.92 
  -7   2   0   10.30    3.24 
  -7   2   0    9.56    2.59 
   7   2   0   10.55    2.66 
   7   2   0    9.22    2.23 
  -7   2   0    4.33    2.59 
   7   2   0   11.81    2.28 
   7   2   0    7.81    2.11 
  -7   2   0   14.32    3.09 
  -7   2   0   11.33    2.92 
  -7   2   0    9.72    1.84 
  -7   2   0   11.06    2.05 
   7   2   0   13.63    2.67 
  -8  -2   0   18.14    2.82 
   8  -2   0   20.31    3.92 
   8  -2   0   20.31    3.56 
  -8  -2   0   24.68    3.62 
  -8  -2   0   13.46    3.95 
  -8  -2   0   20.37    4.24 
  -8  -2   0   20.89    3.77 
  -8  -2   0   18.51    3.62 
   8  -2   0   16.76    3.41 
  -8  -2   0   17.13    3.73 
   8  -2   0   21.92    3.96 
  -8  -2   0   18.15    3.72 
   8  -2   0   20.33    3.46 
  -8  -2   0   27.73    4.57 
   8  -2   0   21.21    5.15 
   8  -2   0   27.52    3.61 
  -8  -2   0   18.67    3.63 
   8  -2   0   20.84    3.53 
   8  -2   0   25.77    3.85 
   8  -2   0   24.50    4.59 
   8   2   0   15.53    3.13 
  -8   2   0   26.08    4.07 
   8   2   0   25.11    3.99 
  -8   2   0   18.02    4.15 
   8   2   0   19.17    3.83 
  -8   2   0   18.43    3.73 
  -8   2   0   21.59    4.80 
   8   2   0   16.94    2.93 
  -8   2   0   21.20    4.42 
   8   2   0   19.52    3.19 
  -8   2   0   17.48    3.66 
  -8   2   0   15.68    4.23 
   8   2   0   24.56    5.07 
  -8   2   0   28.97    4.51 
   8   2   0   27.08    4.12 
  -8   2   0   23.06    4.24 
   8   2   0   21.72    3.47 
  -8   2   0   19.01    3.78 
   8   2   0   16.34    3.49 
   8   2   0   22.86    3.60 
   9  -2   0   -0.54    2.25 
   9  -2   0   -1.22    2.72 
   9  -2   0   -0.25    2.20 
   9  -2   0    2.17    2.34 
  -9  -2   0   -1.32    2.42 
   9  -2   0    0.07    2.00 
  -9  -2   0    3.03    2.53 
  -9  -2   0    0.68    2.57 
   9  -2   0    1.05    2.26 
  -9  -2   0    0.73    2.61 
  -9  -2   0   -5.94    1.84 
  -9  -2   0    2.99    2.87 
  -9  -2   0    4.73    2.72 
  -9  -2   0   -2.04    2.89 
  -9  -2   0    0.27    2.66 
   9  -2   0   -1.24    2.53 
   9  -2   0    0.41    2.39 
  -9  -2   0    0.81    2.21 
  -9   2   0   -0.76    2.38 
  -9   2   0   -3.73    2.45 
  -9   2   0   -2.39    2.46 
   9   2   0    2.18    1.94 
  -9   2   0    0.97    2.58 
   9   2   0    0.37    2.70 
  -9   2   0   -0.26    2.88 
  -9   2   0   -2.73    2.73 
   9   2   0   -2.02    3.36 
   9   2   0    1.75    2.22 
   9   2   0    1.61    2.32 
   9   2   0    3.03    2.40 
  -9   2   0   -4.51    2.46 
   9   2   0   -0.44    2.19 
  -9   2   0    2.06    3.51 
  -9   2   0    3.48    3.42 
  -9   2   0    0.49    2.75 
   9   2   0   -0.33    2.32 
   9   2   0   -1.82    1.75 
  -9   2   0   -1.06    2.23 
  -9   2   0    3.45    3.16 
  10  -2   0    1.80    2.50 
  10  -2   0   -0.63    2.98 
  10  -2   0    0.96    2.81 
  10  -2   0    0.65    3.71 
 -10  -2   0    6.93    3.61 
 -10  -2   0    0.83    3.04 
  10  -2   0    3.69    2.86 
  10  -2   0   -0.42    2.52 
 -10  -2   0    1.89    2.86 
 -10  -2   0    0.00    2.80 
 -10  -2   0    5.83    3.12 
 -10  -2   0   -1.01    2.90 
 -10  -2   0    3.31    3.19 
 -10  -2   0    0.35    3.23 
 -10  -2   0   -0.03    3.33 
 -10   2   0   -0.02    2.83 
  10   2   0   -3.61    2.50 
  10   2   0   -0.76    2.86 
 -10   2   0    3.64    2.91 
 -10   2   0    2.72    3.36 
 -10   2   0   -0.70    2.86 
  10   2   0   -2.21    2.16 
 -10   2   0    0.77    3.85 
  10   2   0    0.86    2.47 
 -10   2   0    1.24    3.62 
 -10   2   0    5.15    3.57 
 -10   2   0    6.72    3.76 
 -10   2   0    1.91    3.54 
  10   2   0    0.00    3.71 
  10   2   0   -1.09    2.28 
 -10   2   0    7.77    3.62 
  10   2   0    6.26    2.78 
 -10   2   0    2.88    3.14 
 -10   2   0   -0.98    2.92 
 -10   2   0   -2.03    3.55 
   0  -3   0   -1.16    1.14 
   0  -3   0    0.09    2.31 
   0  -3   0    1.06    1.58 
   0  -3   0    1.65    1.08 
   0  -3   0   -1.34    1.05 
   0  -3   0    0.35    1.52 
   0  -3   0    0.92    0.98 
   0  -3   0    0.83    1.04 
   0  -3   0   -0.89    0.81 
   0  -3   0    1.58    2.00 
   0  -3   0    0.31    0.61 
   0  -3   0   -0.57    1.33 
   0  -3   0   -2.37    1.46 
   0  -3   0   -1.21    1.68 
   0  -3   0    0.16    1.78 
   0  -3   0    0.66    1.81 
   0   3   0    1.44    1.76 
   0   3   0    0.26    1.40 
   0   3   0    0.27    1.84 
   0   3   0    0.76    0.89 
   0   3   0   -0.81    0.88 
   0   3   0    1.91    2.02 
   0   3   0   -0.52    0.65 
   0   3   0    0.91    1.86 
   0   3   0   -0.07    0.60 
   0   3   0   -2.05    1.05 
   0   3   0    0.93    0.76 
   0   3   0    0.50    0.79 
   0   3   0   -1.05    0.60 
   0   3   0    2.77    1.24 
  -1  -3   0   11.23    2.83 
   1  -3   0   13.27    1.86 
  -1  -3   0   11.23    2.10 
  -1  -3   0    8.50    1.48 
   1  -3   0    7.94    2.47 
   1  -3   0    5.92    2.90 
   1  -3   0    9.15    1.41 
   1  -3   0    8.78    2.33 
   1  -3   0    7.97    1.50 
  -1  -3   0    8.61    1.71 
   1  -3   0    5.88    2.07 
   1  -3   0    3.52    2.27 
  -1  -3   0    8.36    1.63 
   1  -3   0    3.75    2.42 
  -1  -3   0   10.01    1.82 
   1  -3   0   14.43    1.83 
  -1  -3   0    7.17    1.54 
   1  -3   0   11.62    2.65 
   1  -3   0    9.31    1.65 
  -1  -3   0   11.92    1.70 
  -1  -3   0    8.41    1.80 
   1  -3   0   10.78    2.54 
  -1  -3   0    8.71    1.84 
   1  -3   0    9.53    2.07 
  -1  -3   0    9.88    1.63 
  -1  -3   0   11.12    1.90 
   1   3   0    9.14    1.71 
  -1   3   0    8.38    1.38 
   1   3   0   10.99    1.02 
   1   3   0    9.51    1.13 
   1   3   0   10.27    1.86 
   1   3   0   14.74    2.08 
   1   3   0   10.00    1.74 
   1   3   0   11.05    2.27 
  -1   3   0   10.85    1.42 
  -1   3   0   11.73    2.13 
   1   3   0   11.94    1.72 
   1   3   0    9.32    1.35 
   1   3   0   10.69    1.92 
   1   3   0    7.44    1.50 
  -1   3   0   11.38    1.77 
  -1   3   0   10.38    1.67 
  -1   3   0    6.19    2.51 
  -1   3   0    8.16    1.74 
   1   3   0   10.63    1.53 
  -1   3   0    9.51    2.85 
   1   3   0   11.35    1.71 
   1   3   0   12.44    1.69 
  -1   3   0   10.68    1.52 
  -1   3   0    9.36    1.66 
  -1   3   0    8.00    2.71 
   1   3   0    8.04    1.44 
  -1   3   0    7.62    2.23 
  -1   3   0    5.49    2.20 
  -1   3   0    9.32    1.53 
   1   3   0   14.71    2.44 
  -1   3   0    6.50    1.96 
   1   3   0   10.16    1.54 
  -1   3   0    3.86    3.02 
  -1   3   0    8.10    1.48 
   1   3   0   15.80    2.45 
  -1   3   0   11.24    1.56 
   2  -3   0    1.64    1.75 
   2  -3   0    0.61    1.17 
  -2  -3   0    0.28    1.31 
   2  -3   0    1.86    1.64 
  -2  -3   0    0.41    1.30 
  -2  -3   0    1.12    0.59 
   2  -3   0   -0.12    1.39 
  -2  -3   0    1.21    1.02 
   2  -3   0    1.61    0.87 
  -2  -3   0   -0.34    1.07 
   2  -3   0    1.93    1.22 
  -2  -3   0    1.62    1.20 
  -2  -3   0    0.81    1.18 
  -2  -3   0    0.28    1.22 
   2  -3   0   -0.59    1.41 
   2  -3   0    1.59    1.47 
   2  -3   0   -0.42    1.06 
   2  -3   0   -0.60    1.62 
   2  -3   0    2.13    1.23 
   2  -3   0    0.82    1.60 
   2  -3   0    0.78    0.77 
  -2  -3   0    0.43    0.84 
  -2  -3   0    1.20    1.18 
   2  -3   0    3.73    1.66 
  -2  -3   0    2.41    1.14 
   2  -3   0    1.39    0.76 
   2  -3   0   -0.16    1.11 
  -2  -3   0    0.35    1.26 
  -2  -3   0    0.21    0.95 
   2   3   0    0.36    0.82 
   2   3   0    1.36    1.40 
   2   3   0    1.00    1.15 
  -2   3   0    1.35    1.54 
   2   3   0    2.04    1.38 
  -2   3   0    0.84    2.09 
  -2   3   0   -0.24    1.25 
   2   3   0    1.00    1.01 
  -2   3   0   -1.28    1.21 
   2   3   0    1.93    1.00 
   2   3   0    0.84    1.29 
  -2   3   0    0.79    1.81 
  -2   3   0    0.73    1.07 
  -2   3   0    2.60    1.37 
   2   3   0    2.13    1.24 
  -2   3   0    0.60    1.63 
  -2   3   0   -0.01    0.72 
   2   3   0    1.08    0.84 
   2   3   0    0.68    0.58 
   2   3   0    0.53    1.31 
   2   3   0    0.15    1.03 
   2   3   0    2.67    1.66 
  -2   3   0    3.55    1.97 
   2   3   0    0.88    0.94 
   2   3   0   -0.11    1.26 
   2   3   0   -1.02    0.87 
  -2   3   0    0.71    1.19 
  -2   3   0    1.21    1.49 
   2   3   0    0.18    0.92 
  -2   3   0   -1.44    1.13 
  -3  -3   0    1.56    1.18 
  -3  -3   0    3.55    1.55 
  -3  -3   0    1.71    1.39 
   3  -3   0    1.27    1.15 
   3  -3   0    0.60    1.35 
  -3  -3   0   -0.17    1.09 
  -3  -3   0    0.12    0.81 
  -3  -3   0    0.86    0.99 
   3  -3   0    2.16    1.23 
   3  -3   0   -0.70    1.20 
  -3  -3   0    1.83    1.11 
  -3  -3   0   -0.05    0.93 
  -3  -3   0    2.20    1.28 
  -3  -3   0    3.49    1.60 
   3  -3   0    1.02    1.17 
   3  -3   0   -0.10    0.64 
   3  -3   0    1.33    1.32 
  -3  -3   0   -0.25    0.62 
   3  -3   0   -0.97    1.14 
  -3  -3   0   -0.42    1.00 
   3  -3   0   -0.55    0.97 
  -3   3   0   -0.70    1.54 
   3   3   0   -0.41    0.60 
   3   3   0    0.01    0.89 
  -3   3   0    0.89    0.86 
  -3   3   0    0.59    1.78 
   3   3   0    1.04    0.96 
  -3   3   0   -1.27    1.45 
  -3   3   0   -0.58    1.65 
   3   3   0    1.41    1.18 
   3   3   0   -0.39    0.74 
  -3   3   0   -1.18    1.19 
   3   3   0   -0.01    0.84 
   3   3   0   -0.93    1.16 
  -3   3   0    1.51    1.25 
  -3   3   0    0.87    1.16 
   3   3   0    1.68    1.24 
  -3   3   0    0.78    0.72 
  -3   3   0    1.02    1.38 
  -3   3   0    1.16    1.22 
  -3   3   0    0.16    1.34 
   3   3   0    0.40    1.31 
  -3   3   0    0.01    1.46 
   3   3   0    1.24    0.81 
   3   3   0   -0.71    0.85 
   3   3   0   -0.66    0.61 
   3   3   0    0.55    1.02 
   3   3   0    0.29    1.27 
   3   3   0    1.43    1.32 
  -4  -3   0  114.69    8.31 
  -4  -3   0  115.25    8.40 
  -4  -3   0  104.57    8.05 
   4  -3   0  102.47    8.25 
   4  -3   0  111.36    8.48 
   4  -3   0   98.82    8.47 
  -4  -3   0  116.09    7.71 
  -4  -3   0  107.71    7.72 
  -4  -3   0  113.10    8.42 
   4  -3   0  109.15    8.30 
  -4  -3   0  113.19    8.16 
   4  -3   0  111.37    8.32 
  -4  -3   0  106.49    8.60 
  -4  -3   0  110.30    8.55 
   4  -3   0  118.06    8.45 
  -4  -3   0  113.90    7.89 
  -4  -3   0  108.77    7.61 
  -4  -3   0  109.69    8.24 
   4  -3   0  117.57    8.25 
   4  -3   0  100.99    8.61 
   4  -3   0  124.02    8.47 
   4  -3   0  100.89    8.83 
   4  -3   0  112.78    7.80 
  -4   3   0   94.12    8.37 
  -4   3   0  100.63    8.42 
   4   3   0  108.21    7.96 
   4   3   0  116.65    8.14 
   4   3   0  113.88    7.83 
  -4   3   0  111.42    8.50 
   4   3   0  106.96    7.37 
   4   3   0  107.24    8.28 
  -4   3   0  102.74    8.41 
   4   3   0  120.44    8.74 
  -4   3   0  111.43    7.59 
   4   3   0  119.08    8.37 
  -4   3   0   91.39    7.75 
   4   3   0  102.20    7.65 
  -4   3   0  109.70    8.92 
   4   3   0  124.65    8.04 
  -4   3   0  111.85    8.28 
  -4   3   0  117.98    8.95 
   4   3   0  100.87    7.64 
   4   3   0  114.57    8.26 
   4   3   0  118.36    7.96 
   4   3   0  117.30    7.85 
   4   3   0  112.50    8.02 
   4   3   0  112.66    8.04 
   4   3   0  117.42    8.27 
  -4   3   0  119.42    8.23 
  -4   3   0  114.45    9.17 
   4   3   0  124.77    8.52 
  -4   3   0  116.22    9.15 
  -5  -3   0   58.26    4.76 
   5  -3   0   54.40    5.42 
   5  -3   0   55.50    5.37 
  -5  -3   0   70.22    5.72 
  -5  -3   0   73.87    5.50 
  -5  -3   0   67.00    4.94 
   5  -3   0   70.51    5.65 
   5  -3   0   58.05    5.66 
  -5  -3   0   63.23    5.40 
  -5  -3   0   67.08    5.67 
  -5  -3   0   66.26    5.36 
  -5  -3   0   55.94    5.85 
   5  -3   0   72.25    5.72 
  -5  -3   0   63.09    5.60 
   5  -3   0   52.57    5.54 
   5  -3   0   68.85    5.41 
   5  -3   0   61.59    5.95 
   5  -3   0   64.22    6.51 
   5  -3   0   60.64    5.50 
  -5  -3   0   55.18    5.71 
  -5  -3   0   56.21    5.48 
   5  -3   0   66.78    4.98 
   5   3   0   62.34    5.48 
   5   3   0   61.48    5.22 
  -5   3   0   59.15    5.27 
  -5   3   0   62.40    5.89 
   5   3   0   62.93    5.50 
  -5   3   0   61.83    5.75 
  -5   3   0   67.58    6.61 
   5   3   0   61.82    5.44 
  -5   3   0   57.73    6.41 
   5   3   0   59.32    5.61 
  -5   3   0   64.91    5.90 
   5   3   0   63.93    5.13 
   5   3   0   63.11    5.15 
   5   3   0   64.30    5.23 
   5   3   0   55.11    4.48 
   5   3   0   60.29    4.91 
  -5   3   0   63.05    6.09 
  -5   3   0   56.38    6.21 
  -5   3   0   67.30    5.58 
  -5   3   0   64.60    5.73 
   5   3   0   66.17    5.44 
  -5   3   0   65.02    5.60 
  -5   3   0   64.30    4.71 
   5   3   0   66.69    5.04 
   6  -3   0  233.88   16.81 
  -6  -3   0  243.28   17.03 
   6  -3   0  233.81   16.22 
   6  -3   0  235.79   17.02 
   6  -3   0  230.03   17.36 
  -6  -3   0  229.44   17.28 
  -6  -3   0  246.71   15.98 
   6  -3   0  244.10   16.76 
   6  -3   0  224.77   16.75 
   6  -3   0  247.91   16.80 
  -6  -3   0  231.16   16.84 
   6  -3   0  231.26   16.44 
   6  -3   0  225.72   16.61 
  -6  -3   0  259.05   16.76 
  -6  -3   0  228.10   16.03 
  -6  -3   0  225.13   15.68 
  -6  -3   0  227.08   16.82 
  -6  -3   0  237.58   16.94 
   6  -3   0  250.65   16.84 
   6  -3   0  235.30   17.75 
  -6  -3   0  243.79   17.19 
  -6  -3   0  233.53   16.45 
   6  -3   0  225.29   17.05 
  -6  -3   0  248.10   16.65 
   6   3   0  239.31   16.79 
  -6   3   0  230.65   17.40 
  -6   3   0  243.57   17.18 
  -6   3   0  232.35   16.06 
  -6   3   0  220.56   16.96 
  -6   3   0  210.00   16.86 
  -6   3   0  221.46   16.33 
   6   3   0  234.95   16.42 
  -6   3   0  221.60   16.89 
   6   3   0  248.53   16.28 
   6   3   0  239.12   16.72 
  -6   3   0  253.87   16.84 
  -6   3   0  235.17   17.01 
   6   3   0  231.51   16.47 
  -6   3   0  234.73   17.71 
   6   3   0  258.34   17.01 
  -6   3   0  226.36   17.51 
   6   3   0  264.89   17.63 
  -6   3   0  237.79   16.79 
   6   3   0  239.70   16.40 
   6   3   0  244.44   16.65 
   6   3   0  230.85   16.69 
   6   3   0  231.25   16.34 
  -6   3   0  237.79   17.93 
   7  -3   0   39.78    4.92 
  -7  -3   0   46.85    5.87 
   7  -3   0   44.96    5.85 
  -7  -3   0   47.73    4.37 
   7  -3   0   48.85    5.35 
  -7  -3   0   55.49    5.87 
  -7  -3   0   42.28    5.38 
   7  -3   0   50.73    5.49 
  -7  -3   0   35.74    4.36 
   7  -3   0   45.32    4.79 
   7  -3   0   46.74    5.28 
  -7  -3   0   35.38    4.98 
   7  -3   0   38.92    5.10 
   7  -3   0   47.80    6.70 
   7  -3   0   50.57    4.81 
  -7  -3   0   44.57    5.26 
   7  -3   0   39.94    5.46 
  -7  -3   0   52.20    5.83 
   7  -3   0   51.93    5.69 
  -7  -3   0   39.21    4.93 
  -7  -3   0   40.01    5.50 
   7  -3   0   43.82    5.24 
   7   3   0   38.41    4.90 
  -7   3   0   47.95    6.45 
   7   3   0   38.20    4.95 
   7   3   0   50.76    4.87 
  -7   3   0   43.74    5.85 
  -7   3   0   43.16    5.26 
  -7   3   0   43.51    5.44 
  -7   3   0   42.50    5.56 
  -7   3   0   50.19    5.53 
  -7   3   0   51.75    5.86 
   7   3   0   40.29    5.36 
  -7   3   0   49.09    4.70 
   7   3   0   56.05    5.34 
  -7   3   0   48.44    6.31 
  -7   3   0   45.16    5.62 
   7   3   0   43.58    5.32 
  -7   3   0   56.45    7.25 
   7   3   0   48.46    6.34 
   7   3   0   52.35    5.41 
   7   3   0   42.82    4.85 
   7   3   0   50.04    4.76 
   7   3   0   43.58    4.35 
   7   3   0   58.41    5.77 
  -7   3   0   44.83    6.13 
  -8  -3   0   55.14    6.86 
  -8  -3   0   62.97    6.89 
   8  -3   0   44.91    5.51 
   8  -3   0   37.24    5.30 
  -8  -3   0   51.70    6.17 
   8  -3   0   50.99    6.05 
   8  -3   0   44.20    5.64 
   8  -3   0   48.52    5.85 
   8  -3   0   47.22    7.35 
  -8  -3   0   51.67    6.09 
  -8  -3   0   56.99    5.11 
  -8  -3   0   62.96    6.17 
   8  -3   0   53.02    5.86 
   8  -3   0   52.82    6.27 
  -8  -3   0   46.90    5.83 
   8  -3   0   37.08    5.67 
   8  -3   0   46.35    5.08 
  -8  -3   0   45.06    6.08 
  -8  -3   0   52.52    6.17 
   8  -3   0   48.03    6.56 
   8   3   0   55.51    5.78 
   8   3   0   48.74    5.16 
  -8   3   0   51.63    7.26 
  -8   3   0   49.91    5.88 
   8   3   0   53.00    6.02 
  -8   3   0   50.70    6.90 
  -8   3   0   51.43    6.61 
  -8   3   0   43.76    6.09 
   8   3   0   56.64    5.94 
   8   3   0   56.50    6.27 
  -8   3   0   54.19    7.96 
  -8   3   0   62.34    6.41 
  -8   3   0   56.05    7.28 
   8   3   0   47.64    5.49 
   8   3   0   45.67    6.01 
  -8   3   0   49.81    6.53 
  -8   3   0   47.77    6.07 
  -8   3   0   51.57    6.43 
   8   3   0   53.25    6.17 
   8   3   0   49.59    7.07 
  -9  -3   0    3.50    3.17 
  -9  -3   0    5.46    3.15 
   9  -3   0    8.37    3.27 
   9  -3   0   16.52    3.54 
   9  -3   0    6.34    3.29 
   9  -3   0   13.98    3.41 
  -9  -3   0    9.45    3.31 
  -9  -3   0    5.73    3.30 
   9  -3   0   13.35    3.94 
   9  -3   0    8.84    3.11 
   9  -3   0   11.95    3.39 
   9  -3   0    8.56    3.09 
  -9  -3   0    9.97    3.17 
  -9  -3   0    9.07    3.61 
  -9  -3   0    9.21    3.11 
  -9  -3   0   10.05    3.29 
   9  -3   0    5.02    4.36 
   9   3   0    0.91    3.77 
   9   3   0   12.38    3.65 
  -9   3   0   17.34    4.44 
  -9   3   0   10.88    3.44 
  -9   3   0   12.13    4.52 
  -9   3   0   11.89    4.45 
  -9   3   0    5.66    3.36 
   9   3   0   10.02    3.17 
  -9   3   0   12.89    3.46 
   9   3   0   12.50    3.29 
  -9   3   0   10.09    4.65 
  -9   3   0   16.81    4.05 
   9   3   0   13.39    3.06 
   9   3   0    4.94    2.77 
   9   3   0   11.60    3.69 
  -9   3   0   15.55    3.82 
  -9   3   0   13.42    4.25 
  -9   3   0   13.12    3.66 
   0  -4   0    1.39    1.44 
   0  -4   0    2.27    1.50 
   0  -4   0    0.08    1.90 
   0  -4   0    0.10    0.92 
   0  -4   0   -0.82    2.67 
   0  -4   0   -0.61    1.53 
   0  -4   0   -0.98    2.34 
   0  -4   0   -1.92    1.92 
   0  -4   0    0.57    1.35 
   0  -4   0    1.39    1.48 
   0  -4   0   -0.45    2.45 
   0  -4   0   -0.64    2.98 
   0   4   0   -0.35    1.55 
   0   4   0    1.21    1.06 
   0   4   0   -2.36    2.47 
   0   4   0    3.00    1.64 
   0   4   0   -1.34    2.58 
   0   4   0    0.00    0.98 
   0   4   0    0.33    2.63 
   0   4   0    0.05    1.46 
   0   4   0    1.60    1.99 
   0   4   0    1.40    1.16 
   0   4   0   -0.83    2.23 
   0   4   0    1.85    0.93 
   1  -4   0  713.36   45.83 
   1  -4   0  669.07   45.78 
   1  -4   0  625.72   47.33 
   1  -4   0  724.65   45.82 
  -1  -4   0  710.62   46.17 
  -1  -4   0  730.37   46.26 
  -1  -4   0  704.65   45.73 
  -1  -4   0  692.53   45.85 
  -1  -4   0  635.79   47.64 
  -1  -4   0  686.68   45.65 
   1  -4   0  714.35   46.79 
  -1  -4   0  704.50   46.09 
   1  -4   0  582.96   46.56 
  -1  -4   0  666.32   45.93 
   1  -4   0  787.94   47.77 
   1  -4   0  609.77   45.76 
   1  -4   0  659.74   46.13 
   1  -4   0  716.98   46.02 
   1  -4   0  670.55   46.51 
  -1  -4   0  689.21   45.78 
  -1  -4   0  679.01   45.79 
   1   4   0  683.07   45.00 
   1   4   0  712.62   45.85 
  -1   4   0  719.54   45.46 
  -1   4   0  703.70   47.24 
   1   4   0  793.39   46.96 
   1   4   0  736.10   45.81 
   1   4   0  684.49   45.47 
   1   4   0  678.39   45.34 
  -1   4   0  633.24   46.80 
   1   4   0  718.02   46.76 
  -1   4   0  674.05   45.41 
  -1   4   0  670.69   45.70 
  -1   4   0  725.70   48.92 
  -1   4   0  696.52   45.82 
  -1   4   0  720.40   45.89 
   1   4   0  682.97   45.95 
  -1   4   0  685.84   46.57 
   1   4   0  711.10   45.72 
   1   4   0  720.20   45.90 
  -1   4   0  701.76   45.42 
   1   4   0  749.62   46.21 
  -1   4   0  780.52   46.95 
   1   4   0  680.42   45.71 
   1   4   0  753.91   46.81 
  -1   4   0  694.66   47.35 
   1   4   0  690.54   45.88 
   1   4   0  678.88   45.20 
   1   4   0  683.51   45.01 
   2  -4   0    1.12    1.30 
  -2  -4   0    0.12    1.27 
   2  -4   0   -2.54    1.54 
   2  -4   0    0.66    1.32 
  -2  -4   0    0.02    0.88 
  -2  -4   0   -0.10    1.13 
  -2  -4   0    0.02    1.35 
  -2  -4   0    1.27    1.50 
   2  -4   0    0.02    0.86 
  -2  -4   0    0.39    1.27 
   2  -4   0    6.84    2.44 
  -2  -4   0   -0.52    0.84 
   2  -4   0    0.68    0.85 
  -2  -4   0    1.26    1.29 
  -2  -4   0    1.49    1.15 
  -2  -4   0    1.48    1.42 
   2  -4   0    1.28    1.24 
   2  -4   0   -2.82    2.20 
   2  -4   0   -1.60    1.55 
   2   4   0    0.70    1.25 
  -2   4   0   -1.58    1.49 
  -2   4   0   -0.08    1.52 
   2   4   0   -0.35    1.26 
   2   4   0   -0.38    0.61 
   2   4   0   -1.68    1.03 
  -2   4   0    2.16    2.38 
   2   4   0    3.17    1.19 
  -2   4   0    0.84    0.87 
   2   4   0    2.79    1.48 
   2   4   0    1.07    1.36 
  -2   4   0   -0.03    1.18 
  -2   4   0    1.18    1.89 
   2   4   0    0.61    1.22 
   2   4   0    1.45    1.12 
  -2   4   0    2.58    2.41 
  -2   4   0   -0.60    1.28 
   2   4   0    1.73    1.78 
   2   4   0    0.41    0.98 
   2   4   0    0.21    1.55 
   2   4   0    2.10    1.42 
  -2   4   0   -0.99    2.40 
  -2   4   0    0.91    1.35 
  -2   4   0    1.25    1.96 
   2   4   0   -2.34    0.74 
   3  -4   0   67.63    6.47 
   3  -4   0   70.59    6.50 
  -3  -4   0   68.37    5.57 
   3  -4   0   71.95    5.05 
  -3  -4   0   73.10    5.90 
   3  -4   0   64.25    6.16 
   3  -4   0   66.29    5.93 
   3  -4   0   59.85    5.69 
   3  -4   0   63.78    5.71 
  -3  -4   0   68.47    5.63 
  -3  -4   0   76.72    5.64 
  -3  -4   0   69.23    6.05 
  -3  -4   0   61.33    4.82 
   3  -4   0   70.84    6.36 
  -3  -4   0   67.12    5.57 
  -3  -4   0   67.61    6.02 
   3  -4   0   75.46    6.23 
   3  -4   0   66.59    5.75 
  -3  -4   0   66.67    5.40 
  -3  -4   0   73.89    5.57 
  -3  -4   0   77.03    6.03 
   3   4   0   75.55    6.08 
   3   4   0   76.79    5.50 
   3   4   0   79.61    5.40 
   3   4   0   70.40    5.26 
   3   4   0   70.08    5.82 
   3   4   0   64.91    5.61 
  -3   4   0   68.20    6.58 
  -3   4   0   76.32    6.99 
   3   4   0   71.37    5.64 
   3   4   0   67.94    5.13 
   3   4   0   71.77    5.84 
  -3   4   0   69.72    6.25 
  -3   4   0   71.28    6.98 
  -3   4   0   67.66    7.13 
   3   4   0   68.41    4.82 
  -3   4   0   74.32    5.82 
   3   4   0   70.67    5.42 
  -3   4   0   79.40    6.43 
  -3   4   0   61.79    5.64 
   3   4   0   76.74    6.11 
   3   4   0   76.24    5.94 
  -3   4   0   80.76    6.04 
  -3   4   0   62.35    5.63 
  -3   4   0   65.41    5.76 
   3   4   0   60.54    5.61 
   4  -4   0    4.40    1.75 
   4  -4   0    1.76    1.63 
  -4  -4   0   -0.45    1.46 
  -4  -4   0    0.61    1.28 
  -4  -4   0    0.46    0.76 
   4  -4   0    2.08    2.61 
   4  -4   0    2.50    1.53 
  -4  -4   0    3.73    1.71 
  -4  -4   0    0.90    1.53 
  -4  -4   0    1.84    1.42 
   4  -4   0    4.06    1.55 
  -4  -4   0    0.71    1.18 
  -4  -4   0   -0.07    1.21 
   4  -4   0    1.27    1.59 
   4  -4   0    2.71    1.78 
   4  -4   0    1.42    1.66 
  -4  -4   0    1.62    1.45 
   4  -4   0    3.33    1.48 
  -4  -4   0    1.31    1.17 
  -4   4   0    1.57    1.69 
   4   4   0    0.89    0.92 
   4   4   0    0.59    1.51 
   4   4   0    4.78    1.89 
  -4   4   0    1.25    1.43 
  -4   4   0    2.42    1.91 
   4   4   0    0.23    1.14 
   4   4   0    1.40    0.97 
   4   4   0    0.89    0.67 
   4   4   0    0.02    1.50 
  -4   4   0    1.75    1.66 
  -4   4   0    0.52    2.15 
  -4   4   0    2.41    1.54 
   4   4   0    3.44    1.31 
  -4   4   0   -1.64    1.27 
  -4   4   0    0.69    2.28 
   4   4   0    3.65    1.55 
  -4   4   0    2.79    1.94 
   4   4   0    2.57    0.95 
   4   4   0    1.39    1.44 
   4   4   0    0.82    1.65 
   4   4   0    2.41    1.57 
  -4   4   0   -2.03    1.83 
   4   4   0    1.37    1.49 
   4   4   0    1.96    1.39 
   5  -4   0   56.40    5.88 
   5  -4   0   59.75    5.43 
  -5  -4   0   60.32    5.34 
  -5  -4   0   60.05    5.41 
   5  -4   0   61.06    6.11 
   5  -4   0   55.48    5.41 
  -5  -4   0   57.23    5.83 
  -5  -4   0   62.36    6.03 
   5  -4   0   54.96    5.37 
  -5  -4   0   58.84    4.70 
  -5  -4   0   56.73    5.25 
   5  -4   0   55.58    5.62 
  -5  -4   0   58.88    4.86 
   5  -4   0   49.36    6.02 
   5  -4   0   63.86    6.59 
  -5  -4   0   60.59    5.23 
  -5  -4   0   62.45    5.62 
   5  -4   0   60.41    6.20 
  -5  -4   0   65.24    6.22 
   5  -4   0   48.00    5.80 
   5  -4   0   67.66    5.65 
   5   4   0   58.21    4.96 
  -5   4   0   61.18    5.54 
   5   4   0   62.64    5.30 
   5   4   0   53.98    5.55 
   5   4   0   65.99    5.42 
  -5   4   0   56.50    5.30 
  -5   4   0   63.58    7.24 
   5   4   0   66.76    5.88 
  -5   4   0   53.29    5.88 
  -5   4   0   48.58    6.40 
  -5   4   0   61.34    6.67 
  -5   4   0   64.75    7.44 
   5   4   0   42.61    5.54 
   5   4   0   55.77    5.65 
   5   4   0   52.05    5.48 
  -5   4   0   51.46    5.85 
   5   4   0   61.65    5.12 
   5   4   0   58.30    4.84 
   5   4   0   58.31    5.62 
  -5   4   0   54.24    5.89 
   5   4   0   55.00    4.71 
   5   4   0   59.76    5.55 
  -5   4   0   48.29    5.85 
  -6  -4   0   15.55    2.84 
   6  -4   0   16.63    3.46 
   6  -4   0   15.59    2.96 
  -6  -4   0   11.78    2.78 
  -6  -4   0   16.40    2.82 
  -6  -4   0   15.93    2.30 
   6  -4   0   16.37    3.03 
   6  -4   0   16.62    2.42 
   6  -4   0   11.70    2.94 
  -6  -4   0   19.19    3.54 
  -6  -4   0   16.88    2.87 
   6  -4   0   11.36    2.78 
   6  -4   0   15.91    3.15 
   6  -4   0   18.74    3.36 
   6  -4   0   16.76    4.14 
  -6  -4   0   15.83    3.18 
   6  -4   0   20.37    3.26 
   6  -4   0   15.24    3.25 
  -6  -4   0   14.82    2.04 
  -6  -4   0   12.36    3.43 
  -6  -4   0   14.17    3.35 
   6  -4   0   20.46    3.36 
  -6  -4   0   16.03    3.05 
   6   4   0   16.75    3.10 
   6   4   0   11.38    2.72 
  -6   4   0   16.30    2.81 
  -6   4   0   11.51    3.29 
   6   4   0   15.06    2.91 
   6   4   0   21.77    3.40 
  -6   4   0   12.71    4.02 
  -6   4   0   12.09    3.14 
   6   4   0   15.85    3.42 
  -6   4   0   16.93    4.43 
  -6   4   0   18.69    3.38 
  -6   4   0   11.37    3.20 
  -6   4   0   16.44    3.91 
   6   4   0   13.21    2.68 
   6   4   0   11.39    2.39 
   6   4   0   12.00    2.46 
   6   4   0   15.89    2.44 
  -6   4   0   17.76    3.48 
  -6   4   0   12.95    3.37 
   6   4   0   15.90    3.32 
  -7  -4   0   80.76    7.04 
   7  -4   0   82.05    7.88 
  -7  -4   0   85.23    7.28 
   7  -4   0   80.18    8.69 
   7  -4   0   83.77    7.60 
   7  -4   0   81.97    7.63 
  -7  -4   0   95.31    7.94 
   7  -4   0   80.40    7.56 
   7  -4   0   93.53    7.51 
   7  -4   0   96.70    8.62 
  -7  -4   0   84.30    7.41 
  -7  -4   0   82.08    8.05 
   7  -4   0   93.41    7.73 
  -7  -4   0   72.86    7.44 
   7  -4   0   83.09    7.53 
  -7  -4   0   87.19    8.25 
   7  -4   0   75.67    7.75 
   7  -4   0   80.08    7.40 
  -7  -4   0   82.68    7.84 
  -7  -4   0   78.93    7.60 
   7  -4   0   83.09    7.22 
  -7   4   0   82.06    8.39 
  -7   4   0   79.98    8.84 
  -7   4   0   85.53    9.55 
   7   4   0   75.43    6.96 
   7   4   0   85.26    7.37 
  -7   4   0   78.81    7.05 
   7   4   0   82.76    8.39 
   7   4   0   84.82    7.55 
   7   4   0   78.52    6.70 
  -7   4   0   70.15    7.91 
  -7   4   0   84.47    9.13 
   7   4   0   74.34    8.38 
  -7   4   0   86.86    7.72 
   7   4   0   78.21    6.86 
   7   4   0   81.95    7.34 
  -7   4   0   89.97    8.11 
   7   4   0   87.67    7.48 
  -7   4   0   82.90    8.05 
   7   4   0   76.82    7.01 
  -7   4   0   75.89    8.28 
  -7   4   0   76.31    8.97 
   7   4   0   87.57    7.95 
  -8  -4   0   14.57    3.72 
   8  -4   0    5.21    3.14 
   8  -4   0   15.12    4.60 
   8  -4   0    7.97    3.07 
   8  -4   0    7.65    3.28 
  -8  -4   0    6.53    2.35 
   8  -4   0   13.30    3.35 
   8  -4   0    5.51    2.58 
  -8  -4   0   10.47    2.97 
  -8  -4   0    6.47    2.81 
  -8  -4   0    4.46    2.66 
   8  -4   0    9.57    3.11 
  -8  -4   0    8.74    2.95 
  -8  -4   0    4.23    2.80 
   8  -4   0   10.63    3.12 
   8  -4   0    7.57    2.97 
   8  -4   0    3.45    2.65 
  -8  -4   0    3.38    2.68 
  -8  -4   0   12.48    3.55 
  -8   4   0    3.52    2.73 
   8   4   0    4.90    3.32 
  -8   4   0    8.91    4.00 
  -8   4   0    7.70    3.17 
  -8   4   0    4.08    3.54 
   8   4   0    3.78    2.08 
   8   4   0    5.09    3.16 
   8   4   0   10.73    2.97 
   8   4   0    6.92    2.63 
  -8   4   0   11.30    4.71 
  -8   4   0    4.30    2.91 
  -8   4   0    2.19    3.14 
  -8   4   0    8.09    4.29 
  -8   4   0    4.94    3.60 
   8   4   0    5.90    2.70 
  -8   4   0    5.28    3.52 
   8   4   0    8.37    3.30 
   8   4   0    6.58    2.66 
   9  -4   0   11.08    4.52 
   9  -4   0    2.78    2.63 
  -9  -4   0    5.12    2.73 
   9  -4   0   -2.39    3.42 
  -9  -4   0    5.14    2.79 
   9  -4   0    5.51    2.93 
   9  -4   0    3.30    2.69 
  -9  -4   0    7.58    3.43 
  -9  -4   0    6.88    3.35 
  -9  -4   0    4.87    3.18 
  -9  -4   0    4.20    2.67 
  -9  -4   0   10.75    3.50 
   9  -4   0   -0.83    2.45 
   9  -4   0   10.38    3.18 
  -9  -4   0    6.10    3.11 
   9  -4   0    5.89    2.96 
   9  -4   0    9.79    3.66 
   9  -4   0    3.96    2.93 
   9   4   0    1.99    2.53 
  -9   4   0    5.71    4.19 
  -9   4   0    7.80    4.59 
   9   4   0    3.34    2.77 
  -9   4   0    2.17    2.98 
   9   4   0    2.35    2.20 
  -9   4   0    6.46    3.05 
  -9   4   0    0.76    3.10 
   9   4   0    1.71    2.96 
  -9   4   0    2.98    3.07 
  -9   4   0    0.56    3.50 
  -9   4   0    2.33    3.49 
  -9   4   0   -0.58    3.44 
   9   4   0    4.66    3.26 
   9   4   0   -1.87    3.29 
   9   4   0    7.23    2.72 
  -9   4   0   -0.42    3.72 
   0  -5   0   -1.46    1.18 
   0  -5   0    1.41    3.65 
   0  -5   0    1.74    1.50 
   0  -5   0   -2.52    1.57 
   0  -5   0    0.35    1.48 
   0  -5   0   -0.45    1.41 
   0  -5   0    0.99    2.79 
   0  -5   0   -1.95    2.48 
   0  -5   0    2.06    2.53 
   0  -5   0   -0.36    2.40 
   0  -5   0    1.97    1.98 
   0  -5   0   -0.19    0.91 
   0   5   0    1.34    1.57 
   0   5   0    0.17    1.43 
   0   5   0   -1.26    0.94 
   0   5   0   -0.41    1.78 
   0   5   0   -3.01    2.23 
   0   5   0   -1.21    2.03 
   0   5   0   -0.15    1.41 
   0   5   0   -1.14    1.44 
   0   5   0   -0.49    1.32 
   0   5   0   -2.79    2.33 
   0   5   0   -0.49    0.82 
   1  -5   0    5.09    2.93 
   1  -5   0    4.50    1.87 
  -1  -5   0    3.09    2.35 
   1  -5   0    3.46    3.15 
  -1  -5   0    2.00    2.14 
  -1  -5   0    3.05    1.60 
   1  -5   0    0.52    2.25 
   1  -5   0    4.13    1.69 
   1  -5   0    2.79    3.39 
  -1  -5   0    4.54    1.62 
  -1  -5   0    1.46    1.63 
  -1  -5   0    2.44    1.55 
   1  -5   0    3.64    1.68 
   1  -5   0    4.22    1.74 
  -1  -5   0    3.06    2.17 
   1  -5   0    3.15    2.41 
   1  -5   0    9.50    4.06 
  -1  -5   0    3.41    1.56 
   1  -5   0    4.80    1.94 
  -1   5   0    4.05    2.42 
  -1   5   0    3.66    2.78 
   1   5   0    1.78    1.55 
   1   5   0    5.33    1.89 
   1   5   0    3.31    1.67 
   1   5   0    4.56    1.45 
   1   5   0    2.41    0.91 
  -1   5   0    8.13    3.08 
   1   5   0    4.22    1.23 
   1   5   0    4.08    1.97 
   1   5   0    3.64    2.84 
   1   5   0    2.42    0.78 
   1   5   0    4.22    1.92 
  -1   5   0    1.51    1.73 
  -1   5   0    2.52    1.40 
  -1   5   0    2.50    2.31 
  -1   5   0    5.38    1.91 
  -1   5   0    0.65    1.61 
   1   5   0    4.97    2.14 
   1   5   0    1.05    2.34 
   1   5   0    7.08    2.05 
   1   5   0    6.15    2.82 
  -1   5   0    5.46    3.52 
  -1   5   0    4.06    1.38 
  -2  -5   0   -0.05    1.40 
   2  -5   0    1.09    2.85 
  -2  -5   0    1.44    1.68 
   2  -5   0    0.73    1.41 
  -2  -5   0    0.61    1.13 
   2  -5   0    0.05    1.85 
   2  -5   0   -2.41    2.02 
  -2  -5   0   -0.10    1.30 
   2  -5   0   -0.07    2.27 
   2  -5   0    2.26    1.69 
  -2  -5   0   -2.57    1.26 
  -2  -5   0   -0.06    1.69 
  -2  -5   0   -0.36    1.38 
   2  -5   0   -0.24    1.33 
   2  -5   0   -2.16    1.16 
  -2  -5   0    0.93    1.53 
   2  -5   0    0.48    1.22 
  -2   5   0    1.73    2.31 
   2   5   0   -0.93    1.27 
   2   5   0    0.95    1.10 
   2   5   0    0.58    0.86 
   2   5   0   -0.23    1.34 
   2   5   0    0.66    1.47 
  -2   5   0    1.78    1.55 
   2   5   0    0.45    1.65 
  -2   5   0    3.35    1.72 
  -2   5   0    0.46    1.26 
   2   5   0   -0.64    1.84 
  -2   5   0    3.28    3.12 
   2   5   0   -0.09    1.42 
   2   5   0    0.74    1.68 
   2   5   0    4.17    1.89 
  -2   5   0   -1.94    1.91 
   2   5   0   -1.22    1.61 
  -2   5   0   -0.39    2.19 
  -2   5   0   -0.03    2.03 
  -2   5   0    4.48    2.67 
  -2   5   0    0.67    1.38 
   3  -5   0    0.95    1.53 
   3  -5   0    1.82    2.41 
  -3  -5   0    0.52    1.40 
  -3  -5   0    1.48    1.66 
  -3  -5   0   -1.20    1.31 
  -3  -5   0    0.12    1.41 
   3  -5   0   -0.17    2.08 
   3  -5   0   -0.41    1.51 
   3  -5   0    1.40    1.74 
  -3  -5   0   -0.43    1.50 
   3  -5   0    2.89    1.63 
   3  -5   0   -1.94    2.35 
  -3  -5   0    1.39    1.74 
   3  -5   0    0.65    1.96 
  -3  -5   0    1.38    1.43 
  -3  -5   0   -0.23    1.47 
   3  -5   0    2.35    2.56 
   3  -5   0   -1.06    0.78 
   3   5   0    3.08    2.31 
   3   5   0   -0.64    1.65 
   3   5   0   -0.66    1.20 
  -3   5   0    1.00    1.70 
   3   5   0    0.31    1.39 
   3   5   0    0.71    1.45 
  -3   5   0    1.50    2.89 
  -3   5   0    3.10    2.84 
  -3   5   0   -1.52    1.63 
  -3   5   0   -0.74    2.04 
   3   5   0    1.70    1.69 
   3   5   0   -0.19    1.34 
   3   5   0    0.58    1.22 
  -3   5   0   -1.62    1.91 
   3   5   0    0.53    1.73 
  -3   5   0   -0.36    2.30 
  -3   5   0    2.18    1.59 
   3   5   0    0.05    1.08 
  -3   5   0    1.40    2.83 
   3   5   0   -1.30    1.43 
   3   5   0   -2.74    0.94 
  -3   5   0    0.56    1.69 
   3   5   0    0.14    1.48 
  -4  -5   0   74.22    5.96 
  -4  -5   0   61.81    5.80 
   4  -5   0   72.93    6.71 
   4  -5   0   62.75    7.20 
   4  -5   0   67.04    6.35 
  -4  -5   0   65.47    5.73 
  -4  -5   0   67.56    6.50 
  -4  -5   0   69.23    6.32 
   4  -5   0   74.61    6.32 
  -4  -5   0   77.34    6.00 
  -4  -5   0   67.63    6.51 
   4  -5   0   74.45    7.08 
   4  -5   0   70.82    6.52 
  -4  -5   0   62.66    6.68 
  -4  -5   0   72.28    5.87 
   4  -5   0   71.98    6.76 
   4  -5   0   74.54    7.66 
   4  -5   0   61.25    6.17 
  -4   5   0   74.66    8.74 
   4   5   0   67.98    6.55 
   4   5   0   68.31    6.25 
  -4   5   0   72.89    6.39 
   4   5   0   60.30    5.50 
  -4   5   0   66.24    8.14 
  -4   5   0   77.95    6.94 
  -4   5   0   70.64    6.14 
   4   5   0   72.97    5.73 
   4   5   0   60.98    5.33 
  -4   5   0   67.33    6.07 
  -4   5   0   67.47    7.18 
   4   5   0   64.54    6.09 
   4   5   0   59.14    6.03 
  -4   5   0   73.57    7.99 
  -4   5   0   68.95    6.23 
   4   5   0   65.32    5.59 
  -4   5   0   64.28    7.71 
   4   5   0   63.11    6.03 
   4   5   0   64.18    5.85 
  -4   5   0   69.14    6.16 
   4   5   0   68.55    6.46 
   4   5   0   68.35    6.06 
   5  -5   0    3.68    2.29 
   5  -5   0    2.46    2.34 
   5  -5   0    7.07    2.74 
  -5  -5   0    2.89    2.38 
  -5  -5   0    6.15    2.33 
   5  -5   0    4.20    2.24 
  -5  -5   0   10.83    2.81 
  -5  -5   0    4.04    1.70 
   5  -5   0    4.47    2.14 
   5  -5   0    7.16    2.58 
   5  -5   0    8.83    3.40 
  -5  -5   0    5.42    1.83 
   5  -5   0   10.55    2.95 
  -5  -5   0    3.41    2.25 
  -5  -5   0    5.86    2.02 
  -5  -5   0    6.93    2.16 
  -5  -5   0    3.12    1.84 
   5  -5   0    3.29    2.19 
   5  -5   0    3.47    2.13 
   5   5   0    3.59    2.04 
  -5   5   0    4.67    2.22 
   5   5   0    4.29    2.26 
   5   5   0    7.03    2.67 
  -5   5   0   -0.01    2.39 
   5   5   0    6.76    2.27 
  -5   5   0    6.22    2.66 
  -5   5   0    3.24    2.44 
   5   5   0    2.64    1.97 
   5   5   0    5.73    2.27 
   5   5   0    6.23    2.13 
  -5   5   0    3.31    2.71 
  -5   5   0    5.71    2.27 
  -5   5   0    4.34    3.49 
   5   5   0    5.45    2.11 
  -5   5   0    3.85    2.51 
   5   5   0    5.44    1.72 
   5   5   0    6.95    1.87 
  -5   5   0    3.92    3.14 
   5   5   0    5.52    2.05 
  -5   5   0    5.73    3.24 
   6  -5   0  217.97   16.43 
  -6  -5   0  230.88   16.97 
   6  -5   0  211.11   17.14 
   6  -5   0  251.72   17.04 
   6  -5   0  231.60   16.59 
  -6  -5   0  227.48   15.68 
  -6  -5   0  222.83   16.60 
  -6  -5   0  226.41   16.38 
   6  -5   0  228.33   16.71 
   6  -5   0  219.27   16.86 
   6  -5   0  200.80   16.74 
  -6  -5   0  219.14   16.16 
  -6  -5   0  220.04   17.02 
  -6  -5   0  213.49   16.20 
   6  -5   0  237.22   16.59 
  -6  -5   0  223.71   16.07 
   6  -5   0  223.83   16.41 
  -6  -5   0  242.64   16.85 
   6  -5   0  230.89   16.78 
   6  -5   0  230.56   17.37 
  -6   5   0  228.33   16.96 
   6   5   0  223.33   15.81 
   6   5   0  215.60   16.36 
   6   5   0  219.82   16.34 
  -6   5   0  220.45   16.76 
  -6   5   0  232.38   17.70 
  -6   5   0  237.30   18.26 
   6   5   0  206.36   16.10 
  -6   5   0  231.40   16.35 
   6   5   0  221.71   15.99 
   6   5   0  240.17   16.42 
  -6   5   0  216.82   17.01 
  -6   5   0  229.95   16.83 
  -6   5   0  208.28   18.03 
   6   5   0  221.00   15.87 
   6   5   0  225.74   16.46 
   6   5   0  252.62   15.82 
  -6   5   0  250.48   18.31 
   6   5   0  220.68   16.76 
   6   5   0  214.84   16.23 
  -6   5   0  223.81   16.46 
  -7  -5   0    5.85    2.46 
   7  -5   0    5.24    2.55 
   7  -5   0    7.30    2.75 
  -7  -5   0    5.33    2.73 
   7  -5   0    4.28    2.87 
   7  -5   0    2.07    2.59 
  -7  -5   0    9.38    2.49 
   7  -5   0   -2.02    2.01 
   7  -5   0    4.63    2.73 
   7  -5   0    5.29    3.14 
   7  -5   0    2.03    2.66 
   7  -5   0    3.83    2.82 
  -7  -5   0    3.92    2.89 
  -7  -5   0    6.34    2.61 
  -7  -5   0    5.16    2.88 
   7  -5   0    2.37    2.74 
  -7  -5   0    4.93    2.75 
  -7  -5   0   10.20    3.18 
   7  -5   0    2.59    2.40 
  -7  -5   0    6.04    2.25 
  -7   5   0    2.83    3.60 
  -7   5   0    0.20    2.90 
   7   5   0    6.90    2.21 
   7   5   0    6.24    2.59 
  -7   5   0    4.10    2.39 
  -7   5   0    5.43    3.47 
  -7   5   0   11.28    3.85 
   7   5   0    4.10    2.39 
  -7   5   0    5.02    2.94 
   7   5   0    4.64    2.50 
  -7   5   0    7.51    3.18 
  -7   5   0    5.43    2.73 
  -7   5   0    6.16    3.93 
  -7   5   0    8.66    3.43 
   7   5   0    3.90    2.42 
   7   5   0    8.33    2.57 
   7   5   0    7.25    2.31 
   7   5   0    4.92    2.95 
   7   5   0    4.41    2.89 
  -7   5   0    1.64    2.77 
   8  -5   0   77.62    8.32 
  -8  -5   0   77.89    7.04 
   8  -5   0   68.12    9.37 
  -8  -5   0   84.09    8.38 
  -8  -5   0   85.13    7.97 
  -8  -5   0   78.54    8.46 
  -8  -5   0   89.77    7.93 
  -8  -5   0   66.14    8.50 
   8  -5   0   71.70    7.96 
   8  -5   0   77.47    8.10 
   8  -5   0   71.66    8.69 
   8  -5   0   50.30    7.60 
   8  -5   0   87.58    9.70 
  -8  -5   0   80.68    8.21 
   8  -5   0   81.68    8.15 
   8  -5   0   92.60    8.51 
  -8  -5   0   71.73    8.05 
  -8  -5   0   66.30    8.48 
  -8   5   0   70.18    9.36 
  -8   5   0   84.91    9.48 
  -8   5   0   70.85    8.32 
  -8   5   0   65.06    8.19 
  -8   5   0   69.50    8.39 
   8   5   0   79.30    7.04 
   8   5   0   73.63    7.80 
  -8   5   0   64.83    8.39 
  -8   5   0   69.39    9.90 
   8   5   0   71.62    8.51 
  -8   5   0   89.27    8.93 
   8   5   0   73.93    7.62 
  -8   5   0   76.86    8.03 
   8   5   0   67.26    6.73 
  -8   5   0   70.83    9.52 
   8   5   0   78.34    7.94 
   8   5   0   78.07    8.44 
  -8   5   0   56.34    8.46 
   8   5   0   75.18    7.73 
   8   5   0   70.88    8.07 
   9  -5   0   -5.00    2.37 
  -9  -5   0    6.80    3.77 
   9  -5   0    2.71    2.77 
   9  -5   0    1.22    2.57 
  -9  -5   0    0.00    2.68 
   9  -5   0   -2.78    2.66 
  -9  -5   0    0.94    2.96 
  -9  -5   0    1.70    3.14 
   9  -5   0   -1.22    2.72 
   9  -5   0    0.33    3.09 
   9  -5   0    2.22    3.07 
  -9  -5   0   -0.17    3.07 
  -9  -5   0    0.42    2.94 
   9  -5   0   -3.26    2.63 
   9  -5   0   -0.98    3.77 
  -9  -5   0    2.29    2.65 
   9  -5   0    3.18    3.84 
   9   5   0   -1.25    3.11 
  -9   5   0    0.96    3.55 
  -9   5   0    1.16    3.98 
  -9   5   0   -3.07    4.06 
  -9   5   0    2.76    3.96 
   9   5   0   -1.24    2.40 
  -9   5   0    5.74    4.08 
  -9   5   0    5.27    4.67 
  -9   5   0    0.19    3.23 
   9   5   0    4.15    2.78 
  -9   5   0    7.45    4.63 
   9   5   0    3.30    2.38 
  -9   5   0    0.69    2.88 
   9   5   0    6.94    3.49 
   9   5   0   -1.33    2.40 
   0  -6   0  133.88   10.85 
   0  -6   0  112.64   11.66 
   0  -6   0  122.52    9.54 
   0  -6   0   79.34   10.90 
   0  -6   0  126.97    9.81 
   0  -6   0  129.81    9.51 
   0  -6   0  147.44   11.25 
   0  -6   0  119.91    9.54 
   0  -6   0  121.21   10.58 
   0  -6   0  117.60    9.55 
   0  -6   0  116.66   11.51 
   0   6   0  132.42    9.86 
   0   6   0  128.11    9.61 
   0   6   0  112.79   11.15 
   0   6   0  117.19    9.91 
   0   6   0  124.54    9.41 
   0   6   0  141.07   11.45 
   0   6   0  110.32    9.42 
   0   6   0  118.73   11.41 
   0   6   0  114.67    8.63 
   0   6   0  128.95    9.75 
   0   6   0  119.65    9.55 
   0   6   0  118.86    8.53 
   0   6   0  131.23   10.36 
   1  -6   0  206.54   16.37 
  -1  -6   0  227.89   15.98 
  -1  -6   0  231.55   16.28 
  -1  -6   0  213.26   15.94 
   1  -6   0  251.69   17.58 
   1  -6   0  270.73   18.92 
   1  -6   0  231.29   16.26 
   1  -6   0  296.65   19.19 
  -1  -6   0  197.04   17.03 
   1  -6   0  251.28   17.76 
   1  -6   0  217.53   16.32 
  -1  -6   0  204.00   16.86 
  -1  -6   0  219.71   16.09 
   1  -6   0  226.84   16.26 
   1  -6   0  235.85   18.33 
  -1  -6   0  221.35   16.11 
   1  -6   0  231.70   17.22 
  -1  -6   0  226.05   17.16 
   1   6   0  210.85   15.22 
   1   6   0  215.77   17.72 
   1   6   0  245.06   16.42 
   1   6   0  212.71   14.83 
   1   6   0  211.00   16.17 
  -1   6   0  244.13   18.14 
  -1   6   0  274.47   17.02 
  -1   6   0  233.09   15.44 
  -1   6   0  254.37   18.00 
   1   6   0  207.81   17.66 
   1   6   0  217.62   14.92 
   1   6   0  201.47   15.90 
  -1   6   0  220.06   15.46 
   1   6   0  167.64   17.29 
  -1   6   0  222.45   16.05 
  -1   6   0  224.24   16.28 
   1   6   0  221.74   15.92 
   1   6   0  225.40   16.30 
   1   6   0  222.51   16.13 
  -1   6   0  211.70   18.63 
  -1   6   0  272.26   17.91 
  -1   6   0  207.19   16.08 
   1   6   0  229.14   16.31 
   2  -6   0   61.81    5.56 
  -2  -6   0   54.01    5.01 
   2  -6   0   49.53    6.58 
  -2  -6   0   57.43    5.67 
  -2  -6   0   52.05    5.54 
   2  -6   0   34.53    6.45 
   2  -6   0   52.86    6.57 
  -2  -6   0   43.19    5.52 
   2  -6   0   56.72    5.80 
  -2  -6   0   47.33    6.19 
  -2  -6   0   52.30    5.14 
   2  -6   0   63.70    5.76 
   2  -6   0   56.32    5.95 
  -2  -6   0   45.56    5.80 
  -2  -6   0   48.50    5.53 
   2  -6   0   40.37    7.07 
   2  -6   0   49.41    4.87 
  -2  -6   0   52.85    6.25 
   2   6   0   60.78    5.81 
   2   6   0   48.65    5.75 
   2   6   0   51.13    6.30 
   2   6   0   57.18    7.40 
   2   6   0   50.10    5.39 
  -2   6   0   57.34    7.87 
   2   6   0   39.00    5.22 
  -2   6   0   43.14    4.57 
  -2   6   0   38.55    6.23 
   2   6   0   50.29    5.57 
   2   6   0   53.53    5.51 
  -2   6   0   51.87    7.32 
  -2   6   0   56.46    5.09 
  -2   6   0   52.61    8.87 
   2   6   0   55.06    5.44 
  -2   6   0   53.34    6.55 
  -2   6   0   43.67    5.27 
  -2   6   0   51.34    5.44 
  -2   6   0   55.78    6.92 
  -3  -6   0   11.54    3.40 
  -3  -6   0   26.79    3.63 
   3  -6   0   21.85    2.37 
   3  -6   0   13.43    4.75 
  -3  -6   0   22.20    3.82 
  -3  -6   0   19.24    3.31 
   3  -6   0   22.81    4.63 
  -3  -6   0   24.63    3.87 
   3  -6   0   24.94    3.83 
   3  -6   0   19.76    2.71 
   3  -6   0   20.88    4.69 
   3  -6   0    8.57    4.07 
   3  -6   0   20.54    3.43 
  -3  -6   0   25.94    3.69 
   3  -6   0   17.89    3.56 
   3  -6   0   17.07    3.47 
  -3  -6   0   18.04    3.27 
   3   6   0   19.01    4.29 
  -3   6   0    8.47    3.75 
  -3   6   0   19.17    3.48 
  -3   6   0    6.14    4.31 
   3   6   0   22.30    3.51 
   3   6   0   23.81    3.97 
  -3   6   0   15.46    3.22 
   3   6   0   26.75    3.28 
  -3   6   0   10.44    4.53 
   3   6   0   17.88    3.39 
  -3   6   0    9.59    5.23 
   3   6   0   25.16    4.05 
  -3   6   0   27.30    4.90 
   3   6   0   30.57    4.25 
   3   6   0   22.51    3.60 
  -3   6   0   23.75    3.34 
  -3   6   0   15.89    4.34 
  -3   6   0   30.89    3.77 
   3   6   0   18.86    3.51 
   3   6   0   24.25    3.56 
  -4  -6   0    1.81    2.24 
  -4  -6   0    2.28    2.30 
   4  -6   0    3.58    2.21 
   4  -6   0   -1.73    3.06 
  -4  -6   0    3.43    1.94 
  -4  -6   0    2.83    2.04 
  -4  -6   0    0.90    2.15 
  -4  -6   0    3.12    2.11 
   4  -6   0   10.60    3.56 
   4  -6   0    8.55    3.82 
   4  -6   0    0.80    1.96 
  -4  -6   0    3.41    2.25 
   4  -6   0    1.41    2.75 
   4  -6   0    0.33    2.75 
   4  -6   0    1.55    2.13 
  -4  -6   0    2.31    1.84 
   4  -6   0    1.99    2.07 
   4   6   0    0.81    2.23 
   4   6   0    5.23    2.12 
  -4   6   0    4.30    3.96 
   4   6   0    2.44    1.65 
   4   6   0    2.81    2.07 
  -4   6   0    3.07    2.25 
   4   6   0    5.40    2.34 
   4   6   0    3.65    2.48 
  -4   6   0    4.99    3.09 
  -4   6   0    3.10    2.36 
  -4   6   0    3.65    2.51 
  -4   6   0    5.51    3.30 
  -4   6   0    1.14    3.51 
   4   6   0    5.58    2.03 
  -4   6   0    4.21    3.68 
   4   6   0    3.29    1.89 
  -4   6   0    0.96    2.81 
   4   6   0   -0.17    1.46 
  -4   6   0    2.53    2.18 
   4   6   0    0.47    2.22 
  -4   6   0    5.56    2.32 
  -5  -6   0   13.17    2.91 
   5  -6   0   21.07    3.69 
   5  -6   0   22.84    3.99 
   5  -6   0   16.45    3.82 
  -5  -6   0   17.89    3.64 
  -5  -6   0   13.79    3.53 
   5  -6   0   15.40    4.23 
  -5  -6   0   22.40    3.45 
  -5  -6   0   19.71    3.15 
  -5  -6   0   16.00    3.00 
   5  -6   0   19.31    3.81 
   5  -6   0   17.52    4.41 
  -5  -6   0   15.55    3.02 
  -5  -6   0   14.57    3.56 
   5  -6   0   14.46    3.37 
  -5  -6   0   16.55    3.75 
   5  -6   0   19.48    4.19 
   5  -6   0   24.12    4.59 
  -5   6   0   22.59    3.75 
   5   6   0   14.89    3.30 
  -5   6   0   11.25    4.71 
  -5   6   0   17.22    4.30 
  -5   6   0   20.87    3.93 
   5   6   0   15.53    2.81 
  -5   6   0   18.57    5.48 
   5   6   0   21.86    3.00 
  -5   6   0   14.11    3.70 
  -5   6   0   20.14    4.45 
   5   6   0   10.78    2.93 
  -5   6   0   19.85    5.70 
   5   6   0   13.38    3.04 
   5   6   0   21.00    3.61 
   5   6   0   16.69    3.70 
   5   6   0   23.13    4.20 
  -5   6   0   22.76    3.79 
   5   6   0   15.04    3.23 
  -5   6   0   18.02    4.57 
   5   6   0   22.32    3.68 
   6  -6   0    8.77    2.99 
  -6  -6   0    8.98    2.75 
  -6  -6   0    5.13    2.99 
  -6  -6   0   11.53    2.77 
   6  -6   0   16.29    4.41 
   6  -6   0    5.96    3.06 
   6  -6   0    9.66    3.99 
  -6  -6   0   11.06    3.40 
   6  -6   0   10.80    3.21 
  -6  -6   0   16.54    3.56 
   6  -6   0   10.10    3.75 
  -6  -6   0   12.58    2.95 
  -6  -6   0    8.60    3.40 
   6  -6   0   15.50    3.41 
   6  -6   0    6.25    3.09 
  -6  -6   0   13.02    2.60 
   6  -6   0   15.35    4.11 
   6  -6   0    9.99    3.52 
  -6  -6   0    8.65    2.81 
   6   6   0   11.26    2.43 
   6   6   0   18.57    3.98 
   6   6   0   12.01    2.50 
  -6   6   0    7.37    3.42 
  -6   6   0   15.51    5.56 
   6   6   0    8.48    2.77 
  -6   6   0    8.49    2.89 
   6   6   0   14.16    3.16 
  -6   6   0   10.19    3.55 
  -6   6   0   11.64    4.02 
   6   6   0   11.78    3.13 
   6   6   0   10.06    2.78 
   6   6   0   12.40    3.04 
  -6   6   0   15.56    5.08 
  -6   6   0   14.20    3.73 
  -6   6   0    8.16    3.45 
  -6   6   0    9.78    3.19 
  -6   6   0    4.85    4.22 
   6   6   0   12.64    2.89 
  -6   6   0    7.61    3.62 
   7  -6   0   31.85    5.36 
   7  -6   0   35.95    5.71 
   7  -6   0   22.19    4.74 
   7  -6   0   25.31    4.88 
   7  -6   0   29.27    5.21 
  -7  -6   0   31.92    5.50 
   7  -6   0   37.66    5.33 
  -7  -6   0   39.63    5.45 
   7  -6   0   28.53    5.37 
  -7  -6   0   35.43    4.97 
   7  -6   0   30.50    4.87 
  -7  -6   0   31.25    4.57 
   7  -6   0   32.37    5.46 
  -7  -6   0   37.73    4.82 
   7  -6   0   34.31    4.95 
  -7  -6   0   21.62    4.20 
   7  -6   0   28.51    4.57 
  -7  -6   0   24.42    4.82 
  -7  -6   0   23.55    4.99 
   7  -6   0   36.08    5.93 
  -7   6   0   34.84    6.20 
  -7   6   0   27.86    6.64 
  -7   6   0   29.32    4.87 
   7   6   0   33.48    4.66 
   7   6   0   33.68    5.66 
   7   6   0   31.31    4.34 
  -7   6   0   29.12    6.63 
  -7   6   0   36.35    5.01 
  -7   6   0   32.93    5.63 
  -7   6   0   37.95    6.02 
  -7   6   0   30.76    5.23 
  -7   6   0   22.99    5.01 
   7   6   0   26.69    4.29 
   7   6   0   31.73    4.73 
  -7   6   0   20.08    6.06 
  -7   6   0   28.99    5.92 
   7   6   0   28.64    4.59 
  -8  -6   0    5.58    3.19 
  -8  -6   0    8.51    3.76 
   8  -6   0    7.34    4.06 
   8  -6   0    1.96    2.90 
  -8  -6   0    3.98    2.82 
   8  -6   0    5.49    3.71 
   8  -6   0    8.07    3.45 
   8  -6   0    4.68    3.59 
   8  -6   0    9.70    3.76 
  -8  -6   0    4.43    3.10 
   8  -6   0   13.78    4.29 
  -8  -6   0    7.79    3.64 
   8  -6   0   -0.41    2.83 
  -8  -6   0    3.06    3.13 
  -8  -6   0    6.69    2.88 
  -8  -6   0    4.17    4.34 
   8   6   0    6.33    3.54 
  -8   6   0    0.61    4.02 
  -8   6   0    2.99    3.13 
   8   6   0    7.35    2.85 
   8   6   0    2.51    2.33 
  -8   6   0    0.21    4.64 
  -8   6   0   15.03    4.78 
  -8   6   0    4.24    3.94 
   8   6   0    1.37    3.27 
  -8   6   0   -4.32    3.29 
  -8   6   0   -0.76    4.83 
  -8   6   0    9.62    4.20 
   8   6   0    6.26    3.02 
  -8   6   0    1.03    4.51 
  -8   6   0   10.17    4.14 
   8   6   0    7.81    2.73 
  -8   6   0    6.01    4.28 
   0  -7   0   -0.28    2.02 
   0  -7   0   -0.36    3.01 
   0  -7   0   -1.39    4.36 
   0  -7   0    0.15    2.04 
   0  -7   0   -3.31    2.92 
   0  -7   0    2.35    2.76 
   0  -7   0    0.24    2.76 
   0  -7   0   -1.45    2.86 
   0  -7   0    4.24    2.21 
   0  -7   0    0.22    1.91 
   0  -7   0    2.66    2.23 
   0   7   0   -2.13    2.55 
   0   7   0   -1.90    2.17 
   0   7   0    2.70    2.43 
   0   7   0    1.93    2.33 
   0   7   0    2.20    3.51 
   0   7   0   -2.44    1.95 
   0   7   0   -0.20    1.44 
   0   7   0    0.33    2.29 
   0   7   0   -2.91    1.90 
   0   7   0    0.27    1.38 
   0   7   0    1.12    1.95 
   0   7   0   -0.48    2.83 
   0   7   0    1.42    1.95 
  -1  -7   0    2.88    2.50 
   1  -7   0   -0.32    1.94 
   1  -7   0    2.26    2.42 
   1  -7   0   -1.41    2.89 
   1  -7   0    3.18    3.04 
  -1  -7   0    0.63    1.99 
  -1  -7   0   -1.09    2.07 
  -1  -7   0   -0.41    2.53 
  -1  -7   0    0.93    2.08 
   1  -7   0   -1.36    3.58 
   1  -7   0   -0.20    3.79 
  -1  -7   0    0.43    2.94 
  -1  -7   0    1.00    2.01 
   1  -7   0   -0.02    2.07 
   1  -7   0    3.42    2.38 
   1  -7   0    1.05    3.44 
  -1  -7   0    0.50    3.07 
  -1  -7   0   -4.11    3.00 
  -1   7   0   -0.78    2.07 
   1   7   0   -4.87    2.65 
   1   7   0    2.42    2.32 
  -1   7   0    2.48    2.54 
  -1   7   0   -0.05    3.25 
  -1   7   0    2.75    3.20 
   1   7   0    3.98    3.58 
  -1   7   0    1.52    2.73 
   1   7   0    3.81    2.46 
   1   7   0   -0.36    2.49 
   1   7   0   -0.49    2.21 
   1   7   0   -1.57    2.05 
   1   7   0    1.39    1.36 
   1   7   0   -0.75    3.17 
  -1   7   0    0.60    2.03 
  -1   7   0    1.02    1.69 
   1   7   0   -1.12    2.08 
   1   7   0   -3.00    1.02 
   1   7   0    1.92    2.30 
   1   7   0    1.58    2.13 
  -1   7   0   -1.03    2.23 
  -1   7   0    3.29    3.45 
  -1   7   0    0.49    1.54 
  -2  -7   0    5.61    2.34 
  -2  -7   0    3.86    3.22 
   2  -7   0    1.08    2.55 
  -2  -7   0    9.77    2.87 
   2  -7   0    8.43    2.38 
  -2  -7   0    8.49    2.72 
   2  -7   0    5.18    2.67 
  -2  -7   0    3.84    2.84 
  -2  -7   0    2.72    2.18 
   2  -7   0    5.33    3.33 
   2  -7   0    3.09    4.13 
   2  -7   0    4.90    1.59 
  -2  -7   0   -2.97    2.63 
   2  -7   0    6.82    3.00 
   2  -7   0    2.17    3.29 
   2  -7   0    2.65    3.48 
  -2  -7   0    7.49    2.53 
   2  -7   0    6.01    2.69 
  -2  -7   0    1.93    2.14 
  -2   7   0    5.37    4.16 
   2   7   0    0.38    2.25 
   2   7   0    4.51    2.54 
   2   7   0    6.12    2.86 
   2   7   0   -4.02    2.34 
  -2   7   0    2.79    2.06 
   2   7   0    3.12    2.63 
   2   7   0    7.30    2.48 
  -2   7   0    6.50    3.43 
  -2   7   0    2.65    2.57 
   2   7   0    5.21    2.56 
  -2   7   0    4.47    3.85 
  -2   7   0    5.78    2.67 
   2   7   0    1.75    3.63 
  -2   7   0    2.57    2.55 
  -2   7   0    4.12    2.32 
   2   7   0    4.18    2.39 
   2   7   0    5.06    2.66 
   2   7   0    2.23    1.43 
  -3  -7   0   11.60    3.02 
   3  -7   0   11.41    4.29 
  -3  -7   0   12.64    3.06 
   3  -7   0    6.71    3.77 
  -3  -7   0   14.46    4.07 
  -3  -7   0   15.36    3.51 
  -3  -7   0   17.46    3.14 
   3  -7   0   15.72    3.45 
   3  -7   0    7.79    2.99 
   3  -7   0   13.64    4.59 
   3  -7   0   10.46    3.19 
   3  -7   0   19.78    5.80 
   3  -7   0   18.16    3.70 
  -3  -7   0    7.07    2.72 
  -3  -7   0   12.40    3.96 
   3  -7   0   12.17    4.65 
   3  -7   0   10.93    2.39 
  -3  -7   0    4.82    3.30 
   3   7   0    9.81    2.99 
   3   7   0   10.99    2.77 
   3   7   0   12.25    4.34 
   3   7   0    3.37    2.42 
  -3   7   0   10.52    3.00 
  -3   7   0    3.82    4.05 
   3   7   0    9.97    3.30 
  -3   7   0    6.11    2.96 
  -3   7   0   10.85    3.85 
  -3   7   0   11.73    4.32 
   3   7   0   12.45    3.06 
  -3   7   0    7.81    4.96 
   3   7   0   14.92    2.97 
  -3   7   0   13.60    2.97 
  -3   7   0   15.78    4.51 
  -3   7   0    5.63    4.02 
   3   7   0    9.93    3.49 
  -3   7   0    7.67    3.02 
   3   7   0   11.15    3.25 
   3   7   0    7.97    3.10 
  -4  -7   0   18.19    3.68 
  -4  -7   0   24.17    4.65 
  -4  -7   0   11.33    3.51 
  -4  -7   0   12.90    3.10 
  -4  -7   0   18.83    3.45 
   4  -7   0   13.25    3.45 
   4  -7   0    9.96    4.20 
   4  -7   0   17.15    4.41 
   4  -7   0   16.66    3.79 
   4  -7   0   16.61    5.29 
  -4  -7   0   17.80    3.42 
  -4  -7   0   15.11    3.76 
   4  -7   0    9.19    3.44 
   4  -7   0   15.81    5.36 
   4  -7   0   15.95    3.18 
   4  -7   0   12.07    3.56 
   4  -7   0   19.13    4.85 
   4   7   0   17.38    2.91 
  -4   7   0   19.85    4.83 
  -4   7   0   19.13    3.94 
  -4   7   0   14.57    3.43 
  -4   7   0   10.92    3.13 
   4   7   0   14.52    3.22 
   4   7   0   25.76    4.12 
   4   7   0   20.40    3.55 
  -4   7   0   12.77    3.47 
   4   7   0   17.36    4.16 
  -4   7   0   14.72    3.47 
   4   7   0   10.98    3.43 
   4   7   0   21.47    3.93 
  -4   7   0   20.26    4.84 
   4   7   0   18.89    3.66 
  -4   7   0   16.59    5.36 
  -4   7   0   11.32    5.40 
  -4   7   0    1.64    4.94 
   4   7   0   21.16    4.14 
  -4   7   0   14.65    4.86 
   5  -7   0   96.30    8.82 
  -5  -7   0   91.23    9.00 
   5  -7   0   81.92    9.91 
   5  -7   0   83.57   10.31 
   5  -7   0   86.40    8.22 
  -5  -7   0  100.61    8.23 
   5  -7   0   91.79    8.88 
  -5  -7   0   82.99    8.94 
   5  -7   0  100.34   10.16 
  -5  -7   0   97.99    8.80 
   5  -7   0   94.01    9.14 
  -5  -7   0   81.79    7.91 
  -5  -7   0  102.87    8.02 
   5  -7   0  103.11    8.84 
  -5  -7   0   76.14    9.07 
   5  -7   0   86.62    9.37 
   5  -7   0  115.49   11.55 
   5   7   0  102.79    7.85 
   5   7   0   84.62    7.69 
   5   7   0  104.81    9.30 
   5   7   0   98.22    8.44 
  -5   7   0   86.84    8.19 
  -5   7   0   80.80   10.07 
   5   7   0   95.82    8.27 
   5   7   0   94.19    8.41 
  -5   7   0   57.20   12.16 
  -5   7   0   87.07    8.84 
  -5   7   0   47.47    9.72 
   5   7   0   82.80    8.04 
   5   7   0  105.15    8.88 
  -5   7   0   82.29    8.34 
   5   7   0  101.93    7.55 
  -5   7   0   96.55    8.75 
  -5   7   0   70.94   11.02 
   5   7   0  102.81    9.01 
  -5   7   0   92.42   10.66 
  -5   7   0   81.19   10.48 
   6  -7   0   62.22    7.33 
  -6  -7   0   60.87    6.84 
  -6  -7   0   57.70    7.35 
   6  -7   0   55.87    7.56 
   6  -7   0   65.05    7.68 
  -6  -7   0   64.10    7.63 
   6  -7   0   73.25    7.66 
   6  -7   0   76.48    7.81 
  -6  -7   0   58.74    7.63 
  -6  -7   0   70.35    7.50 
   6  -7   0   56.68    7.36 
   6  -7   0   56.28    8.42 
   6  -7   0   59.97    8.39 
   6  -7   0   70.64    8.80 
  -6  -7   0   70.40    6.98 
   6  -7   0   58.19    8.18 
  -6  -7   0   73.02    8.52 
  -6   7   0   62.15    8.32 
  -6   7   0   66.95    7.23 
  -6   7   0   58.83    7.52 
   6   7   0   70.09    7.26 
   6   7   0   49.73    7.27 
   6   7   0   78.86    7.86 
  -6   7   0   59.48    7.49 
  -6   7   0   65.52    7.20 
  -6   7   0   68.80    7.68 
   6   7   0   69.14    7.30 
  -6   7   0   67.91    9.22 
   6   7   0   69.63    7.22 
   6   7   0   79.02    6.90 
  -6   7   0   60.14   10.06 
  -6   7   0   66.51   10.44 
  -6   7   0   42.89    8.88 
  -6   7   0   76.07    9.05 
   7  -7   0   63.31    7.23 
   7  -7   0   39.86    7.32 
   7  -7   0   45.92    6.31 
   7  -7   0   69.41    8.81 
  -7  -7   0   56.30    7.56 
   7  -7   0   63.65    7.98 
  -7  -7   0   43.89    6.09 
   7  -7   0   43.67    6.58 
   7  -7   0   29.89    6.28 
   7  -7   0   64.40    8.29 
  -7  -7   0   56.52    7.17 
  -7  -7   0   61.24    7.26 
  -7  -7   0   60.30    6.63 
  -7  -7   0   45.03    7.06 
   7  -7   0   47.30    6.92 
  -7   7   0   63.87    9.07 
   7   7   0   57.07    6.78 
  -7   7   0   54.34    7.23 
  -7   7   0   40.29    8.52 
  -7   7   0   59.80    6.88 
  -7   7   0   43.26    7.41 
   7   7   0   52.29    6.27 
   7   7   0   64.62    7.77 
  -7   7   0   47.91    9.05 
  -7   7   0   46.72    6.40 
  -7   7   0   42.94    6.75 
   7   7   0   58.87    6.78 
  -7   7   0   65.80    8.41 
  -7   7   0   42.31    6.68 
  -7   7   0   45.48    8.90 
   0  -8   0  308.16   21.18 
   0  -8   0  297.77   22.01 
   0  -8   0  263.08   22.72 
   0  -8   0  277.77   21.34 
   0  -8   0  280.58   20.72 
   0  -8   0  278.71   21.83 
   0  -8   0  292.42   21.16 
   0  -8   0  291.43   23.23 
   0  -8   0  280.88   21.13 
   0  -8   0  286.82   23.53 
   0  -8   0  329.03   22.47 
   0   8   0  271.78   20.84 
   0   8   0  328.68   20.88 
   0   8   0  276.69   21.08 
   0   8   0  345.84   23.54 
   0   8   0  314.49   23.32 
   0   8   0  336.55   22.04 
   0   8   0  331.06   23.13 
   0   8   0  243.74   20.98 
   0   8   0  295.25   21.07 
   0   8   0  287.15   21.07 
   0   8   0  281.71   20.35 
   0   8   0  268.38   21.02 
  -1  -8   0   28.34    4.50 
   1  -8   0   31.64    6.59 
   1  -8   0   34.32    5.01 
  -1  -8   0   28.21    4.54 
   1  -8   0   26.88    4.58 
   1  -8   0   32.20    6.46 
   1  -8   0   24.97    4.41 
  -1  -8   0   27.93    5.66 
   1  -8   0   25.62    4.64 
  -1  -8   0   30.12    4.22 
  -1  -8   0   21.21    7.39 
  -1  -8   0   25.19    4.70 
   1  -8   0   35.73    5.51 
  -1  -8   0   10.26    5.03 
  -1  -8   0   25.45    5.32 
  -1  -8   0   23.95    6.05 
  -1  -8   0   17.82    4.92 
  -1  -8   0   29.72    4.50 
   1  -8   0   27.14    5.93 
  -1  -8   0   30.26    4.72 
   1   8   0   21.08    4.95 
  -1   8   0   19.91    3.34 
   1   8   0   25.10    3.39 
   1   8   0   18.53    4.21 
   1   8   0   35.56    4.97 
  -1   8   0   34.20    6.43 
   1   8   0   21.38    5.81 
  -1   8   0   30.95    5.91 
   1   8   0   26.90    6.60 
  -1   8   0   33.48    4.93 
   1   8   0   18.92    4.01 
   1   8   0   36.40    5.14 
   1   8   0   21.57    4.19 
  -1   8   0   26.70    4.27 
  -1   8   0   16.88    3.98 
   1   8   0   31.49    4.75 
  -1   8   0   29.13    4.44 
  -1   8   0   27.63    5.40 
   1   8   0   24.80    4.33 
  -1   8   0   29.55    4.48 
   2  -8   0   74.28    8.21 
  -2  -8   0   95.14   10.05 
  -2  -8   0   78.87    7.99 
  -2  -8   0   51.31    8.77 
   2  -8   0   65.09    7.78 
   2  -8   0   74.36    8.43 
   2  -8   0   78.96    9.88 
  -2  -8   0   71.11    7.20 
   2  -8   0   80.30    9.14 
   2  -8   0   63.16    7.82 
  -2  -8   0   64.56    8.70 
  -2  -8   0   82.39    7.93 
  -2  -8   0   86.96    9.78 
   2  -8   0   80.00    8.44 
  -2  -8   0   78.03    8.28 
   2  -8   0   85.93    9.99 
  -2  -8   0   80.66    7.25 
  -2  -8   0   82.80    7.60 
   2   8   0   72.87    7.54 
   2   8   0   85.91    8.60 
   2   8   0   81.97    7.61 
   2   8   0   88.25   11.16 
  -2   8   0   81.24    9.80 
   2   8   0   85.98    8.38 
  -2   8   0   54.25    7.40 
   2   8   0   70.25    7.62 
  -2   8   0   63.66    6.90 
  -2   8   0  100.58    9.88 
  -2   8   0   80.63    6.67 
   2   8   0   69.92    7.97 
   2   8   0   54.67    7.60 
  -2   8   0   78.88   10.32 
   2   8   0   71.26    7.82 
  -2   8   0   87.67    7.97 
   2   8   0   58.86    8.64 
  -2   8   0   61.52    7.35 
  -2   8   0   98.73   10.07 
   3  -8   0    9.55    4.27 
   3  -8   0    0.61    2.83 
   3  -8   0    6.36    2.84 
  -3  -8   0    3.34    2.75 
   3  -8   0    1.23    2.55 
  -3  -8   0   11.70    4.23 
   3  -8   0    0.83    3.82 
   3  -8   0    7.77    4.70 
  -3  -8   0    4.03    2.52 
  -3  -8   0    5.71    3.52 
   3  -8   0    5.20    4.46 
   3  -8   0    1.09    2.92 
  -3  -8   0    3.51    2.76 
  -3  -8   0    5.05    3.85 
  -3  -8   0    6.24    2.89 
  -3  -8   0    2.49    2.47 
   3  -8   0   -1.19    3.71 
  -3   8   0    3.35    3.63 
  -3   8   0    7.66    4.30 
   3   8   0    6.90    4.09 
  -3   8   0    3.15    3.76 
   3   8   0    1.96    2.67 
  -3   8   0    5.02    2.91 
  -3   8   0    4.28    2.61 
   3   8   0   -0.15    2.45 
  -3   8   0   10.13    3.66 
   3   8   0   -0.39    2.64 
   3   8   0    3.09    3.30 
  -3   8   0    7.00    5.74 
   3   8   0    1.08    2.52 
  -3   8   0    8.56    3.45 
   3   8   0    7.16    2.95 
  -3   8   0    1.78    2.82 
   3   8   0    1.33    2.82 
   3   8   0    3.94    2.92 
   3   8   0    5.54    2.70 
  -4  -8   0   20.85    4.08 
   4  -8   0   23.82    6.06 
  -4  -8   0   25.65    4.56 
  -4  -8   0   30.08    5.36 
   4  -8   0   26.66    6.34 
   4  -8   0   32.60    6.70 
   4  -8   0   15.94    5.99 
  -4  -8   0   24.22    4.70 
  -4  -8   0   40.74    6.00 
   4  -8   0   24.32    5.00 
   4  -8   0   22.30    4.89 
   4  -8   0   25.26    4.72 
  -4  -8   0   29.77    5.76 
  -4  -8   0   29.61    5.62 
   4  -8   0   22.18    5.00 
  -4   8   0   29.18    4.75 
   4   8   0   24.54    4.95 
  -4   8   0   27.55    4.43 
   4   8   0   31.76    5.40 
   4   8   0   28.56    5.02 
  -4   8   0   15.36    4.33 
  -4   8   0   19.75    5.37 
  -4   8   0   28.87    4.51 
   4   8   0   28.07    4.43 
   4   8   0   30.27    4.83 
  -4   8   0   35.26    5.23 
  -4   8   0   16.87    5.48 
  -4   8   0   33.32    6.69 
   4   8   0   29.34    5.09 
   4   8   0   31.03    4.66 
   4   8   0   21.73    4.57 
  -4   8   0   27.39    6.65 
  -4   8   0   27.46    6.74 
   4   8   0   27.55    5.29 
   5  -8   0    2.55    3.19 
   5  -8   0    4.01    5.17 
   5  -8   0    2.79    4.23 
   5  -8   0    3.10    3.35 
   5  -8   0    1.53    2.98 
  -5  -8   0    9.40    3.92 
   5  -8   0   -1.35    2.47 
  -5  -8   0    3.60    2.50 
   5  -8   0    4.49    4.16 
  -5  -8   0    2.78    3.27 
  -5  -8   0    1.11    2.75 
   5  -8   0    9.19    4.71 
  -5  -8   0    6.93    3.46 
   5   8   0   12.07    3.63 
   5   8   0    5.51    3.12 
   5   8   0    4.58    3.05 
  -5   8   0    1.95    2.88 
  -5   8   0    1.12    3.41 
  -5   8   0    2.36    4.31 
  -5   8   0    4.12    4.70 
   5   8   0    0.03    2.99 
  -5   8   0    2.21    3.77 
  -5   8   0    2.65    4.75 
   5   8   0    6.02    2.72 
   5   8   0    5.66    2.78 
  -5   8   0    2.74    3.79 
  -5   8   0    2.94    3.20 
  -5   8   0    4.31    3.27 
   5   8   0    1.85    3.17 
  -5   8   0    6.79    3.57 
   5   8   0    1.21    2.67 
  -6  -8   0   47.92    6.64 
   6  -8   0   29.04    5.67 
   6  -8   0   42.27    6.15 
   6  -8   0   39.11    7.56 
  -6  -8   0   40.40    6.16 
   6  -8   0   34.32    7.22 
  -6  -8   0   36.44    6.10 
   6  -8   0   43.33    7.85 
   6  -8   0   34.45    5.52 
  -6  -8   0   32.20    5.45 
   6  -8   0   34.80    6.05 
  -6  -8   0   39.96    6.82 
  -6   8   0   17.64    6.61 
   6   8   0   35.59    5.68 
  -6   8   0   28.11    5.55 
  -6   8   0   39.53    6.20 
   6   8   0   40.80    6.55 
  -6   8   0   39.35    7.77 
   6   8   0   43.14    6.33 
  -6   8   0   14.31    6.47 
  -6   8   0   47.13    5.93 
  -6   8   0   41.13    7.81 
  -6   8   0   28.95    8.09 
  -6   8   0   39.78   10.17 
  -6   8   0   39.05    5.83 
   6   8   0   38.72    5.61 
  -6   8   0   47.48    6.20 
   6   8   0   28.04    4.95 
   0  -9   0    6.22    5.29 
   0  -9   0   -0.02    2.64 
   0  -9   0   -3.10    3.00 
   0  -9   0    0.82    2.60 
   0  -9   0    0.93    4.28 
   0  -9   0    2.67    2.86 
   0  -9   0    3.85    3.82 
   0  -9   0    4.03    3.47 
   0  -9   0   -4.73    2.34 
   0  -9   0    6.56    4.21 
   0   9   0   -0.17    3.76 
   0   9   0   -0.39    2.41 
   0   9   0   -2.41    2.27 
   0   9   0    2.14    2.71 
   0   9   0    1.09    2.88 
   0   9   0    0.22    2.45 
   0   9   0    3.49    2.99 
   0   9   0    1.03    3.50 
   0   9   0    1.81    2.50 
   0   9   0    3.44    3.80 
   0   9   0    0.76    2.16 
   1  -9   0    0.49    3.04 
  -1  -9   0    1.01    4.12 
  -1  -9   0    0.60    2.35 
  -1  -9   0    5.70    2.94 
  -1  -9   0    6.71    3.80 
   1  -9   0   -2.65    2.19 
   1  -9   0   -3.54    2.80 
  -1  -9   0    2.16    5.69 
   1  -9   0   -7.41    3.57 
  -1  -9   0   -0.79    3.44 
  -1  -9   0   -2.34    2.50 
  -1  -9   0    1.12    2.70 
   1  -9   0    0.15    2.51 
   1  -9   0    3.80    3.38 
   1  -9   0    1.60    2.77 
   1  -9   0   -0.65    4.05 
  -1  -9   0    0.25    2.71 
  -1  -9   0    1.14    3.73 
  -1  -9   0    2.82    4.42 
  -1  -9   0    2.06    2.55 
  -1   9   0   -0.19    2.05 
  -1   9   0    0.44    3.48 
   1   9   0   -3.30    2.37 
  -1   9   0   -2.29    2.50 
   1   9   0    3.61    2.80 
   1   9   0   -1.05    2.48 
  -1   9   0    2.75    2.82 
  -1   9   0    0.42    2.09 
   1   9   0   -2.51    3.19 
  -1   9   0    0.05    2.69 
   1   9   0    1.42    2.69 
  -1   9   0   -0.38    2.33 
   1   9   0   -0.74    2.30 
   1   9   0   -3.89    3.72 
  -1   9   0    7.33    3.89 
  -1   9   0   -0.96    2.46 
  -1   9   0   -3.15    3.32 
   1   9   0    0.48    2.89 
   1   9   0    2.62    2.77 
   1   9   0    0.17    2.76 
   2  -9   0    1.24    3.18 
   2  -9   0   -2.98    2.76 
  -2  -9   0    1.82    2.81 
  -2  -9   0    4.40    4.07 
   2  -9   0    0.88    2.40 
  -2  -9   0    6.05    3.99 
  -2  -9   0   -3.32    3.11 
  -2  -9   0    4.78    2.85 
  -2  -9   0    1.98    4.33 
   2  -9   0    3.93    3.31 
  -2  -9   0   -0.79    2.65 
   2  -9   0    4.40    3.95 
   2  -9   0    3.88    3.35 
  -2  -9   0    6.61    3.26 
   2  -9   0    6.25    3.17 
   2  -9   0    2.71    3.90 
   2   9   0    1.71    3.03 
   2   9   0   -1.96    3.87 
  -2   9   0   -2.21    2.63 
  -2   9   0   -3.59    3.22 
   2   9   0    2.93    2.83 
   2   9   0    0.43    3.50 
   2   9   0    2.91    3.03 
  -2   9   0    0.48    2.56 
  -2   9   0    8.50    2.89 
  -2   9   0    0.36    3.03 
  -2   9   0   -0.71    2.73 
   2   9   0    5.37    3.09 
   2   9   0    3.32    3.02 
  -2   9   0    3.83    3.87 
   2   9   0   -0.27    2.59 
   2   9   0    7.14    3.12 
  -2   9   0    1.09    3.30 
  -3  -9   0    8.78    3.64 
  -3  -9   0    7.72    3.26 
   3  -9   0    2.31    3.28 
   3  -9   0    8.43    3.80 
  -3  -9   0   12.32    5.36 
  -3  -9   0    2.36    2.91 
  -3  -9   0    9.75    3.28 
   3  -9   0   15.49    5.34 
   3  -9   0   13.91    4.97 
  -3  -9   0   10.15    4.82 
  -3  -9   0   -2.11    4.26 
   3  -9   0   -2.38    4.35 
   3  -9   0   12.04    3.75 
   3  -9   0    4.33    3.78 
   3  -9   0    6.96    4.57 
   3   9   0   11.96    3.50 
   3   9   0    9.55    3.59 
   3   9   0    4.46    4.30 
   3   9   0    5.13    3.11 
   3   9   0    9.28    3.67 
   3   9   0    4.99    3.13 
  -3   9   0    4.22    3.60 
  -3   9   0    5.07    3.41 
   3   9   0   10.90    3.68 
   3   9   0   13.68    4.81 
  -3   9   0   16.67    5.38 
  -3   9   0   10.20    4.66 
  -3   9   0    6.18    3.18 
  -3   9   0   10.25    4.69 
  -3   9   0    4.60    3.30 
   3   9   0    3.96    3.33 
  -4  -9   0    0.15    2.74 
  -4  -9   0    7.86    4.48 
   4  -9   0   -6.26    4.18 
   4  -9   0   -2.35    3.26 
   4  -9   0    0.85    2.93 
   4  -9   0    2.25    4.93 
   4  -9   0    0.71    3.76 
  -4  -9   0    6.80    4.39 
  -4  -9   0    8.93    4.55 
  -4  -9   0    0.13    2.74 
  -4  -9   0    2.29    3.00 
   4  -9   0   -9.65    3.93 
   4  -9   0    0.75    4.35 
   4  -9   0    0.80    3.08 
  -4  -9   0    1.96    3.07 
  -4   9   0   -0.56    2.73 
   4   9   0   -1.02    2.90 
   4   9   0    1.41    2.82 
   4   9   0    1.87    3.36 
  -4   9   0    2.18    3.91 
   4   9   0    0.79    2.82 
  -4   9   0   -4.86    2.98 
   4   9   0   -1.48    3.09 
  -4   9   0   -2.98    3.17 
  -4   9   0    1.15    3.39 
  -4   9   0   -3.66    3.67 
   4   9   0    7.08    3.20 
   4   9   0   -0.13    3.66 
   4   9   0   -2.95    2.54 
  -4   9   0    6.25    4.91 
   5  -9   0   61.82    8.84 
   5  -9   0   93.17    9.86 
   5  -9   0   81.70   11.72 
  -5  -9   0  103.97   11.39 
   5  -9   0   81.47    9.76 
   5  -9   0   73.52   10.49 
  -5  -9   0   89.85   10.37 
  -5  -9   0   76.77    9.33 
   5  -9   0   69.38    8.62 
  -5  -9   0   85.82    9.43 
   5  -9   0   70.76   10.94 
   5  -9   0   80.73   12.12 
  -5  -9   0   71.54    8.50 
  -5  -9   0   93.58   10.75 
   5   9   0   91.52    9.42 
  -5   9   0   80.56   10.98 
   5   9   0   81.20    9.46 
   5   9   0   76.82    9.88 
   5   9   0   95.99    8.58 
  -5   9   0   88.31    9.29 
  -5   9   0   72.88    8.20 
  -5   9   0   76.49    8.60 
   5   9   0   96.45   10.11 
  -5   9   0   79.99   11.44 
  -5   9   0   61.90   10.16 
   5   9   0   71.50    8.66 
  -5   9   0   94.89   12.91 
   5   9   0   71.23    8.80 
  -5   9   0   86.83    9.20 
   0 -10   0  132.79   12.34 
   0 -10   0  131.44   11.62 
   0 -10   0  122.75   13.73 
   0 -10   0  122.10   14.18 
   0 -10   0   87.36   11.22 
   0 -10   0  119.11   11.74 
   0 -10   0  128.66   11.66 
   0 -10   0  112.33   13.70 
   0  10   0  163.34   12.28 
   0  10   0  145.93   13.64 
   0  10   0  127.06   11.45 
   0  10   0  143.28   13.10 
   0  10   0  101.40   11.05 
   0  10   0  120.71   12.92 
   0  10   0  136.83   11.04 
  -1 -10   0   14.00    4.44 
  -1 -10   0   26.80    5.72 
  -1 -10   0   28.16    4.93 
   1 -10   0   20.61    6.04 
   1 -10   0   21.36    5.71 
   1 -10   0   19.78    5.45 
  -1 -10   0   15.53    5.13 
  -1 -10   0   17.74    4.34 
  -1 -10   0   15.79    5.63 
  -1 -10   0   18.06    6.25 
   1 -10   0   16.20    5.53 
  -1 -10   0   14.16    4.20 
   1 -10   0   10.09    3.88 
   1 -10   0   16.04    4.54 
  -1 -10   0   28.49    8.57 
   1 -10   0    8.21    4.19 
   1 -10   0   19.23    4.50 
   1  10   0   26.06    5.39 
   1  10   0   11.44    3.96 
   1  10   0   29.82    5.14 
  -1  10   0   19.82    5.55 
  -1  10   0   23.32    6.30 
  -1  10   0   26.17    4.42 
   1  10   0   24.70    6.17 
   1  10   0   15.76    5.86 
  -1  10   0   30.73    5.24 
  -1  10   0   24.10    4.85 
  -1  10   0   15.19    3.62 
  -1  10   0   31.81    5.98 
   1  10   0   12.85    4.15 
  -1  10   0   24.11    5.30 
   1  10   0   22.14    4.47 
   2 -10   0   47.65    7.59 
  -2 -10   0   37.57    6.05 
   2 -10   0   40.88    7.47 
  -2 -10   0   43.11    6.40 
   2 -10   0   24.63    5.33 
  -2 -10   0   23.13    7.32 
  -2 -10   0   46.00    6.36 
  -2 -10   0   32.71    7.17 
   2 -10   0   21.56    5.58 
  -2 -10   0   38.63    6.05 
  -2 -10   0   28.96    7.81 
   2 -10   0   43.84    6.42 
  -2 -10   0   46.87   10.96 
   2 -10   0   48.40    7.03 
   2 -10   0   43.32    6.94 
  -2 -10   0   58.34    8.41 
  -2  10   0   43.96    6.47 
   2  10   0   38.02    6.29 
  -2  10   0   43.15    7.50 
   2  10   0   27.08    5.37 
  -2  10   0   41.74    5.72 
  -2  10   0   42.59    6.53 
   2  10   0   61.80    6.92 
   2  10   0   41.52    8.53 
  -2  10   0   48.04    6.18 
   2  10   0   35.36    5.82 
  -2  10   0   49.06    7.53 
   2  10   0   42.73    6.32 
   2  10   0   38.20    6.85 
   2  10   0   52.28    6.40 
  -2  10   0   39.18    7.03 
  -2  10   0   42.53    6.04 
  -2  10   0   45.90    5.85 
   3 -10   0    2.00    3.62 
   3 -10   0   -0.16    3.82 
   3 -10   0    1.59    2.77 
   3 -10   0    8.39    4.86 
  -3 -10   0    7.12    5.14 
  -3 -10   0   -4.19    4.79 
   3 -10   0    0.15    2.91 
   3 -10   0    5.58    5.12 
   3 -10   0    3.49    4.64 
  -3 -10   0    2.20    3.23 
  -3 -10   0    1.30    4.55 
  -3 -10   0    3.08    3.08 
   3 -10   0    8.86    4.69 
  -3 -10   0   -1.63    2.94 
   3 -10   0    1.38    3.73 
  -3  10   0    2.36    3.01 
   3  10   0    2.86    3.25 
  -3  10   0    1.11    3.56 
  -3  10   0    3.17    3.88 
   3  10   0    2.21    4.65 
   3  10   0   -0.45    3.00 
  -3  10   0    4.40    4.22 
  -3  10   0   -0.89    4.04 
   3  10   0    5.19    4.10 
   3  10   0    1.24    3.92 
  -3  10   0    7.03    3.34 
  -3  10   0    2.98    3.89 
   3  10   0    1.66    3.43 
   3  10   0    1.40    3.21 
   3  10   0    5.27    3.85 
  10   0  -1   -1.14    2.87 
  10   0  -1    2.26    2.60 
 -10   0   1   -2.23    2.72 
 -10   0   1   -1.20    3.29 
  10   0  -1   -3.04    2.41 
  10   0  -1   -1.03    2.12 
  10   0  -1   -5.94    2.88 
  10   0  -1   -0.76    1.93 
 -10   0   1   -2.26    2.42 
 -10   0   1    3.17    2.84 
 -10   0   1    0.45    2.80 
  10   0  -1   -1.65    2.12 
 -10   0   1   -0.49    2.75 
 -10   0   1   -2.21    2.24 
 -10   0   1    7.49    3.45 
 -10   0   1   -0.47    2.81 
 -10   0   1   -1.25    2.63 
 -10   0   1    1.76    3.58 
  10   0  -1   -0.53    2.47 
  -9   0   1   90.05    8.25 
  -9   0   1   91.86    8.91 
  -9   0   1   73.56    8.66 
   9   0  -1   86.12    7.89 
  -9   0   1   76.89    9.13 
   9   0  -1   81.40    7.84 
   9   0  -1   96.28    8.08 
  -9   0   1   86.17    9.31 
   9   0  -1   69.89    7.79 
   9   0  -1   91.26    7.42 
  -9   0   1   72.07    8.07 
   9   0  -1   79.17    7.62 
   9   0  -1   82.09    9.88 
  -9   0   1   82.90    7.57 
   9   0  -1   95.08    8.15 
   9   0  -1   88.10    9.57 
  -9   0   1   88.72    8.38 
  -9   0   1   93.47    8.33 
   9   0  -1   83.59    7.91 
  -9   0   1   81.98    8.66 
  -9   0   1   93.48    9.20 
   9   0  -1   84.32    7.81 
  -8   0   1    0.10    2.24 
   8   0  -1    2.04    1.97 
  -8   0   1   -4.76    2.26 
   8   0  -1   -0.98    2.04 
   8   0  -1   -0.13    3.12 
   8   0  -1    1.86    1.93 
   8   0  -1   -0.19    1.84 
  -8   0   1    0.15    2.06 
  -8   0   1    0.61    2.17 
  -8   0   1   -1.84    1.92 
  -8   0   1   -0.49    2.29 
   8   0  -1    2.23    1.87 
  -8   0   1   -0.79    2.28 
  -8   0   1    2.35    2.18 
  -8   0   1    0.41    2.16 
  -8   0   1   -2.09    1.74 
   8   0  -1   -0.22    1.92 
   8   0  -1   -1.68    1.69 
   8   0  -1    0.66    2.01 
   8   0  -1    0.39    1.80 
  -8   0   1   -2.09    2.71 
   8   0  -1   -2.31    1.77 
  -7   0   1   52.22    5.63 
   7   0  -1   56.60    5.54 
  -7   0   1   47.46    6.22 
  -7   0   1   57.79    5.33 
   7   0  -1   52.74    5.46 
   7   0  -1   55.98    5.30 
   7   0  -1   57.83    4.74 
   7   0  -1   54.99    5.68 
   7   0  -1   52.01    5.60 
  -7   0   1   52.99    6.64 
  -7   0   1   49.22    6.15 
  -7   0   1   66.00    5.75 
   7   0  -1   60.08    4.75 
  -7   0   1   55.90    6.24 
   7   0  -1   55.23    6.30 
  -7   0   1   60.27    6.07 
  -7   0   1   53.88    4.48 
   7   0  -1   39.99    5.15 
  -7   0   1   52.22    5.73 
   7   0  -1   48.66    5.36 
  -7   0   1   56.48    5.78 
  -7   0   1   67.66    6.69 
   7   0  -1   56.65    5.67 
   7   0  -1   50.00    5.19 
   7   0  -1   56.57    5.09 
  -6   0   1   -0.97    1.34 
  -6   0   1   -0.10    1.41 
   6   0  -1   -0.74    1.02 
   6   0  -1   -0.97    1.13 
   6   0  -1    1.49    1.30 
   6   0  -1    0.86    1.52 
  -6   0   1    0.72    1.83 
  -6   0   1   -0.63    1.62 
  -6   0   1    0.94    1.73 
   6   0  -1    1.34    1.43 
   6   0  -1   -0.21    1.43 
  -6   0   1    0.36    0.89 
   6   0  -1    0.11    1.37 
   6   0  -1   -0.54    1.13 
   6   0  -1    0.24    1.30 
   6   0  -1    0.57    1.41 
  -6   0   1    3.20    1.52 
  -6   0   1    1.71    1.61 
   6   0  -1    0.17    1.39 
  -6   0   1   -0.61    1.63 
  -6   0   1    1.10    0.77 
  -6   0   1   -1.79    1.43 
   6   0  -1   -0.44    1.43 
   6   0  -1    0.33    1.61 
  -6   0   1   -0.82    1.54 
   5   0  -1  106.01    7.19 
   5   0  -1  109.60    7.95 
  -5   0   1   97.94    8.34 
  -5   0   1  104.66    7.25 
   5   0  -1  107.01    7.72 
  -5   0   1  114.17    8.09 
   5   0  -1  103.45    7.89 
  -5   0   1  106.27    7.11 
  -5   0   1  110.00    7.95 
   5   0  -1  103.93    7.91 
   5   0  -1  110.68    8.01 
   5   0  -1  108.34    8.16 
  -5   0   1  114.17    8.02 
   5   0  -1  102.04    7.90 
   5   0  -1  112.24    7.92 
   5   0  -1  113.93    7.81 
  -5   0   1  103.93    8.38 
  -5   0   1   96.51    8.02 
   5   0  -1  101.73    7.95 
   5   0  -1   95.04    7.78 
   5   0  -1  110.68    7.62 
   5   0  -1  116.62    7.37 
   5   0  -1  104.64    8.24 
   5   0  -1   87.82    8.16 
  -5   0   1  104.74    7.43 
  -5   0   1  109.58    8.23 
   4   0  -1   -0.30    1.08 
   4   0  -1    0.08    1.09 
   4   0  -1   -0.14    0.58 
   4   0  -1   -1.52    0.99 
   4   0  -1    0.00    0.97 
  -4   0   1    1.73    1.27 
   4   0  -1    1.14    0.99 
  -4   0   1    1.07    1.14 
   4   0  -1    0.05    0.93 
  -4   0   1   -0.05    1.32 
  -4   0   1    0.12    0.71 
   4   0  -1    0.14    0.94 
  -4   0   1    0.37    1.38 
  -4   0   1    0.07    0.80 
   4   0  -1    0.15    0.52 
  -4   0   1   -0.38    0.58 
   4   0  -1    0.58    1.18 
   4   0  -1   -0.33    0.87 
   4   0  -1   -0.35    1.18 
  -4   0   1    0.24    1.06 
   4   0  -1    0.83    1.23 
   4   0  -1   -0.09    1.03 
  -4   0   1    1.60    1.27 
   4   0  -1    1.42    1.13 
   4   0  -1    2.09    0.74 
   4   0  -1    1.03    1.12 
   4   0  -1   -2.05    1.03 
  -3   0   1  156.34   10.08 
   3   0  -1  156.35    9.79 
   3   0  -1  141.49   10.36 
   3   0  -1  135.64   10.05 
   3   0  -1  159.04   10.18 
  -3   0   1  146.94    9.84 
  -3   0   1  141.27   10.11 
   3   0  -1  152.68   10.20 
  -3   0   1  147.15   10.14 
   3   0  -1  155.59   10.66 
   3   0  -1  149.50   10.03 
   3   0  -1  153.97   10.11 
  -3   0   1  155.61   10.46 
   3   0  -1  163.84   10.28 
  -3   0   1  142.55   10.31 
  -3   0   1  134.42    9.71 
  -3   0   1  161.39   10.12 
   3   0  -1  142.58   10.12 
  -3   0   1  157.11   10.17 
   3   0  -1  143.27   10.16 
  -3   0   1  142.30   10.06 
  -3   0   1  148.24   10.29 
  -3   0   1  153.61   10.16 
   3   0  -1  131.03   10.30 
   3   0  -1  138.13   10.09 
   3   0  -1  144.66    9.82 
   3   0  -1  145.02   10.00 
   3   0  -1  145.63    9.71 
   3   0  -1  134.12   10.13 
   3   0  -1  141.53   10.24 
   3   0  -1  148.95   10.11 
   3   0  -1  146.12   10.34 
  -3   0   1  150.79   10.08 
   3   0  -1  153.04   10.18 
  -3   0   1  151.13    9.99 
  -3   0   1  154.68   10.13 
   3   0  -1  154.74   10.13 
  -3   0   1  150.96   10.26 
  -3   0   1  149.24   10.14 
   2   0  -1    0.48    0.60 
  -2   0   1    0.95    0.51 
  -2   0   1    0.24    0.45 
  -2   0   1    0.60    0.57 
  -2   0   1    0.66    0.63 
  -2   0   1    0.35    0.31 
   2   0  -1    1.22    0.51 
  -2   0   1    0.66    0.58 
   2   0  -1    0.15    0.35 
   2   0  -1    0.16    0.57 
  -2   0   1   -0.26    0.57 
   2   0  -1    0.54    0.64 
   2   0  -1    0.27    0.57 
  -2   0   1    0.14    0.63 
   2   0  -1    0.71    0.64 
  -2   0   1    0.17    0.86 
  -2   0   1    0.14    0.59 
   2   0  -1    0.83    0.61 
   2   0  -1   -0.13    0.57 
  -2   0   1    0.12    0.60 
   2   0  -1    0.83    0.54 
  -2   0   1    1.08    0.40 
   2   0  -1    0.78    0.29 
   2   0  -1    0.18    0.52 
   2   0  -1   -1.20    0.54 
   2   0  -1    0.25    0.45 
  -2   0   1   -0.06    0.59 
   2   0  -1    0.47    0.65 
  -2   0   1    0.69    0.53 
  -2   0   1    1.78    0.72 
  -2   0   1    0.11    0.59 
  -2   0   1    0.48    0.74 
   2   0  -1    0.29    0.53 
  -2   0   1    0.56    0.69 
   2   0  -1    1.08    0.59 
   2   0  -1    1.54    0.61 
  -2   0   1    1.29    0.67 
   2   0  -1    0.60    0.66 
   2   0  -1    0.74    0.53 
  -2   0   1    0.02    0.49 
   2   0  -1    2.62    0.79 
   2   0  -1   -0.69    0.48 
  -2   0   1    0.40    0.58 
   2   0  -1   -0.02    0.59 
  -2   0   1   -0.01    0.43 
   2   0  -1    0.10    0.54 
  -1   0   1   19.40    1.60 
  -1   0   1   23.93    1.54 
  -1   0   1   25.80    1.67 
  -1   0   1   23.36    1.65 
  -1   0   1   18.14    1.60 
  -1   0   1   22.02    1.66 
  -1   0   1   24.90    1.65 
  -1   0   1   22.28    1.73 
   1   0  -1   22.78    1.71 
  -1   0   1   22.09    1.64 
   1   0  -1   22.71    1.79 
   1   0  -1   21.86    1.74 
  -1   0   1   21.34    1.62 
  -1   0   1   21.99    1.65 
  -1   0   1   20.70    1.71 
  -1   0   1   20.22    1.57 
  -1   0   1   24.35    1.59 
  -1   0  -1  309.39   19.15 
  -1   0  -1  301.47   19.27 
  -1   0  -1  312.34   19.28 
   1   0   1  250.59   19.23 
  -1   0  -1  291.54   19.15 
  -1   0  -1  279.51   19.23 
  -1   0  -1  272.33   19.22 
   1   0   1  298.24   19.28 
  -1   0  -1  285.34   19.26 
   1   0   1  314.90   19.36 
   1   0   1  311.27   19.48 
   1   0   1  304.14   19.25 
  -1   0  -1  313.75   19.22 
  -1   0  -1  245.39   19.22 
   1   0   1  279.26   19.32 
  -1   0  -1  283.56   19.31 
   1   0   1  298.48   19.18 
   1   0   1  331.08   19.35 
  -1   0  -1  307.81   19.26 
  -1   0  -1  303.59   19.29 
   1   0   1  316.98   19.17 
   1   0   1  300.39   19.30 
   1   0   1  298.77   19.28 
   2   0   1   -0.26    0.54 
  -2   0  -1    0.14    0.63 
   2   0   1   -0.41    0.42 
   2   0   1   -0.27    0.50 
   2   0   1   -0.11    0.40 
   2   0   1    1.06    0.48 
  -2   0  -1   -0.06    0.55 
  -2   0  -1    0.64    0.61 
  -2   0  -1   -0.25    0.54 
   2   0   1    0.11    0.50 
  -2   0  -1   -0.38    0.32 
  -2   0  -1   -0.60    0.61 
   2   0   1   -0.22    0.62 
   2   0   1    1.46    0.63 
  -2   0  -1   -0.49    0.38 
  -2   0  -1   -0.05    0.50 
  -2   0  -1    1.81    0.82 
   2   0   1   -0.38    0.55 
   2   0   1   -0.02    0.60 
  -2   0  -1   -0.65    0.59 
  -2   0  -1    0.28    0.49 
   2   0   1   -0.40    0.65 
  -2   0  -1    0.15    0.52 
  -2   0  -1   -0.60    0.57 
   2   0   1    0.00    0.49 
   2   0   1    0.32    0.58 
  -2   0  -1   -0.69    0.64 
   2   0   1    1.60    1.21 
  -2   0  -1    0.40    0.53 
  -2   0  -1    2.44    1.11 
   2   0   1   -0.24    0.32 
   2   0   1    0.32    0.68 
  -2   0  -1    0.02    0.46 
   2   0   1    0.09    0.40 
   2   0   1    0.41    0.56 
   2   0   1    0.45    0.52 
  -2   0  -1    0.52    0.55 
  -2   0  -1   -0.57    0.43 
   2   0   1   -0.12    0.62 
   2   0   1   -0.38    0.59 
  -2   0  -1    0.65    0.81 
  -2   0  -1   -0.87    0.55 
   2   0   1   -0.15    0.38 
  -2   0  -1    0.20    0.51 
  -2   0  -1   -0.26    0.57 
  -2   0  -1   -0.36    0.46 
  -2   0  -1   -0.55    0.46 
   2   0   1    0.32    0.56 
   2   0   1    0.08    0.60 
   2   0   1   -0.54    0.48 
   3   0   1   79.00    5.85 
  -3   0  -1   80.10    5.70 
   3   0   1   83.94    5.96 
  -3   0  -1   80.86    5.69 
   3   0   1   70.77    5.84 
   3   0   1   81.78    5.94 
   3   0   1   83.15    5.93 
  -3   0  -1   77.70    5.89 
   3   0   1   79.86    5.71 
   3   0   1   85.60    5.54 
  -3   0  -1   83.72    5.84 
  -3   0  -1   86.45    5.68 
  -3   0  -1   79.65    5.81 
  -3   0  -1   77.83    5.96 
   3   0   1   83.93    6.13 
   3   0   1   81.59    5.65 
   3   0   1   82.56    5.90 
  -3   0  -1   77.32    5.87 
   3   0   1   80.52    5.75 
  -3   0  -1   79.76    5.84 
   3   0   1   77.55    5.80 
  -3   0  -1   76.55    5.80 
   3   0   1   78.61    5.89 
  -3   0  -1   75.52    5.81 
   3   0   1   78.10    5.93 
  -3   0  -1   80.51    5.74 
   3   0   1   80.68    6.09 
  -3   0  -1   83.58    5.92 
  -3   0  -1   78.56    5.39 
   3   0   1   78.31    5.59 
  -3   0  -1   81.44    6.08 
   3   0   1   80.50    6.53 
   3   0   1   83.96    5.77 
   3   0   1   81.09    5.88 
   3   0   1   77.91    5.50 
  -3   0  -1   80.60    6.17 
   3   0   1   86.63    5.96 
  -3   0  -1   84.72    5.99 
  -3   0  -1   76.87    5.92 
  -3   0  -1   81.67    5.64 
  -3   0  -1   81.05    5.79 
  -3   0  -1   81.41    6.10 
   4   0   1   -0.57    0.57 
   4   0   1    0.04    1.13 
  -4   0  -1   -1.11    1.30 
  -4   0  -1    0.72    0.82 
   4   0   1    1.27    1.02 
   4   0   1    0.62    1.03 
   4   0   1    0.82    1.15 
  -4   0  -1    0.61    1.10 
  -4   0  -1   -0.14    1.17 
  -4   0  -1    0.43    1.10 
  -4   0  -1    0.72    1.21 
   4   0   1    0.66    1.18 
   4   0   1   -1.08    0.88 
   4   0   1   -0.12    1.01 
   4   0   1    0.84    0.76 
   4   0   1   -1.51    1.06 
  -4   0  -1   -0.83    0.78 
   4   0   1   -0.62    0.93 
  -4   0  -1    0.01    1.29 
   4   0   1    0.76    0.82 
  -4   0  -1    0.39    1.18 
  -4   0  -1   -0.65    0.47 
   4   0   1    1.11    0.99 
   4   0   1    0.03    0.67 
  -4   0  -1   -0.40    1.09 
   4   0   1   -4.31    1.60 
   4   0   1    0.37    1.16 
  -5   0  -1   77.33    6.09 
  -5   0  -1   67.23    5.68 
  -5   0  -1   65.51    5.18 
   5   0   1   72.45    5.28 
   5   0   1   72.27    5.78 
   5   0   1   68.88    6.06 
   5   0   1   80.42    5.81 
  -5   0  -1   68.15    5.83 
   5   0   1   70.15    4.98 
  -5   0  -1   74.76    5.97 
  -5   0  -1   72.20    5.68 
   5   0   1   64.02    5.59 
   5   0   1   68.55    5.55 
   5   0   1   62.81    5.67 
   5   0   1   64.35    5.50 
   5   0   1   73.17    6.74 
  -5   0  -1   76.66    5.99 
   5   0   1   71.60    5.54 
  -5   0  -1   67.70    5.37 
   5   0   1   74.16    5.74 
   5   0   1   71.47    5.13 
   5   0   1   73.13    5.73 
   5   0   1   75.18    5.83 
  -5   0  -1   73.68    5.80 
   5   0   1   77.57    5.97 
  -5   0  -1   66.61    4.80 
  -5   0  -1   64.66    6.10 
  -5   0  -1   69.31    6.06 
  -6   0  -1    2.75    1.66 
   6   0   1    0.70    1.38 
   6   0   1    0.59    1.35 
   6   0   1   -0.44    1.42 
  -6   0  -1    1.18    1.73 
   6   0   1   -0.37    1.50 
  -6   0  -1    0.62    1.10 
  -6   0  -1   -2.57    1.34 
  -6   0  -1   -0.18    1.02 
   6   0   1   -0.27    1.45 
   6   0   1    2.72    2.63 
   6   0   1    1.35    1.44 
  -6   0  -1   -1.49    1.32 
   6   0   1    0.39    1.31 
  -6   0  -1    0.79    1.40 
  -6   0  -1    0.72    1.71 
  -6   0  -1   -2.22    1.34 
   6   0   1    0.49    1.25 
   6   0   1    2.27    1.32 
   6   0   1    0.07    1.38 
   6   0   1    0.39    0.75 
  -6   0  -1   -0.55    1.52 
   6   0   1   -1.45    1.53 
   6   0   1   -1.34    1.37 
   6   0   1    2.06    1.42 
  -6   0  -1   -3.17    1.74 
  -6   0  -1    1.18    1.91 
  -7   0  -1  315.44   21.50 
  -7   0  -1  305.17   21.44 
   7   0   1  305.05   20.92 
  -7   0  -1  306.23   21.90 
   7   0   1  292.96   21.10 
  -7   0  -1  293.31   20.36 
   7   0   1  294.18   21.18 
  -7   0  -1  307.25   21.22 
   7   0   1  306.69   21.26 
   7   0   1  324.62   21.21 
   7   0   1  312.69   21.13 
  -7   0  -1  310.90   21.21 
   7   0   1  317.95   20.82 
  -7   0  -1  304.86   21.64 
  -7   0  -1  303.35   20.62 
   7   0   1  301.89   21.17 
   7   0   1  297.28   20.97 
  -7   0  -1  313.45   21.41 
   7   0   1  307.91   20.97 
   7   0   1  293.35   21.44 
   7   0   1  281.63   21.68 
  -7   0  -1  308.69   21.61 
  -7   0  -1  286.29   21.88 
  -7   0  -1  316.93   21.04 
   7   0   1  296.90   21.21 
   8   0   1   -1.48    1.59 
   8   0   1    1.26    2.39 
  -8   0  -1    0.47    2.08 
   8   0   1   -2.88    1.56 
   8   0   1    0.37    1.70 
   8   0   1    0.37    2.18 
   8   0   1   -0.45    1.90 
  -8   0  -1   -0.56    2.04 
  -8   0  -1   -2.79    1.65 
  -8   0  -1    1.31    2.74 
  -8   0  -1    0.05    2.23 
  -8   0  -1    4.19    2.27 
  -8   0  -1   -2.49    2.21 
   8   0   1    2.38    1.87 
  -8   0  -1    1.16    2.36 
  -8   0  -1   -1.66    1.99 
   8   0   1   -0.95    1.82 
   8   0   1   -3.22    1.65 
  -8   0  -1   -0.45    1.36 
   8   0   1    2.45    2.17 
  -8   0  -1   -4.26    2.33 
   8   0   1   -1.44    1.66 
   8   0   1   -1.38    1.86 
   8   0   1    4.00    2.34 
  -8   0  -1    0.36    2.19 
  -9   0  -1  159.35   13.54 
   9   0   1  150.42   12.50 
  -9   0  -1  153.51   12.11 
   9   0   1  155.97   12.44 
   9   0   1  145.71   12.29 
  -9   0  -1  150.35   13.43 
   9   0   1  164.32   12.47 
  -9   0  -1  163.26   13.12 
   9   0   1  163.01   13.31 
   9   0   1  146.33   12.08 
   9   0   1  149.85   12.29 
  -9   0  -1  169.97   12.56 
   9   0   1  159.65   12.24 
  -9   0  -1  169.83   12.99 
  -9   0  -1  161.10   12.90 
   9   0   1  144.88   12.26 
  -9   0  -1  143.62   12.95 
  -9   0  -1  158.07   12.64 
   9   0   1  159.57   12.10 
  -9   0  -1  168.39   12.87 
  -9   0  -1  157.59   13.22 
 -10   0  -1    3.49    3.04 
  10   0   1    2.47    2.95 
  10   0   1    2.36    2.53 
  10   0   1    0.06    2.58 
  10   0   1    3.05    2.50 
  10   0   1   -3.13    3.41 
 -10   0  -1    0.12    2.90 
 -10   0  -1   -1.50    2.57 
  10   0   1    0.30    2.30 
 -10   0  -1    1.97    3.03 
 -10   0  -1   -3.77    2.59 
 -10   0  -1    0.23    2.59 
 -10   0  -1   -0.05    3.37 
  10   0   1   -1.70    2.47 
 -10   0  -1   -1.48    3.53 
 -10   0  -1   -2.28    2.60 
 -10   0  -1   -4.80    2.29 
  10   0   1   -2.62    2.26 
 -10   0  -1    2.43    3.35 
  10  -1  -1   -2.89    2.05 
 -10  -1   1   -0.45    3.07 
 -10  -1   1    0.55    2.92 
 -10  -1   1   -0.82    2.59 
  10  -1  -1    0.11    2.61 
  10  -1  -1    1.95    2.58 
 -10  -1   1    1.34    3.20 
 -10  -1   1    1.22    2.96 
 -10  -1   1   -0.56    2.55 
 -10  -1   1   -0.16    2.62 
  10  -1  -1   -3.12    2.10 
  10  -1  -1   -2.81    2.32 
  10  -1  -1   -3.02    2.47 
  10  -1  -1   -3.15    2.46 
  10  -1  -1   -5.84    3.05 
 -10  -1   1   -1.73    3.21 
 -10  -1   1   -3.04    2.63 
 -10  -1   1    1.34    3.09 
 -10   1   1   -0.34    3.10 
  10   1  -1    1.20    2.43 
 -10   1   1   -1.50    2.43 
 -10   1   1    3.26    3.91 
 -10   1   1    5.28    3.75 
 -10   1   1    5.64    3.55 
  10   1  -1    3.48    2.64 
 -10   1   1    0.03    3.49 
  10   1  -1   -4.10    1.76 
 -10   1   1   -1.08    2.79 
  10   1  -1   -1.49    3.79 
  10   1  -1   -1.80    2.58 
 -10   1   1   -2.60    2.84 
 -10   1   1   -0.10    2.59 
  10   1  -1    2.00    2.54 
 -10   1   1    2.72    2.87 
 -10   1   1   -3.77    2.55 
 -10   1   1   -4.20    2.49 
  10   1  -1   -2.83    1.88 
   9  -1  -1    1.82    2.41 
  -9  -1   1    1.74    2.98 
   9  -1  -1    7.95    2.62 
   9  -1  -1   -1.35    2.98 
  -9  -1   1    2.58    2.80 
   9  -1  -1    1.16    2.23 
   9  -1  -1   -0.44    1.95 
   9  -1  -1    4.00    2.41 
  -9  -1   1    1.48    2.25 
   9  -1  -1    3.86    2.84 
  -9  -1   1   -0.91    2.36 
  -9  -1   1   -0.09    2.85 
  -9  -1   1    2.29    2.45 
   9  -1  -1    7.60    2.52 
   9  -1  -1   -0.19    2.30 
  -9  -1   1    0.38    2.86 
  -9  -1   1   -0.31    2.70 
  -9  -1   1    1.40    2.54 
   9  -1  -1   -1.31    2.14 
  -9  -1   1   -1.91    2.41 
  -9   1   1    2.74    2.98 
  -9   1   1   -0.82    2.52 
  -9   1   1    7.00    3.01 
  -9   1   1   -3.39    2.91 
   9   1  -1    1.29    2.17 
  -9   1   1   -0.25    3.08 
  -9   1   1    0.18    3.03 
   9   1  -1   -0.63    2.11 
   9   1  -1   -0.63    1.95 
   9   1  -1    1.09    1.95 
  -9   1   1    1.06    2.56 
   9   1  -1    1.73    2.19 
  -9   1   1   -2.27    2.36 
  -9   1   1    2.25    2.53 
  -9   1   1    3.35    2.60 
   9   1  -1    6.83    4.10 
   9   1  -1    2.57    2.26 
  -9   1   1    2.66    2.91 
  -9   1   1    2.62    2.51 
   9   1  -1    4.09    2.81 
   9   1  -1   -1.25    2.16 
  -8  -1   1    3.38    2.58 
  -8  -1   1   16.57    3.36 
   8  -1  -1    7.62    3.16 
   8  -1  -1    7.16    2.73 
  -8  -1   1   12.48    2.82 
   8  -1  -1   10.05    2.10 
   8  -1  -1   13.88    2.91 
   8  -1  -1   11.67    2.68 
  -8  -1   1   10.63    3.07 
  -8  -1   1    9.85    3.34 
   8  -1  -1   11.31    2.83 
  -8  -1   1   15.40    3.16 
  -8  -1   1    7.71    3.23 
  -8  -1   1    6.49    2.07 
   8  -1  -1   10.11    2.45 
   8  -1  -1    9.20    2.65 
  -8  -1   1   12.16    3.00 
   8  -1  -1    6.00    2.46 
   8  -1  -1    6.27    2.39 
   8  -1  -1    8.26    2.25 
   8  -1  -1    7.13    2.58 
  -8  -1   1    6.64    2.93 
   8   1  -1   11.11    2.38 
  -8   1   1   15.05    3.24 
   8   1  -1    8.53    2.44 
  -8   1   1    6.89    3.34 
   8   1  -1    5.23    3.58 
  -8   1   1   11.36    3.25 
   8   1  -1   12.18    2.88 
   8   1  -1    7.07    2.85 
   8   1  -1   12.10    2.88 
  -8   1   1   13.86    3.80 
  -8   1   1    9.84    2.80 
  -8   1   1    9.63    3.25 
   8   1  -1    7.36    2.37 
  -8   1   1   12.41    3.30 
  -8   1   1    8.83    3.48 
  -8   1   1    7.35    2.64 
  -8   1   1    9.92    3.16 
  -8   1   1   13.55    3.48 
   8   1  -1    8.52    2.73 
   8   1  -1    6.90    2.41 
   8   1  -1    7.21    2.29 
   8   1  -1    7.67    2.86 
  -8   1   1    6.65    2.68 
   7  -1  -1    0.94    1.74 
   7  -1  -1    1.40    1.68 
  -7  -1   1   -0.58    1.64 
  -7  -1   1   -0.46    2.03 
   7  -1  -1    0.47    1.68 
  -7  -1   1    1.05    1.85 
   7  -1  -1    4.69    1.91 
  -7  -1   1    3.55    2.21 
   7  -1  -1   -0.15    1.69 
  -7  -1   1   -1.21    1.04 
   7  -1  -1    1.07    1.81 
  -7  -1   1    0.36    1.77 
  -7  -1   1    1.81    2.32 
  -7  -1   1    2.30    2.05 
   7  -1  -1    2.69    2.16 
   7  -1  -1   -0.05    1.50 
   7  -1  -1   -1.10    1.65 
   7  -1  -1    0.28    1.71 
  -7  -1   1    1.01    1.88 
   7  -1  -1    1.32    1.70 
   7  -1  -1   -1.03    1.56 
  -7  -1   1   -0.05    1.39 
   7   1  -1    1.04    1.86 
   7   1  -1    1.92    1.95 
  -7   1   1   -1.45    2.17 
  -7   1   1    0.49    1.82 
   7   1  -1    2.43    2.80 
   7   1  -1   -0.74    1.18 
   7   1  -1    1.91    1.43 
  -7   1   1    2.90    2.06 
   7   1  -1    0.32    1.99 
   7   1  -1    2.59    1.75 
  -7   1   1   -1.83    2.23 
   7   1  -1    4.13    1.75 
  -7   1   1   -0.80    1.77 
  -7   1   1   -2.41    1.72 
  -7   1   1    3.44    2.68 
   7   1  -1    1.24    1.61 
   7   1  -1    3.55    2.22 
   7   1  -1    1.93    1.83 
  -7   1   1   -1.75    1.84 
   7   1  -1    1.56    1.57 
  -7   1   1    1.57    2.09 
  -7   1   1    1.07    1.13 
  -7   1   1    1.91    1.06 
   7   1  -1    0.97    1.47 
  -7   1   1    0.45    2.09 
  -6  -1   1  168.59   12.71 
   6  -1  -1  141.91   11.86 
  -6  -1   1  168.96   12.20 
  -6  -1   1  177.68   12.14 
   6  -1  -1  161.52   13.03 
   6  -1  -1  183.34   12.12 
  -6  -1   1  166.13   12.27 
   6  -1  -1  157.53   12.56 
  -6  -1   1  165.79   11.53 
   6  -1  -1  156.30   12.18 
  -6  -1   1  155.11   11.64 
   6  -1  -1  165.86   12.08 
   6  -1  -1  170.02   11.99 
   6  -1  -1  160.53   12.12 
   6  -1  -1  153.80   12.35 
   6  -1  -1  172.55   11.92 
   6  -1  -1  159.76   12.02 
  -6  -1   1  164.78   11.87 
  -6  -1   1  160.12   12.24 
   6  -1  -1  158.31   11.34 
   6  -1  -1  166.68   12.13 
  -6  -1   1  157.90   12.34 
   6  -1  -1  173.02   12.11 
   6  -1  -1  176.61   12.19 
  -6  -1   1  168.44   12.56 
  -6   1   1  156.16   11.34 
  -6   1   1  176.15   12.32 
  -6   1   1  175.55   12.54 
  -6   1   1  196.95   12.33 
  -6   1   1  159.71   11.23 
   6   1  -1  168.76   11.48 
  -6   1   1  160.87   11.22 
   6   1  -1  149.84   12.47 
  -6   1   1  170.74   11.36 
  -6   1   1  184.46   12.27 
   6   1  -1  165.27   11.95 
   6   1  -1  185.07   12.34 
  -6   1   1  160.53   12.67 
  -6   1   1  163.08   12.90 
   6   1  -1  171.89   12.10 
   6   1  -1  168.68   11.84 
  -6   1   1  173.13   12.44 
   6   1  -1  163.44   12.02 
   6   1  -1  167.47   12.11 
   6   1  -1  176.01   12.08 
   6   1  -1  161.32   11.79 
   6   1  -1  176.82   11.76 
  -6   1   1  173.59   12.83 
   6   1  -1  174.96   12.21 
   5  -1  -1   74.13    5.81 
   5  -1  -1   69.47    5.76 
   5  -1  -1   70.53    6.26 
  -5  -1   1   73.81    6.07 
   5  -1  -1   67.85    5.63 
  -5  -1   1   74.35    5.57 
  -5  -1   1   76.75    5.88 
   5  -1  -1   71.72    5.83 
  -5  -1   1   75.02    6.04 
   5  -1  -1   69.82    5.26 
  -5  -1   1   76.98    5.35 
   5  -1  -1   70.77    5.73 
   5  -1  -1   63.67    5.72 
  -5  -1   1   73.80    6.03 
   5  -1  -1   73.90    5.77 
  -5  -1   1   73.48    5.71 
   5  -1  -1   72.17    5.94 
   5  -1  -1   84.37    6.01 
  -5  -1   1   68.66    6.19 
   5  -1  -1   78.63    6.83 
   5  -1  -1   68.59    5.84 
   5  -1  -1   78.71    5.37 
  -5  -1   1   73.66    6.13 
  -5  -1   1   73.86    5.45 
   5  -1  -1   67.39    6.09 
   5  -1  -1   75.17    5.91 
   5  -1  -1   77.07    6.05 
   5  -1  -1   70.85    5.36 
  -5  -1   1   72.08    6.30 
   5   1  -1   78.53    5.59 
   5   1  -1   81.38    5.96 
  -5   1   1   68.41    6.04 
  -5   1   1   68.14    5.25 
  -5   1   1   67.62    5.94 
  -5   1   1   71.66    6.42 
   5   1  -1   79.62    6.05 
   5   1  -1   71.19    6.25 
  -5   1   1   72.10    5.21 
   5   1  -1   71.07    5.66 
   5   1  -1   75.14    5.91 
   5   1  -1   75.18    5.98 
   5   1  -1   71.12    5.84 
  -5   1   1   70.00    5.24 
  -5   1   1   69.88    5.85 
  -5   1   1   67.06    6.26 
   5   1  -1   80.59    5.70 
  -5   1   1   79.30    6.72 
  -5   1   1   71.98    6.18 
   5   1  -1   73.76    5.83 
  -5   1   1   72.33    5.92 
   5   1  -1   71.58    5.37 
  -5   1   1   70.95    5.32 
   5   1  -1   79.51    5.98 
   5   1  -1   71.95    5.74 
  -4  -1   1  512.55   33.12 
  -4  -1   1  494.32   33.17 
   4  -1  -1  490.88   33.39 
   4  -1  -1  458.90   33.74 
   4  -1  -1  502.33   33.47 
   4  -1  -1  531.61   33.39 
  -4  -1   1  448.34   33.70 
   4  -1  -1  525.17   33.09 
  -4  -1   1  512.79   33.41 
   4  -1  -1  509.04   33.21 
   4  -1  -1  492.91   33.44 
  -4  -1   1  507.01   33.15 
   4  -1  -1  498.91   33.55 
   4  -1  -1  515.60   33.38 
   4  -1  -1  474.88   33.40 
  -4  -1   1  510.72   33.61 
  -4  -1   1  539.18   33.61 
   4  -1  -1  496.60   33.36 
  -4  -1   1  502.22   33.70 
  -4  -1   1  513.57   33.28 
   4  -1  -1  513.81   34.05 
   4  -1  -1  524.94   33.69 
   4  -1  -1  493.24   33.00 
   4  -1  -1  507.60   33.34 
   4  -1  -1  490.29   33.72 
   4  -1  -1  498.17   33.10 
  -4  -1   1  534.82   33.57 
  -4  -1   1  510.02   33.03 
   4  -1  -1  529.88   33.56 
   4  -1  -1  508.90   33.48 
  -4  -1   1  495.11   33.48 
   4  -1  -1  528.95   33.36 
  -4   1   1  530.49   33.90 
  -4   1   1  494.81   33.99 
  -4   1   1  515.07   33.49 
   4   1  -1  501.44   33.43 
   4   1  -1  509.80   33.07 
  -4   1   1  528.05   33.76 
   4   1  -1  510.78   33.83 
  -4   1   1  475.34   33.53 
   4   1  -1  511.39   33.17 
   4   1  -1  474.84   32.79 
   4   1  -1  519.38   33.46 
   4   1  -1  529.98   33.37 
  -4   1   1  494.78   33.52 
   4   1  -1  507.59   33.28 
   4   1  -1  510.90   33.45 
  -4   1   1  525.88   33.45 
   4   1  -1  511.74   33.43 
  -4   1   1  523.60   33.88 
   4   1  -1  512.18   33.29 
   4   1  -1  517.63   33.43 
   4   1  -1  516.26   33.43 
  -4   1   1  497.17   32.99 
   4   1  -1  505.35   33.51 
   4   1  -1  525.27   33.26 
  -4   1   1  483.83   32.99 
  -4   1   1  504.00   33.06 
  -3  -1   1   36.10    3.45 
   3  -1  -1   38.27    3.08 
  -3  -1   1   35.26    3.25 
  -3  -1   1   44.36    3.38 
   3  -1  -1   42.96    3.48 
  -3  -1   1   38.56    3.33 
   3  -1  -1   33.92    3.12 
  -3  -1   1   36.15    3.07 
   3  -1  -1   34.89    2.78 
  -3  -1   1   36.75    2.99 
   3  -1  -1   39.25    3.28 
   3  -1  -1   33.12    3.42 
  -3  -1   1   38.66    3.14 
  -3  -1   1   41.56    3.34 
   3  -1  -1   35.64    3.36 
   3  -1  -1   30.92    3.35 
   3  -1  -1   36.34    3.35 
   3  -1  -1   41.30    3.77 
   3  -1  -1   37.74    3.13 
   3  -1  -1   36.42    3.18 
   3  -1  -1   34.63    3.12 
  -3  -1   1   40.90    3.05 
  -3  -1   1   38.43    3.15 
  -3  -1   1   34.63    3.05 
  -3  -1   1   36.54    3.36 
   3  -1  -1   32.08    3.16 
   3  -1  -1   36.98    3.20 
  -3  -1   1   34.98    2.90 
   3  -1  -1   40.53    3.41 
  -3  -1   1   35.76    3.16 
   3  -1  -1   33.86    3.24 
  -3  -1   1   39.75    3.61 
  -3  -1   1   37.74    2.83 
   3  -1  -1   39.44    3.14 
   3  -1  -1   37.50    3.32 
  -3  -1   1   38.10    2.97 
   3  -1  -1   41.58    3.03 
  -3  -1   1   39.70    3.04 
  -3   1   1   37.83    2.89 
   3   1  -1   32.32    3.37 
  -3   1   1   31.83    3.55 
  -3   1   1   39.64    3.33 
   3   1  -1   37.75    3.20 
  -3   1   1   39.70    4.07 
  -3   1   1   36.27    2.76 
   3   1  -1   39.98    3.28 
  -3   1   1   36.28    3.04 
  -3   1   1   39.77    2.95 
   3   1  -1   45.19    3.27 
   3   1  -1   36.27    3.95 
  -3   1   1   35.87    3.19 
  -3   1   1   39.59    3.72 
   3   1  -1   38.96    3.20 
   3   1  -1   40.46    3.22 
   3   1  -1   35.26    3.04 
  -3   1   1   36.36    3.30 
  -3   1   1   40.01    3.45 
  -3   1   1   35.92    3.37 
   3   1  -1   40.33    2.96 
  -3   1   1   40.05    3.48 
   3   1  -1   41.29    2.88 
  -3   1   1   37.12    3.50 
   3   1  -1   42.69    3.21 
  -3   1   1   32.86    3.15 
  -3   1   1   36.68    3.06 
   3   1  -1   41.75    3.10 
  -3   1   1   33.96    3.25 
  -3   1   1   35.44    3.06 
  -3   1   1   37.39    3.19 
  -3   1   1   34.23    3.08 
   3   1  -1   38.62    3.07 
   3   1  -1   36.25    3.27 
  -3   1   1   30.33    3.01 
  -3   1   1   36.68    3.12 
   3   1  -1   36.85    3.05 
   2  -1  -1   99.30    7.24 
   2  -1  -1  106.82    7.32 
  -2  -1   1  105.28    7.27 
   2  -1  -1  103.79    7.00 
   2  -1  -1   97.09    7.01 
   2  -1  -1  104.79    7.21 
  -2  -1   1  105.93    7.05 
  -2  -1   1  103.67    6.92 
   2  -1  -1  109.05    7.15 
   2  -1  -1  104.83    7.19 
  -2  -1   1  102.34    7.04 
   2  -1  -1  119.75    7.40 
  -2  -1   1  102.88    7.11 
  -2  -1   1  102.73    7.15 
  -2  -1   1  107.24    7.33 
   2  -1  -1   98.85    7.21 
  -2  -1   1  102.81    6.87 
   2  -1  -1   98.14    7.12 
   2  -1  -1  108.23    7.17 
   2  -1  -1   96.92    7.17 
  -2  -1   1  101.20    6.75 
  -2  -1   1  103.88    7.27 
  -2  -1   1  106.45    6.87 
  -2  -1   1   98.78    6.89 
  -2  -1   1   97.38    7.05 
   2  -1  -1  106.60    7.09 
  -2  -1   1   97.76    7.21 
  -2  -1   1  107.55    6.89 
   2  -1  -1  111.84    7.00 
   2  -1  -1  111.66    7.07 
  -2  -1   1  104.53    7.10 
  -2  -1   1   99.60    6.94 
  -2  -1   1   99.53    7.22 
  -2  -1   1  110.44    6.94 
   2  -1  -1  100.52    6.86 
   2  -1  -1  114.10    7.32 
   2  -1  -1   97.41    7.31 
  -2  -1   1  105.06    7.14 
   2  -1  -1  106.11    7.05 
   2  -1  -1   95.74    7.29 
  -2  -1   1  101.59    6.95 
  -2  -1   1  106.42    7.10 
  -2  -1   1  103.53    7.04 
   2  -1  -1  104.66    7.14 
   2  -1  -1  103.03    7.20 
   2  -1  -1   99.38    7.07 
   2  -1  -1  106.09    7.42 
  -2   1   1  103.31    7.11 
  -2   1   1   94.79    7.32 
  -2   1   1  100.74    7.29 
  -2   1   1  104.73    7.13 
   2   1  -1  109.32    6.87 
  -2   1   1   96.77    7.28 
  -2   1   1  100.67    6.96 
   2   1  -1  106.44    6.97 
  -2   1   1   92.52    7.06 
   2   1  -1  102.10    7.10 
  -2   1   1  106.94    7.00 
  -2   1   1  100.86    6.85 
   2   1  -1  103.59    7.13 
  -2   1   1  109.65    7.24 
  -2   1   1  101.95    7.16 
  -2   1   1  101.27    7.05 
   2   1  -1  105.90    6.91 
  -2   1   1  112.53    7.22 
  -2   1   1   95.68    7.11 
  -2   1   1  113.72    6.98 
   2   1  -1  101.32    6.95 
   2   1  -1  111.51    7.10 
   2   1  -1  101.23    7.10 
  -2   1   1   93.48    7.21 
  -2   1   1  106.54    7.27 
  -2   1   1   94.70    7.08 
  -2   1   1  100.44    7.07 
  -2   1   1   99.78    7.43 
   2   1  -1  101.32    7.12 
   2   1  -1  106.86    7.01 
   2   1  -1  100.40    6.88 
  -2   1   1  101.50    7.32 
   2   1  -1  102.21    7.10 
   2   1  -1  102.73    7.02 
   2   1  -1  108.49    7.03 
  -2   1   1  105.23    7.10 
   2   1  -1  101.25    7.08 
  -2   1   1  104.10    7.08 
   2   1  -1  104.55    6.98 
  -2   1   1  101.82    7.00 
   2   1  -1   95.41    7.19 
  -2   1   1   93.46    7.23 
   1  -1  -1   18.72    1.87 
  -1  -1   1   19.74    1.67 
  -1  -1   1   20.73    1.62 
  -1  -1   1   20.52    1.40 
   1  -1  -1   13.90    1.75 
  -1  -1   1   21.20    1.69 
  -1  -1   1   21.68    1.64 
  -1  -1   1   20.10    1.40 
   1  -1  -1   18.86    1.71 
  -1  -1   1   19.12    1.72 
   1  -1  -1   18.76    1.77 
   1  -1  -1   17.80    1.65 
   1  -1  -1   17.52    1.66 
   1  -1  -1   21.71    1.79 
   1  -1  -1   17.62    1.61 
  -1  -1   1   19.27    1.43 
  -1  -1   1   17.96    1.76 
   1  -1  -1   17.64    1.93 
  -1  -1   1   19.54    1.54 
   1  -1  -1   19.41    1.66 
   1  -1  -1   19.93    1.93 
  -1  -1   1   17.92    1.66 
   1  -1  -1   19.97    1.80 
  -1  -1   1   19.87    1.72 
  -1  -1   1   21.11    1.63 
   1  -1  -1   18.83    1.75 
   1  -1  -1   18.03    1.84 
  -1  -1   1   20.70    1.54 
   1  -1  -1   17.44    1.67 
  -1  -1   1   18.09    1.80 
  -1  -1   1   21.34    1.48 
  -1  -1   1   21.08    1.76 
   1  -1  -1   18.76    1.57 
   1  -1  -1   17.62    1.66 
  -1  -1   1   19.73    1.48 
   1  -1  -1   21.40    1.86 
  -1  -1   1   21.48    1.52 
  -1  -1   1   20.01    1.63 
  -1   1   1   18.51    1.59 
  -1   1   1   21.31    1.90 
   1   1  -1   22.00    1.65 
  -1   1   1   21.03    1.73 
   1   1  -1   22.21    1.53 
   1   1  -1   17.36    1.73 
  -1   1   1   21.93    1.75 
  -1   1   1   16.17    1.78 
  -1   1   1   21.27    2.08 
   1   1  -1   18.78    1.47 
  -1   1   1   18.51    1.80 
  -1   1   1   22.78    2.07 
  -1   1   1   14.27    1.74 
   1   1  -1   16.55    1.68 
  -1   1   1   20.45    1.83 
   1   1  -1   21.04    1.83 
   1   1  -1   18.46    1.74 
  -1   1   1   14.69    1.79 
  -1   1   1   19.55    1.64 
  -1   1   1   15.27    1.70 
  -1   1   1   21.35    2.03 
  -1   1   1   19.70    1.68 
  -1   1   1   17.99    1.76 
  -1   1   1   22.07    1.88 
   1   1  -1   18.14    1.62 
  -1   1   1   16.25    1.63 
   1   1  -1   19.62    1.62 
  -1   1   1   18.01    1.86 
  -1   1   1   19.62    1.79 
   1   1  -1   19.86    1.53 
  -1   1   1   19.31    1.74 
  -1   1   1   16.03    1.62 
   1   1  -1   18.88    1.59 
   0  -1   1  487.87   32.77 
   0  -1  -1  434.82   33.07 
   0  -1  -1  463.51   32.72 
   0  -1   1  424.38   32.82 
   0  -1   1  520.54   32.46 
   0  -1   1  521.74   32.46 
   0  -1  -1  552.12   32.58 
   0  -1   1  529.01   32.42 
   0  -1   1  526.55   32.64 
   0  -1   1  531.21   32.41 
   0  -1   1  425.73   32.78 
   0  -1   1  569.80   32.85 
   0  -1   1  453.58   32.53 
   0  -1   1  507.71   32.44 
   0  -1  -1  484.23   32.46 
   0  -1  -1  500.81   32.66 
   0   1   1  446.56   32.63 
   0   1   1  517.12   32.59 
   0   1  -1  536.62   32.55 
   0   1   1  526.77   32.59 
   0   1  -1  516.90   32.62 
   0   1   1  499.87   32.58 
   0   1   1  528.37   32.63 
   0   1   1  511.61   32.61 
   0   1   1  495.17   32.53 
   0   1   1  516.94   32.60 
   1  -1   1   74.77    5.06 
   1  -1   1   75.82    5.18 
  -1  -1  -1   77.42    5.19 
  -1  -1  -1   73.62    5.09 
   1  -1   1   67.39    5.15 
   1  -1   1   76.22    5.03 
   1  -1   1   75.18    5.06 
  -1  -1  -1   80.05    5.07 
   1  -1   1   75.78    5.18 
  -1  -1  -1   72.29    5.13 
   1  -1   1   67.31    5.27 
  -1  -1  -1   73.77    5.11 
  -1  -1  -1   73.09    5.12 
   1  -1   1   72.27    5.04 
  -1  -1  -1   80.99    5.04 
  -1  -1  -1   65.82    4.95 
   1  -1   1   77.15    5.09 
  -1  -1  -1   73.27    5.31 
   1  -1   1   66.51    5.01 
   1  -1   1   71.13    5.17 
  -1  -1  -1   72.21    5.23 
  -1  -1  -1   73.30    5.11 
  -1  -1  -1   76.48    5.09 
   1  -1   1   74.20    5.08 
   1  -1   1   78.36    5.12 
  -1  -1  -1   68.87    4.99 
   1  -1   1   71.06    5.37 
   1  -1   1   75.76    5.06 
   1  -1   1   70.58    5.10 
  -1  -1  -1   75.33    5.07 
  -1  -1  -1   73.87    5.07 
   1  -1   1   72.14    5.12 
  -1  -1  -1   68.28    5.11 
  -1  -1  -1   75.88    5.05 
   1  -1   1   63.88    5.00 
  -1  -1  -1   76.30    5.12 
   1  -1   1   69.87    5.03 
  -1  -1  -1   68.30    4.94 
  -1  -1  -1   70.91    5.08 
  -1  -1  -1   76.27    5.08 
   1  -1   1   68.99    5.01 
   1  -1   1   68.09    5.01 
  -1  -1  -1   67.86    5.04 
   1  -1   1   74.63    5.15 
   1  -1   1   76.79    5.22 
  -1   1  -1   70.90    5.33 
   1   1   1   73.05    5.15 
  -1   1  -1   70.75    5.07 
  -1   1  -1   74.53    5.05 
  -1   1  -1   72.67    5.03 
   1   1   1   78.07    5.07 
  -1   1  -1   71.15    5.06 
  -1   1  -1   71.67    5.04 
  -1   1  -1   74.30    5.15 
  -1   1  -1   73.22    5.12 
   1   1   1   77.52    5.08 
   1   1   1   69.93    5.32 
  -1   1  -1   76.99    5.22 
   1   1   1   71.35    5.11 
  -1   1  -1   79.85    5.13 
  -1   1  -1   79.49    5.19 
  -1   1  -1   84.63    6.06 
   1   1   1   77.70    5.30 
   1   1   1   77.05    5.11 
  -1   1  -1   70.23    5.33 
   1   1   1   77.19    5.17 
   1   1   1   77.06    5.11 
   1   1   1   73.23    5.23 
  -1   1  -1   74.69    5.09 
  -1   1  -1   72.65    5.02 
   1   1   1   75.21    5.06 
   1   1   1   80.59    5.10 
   1   1   1   78.09    5.12 
   1   1   1   80.30    5.09 
  -1   1  -1   75.66    5.08 
   1   1   1   73.93    5.11 
   1   1   1   82.68    5.21 
  -1   1  -1   69.73    5.03 
   1   1   1   73.32    5.12 
   1   1   1   75.01    5.06 
   1   1   1   73.53    5.09 
  -1   1  -1   60.56    5.22 
  -1   1  -1   77.15    5.17 
  -1   1  -1   74.07    5.02 
   1   1   1   79.76    5.17 
   1   1   1   76.64    5.06 
   1   1   1   75.01    5.05 
  -2  -1  -1  908.58   59.02 
  -2  -1  -1  926.79   59.11 
   2  -1   1  934.05   59.17 
   2  -1   1  952.11   59.22 
  -2  -1  -1  926.90   59.11 
   2  -1   1  888.62   59.03 
   2  -1   1  854.43   59.17 
   2  -1   1  892.42   59.28 
  -2  -1  -1  867.83   59.06 
   2  -1   1  936.41   59.06 
   2  -1   1  845.09   59.25 
  -2  -1  -1  918.28   59.05 
   2  -1   1  894.33   59.12 
   2  -1   1  947.99   58.96 
   2  -1   1  925.10   58.93 
  -2  -1  -1  924.49   59.11 
  -2  -1  -1  908.29   59.17 
   2  -1   1  956.95   59.07 
  -2  -1  -1  938.94   58.98 
  -2  -1  -1  879.39   59.04 
  -2  -1  -1  937.59   59.28 
  -2  -1  -1  910.75   59.14 
  -2  -1  -1  910.46   58.93 
  -2  -1  -1  926.14   59.22 
   2  -1   1  928.23   59.14 
  -2  -1  -1  944.46   59.34 
  -2  -1  -1  876.98   58.98 
   2  -1   1  931.99   59.12 
  -2  -1  -1  889.37   59.14 
  -2  -1  -1  904.75   59.04 
  -2  -1  -1  841.15   59.23 
   2  -1   1  934.21   59.18 
  -2  -1  -1  920.72   59.14 
  -2  -1  -1  924.06   59.01 
  -2  -1  -1  862.37   59.13 
  -2  -1  -1  917.87   59.19 
   2  -1   1  905.88   59.12 
   2  -1   1  967.98   59.22 
   2  -1   1  899.88   59.17 
   2  -1   1  925.00   59.49 
   2  -1   1  929.73   59.03 
   2  -1   1  844.74   59.13 
   2  -1   1  823.81   59.28 
  -2  -1  -1  944.89   59.12 
   2  -1   1  916.68   59.08 
   2  -1   1  912.27   59.03 
  -2  -1  -1  931.38   59.49 
  -2  -1  -1  922.84   58.92 
  -2  -1  -1  910.03   59.06 
   2  -1   1  922.20   59.20 
   2   1   1  919.73   58.93 
  -2   1  -1  943.10   59.19 
  -2   1  -1  916.92   59.12 
   2   1   1  934.45   58.94 
  -2   1  -1  924.33   59.31 
  -2   1  -1  919.76   58.99 
  -2   1  -1  972.36   59.38 
  -2   1  -1  880.45   59.01 
  -2   1  -1  924.62   59.20 
  -2   1  -1  908.26   59.11 
   2   1   1  922.20   59.22 
  -2   1  -1  980.85   59.52 
   2   1   1  952.87   59.10 
   2   1   1  949.16   59.16 
  -2   1  -1  913.06   59.05 
   2   1   1  907.27   59.25 
  -2   1  -1  945.55   59.23 
   2   1   1  927.14   59.50 
  -2   1  -1  904.77   58.99 
  -2   1  -1  856.44   59.14 
   2   1   1  945.78   59.11 
   2   1   1  935.14   59.08 
   2   1   1  889.17   59.13 
  -2   1  -1  880.01   59.08 
   2   1   1  906.19   59.12 
   2   1   1  942.52   59.07 
   2   1   1  937.26   59.06 
  -2   1  -1  906.20   59.03 
  -2   1  -1  858.61   59.03 
   2   1   1  891.11   59.15 
  -2   1  -1  920.37   59.09 
  -2   1  -1  950.61   59.21 
   2   1   1  899.32   59.15 
  -2   1  -1  855.39   59.25 
   2   1   1  933.78   59.20 
   2   1   1  873.35   58.98 
   2   1   1  889.15   59.33 
   2   1   1  920.72   59.17 
  -2   1  -1  938.63   59.12 
  -2   1  -1  925.12   59.39 
   2   1   1  922.50   59.03 
   2   1   1  941.97   59.08 
  -2   1  -1  848.15   59.01 
   2   1   1  971.19   59.04 
  -2   1  -1  871.61   59.09 
   2   1   1  899.85   58.98 
  -2   1  -1  865.33   59.10 
  -2   1  -1  814.44   59.17 
  -3  -1  -1    8.35    1.25 
  -3  -1  -1    8.85    1.23 
  -3  -1  -1    8.57    1.69 
   3  -1   1    9.25    1.56 
   3  -1   1    8.89    1.28 
   3  -1   1    8.30    1.61 
  -3  -1  -1    9.63    1.56 
  -3  -1  -1    8.19    1.50 
  -3  -1  -1    9.42    1.39 
   3  -1   1    9.83    1.52 
   3  -1   1    8.36    1.50 
  -3  -1  -1   10.69    1.82 
   3  -1   1    8.73    1.39 
  -3  -1  -1    6.61    1.28 
  -3  -1  -1    9.18    1.38 
  -3  -1  -1    7.00    1.64 
   3  -1   1    9.38    1.26 
   3  -1   1    8.65    1.48 
   3  -1   1    8.61    1.25 
  -3  -1  -1    7.54    1.50 
  -3  -1  -1    8.44    1.44 
   3  -1   1    9.28    1.34 
  -3  -1  -1    7.03    1.28 
   3  -1   1    7.66    1.44 
   3  -1   1    6.95    1.32 
   3  -1   1   11.42    1.40 
   3  -1   1    8.16    1.61 
   3  -1   1    7.01    1.39 
  -3  -1  -1    7.98    1.26 
   3  -1   1    9.08    1.68 
   3  -1   1    8.12    2.32 
  -3  -1  -1    9.68    1.73 
   3  -1   1    9.79    1.56 
   3  -1   1    8.64    1.48 
  -3  -1  -1   11.53    1.50 
  -3   1  -1    8.82    1.86 
   3   1   1    7.33    2.15 
  -3   1  -1    9.45    1.56 
  -3   1  -1   10.58    1.30 
  -3   1  -1    6.33    1.51 
  -3   1  -1    7.22    1.27 
   3   1   1   10.35    1.65 
  -3   1  -1   11.65    1.72 
   3   1   1    8.89    1.16 
  -3   1  -1   10.15    1.44 
  -3   1  -1    9.01    1.72 
  -3   1  -1    9.24    1.45 
   3   1   1   10.84    1.83 
  -3   1  -1    8.44    1.16 
  -3   1  -1   10.39    1.91 
   3   1   1   12.05    1.61 
   3   1   1    7.43    1.30 
   3   1   1    5.70    1.39 
  -3   1  -1   10.67    1.67 
   3   1   1   10.02    1.55 
  -3   1  -1    9.41    1.54 
   3   1   1    8.56    1.50 
   3   1   1    8.84    1.44 
   3   1   1    7.50    1.36 
   3   1   1   11.21    1.48 
   3   1   1    9.99    1.30 
   3   1   1    8.48    1.33 
   3   1   1    9.71    1.50 
  -3   1  -1    6.50    1.19 
  -3   1  -1    8.98    1.39 
  -3   1  -1    7.99    1.45 
   3   1   1   10.23    1.68 
  -3   1  -1    9.64    1.70 
  -3   1  -1    7.88    1.22 
   4  -1   1  214.10   13.82 
   4  -1   1  201.12   13.78 
  -4  -1  -1  194.77   13.95 
  -4  -1  -1  187.94   13.56 
   4  -1   1  202.05   13.94 
  -4  -1  -1  196.92   13.90 
   4  -1   1  208.88   13.65 
  -4  -1  -1  198.53   13.74 
   4  -1   1  201.93   13.66 
   4  -1   1  197.67   13.84 
   4  -1   1  197.72   13.80 
  -4  -1  -1  187.94   14.04 
  -4  -1  -1  211.55   13.43 
   4  -1   1  208.32   13.70 
   4  -1   1  188.82   13.47 
  -4  -1  -1  199.49   13.89 
   4  -1   1  199.87   14.56 
   4  -1   1  201.84   13.79 
   4  -1   1  200.12   13.73 
   4  -1   1  203.84   13.48 
  -4  -1  -1  205.61   13.87 
  -4  -1  -1  201.87   13.50 
   4  -1   1  206.42   13.88 
   4  -1   1  209.12   13.57 
   4  -1   1  189.86   13.38 
  -4  -1  -1  197.35   13.61 
   4  -1   1  201.55   13.81 
   4  -1   1  209.57   14.14 
   4  -1   1  190.59   13.60 
  -4  -1  -1  214.28   14.05 
   4   1   1  204.60   13.75 
   4   1   1  214.49   13.46 
  -4   1  -1  205.21   14.03 
  -4   1  -1  210.39   14.31 
  -4   1  -1  184.07   13.47 
   4   1   1  185.49   13.15 
   4   1   1  204.15   13.69 
   4   1   1  191.51   13.31 
  -4   1  -1  202.04   13.75 
  -4   1  -1  178.52   14.13 
  -4   1  -1  198.52   13.87 
   4   1   1  211.63   13.79 
  -4   1  -1  198.42   14.13 
  -4   1  -1  188.77   13.38 
   4   1   1  191.08   14.07 
  -4   1  -1  207.88   13.88 
  -4   1  -1  195.16   13.48 
  -4   1  -1  198.23   13.92 
  -4   1  -1  207.02   13.87 
   4   1   1  190.92   13.61 
   4   1   1  201.30   14.54 
   4   1   1  198.86   13.78 
   4   1   1  196.63   13.60 
   4   1   1  198.75   13.82 
   4   1   1  205.87   13.57 
  -4   1  -1  199.67   13.31 
   4   1   1  206.99   13.79 
   4   1   1  202.97   13.77 
   5  -1   1    0.78    0.86 
  -5  -1  -1    3.04    1.43 
  -5  -1  -1    2.14    1.55 
  -5  -1  -1    0.04    1.32 
  -5  -1  -1    2.73    1.35 
   5  -1   1    1.40    1.40 
   5  -1   1    1.43    1.33 
   5  -1   1    1.10    1.41 
   5  -1   1    1.31    1.26 
   5  -1   1    1.04    1.27 
   5  -1   1    0.18    1.14 
   5  -1   1    1.21    1.53 
   5  -1   1    3.08    1.32 
   5  -1   1    3.12    1.31 
  -5  -1  -1    1.97    0.98 
  -5  -1  -1    5.06    1.79 
   5  -1   1    1.17    1.35 
  -5  -1  -1    2.87    1.04 
   5  -1   1    1.36    1.35 
  -5  -1  -1    1.30    1.33 
   5  -1   1    1.27    0.84 
  -5  -1  -1    1.17    1.55 
  -5  -1  -1    1.98    1.10 
  -5  -1  -1    1.86    1.47 
   5  -1   1    2.20    1.30 
   5  -1   1    2.46    1.36 
   5  -1   1    1.33    2.06 
   5  -1   1    0.44    1.17 
   5   1   1    3.97    1.45 
   5   1   1    2.48    1.40 
   5   1   1    3.27    1.21 
   5   1   1    1.07    0.57 
   5   1   1    4.22    1.57 
   5   1   1    3.02    1.49 
  -5   1  -1    1.91    1.40 
  -5   1  -1    1.49    1.64 
  -5   1  -1    2.16    1.37 
   5   1   1    2.23    1.38 
   5   1   1    2.88    1.23 
  -5   1  -1    2.49    0.91 
   5   1   1    2.28    1.41 
  -5   1  -1    2.00    1.58 
   5   1   1   -0.50    1.08 
   5   1   1    3.75    1.30 
  -5   1  -1    1.98    1.50 
   5   1   1    1.92    0.97 
  -5   1  -1    1.73    1.46 
  -5   1  -1    3.30    0.87 
   5   1   1    2.95    0.83 
  -5   1  -1    2.72    1.74 
  -5   1  -1    1.61    1.03 
  -5   1  -1    3.12    1.61 
   5   1   1    2.06    1.29 
  -5   1  -1    1.45    1.06 
  -5   1  -1    0.69    1.61 
   6  -1   1    7.20    2.12 
   6  -1   1   10.42    2.68 
   6  -1   1   10.28    1.53 
   6  -1   1    8.86    2.06 
  -6  -1  -1    7.91    2.03 
   6  -1   1   12.09    2.47 
   6  -1   1   10.31    1.52 
  -6  -1  -1    9.03    2.42 
  -6  -1  -1   13.11    2.46 
   6  -1   1   10.41    2.02 
  -6  -1  -1   11.63    2.35 
   6  -1   1   12.26    2.69 
  -6  -1  -1    8.07    1.87 
   6  -1   1    8.32    2.15 
   6  -1   1    7.11    2.13 
  -6  -1  -1    9.30    2.51 
   6  -1   1    4.50    2.90 
  -6  -1  -1    7.93    2.56 
   6  -1   1    8.22    2.12 
   6  -1   1    8.16    2.11 
  -6  -1  -1   11.76    2.44 
  -6  -1  -1    7.10    1.80 
   6  -1   1    9.99    2.24 
   6  -1   1    9.10    2.14 
  -6  -1  -1   13.29    2.65 
   6  -1   1    6.37    1.96 
  -6   1  -1    8.15    2.45 
  -6   1  -1    8.04    2.69 
  -6   1  -1   10.29    2.86 
   6   1   1    5.04    2.06 
   6   1   1   10.18    2.44 
  -6   1  -1    5.11    2.03 
   6   1   1   14.12    2.40 
   6   1   1    7.84    2.37 
  -6   1  -1    8.65    1.66 
   6   1   1    8.94    1.92 
  -6   1  -1   12.27    2.83 
   6   1   1    8.87    2.37 
   6   1   1    8.39    1.80 
   6   1   1   12.72    2.41 
   6   1   1   10.51    2.13 
  -6   1  -1    7.93    1.60 
  -6   1  -1    6.39    1.21 
   6   1   1    8.54    2.01 
  -6   1  -1    7.02    2.14 
  -6   1  -1    9.09    2.17 
   6   1   1    9.50    2.15 
  -6   1  -1   11.61    2.44 
  -6   1  -1    8.17    2.44 
   6   1   1    9.05    2.07 
  -7  -1  -1   13.24    2.77 
   7  -1   1   14.67    3.96 
  -7  -1  -1   14.81    2.30 
   7  -1   1    4.37    2.50 
   7  -1   1   10.37    2.69 
  -7  -1  -1   11.29    2.83 
   7  -1   1   12.30    2.60 
   7  -1   1   13.26    2.58 
   7  -1   1   14.58    2.72 
   7  -1   1   11.60    2.76 
  -7  -1  -1    7.88    3.11 
   7  -1   1   14.70    2.62 
  -7  -1  -1   14.46    3.30 
  -7  -1  -1   14.16    2.34 
   7  -1   1   11.06    2.66 
   7  -1   1   11.82    1.89 
   7  -1   1   14.13    2.77 
  -7  -1  -1   14.76    2.76 
  -7  -1  -1   11.83    3.05 
   7  -1   1    8.08    2.87 
  -7  -1  -1   13.52    2.82 
  -7  -1  -1   11.81    3.21 
   7  -1   1   11.18    2.61 
   7  -1   1   12.06    2.74 
   7   1   1   17.90    2.80 
  -7   1  -1   12.80    3.11 
  -7   1  -1   14.12    3.43 
  -7   1  -1   14.73    3.07 
  -7   1  -1    8.40    2.56 
   7   1   1   12.69    2.27 
  -7   1  -1   17.19    3.17 
  -7   1  -1   11.03    2.73 
  -7   1  -1   12.49    2.91 
   7   1   1    8.84    2.51 
   7   1   1   14.39    3.21 
   7   1   1    9.79    2.72 
  -7   1  -1    8.31    1.89 
  -7   1  -1   15.44    3.33 
  -7   1  -1   10.84    3.40 
   7   1   1   14.13    2.59 
  -7   1  -1   12.91    3.37 
   7   1   1    7.13    2.37 
   7   1   1   15.69    3.01 
   7   1   1   18.75    2.97 
   7   1   1   12.36    2.65 
  -7   1  -1   14.58    2.94 
   7   1   1   12.57    3.06 
  -7   1  -1   12.77    2.13 
   7   1   1   11.25    2.38 
  -8  -1  -1    4.26    2.80 
   8  -1   1   10.02    3.16 
  -8  -1  -1    4.38    2.00 
   8  -1   1    5.83    2.26 
   8  -1   1    6.44    2.53 
   8  -1   1    4.76    2.22 
   8  -1   1    7.14    2.52 
  -8  -1  -1    9.93    3.04 
  -8  -1  -1   11.86    3.14 
  -8  -1  -1    8.59    3.27 
   8  -1   1    6.73    2.39 
   8  -1   1    9.02    2.62 
   8  -1   1    5.86    2.33 
  -8  -1  -1    2.36    2.28 
   8  -1   1    4.35    2.08 
  -8  -1  -1    5.66    1.81 
   8  -1   1    5.97    2.44 
   8  -1   1    4.78    2.32 
  -8  -1  -1    6.08    2.64 
   8  -1   1    6.19    2.44 
  -8  -1  -1   10.22    2.93 
   8  -1   1    4.72    2.47 
  -8  -1  -1    3.30    2.19 
   8  -1   1    8.20    3.76 
  -8  -1  -1   10.28    3.32 
   8   1   1    7.14    2.58 
  -8   1  -1    2.91    2.41 
   8   1   1    5.65    2.56 
   8   1   1    6.93    2.71 
  -8   1  -1    4.24    2.51 
   8   1   1    5.62    2.22 
  -8   1  -1    4.33    2.92 
  -8   1  -1    5.55    2.67 
   8   1   1    3.37    2.60 
   8   1   1    5.87    2.37 
  -8   1  -1    0.36    2.87 
   8   1   1    6.46    2.26 
   8   1   1    6.64    2.09 
   8   1   1    7.65    2.54 
  -8   1  -1    2.71    2.67 
  -8   1  -1    1.71    2.40 
  -8   1  -1    7.66    2.64 
  -8   1  -1   10.15    2.85 
   8   1   1    7.21    2.53 
   8   1   1    6.15    2.40 
  -8   1  -1    4.19    3.02 
  -8   1  -1    3.45    3.03 
  -8   1  -1    5.01    2.78 
  -9  -1  -1   -2.56    2.31 
   9  -1   1   -0.71    1.93 
  -9  -1  -1    1.40    2.37 
   9  -1   1    0.38    2.07 
  -9  -1  -1   -0.12    2.33 
  -9  -1  -1    3.50    3.15 
   9  -1   1   -0.65    2.17 
   9  -1   1   -2.88    1.96 
  -9  -1  -1    1.51    2.53 
  -9  -1  -1   -1.83    2.45 
  -9  -1  -1    1.09    2.58 
   9  -1   1    1.81    2.09 
   9  -1   1   -0.89    2.07 
   9  -1   1   -1.68    2.42 
  -9  -1  -1   -1.35    2.35 
   9  -1   1    1.46    2.38 
   9  -1   1    2.76    2.55 
  -9  -1  -1    0.17    2.43 
  -9   1  -1    2.03    3.10 
   9   1   1    1.12    2.20 
   9   1   1   -0.10    2.07 
  -9   1  -1    0.22    2.14 
   9   1   1   -1.29    1.83 
  -9   1  -1   -0.87    2.37 
  -9   1  -1    0.23    2.50 
  -9   1  -1    6.47    2.98 
  -9   1  -1    3.47    3.39 
   9   1   1   -1.53    2.28 
   9   1   1    0.79    1.96 
  -9   1  -1    0.42    2.61 
  -9   1  -1    1.04    2.98 
  -9   1  -1    4.97    2.91 
  -9   1  -1    2.04    2.50 
   9   1   1   -0.95    2.10 
  -9   1  -1    2.64    2.50 
  -9   1  -1   -0.84    2.26 
   9   1   1    0.89    2.03 
   9   1   1    3.10    2.28 
   9   1   1    5.29    2.74 
  10  -1   1    0.04    2.68 
 -10  -1  -1    1.49    3.45 
  10  -1   1   -0.34    2.50 
 -10  -1  -1   -4.23    2.58 
  10  -1   1    2.53    2.73 
 -10  -1  -1   -4.07    2.48 
  10  -1   1    0.85    3.92 
 -10  -1  -1    0.82    2.77 
 -10  -1  -1    4.65    3.04 
 -10  -1  -1   -1.02    2.96 
 -10  -1  -1   -2.40    2.96 
 -10  -1  -1    1.88    3.13 
  10  -1   1   -0.08    2.53 
 -10  -1  -1   -3.86    2.97 
  10  -1   1   -2.72    2.58 
 -10  -1  -1    2.48    3.11 
 -10  -1  -1    0.56    2.79 
  10  -1   1    0.51    2.40 
  10   1   1    0.32    2.41 
  10   1   1   -2.49    2.30 
 -10   1  -1   -1.34    2.75 
 -10   1  -1   -4.24    2.40 
 -10   1  -1   -3.67    2.99 
  10   1   1    3.96    2.78 
 -10   1  -1    4.17    3.40 
 -10   1  -1   -0.98    2.58 
 -10   1  -1    1.63    3.43 
 -10   1  -1    2.86    3.16 
 -10   1  -1   -3.36    2.82 
 -10   1  -1    2.52    3.08 
  10   1   1   -5.42    2.13 
  10   1   1    0.57    2.31 
 -10   1  -1   -0.51    2.61 
  10   1   1    2.00    2.93 
  10   1   1   -1.05    2.27 
 -10   1  -1   -0.21    3.21 
 -10   1  -1    1.15    3.02 
  10   1   1   -2.06    3.75 
 -10  -2   1   54.26    7.49 
  10  -2  -1   48.33    7.44 
  10  -2  -1   42.15    5.94 
 -10  -2   1   43.20    6.66 
  10  -2  -1   48.02    6.07 
 -10  -2   1   51.92    6.69 
 -10  -2   1   51.26    6.41 
 -10  -2   1   49.00    7.03 
 -10  -2   1   49.50    6.72 
 -10  -2   1   49.20    6.34 
  10  -2  -1   40.39    7.55 
 -10  -2   1   59.60    7.65 
  10  -2  -1   35.14    5.83 
  10  -2  -1   39.45    5.91 
 -10  -2   1   62.18    7.17 
  10  -2  -1   49.58    6.16 
  10   2  -1   47.23    6.25 
 -10   2   1   54.77    7.76 
  10   2  -1   43.86    6.00 
 -10   2   1   32.06    6.21 
 -10   2   1   60.82    7.32 
  10   2  -1   39.15    6.25 
 -10   2   1   47.24    8.14 
 -10   2   1   46.01    6.45 
 -10   2   1   59.64    6.82 
 -10   2   1   48.85    6.58 
 -10   2   1   55.90    6.82 
  10   2  -1   39.45    7.34 
 -10   2   1   53.29    7.30 
  10   2  -1   28.76    5.05 
 -10   2   1   52.80    7.51 
 -10   2   1   53.19    6.92 
 -10   2   1   45.97    7.62 
  10   2  -1   46.84    6.27 
  10   2  -1   49.58    6.20 
 -10   2   1   43.19    6.53 
   9  -2  -1   38.82    5.96 
   9  -2  -1   52.21    5.96 
  -9  -2   1   53.78    5.99 
   9  -2  -1   54.19    6.26 
  -9  -2   1   57.83    6.86 
  -9  -2   1   45.70    6.54 
   9  -2  -1   55.03    7.28 
   9  -2  -1   48.96    5.59 
  -9  -2   1   49.13    6.09 
  -9  -2   1   57.97    6.53 
   9  -2  -1   46.74    5.54 
  -9  -2   1   53.06    6.50 
  -9  -2   1   44.64    5.86 
   9  -2  -1   45.97    5.82 
   9  -2  -1   36.85    6.80 
   9  -2  -1   44.67    5.76 
  -9  -2   1   49.88    6.94 
  -9  -2   1   41.61    6.44 
   9  -2  -1   52.22    6.53 
  -9  -2   1   48.90    6.24 
  -9   2   1   53.01    6.46 
  -9   2   1   49.11    6.25 
  -9   2   1   56.11    6.61 
  -9   2   1   54.12    6.66 
   9   2  -1   56.35    6.54 
  -9   2   1   45.06    6.05 
  -9   2   1   43.29    6.85 
  -9   2   1   51.36    7.03 
   9   2  -1   51.21    6.13 
  -9   2   1   49.32    7.32 
  -9   2   1   43.18    6.56 
   9   2  -1   38.59    6.98 
   9   2  -1   52.57    5.98 
  -9   2   1   61.89    6.61 
   9   2  -1   49.71    6.31 
   9   2  -1   65.32    6.47 
  -9   2   1   45.88    6.64 
   9   2  -1   42.79    5.46 
   8  -2  -1    4.92    2.35 
   8  -2  -1   13.75    3.27 
  -8  -2   1    7.51    2.82 
  -8  -2   1    6.36    2.42 
   8  -2  -1    6.86    2.49 
  -8  -2   1    8.21    3.12 
   8  -2  -1   11.71    2.77 
   8  -2  -1    8.65    2.60 
  -8  -2   1   17.75    3.66 
  -8  -2   1    9.37    3.00 
  -8  -2   1   12.88    3.46 
   8  -2  -1    8.74    2.91 
   8  -2  -1    8.05    3.21 
  -8  -2   1   14.56    3.11 
   8  -2  -1   11.69    2.97 
   8  -2  -1    6.67    2.61 
  -8  -2   1    7.53    3.00 
   8  -2  -1    9.96    2.80 
  -8  -2   1   12.16    2.59 
   8   2  -1    6.29    2.59 
  -8   2   1   13.17    3.21 
  -8   2   1    7.11    3.46 
  -8   2   1    5.48    3.15 
   8   2  -1   18.49    3.06 
   8   2  -1    8.86    3.03 
  -8   2   1   11.00    3.04 
  -8   2   1    9.39    3.19 
  -8   2   1    9.20    3.74 
   8   2  -1    6.46    2.76 
   8   2  -1   13.54    2.40 
  -8   2   1   12.00    3.57 
  -8   2   1   11.46    3.26 
   8   2  -1   16.67    3.05 
   8   2  -1    7.54    2.45 
   8   2  -1    9.16    2.89 
  -8   2   1    8.28    2.99 
  -8   2   1    9.35    3.03 
   8   2  -1    4.45    3.32 
   8   2  -1    9.45    2.33 
  -7  -2   1    3.75    2.56 
   7  -2  -1    5.16    2.37 
   7  -2  -1    4.90    2.02 
   7  -2  -1    5.34    1.73 
  -7  -2   1    5.04    2.31 
   7  -2  -1    4.02    2.03 
  -7  -2   1    6.77    2.63 
   7  -2  -1    4.74    2.32 
  -7  -2   1    5.97    2.29 
   7  -2  -1    7.47    2.28 
   7  -2  -1    6.68    2.23 
  -7  -2   1    5.25    1.85 
  -7  -2   1    6.18    1.66 
   7  -2  -1    8.19    2.50 
  -7  -2   1    7.47    1.79 
   7  -2  -1    1.73    1.79 
  -7  -2   1    5.13    2.34 
   7  -2  -1    9.65    3.46 
  -7  -2   1    4.46    2.14 
  -7  -2   1    6.37    2.60 
   7  -2  -1    9.65    2.56 
   7  -2  -1    5.31    2.23 
   7   2  -1    3.41    2.17 
   7   2  -1    4.02    1.63 
  -7   2   1    6.57    2.51 
  -7   2   1    4.71    2.27 
  -7   2   1    8.28    2.73 
  -7   2   1    8.01    2.57 
  -7   2   1    6.61    2.72 
   7   2  -1    2.24    1.93 
   7   2  -1    4.06    2.28 
  -7   2   1    8.19    2.94 
   7   2  -1    6.05    1.89 
   7   2  -1    5.34    1.74 
  -7   2   1    4.27    2.20 
  -7   2   1    7.09    3.20 
   7   2  -1    5.03    2.09 
   7   2  -1   11.00    3.50 
   7   2  -1    5.11    2.15 
   7   2  -1    6.48    2.08 
  -7   2   1    6.64    2.95 
  -7   2   1   10.58    3.08 
   7   2  -1    4.18    1.92 
  -7   2   1    4.59    1.55 
   6  -2  -1    8.76    2.21 
  -6  -2   1    8.64    2.58 
   6  -2  -1   11.28    2.06 
   6  -2  -1    9.48    2.11 
   6  -2  -1    7.74    2.05 
  -6  -2   1   13.21    2.64 
   6  -2  -1    7.73    2.12 
   6  -2  -1    9.47    2.37 
   6  -2  -1   12.35    2.75 
   6  -2  -1    7.53    2.20 
  -6  -2   1    8.23    2.32 
  -6  -2   1    9.09    1.56 
   6  -2  -1    8.58    2.19 
   6  -2  -1   10.18    2.45 
   6  -2  -1    8.36    3.11 
   6  -2  -1   12.83    2.40 
   6  -2  -1    9.47    2.49 
  -6  -2   1   12.65    2.04 
  -6  -2   1   15.33    2.07 
  -6  -2   1   10.60    2.41 
  -6  -2   1    8.18    2.60 
  -6  -2   1   12.84    2.46 
  -6  -2   1   11.90    2.89 
   6   2  -1   10.35    2.20 
   6   2  -1   12.67    2.33 
  -6   2   1    6.63    2.10 
   6   2  -1    8.82    2.42 
   6   2  -1   12.25    1.98 
   6   2  -1   15.02    2.52 
  -6   2   1   12.78    2.94 
  -6   2   1    8.94    2.96 
  -6   2   1    4.28    2.52 
   6   2  -1   10.37    2.31 
  -6   2   1   10.15    2.46 
  -6   2   1    9.76    1.54 
  -6   2   1    8.36    1.76 
  -6   2   1    7.61    2.25 
  -6   2   1    9.67    2.44 
   6   2  -1   12.77    2.00 
  -6   2   1   12.78    2.65 
   6   2  -1   11.06    1.90 
   6   2  -1    9.53    2.41 
  -6   2   1   10.64    2.91 
   6   2  -1    7.58    2.16 
   6   2  -1    7.77    2.99 
   5  -2  -1   65.13    5.53 
  -5  -2   1   67.24    5.99 
   5  -2  -1   55.49    5.49 
   5  -2  -1   63.29    5.39 
   5  -2  -1   68.03    5.74 
  -5  -2   1   66.59    5.13 
  -5  -2   1   70.27    5.71 
  -5  -2   1   60.26    5.60 
  -5  -2   1   77.97    5.59 
   5  -2  -1   62.24    4.91 
   5  -2  -1   75.80    6.46 
  -5  -2   1   64.06    5.64 
   5  -2  -1   65.37    5.51 
   5  -2  -1   62.38    5.87 
   5  -2  -1   67.26    5.33 
  -5  -2   1   64.80    4.84 
   5  -2  -1   64.36    5.59 
   5  -2  -1   70.47    5.32 
  -5  -2   1   63.01    5.18 
  -5  -2   1   66.50    5.92 
  -5  -2   1   57.16    5.58 
   5  -2  -1   69.54    5.63 
   5  -2  -1   75.31    6.21 
   5   2  -1   65.30    5.29 
   5   2  -1   67.06    5.43 
   5   2  -1   70.40    5.14 
  -5   2   1   70.72    5.64 
  -5   2   1   72.15    6.47 
   5   2  -1   68.77    5.11 
   5   2  -1   68.00    5.63 
   5   2  -1   65.41    5.08 
  -5   2   1   76.17    5.92 
  -5   2   1   62.74    5.52 
   5   2  -1   66.71    5.28 
   5   2  -1   65.29    5.42 
  -5   2   1   65.92    4.89 
  -5   2   1   60.33    5.77 
   5   2  -1   68.34    5.76 
   5   2  -1   76.27    5.68 
  -5   2   1   56.72    5.21 
  -5   2   1   71.58    6.24 
   5   2  -1   61.85    5.44 
  -5   2   1   66.47    5.05 
  -5   2   1   70.94    6.15 
   5   2  -1   63.30    5.30 
  -5   2   1   62.06    5.70 
   5   2  -1   62.64    4.61 
  -5   2   1   70.19    5.15 
  -5   2   1   68.46    5.77 
  -4  -2   1   72.35    5.32 
  -4  -2   1   77.22    5.21 
  -4  -2   1   76.29    5.84 
  -4  -2   1   76.63    5.57 
   4  -2  -1   73.23    5.51 
  -4  -2   1   75.42    5.90 
   4  -2  -1   63.11    5.75 
  -4  -2   1   83.27    5.96 
   4  -2  -1   66.14    5.84 
   4  -2  -1   71.69    5.26 
   4  -2  -1   71.39    5.42 
  -4  -2   1   70.10    6.07 
  -4  -2   1   68.93    5.99 
  -4  -2   1   73.85    5.10 
   4  -2  -1   73.35    5.80 
  -4  -2   1   70.05    5.36 
   4  -2  -1   76.98    6.43 
  -4  -2   1   71.33    5.32 
   4  -2  -1   75.09    5.74 
  -4  -2   1   81.54    5.93 
   4  -2  -1   72.99    5.59 
   4  -2  -1   79.51    5.86 
   4  -2  -1   81.45    6.23 
  -4  -2   1   82.10    5.73 
   4  -2  -1   69.89    6.13 
   4  -2  -1   71.81    5.90 
   4  -2  -1   72.33    5.77 
   4   2  -1   71.24    5.53 
   4   2  -1   75.21    5.47 
  -4   2   1   61.62    5.39 
  -4   2   1   74.59    6.02 
  -4   2   1   72.54    6.42 
  -4   2   1   76.77    6.02 
  -4   2   1   67.71    6.06 
   4   2  -1   74.25    5.35 
   4   2  -1   72.79    5.69 
  -4   2   1   70.62    5.95 
  -4   2   1   69.30    5.22 
   4   2  -1   67.71    5.09 
   4   2  -1   73.65    5.74 
  -4   2   1   73.73    5.81 
   4   2  -1   73.60    5.72 
  -4   2   1   74.29    5.26 
  -4   2   1   65.38    6.14 
  -4   2   1   70.46    5.42 
   4   2  -1   72.54    5.63 
   4   2  -1   70.76    5.81 
  -4   2   1   69.72    5.93 
   4   2  -1   68.81    5.40 
  -4   2   1   82.16    5.81 
   4   2  -1   73.34    5.40 
   4   2  -1   77.53    5.32 
   4   2  -1   83.27    5.63 
   3  -2  -1   48.29    4.01 
   3  -2  -1   49.94    4.44 
  -3  -2   1   57.72    4.63 
  -3  -2   1   55.69    4.35 
  -3  -2   1   57.04    4.32 
   3  -2  -1   57.26    4.67 
  -3  -2   1   54.42    4.08 
  -3  -2   1   57.33    4.18 
  -3  -2   1   58.59    4.90 
   3  -2  -1   51.77    4.63 
   3  -2  -1   58.25    4.52 
  -3  -2   1   53.66    4.52 
   3  -2  -1   51.40    4.78 
  -3  -2   1   53.43    4.04 
  -3  -2   1   51.27    4.56 
   3  -2  -1   60.67    5.09 
   3  -2  -1   56.27    4.37 
   3  -2  -1   56.52    4.70 
  -3  -2   1   55.91    4.72 
   3  -2  -1   54.10    4.25 
   3  -2  -1   55.22    4.34 
   3  -2  -1   62.12    4.70 
  -3  -2   1   56.62    4.45 
  -3  -2   1   59.81    4.14 
  -3  -2   1   57.02    4.09 
   3  -2  -1   53.11    4.46 
  -3  -2   1   56.98    4.47 
   3  -2  -1   57.50    4.60 
  -3  -2   1   58.57    4.01 
   3  -2  -1   49.46    4.80 
   3   2  -1   55.31    4.20 
  -3   2   1   58.21    4.52 
  -3   2   1   58.93    5.30 
  -3   2   1   52.20    4.31 
  -3   2   1   52.15    3.87 
   3   2  -1   55.55    4.10 
   3   2  -1   60.44    4.55 
   3   2  -1   54.70    4.08 
  -3   2   1   53.88    4.36 
  -3   2   1   55.90    4.70 
  -3   2   1   46.38    4.63 
   3   2  -1   52.75    3.90 
   3   2  -1   55.17    4.22 
  -3   2   1   48.07    4.37 
  -3   2   1   58.82    4.80 
   3   2  -1   61.13    4.23 
   3   2  -1   52.49    4.40 
  -3   2   1   60.22    4.33 
  -3   2   1   54.28    4.97 
   3   2  -1   56.79    4.51 
  -3   2   1   52.83    4.52 
  -3   2   1   59.97    4.97 
   3   2  -1   57.12    4.63 
  -3   2   1   51.58    5.07 
   3   2  -1   58.82    4.90 
  -3   2   1   63.09    4.84 
  -3   2   1   53.06    4.24 
   3   2  -1   61.64    4.51 
   3   2  -1   57.80    4.22 
   3   2  -1   59.44    4.29 
  -3   2   1   51.75    4.83 
   3   2  -1   49.83    3.80 
  -3   2   1   54.90    4.17 
  -2  -2   1   19.06    1.81 
   2  -2  -1   22.82    2.43 
  -2  -2   1   17.47    1.81 
   2  -2  -1   18.97    2.06 
   2  -2  -1   16.23    1.79 
   2  -2  -1   21.96    2.12 
  -2  -2   1   20.83    1.96 
   2  -2  -1   21.60    2.55 
   2  -2  -1   18.51    1.68 
   2  -2  -1   17.54    2.33 
  -2  -2   1   15.86    1.45 
  -2  -2   1   18.82    2.24 
   2  -2  -1   16.77    2.12 
   2  -2  -1   16.51    1.73 
   2  -2  -1   15.13    1.95 
  -2  -2   1   16.34    1.98 
  -2  -2   1   19.47    2.19 
  -2  -2   1   18.33    1.85 
   2  -2  -1   20.00    2.22 
  -2  -2   1   18.24    2.08 
  -2  -2   1   20.19    1.97 
  -2  -2   1   18.87    2.38 
   2  -2  -1   19.12    2.25 
   2  -2  -1   19.33    2.11 
   2  -2  -1   19.49    2.27 
  -2  -2   1   23.45    1.94 
  -2  -2   1   16.67    1.83 
  -2  -2   1   19.74    2.19 
   2  -2  -1   18.44    2.13 
   2  -2  -1   15.53    2.17 
   2  -2  -1   19.05    2.09 
   2  -2  -1   22.37    2.58 
   2  -2  -1   19.05    1.96 
  -2  -2   1   17.05    1.82 
   2  -2  -1   20.54    2.19 
  -2  -2   1   17.18    1.39 
  -2  -2   1   20.10    1.81 
   2  -2  -1   22.16    2.23 
  -2  -2   1   19.05    1.95 
   2  -2  -1   18.27    2.25 
   2  -2  -1   20.79    2.35 
  -2  -2   1   18.17    1.65 
   2   2  -1   18.79    1.91 
   2   2  -1   19.22    2.13 
   2   2  -1   17.24    1.95 
   2   2  -1   19.59    1.63 
  -2   2   1   16.07    2.03 
  -2   2   1   15.06    1.91 
   2   2  -1   19.44    1.79 
  -2   2   1   19.39    2.01 
   2   2  -1   18.15    1.68 
  -2   2   1   16.52    2.09 
   2   2  -1   20.35    2.09 
  -2   2   1   16.95    2.23 
   2   2  -1   19.51    2.12 
   2   2  -1   21.53    1.72 
   2   2  -1   17.35    2.09 
   2   2  -1   18.80    1.66 
   2   2  -1   19.38    2.05 
   2   2  -1   21.94    1.61 
  -2   2   1   20.34    2.06 
  -2   2   1   17.44    2.13 
  -2   2   1   19.51    2.05 
  -2   2   1   18.88    2.15 
   2   2  -1   17.72    1.46 
   2   2  -1   18.44    2.05 
  -2   2   1   21.85    2.50 
  -2   2   1   17.67    2.52 
  -2   2   1   17.43    1.88 
  -2   2   1   18.79    2.18 
  -2   2   1   16.68    1.74 
  -2   2   1   18.82    2.13 
   2   2  -1   18.24    1.55 
  -2   2   1   18.63    2.02 
   2   2  -1   18.45    1.57 
  -2   2   1   18.92    2.59 
   2   2  -1   20.20    2.24 
  -2   2   1   16.74    2.15 
   2   2  -1   17.47    1.76 
  -2   2   1   20.00    2.26 
  -2   2   1   17.76    2.31 
   2   2  -1   20.09    2.02 
   1  -2  -1    0.04    0.80 
  -1  -2   1    0.20    0.59 
   1  -2  -1    0.46    0.77 
   1  -2  -1    0.34    0.61 
   1  -2  -1    0.51    0.67 
   1  -2  -1   -0.12    0.76 
  -1  -2   1    1.03    0.66 
   1  -2  -1    1.30    1.41 
  -1  -2   1    0.21    0.68 
  -1  -2   1    0.41    0.70 
  -1  -2   1    0.63    0.59 
  -1  -2   1   -0.10    0.53 
   1  -2  -1    0.91    1.00 
  -1  -2   1   -0.11    0.53 
   1  -2  -1   -0.53    0.79 
  -1  -2   1    0.21    0.73 
  -1  -2   1   -0.26    0.45 
  -1  -2   1    0.39    0.60 
   1  -2  -1    2.33    1.19 
   1  -2  -1   -0.72    0.68 
   1  -2  -1   -0.26    1.12 
   1  -2  -1   -0.79    0.78 
   1  -2  -1   -0.25    0.76 
  -1  -2   1    0.16    0.46 
   1  -2  -1    0.03    0.61 
  -1  -2   1   -0.07    0.69 
  -1  -2   1    0.23    0.77 
   1  -2  -1    1.09    0.75 
   1  -2  -1   -1.41    1.24 
   1  -2  -1   -0.78    0.77 
   1  -2  -1   -1.05    0.88 
   1  -2  -1   -1.32    0.70 
  -1  -2   1    1.80    0.86 
  -1  -2   1    0.38    0.51 
   1  -2  -1   -0.02    1.12 
  -1  -2   1    0.26    0.70 
   1  -2  -1    1.54    1.09 
  -1  -2   1   -0.14    0.53 
  -1  -2   1   -0.05    0.53 
  -1  -2   1   -0.31    0.73 
   1   2  -1   -0.53    0.73 
   1   2  -1    0.00    0.32 
   1   2  -1   -0.16    0.49 
  -1   2   1    1.15    0.63 
   1   2  -1    2.50    0.54 
  -1   2   1    0.56    1.27 
  -1   2   1    0.42    0.70 
  -1   2   1    1.25    1.00 
   1   2  -1    0.24    0.78 
  -1   2   1    1.31    0.76 
  -1   2   1   -0.43    0.82 
   1   2  -1    0.27    0.55 
  -1   2   1   -0.83    0.68 
  -1   2   1    0.87    0.95 
   1   2  -1   -0.03    0.47 
  -1   2   1   -0.09    1.02 
  -1   2   1   -0.75    0.54 
   1   2  -1    0.06    0.45 
  -1   2   1   -0.56    0.47 
  -1   2   1    1.24    1.07 
   1   2  -1    0.38    0.64 
   1   2  -1    0.35    0.70 
   1   2  -1   -0.63    0.65 
   1   2  -1   -0.11    0.62 
  -1   2   1   -0.19    1.07 
  -1   2   1    0.83    0.95 
   1   2  -1    0.03    0.47 
  -1   2   1   -0.43    0.81 
  -1   2   1   -0.46    0.68 
   1   2  -1    0.19    0.69 
  -1   2   1    0.80    1.41 
  -1   2   1    0.85    0.80 
   1   2  -1    0.08    0.63 
  -1   2   1    1.34    1.21 
   1   2  -1    1.42    0.73 
   1   2  -1    1.46    0.60 
  -1   2   1   -0.29    0.62 
   0  -2  -1   15.67    1.92 
   0  -2  -1   17.74    2.92 
   0  -2  -1   21.34    2.22 
   0  -2   1   19.65    2.18 
   0  -2   1   20.71    1.88 
   0  -2   1   20.13    1.56 
   0  -2   1   13.40    2.49 
   0  -2  -1   13.62    3.89 
   0  -2  -1   16.94    2.85 
   0  -2  -1   18.14    2.19 
   0  -2  -1   24.99    2.46 
   0  -2   1   20.13    1.57 
   0  -2  -1   22.81    2.32 
   0  -2   1   11.35    2.23 
   0  -2   1   15.11    2.55 
   0  -2   1   20.60    2.76 
   0  -2  -1   22.50    2.82 
   0  -2  -1   18.34    2.03 
   0  -2   1   12.79    2.62 
   0  -2   1   18.41    3.12 
   0  -2   1   11.38    2.40 
   0  -2  -1   27.97    2.60 
   0  -2   1   20.84    1.85 
   0  -2   1   22.28    1.94 
   0  -2   1   20.24    1.90 
   0  -2  -1   20.44    2.72 
   0  -2   1   16.75    2.64 
   0  -2   1   15.94    2.79 
   0  -2  -1   26.91    2.41 
   0  -2  -1   22.60    3.13 
   0  -2  -1   14.64    2.57 
   0  -2  -1   24.26    2.83 
   0  -2   1   21.60    2.70 
   0  -2  -1   18.01    2.20 
   0  -2  -1   13.85    2.85 
   0  -2   1   17.86    1.89 
   0  -2  -1   18.52    2.12 
   0  -2   1   22.37    1.83 
   0  -2  -1   22.36    2.17 
   0   2  -1   23.15    2.52 
   0   2   1   13.21    2.96 
   0   2   1   23.39    4.60 
   0   2   1   13.61    2.65 
   0   2  -1   19.02    1.89 
   0   2   1   18.52    3.05 
   0   2  -1   20.02    2.19 
   0   2   1   17.57    2.13 
   0   2   1   19.63    2.13 
   0   2   1   20.34    2.10 
   0   2  -1   18.72    1.82 
   0   2  -1   21.16    1.93 
   0   2   1   19.76    2.27 
   0   2  -1   16.09    2.33 
   0   2  -1   13.72    2.62 
   0   2  -1   18.99    2.82 
   0   2   1   23.77    2.18 
   0   2  -1   22.54    2.02 
   0   2  -1   20.94    2.81 
   0   2  -1   19.35    1.79 
   0   2   1   13.30    2.24 
   0   2  -1   23.57    1.88 
   0   2   1   19.25    1.78 
   0   2  -1   18.73    1.57 
   0   2  -1   18.21    2.48 
   0   2  -1   18.56    1.70 
   0   2   1   20.35    2.14 
   0   2   1   20.35    2.16 
   0   2   1   19.59    2.13 
   0   2  -1   14.50    2.38 
   0   2   1   15.38    2.65 
   0   2   1   17.66    2.08 
   0   2  -1   19.82    1.70 
   0   2   1   21.37    2.19 
   0   2  -1   19.92    2.08 
   0   2   1   12.27    2.51 
   0   2  -1   21.42    1.62 
   1  -2   1  175.81   11.89 
   1  -2   1  181.17   11.91 
  -1  -2  -1  169.01   12.03 
  -1  -2  -1  180.87   11.90 
   1  -2   1  212.50   12.59 
  -1  -2  -1  168.18   11.78 
   1  -2   1  175.94   11.88 
  -1  -2  -1  209.40   13.54 
   1  -2   1  174.53   11.80 
  -1  -2  -1  167.90   12.01 
   1  -2   1  164.62   11.82 
  -1  -2  -1  172.49   11.87 
  -1  -2  -1  185.43   12.04 
   1  -2   1  181.28   12.17 
  -1  -2  -1  168.89   11.83 
  -1  -2  -1  180.82   12.25 
   1  -2   1  173.91   11.81 
  -1  -2  -1  184.45   11.94 
  -1  -2  -1  171.73   11.88 
   1  -2   1  174.43   12.26 
   1  -2   1  182.46   11.90 
  -1  -2  -1  176.72   11.96 
   1  -2   1  174.69   11.86 
   1  -2   1  195.32   12.58 
   1  -2   1  169.80   12.05 
  -1  -2  -1  180.18   11.93 
   1  -2   1  159.60   11.78 
   1  -2   1  195.90   12.53 
  -1  -2  -1  164.14   11.81 
   1  -2   1  183.92   12.08 
  -1  -2  -1  175.47   11.80 
   1  -2   1  198.66   12.64 
   1  -2   1  180.20   11.80 
  -1  -2  -1  185.21   11.94 
  -1  -2  -1  174.13   11.91 
   1  -2   1  174.71   11.74 
  -1  -2  -1  182.87   11.96 
   1  -2   1  182.56   12.64 
  -1  -2  -1  193.52   12.01 
  -1  -2  -1  177.09   12.08 
   1  -2   1  175.06   12.12 
  -1  -2  -1  175.55   12.13 
  -1  -2  -1  163.92   11.63 
  -1  -2  -1  180.04   11.96 
   1  -2   1  179.98   12.23 
  -1   2  -1  188.94   12.35 
  -1   2  -1  178.20   12.31 
  -1   2  -1  183.65   11.92 
  -1   2  -1  199.26   12.13 
  -1   2  -1  169.76   11.87 
  -1   2  -1  170.51   11.86 
   1   2   1  170.32   12.06 
  -1   2  -1  153.86   12.57 
   1   2   1  172.57   11.83 
  -1   2  -1  176.15   11.83 
   1   2   1  182.16   11.92 
   1   2   1  175.19   11.84 
  -1   2  -1  171.12   11.82 
  -1   2  -1  169.08   11.85 
  -1   2  -1  200.89   12.22 
  -1   2  -1  171.49   12.54 
   1   2   1  168.88   12.00 
  -1   2  -1  177.40   11.80 
   1   2   1  193.41   12.36 
   1   2   1  187.61   12.07 
   1   2   1  177.88   12.00 
  -1   2  -1  179.79   11.79 
  -1   2  -1  161.22   12.30 
   1   2   1  173.46   11.87 
   1   2   1  165.43   11.64 
  -1   2  -1  173.79   11.81 
   1   2   1  175.48   11.96 
   1   2   1  169.20   11.64 
   1   2   1  176.85   11.83 
   1   2   1  186.94   11.95 
   1   2   1  171.22   11.90 
  -1   2  -1  176.67   12.24 
   1   2   1  175.79   11.82 
  -1   2  -1  178.94   11.91 
   1   2   1  177.45   11.93 
   1   2   1  173.16   11.87 
   1   2   1  172.35   12.20 
  -1   2  -1  179.86   12.04 
  -1   2  -1  138.81   12.13 
  -1   2  -1  170.45   11.84 
   1   2   1  173.34   11.92 
   1   2   1  179.24   11.87 
  -1   2  -1  175.02   11.74 
   1   2   1  178.12   11.98 
  -2  -2  -1   74.88    5.39 
   2  -2   1   58.42    5.33 
   2  -2   1   75.79    5.27 
   2  -2   1   66.83    5.21 
  -2  -2  -1   69.25    5.64 
  -2  -2  -1   76.48    5.30 
   2  -2   1   77.18    5.29 
   2  -2   1   68.72    5.07 
  -2  -2  -1   75.07    5.19 
  -2  -2  -1   74.19    5.52 
   2  -2   1   71.15    5.23 
  -2  -2  -1   71.16    5.48 
  -2  -2  -1   70.15    5.54 
  -2  -2  -1   78.87    5.32 
  -2  -2  -1   70.68    5.18 
  -2  -2  -1   76.30    5.21 
   2  -2   1   69.01    5.52 
  -2  -2  -1   71.17    5.33 
  -2  -2  -1   71.60    5.15 
   2  -2   1   72.05    5.25 
   2  -2   1   74.24    5.35 
  -2  -2  -1   71.38    5.24 
  -2  -2  -1   77.74    5.40 
   2  -2   1   72.64    5.64 
   2  -2   1   80.01    5.24 
  -2  -2  -1   69.80    5.01 
   2  -2   1   71.47    5.18 
   2  -2   1   75.82    5.39 
  -2  -2  -1   74.34    5.50 
   2  -2   1   72.47    5.40 
  -2  -2  -1   71.07    5.93 
  -2  -2  -1   69.29    4.88 
   2  -2   1   68.16    5.12 
   2  -2   1   73.78    5.29 
   2  -2   1   67.24    5.44 
  -2  -2  -1   72.87    5.16 
   2  -2   1   71.37    5.32 
  -2  -2  -1   74.57    5.26 
  -2  -2  -1   72.48    5.42 
  -2  -2  -1   67.33    5.16 
  -2  -2  -1   75.18    5.14 
   2  -2   1   70.91    5.35 
   2  -2   1   67.08    5.44 
   2  -2   1   62.77    5.70 
  -2   2  -1   72.29    5.75 
   2   2   1   70.46    5.36 
  -2   2  -1   78.58    5.74 
  -2   2  -1   69.88    5.24 
   2   2   1   74.67    5.26 
   2   2   1   70.18    5.18 
  -2   2  -1   74.16    5.23 
  -2   2  -1   71.43    5.16 
   2   2   1   76.45    5.31 
   2   2   1   70.56    5.30 
   2   2   1   78.58    5.43 
  -2   2  -1   67.75    4.88 
  -2   2  -1   78.22    5.26 
   2   2   1   76.27    5.58 
   2   2   1   71.85    5.21 
   2   2   1   73.07    5.23 
  -2   2  -1   70.22    5.25 
  -2   2  -1   73.66    5.74 
   2   2   1   75.28    5.29 
   2   2   1   71.65    5.31 
  -2   2  -1   73.92    5.39 
   2   2   1   77.05    5.32 
   2   2   1   70.63    5.18 
  -2   2  -1   77.54    5.64 
   2   2   1   70.97    5.02 
   2   2   1   74.64    5.14 
   2   2   1   69.38    5.17 
  -2   2  -1   73.03    5.48 
   2   2   1   71.43    5.35 
  -2   2  -1   70.42    5.65 
   2   2   1   68.37    4.85 
  -2   2  -1   69.64    5.20 
  -2   2  -1   68.37    5.01 
  -2   2  -1   69.45    5.18 
  -2   2  -1   70.20    5.44 
  -2   2  -1   77.04    5.25 
   2   2   1   67.32    5.15 
  -2   2  -1   65.69    5.33 
   2   2   1   68.99    4.91 
  -2   2  -1   64.19    5.26 
  -2   2  -1   73.32    5.31 
  -3  -2  -1   43.76    3.26 
  -3  -2  -1   42.18    3.87 
  -3  -2  -1   39.81    3.06 
  -3  -2  -1   36.60    3.56 
   3  -2   1   41.89    3.72 
  -3  -2  -1   34.80    3.09 
  -3  -2  -1   41.89    3.52 
   3  -2   1   36.40    3.86 
  -3  -2  -1   42.89    3.37 
  -3  -2  -1   40.07    3.63 
   3  -2   1   34.36    3.34 
  -3  -2  -1   38.20    3.77 
   3  -2   1   36.80    3.42 
   3  -2   1   37.86    3.00 
  -3  -2  -1   41.40    3.27 
  -3  -2  -1   35.22    3.48 
   3  -2   1   41.55    3.24 
  -3  -2  -1   43.41    3.81 
   3  -2   1   40.46    3.49 
  -3  -2  -1   36.72    3.07 
   3  -2   1   36.41    3.16 
  -3  -2  -1   40.16    3.52 
   3  -2   1   40.15    3.71 
   3  -2   1   42.41    4.71 
   3  -2   1   37.86    3.61 
  -3  -2  -1   38.20    3.26 
  -3  -2  -1   33.92    2.90 
   3  -2   1   36.56    3.33 
   3  -2   1   40.18    3.53 
   3  -2   1   34.43    3.51 
  -3   2  -1   35.29    3.67 
  -3   2  -1   34.79    3.24 
  -3   2  -1   35.10    3.00 
   3   2   1   40.20    2.74 
   3   2   1   35.43    3.06 
   3   2   1   38.17    3.38 
   3   2   1   39.89    3.44 
   3   2   1   39.23    3.33 
  -3   2  -1   36.42    3.38 
  -3   2  -1   41.18    4.16 
  -3   2  -1   38.18    3.45 
  -3   2  -1   42.31    3.92 
   3   2   1   36.28    3.49 
   3   2   1   35.15    3.40 
  -3   2  -1   38.37    3.30 
  -3   2  -1   36.93    3.21 
   3   2   1   40.53    3.25 
  -3   2  -1   36.96    3.11 
  -3   2  -1   40.75    3.56 
   3   2   1   43.29    3.40 
   3   2   1   36.14    3.75 
   3   2   1   38.76    3.17 
  -3   2  -1   42.08    3.95 
   3   2   1   40.06    3.25 
   3   2   1   38.11    3.61 
  -3   2  -1   32.85    3.81 
   3   2   1   38.66    3.31 
   3   2   1   40.54    3.18 
  -3   2  -1   40.31    3.63 
   3   2   1   38.94    3.38 
  -3   2  -1   38.04    3.24 
   3   2   1   34.44    3.52 
  -3   2  -1   41.53    4.28 
  -3   2  -1   41.25    3.66 
   4  -2   1   61.75    4.78 
  -4  -2  -1   63.15    5.28 
   4  -2   1   56.36    6.01 
   4  -2   1   59.34    5.01 
   4  -2   1   56.38    5.14 
  -4  -2  -1   68.01    5.13 
  -4  -2  -1   66.64    4.99 
  -4  -2  -1   65.10    5.09 
  -4  -2  -1   60.21    5.30 
   4  -2   1   67.57    5.06 
  -4  -2  -1   61.19    5.11 
  -4  -2  -1   62.16    4.59 
   4  -2   1   62.10    4.90 
  -4  -2  -1   68.04    5.25 
   4  -2   1   67.15    4.66 
   4  -2   1   57.06    4.67 
   4  -2   1   64.06    5.19 
  -4  -2  -1   58.30    4.62 
  -4  -2  -1   57.22    4.67 
   4  -2   1   66.53    5.21 
  -4  -2  -1   62.07    5.22 
   4  -2   1   54.62    5.26 
   4  -2   1   59.45    5.13 
  -4  -2  -1   59.12    4.50 
   4  -2   1   55.50    4.91 
  -4  -2  -1   63.56    4.65 
   4  -2   1   58.42    4.98 
   4  -2   1   62.71    4.60 
  -4  -2  -1   57.03    5.06 
  -4   2  -1   56.86    5.20 
   4   2   1   63.11    4.85 
  -4   2  -1   66.23    5.07 
  -4   2  -1   59.50    5.32 
   4   2   1   58.73    5.00 
   4   2   1   66.05    4.93 
   4   2   1   63.76    5.07 
  -4   2  -1   61.64    4.85 
   4   2   1   68.23    4.91 
   4   2   1   62.33    4.67 
  -4   2  -1   57.08    5.56 
  -4   2  -1   56.43    5.48 
  -4   2  -1   52.74    5.07 
   4   2   1   61.29    4.64 
  -4   2  -1   62.43    5.42 
  -4   2  -1   54.32    4.61 
   4   2   1   50.87    4.47 
   4   2   1   64.27    5.15 
  -4   2  -1   70.29    5.40 
   4   2   1   72.39    5.06 
  -4   2  -1   59.67    4.71 
   4   2   1   64.01    4.95 
   4   2   1   62.47    4.49 
  -4   2  -1   57.22    4.64 
   4   2   1   61.75    5.00 
  -4   2  -1   58.05    5.26 
  -4   2  -1   52.51    4.94 
   4   2   1   59.18    4.77 
  -4   2  -1   61.35    4.78 
  -5  -2  -1   49.69    4.35 
  -5  -2  -1   49.47    4.90 
   5  -2   1   52.17    4.37 
   5  -2   1   59.45    4.77 
   5  -2   1   50.43    4.82 
   5  -2   1   54.35    4.75 
  -5  -2  -1   53.36    4.23 
  -5  -2  -1   50.43    4.53 
   5  -2   1   56.60    4.87 
  -5  -2  -1   51.38    4.86 
  -5  -2  -1   52.59    4.89 
  -5  -2  -1   48.21    5.38 
   5  -2   1   51.77    4.68 
   5  -2   1   53.15    4.93 
  -5  -2  -1   58.90    4.94 
   5  -2   1   53.68    4.86 
   5  -2   1   52.63    5.16 
   5  -2   1   52.46    4.60 
   5  -2   1   48.86    4.95 
  -5  -2  -1   52.34    4.98 
  -5  -2  -1   55.45    4.82 
   5  -2   1   58.67    6.39 
  -5  -2  -1   49.26    5.00 
   5  -2   1   52.51    4.39 
  -5  -2  -1   50.81    4.19 
  -5   2  -1   58.47    5.15 
  -5   2  -1   51.56    5.45 
   5   2   1   51.18    3.93 
   5   2   1   64.56    4.83 
   5   2   1   60.43    4.90 
   5   2   1   49.48    4.31 
  -5   2  -1   45.70    4.64 
   5   2   1   54.24    4.48 
  -5   2  -1   60.28    5.02 
   5   2   1   54.31    4.69 
   5   2   1   53.08    4.57 
   5   2   1   52.20    4.86 
   5   2   1   56.44    4.70 
   5   2   1   59.12    4.58 
   5   2   1   51.42    4.46 
   5   2   1   51.26    3.81 
  -5   2  -1   47.77    5.02 
  -5   2  -1   54.66    5.25 
  -5   2  -1   51.51    5.29 
  -5   2  -1   45.45    4.21 
  -5   2  -1   54.05    5.14 
  -5   2  -1   65.46    4.96 
   5   2   1   55.32    4.85 
  -5   2  -1   48.03    4.41 
  -5   2  -1   53.68    5.75 
   5   2   1   52.00    4.71 
  -6  -2  -1   76.18    6.82 
  -6  -2  -1   85.23    6.45 
  -6  -2  -1   78.35    6.80 
   6  -2   1   68.63    7.01 
  -6  -2  -1   73.64    6.66 
  -6  -2  -1   81.66    6.11 
  -6  -2  -1   73.17    6.24 
   6  -2   1   61.07    8.01 
  -6  -2  -1   81.13    7.33 
   6  -2   1   87.64    6.67 
  -6  -2  -1   81.32    6.93 
  -6  -2  -1   75.19    7.05 
   6  -2   1   79.24    6.67 
  -6  -2  -1   87.16    6.04 
   6  -2   1   74.90    6.73 
   6  -2   1   83.67    6.66 
   6  -2   1   86.00    6.37 
  -6  -2  -1   80.77    6.90 
   6  -2   1   84.75    6.99 
   6  -2   1   73.50    6.63 
  -6  -2  -1   79.88    7.07 
   6  -2   1   77.59    6.87 
   6  -2   1   81.77    6.87 
   6  -2   1   76.73    6.97 
   6  -2   1   75.72    6.17 
  -6   2  -1   77.26    6.12 
  -6   2  -1   74.18    7.22 
  -6   2  -1   74.29    7.38 
   6   2   1   88.58    6.79 
   6   2   1   81.08    6.38 
  -6   2  -1   74.41    7.57 
   6   2   1   85.11    6.39 
  -6   2  -1   82.93    7.10 
   6   2   1   74.75    6.50 
  -6   2  -1   76.63    6.96 
  -6   2  -1   78.07    7.17 
  -6   2  -1   73.60    6.69 
   6   2   1   91.51    6.66 
   6   2   1   80.29    6.69 
  -6   2  -1   77.54    7.03 
   6   2   1   79.41    6.65 
  -6   2  -1   92.34    6.90 
   6   2   1   77.13    6.76 
  -6   2  -1   77.24    6.29 
   6   2   1   81.18    6.81 
  -6   2  -1   79.68    6.88 
   6   2   1   85.18    6.63 
   7  -2   1  143.81   10.63 
  -7  -2  -1  137.94   10.95 
  -7  -2  -1  155.62   11.11 
   7  -2   1  152.61   10.46 
  -7  -2  -1  136.23   11.18 
   7  -2   1  131.83   10.08 
   7  -2   1  145.12   11.29 
  -7  -2  -1  131.27   10.05 
   7  -2   1  133.95   12.08 
   7  -2   1  141.42   10.77 
  -7  -2  -1  134.63   10.76 
  -7  -2  -1  142.87   11.51 
   7  -2   1  133.96   10.27 
   7  -2   1  142.04   11.02 
  -7  -2  -1  144.20   10.95 
   7  -2   1  147.93   10.89 
   7  -2   1  126.15   11.27 
  -7  -2  -1  125.96   10.24 
   7  -2   1  151.94   10.90 
  -7  -2  -1  140.58    9.92 
  -7  -2  -1  144.98   10.39 
  -7  -2  -1  130.71   10.87 
  -7  -2  -1  136.62   11.18 
   7  -2   1  138.14   10.80 
   7  -2   1  133.90   10.90 
  -7   2  -1  142.01   11.06 
   7   2   1  137.82   10.29 
   7   2   1  142.20   10.40 
  -7   2  -1  129.66   11.24 
   7   2   1  128.82   10.58 
  -7   2  -1  130.40   11.68 
   7   2   1  130.04   10.74 
   7   2   1  138.65   10.78 
  -7   2  -1  142.67   10.87 
   7   2   1  141.33   10.67 
  -7   2  -1  140.42   10.20 
  -7   2  -1  139.84   10.00 
   7   2   1  145.44   10.96 
  -7   2  -1  132.41   11.07 
   7   2   1  145.85   10.47 
   7   2   1  151.57   11.09 
  -7   2  -1  140.93   11.84 
   7   2   1  138.45   10.66 
   7   2   1  140.70   10.81 
  -7   2  -1  137.68   10.84 
  -7   2  -1  156.93   11.77 
  -7   2  -1  139.85   11.12 
  -7   2  -1  148.17   11.06 
  -8  -2  -1   90.29    8.52 
   8  -2   1   83.12    7.40 
   8  -2   1   77.38    7.63 
  -8  -2  -1   81.45    7.58 
   8  -2   1   86.80    7.59 
   8  -2   1   92.74    7.90 
   8  -2   1   90.04    7.20 
  -8  -2  -1   81.70    7.87 
  -8  -2  -1   92.20    7.94 
  -8  -2  -1   86.70    7.76 
  -8  -2  -1   81.75    7.73 
  -8  -2  -1   74.45    7.92 
   8  -2   1   80.93    9.88 
   8  -2   1   86.74    7.58 
  -8  -2  -1   76.12    7.09 
  -8  -2  -1   71.41    6.69 
  -8  -2  -1   72.87    8.38 
   8  -2   1   86.45    8.95 
   8  -2   1   86.34    7.60 
   8  -2   1   79.18    7.45 
   8   2   1   85.58    7.82 
  -8   2  -1   76.39    8.41 
   8   2   1   75.02    7.02 
   8   2   1   73.36    6.88 
  -8   2  -1   94.81    8.00 
   8   2   1   80.24    7.31 
  -8   2  -1   84.79    8.70 
  -8   2  -1   72.78    8.70 
  -8   2  -1   82.41    8.33 
  -8   2  -1   75.95    8.28 
   8   2   1   79.89    7.66 
  -8   2  -1   86.68    7.92 
  -8   2  -1   89.00    7.77 
  -8   2  -1   86.95    7.90 
   8   2   1   79.81    8.50 
   8   2   1   80.19    7.69 
   8   2   1   82.35    7.35 
   8   2   1   82.19    7.67 
   8   2   1   83.83    7.36 
   8   2   1   76.98    7.79 
  -8   2  -1   77.56    7.99 
   9  -2   1  104.16    8.57 
  -9  -2  -1   91.13    9.31 
   9  -2   1   84.76    8.48 
  -9  -2  -1  108.59    9.22 
   9  -2   1  104.93    8.38 
  -9  -2  -1   94.37    8.92 
  -9  -2  -1   74.23    8.70 
   9  -2   1  108.31    9.98 
  -9  -2  -1   89.04   10.09 
  -9  -2  -1   84.71    7.94 
  -9  -2  -1   91.51    9.09 
  -9  -2  -1   95.80    9.17 
  -9  -2  -1   89.06    9.14 
   9  -2   1   84.75    8.64 
   9  -2   1   91.02    8.56 
   9  -2   1  105.15    8.31 
  -9  -2  -1  110.32    9.10 
   9  -2   1   96.51    8.68 
  -9   2  -1   81.46    9.63 
  -9   2  -1  102.97    8.92 
   9   2   1   95.05    8.83 
  -9   2  -1   95.78    9.91 
  -9   2  -1   92.32    9.49 
  -9   2  -1  104.32    8.92 
  -9   2  -1   99.02   10.56 
   9   2   1   93.27    8.47 
  -9   2  -1   94.57    8.89 
  -9   2  -1   95.48    9.31 
   9   2   1   83.49    8.97 
   9   2   1   95.62    8.75 
   9   2   1   85.43    8.21 
   9   2   1   82.57    8.20 
   9   2   1   91.96    8.23 
  -9   2  -1   92.92    9.06 
   9   2   1   87.58    7.91 
  -9   2  -1   94.50    9.67 
  -9   2  -1   67.30    8.96 
   9   2   1   85.46   10.64 
  -9   2  -1  112.03    9.20 
  10  -2   1   30.30    4.91 
 -10  -2  -1   29.45    4.99 
 -10  -2  -1   29.65    5.49 
 -10  -2  -1   25.30    5.26 
  10  -2   1   23.00    4.50 
  10  -2   1   20.62    4.32 
 -10  -2  -1   23.42    5.42 
  10  -2   1   18.42    5.98 
  10  -2   1   29.97    5.81 
 -10  -2  -1   18.91    4.62 
 -10  -2  -1   21.84    4.99 
 -10  -2  -1   36.80    5.52 
 -10  -2  -1   25.62    5.03 
  10  -2   1   35.83    5.57 
 -10  -2  -1   20.47    4.50 
  10  -2   1   18.85    4.60 
 -10   2  -1   16.67    4.90 
  10   2   1   18.21    4.02 
 -10   2  -1   33.02    5.19 
 -10   2  -1   35.40    5.84 
 -10   2  -1   31.38    5.28 
  10   2   1   24.03    4.37 
 -10   2  -1   25.76    5.75 
  10   2   1   24.12    6.04 
 -10   2  -1   29.07    5.67 
 -10   2  -1   20.03    5.04 
 -10   2  -1   25.57    4.70 
 -10   2  -1   28.49    5.23 
 -10   2  -1   27.39    6.08 
 -10   2  -1   31.33    5.22 
  10   2   1   26.91    4.95 
  10   2   1   28.26    4.58 
  10   2   1   25.59    4.91 
  10   2   1   22.98    4.59 
   9  -3  -1   -3.32    2.20 
  -9  -3   1    1.36    2.53 
  -9  -3   1    1.21    2.69 
  -9  -3   1    3.87    3.11 
  -9  -3   1   -1.31    2.32 
  -9  -3   1   -0.86    2.55 
   9  -3  -1    1.59    2.61 
  -9  -3   1   -1.39    2.23 
   9  -3  -1   -5.10    2.82 
   9  -3  -1    0.85    2.46 
   9  -3  -1    2.24    2.28 
   9  -3  -1    1.63    2.24 
   9  -3  -1   -0.20    2.13 
   9  -3  -1   -3.64    2.30 
  -9  -3   1    2.06    2.77 
   9  -3  -1   -0.75    2.37 
   9  -3  -1    4.67    2.58 
  -9  -3   1    2.42    2.60 
  -9   3   1    1.77    3.53 
  -9   3   1    1.25    3.17 
   9   3  -1   -1.05    2.26 
  -9   3   1    2.07    2.64 
  -9   3   1    4.97    3.27 
  -9   3   1   -2.21    2.96 
  -9   3   1    2.08    3.09 
   9   3  -1   -0.90    1.85 
  -9   3   1    6.41    3.50 
   9   3  -1    0.74    2.55 
   9   3  -1    5.66    2.67 
   9   3  -1   -1.16    2.57 
   9   3  -1   -2.61    3.29 
   9   3  -1    1.41    1.98 
  -9   3   1   -1.75    2.31 
  -9   3   1    0.84    2.97 
  -9   3   1   -0.57    3.21 
  -9   3   1    0.32    2.69 
   8  -3  -1    5.04    2.43 
  -8  -3   1    0.22    2.46 
   8  -3  -1    1.20    2.28 
  -8  -3   1    1.92    2.29 
   8  -3  -1   -1.17    1.85 
   8  -3  -1    0.02    1.97 
   8  -3  -1    2.34    2.41 
  -8  -3   1    4.60    2.31 
   8  -3  -1    1.26    1.97 
  -8  -3   1    0.17    2.25 
   8  -3  -1   -0.04    1.96 
  -8  -3   1    0.84    2.64 
  -8  -3   1    0.86    2.12 
   8  -3  -1    0.37    2.26 
   8  -3  -1    0.87    3.10 
   8  -3  -1    4.14    3.19 
   8  -3  -1    0.20    2.05 
  -8  -3   1   -0.47    2.30 
  -8  -3   1   -0.20    1.57 
  -8  -3   1   -1.25    2.06 
   8  -3  -1    2.40    2.35 
   8   3  -1    1.13    2.07 
  -8   3   1    3.68    3.08 
  -8   3   1    1.94    2.44 
  -8   3   1    1.21    3.32 
   8   3  -1   -1.60    2.03 
  -8   3   1    2.10    2.33 
  -8   3   1    2.50    2.85 
  -8   3   1    4.12    2.57 
  -8   3   1   -1.46    2.82 
   8   3  -1   -0.48    1.48 
  -8   3   1   -0.29    2.18 
   8   3  -1    2.35    1.90 
   8   3  -1   -4.53    1.44 
  -8   3   1    1.41    2.99 
  -8   3   1   -2.57    2.42 
   8   3  -1    0.32    3.02 
   8   3  -1   -1.70    1.72 
   8   3  -1    3.65    2.31 
  -8   3   1    0.02    2.66 
   8   3  -1    3.25    2.75 
  -7  -3   1   34.00    4.41 
   7  -3  -1   44.59    5.34 
   7  -3  -1   45.35    4.88 
  -7  -3   1   40.32    4.94 
   7  -3  -1   41.76    5.07 
  -7  -3   1   35.57    5.22 
  -7  -3   1   39.89    4.74 
   7  -3  -1   34.99    4.59 
  -7  -3   1   40.07    5.59 
  -7  -3   1   30.02    3.92 
  -7  -3   1   39.15    5.14 
   7  -3  -1   43.37    5.31 
  -7  -3   1   44.65    4.06 
   7  -3  -1   43.52    5.02 
   7  -3  -1   43.90    5.06 
  -7  -3   1   39.32    4.93 
   7  -3  -1   36.00    4.31 
  -7  -3   1   50.26    5.45 
   7  -3  -1   41.36    4.35 
   7  -3  -1   40.77    6.23 
   7  -3  -1   37.59    5.45 
   7  -3  -1   41.54    4.97 
   7  -3  -1   33.95    4.55 
   7   3  -1   41.33    4.55 
   7   3  -1   38.89    4.54 
   7   3  -1   42.10    3.95 
  -7   3   1   34.76    4.11 
   7   3  -1   55.30    5.77 
  -7   3   1   51.25    6.25 
   7   3  -1   40.49    5.84 
   7   3  -1   44.06    4.05 
  -7   3   1   37.41    5.09 
   7   3  -1   39.21    4.88 
   7   3  -1   39.12    4.15 
  -7   3   1   43.08    5.30 
  -7   3   1   32.34    5.75 
  -7   3   1   44.25    5.01 
   7   3  -1   41.15    4.77 
  -7   3   1   41.41    5.97 
  -7   3   1   40.99    5.04 
  -7   3   1   41.20    5.09 
   7   3  -1   41.47    4.79 
  -7   3   1   58.09    7.39 
  -7   3   1   30.13    4.91 
   7   3  -1   43.23    5.17 
  -7   3   1   28.70    4.91 
   6  -3  -1   68.86    6.78 
   6  -3  -1   69.21    6.67 
  -6  -3   1   73.53    6.06 
   6  -3  -1   68.19    6.22 
   6  -3  -1   69.72    6.29 
   6  -3  -1   75.02    7.33 
  -6  -3   1   69.81    6.12 
   6  -3  -1   72.66    6.40 
   6  -3  -1   74.99    6.22 
  -6  -3   1   66.32    6.56 
  -6  -3   1   65.07    5.43 
   6  -3  -1   75.38    6.45 
   6  -3  -1   76.32    6.38 
  -6  -3   1   65.03    5.77 
  -6  -3   1   65.97    6.28 
  -6  -3   1   72.17    6.84 
   6  -3  -1   62.11    5.68 
  -6  -3   1   61.81    6.22 
  -6  -3   1   62.46    6.26 
   6  -3  -1   59.47    6.36 
   6  -3  -1   69.74    6.04 
  -6  -3   1   70.51    6.51 
  -6   3   1   63.77    6.18 
  -6   3   1   76.33    7.65 
   6   3  -1   76.52    5.82 
   6   3  -1   64.21    5.99 
  -6   3   1   69.70    6.34 
   6   3  -1   72.48    5.60 
   6   3  -1   68.50    6.92 
   6   3  -1   69.07    5.47 
   6   3  -1   67.95    6.08 
   6   3  -1   71.34    6.23 
   6   3  -1   68.07    5.73 
  -6   3   1   76.56    7.45 
   6   3  -1   70.70    6.49 
  -6   3   1   71.52    6.58 
  -6   3   1   70.08    6.67 
  -6   3   1   70.48    5.84 
   6   3  -1   75.56    6.44 
  -6   3   1   65.73    6.86 
  -6   3   1   71.85    7.11 
  -6   3   1   78.39    6.73 
   6   3  -1   69.50    5.84 
   6   3  -1   62.69    6.47 
  -6   3   1   80.02    6.83 
  -5  -3   1  300.95   20.57 
  -5  -3   1  282.42   20.04 
  -5  -3   1  300.57   19.90 
  -5  -3   1  289.54   20.16 
  -5  -3   1  298.32   20.22 
   5  -3  -1  260.44   19.96 
  -5  -3   1  309.65   19.41 
   5  -3  -1  279.55   20.13 
   5  -3  -1  279.85   20.27 
  -5  -3   1  281.05   19.96 
   5  -3  -1  322.74   20.81 
  -5  -3   1  282.86   19.75 
   5  -3  -1  292.67   20.08 
   5  -3  -1  303.56   19.97 
  -5  -3   1  306.99   20.44 
   5  -3  -1  274.99   20.53 
   5  -3  -1  270.74   20.35 
   5  -3  -1  295.13   20.11 
   5  -3  -1  291.75   19.60 
   5  -3  -1  291.04   20.11 
  -5  -3   1  289.53   19.35 
   5  -3  -1  314.76   20.08 
  -5  -3   1  275.63   19.77 
   5   3  -1  301.99   19.72 
  -5   3   1  296.52   20.40 
   5   3  -1  303.90   19.98 
  -5   3   1  302.88   20.74 
   5   3  -1  290.55   20.02 
  -5   3   1  303.03   20.11 
  -5   3   1  310.51   21.17 
  -5   3   1  272.06   20.23 
  -5   3   1  299.35   20.33 
  -5   3   1  286.68   20.89 
  -5   3   1  293.56   20.29 
  -5   3   1  268.88   20.51 
   5   3  -1  319.96   20.12 
   5   3  -1  278.57   20.36 
   5   3  -1  298.56   20.17 
  -5   3   1  262.04   19.66 
   5   3  -1  289.88   19.62 
   5   3  -1  297.52   19.52 
   5   3  -1  294.92   19.90 
   5   3  -1  298.77   19.79 
  -5   3   1  295.03   19.99 
   5   3  -1  268.82   19.25 
   4  -3  -1   57.13    4.58 
   4  -3  -1   45.96    3.65 
   4  -3  -1   43.81    3.76 
   4  -3  -1   48.34    4.24 
  -4  -3   1   42.37    3.36 
   4  -3  -1   44.43    4.81 
  -4  -3   1   45.62    4.57 
  -4  -3   1   47.83    3.92 
   4  -3  -1   41.50    4.23 
   4  -3  -1   46.83    4.21 
  -4  -3   1   42.51    3.46 
  -4  -3   1   43.02    4.18 
  -4  -3   1   42.08    3.62 
   4  -3  -1   45.00    4.27 
   4  -3  -1   44.40    4.96 
   4  -3  -1   48.33    4.36 
  -4  -3   1   46.65    4.00 
  -4  -3   1   40.05    4.54 
  -4  -3   1   48.05    4.33 
  -4  -3   1   44.07    4.06 
   4  -3  -1   42.32    4.35 
  -4  -3   1   46.63    3.66 
   4  -3  -1   47.51    4.32 
   4  -3  -1   40.05    4.63 
   4   3  -1   45.99    3.66 
  -4   3   1   39.00    3.88 
   4   3  -1   39.88    4.27 
  -4   3   1   52.39    3.98 
   4   3  -1   43.30    3.49 
  -4   3   1   46.91    4.51 
  -4   3   1   41.18    4.25 
  -4   3   1   44.25    4.61 
   4   3  -1   46.03    3.83 
   4   3  -1   48.53    4.01 
  -4   3   1   48.26    5.58 
  -4   3   1   44.52    5.32 
  -4   3   1   43.17    4.89 
   4   3  -1   49.07    4.22 
   4   3  -1   45.69    4.13 
   4   3  -1   41.53    3.22 
  -4   3   1   40.44    4.27 
  -4   3   1   46.38    4.97 
  -4   3   1   49.57    4.49 
  -4   3   1   42.52    3.94 
   4   3  -1   51.12    3.79 
   4   3  -1   45.46    4.07 
   4   3  -1   42.51    3.41 
   4   3  -1   51.48    4.46 
   4   3  -1   45.93    4.18 
   3  -3  -1  278.55   17.15 
  -3  -3   1  243.70   17.10 
   3  -3  -1  218.35   17.28 
  -3  -3   1  240.27   17.20 
  -3  -3   1  257.70   16.72 
   3  -3  -1  246.32   16.64 
  -3  -3   1  258.81   16.63 
   3  -3  -1  250.51   17.06 
   3  -3  -1  240.05   17.02 
   3  -3  -1  245.09   17.18 
   3  -3  -1  227.67   17.33 
   3  -3  -1  253.34   17.05 
  -3  -3   1  242.78   16.75 
   3  -3  -1  247.64   17.31 
  -3  -3   1  255.69   17.04 
   3  -3  -1  245.48   17.20 
  -3  -3   1  244.73   17.29 
   3  -3  -1  250.57   17.20 
   3  -3  -1  234.33   16.62 
  -3  -3   1  270.38   16.75 
  -3  -3   1  258.68   16.79 
  -3  -3   1  256.49   16.77 
  -3  -3   1  254.18   16.71 
  -3  -3   1  228.51   16.33 
   3   3  -1  242.59   17.08 
   3   3  -1  256.22   16.98 
   3   3  -1  244.31   16.28 
   3   3  -1  265.45   16.62 
  -3   3   1  266.15   16.94 
  -3   3   1  272.91   17.98 
  -3   3   1  255.70   16.58 
  -3   3   1  254.50   16.91 
  -3   3   1  245.23   16.97 
  -3   3   1  262.36   17.89 
   3   3  -1  247.56   16.84 
   3   3  -1  239.36   16.55 
   3   3  -1  255.13   16.92 
   3   3  -1  256.56   16.98 
  -3   3   1  248.57   17.39 
   3   3  -1  246.25   16.42 
  -3   3   1  232.76   17.19 
  -3   3   1  238.68   17.08 
  -3   3   1  254.15   17.12 
  -3   3   1  252.56   16.78 
   3   3  -1  250.11   16.93 
   3   3  -1  240.60   16.94 
   3   3  -1  241.96   17.15 
   3   3  -1  257.92   16.41 
  -3   3   1  247.94   17.48 
   3   3  -1  244.11   16.58 
   3   3  -1  259.39   16.88 
  -3   3   1  233.58   17.44 
  -2  -3   1    2.52    1.07 
   2  -3  -1    5.39    1.87 
  -2  -3   1    2.77    0.93 
  -2  -3   1    4.40    1.36 
   2  -3  -1    3.97    1.62 
  -2  -3   1    2.72    2.34 
   2  -3  -1    3.43    1.90 
  -2  -3   1    3.61    1.16 
   2  -3  -1    4.03    1.18 
   2  -3  -1    3.29    1.42 
   2  -3  -1    4.94    1.65 
   2  -3  -1    3.61    1.50 
  -2  -3   1    3.99    1.38 
  -2  -3   1    5.16    1.51 
   2  -3  -1    2.46    1.82 
   2  -3  -1    0.56    1.54 
  -2  -3   1    3.85    1.49 
  -2  -3   1    3.46    1.08 
  -2  -3   1    1.21    1.46 
   2  -3  -1    1.49    1.59 
  -2  -3   1    3.26    1.27 
   2  -3  -1    5.21    1.62 
   2  -3  -1    5.03    1.40 
   2  -3  -1    3.98    1.09 
  -2  -3   1    2.34    1.48 
   2   3  -1    3.64    0.92 
   2   3  -1    3.31    1.13 
  -2   3   1    3.32    1.51 
   2   3  -1    3.96    1.48 
  -2   3   1    2.54    1.87 
  -2   3   1    7.55    1.76 
   2   3  -1    2.62    1.11 
  -2   3   1    4.67    1.11 
   2   3  -1    3.75    1.28 
  -2   3   1    6.22    1.58 
   2   3  -1    3.72    1.62 
   2   3  -1    1.19    1.15 
   2   3  -1    3.97    1.45 
   2   3  -1    2.27    1.02 
  -2   3   1    7.08    2.12 
  -2   3   1    3.04    1.52 
  -2   3   1    1.75    1.37 
   2   3  -1    4.54    1.03 
  -2   3   1    3.82    1.53 
  -2   3   1    4.55    1.65 
   2   3  -1    5.39    1.57 
  -2   3   1    2.05    1.51 
   2   3  -1    2.56    1.63 
  -2   3   1    4.29    2.22 
   2   3  -1    5.69    1.33 
  -2   3   1    5.98    1.94 
   2   3  -1    3.62    1.45 
   2   3  -1    3.14    1.21 
   2   3  -1    4.38    1.02 
   2   3  -1    3.19    1.03 
  -2   3   1    3.72    2.36 
   1  -3  -1  128.58    8.96 
  -1  -3   1  124.62    9.38 
  -1  -3   1  130.58    9.04 
   1  -3  -1  111.79    9.60 
   1  -3  -1  141.04   10.14 
   1  -3  -1  125.87    9.70 
   1  -3  -1  110.68    9.75 
  -1  -3   1  125.28    9.36 
   1  -3  -1  136.23    9.28 
   1  -3  -1  102.33   10.18 
   1  -3  -1  126.59    9.80 
   1  -3  -1  122.41    9.27 
  -1  -3   1  131.65    9.24 
   1  -3  -1  113.77    9.49 
  -1  -3   1  133.65    9.32 
   1  -3  -1  125.68    9.22 
   1  -3  -1  136.95    9.44 
  -1  -3   1  131.80    9.01 
  -1  -3   1  125.41    8.89 
  -1  -3   1  120.91    9.39 
   1  -3  -1  129.31    9.29 
   1  -3  -1  109.64   10.28 
   1  -3  -1  132.22    9.25 
  -1  -3   1  130.77    9.03 
  -1  -3   1  131.79   10.33 
  -1   3   1  120.63    9.05 
   1   3  -1  125.56    9.51 
   1   3  -1  127.15    8.85 
  -1   3   1  127.14    8.95 
   1   3  -1  131.92    9.10 
   1   3  -1  134.31    9.04 
   1   3  -1  129.36    8.75 
   1   3  -1  140.71    9.26 
   1   3  -1  130.43    9.40 
  -1   3   1  129.92    9.20 
   1   3  -1  139.24    9.58 
   1   3  -1  130.49    9.00 
  -1   3   1  131.67    8.99 
  -1   3   1  136.17    9.23 
   1   3  -1  146.17    9.69 
   1   3  -1  127.27    8.98 
   1   3  -1  123.91    8.60 
  -1   3   1  130.56    9.25 
  -1   3   1  128.32    9.89 
   1   3  -1  138.58    8.90 
   1   3  -1  131.09    9.17 
  -1   3   1  124.72    9.08 
  -1   3   1  130.22    9.13 
   1   3  -1  125.51    8.94 
   1   3  -1  140.90    8.97 
   0  -3   1   11.84    2.45 
   0  -3  -1   11.05    1.78 
   0  -3  -1    8.53    2.61 
   0  -3   1    3.40    1.77 
   0  -3  -1    9.60    1.74 
   0  -3   1   12.81    1.59 
   0  -3  -1    5.31    2.52 
   0  -3   1    9.35    2.55 
   0  -3  -1    9.73    2.45 
   0  -3   1    8.24    2.27 
   0  -3   1   12.18    1.24 
   0  -3   1    6.51    2.35 
   0  -3   1    9.95    1.52 
   0  -3   1    6.71    1.50 
   0  -3  -1    8.77    2.27 
   0  -3   1   11.13    1.65 
   0  -3   1    7.49    2.12 
   0  -3  -1    5.99    2.07 
   0  -3   1    3.28    2.17 
   0  -3  -1    2.02    1.93 
   0  -3  -1    8.00    1.28 
   0  -3   1    6.20    2.87 
   0  -3   1    5.59    2.37 
   0  -3  -1    9.10    2.62 
   0  -3   1   12.24    2.65 
   0  -3  -1    6.80    1.54 
   0  -3  -1   10.19    1.79 
   0  -3  -1    6.43    2.26 
   0  -3  -1    7.36    1.84 
   0  -3  -1   11.16    1.80 
   0  -3  -1    4.68    3.44 
   0   3  -1    9.72    1.49 
   0   3   1   12.93    2.56 
   0   3  -1   10.02    1.56 
   0   3  -1    9.02    2.57 
   0   3   1   10.40    1.62 
   0   3   1    7.82    1.63 
   0   3  -1    8.87    2.72 
   0   3  -1    8.73    1.45 
   0   3   1    7.29    1.44 
   0   3   1   10.83    3.03 
   0   3  -1    8.12    2.18 
   0   3   1    7.53    1.70 
   0   3   1   11.41    3.07 
   0   3  -1    9.13    1.71 
   0   3   1    7.38    1.65 
   0   3  -1   13.95    1.82 
   0   3   1   11.46    3.85 
   0   3  -1   11.35    1.96 
   0   3  -1    9.85    1.82 
   0   3   1    8.87    1.57 
   0   3  -1    9.79    1.09 
   0   3   1    7.84    1.28 
   0   3  -1   10.89    1.20 
   0   3   1    7.86    1.59 
   0   3  -1    5.10    2.27 
   0   3   1    8.93    1.74 
   0   3  -1    7.42    1.31 
   0   3  -1    7.03    1.22 
   0   3  -1   10.27    1.35 
   0   3   1    7.75    2.37 
   1  -3   1  512.03   33.06 
  -1  -3  -1  494.55   32.35 
  -1  -3  -1  475.62   32.68 
  -1  -3  -1  524.14   34.34 
   1  -3   1  483.25   32.19 
  -1  -3  -1  485.56   32.32 
  -1  -3  -1  494.88   32.38 
  -1  -3  -1  492.66   32.62 
  -1  -3  -1  516.00   32.43 
  -1  -3  -1  484.08   32.15 
   1  -3   1  486.10   32.07 
   1  -3   1  476.12   32.18 
   1  -3   1  501.68   32.28 
   1  -3   1  540.26   33.41 
   1  -3   1  548.18   32.80 
   1  -3   1  492.45   32.81 
   1  -3   1  420.00   33.33 
  -1  -3  -1  479.23   32.38 
  -1  -3  -1  480.47   32.54 
  -1  -3  -1  479.28   32.47 
   1  -3   1  498.18   33.04 
  -1  -3  -1  504.80   32.44 
  -1  -3  -1  491.54   32.28 
   1  -3   1  492.20   32.07 
   1  -3   1  519.97   32.30 
  -1  -3  -1  495.40   32.87 
  -1  -3  -1  498.96   32.23 
   1   3   1  507.87   32.59 
  -1   3  -1  468.00   32.22 
  -1   3  -1  513.73   32.35 
  -1   3  -1  498.52   32.81 
   1   3   1  512.99   32.87 
   1   3   1  483.27   31.85 
   1   3   1  474.11   32.26 
  -1   3  -1  480.85   31.97 
  -1   3  -1  486.70   32.04 
  -1   3  -1  453.08   32.86 
  -1   3  -1  492.39   32.12 
   1   3   1  509.67   33.06 
  -1   3  -1  489.65   32.24 
   1   3   1  494.54   32.16 
  -1   3  -1  413.91   32.47 
   1   3   1  542.53   32.35 
   1   3   1  522.92   32.38 
   1   3   1  498.31   32.44 
   1   3   1  487.22   32.30 
   1   3   1  503.10   32.43 
   1   3   1  467.59   31.94 
  -1   3  -1  451.05   32.18 
   1   3   1  473.36   32.29 
   1   3   1  533.52   32.50 
   1   3   1  467.54   31.98 
  -1   3  -1  459.01   32.19 
   1   3   1  487.66   32.40 
  -1   3  -1  473.12   32.17 
   1   3   1  503.55   32.40 
   1   3   1  518.92   32.97 
  -1   3  -1  397.83   32.86 
  -1   3  -1  487.83   32.08 
   1   3   1  506.18   32.23 
  -2  -3  -1   93.17    6.81 
  -2  -3  -1   77.71    5.95 
  -2  -3  -1   91.79    6.47 
  -2  -3  -1   82.94    6.52 
   2  -3   1   86.35    6.87 
   2  -3   1   80.12    6.39 
  -2  -3  -1   87.00    6.27 
   2  -3   1   85.52    6.44 
   2  -3   1   87.80    6.89 
  -2  -3  -1   86.48    6.62 
   2  -3   1   91.55    6.83 
  -2  -3  -1   86.01    6.48 
   2  -3   1   82.14    6.17 
   2  -3   1   88.59    6.80 
  -2  -3  -1   86.70    6.41 
  -2  -3  -1   95.12    6.70 
   2  -3   1   92.79    7.16 
  -2  -3  -1   88.88    6.44 
   2  -3   1   86.47    7.36 
   2  -3   1   85.52    6.45 
  -2  -3  -1   84.71    6.49 
   2  -3   1   86.66    6.57 
   2  -3   1   89.13    6.87 
  -2  -3  -1   87.66    6.50 
   2  -3   1   85.79    6.38 
   2  -3   1   80.59    6.26 
  -2   3  -1   81.15    7.51 
   2   3   1   91.55    6.48 
   2   3   1   90.09    6.65 
   2   3   1   92.60    6.74 
  -2   3  -1   89.20    7.27 
   2   3   1   78.61    5.85 
  -2   3  -1   81.91    7.05 
   2   3   1   81.62    6.38 
   2   3   1   90.33    6.66 
   2   3   1   81.21    5.83 
  -2   3  -1   85.94    6.54 
   2   3   1   93.38    6.51 
   2   3   1   89.87    6.40 
  -2   3  -1   81.75    6.33 
   2   3   1   94.57    6.35 
   2   3   1   79.20    5.94 
  -2   3  -1   80.22    6.76 
   2   3   1   97.73    6.58 
   2   3   1   89.94    6.38 
   2   3   1   85.01    7.09 
  -2   3  -1   90.58    7.63 
  -2   3  -1   86.93    6.52 
  -2   3  -1   83.30    6.47 
   2   3   1   90.75    6.72 
  -2   3  -1   88.35    6.41 
   2   3   1   85.27    6.77 
  -2   3  -1   90.38    6.56 
   2   3   1   87.45    6.25 
   3  -3   1  346.21   23.26 
  -3  -3  -1  350.29   23.38 
   3  -3   1  342.19   23.27 
   3  -3   1  331.10   23.06 
  -3  -3  -1  343.99   23.23 
  -3  -3  -1  333.78   23.05 
   3  -3   1  350.26   22.77 
  -3  -3  -1  362.43   22.94 
  -3  -3  -1  320.37   22.65 
   3  -3   1  332.94   23.11 
   3  -3   1  324.14   23.76 
   3  -3   1  348.91   23.10 
  -3  -3  -1  347.57   23.36 
  -3  -3  -1  340.05   22.90 
   3  -3   1  349.23   23.52 
  -3  -3  -1  347.85   23.04 
   3  -3   1  324.93   23.08 
  -3  -3  -1  358.21   22.84 
   3  -3   1  346.59   23.22 
  -3  -3  -1  343.01   23.02 
   3  -3   1  328.56   23.09 
   3  -3   1  310.50   23.25 
  -3  -3  -1  331.49   23.16 
  -3  -3  -1  367.83   22.99 
   3   3   1  339.95   22.99 
   3   3   1  341.31   22.58 
   3   3   1  349.51   22.68 
  -3   3  -1  354.87   23.81 
  -3   3  -1  363.26   23.90 
   3   3   1  323.11   23.02 
   3   3   1  337.81   23.44 
   3   3   1  361.70   22.96 
   3   3   1  359.81   23.13 
  -3   3  -1  340.99   23.39 
  -3   3  -1  354.91   23.24 
  -3   3  -1  330.30   23.59 
  -3   3  -1  347.30   23.17 
   3   3   1  346.69   23.26 
  -3   3  -1  360.20   23.06 
   3   3   1  366.29   23.28 
   3   3   1  364.80   22.87 
   3   3   1  347.11   23.08 
  -3   3  -1  337.75   22.64 
  -3   3  -1  357.53   23.42 
   3   3   1  354.86   23.13 
   3   3   1  331.78   22.54 
  -3   3  -1  331.28   23.80 
   3   3   1  350.73   22.93 
  -3   3  -1  342.55   23.09 
   3   3   1  341.07   23.12 
   3   3   1  372.83   22.98 
  -4  -3  -1   30.69    3.62 
  -4  -3  -1   30.67    3.59 
  -4  -3  -1   39.05    4.09 
   4  -3   1   33.90    3.56 
   4  -3   1   24.94    3.58 
  -4  -3  -1   38.10    3.57 
  -4  -3  -1   29.04    2.47 
  -4  -3  -1   28.34    2.69 
  -4  -3  -1   31.61    2.83 
   4  -3   1   29.45    3.41 
   4  -3   1   31.29    4.34 
  -4  -3  -1   30.57    3.81 
   4  -3   1   30.58    3.57 
  -4  -3  -1   33.81    3.67 
   4  -3   1   31.06    3.33 
  -4  -3  -1   30.90    2.78 
  -4  -3  -1   37.08    3.61 
   4  -3   1   32.32    3.41 
   4  -3   1   30.99    3.63 
  -4  -3  -1   30.94    3.37 
   4  -3   1   35.20    3.74 
   4  -3   1   30.53    3.80 
  -4  -3  -1   31.19    3.13 
   4  -3   1   33.28    2.77 
   4  -3   1   33.43    3.55 
   4   3   1   29.32    2.85 
  -4   3  -1   31.24    3.42 
   4   3   1   28.62    2.76 
  -4   3  -1   22.92    3.44 
  -4   3  -1   28.85    3.23 
  -4   3  -1   33.05    3.73 
  -4   3  -1   30.00    2.74 
   4   3   1   35.38    3.52 
   4   3   1   31.79    2.99 
  -4   3  -1   34.04    4.13 
  -4   3  -1   31.92    3.13 
   4   3   1   36.47    3.63 
   4   3   1   29.21    3.03 
  -4   3  -1   29.00    2.73 
   4   3   1   37.22    3.42 
  -4   3  -1   36.33    4.49 
   4   3   1   32.02    3.62 
   4   3   1   37.93    3.24 
   4   3   1   32.33    2.34 
  -4   3  -1   28.73    4.12 
   4   3   1   34.69    3.74 
   4   3   1   30.68    3.45 
   4   3   1   36.14    4.19 
   4   3   1   35.20    3.74 
  -4   3  -1   33.87    3.78 
  -4   3  -1   29.20    4.17 
   4   3   1   35.02    3.47 
  -4   3  -1   28.89    3.47 
  -5  -3  -1   19.58    2.76 
   5  -3   1   17.51    2.27 
   5  -3   1   14.12    2.43 
  -5  -3  -1   18.19    1.88 
   5  -3   1   17.01    2.85 
  -5  -3  -1   19.33    2.30 
  -5  -3  -1   19.79    3.28 
  -5  -3  -1   13.38    2.71 
   5  -3   1   17.81    3.09 
   5  -3   1   18.53    2.70 
  -5  -3  -1   17.75    2.74 
   5  -3   1   20.56    2.94 
  -5  -3  -1   17.67    2.64 
   5  -3   1   18.60    3.09 
   5  -3   1   20.25    3.97 
   5  -3   1   19.80    2.92 
   5  -3   1   16.09    2.68 
  -5  -3  -1   18.30    2.86 
   5  -3   1   14.29    2.70 
  -5  -3  -1   19.41    2.91 
  -5  -3  -1   24.08    3.33 
   5  -3   1   16.32    2.89 
  -5  -3  -1   22.58    2.49 
  -5  -3  -1   22.01    3.27 
  -5   3  -1   21.07    3.00 
   5   3   1   21.59    2.64 
  -5   3  -1   19.60    2.37 
   5   3   1   18.87    2.77 
   5   3   1   23.91    3.12 
   5   3   1   20.19    2.47 
  -5   3  -1   17.00    3.23 
  -5   3  -1   17.40    2.58 
   5   3   1   18.36    2.84 
   5   3   1   24.23    3.05 
  -5   3  -1   14.97    3.33 
  -5   3  -1   19.65    3.22 
  -5   3  -1   17.08    3.00 
   5   3   1   22.73    2.82 
  -5   3  -1   20.03    3.25 
   5   3   1   19.47    2.57 
  -5   3  -1   18.44    2.85 
   5   3   1   20.09    2.98 
  -5   3  -1   19.42    3.69 
  -5   3  -1   23.08    3.79 
   5   3   1   19.51    2.74 
  -5   3  -1   14.81    2.71 
   5   3   1   18.94    2.09 
  -5   3  -1   21.50    3.13 
   5   3   1   23.10    2.82 
   6  -3   1   -1.06    1.79 
   6  -3   1    4.33    2.22 
  -6  -3  -1    3.73    1.87 
   6  -3   1    2.81    1.75 
   6  -3   1    1.29    1.79 
   6  -3   1    5.84    3.28 
   6  -3   1    1.48    1.56 
  -6  -3  -1    1.21    1.04 
   6  -3   1    3.43    1.82 
  -6  -3  -1    4.50    2.11 
  -6  -3  -1    2.56    1.89 
   6  -3   1    3.71    1.56 
  -6  -3  -1    3.20    2.29 
   6  -3   1    5.63    2.25 
  -6  -3  -1    3.44    1.42 
   6  -3   1    2.47    2.03 
  -6  -3  -1    3.33    2.04 
  -6  -3  -1    4.80    2.31 
   6  -3   1    4.73    2.11 
   6  -3   1    1.95    1.65 
  -6  -3  -1    2.17    1.38 
  -6  -3  -1    1.51    2.13 
  -6  -3  -1    4.19    1.66 
  -6  -3  -1    5.57    2.25 
   6   3   1    4.97    2.00 
   6   3   1    6.41    2.14 
   6   3   1    3.62    1.72 
   6   3   1    3.04    1.80 
  -6   3  -1   -2.08    2.12 
   6   3   1    3.34    1.94 
  -6   3  -1    0.01    1.75 
  -6   3  -1    1.20    2.58 
  -6   3  -1    0.87    2.39 
   6   3   1    3.59    1.78 
  -6   3  -1    2.62    2.26 
  -6   3  -1    3.71    2.06 
  -6   3  -1    0.71    2.00 
   6   3   1    2.56    1.51 
  -6   3  -1    4.77    2.11 
  -6   3  -1    0.38    1.62 
   6   3   1    4.73    2.08 
  -6   3  -1    0.12    1.76 
  -6   3  -1    1.67    2.34 
  -6   3  -1    2.11    1.43 
   6   3   1    3.57    1.75 
  -6   3  -1    0.95    2.26 
   6   3   1    4.00    1.91 
   7  -3   1    2.09    1.66 
  -7  -3  -1    5.12    2.56 
   7  -3   1    4.55    2.25 
  -7  -3  -1    6.91    2.71 
   7  -3   1    6.38    2.19 
   7  -3   1    5.29    3.38 
  -7  -3  -1    7.01    2.41 
   7  -3   1    5.46    2.40 
  -7  -3  -1    5.72    2.27 
   7  -3   1    9.99    3.01 
  -7  -3  -1    4.47    1.61 
  -7  -3  -1    7.66    2.83 
  -7  -3  -1    1.03    2.32 
   7  -3   1    6.54    2.38 
  -7  -3  -1    3.01    2.36 
  -7  -3  -1    3.97    2.21 
  -7  -3  -1    4.88    1.94 
   7  -3   1    2.86    2.31 
  -7  -3  -1    3.42    1.62 
   7  -3   1    6.94    2.59 
   7  -3   1    6.86    2.35 
   7  -3   1    3.42    2.14 
  -7   3  -1    5.65    2.42 
   7   3   1    3.96    2.06 
   7   3   1    4.30    2.39 
   7   3   1    5.81    2.27 
  -7   3  -1    7.37    2.21 
  -7   3  -1    6.43    3.52 
  -7   3  -1    6.01    3.19 
  -7   3  -1    5.48    2.94 
   7   3   1    5.29    2.16 
   7   3   1    4.38    2.13 
  -7   3  -1   -1.75    2.52 
   7   3   1    3.98    2.07 
   7   3   1    3.38    2.26 
  -7   3  -1    4.25    2.85 
  -7   3  -1    6.26    1.84 
   7   3   1    5.04    2.23 
  -7   3  -1    4.80    2.78 
  -7   3  -1    5.10    2.46 
  -7   3  -1    4.02    2.91 
  -7   3  -1    5.69    2.48 
   7   3   1    7.86    2.54 
  -7   3  -1    8.55    2.73 
  -8  -3  -1   -1.33    2.09 
  -8  -3  -1    1.93    1.89 
   8  -3   1   -1.85    2.20 
   8  -3   1   -0.56    1.81 
   8  -3   1    0.37    2.13 
  -8  -3  -1    6.39    3.06 
  -8  -3  -1    0.16    2.17 
   8  -3   1    1.00    2.20 
  -8  -3  -1    0.98    1.80 
  -8  -3  -1    0.47    2.27 
  -8  -3  -1   -3.93    1.64 
   8  -3   1    4.42    3.59 
   8  -3   1    0.83    2.08 
  -8  -3  -1    2.01    2.32 
  -8  -3  -1    0.80    2.43 
   8  -3   1   -0.57    2.20 
   8  -3   1   -0.15    2.41 
  -8  -3  -1   -1.70    2.49 
   8  -3   1   -0.17    2.60 
   8  -3   1   -1.14    2.16 
   8   3   1    2.95    1.98 
  -8   3  -1    1.65    2.58 
  -8   3  -1   -1.47    2.37 
   8   3   1    0.18    1.72 
  -8   3  -1    1.30    2.74 
   8   3   1   -0.01    2.01 
   8   3   1   -1.59    1.99 
  -8   3  -1    0.95    2.36 
  -8   3  -1    0.64    2.73 
   8   3   1    1.69    2.30 
  -8   3  -1   -1.05    2.30 
   8   3   1    0.61    1.99 
   8   3   1    1.33    2.06 
   8   3   1   -2.00    2.90 
  -8   3  -1    1.25    2.13 
  -8   3  -1    0.06    3.02 
   8   3   1   -2.89    2.33 
  -8   3  -1    0.41    2.89 
  -8   3  -1   -0.56    3.14 
  -8   3  -1    1.87    2.79 
   9  -3   1   -0.92    2.49 
   9  -3   1   -1.47    2.18 
  -9  -3  -1    0.88    2.71 
  -9  -3  -1   -0.99    2.33 
   9  -3   1   -1.89    2.27 
  -9  -3  -1   -1.27    2.67 
  -9  -3  -1    3.21    3.17 
   9  -3   1    2.19    2.46 
   9  -3   1    0.81    2.35 
   9  -3   1   -1.02    2.36 
  -9  -3  -1   -1.49    2.17 
   9  -3   1   -2.64    2.12 
  -9  -3  -1   -0.26    2.87 
  -9  -3  -1   -2.38    2.25 
   9  -3   1   -0.77    2.26 
  -9  -3  -1    1.21    2.65 
   9  -3   1    1.00    3.84 
  -9   3  -1    2.64    3.25 
  -9   3  -1    0.67    2.70 
  -9   3  -1    3.03    3.78 
  -9   3  -1   -2.08    2.95 
   9   3   1   -3.88    2.32 
  -9   3  -1    0.07    2.60 
  -9   3  -1    2.61    3.38 
   9   3   1    3.68    2.73 
   9   3   1    0.52    2.32 
  -9   3  -1   -4.31    2.65 
   9   3   1   -0.09    1.99 
   9   3   1    7.67    2.95 
  -9   3  -1    3.96    2.69 
   9   3   1    0.35    1.94 
  -9   3  -1    3.48    3.48 
   9   3   1   -2.00    3.39 
  -9   3  -1   -1.97    2.60 
   9   3   1    0.98    2.55 
  -9   3  -1   -1.48    3.18 
   9  -4  -1   -0.98    2.12 
   9  -4  -1    1.65    2.57 
   9  -4  -1    6.47    3.05 
  -9  -4   1    1.97    3.07 
   9  -4  -1    0.27    2.67 
  -9  -4   1   -0.42    2.40 
   9  -4  -1    0.20    3.67 
  -9  -4   1    0.88    2.87 
   9  -4  -1    3.14    3.21 
   9  -4  -1    1.75    2.86 
  -9  -4   1    5.81    3.25 
  -9  -4   1   -2.17    2.33 
  -9  -4   1    8.09    3.48 
   9  -4  -1    0.01    2.65 
   9  -4  -1    3.73    2.73 
  -9  -4   1    0.77    2.62 
   9  -4  -1    0.34    2.66 
   9   4  -1    2.20    2.14 
  -9   4   1    7.05    4.45 
  -9   4   1    3.85    2.77 
  -9   4   1   -1.26    3.36 
  -9   4   1    2.54    3.78 
   9   4  -1    2.20    3.58 
  -9   4   1    5.06    3.80 
  -9   4   1    2.10    2.97 
  -9   4   1    0.15    3.52 
   9   4  -1    1.22    1.94 
  -9   4   1    2.04    2.87 
  -9   4   1   -1.95    3.71 
  -9   4   1    2.72    3.33 
   9   4  -1    1.65    3.06 
   9   4  -1    4.44    2.52 
   9   4  -1    1.76    2.37 
   9   4  -1    1.87    2.96 
  -8  -4   1   38.11    5.31 
   8  -4  -1   23.61    4.41 
  -8  -4   1   36.11    4.21 
   8  -4  -1   39.41    5.01 
   8  -4  -1   36.65    5.72 
   8  -4  -1   33.18    6.18 
   8  -4  -1   27.23    4.37 
  -8  -4   1   42.83    4.90 
  -8  -4   1   36.43    5.65 
   8  -4  -1   30.99    5.88 
  -8  -4   1   42.19    5.34 
  -8  -4   1   41.49    5.51 
   8  -4  -1   40.92    5.72 
  -8  -4   1   30.34    5.22 
   8  -4  -1   38.60    5.49 
  -8  -4   1   37.71    4.85 
  -8  -4   1   29.72    4.90 
   8  -4  -1   38.92    5.24 
   8  -4  -1   42.12    5.23 
   8  -4  -1   29.75    4.64 
  -8   4   1   34.99    5.15 
   8   4  -1   34.89    4.80 
  -8   4   1   30.89    5.24 
  -8   4   1   42.08    6.80 
   8   4  -1   35.63    5.84 
  -8   4   1   27.13    5.26 
  -8   4   1   33.63    4.99 
  -8   4   1   35.90    5.54 
   8   4  -1   37.48    5.10 
  -8   4   1   35.16    5.43 
   8   4  -1   35.58    5.43 
  -8   4   1   24.78    5.31 
   8   4  -1   28.48    4.88 
  -8   4   1   34.72    6.74 
   8   4  -1   33.84    4.42 
   8   4  -1   26.99    4.41 
  -8   4   1   33.99    5.95 
   8   4  -1   30.48    4.57 
   7  -4  -1    3.52    2.26 
  -7  -4   1   -1.36    2.06 
  -7  -4   1    3.46    2.31 
  -7  -4   1   -1.21    1.69 
  -7  -4   1    1.96    2.62 
   7  -4  -1    2.06    2.30 
   7  -4  -1    2.41    1.99 
   7  -4  -1    2.11    2.06 
   7  -4  -1    1.84    2.33 
   7  -4  -1   -2.88    2.07 
   7  -4  -1    1.67    2.02 
  -7  -4   1   -1.41    2.03 
   7  -4  -1    0.68    2.22 
   7  -4  -1    0.40    1.78 
   7  -4  -1    3.65    3.04 
  -7  -4   1    1.00    2.07 
  -7  -4   1    2.53    1.90 
   7  -4  -1    0.46    1.69 
   7  -4  -1    1.01    1.90 
  -7  -4   1   -1.29    1.41 
  -7  -4   1   -1.41    2.06 
  -7   4   1   -1.48    2.73 
   7   4  -1    0.20    1.75 
  -7   4   1    2.61    2.91 
   7   4  -1   -0.47    2.58 
  -7   4   1    2.58    2.25 
  -7   4   1    1.71    1.90 
   7   4  -1   -0.01    1.56 
   7   4  -1    0.27    1.43 
   7   4  -1    0.19    2.16 
   7   4  -1    1.96    1.68 
  -7   4   1    1.59    2.32 
   7   4  -1    0.76    2.00 
  -7   4   1   -3.01    2.88 
  -7   4   1    0.78    2.06 
   7   4  -1   -1.03    1.76 
   7   4  -1    2.48    2.24 
   7   4  -1    1.56    1.97 
  -7   4   1    3.47    2.79 
   7   4  -1   -3.25    1.97 
  -7   4   1   -1.19    2.32 
  -7   4   1    1.85    2.96 
   6  -4  -1   40.54    4.83 
   6  -4  -1   46.14    4.90 
  -6  -4   1   42.54    5.31 
   6  -4  -1   34.47    4.63 
   6  -4  -1   38.44    4.73 
   6  -4  -1   33.27    4.44 
  -6  -4   1   36.00    4.26 
  -6  -4   1   44.07    3.68 
   6  -4  -1   38.45    5.11 
   6  -4  -1   40.92    4.07 
  -6  -4   1   44.98    4.62 
  -6  -4   1   38.83    4.93 
   6  -4  -1   34.35    4.94 
  -6  -4   1   34.28    3.32 
  -6  -4   1   41.16    4.82 
   6  -4  -1   38.36    5.29 
  -6  -4   1   39.13    5.28 
  -6  -4   1   40.97    4.32 
   6  -4  -1   40.95    5.61 
   6  -4  -1   38.88    4.81 
   6  -4  -1   37.15    4.81 
  -6  -4   1   38.51    4.84 
  -6  -4   1   37.16    4.74 
  -6   4   1   34.99    4.23 
  -6   4   1   35.37    5.03 
   6   4  -1   42.81    3.79 
  -6   4   1   40.38    5.50 
  -6   4   1   36.52    4.65 
  -6   4   1   35.28    5.45 
   6   4  -1   45.12    4.84 
  -6   4   1   35.80    6.11 
   6   4  -1   41.27    4.81 
   6   4  -1   41.23    4.45 
   6   4  -1   42.12    4.65 
  -6   4   1   41.12    5.17 
   6   4  -1   38.96    4.96 
  -6   4   1   35.65    5.04 
  -6   4   1   31.98    5.71 
   6   4  -1   43.64    4.24 
   6   4  -1   29.67    4.18 
   6   4  -1   40.09    4.30 
  -6   4   1   33.15    4.80 
   6   4  -1   40.52    5.17 
   5  -4  -1    4.21    2.08 
  -5  -4   1    5.12    1.48 
  -5  -4   1    4.61    2.12 
   5  -4  -1    9.40    2.38 
   5  -4  -1    6.29    2.29 
   5  -4  -1    3.57    2.12 
  -5  -4   1    4.72    1.90 
   5  -4  -1    5.75    1.96 
  -5  -4   1    4.75    1.90 
  -5  -4   1    4.24    1.02 
  -5  -4   1    6.29    1.83 
   5  -4  -1    5.04    2.28 
  -5  -4   1    3.56    2.03 
   5  -4  -1    6.56    2.26 
  -5  -4   1    1.78    1.46 
   5  -4  -1   -0.19    2.37 
  -5  -4   1    4.05    2.21 
   5  -4  -1    0.22    1.76 
   5  -4  -1    5.03    2.06 
  -5  -4   1    4.40    1.29 
   5  -4  -1    4.95    2.03 
   5   4  -1    3.14    1.31 
  -5   4   1    2.16    2.17 
  -5   4   1    4.80    2.40 
  -5   4   1    3.18    2.54 
  -5   4   1    9.72    2.61 
   5   4  -1    4.51    1.50 
  -5   4   1    4.99    2.91 
   5   4  -1    2.90    1.64 
  -5   4   1    2.99    1.86 
   5   4  -1    5.15    1.40 
   5   4  -1    6.39    2.04 
   5   4  -1    5.18    1.65 
  -5   4   1   -0.03    2.16 
   5   4  -1    5.02    2.18 
  -5   4   1    6.31    2.98 
   5   4  -1    7.18    2.37 
   5   4  -1    8.80    2.05 
   5   4  -1    4.81    1.57 
  -5   4   1    6.18    1.93 
   5   4  -1    6.92    1.85 
  -5   4   1    4.57    2.12 
   5   4  -1    4.50    2.02 
   4  -4  -1   88.76    7.47 
  -4  -4   1   99.60    7.55 
  -4  -4   1   98.82    7.23 
   4  -4  -1   87.49    7.63 
  -4  -4   1   93.53    7.03 
  -4  -4   1   75.86    7.52 
   4  -4  -1   95.16    7.59 
  -4  -4   1   99.85    7.85 
  -4  -4   1   94.78    7.08 
   4  -4  -1   98.03    7.75 
   4  -4  -1   82.16    7.90 
   4  -4  -1   94.86    8.00 
  -4  -4   1   90.23    7.04 
  -4  -4   1  100.30    7.71 
  -4  -4   1   86.44    6.44 
   4  -4  -1   95.01    7.71 
  -4  -4   1   96.96    7.15 
  -4  -4   1   88.25    6.98 
   4  -4  -1   88.39    7.90 
   4  -4  -1   95.10    7.58 
   4  -4  -1  100.26    7.59 
  -4   4   1   84.55    8.48 
   4   4  -1  102.97    7.45 
   4   4  -1   93.70    7.63 
   4   4  -1   96.96    6.57 
  -4   4   1   95.20    7.32 
   4   4  -1  103.62    7.50 
  -4   4   1   89.82    7.78 
   4   4  -1   86.99    7.27 
   4   4  -1  102.15    7.81 
  -4   4   1   98.22    7.43 
   4   4  -1   90.03    7.37 
  -4   4   1   79.97    8.01 
  -4   4   1   92.50    8.66 
  -4   4   1   94.36    7.44 
  -4   4   1   98.24    7.69 
  -4   4   1   95.01    7.69 
  -4   4   1   94.84    8.34 
   4   4  -1  103.18    6.93 
   4   4  -1   96.59    7.29 
   4   4  -1   98.79    7.28 
   4   4  -1   96.05    7.38 
   4   4  -1   96.81    6.90 
  -4   4   1   96.15    8.11 
   4   4  -1   90.02    6.78 
  -3  -4   1    3.83    1.70 
   3  -4  -1    6.21    2.18 
   3  -4  -1    5.49    1.62 
   3  -4  -1    2.59    1.97 
  -3  -4   1    1.76    1.42 
   3  -4  -1    1.90    1.71 
   3  -4  -1    1.23    1.74 
   3  -4  -1    3.46    1.68 
  -3  -4   1    2.43    1.23 
   3  -4  -1    2.36    1.57 
   3  -4  -1    3.73    1.13 
   3  -4  -1    4.07    1.73 
  -3  -4   1    2.06    1.33 
   3  -4  -1    5.51    2.23 
  -3  -4   1    1.70    1.51 
  -3  -4   1    2.60    1.20 
  -3  -4   1    2.48    1.00 
  -3  -4   1    3.90    1.42 
  -3  -4   1    3.59    1.25 
  -3  -4   1    4.86    1.61 
  -3   4   1    1.34    1.50 
   3   4  -1    3.78    0.95 
  -3   4   1    1.55    1.86 
  -3   4   1    3.56    1.64 
   3   4  -1    3.46    0.90 
   3   4  -1    2.12    1.09 
  -3   4   1   -0.22    1.87 
  -3   4   1    2.80    2.50 
  -3   4   1    4.23    1.80 
   3   4  -1    2.03    1.43 
   3   4  -1    3.75    1.60 
   3   4  -1    2.00    1.31 
  -3   4   1    1.19    2.07 
   3   4  -1    4.19    1.41 
   3   4  -1    1.62    1.26 
   3   4  -1    3.60    1.80 
   3   4  -1    2.96    1.61 
  -3   4   1   -0.01    1.53 
   3   4  -1    4.03    1.10 
   3   4  -1    3.06    1.63 
  -3   4   1    5.53    2.33 
   3   4  -1    1.75    1.27 
   3   4  -1    2.34    1.19 
  -3   4   1    3.21    1.56 
   3   4  -1    1.89    0.90 
  -2  -4   1   62.65    5.06 
  -2  -4   1   57.03    5.25 
   2  -4  -1   63.40    5.13 
  -2  -4   1   58.37    4.52 
  -2  -4   1   64.07    5.08 
   2  -4  -1   56.63    5.18 
  -2  -4   1   62.51    4.43 
  -2  -4   1   54.00    4.46 
   2  -4  -1   59.04    4.86 
  -2  -4   1   53.16    4.85 
   2  -4  -1   51.38    6.43 
   2  -4  -1   60.60    5.14 
  -2  -4   1   65.42    4.79 
  -2  -4   1   56.57    5.06 
   2  -4  -1   55.80    5.22 
   2  -4  -1   68.16    5.93 
   2  -4  -1   66.39    6.79 
  -2  -4   1   56.87    5.25 
  -2   4   1   55.45    4.94 
  -2   4   1   60.35    6.05 
  -2   4   1   59.63    5.08 
  -2   4   1   46.44    6.24 
   2   4  -1   61.77    5.37 
   2   4  -1   59.15    5.55 
   2   4  -1   65.77    4.97 
   2   4  -1   57.11    4.35 
   2   4  -1   71.76    5.19 
   2   4  -1   54.85    4.37 
   2   4  -1   54.81    4.37 
  -2   4   1   56.71    5.16 
   2   4  -1   65.65    4.59 
   2   4  -1   60.00    5.06 
   2   4  -1   60.13    4.57 
  -2   4   1   46.58    5.85 
  -2   4   1   52.28    4.59 
  -2   4   1   32.27    5.85 
  -2   4   1   57.46    4.40 
  -2   4   1   53.16    6.25 
   2   4  -1   62.18    4.82 
   2   4  -1   61.90    5.06 
  -2   4   1   65.62    5.20 
  -2   4   1   49.71    8.52 
  -2   4   1   55.24    4.89 
   2   4  -1   57.75    4.98 
  -2   4   1   53.31    5.13 
  -2   4   1   50.32    6.78 
   2   4  -1   62.42    4.79 
   1  -4  -1    1.86    2.34 
  -1  -4   1    0.61    1.27 
  -1  -4   1   -1.47    1.61 
  -1  -4   1    0.74    1.23 
   1  -4  -1    2.38    3.07 
   1  -4  -1    0.21    1.41 
   1  -4  -1    0.15    1.29 
   1  -4  -1   -1.72    3.20 
  -1  -4   1    0.33    1.36 
  -1  -4   1    0.15    1.28 
   1  -4  -1    1.39    2.56 
   1  -4  -1    0.37    1.49 
   1  -4  -1    2.09    1.55 
   1  -4  -1    0.02    2.27 
   1  -4  -1    0.47    0.88 
   1  -4  -1    0.66    1.34 
  -1  -4   1   -0.03    2.27 
   1  -4  -1    1.10    1.86 
  -1  -4   1   -1.50    1.77 
  -1  -4   1   -0.17    1.65 
  -1  -4   1    1.96    1.33 
   1  -4  -1    0.07    2.27 
   1   4  -1    1.18    1.44 
   1   4  -1    1.39    2.13 
  -1   4   1   -0.84    1.40 
  -1   4   1    1.23    3.43 
  -1   4   1   -0.64    2.35 
   1   4  -1   -1.31    1.20 
   1   4  -1    2.19    1.37 
  -1   4   1    0.28    1.20 
   1   4  -1   -1.73    1.41 
  -1   4   1   -1.29    2.10 
   1   4  -1   -0.45    1.82 
  -1   4   1    0.42    2.31 
   1   4  -1   -0.67    1.64 
  -1   4   1    0.98    2.08 
  -1   4   1    1.12    2.35 
   1   4  -1   -0.39    0.93 
   1   4  -1    0.53    0.85 
   1   4  -1   -0.29    0.91 
  -1   4   1   -0.93    1.05 
   1   4  -1    1.29    1.42 
   1   4  -1    2.24    1.95 
  -1   4   1    0.38    1.43 
   1   4  -1    0.14    1.31 
   1   4  -1   -1.13    1.35 
   1   4  -1   -2.19    1.44 
   1   4  -1   -0.01    0.60 
   0  -4  -1   35.89    5.99 
   0  -4  -1   70.05    5.67 
   0  -4  -1   70.17    5.52 
   0  -4  -1   73.78    5.67 
   0  -4  -1   65.76    5.40 
   0  -4  -1   42.44    6.54 
   0  -4  -1   64.47    6.88 
   0  -4  -1   55.71    6.53 
   0  -4   1   69.17    5.21 
   0  -4  -1   53.24    5.85 
   0  -4  -1   53.06    5.69 
   0  -4   1   56.32    6.53 
   0  -4  -1   67.97    5.40 
   0  -4   1   65.98    5.24 
   0  -4   1   54.21    5.44 
   0  -4   1   65.30    5.23 
   0  -4   1   43.08    6.40 
   0  -4   1   62.26    4.63 
   0  -4   1   67.00    6.94 
   0  -4   1   64.11    6.52 
   0   4  -1   64.15    4.57 
   0   4  -1   69.20    7.48 
   0   4   1   58.88    5.50 
   0   4   1   66.58    5.46 
   0   4   1   57.12    7.73 
   0   4  -1   66.44    4.96 
   0   4   1   67.01    5.60 
   0   4  -1   53.52    7.01 
   0   4  -1   67.92    5.32 
   0   4  -1   61.96    5.29 
   0   4   1   65.03    8.37 
   0   4   1   66.03    7.32 
   0   4   1   64.53    5.41 
   0   4   1   55.74    6.41 
   0   4  -1   65.63    5.62 
   0   4   1   65.12    4.82 
   0   4  -1   71.19    5.71 
   0   4  -1   60.99    4.88 
   0   4   1   59.18    5.10 
   0   4   1   67.48    7.82 
   0   4  -1   67.05    4.69 
   0   4  -1   69.12    5.50 
   0   4  -1   60.72    6.97 
  -1  -4  -1    7.98    2.14 
  -1  -4  -1   10.45    2.42 
  -1  -4  -1   10.34    2.04 
   1  -4   1    9.20    3.55 
   1  -4   1    9.86    2.83 
   1  -4   1   10.88    4.47 
   1  -4   1    7.15    3.02 
  -1  -4  -1    9.06    1.92 
  -1  -4  -1   13.42    2.45 
  -1  -4  -1    6.71    2.40 
   1  -4   1    9.74    1.88 
   1  -4   1   10.88    2.04 
  -1  -4  -1   12.96    2.16 
   1  -4   1   10.72    4.00 
  -1  -4  -1    9.37    2.10 
   1  -4   1   12.61    2.20 
   1   4   1   10.68    2.25 
  -1   4  -1   10.58    1.79 
  -1   4  -1    6.91    3.20 
   1   4   1   10.25    1.89 
   1   4   1   10.67    2.32 
  -1   4  -1   11.69    2.17 
  -1   4  -1   11.77    2.96 
   1   4   1    4.49    1.93 
  -1   4  -1   12.61    1.64 
   1   4   1    6.99    1.51 
   1   4   1    9.13    1.69 
  -1   4  -1   11.28    3.92 
   1   4   1   10.08    1.95 
   1   4   1   14.73    2.61 
  -1   4  -1   12.25    3.45 
  -1   4  -1    7.33    2.65 
   1   4   1    9.44    1.36 
   1   4   1   11.53    2.45 
   1   4   1   13.81    3.49 
  -1   4  -1    8.98    1.85 
   1   4   1    9.91    3.00 
   1   4   1    7.48    1.98 
  -1   4  -1    8.37    1.54 
  -1   4  -1   10.32    2.08 
   1   4   1   16.56    3.33 
   1   4   1   11.58    2.44 
   1   4   1   11.41    2.35 
  -1   4  -1    7.43    2.91 
   2  -4   1  194.46   13.88 
   2  -4   1  178.46   14.38 
   2  -4   1  196.99   13.33 
  -2  -4  -1  196.26   13.28 
  -2  -4  -1  185.48   13.33 
  -2  -4  -1  181.92   13.62 
  -2  -4  -1  199.82   13.55 
  -2  -4  -1  189.60   13.35 
  -2  -4  -1  200.04   13.44 
   2  -4   1  212.79   14.40 
   2  -4   1  193.55   13.39 
   2  -4   1  200.44   13.48 
  -2  -4  -1  202.68   13.53 
   2  -4   1  160.62   14.39 
   2  -4   1  196.48   13.02 
  -2  -4  -1  190.03   13.25 
  -2  -4  -1  201.86   13.12 
  -2   4  -1  162.34   14.09 
   2   4   1  183.88   12.54 
  -2   4  -1  197.45   13.27 
   2   4   1  204.42   13.60 
   2   4   1  199.81   14.25 
   2   4   1  182.79   12.50 
  -2   4  -1  157.81   13.80 
   2   4   1  192.20   13.51 
   2   4   1  197.45   13.66 
   2   4   1  192.56   13.50 
  -2   4  -1  194.72   13.11 
   2   4   1  199.16   13.14 
   2   4   1  202.38   13.60 
   2   4   1  177.10   12.59 
   2   4   1  201.32   13.32 
   2   4   1  192.29   13.45 
  -2   4  -1  190.66   13.71 
  -2   4  -1  186.93   14.52 
  -2   4  -1  184.22   13.37 
   2   4   1  182.79   12.70 
  -2   4  -1  190.57   13.34 
   2   4   1  196.46   13.21 
   2   4   1  203.69   13.38 
  -2   4  -1  146.67   14.55 
  -3  -4  -1    4.80    1.57 
  -3  -4  -1    2.81    1.40 
  -3  -4  -1    3.94    1.48 
  -3  -4  -1    4.12    0.95 
  -3  -4  -1    2.96    1.41 
   3  -4   1    2.59    1.82 
  -3  -4  -1    5.24    1.66 
  -3  -4  -1    2.58    1.30 
  -3  -4  -1    2.76    1.54 
  -3  -4  -1    1.51    1.49 
   3  -4   1    4.47    1.69 
   3  -4   1    2.87    1.14 
   3  -4   1    6.27    2.04 
   3  -4   1    1.53    1.29 
   3  -4   1    4.36    1.82 
   3  -4   1    6.88    1.65 
  -3  -4  -1    3.93    1.71 
   3  -4   1    3.36    1.77 
   3  -4   1    2.69    2.48 
   3  -4   1    2.31    1.44 
   3   4   1    5.69    1.61 
   3   4   1    0.12    1.17 
  -3   4  -1    2.57    1.48 
   3   4   1    4.76    1.76 
  -3   4  -1    5.01    1.94 
   3   4   1    5.06    1.31 
  -3   4  -1    5.02    2.43 
   3   4   1    5.52    1.44 
   3   4   1    3.76    1.69 
   3   4   1    3.19    1.03 
   3   4   1    1.48    0.85 
   3   4   1    3.11    1.30 
   3   4   1    6.76    2.30 
  -3   4  -1    2.68    2.54 
   3   4   1    2.79    1.67 
   3   4   1    3.95    1.55 
  -3   4  -1    2.20    1.56 
  -3   4  -1    2.83    1.41 
  -3   4  -1    3.46    2.37 
  -3   4  -1    1.31    1.59 
   3   4   1    3.54    1.75 
  -3   4  -1    4.99    1.60 
  -3   4  -1    6.97    2.19 
  -3   4  -1    0.42    1.31 
   3   4   1    4.61    1.65 
   3   4   1    3.82    1.41 
  -4  -4  -1   28.71    3.44 
   4  -4   1   19.74    2.94 
  -4  -4  -1   22.71    2.69 
  -4  -4  -1   18.21    3.10 
  -4  -4  -1   19.91    2.87 
   4  -4   1   27.48    3.22 
  -4  -4  -1   21.34    2.86 
  -4  -4  -1   19.29    2.17 
   4  -4   1   17.09    2.97 
   4  -4   1   27.99    3.19 
   4  -4   1   14.68    2.97 
   4  -4   1   17.99    3.16 
   4  -4   1   18.54    3.11 
  -4  -4  -1   22.35    3.14 
  -4  -4  -1   21.62    3.26 
   4  -4   1   18.62    3.99 
   4  -4   1   17.97    2.78 
  -4  -4  -1   30.87    3.17 
  -4  -4  -1   20.05    2.69 
  -4   4  -1   22.86    3.75 
   4   4   1   18.77    2.85 
   4   4   1   21.82    3.05 
   4   4   1   25.28    2.87 
   4   4   1   18.81    1.97 
   4   4   1   21.47    3.11 
   4   4   1   14.56    2.53 
   4   4   1   22.10    3.02 
  -4   4  -1   22.02    4.06 
  -4   4  -1   22.25    3.48 
   4   4   1   29.42    3.93 
   4   4   1   22.49    3.01 
   4   4   1   23.58    2.63 
   4   4   1   24.15    2.81 
  -4   4  -1   19.74    2.87 
   4   4   1   21.30    2.33 
  -4   4  -1   17.60    3.00 
  -4   4  -1   20.74    3.97 
  -4   4  -1   25.19    3.23 
   4   4   1   25.26    3.27 
  -4   4  -1   18.47    2.81 
   4   4   1   18.32    2.02 
  -4   4  -1   15.26    3.57 
  -5  -4  -1    4.37    1.89 
  -5  -4  -1    4.94    2.21 
   5  -4   1    1.78    1.77 
  -5  -4  -1    5.14    1.76 
   5  -4   1    4.96    2.17 
   5  -4   1    2.78    3.18 
  -5  -4  -1    4.71    1.82 
  -5  -4  -1    1.36    1.11 
   5  -4   1    5.83    1.99 
   5  -4   1    2.57    2.07 
   5  -4   1    3.40    1.84 
   5  -4   1    0.77    2.00 
  -5  -4  -1    3.89    1.78 
  -5  -4  -1    2.24    1.95 
  -5  -4  -1    3.25    1.44 
  -5  -4  -1    2.19    1.89 
  -5  -4  -1    3.43    1.95 
   5  -4   1    4.02    2.02 
   5  -4   1    3.34    1.67 
   5  -4   1    3.69    1.79 
  -5   4  -1    1.95    1.88 
   5   4   1    1.21    2.02 
   5   4   1    1.57    1.65 
   5   4   1    2.29    1.62 
   5   4   1    2.98    1.75 
  -5   4  -1    0.39    2.10 
   5   4   1    2.83    1.42 
  -5   4  -1    2.35    2.29 
   5   4   1    3.67    1.50 
   5   4   1    5.03    2.00 
  -5   4  -1    7.63    2.63 
   5   4   1    2.69    2.01 
  -5   4  -1    4.81    2.76 
   5   4   1    2.40    1.82 
  -5   4  -1    5.44    2.92 
  -5   4  -1    4.48    2.78 
  -5   4  -1    2.59    1.96 
   5   4   1    2.36    1.82 
   5   4   1    4.14    1.72 
  -5   4  -1    3.87    2.41 
  -5   4  -1    4.15    1.87 
  -5   4  -1    0.79    2.09 
   6  -4   1  186.65   14.47 
  -6  -4  -1  198.11   13.50 
   6  -4   1  191.00   14.30 
   6  -4   1  190.88   13.28 
  -6  -4  -1  204.20   14.37 
   6  -4   1  190.37   14.21 
  -6  -4  -1  184.80   13.99 
  -6  -4  -1  182.46   13.95 
  -6  -4  -1  180.98   13.90 
  -6  -4  -1  217.24   14.52 
  -6  -4  -1  197.33   14.81 
   6  -4   1  182.15   13.96 
   6  -4   1  197.12   14.01 
   6  -4   1  190.50   14.75 
  -6  -4  -1  191.07   14.19 
   6  -4   1  214.41   14.45 
   6  -4   1  179.51   14.07 
   6  -4   1  185.64   15.31 
  -6  -4  -1  205.59   14.50 
   6  -4   1  185.21   14.36 
  -6  -4  -1  191.07   14.64 
  -6   4  -1  183.38   14.62 
  -6   4  -1  197.80   15.46 
   6   4   1  189.27   14.20 
   6   4   1  199.49   14.14 
   6   4   1  193.51   14.14 
   6   4   1  200.88   13.91 
   6   4   1  186.09   14.53 
   6   4   1  205.39   14.31 
   6   4   1  191.57   13.53 
   6   4   1  203.08   13.65 
  -6   4  -1  175.57   14.42 
  -6   4  -1  208.84   15.19 
  -6   4  -1  190.16   15.39 
  -6   4  -1  200.67   14.02 
   6   4   1  182.88   14.34 
   6   4   1  197.83   13.81 
  -6   4  -1  191.73   14.48 
  -6   4  -1  187.85   15.31 
   6   4   1  189.86   13.60 
  -6   4  -1  196.32   14.55 
  -6   4  -1  201.26   14.24 
   6   4   1  187.69   13.90 
  -6   4  -1  180.03   14.55 
   7  -4   1    9.80    3.76 
  -7  -4  -1    6.02    2.90 
   7  -4   1    6.93    2.59 
   7  -4   1    3.39    2.46 
  -7  -4  -1    7.11    2.87 
  -7  -4  -1    3.68    2.32 
   7  -4   1    8.01    2.55 
   7  -4   1    5.33    2.41 
  -7  -4  -1    1.24    1.94 
  -7  -4  -1    5.96    2.36 
  -7  -4  -1    2.05    2.32 
   7  -4   1    3.12    2.01 
   7  -4   1    5.13    2.28 
  -7  -4  -1    3.72    1.98 
   7  -4   1    2.77    2.17 
   7  -4   1    2.75    2.42 
   7  -4   1    3.42    2.76 
  -7  -4  -1    3.22    1.96 
  -7  -4  -1    5.79    2.53 
   7  -4   1    0.16    2.11 
  -7  -4  -1    3.36    2.45 
   7   4   1    6.22    2.76 
   7   4   1    3.27    1.97 
  -7   4  -1    3.82    3.05 
  -7   4  -1    2.51    2.35 
   7   4   1    5.38    2.16 
   7   4   1    0.51    1.90 
   7   4   1    5.32    3.12 
   7   4   1    2.78    1.75 
  -7   4  -1    1.51    3.06 
   7   4   1    2.45    2.08 
  -7   4  -1    5.64    2.71 
  -7   4  -1    8.31    2.95 
  -7   4  -1    2.41    2.11 
   7   4   1   -0.34    2.03 
  -7   4  -1    3.66    2.74 
   7   4   1    3.91    2.28 
  -7   4  -1    4.10    3.77 
  -7   4  -1    5.56    3.32 
  -7   4  -1    2.64    2.97 
   7   4   1    3.30    2.08 
  -7   4  -1    3.95    3.06 
   7   4   1    4.65    2.33 
  -8  -4  -1  199.36   15.24 
  -8  -4  -1  191.12   14.68 
  -8  -4  -1  188.26   14.68 
   8  -4   1  181.51   14.61 
   8  -4   1  193.44   14.59 
  -8  -4  -1  188.88   14.61 
   8  -4   1  190.53   14.41 
  -8  -4  -1  187.50   14.02 
   8  -4   1  159.63   14.61 
  -8  -4  -1  212.48   14.58 
   8  -4   1  179.59   15.17 
   8  -4   1  206.59   14.80 
  -8  -4  -1  200.41   15.44 
   8  -4   1  191.75   15.94 
   8  -4   1  189.27   14.27 
   8  -4   1  182.08   14.58 
  -8  -4  -1  184.49   14.32 
  -8  -4  -1  190.93   14.71 
   8   4   1  196.39   14.61 
  -8   4  -1  175.60   14.41 
   8   4   1  175.43   13.98 
   8   4   1  195.86   14.50 
  -8   4  -1  188.89   15.53 
  -8   4  -1  171.34   14.90 
  -8   4  -1  199.35   16.44 
  -8   4  -1  189.20   15.99 
  -8   4  -1  193.69   15.20 
  -8   4  -1  183.89   15.11 
  -8   4  -1  193.10   14.86 
   8   4   1  203.11   14.42 
   8   4   1  200.92   15.49 
  -8   4  -1  180.90   15.85 
   8   4   1  178.41   13.79 
  -8   4  -1  219.33   15.43 
  -8   4  -1  181.63   14.65 
   8   4   1  176.56   14.19 
   8   4   1  186.25   13.97 
   8   4   1  182.76   14.72 
   8   4   1  179.74   14.74 
  -9  -4  -1    3.49    2.53 
   9  -4   1    1.43    2.92 
  -9  -4  -1    1.08    2.99 
  -9  -4  -1    1.88    3.10 
   9  -4   1    3.47    3.04 
   9  -4   1    1.63    3.05 
  -9  -4  -1    0.30    2.69 
   9  -4   1    4.59    2.85 
  -9  -4  -1    2.08    2.57 
   9  -4   1    0.42    3.99 
  -9  -4  -1    4.26    2.78 
   9  -4   1   -1.70    2.46 
  -9  -4  -1   -1.46    2.64 
   9  -4   1   -0.44    2.32 
   9  -4   1    1.25    2.70 
   9  -4   1   -0.60    2.69 
  -9  -4  -1    0.56    3.02 
   9   4   1    7.04    3.44 
   9   4   1    2.00    3.29 
   9   4   1    1.34    2.84 
  -9   4  -1    4.09    3.99 
  -9   4  -1    0.16    3.74 
  -9   4  -1    1.73    3.59 
  -9   4  -1    1.33    2.85 
   9   4   1    0.39    2.20 
  -9   4  -1    0.93    3.64 
  -9   4  -1    1.56    2.67 
   9   4   1    1.10    2.27 
   9   4   1    0.59    1.95 
   9   4   1    1.69    2.64 
  -9   4  -1    0.70    3.57 
  -9   4  -1    2.24    3.40 
  -9   4  -1   -3.44    3.08 
  -9  -5   1    1.81    2.64 
   9  -5  -1    7.01    3.60 
  -9  -5   1    0.91    2.65 
   9  -5  -1    1.54    3.00 
   9  -5  -1    3.68    2.95 
   9  -5  -1    3.63    2.92 
  -9  -5   1    5.41    3.33 
  -9  -5   1    6.44    3.21 
   9  -5  -1    7.37    3.82 
  -9  -5   1    4.81    3.42 
   9  -5  -1   -0.37    3.75 
   9  -5  -1    4.91    3.22 
   9  -5  -1    1.89    2.92 
  -9  -5   1    3.93    3.50 
  -9  -5   1   -0.80    2.94 
   9  -5  -1    4.73    2.75 
  -9   5   1    0.19    4.35 
   9   5  -1   -2.70    2.12 
  -9   5   1    0.92    3.14 
   9   5  -1    1.88    3.29 
   9   5  -1    2.14    3.08 
  -9   5   1    2.24    3.37 
  -9   5   1   -0.91    4.04 
  -9   5   1   -7.52    3.63 
  -9   5   1   -0.23    3.64 
   9   5  -1    7.66    3.19 
  -9   5   1    0.08    4.11 
  -9   5   1    4.91    3.88 
  -9   5   1    1.14    4.76 
  -9   5   1    2.11    4.02 
   9   5  -1   -0.66    2.36 
  -8  -5   1    6.40    3.21 
  -8  -5   1    1.19    2.82 
  -8  -5   1    3.96    2.34 
  -8  -5   1    1.41    2.46 
  -8  -5   1    2.30    2.39 
   8  -5  -1    7.38    3.42 
   8  -5  -1    1.46    3.19 
   8  -5  -1    3.10    2.86 
  -8  -5   1    4.72    2.91 
   8  -5  -1   -0.28    2.46 
   8  -5  -1    2.06    2.26 
   8  -5  -1   -1.06    2.25 
  -8  -5   1    0.70    2.00 
   8  -5  -1   -3.14    2.53 
   8  -5  -1    1.19    2.61 
   8  -5  -1    0.16    2.29 
  -8  -5   1    3.71    2.67 
   8  -5  -1    2.02    2.71 
  -8   5   1    1.55    3.35 
  -8   5   1   -0.61    3.95 
   8   5  -1   -0.63    2.63 
  -8   5   1   -3.80    2.77 
  -8   5   1   -1.68    3.73 
   8   5  -1   -0.37    2.00 
   8   5  -1   -3.50    1.90 
  -8   5   1    6.16    4.00 
  -8   5   1    1.53    2.65 
  -8   5   1    0.97    3.33 
   8   5  -1    0.58    1.95 
  -8   5   1   -1.77    2.87 
  -8   5   1   -2.24    3.03 
  -8   5   1   -0.39    3.52 
   8   5  -1    2.21    2.47 
   8   5  -1   -1.49    2.57 
   8   5  -1   -0.28    3.06 
  -7  -5   1   37.69    5.82 
  -7  -5   1   46.15    5.82 
   7  -5  -1   42.70    5.57 
   7  -5  -1   50.64    5.97 
   7  -5  -1   50.15    5.75 
   7  -5  -1   43.84    6.34 
  -7  -5   1   41.11    4.97 
  -7  -5   1   47.15    5.47 
   7  -5  -1   39.05    5.64 
   7  -5  -1   38.42    5.43 
   7  -5  -1   44.39    5.39 
  -7  -5   1   40.80    5.63 
  -7  -5   1   47.88    6.28 
   7  -5  -1   50.26    5.66 
   7  -5  -1   35.83    5.64 
  -7  -5   1   44.05    5.51 
  -7  -5   1   46.59    5.29 
  -7  -5   1   39.85    4.87 
   7  -5  -1   36.78    5.54 
   7  -5  -1   37.85    6.00 
   7  -5  -1   39.32    6.26 
  -7   5   1   35.78    5.82 
   7   5  -1   49.92    6.06 
   7   5  -1   42.76    4.66 
   7   5  -1   43.63    5.19 
  -7   5   1   44.11    4.98 
  -7   5   1   34.31    5.92 
  -7   5   1   45.90    6.03 
  -7   5   1   56.22    7.91 
  -7   5   1   44.83    5.52 
  -7   5   1   47.04    6.73 
   7   5  -1   42.26    5.34 
   7   5  -1   49.87    5.03 
   7   5  -1   43.77    5.44 
   7   5  -1   45.18    5.14 
  -7   5   1   42.19    6.95 
   7   5  -1   32.62    5.53 
  -7   5   1   43.99    6.08 
   7   5  -1   39.84    5.55 
  -7   5   1   45.14    6.92 
  -7   5   1   42.14    5.97 
   6  -5  -1   -0.37    2.18 
   6  -5  -1    5.00    2.85 
   6  -5  -1    2.30    2.08 
   6  -5  -1    2.10    2.19 
  -6  -5   1   -1.58    1.94 
   6  -5  -1    0.29    2.32 
   6  -5  -1   -1.10    2.29 
   6  -5  -1    2.83    2.76 
  -6  -5   1    4.51    2.01 
  -6  -5   1    1.22    1.48 
  -6  -5   1    1.80    1.68 
  -6  -5   1    2.89    2.30 
   6  -5  -1    3.53    2.53 
  -6  -5   1    0.63    1.80 
  -6  -5   1    1.38    1.92 
   6  -5  -1   -0.42    1.88 
  -6  -5   1    3.36    2.32 
  -6  -5   1    1.64    2.38 
   6  -5  -1    4.58    2.29 
   6  -5  -1    2.24    2.38 
  -6   5   1    2.42    2.73 
   6   5  -1    2.24    2.42 
   6   5  -1    2.43    1.81 
  -6   5   1    5.86    2.78 
   6   5  -1    2.10    2.20 
   6   5  -1    3.40    1.55 
  -6   5   1   -1.02    2.46 
   6   5  -1    4.17    2.03 
   6   5  -1    2.34    1.64 
  -6   5   1   -0.20    3.01 
   6   5  -1    5.35    2.07 
   6   5  -1    1.49    2.01 
  -6   5   1    5.23    3.69 
   6   5  -1    2.74    1.48 
   6   5  -1    1.80    2.00 
  -6   5   1   -0.10    2.21 
  -6   5   1   -0.75    2.02 
  -6   5   1    3.50    3.21 
  -6   5   1   -0.64    2.42 
  -5  -5   1  273.42   17.69 
  -5  -5   1  254.51   17.70 
   5  -5  -1  261.39   18.77 
   5  -5  -1  230.66   18.87 
   5  -5  -1  271.81   18.64 
  -5  -5   1  243.44   17.72 
   5  -5  -1  264.16   18.65 
   5  -5  -1  252.50   18.44 
  -5  -5   1  225.49   18.50 
  -5  -5   1  258.80   17.79 
   5  -5  -1  255.28   18.33 
   5  -5  -1  239.83   18.23 
   5  -5  -1  266.24   18.36 
  -5  -5   1  247.90   17.51 
  -5  -5   1  243.13   18.49 
  -5  -5   1  258.58   18.27 
   5  -5  -1  245.94   18.50 
   5  -5  -1  251.55   18.46 
   5  -5  -1  237.28   18.87 
  -5  -5   1  265.02   18.45 
  -5   5   1  267.67   18.52 
  -5   5   1  267.29   18.22 
   5   5  -1  255.61   17.94 
  -5   5   1  264.10   20.07 
   5   5  -1  258.44   18.12 
  -5   5   1  263.40   18.83 
  -5   5   1  263.14   18.40 
   5   5  -1  252.20   18.07 
   5   5  -1  259.42   18.56 
  -5   5   1  241.56   19.13 
   5   5  -1  270.77   17.50 
  -5   5   1  278.28   20.10 
  -5   5   1  258.88   19.02 
   5   5  -1  234.64   17.83 
   5   5  -1  258.05   17.82 
  -5   5   1  258.62   17.83 
  -5   5   1  272.43   18.16 
   5   5  -1  246.56   17.94 
  -5   5   1  239.90   19.42 
   5   5  -1  256.62   18.03 
   5   5  -1  256.67   17.40 
  -4  -5   1    0.28    1.60 
  -4  -5   1    1.08    1.79 
  -4  -5   1    1.27    1.79 
   4  -5  -1   -0.94    2.51 
   4  -5  -1   -0.01    1.56 
  -4  -5   1    1.74    1.43 
   4  -5  -1    1.04    2.19 
   4  -5  -1   -0.74    1.41 
   4  -5  -1    0.61    1.93 
   4  -5  -1   -0.48    1.70 
  -4  -5   1    2.78    1.45 
  -4  -5   1    1.30    1.87 
   4  -5  -1    1.27    2.06 
   4  -5  -1    2.71    2.49 
  -4  -5   1    1.94    1.63 
   4  -5  -1    0.13    1.10 
  -4  -5   1   -1.81    1.42 
   4  -5  -1    2.79    1.89 
  -4  -5   1   -0.27    1.40 
  -4   5   1    2.70    3.04 
  -4   5   1    5.29    2.27 
   4   5  -1    0.22    1.72 
  -4   5   1    3.08    2.40 
  -4   5   1   -0.33    1.80 
  -4   5   1    4.68    2.89 
  -4   5   1    0.37    1.83 
  -4   5   1   -0.38    1.64 
   4   5  -1    1.19    1.88 
   4   5  -1   -0.15    1.62 
   4   5  -1    0.42    1.16 
  -4   5   1   -0.28    1.69 
   4   5  -1   -0.97    0.94 
  -4   5   1    0.84    3.26 
   4   5  -1    0.91    1.18 
  -4   5   1   -3.94    2.09 
   4   5  -1   -1.06    1.47 
   4   5  -1   -2.40    1.26 
   4   5  -1    0.20    1.46 
  -4   5   1    4.86    2.64 
   4   5  -1   -1.10    1.39 
   4   5  -1    0.66    1.90 
  -3  -5   1  132.18    9.79 
   3  -5  -1  141.12   11.55 
   3  -5  -1  154.62   11.20 
  -3  -5   1  137.62    9.65 
   3  -5  -1  132.87   10.39 
   3  -5  -1  137.79   10.55 
  -3  -5   1  131.66   10.08 
   3  -5  -1  133.51   10.37 
   3  -5  -1  136.22   10.66 
  -3  -5   1  137.74   10.34 
  -3  -5   1  131.37   10.44 
   3  -5  -1  129.31   10.47 
  -3  -5   1  131.69   10.50 
   3  -5  -1  149.07   11.94 
  -3  -5   1  131.06    9.87 
   3  -5  -1  144.74   11.45 
  -3  -5   1  134.60   10.17 
   3  -5  -1  142.12    9.62 
  -3  -5   1  133.44   10.04 
   3   5  -1  132.58   10.26 
  -3   5   1  133.61   12.10 
   3   5  -1  136.84   10.04 
  -3   5   1  133.39   10.18 
   3   5  -1  137.92   10.18 
  -3   5   1  147.40   11.37 
  -3   5   1   91.14   11.38 
   3   5  -1  151.25    9.92 
   3   5  -1  150.31    9.53 
  -3   5   1  122.78   10.16 
  -3   5   1  106.33   11.56 
  -3   5   1  145.24   11.29 
   3   5  -1  136.15   10.22 
  -3   5   1  132.92   10.23 
  -3   5   1  127.74   10.06 
  -3   5   1  112.83   11.22 
   3   5  -1  136.56    9.52 
   3   5  -1  142.30    9.63 
   3   5  -1  144.11   10.30 
   3   5  -1  144.62   10.15 
  -3   5   1  130.60   10.27 
   3   5  -1  135.97   10.60 
  -2  -5   1    3.22    1.91 
  -2  -5   1    2.90    1.55 
  -2  -5   1    2.87    1.91 
   2  -5  -1    2.44    1.65 
   2  -5  -1    2.85    1.78 
   2  -5  -1    2.83    2.34 
   2  -5  -1    4.09    2.62 
   2  -5  -1    2.04    1.27 
   2  -5  -1    2.04    1.65 
   2  -5  -1   -0.35    1.85 
   2  -5  -1    2.76    1.69 
   2  -5  -1   -1.13    2.43 
  -2  -5   1    3.00    1.85 
  -2  -5   1    0.90    1.54 
  -2  -5   1    0.07    1.16 
  -2  -5   1    1.02    1.35 
   2  -5  -1    3.32    1.66 
  -2  -5   1    1.96    1.62 
   2   5  -1    0.71    0.82 
  -2   5   1    1.20    3.11 
   2   5  -1    1.21    1.88 
   2   5  -1    2.24    1.52 
   2   5  -1    2.79    1.81 
  -2   5   1   -2.36    1.99 
  -2   5   1    0.46    2.22 
   2   5  -1    2.25    0.76 
   2   5  -1    0.76    0.99 
  -2   5   1    3.58    2.37 
   2   5  -1    6.16    1.87 
   2   5  -1    1.28    1.37 
   2   5  -1   -2.43    1.47 
   2   5  -1    1.69    1.51 
  -2   5   1    3.35    1.53 
   2   5  -1    0.17    0.95 
  -2   5   1    1.78    1.52 
  -2   5   1    0.02    1.51 
  -2   5   1    0.88    1.59 
  -2   5   1    1.56    2.17 
  -2   5   1    1.74    2.47 
  -2   5   1    1.81    1.66 
   2   5  -1    0.75    1.75 
   1  -5  -1   48.38    5.10 
   1  -5  -1   34.80    4.96 
  -1  -5   1   36.20    5.03 
  -1  -5   1   30.69    4.55 
   1  -5  -1   39.68    6.25 
   1  -5  -1   38.65    5.25 
  -1  -5   1   37.49    4.03 
  -1  -5   1   43.89    4.41 
   1  -5  -1   42.89    4.74 
   1  -5  -1   53.46    7.08 
   1  -5  -1   40.23    4.45 
   1  -5  -1   39.00    3.18 
   1  -5  -1   35.50    5.45 
  -1  -5   1   46.62    5.40 
   1  -5  -1   36.79    4.44 
   1  -5  -1   41.57    6.31 
  -1  -5   1   35.30    4.41 
   1  -5  -1   32.90    4.41 
  -1  -5   1   46.07    4.04 
   1   5  -1   38.14    2.85 
   1   5  -1   34.05    2.95 
   1   5  -1   35.88    4.29 
  -1   5   1   44.05    3.87 
   1   5  -1   35.63    4.44 
  -1   5   1   38.64    6.01 
   1   5  -1   37.27    5.58 
  -1   5   1   38.29    4.39 
  -1   5   1   37.46    5.41 
   1   5  -1   40.34    4.18 
   1   5  -1   37.21    3.21 
   1   5  -1   37.57    4.11 
   1   5  -1   40.11    4.31 
  -1   5   1   33.91    4.35 
   1   5  -1   43.92    4.12 
  -1   5   1   43.94    3.78 
   1   5  -1   33.55    3.41 
  -1   5   1   47.76    8.05 
  -1   5   1   46.98    5.69 
   1   5  -1   34.69    4.76 
   1   5  -1   38.47    4.22 
  -1   5   1   43.95    4.35 
   1   5  -1   46.59    5.84 
   1   5  -1   38.68    5.47 
  -1   5   1   45.72    6.41 
   0  -5   1   15.55    2.55 
   0  -5  -1   13.68    3.53 
   0  -5  -1   13.41    3.03 
   0  -5  -1   19.93    3.90 
   0  -5  -1   13.11    2.52 
   0  -5   1   15.42    2.79 
   0  -5   1   11.39    3.40 
   0  -5  -1   25.91    5.01 
   0  -5   1   14.14    3.18 
   0  -5  -1   11.35    3.85 
   0  -5   1    7.36    3.13 
   0  -5   1    5.44    3.25 
   0  -5   1   12.60    2.43 
   0  -5   1    3.57    3.28 
   0  -5   1    7.79    4.34 
   0  -5  -1   15.03    2.64 
   0  -5   1   16.89    3.68 
   0  -5   1   14.02    2.33 
   0  -5  -1   13.37    2.54 
   0  -5  -1    7.18    3.55 
   0  -5   1   16.61    1.98 
   0  -5  -1   16.46    2.81 
   0  -5   1   17.31    2.91 
   0  -5  -1   17.29    2.67 
   0   5  -1   17.22    2.70 
   0   5  -1   10.60    2.57 
   0   5  -1   14.42    2.57 
   0   5  -1   14.45    1.74 
   0   5   1   16.35    4.19 
   0   5  -1   17.39    2.80 
   0   5  -1   18.03    1.95 
   0   5  -1   19.13    3.94 
   0   5   1   16.47    2.75 
   0   5   1   14.95    1.90 
   0   5  -1   14.85    3.87 
   0   5   1   16.13    2.67 
   0   5   1   13.57    4.47 
   0   5   1   17.50    2.82 
   0   5  -1   12.07    1.79 
   0   5   1   24.10    5.19 
   0   5  -1   17.44    2.59 
   0   5   1   17.48    3.93 
   0   5   1   11.73    1.84 
   0   5   1   19.06    3.58 
   0   5  -1   17.99    4.15 
   0   5   1   14.95    2.72 
   0   5  -1   14.79    2.80 
   1  -5   1  349.68   23.72 
   1  -5   1  336.92   22.45 
   1  -5   1  332.72   22.47 
  -1  -5  -1  318.32   22.55 
  -1  -5  -1  337.58   22.55 
   1  -5   1  350.07   24.61 
  -1  -5  -1  324.62   23.30 
  -1  -5  -1  301.17   22.89 
   1  -5   1  315.18   23.89 
   1  -5   1  316.96   23.26 
  -1  -5  -1  328.32   22.42 
  -1  -5  -1  310.90   22.39 
   1  -5   1  342.34   22.61 
  -1  -5  -1  341.83   23.16 
   1  -5   1  301.94   24.18 
   1  -5   1  381.31   24.94 
  -1  -5  -1  338.68   22.53 
   1   5   1  328.41   22.52 
   1   5   1  325.69   24.13 
   1   5   1  316.42   22.51 
   1   5   1  294.31   23.72 
  -1   5  -1  319.05   24.49 
   1   5   1  285.05   23.59 
  -1   5  -1  379.86   24.45 
   1   5   1  313.95   21.57 
   1   5   1  339.61   22.98 
  -1   5  -1  356.87   23.97 
  -1   5  -1  324.41   22.52 
  -1   5  -1  312.35   22.43 
  -1   5  -1  378.13   24.23 
   1   5   1  303.66   22.53 
   1   5   1  344.66   22.68 
  -1   5  -1  333.18   21.98 
  -1   5  -1  382.73   23.18 
  -1   5  -1  317.76   22.33 
   1   5   1  301.87   21.91 
  -1   5  -1  323.34   21.80 
  -2  -5  -1   22.49    2.82 
   2  -5   1   17.00    3.47 
  -2  -5  -1   21.42    3.07 
  -2  -5  -1   17.21    2.94 
  -2  -5  -1   24.82    3.42 
   2  -5   1   20.54    2.17 
  -2  -5  -1   19.69    3.41 
   2  -5   1   22.31    2.57 
   2  -5   1   19.88    2.99 
   2  -5   1   17.66    3.96 
  -2  -5  -1   25.75    3.23 
   2  -5   1   19.08    2.80 
   2  -5   1   13.95    4.08 
   2  -5   1   23.86    3.26 
  -2  -5  -1   23.36    3.29 
   2  -5   1   18.99    4.24 
  -2  -5  -1   18.34    2.79 
  -2   5  -1   15.38    3.25 
  -2   5  -1   18.30    2.82 
  -2   5  -1   12.36    3.34 
  -2   5  -1   22.81    2.82 
  -2   5  -1    8.68    4.29 
  -2   5  -1   17.01    4.07 
   2   5   1   24.74    3.30 
  -2   5  -1   14.91    3.80 
  -2   5  -1   18.01    4.19 
   2   5   1   26.69    3.60 
   2   5   1   18.72    3.90 
  -2   5  -1   22.97    2.68 
   2   5   1   20.59    3.40 
   2   5   1   18.71    1.89 
   2   5   1   26.07    4.26 
   2   5   1   26.61    3.40 
   2   5   1   22.11    3.21 
   2   5   1   19.57    2.97 
   2   5   1   19.57    2.18 
   2   5   1   15.29    2.92 
   2   5   1   22.39    3.34 
   2   5   1   21.37    3.10 
  -2   5  -1   16.98    2.89 
   3  -5   1  354.49   24.29 
   3  -5   1  373.09   24.17 
   3  -5   1  356.46   25.21 
  -3  -5  -1  334.15   24.20 
   3  -5   1  352.74   24.18 
   3  -5   1  385.07   24.81 
  -3  -5  -1  319.25   24.23 
  -3  -5  -1  336.69   23.99 
   3  -5   1  382.63   25.25 
  -3  -5  -1  353.66   23.92 
  -3  -5  -1  363.24   24.03 
   3  -5   1  355.00   25.34 
  -3  -5  -1  356.83   24.55 
  -3  -5  -1  340.35   24.19 
   3  -5   1  352.49   23.66 
  -3  -5  -1  370.33   23.99 
   3  -5   1  359.51   24.85 
   3   5   1  374.64   25.28 
  -3   5  -1  348.74   25.32 
  -3   5  -1  296.17   25.60 
  -3   5  -1  353.92   23.84 
  -3   5  -1  383.19   24.79 
  -3   5  -1  333.42   23.99 
   3   5   1  359.79   24.25 
   3   5   1  351.33   24.24 
  -3   5  -1  366.34   25.82 
   3   5   1  335.76   23.99 
  -3   5  -1  358.56   24.12 
   3   5   1  352.11   23.79 
  -3   5  -1  341.07   23.83 
   3   5   1  346.35   23.00 
   3   5   1  348.24   23.32 
  -3   5  -1  375.46   25.07 
  -3   5  -1  359.38   24.06 
   3   5   1  348.18   23.89 
   3   5   1  358.88   24.50 
   3   5   1  329.44   24.04 
   3   5   1  349.27   24.16 
   3   5   1  352.12   24.37 
   3   5   1  352.13   24.20 
  -4  -5  -1    0.15    1.54 
   4  -5   1    1.90    2.05 
   4  -5   1    2.36    2.01 
   4  -5   1    0.52    2.21 
  -4  -5  -1   -0.58    1.51 
   4  -5   1    1.09    2.07 
  -4  -5  -1    0.61    1.74 
  -4  -5  -1    3.54    1.92 
   4  -5   1    0.79    1.65 
   4  -5   1   -1.12    1.46 
  -4  -5  -1   -0.66    1.77 
  -4  -5  -1    0.42    1.43 
   4  -5   1    0.70    3.11 
  -4  -5  -1    0.36    1.75 
  -4  -5  -1    1.40    1.67 
   4  -5   1   -0.69    1.95 
  -4  -5  -1    0.48    1.61 
   4   5   1    1.34    1.51 
   4   5   1    2.33    1.83 
  -4   5  -1   -1.90    2.30 
   4   5   1    1.01    1.52 
  -4   5  -1    2.28    3.40 
  -4   5  -1   -0.43    1.93 
  -4   5  -1    3.46    2.28 
   4   5   1    0.68    1.63 
   4   5   1   -1.26    1.41 
  -4   5  -1    0.84    2.16 
   4   5   1    1.63    2.03 
  -4   5  -1    1.19    1.81 
  -4   5  -1    0.32    1.61 
   4   5   1    1.27    1.94 
   4   5   1   -0.58    0.90 
   4   5   1    2.14    1.87 
   4   5   1    4.24    2.27 
  -4   5  -1    1.91    2.81 
   4   5   1    1.41    1.56 
  -4   5  -1   -0.76    1.90 
  -4   5  -1   -3.88    2.76 
   4   5   1    2.06    1.71 
  -5  -5  -1   27.53    3.65 
   5  -5   1   29.86    3.80 
  -5  -5  -1   24.86    3.96 
  -5  -5  -1   15.77    2.93 
  -5  -5  -1   18.16    3.40 
   5  -5   1   15.74    3.54 
  -5  -5  -1   29.22    4.13 
   5  -5   1   19.45    3.82 
  -5  -5  -1   17.00    3.40 
   5  -5   1   22.58    3.51 
   5  -5   1   25.34    4.26 
   5  -5   1   19.85    3.45 
   5  -5   1   25.57    4.06 
   5  -5   1   26.17    5.06 
  -5  -5  -1   25.57    3.52 
  -5  -5  -1   25.21    3.19 
   5  -5   1   21.75    3.59 
   5  -5   1   21.84    3.85 
  -5  -5  -1   20.03    2.90 
  -5  -5  -1   17.81    3.68 
  -5   5  -1   28.03    5.34 
  -5   5  -1   18.15    3.53 
  -5   5  -1   26.03    5.10 
   5   5   1   23.76    2.55 
  -5   5  -1   21.01    3.37 
   5   5   1   23.41    3.54 
  -5   5  -1   22.70    5.10 
  -5   5  -1   21.42    3.74 
  -5   5  -1   28.58    4.46 
   5   5   1   21.32    3.14 
   5   5   1   30.03    3.84 
   5   5   1   28.18    3.88 
   5   5   1   26.16    3.89 
   5   5   1   23.63    3.44 
   5   5   1   17.88    3.15 
   5   5   1   21.57    3.97 
   5   5   1   24.63    3.48 
  -5   5  -1   23.52    3.54 
   5   5   1   25.52    3.23 
  -5   5  -1   21.07    4.36 
   5   5   1   18.94    3.69 
  -5   5  -1   21.16    3.80 
  -6  -5  -1    0.95    2.28 
  -6  -5  -1    1.35    1.54 
   6  -5   1    0.46    2.20 
   6  -5   1    1.67    2.11 
   6  -5   1    0.62    2.49 
   6  -5   1    4.89    2.38 
  -6  -5  -1    3.90    2.11 
   6  -5   1    6.32    2.35 
   6  -5   1    3.94    2.20 
   6  -5   1   -1.97    2.24 
  -6  -5  -1    1.11    2.19 
  -6  -5  -1    1.45    2.26 
   6  -5   1    1.64    2.11 
  -6  -5  -1    2.41    1.86 
   6  -5   1    1.85    2.43 
   6  -5   1    0.33    2.23 
  -6  -5  -1    4.27    2.38 
  -6  -5  -1    2.90    2.11 
   6  -5   1    1.63    3.20 
  -6  -5  -1    2.65    2.38 
  -6   5  -1   -0.33    2.66 
   6   5   1    3.17    2.36 
  -6   5  -1    1.80    2.54 
  -6   5  -1   -0.87    3.18 
   6   5   1   -0.27    2.17 
   6   5   1    3.13    1.95 
  -6   5  -1    3.24    2.42 
  -6   5  -1    1.06    3.25 
   6   5   1    1.30    1.72 
   6   5   1    0.69    2.12 
   6   5   1   -1.47    1.66 
  -6   5  -1   -0.74    2.33 
   6   5   1    0.09    2.08 
   6   5   1    3.49    1.75 
  -6   5  -1   -0.24    2.07 
   6   5   1   -2.77    1.65 
  -6   5  -1    1.12    3.44 
  -6   5  -1    1.41    2.57 
   6   5   1   -0.47    1.52 
  -6   5  -1    0.28    2.51 
   6   5   1   -0.92    2.13 
   7  -5   1    1.68    2.39 
   7  -5   1    5.76    2.70 
  -7  -5  -1    4.94    2.52 
  -7  -5  -1    2.29    2.61 
  -7  -5  -1    9.99    3.04 
   7  -5   1    0.95    2.38 
   7  -5   1    6.87    2.59 
   7  -5   1   10.63    4.05 
   7  -5   1    2.54    2.24 
  -7  -5  -1    3.54    2.82 
  -7  -5  -1    9.36    2.75 
   7  -5   1    3.82    2.65 
  -7  -5  -1    6.76    2.48 
   7  -5   1    7.25    3.22 
  -7  -5  -1    8.79    2.61 
   7  -5   1    3.17    2.69 
  -7  -5  -1    4.92    2.67 
   7  -5   1    5.16    2.70 
  -7  -5  -1    5.41    3.25 
   7  -5   1    8.71    3.09 
  -7   5  -1    2.60    2.53 
   7   5   1    8.80    2.99 
   7   5   1    4.93    2.19 
  -7   5  -1    3.70    3.07 
   7   5   1    6.14    2.14 
   7   5   1    1.63    2.51 
  -7   5  -1    2.44    3.09 
   7   5   1    4.72    2.60 
  -7   5  -1    4.21    3.30 
  -7   5  -1    1.74    3.65 
   7   5   1    5.91    3.14 
   7   5   1    2.43    2.35 
  -7   5  -1    3.36    2.87 
  -7   5  -1    3.60    3.08 
   7   5   1    4.38    2.53 
   7   5   1    2.82    1.80 
   7   5   1    1.59    2.34 
  -7   5  -1    2.20    3.63 
  -7   5  -1    6.79    3.15 
  -7   5  -1   -0.10    3.51 
  -8  -5  -1    2.19    3.05 
  -8  -5  -1    3.17    2.35 
  -8  -5  -1    4.36    2.77 
   8  -5   1    5.48    3.24 
  -8  -5  -1    2.56    2.75 
  -8  -5  -1   11.76    3.23 
  -8  -5  -1    2.46    2.73 
   8  -5   1    4.89    2.92 
   8  -5   1    2.70    3.09 
  -8  -5  -1    7.19    3.21 
   8  -5   1    6.71    3.47 
  -8  -5  -1    3.72    3.05 
   8  -5   1    2.84    2.72 
   8  -5   1    6.76    3.71 
  -8  -5  -1    3.76    2.64 
   8  -5   1    4.36    2.81 
   8  -5   1   10.70    3.33 
   8   5   1    4.76    3.30 
   8   5   1    5.59    2.34 
  -8   5  -1    3.40    2.85 
  -8   5  -1    4.52    3.96 
   8   5   1    5.74    2.63 
   8   5   1    2.99    2.51 
   8   5   1    8.86    3.10 
  -8   5  -1    4.02    2.96 
  -8   5  -1    2.72    3.57 
  -8   5  -1   -0.86    3.45 
  -8   5  -1    5.45    3.59 
  -8   5  -1    7.45    4.44 
  -8   5  -1    1.16    4.04 
  -8   5  -1    0.33    2.96 
   8   5   1    1.60    3.22 
   8   5   1   -0.10    2.02 
   8   5   1    4.43    2.64 
   8   5   1    3.50    2.99 
  -8   5  -1    2.74    4.43 
  -8   5  -1    0.96    3.15 
   9  -5   1    6.66    4.35 
  -9  -5  -1    0.48    2.90 
  -9  -5  -1    0.19    2.75 
   9  -5   1    1.77    2.92 
   9  -5   1   -0.11    2.96 
   9  -5   1    1.41    3.20 
  -9  -5  -1    2.35    3.28 
   9  -5   1   -0.81    2.94 
  -9  -5  -1    8.01    3.63 
  -9  -5  -1   -4.11    2.21 
   9  -5   1   -0.60    2.97 
   9  -5   1    1.08    3.00 
   9  -5   1    4.72    2.86 
  -9  -5  -1    1.92    3.12 
  -9  -5  -1    2.47    3.06 
   9   5   1    0.54    3.02 
  -9   5  -1   -0.52    2.89 
   9   5   1   -1.28    2.09 
   9   5   1   -1.31    2.62 
  -9   5  -1   -2.96    3.08 
   9   5   1   -0.50    2.54 
  -9   5  -1   -3.62    3.78 
  -9   5  -1    0.83    4.43 
  -9   5  -1    2.67    3.57 
  -9   5  -1   -0.90    3.69 
  -9   5  -1   -2.34    4.14 
   9   5   1   -0.60    2.32 
   9   5   1    3.30    2.91 
  -9   5  -1    7.25    4.96 
  -9   5  -1    1.33    3.65 
   8  -6  -1   11.63    4.29 
   8  -6  -1   21.71    4.82 
  -8  -6   1   33.21    5.51 
   8  -6  -1   18.60    4.26 
   8  -6  -1   23.28    5.41 
  -8  -6   1   22.60    4.87 
  -8  -6   1   24.39    4.23 
   8  -6  -1   18.73    4.72 
   8  -6  -1   35.35    5.61 
   8  -6  -1   22.51    4.39 
  -8  -6   1   22.20    4.64 
  -8  -6   1   20.75    4.01 
   8  -6  -1   23.92    5.07 
  -8  -6   1   22.97    4.45 
  -8  -6   1   18.05    4.68 
  -8   6   1   22.96    5.46 
  -8   6   1   14.19    4.56 
   8   6  -1   33.05    4.69 
   8   6  -1   22.02    4.34 
  -8   6   1   19.62    5.48 
  -8   6   1   22.18    5.09 
  -8   6   1   17.10    5.06 
   8   6  -1   28.87    5.34 
   8   6  -1   16.31    4.23 
  -8   6   1   22.20    6.63 
  -8   6   1   22.98    5.38 
  -8   6   1   23.32    4.61 
  -8   6   1   17.10    5.97 
  -8   6   1   23.45    6.11 
   7  -6  -1    1.41    2.49 
  -7  -6   1   -0.97    2.37 
   7  -6  -1    3.74    3.19 
  -7  -6   1    5.09    3.12 
  -7  -6   1    3.16    2.37 
   7  -6  -1   -0.12    2.57 
   7  -6  -1    7.16    3.11 
   7  -6  -1    2.38    2.85 
  -7  -6   1    5.03    2.46 
   7  -6  -1    5.88    3.50 
  -7  -6   1    1.44    2.25 
   7  -6  -1    3.02    3.23 
   7  -6  -1    0.63    2.97 
  -7  -6   1    0.13    2.60 
  -7  -6   1    1.36    2.42 
   7  -6  -1   -4.80    2.59 
  -7  -6   1    0.94    2.40 
   7  -6  -1    2.73    2.78 
  -7   6   1    5.22    2.89 
  -7   6   1   -1.39    3.20 
   7   6  -1    2.18    1.88 
  -7   6   1   -1.89    3.86 
  -7   6   1    1.95    3.43 
  -7   6   1   -0.17    3.11 
   7   6  -1    2.92    2.28 
  -7   6   1    8.37    4.48 
  -7   6   1   -2.47    3.05 
   7   6  -1   -0.12    2.74 
   7   6  -1    2.77    2.50 
  -7   6   1    2.59    3.34 
   7   6  -1    3.54    2.37 
  -7   6   1    2.84    4.59 
  -7   6   1    9.22    3.10 
   7   6  -1    2.80    2.97 
   6  -6  -1   30.26    5.29 
  -6  -6   1   34.12    5.34 
   6  -6  -1   34.40    4.79 
  -6  -6   1   38.30    4.58 
  -6  -6   1   23.00    4.69 
   6  -6  -1   29.44    4.89 
   6  -6  -1   31.62    5.19 
  -6  -6   1   25.81    4.28 
   6  -6  -1   39.05    5.58 
  -6  -6   1   32.82    3.95 
   6  -6  -1   35.69    5.69 
   6  -6  -1   31.78    5.72 
   6  -6  -1   34.47    5.07 
   6  -6  -1   17.77    4.22 
  -6  -6   1   31.15    4.16 
  -6  -6   1   29.41    4.72 
  -6  -6   1   36.00    4.17 
   6  -6  -1   24.23    4.68 
  -6  -6   1   27.42    4.72 
   6  -6  -1   25.56    4.48 
  -6   6   1   28.63    6.57 
   6   6  -1   30.30    4.30 
   6   6  -1   24.15    3.66 
   6   6  -1   37.67    4.49 
   6   6  -1   31.11    3.76 
  -6   6   1   36.10    4.68 
  -6   6   1   31.72    5.60 
  -6   6   1   28.40    4.51 
  -6   6   1   36.41    5.26 
  -6   6   1   30.59    5.77 
   6   6  -1   26.11    4.88 
  -6   6   1   30.39    5.24 
  -6   6   1   29.54    5.11 
  -6   6   1   39.44    7.23 
   6   6  -1   32.27    4.66 
  -6   6   1   36.48    6.78 
   6   6  -1   24.77    4.31 
   5  -6  -1   16.20    3.81 
  -5  -6   1   21.01    4.10 
  -5  -6   1   21.38    4.15 
  -5  -6   1   27.84    3.60 
  -5  -6   1   23.16    3.47 
   5  -6  -1   22.86    3.97 
  -5  -6   1   23.88    4.47 
   5  -6  -1   20.91    4.35 
   5  -6  -1   23.85    4.54 
   5  -6  -1   17.70    3.96 
   5  -6  -1   19.65    4.62 
   5  -6  -1   16.86    3.61 
   5  -6  -1   20.34    3.76 
  -5  -6   1   21.85    3.43 
   5  -6  -1   26.39    5.01 
   5  -6  -1   24.05    4.39 
  -5  -6   1   30.06    3.69 
  -5  -6   1   26.09    4.11 
  -5  -6   1   22.74    3.37 
   5   6  -1   22.26    3.62 
   5   6  -1   22.11    3.40 
  -5   6   1   18.98    3.48 
  -5   6   1   16.06    3.58 
   5   6  -1   24.14    3.02 
  -5   6   1   15.45    5.18 
  -5   6   1   21.22    4.20 
   5   6  -1   20.13    4.28 
   5   6  -1   24.88    3.34 
   5   6  -1   26.34    3.85 
   5   6  -1   26.49    3.67 
  -5   6   1   17.06    5.33 
  -5   6   1   22.59    5.01 
  -5   6   1   16.29    5.25 
  -5   6   1   24.78    4.10 
  -5   6   1   23.50    4.99 
  -5   6   1   25.66    4.90 
   5   6  -1   22.38    3.63 
   5   6  -1   27.97    4.11 
   5   6  -1   22.77    3.09 
  -5   6   1   20.49    3.72 
   4  -6  -1   74.20    7.35 
   4  -6  -1   72.83    5.80 
   4  -6  -1   63.42    8.83 
  -4  -6   1   79.84    7.19 
   4  -6  -1   90.27    9.47 
   4  -6  -1   77.44    7.37 
  -4  -6   1   74.54    7.97 
  -4  -6   1   84.76    7.48 
   4  -6  -1   76.23    7.63 
   4  -6  -1   74.44    7.49 
  -4  -6   1   77.64    6.73 
  -4  -6   1   62.57    6.53 
   4  -6  -1   77.83    8.59 
   4  -6  -1   83.23    6.95 
   4  -6  -1   77.42    7.26 
   4  -6  -1   81.65    8.68 
  -4  -6   1   72.60    7.39 
  -4  -6   1   77.84    6.68 
  -4  -6   1   76.54    6.43 
   4   6  -1   96.00    7.33 
   4   6  -1   88.43    7.67 
   4   6  -1   67.86    6.39 
   4   6  -1   78.66    6.66 
   4   6  -1   77.15    7.16 
   4   6  -1   74.77    6.96 
  -4   6   1   75.69    7.14 
   4   6  -1   78.69    6.32 
  -4   6   1   72.25    7.13 
  -4   6   1   70.33    8.50 
   4   6  -1   67.34    5.96 
   4   6  -1   78.18    6.08 
  -4   6   1   82.84    7.20 
   4   6  -1   67.94    6.67 
  -4   6   1   67.79    9.48 
  -4   6   1   58.80    8.78 
   4   6  -1   76.36    6.83 
  -4   6   1   60.99    8.52 
  -4   6   1   75.34    7.05 
  -4   6   1   85.21    7.23 
  -4   6   1   54.02    8.93 
   3  -6  -1    7.72    1.85 
   3  -6  -1    6.53    3.39 
   3  -6  -1    5.00    2.43 
   3  -6  -1    8.23    2.68 
  -3  -6   1   11.92    2.62 
  -3  -6   1    6.49    2.58 
  -3  -6   1   10.48    2.74 
   3  -6  -1    7.78    2.15 
  -3  -6   1    7.08    2.18 
   3  -6  -1    6.10    3.14 
   3  -6  -1    2.89    3.48 
  -3  -6   1   11.29    2.55 
  -3  -6   1    5.49    2.70 
   3  -6  -1    9.81    2.73 
   3  -6  -1    2.76    3.12 
  -3  -6   1    8.65    2.58 
   3  -6  -1    5.16    2.49 
   3  -6  -1    5.76    3.98 
  -3   6   1    8.11    2.52 
   3   6  -1   11.92    2.16 
  -3   6   1    6.25    2.51 
   3   6  -1    8.72    2.77 
   3   6  -1   12.41    2.64 
   3   6  -1   12.24    2.63 
   3   6  -1    6.64    2.51 
  -3   6   1    4.38    4.47 
   3   6  -1    8.59    2.23 
  -3   6   1    4.68    3.86 
  -3   6   1    4.74    2.49 
  -3   6   1    0.84    2.86 
   3   6  -1    6.92    2.59 
   3   6  -1    9.76    3.35 
  -3   6   1    7.56    3.75 
   3   6  -1    5.06    2.63 
  -3   6   1    7.53    2.52 
   3   6  -1    6.42    2.30 
  -3   6   1    2.41    3.05 
   3   6  -1    9.31    2.43 
  -3   6   1    7.48    3.33 
   2  -6  -1    0.78    1.75 
  -2  -6   1    3.05    1.92 
  -2  -6   1    4.46    2.82 
   2  -6  -1    1.78    1.37 
  -2  -6   1    5.05    2.63 
   2  -6  -1    0.13    3.62 
  -2  -6   1    3.08    1.80 
  -2  -6   1    3.35    2.28 
   2  -6  -1    4.79    2.23 
   2  -6  -1    2.78    2.73 
   2  -6  -1    3.89    2.34 
  -2  -6   1    5.25    2.51 
  -2  -6   1    3.36    1.91 
   2  -6  -1   -3.25    2.38 
   2  -6  -1    0.22    1.99 
  -2  -6   1    1.03    1.61 
   2  -6  -1    1.52    3.22 
   2  -6  -1    1.78    2.08 
  -2  -6   1    1.79    1.95 
   2   6  -1   -2.19    1.79 
   2   6  -1    2.13    2.02 
   2   6  -1    1.63    1.13 
  -2   6   1   -0.54    2.81 
  -2   6   1   -0.80    2.00 
  -2   6   1    5.82    3.69 
   2   6  -1   -2.72    1.69 
   2   6  -1    6.50    2.97 
   2   6  -1    3.22    2.48 
   2   6  -1    3.89    2.10 
   2   6  -1    1.66    1.88 
  -2   6   1    4.09    4.02 
  -2   6   1    3.90    2.78 
  -2   6   1    3.95    1.93 
  -2   6   1    0.06    1.64 
   2   6  -1    1.46    1.04 
  -2   6   1    0.24    1.97 
  -2   6   1    1.50    2.53 
  -2   6   1    1.70    2.10 
   2   6  -1    5.27    2.05 
   2   6  -1    0.59    1.77 
  -1  -6   1   -0.46    1.65 
  -1  -6   1    1.40    2.44 
   1  -6  -1    4.99    2.03 
   1  -6  -1    0.49    2.00 
   1  -6  -1   -4.57    3.15 
   1  -6  -1    0.37    2.53 
  -1  -6   1   -0.26    2.53 
   1  -6  -1   -2.51    2.73 
  -1  -6   1    0.62    1.67 
  -1  -6   1    1.51    1.55 
  -1  -6   1    2.13    1.79 
   1  -6  -1   -1.02    2.74 
   1  -6  -1    1.47    1.76 
   1  -6  -1    1.20    1.74 
  -1  -6   1    4.88    2.74 
   1  -6  -1   -2.19    3.14 
  -1  -6   1    0.56    1.69 
   1  -6  -1    3.29    2.87 
   1  -6  -1    1.55    1.96 
  -1  -6   1    1.17    2.59 
   1   6  -1    1.68    2.33 
   1   6  -1    2.04    2.05 
  -1   6   1    4.26    1.67 
   1   6  -1    0.54    1.70 
  -1   6   1    2.44    1.56 
   1   6  -1   -1.91    1.48 
   1   6  -1   -1.03    0.87 
  -1   6   1    1.40    1.87 
   1   6  -1   -0.82    1.17 
   1   6  -1   -0.67    2.54 
  -1   6   1    2.05    2.34 
  -1   6   1    1.45    2.69 
   1   6  -1   -2.03    2.64 
   1   6  -1    2.01    1.14 
  -1   6   1   -1.65    2.01 
   1   6  -1   -0.03    1.71 
   1   6  -1    0.91    1.92 
  -1   6   1    3.17    1.96 
  -1   6   1    4.98    3.30 
   1   6  -1   -1.09    2.71 
   1   6  -1   -0.38    1.67 
  -1   6   1    0.35    3.18 
   1   6  -1    0.01    0.73 
  -1   6   1   -0.24    1.61 
   1   6  -1    1.30    1.95 
   0  -6   1   96.78    8.48 
   0  -6  -1   73.78    7.08 
   0  -6   1   74.05    8.36 
   0  -6  -1   90.41    7.14 
   0  -6   1   80.91    8.14 
   0  -6  -1   78.25    8.61 
   0  -6   1   86.95    6.79 
   0  -6  -1   54.67    8.38 
   0  -6  -1   61.14    8.93 
   0  -6   1   51.58    8.10 
   0  -6  -1   94.76    8.50 
   0  -6   1   86.66    7.22 
   0  -6  -1   84.71    7.73 
   0  -6   1   77.23    9.39 
   0  -6  -1   68.18    6.78 
   0  -6   1   75.44    6.95 
   0  -6   1   79.72    9.25 
   0  -6  -1   85.41    7.08 
   0  -6  -1   81.45    9.71 
   0  -6   1   86.41    6.98 
   0  -6  -1   88.01    7.21 
   0   6  -1   81.26    8.73 
   0   6   1   92.64   10.60 
   0   6   1   77.60    6.10 
   0   6  -1   94.20    6.92 
   0   6   1   79.21    5.99 
   0   6   1   69.68    7.01 
   0   6  -1   73.75    5.87 
   0   6  -1   70.73    6.72 
   0   6   1   79.19    9.66 
   0   6  -1   83.06    6.96 
   0   6   1   76.84    7.98 
   0   6  -1   81.46    9.32 
   0   6   1   89.76    8.69 
   0   6  -1   74.18    7.01 
   0   6  -1   79.09    8.14 
   0   6  -1   78.49    6.03 
   0   6   1   84.62    7.15 
   0   6  -1   76.93    7.02 
   0   6  -1   92.27    7.39 
   0   6   1   86.21    7.71 
   0   6  -1   84.41    8.70 
   0   6  -1   83.37    5.93 
   0   6   1   81.05    7.02 
   0   6  -1   82.93    6.97 
   0   6   1   73.03    6.82 
   1  -6   1   15.19    3.03 
  -1  -6  -1   13.12    3.61 
  -1  -6  -1   14.30    3.97 
   1  -6   1   19.24    3.42 
  -1  -6  -1   14.17    3.08 
   1  -6   1   16.97    3.92 
   1  -6   1   17.48    5.10 
  -1  -6  -1   21.24    3.22 
   1  -6   1   17.65    4.82 
   1  -6   1   15.99    3.23 
  -1  -6  -1   22.08    3.31 
  -1  -6  -1   20.16    3.45 
  -1  -6  -1   18.13    3.18 
   1  -6   1   25.15    3.60 
  -1  -6  -1   17.05    3.99 
   1  -6   1   19.75    4.73 
   1  -6   1   13.02    4.20 
  -1  -6  -1   16.05    3.03 
   1   6   1   18.94    2.04 
   1   6   1   21.12    3.59 
   1   6   1   17.42    3.18 
   1   6   1   11.74    4.64 
   1   6   1   17.55    4.52 
   1   6   1   23.47    3.59 
   1   6   1   15.10    2.47 
   1   6   1   16.03    1.92 
  -1   6  -1   28.23    3.98 
  -1   6  -1   19.71    4.54 
  -1   6  -1   20.31    4.55 
   1   6   1   16.43    4.52 
   1   6   1   19.33    3.28 
  -1   6  -1   17.92    2.38 
  -1   6  -1   11.97    2.89 
   1   6   1    8.55    3.22 
  -1   6  -1   15.73    2.53 
   1   6   1   17.07    3.52 
   1   6   1   14.60    3.04 
  -1   6  -1   19.37    4.79 
  -1   6  -1   20.54    4.27 
  -1   6  -1   18.62    2.96 
   2  -6   1   63.78    8.63 
   2  -6   1   63.98    6.62 
  -2  -6  -1   68.61    6.45 
   2  -6   1   71.17    8.02 
   2  -6   1   57.48    8.20 
  -2  -6  -1   70.42    6.42 
  -2  -6  -1   69.08    7.76 
   2  -6   1   78.22    6.77 
   2  -6   1   77.42    8.69 
   2  -6   1   67.74    5.73 
  -2  -6  -1   72.38    6.59 
  -2  -6  -1   65.64    6.39 
  -2  -6  -1   81.08    6.72 
  -2  -6  -1   63.02    7.16 
  -2  -6  -1   72.91    6.32 
   2  -6   1   82.62    6.75 
   2  -6   1   70.14    6.50 
  -2  -6  -1   73.35    7.19 
  -2   6  -1   72.65    6.72 
  -2   6  -1   70.44    8.39 
   2   6   1   71.74    8.84 
  -2   6  -1   80.46    6.65 
  -2   6  -1   67.62    8.36 
   2   6   1   79.53    7.09 
   2   6   1   71.47    5.07 
   2   6   1   77.91    7.82 
   2   6   1   72.34    6.71 
   2   6   1   64.98    4.97 
  -2   6  -1   74.51    7.43 
   2   6   1   84.30    8.57 
  -2   6  -1   66.19    8.76 
   2   6   1   86.99    6.85 
   2   6   1   65.33    6.50 
   2   6   1   72.52    6.58 
  -2   6  -1   75.54    9.27 
   2   6   1   79.41    7.04 
  -2   6  -1   69.34    5.88 
  -2   6  -1   75.36    6.21 
  -2   6  -1   76.89    8.39 
   2   6   1   70.39    7.12 
  -3  -6  -1    8.12    2.92 
   3  -6   1    8.33    2.53 
   3  -6   1    3.63    3.52 
   3  -6   1    3.72    3.83 
   3  -6   1   15.09    4.45 
   3  -6   1    9.37    3.37 
  -3  -6  -1   11.71    2.61 
   3  -6   1    5.50    2.53 
  -3  -6  -1   10.34    2.86 
   3  -6   1    5.56    2.06 
   3  -6   1    9.09    2.75 
  -3  -6  -1    7.66    2.46 
  -3  -6  -1    6.86    2.42 
   3  -6   1   11.09    2.48 
  -3  -6  -1   11.61    2.74 
   3  -6   1    9.11    3.29 
  -3   6  -1    4.50    4.12 
  -3   6  -1    8.76    3.67 
   3   6   1    9.13    3.04 
  -3   6  -1    3.54    3.00 
   3   6   1    9.26    2.76 
   3   6   1    4.84    2.29 
  -3   6  -1    0.39    3.32 
   3   6   1   10.11    2.47 
  -3   6  -1    8.92    3.51 
   3   6   1   10.98    3.86 
  -3   6  -1    6.74    2.48 
  -3   6  -1    9.71    2.66 
   3   6   1   11.47    2.80 
  -3   6  -1    9.43    2.48 
   3   6   1    2.80    2.38 
  -3   6  -1    7.02    2.46 
  -3   6  -1    7.36    2.19 
  -3   6  -1    4.57    3.46 
   3   6   1    8.03    2.85 
   3   6   1    7.86    2.56 
   4  -6   1   15.88    3.32 
  -4  -6  -1   18.12    3.17 
   4  -6   1   25.16    4.07 
  -4  -6  -1   11.34    2.92 
  -4  -6  -1   17.20    3.54 
  -4  -6  -1   19.38    3.17 
  -4  -6  -1   20.86    3.33 
   4  -6   1   25.55    5.17 
   4  -6   1   22.08    3.86 
  -4  -6  -1   13.33    3.54 
   4  -6   1   17.77    4.12 
  -4  -6  -1   17.68    3.56 
   4  -6   1   10.84    3.64 
   4  -6   1   18.60    3.38 
  -4  -6  -1   16.90    3.72 
   4  -6   1   13.26    3.85 
   4  -6   1   15.53    4.35 
   4   6   1   14.32    3.38 
  -4   6  -1   17.01    4.22 
   4   6   1   17.37    3.41 
   4   6   1   21.03    3.89 
  -4   6  -1   19.74    3.54 
  -4   6  -1   18.88    3.20 
  -4   6  -1   10.59    4.24 
  -4   6  -1   22.50    5.00 
   4   6   1   26.44    3.86 
  -4   6  -1   15.04    3.31 
  -4   6  -1   18.99    5.33 
   4   6   1   15.48    2.37 
   4   6   1   15.02    2.85 
  -4   6  -1   12.86    4.98 
   4   6   1   20.79    3.46 
   4   6   1   27.00    4.38 
   4   6   1   17.84    3.39 
  -4   6  -1   15.74    3.43 
   4   6   1   19.41    3.14 
   4   6   1   24.54    3.70 
  -4   6  -1   19.04    4.21 
  -5  -6  -1   39.40    5.63 
  -5  -6  -1   36.20    4.56 
   5  -6   1   30.50    4.88 
  -5  -6  -1   38.82    4.60 
  -5  -6  -1   35.32    4.90 
  -5  -6  -1   29.41    4.69 
  -5  -6  -1   38.69    4.65 
  -5  -6  -1   27.83    4.86 
   5  -6   1   31.55    4.70 
   5  -6   1   34.81    4.82 
   5  -6   1   33.51    5.61 
   5  -6   1   40.31    6.40 
   5  -6   1   45.24    5.86 
  -5  -6  -1   43.24    4.87 
   5  -6   1   37.37    5.17 
   5  -6   1   32.52    5.44 
  -5  -6  -1   43.71    5.33 
  -5  -6  -1   38.81    4.63 
   5  -6   1   38.79    4.95 
   5   6   1   41.42    4.37 
   5   6   1   35.32    4.95 
   5   6   1   38.08    4.84 
  -5   6  -1   39.06    5.30 
   5   6   1   40.83    6.11 
  -5   6  -1   37.79    4.61 
  -5   6  -1   35.87    7.09 
   5   6   1   32.33    5.13 
  -5   6  -1   33.12    5.09 
  -5   6  -1   43.21    5.35 
   5   6   1   53.78    5.40 
  -5   6  -1   38.14    5.80 
  -5   6  -1   37.60    6.70 
   5   6   1   38.34    4.41 
  -5   6  -1   24.88    5.12 
   5   6   1   41.08    5.73 
  -5   6  -1   35.37    6.01 
  -5   6  -1   40.55    7.18 
  -5   6  -1   33.11    4.70 
   5   6   1   38.21    4.92 
   5   6   1   34.20    4.80 
   5   6   1   47.38    5.64 
  -6  -6  -1   60.18    7.14 
   6  -6   1   61.41    7.06 
   6  -6   1   56.10    7.21 
   6  -6   1   50.68    7.01 
  -6  -6  -1   66.85    6.09 
   6  -6   1   56.16    7.11 
   6  -6   1   73.85    8.10 
  -6  -6  -1   69.25    7.24 
  -6  -6  -1   68.01    6.98 
  -6  -6  -1   66.40    6.36 
   6  -6   1   73.14    7.96 
   6  -6   1   66.48    7.93 
  -6  -6  -1   60.73    6.61 
  -6  -6  -1   64.72    7.56 
   6  -6   1   73.53    8.17 
  -6  -6  -1   61.77    6.87 
  -6  -6  -1   69.15    7.79 
   6  -6   1   72.24    6.80 
   6  -6   1   64.03    7.11 
  -6   6  -1   66.34    7.18 
  -6   6  -1   44.90    6.74 
   6   6   1   73.36    6.77 
  -6   6  -1   58.32    8.09 
  -6   6  -1   80.57    8.50 
   6   6   1   70.32    7.11 
   6   6   1   60.27    6.76 
  -6   6  -1   60.69    9.19 
  -6   6  -1   52.98    8.62 
  -6   6  -1   56.45    7.50 
   6   6   1   62.99    6.77 
   6   6   1   62.84    5.95 
   6   6   1   62.24    6.65 
   6   6   1   76.45    5.99 
   6   6   1   64.70    7.04 
  -6   6  -1   64.79    9.33 
  -6   6  -1   70.60    7.71 
  -6   6  -1   66.88    6.82 
   6   6   1   59.79    7.33 
  -6   6  -1   71.35    6.98 
   7  -6   1   38.63    5.63 
   7  -6   1   26.98    5.20 
   7  -6   1   53.50    6.34 
  -7  -6  -1   50.83    5.92 
  -7  -6  -1   45.03    6.44 
  -7  -6  -1   46.82    5.56 
  -7  -6  -1   44.24    5.56 
   7  -6   1   43.85    6.28 
  -7  -6  -1   55.57    6.60 
  -7  -6  -1   48.96    6.67 
   7  -6   1   51.53    6.03 
  -7  -6  -1   46.83    5.90 
   7  -6   1   44.25    6.76 
   7  -6   1   41.75    5.96 
  -7  -6  -1   55.58    6.65 
   7  -6   1   44.15    6.54 
   7  -6   1   42.50    6.39 
   7  -6   1   50.78    6.63 
  -7  -6  -1   47.04    5.70 
   7   6   1   46.84    5.07 
  -7   6  -1   46.13    5.76 
   7   6   1   47.25    5.82 
  -7   6  -1   38.63    7.58 
   7   6   1   49.73    6.63 
   7   6   1   37.58    6.64 
   7   6   1   42.72    5.83 
  -7   6  -1   41.69    6.96 
  -7   6  -1   30.53    5.88 
   7   6   1   43.86    5.14 
  -7   6  -1   40.63    6.09 
  -7   6  -1   41.72    6.58 
  -7   6  -1   37.68    6.28 
  -7   6  -1   40.82    6.29 
   7   6   1   34.54    5.21 
  -7   6  -1   47.44    8.40 
   7   6   1   44.39    5.63 
  -7   6  -1   50.72    5.96 
  -7   6  -1   42.32    7.72 
  -8  -6  -1  114.03    9.46 
  -8  -6  -1  106.27    9.89 
  -8  -6  -1  115.35   10.47 
   8  -6   1  108.74   15.36 
   8  -6   1   99.92   10.93 
   8  -6   1  114.63   10.17 
   8  -6   1   97.34    9.70 
   8  -6   1   75.38    9.65 
  -8  -6  -1   99.41    9.49 
  -8  -6  -1   96.21    9.08 
  -8  -6  -1   85.61   10.17 
   8  -6   1   86.76    9.69 
  -8  -6  -1  121.67    9.59 
   8  -6   1   90.70    9.58 
  -8  -6  -1  108.54   10.06 
   8  -6   1  118.14   10.48 
  -8   6  -1   96.66   12.33 
   8   6   1   90.86   10.20 
  -8   6  -1  109.30   10.24 
  -8   6  -1   97.47   10.82 
   8   6   1  101.15    9.19 
   8   6   1   83.79    9.71 
   8   6   1  109.61    9.43 
  -8   6  -1   96.29   10.48 
  -8   6  -1   95.43    9.84 
  -8   6  -1  114.87   11.29 
   8   6   1   89.45    8.61 
  -8   6  -1   88.81   11.19 
   8   6   1   93.27    9.83 
  -8   6  -1   95.91   10.74 
  -8   6  -1   98.09    9.56 
  -8   6  -1  102.43   12.38 
  -7  -7   1   10.85    3.62 
   7  -7  -1   28.01    5.73 
   7  -7  -1   12.98    4.00 
  -7  -7   1   19.75    4.59 
   7  -7  -1   15.70    4.08 
  -7  -7   1   22.28    4.65 
   7  -7  -1   14.98    4.58 
   7  -7  -1   19.71    5.50 
  -7  -7   1   15.05    4.42 
   7  -7  -1   13.54    3.98 
  -7  -7   1   17.45    3.78 
   7  -7  -1   13.89    4.14 
   7  -7  -1   14.71    4.49 
   7  -7  -1   10.01    3.69 
  -7  -7   1    8.74    3.69 
   7  -7  -1   27.53    5.89 
   7   7  -1   11.71    3.43 
   7   7  -1   16.83    3.90 
  -7   7   1   17.30    6.52 
   7   7  -1    9.20    4.01 
  -7   7   1    7.07    5.27 
  -7   7   1   16.29    4.77 
  -7   7   1   22.53    5.10 
   7   7  -1    9.97    4.14 
  -7   7   1   13.88    4.72 
  -7   7   1   14.41    4.14 
  -7   7   1   19.12    5.47 
  -7   7   1   14.09    5.28 
   7   7  -1    7.78    2.97 
  -7   7   1   13.86    5.98 
  -7   7   1   23.21    5.55 
  -7   7   1   23.94    4.39 
  -6  -7   1   46.79    6.59 
   6  -7  -1   59.08    8.28 
  -6  -7   1   67.73    7.63 
  -6  -7   1   64.42    6.46 
  -6  -7   1   74.98    8.16 
   6  -7  -1   55.54    7.31 
   6  -7  -1   49.49    6.51 
   6  -7  -1   38.20    6.41 
   6  -7  -1   51.05    6.92 
   6  -7  -1   50.86    6.28 
  -6  -7   1   45.05    6.25 
   6  -7  -1   58.71    7.91 
   6  -7  -1   51.16    6.41 
   6  -7  -1   69.33    8.55 
  -6  -7   1   50.71    6.72 
  -6   7   1   48.94    7.44 
   6   7  -1   49.97    5.88 
  -6   7   1   51.93    8.12 
  -6   7   1   51.46    6.69 
   6   7  -1   51.30    6.28 
   6   7  -1   52.11    6.23 
  -6   7   1   29.88    7.92 
  -6   7   1   50.61    9.13 
   6   7  -1   50.40    6.34 
  -6   7   1   68.51    6.99 
   6   7  -1   59.96    7.69 
  -6   7   1   62.16    9.55 
  -6   7   1   49.77    8.06 
  -6   7   1   61.13    6.67 
  -6   7   1   40.03    6.41 
   5  -7  -1   82.40    8.26 
  -5  -7   1   77.29    7.17 
   5  -7  -1   88.72    7.54 
   5  -7  -1   78.46    9.20 
   5  -7  -1   90.48   10.45 
   5  -7  -1   96.70   10.66 
  -5  -7   1   84.87    8.46 
   5  -7  -1   68.18    8.21 
   5  -7  -1   77.85    9.18 
   5  -7  -1   63.76    7.79 
  -5  -7   1   62.53    7.72 
   5  -7  -1   87.56    7.93 
  -5  -7   1   69.68    6.92 
  -5  -7   1   68.87    8.23 
  -5  -7   1   74.21    8.51 
   5   7  -1   71.77    7.07 
  -5   7   1   47.87   11.69 
  -5   7   1   60.60    8.75 
   5   7  -1   73.81    7.08 
   5   7  -1   91.08    7.80 
  -5   7   1   72.35    7.37 
  -5   7   1   77.97    9.76 
  -5   7   1   51.62    9.69 
  -5   7   1   80.83    8.00 
  -5   7   1   93.83    7.99 
   5   7  -1   81.76    7.89 
   5   7  -1   71.41    6.84 
   5   7  -1   80.79    7.77 
  -5   7   1   68.03    9.44 
  -5   7   1   41.82    8.96 
  -5   7   1   58.97   10.29 
   5   7  -1   79.43    8.61 
  -5   7   1   79.74    7.80 
   5   7  -1   75.72    7.53 
   4  -7  -1  119.59   10.57 
  -4  -7   1  135.86    9.92 
  -4  -7   1  131.50   10.24 
   4  -7  -1   92.30   12.64 
   4  -7  -1  117.84   10.73 
   4  -7  -1  111.42   12.36 
   4  -7  -1  131.00   10.83 
   4  -7  -1  120.70   10.58 
   4  -7  -1  127.47    9.87 
  -4  -7   1  113.10   10.56 
   4  -7  -1  115.51   13.08 
  -4  -7   1  121.88   11.03 
   4  -7  -1  115.07   13.09 
  -4  -7   1  121.02   10.97 
  -4  -7   1  126.41   10.15 
  -4  -7   1  138.80   10.90 
   4  -7  -1  152.89   11.36 
  -4   7   1  119.14   10.39 
   4   7  -1  120.08   10.10 
  -4   7   1  123.81   10.47 
   4   7  -1  138.21   10.00 
  -4   7   1  159.17   12.99 
   4   7  -1  132.73    9.38 
   4   7  -1  122.74   10.61 
  -4   7   1   90.63   12.72 
  -4   7   1  122.77   10.12 
  -4   7   1   71.41   12.35 
  -4   7   1  132.80   10.41 
   4   7  -1  121.32   10.31 
  -4   7   1  132.02   10.47 
   4   7  -1  117.13    9.99 
   4   7  -1  123.69   10.90 
  -4   7   1   93.89   12.39 
   4   7  -1  128.36    9.95 
   4   7  -1  136.83   10.60 
   4   7  -1  136.99   10.31 
   3  -7  -1   19.78    4.49 
  -3  -7   1   25.61    3.97 
  -3  -7   1   18.15    3.57 
   3  -7  -1   16.57    5.40 
  -3  -7   1   25.16    4.58 
   3  -7  -1   32.61    4.63 
   3  -7  -1   15.80    5.48 
   3  -7  -1   22.25    4.18 
   3  -7  -1   22.40    5.59 
   3  -7  -1   26.09    4.32 
   3  -7  -1   21.05    3.09 
  -3  -7   1   28.60    4.33 
  -3  -7   1   25.89    4.88 
   3  -7  -1   20.15    3.00 
  -3  -7   1   31.93    3.83 
   3  -7  -1   21.93    4.95 
  -3  -7   1   24.17    4.48 
   3  -7  -1   26.89    4.60 
  -3  -7   1   20.16    4.12 
  -3   7   1   21.70    7.18 
   3   7  -1   28.83    4.62 
   3   7  -1   19.63    3.72 
  -3   7   1   28.97    3.89 
   3   7  -1   18.29    3.86 
   3   7  -1   19.77    4.99 
  -3   7   1   17.74    5.23 
  -3   7   1   20.36    3.82 
  -3   7   1   19.18    5.21 
  -3   7   1   25.34    4.04 
   3   7  -1   26.66    3.53 
  -3   7   1   15.59    3.73 
   3   7  -1   24.90    4.22 
   3   7  -1   27.55    4.69 
  -3   7   1   24.35    5.21 
   3   7  -1   25.00    3.85 
  -3   7   1   23.95    5.83 
  -3   7   1   20.32    5.21 
   3   7  -1   24.77    3.94 
   3   7  -1   24.67    3.64 
   2  -7  -1   35.72    5.10 
   2  -7  -1   30.79    4.65 
  -2  -7   1   44.62    5.01 
  -2  -7   1   27.06    5.12 
   2  -7  -1   32.19    4.42 
   2  -7  -1   33.02    6.35 
  -2  -7   1   26.80    4.02 
   2  -7  -1   35.35    5.65 
  -2  -7   1   34.41    4.92 
  -2  -7   1   33.97    4.66 
   2  -7  -1   33.28    6.51 
  -2  -7   1   34.66    4.21 
   2  -7  -1   29.16    4.78 
  -2  -7   1   27.75    5.29 
  -2  -7   1   35.89    4.81 
   2  -7  -1   39.97    5.24 
   2  -7  -1   29.92    3.36 
   2  -7  -1   29.85    4.71 
  -2  -7   1   33.04    5.82 
   2   7  -1   47.16    6.86 
  -2   7   1   38.94    6.02 
  -2   7   1   28.72    4.77 
   2   7  -1   31.50    4.48 
  -2   7   1   35.26    5.63 
  -2   7   1   36.14    7.85 
   2   7  -1   20.88    4.18 
   2   7  -1   29.40    5.24 
  -2   7   1   29.52    4.45 
   2   7  -1   37.95    4.75 
  -2   7   1   40.09    4.30 
   2   7  -1   26.88    4.34 
   2   7  -1   31.58    4.23 
  -2   7   1   28.99    4.05 
  -2   7   1   33.81    6.06 
   2   7  -1   34.70    4.90 
   2   7  -1   30.88    4.35 
  -2   7   1   35.71    6.63 
   2   7  -1   28.83    3.10 
   1  -7  -1   15.34    3.19 
   1  -7  -1   28.26    5.81 
   1  -7  -1   17.91    4.44 
  -1  -7   1   27.32    4.98 
  -1  -7   1   19.34    3.43 
  -1  -7   1   16.61    4.61 
  -1  -7   1   22.66    4.80 
  -1  -7   1   18.73    3.48 
   1  -7  -1   17.00    5.34 
  -1  -7   1   12.75    3.25 
  -1  -7   1   26.72    5.23 
   1  -7  -1   17.87    3.88 
   1  -7  -1   22.82    4.26 
   1  -7  -1   26.84    5.21 
   1  -7  -1   28.15    4.06 
   1  -7  -1   19.39    5.18 
   1  -7  -1   19.84    3.81 
  -1  -7   1   20.47    3.19 
  -1  -7   1   14.97    3.51 
   1  -7  -1   14.03    3.40 
   1  -7  -1   17.00    4.22 
  -1   7   1   13.52    4.12 
  -1   7   1   20.27    2.98 
   1   7  -1   22.18    3.37 
  -1   7   1   23.31    3.75 
   1   7  -1   23.36    3.80 
   1   7  -1   18.38    3.62 
  -1   7   1   26.41    4.60 
   1   7  -1   18.96    5.30 
   1   7  -1   17.06    2.05 
  -1   7   1   16.73    4.52 
  -1   7   1   21.55    3.04 
  -1   7   1   15.67    3.56 
   1   7  -1   19.93    3.77 
   1   7  -1   19.16    5.15 
  -1   7   1   21.20    6.30 
  -1   7   1   30.06    3.96 
   1   7  -1   18.62    3.50 
   1   7  -1   12.71    4.89 
   1   7  -1   15.78    4.35 
   1   7  -1   17.25    3.55 
   1   7  -1   16.78    3.46 
  -1   7   1   27.49    5.91 
   1   7  -1   15.26    2.58 
  -1   7   1   16.50    3.53 
   1   7  -1   15.81    3.51 
   0  -7  -1   63.83    8.48 
   0  -7   1   50.61    8.42 
   0  -7  -1   59.67    8.40 
   0  -7  -1   63.77    6.97 
   0  -7   1   69.24    6.34 
   0  -7  -1   46.94    8.35 
   0  -7  -1   73.07    6.47 
   0  -7  -1   53.89    6.26 
   0  -7  -1   62.13    7.74 
   0  -7   1   56.58    8.15 
   0  -7  -1   61.66    6.62 
   0  -7  -1   55.09    7.42 
   0  -7  -1   65.01    6.27 
   0  -7  -1   60.68    7.20 
   0  -7   1   68.74    6.94 
   0  -7   1   59.46    7.42 
   0  -7   1   54.39    6.54 
   0  -7   1   70.54    7.85 
   0  -7   1   47.46    7.64 
   0  -7   1   61.83    7.79 
   0   7  -1   55.79    6.13 
   0   7  -1   72.61    6.01 
   0   7  -1   57.28    6.18 
   0   7  -1   61.11    7.12 
   0   7   1   76.12    6.27 
   0   7   1   62.51    8.64 
   0   7   1   61.30    6.33 
   0   7  -1   55.70    5.03 
   0   7   1   56.10    5.15 
   0   7  -1   56.22    8.24 
   0   7   1   54.49    6.29 
   0   7  -1   61.76    5.71 
   0   7  -1   59.63    6.53 
   0   7   1   42.62    6.15 
   0   7  -1   72.32    8.76 
   0   7   1   66.84    7.34 
   0   7  -1   56.40    6.22 
   0   7   1   76.48    6.94 
   0   7   1   69.45    8.37 
   0   7   1   77.89    9.75 
   0   7  -1   59.08    4.87 
   0   7  -1   48.20    6.15 
   0   7  -1   60.57    8.34 
   0   7  -1   73.50    7.04 
   0   7   1   63.43    6.62 
   0   7   1   68.61    7.38 
   1  -7   1   87.83    7.61 
   1  -7   1   79.98    9.92 
   1  -7   1   80.81    8.15 
  -1  -7  -1   80.99    7.38 
  -1  -7  -1   89.79    7.61 
   1  -7   1   74.76    7.50 
  -1  -7  -1   77.34    8.04 
   1  -7   1   78.64    7.64 
   1  -7   1   72.97    9.49 
  -1  -7  -1   81.22    9.08 
  -1  -7  -1   81.87    7.51 
  -1  -7  -1   65.59    8.38 
   1  -7   1   84.83    8.96 
   1  -7   1   94.31    9.30 
  -1  -7  -1   88.15    7.56 
  -1  -7  -1   78.89    7.66 
  -1  -7  -1   61.93    8.75 
  -1  -7  -1   87.55    7.62 
   1  -7   1   82.34    9.88 
  -1   7  -1   81.81    6.28 
   1   7   1   82.81    7.98 
   1   7   1   73.60   10.05 
   1   7   1   80.56    7.49 
  -1   7  -1   88.87    6.70 
   1   7   1   89.86   11.25 
   1   7   1   90.64    7.90 
  -1   7  -1   77.56    7.32 
   1   7   1   69.02    6.39 
   1   7   1   75.96   10.10 
  -1   7  -1   74.86    7.44 
  -1   7  -1   82.14    7.71 
   1   7   1   73.04    5.95 
  -1   7  -1   96.29    9.28 
   1   7   1   76.88    7.71 
   1   7   1   63.90    7.54 
  -1   7  -1  104.51    9.16 
   1   7   1   63.96    8.35 
  -1   7  -1   91.85    9.27 
   1   7   1   87.71    7.67 
  -2  -7  -1  183.95   13.47 
  -2  -7  -1  178.13   14.74 
   2  -7   1  166.62   12.41 
   2  -7   1  160.04   15.14 
   2  -7   1  160.32   13.53 
  -2  -7  -1  176.39   13.17 
  -2  -7  -1  165.83   14.21 
  -2  -7  -1  182.59   14.50 
  -2  -7  -1  171.48   13.37 
  -2  -7  -1  177.02   13.23 
   2  -7   1  174.81   13.51 
   2  -7   1  178.67   13.79 
   2  -7   1  183.59   14.88 
  -2  -7  -1  157.37   13.16 
   2  -7   1  179.23   14.62 
   2  -7   1  187.02   13.74 
  -2  -7  -1  187.59   13.39 
   2  -7   1  188.36   15.77 
   2   7   1  146.14   14.06 
   2   7   1  161.81   13.42 
  -2   7  -1  178.42   12.51 
  -2   7  -1  203.68   13.93 
  -2   7  -1  192.16   15.09 
  -2   7  -1  177.07   13.38 
  -2   7  -1  173.83   12.77 
  -2   7  -1  194.32   15.43 
   2   7   1  182.42   15.66 
   2   7   1  169.08   15.59 
   2   7   1  176.43   13.34 
  -2   7  -1  173.85   13.49 
   2   7   1  173.26   13.46 
   2   7   1  171.04   13.37 
   2   7   1  146.86   13.44 
   2   7   1  181.08   13.69 
  -2   7  -1  181.76   14.86 
   2   7   1  178.59   13.86 
  -2   7  -1  154.70   15.37 
   3  -7   1   42.55    6.58 
   3  -7   1   36.17    5.07 
   3  -7   1   38.17    6.42 
  -3  -7  -1   38.75    5.16 
  -3  -7  -1   42.45    5.82 
  -3  -7  -1   34.78    5.74 
  -3  -7  -1   40.11    4.91 
  -3  -7  -1   35.41    4.87 
   3  -7   1   28.22    4.14 
   3  -7   1   35.21    6.38 
   3  -7   1   41.01    5.44 
   3  -7   1   23.20    5.85 
  -3  -7  -1   30.33    4.80 
   3  -7   1   41.91    5.30 
   3  -7   1   26.66    6.36 
   3  -7   1   31.96    4.89 
  -3   7  -1   26.86    5.32 
  -3   7  -1   28.77    5.97 
  -3   7  -1   37.68    7.16 
   3   7   1   41.12    5.70 
  -3   7  -1   41.92    5.19 
  -3   7  -1   36.90    6.34 
   3   7   1   44.39    5.48 
   3   7   1   42.29    6.94 
  -3   7  -1   31.23    4.55 
   3   7   1   37.11    4.99 
  -3   7  -1   42.17    4.72 
   3   7   1   38.34    5.19 
   3   7   1   43.06    6.14 
   3   7   1   45.27    5.87 
  -3   7  -1   50.29    7.26 
  -3   7  -1   34.07    4.36 
   3   7   1   36.25    5.02 
  -3   7  -1   28.85    4.65 
   3   7   1   42.76    5.03 
  -3   7  -1   37.29    7.61 
   4  -7   1   57.15    8.81 
   4  -7   1   65.70    8.27 
  -4  -7  -1   74.02    8.24 
  -4  -7  -1   74.55    7.81 
   4  -7   1   61.85    7.43 
  -4  -7  -1   72.06    7.55 
  -4  -7  -1   63.64    6.87 
   4  -7   1   69.50    7.60 
  -4  -7  -1   65.79    6.89 
  -4  -7  -1   65.17    7.35 
  -4  -7  -1   52.99    6.46 
   4  -7   1   78.45    8.80 
   4  -7   1   59.43    8.52 
   4  -7   1   83.52    7.35 
   4  -7   1   69.63    8.66 
   4  -7   1   75.57    7.42 
  -4   7  -1   52.85    8.97 
   4   7   1   74.98    7.27 
  -4   7  -1   61.20    6.80 
   4   7   1   72.92    7.40 
   4   7   1   71.82    6.34 
   4   7   1   89.77    8.15 
  -4   7  -1   49.11    8.34 
  -4   7  -1   34.08    8.02 
  -4   7  -1   70.28    6.66 
  -4   7  -1   47.29    7.65 
   4   7   1   74.37    7.90 
   4   7   1   63.06    7.64 
   4   7   1   68.85    7.88 
  -4   7  -1   68.64    7.11 
  -4   7  -1   62.24    8.58 
   4   7   1   69.56    7.39 
   4   7   1   70.65    7.38 
  -4   7  -1   73.45    6.89 
   5  -7   1    7.34    2.98 
   5  -7   1    3.86    3.38 
   5  -7   1   10.77    4.34 
  -5  -7  -1    4.71    2.74 
   5  -7   1    1.74    3.49 
  -5  -7  -1    4.89    2.93 
   5  -7   1   10.54    3.53 
   5  -7   1    3.03    2.64 
   5  -7   1    6.63    2.82 
  -5  -7  -1    1.81    2.26 
  -5  -7  -1    4.32    2.34 
  -5  -7  -1   14.27    3.92 
  -5  -7  -1    2.95    2.27 
  -5  -7  -1    9.51    3.21 
   5  -7   1   -4.98    3.02 
  -5   7  -1    9.30    4.06 
  -5   7  -1   11.05    4.33 
  -5   7  -1    2.44    4.23 
   5   7   1    6.97    2.99 
  -5   7  -1    7.86    3.02 
   5   7   1    7.11    2.80 
   5   7   1    8.29    2.54 
  -5   7  -1   -1.78    3.94 
  -5   7  -1    4.01    3.23 
   5   7   1    6.99    3.28 
  -5   7  -1    3.36    2.82 
  -5   7  -1    4.84    4.93 
   5   7   1    2.76    2.74 
  -5   7  -1    4.14    4.38 
   5   7   1    8.93    3.40 
  -5   7  -1    0.61    6.81 
   5   7   1    5.29    2.71 
  -5   7  -1    5.59    3.40 
   5   7   1   15.03    3.50 
   5   7   1    9.90    2.55 
  -5   7  -1    4.68    2.91 
  -6  -7  -1    0.25    2.55 
   6  -7   1   -1.25    2.35 
   6  -7   1   -1.78    3.05 
  -6  -7  -1    0.26    2.83 
   6  -7   1    0.03    2.88 
   6  -7   1   -3.13    3.83 
  -6  -7  -1    3.67    2.85 
   6  -7   1   -4.59    3.28 
   6  -7   1    1.08    2.51 
  -6  -7  -1    4.25    3.00 
   6  -7   1    6.13    3.53 
   6  -7   1    2.54    2.78 
   6  -7   1   -2.36    2.44 
  -6  -7  -1   -1.15    2.26 
  -6  -7  -1    2.46    2.30 
   6  -7   1    5.23    3.78 
  -6  -7  -1    0.35    2.26 
  -6   7  -1   -2.85    3.02 
   6   7   1   -0.30    2.38 
  -6   7  -1   -1.41    3.22 
  -6   7  -1   -0.40    3.44 
   6   7   1   -0.94    2.15 
  -6   7  -1   -2.47    4.16 
  -6   7  -1   -4.90    2.92 
   6   7   1   -1.53    2.39 
  -6   7  -1    2.03    4.76 
  -6   7  -1    0.06    3.33 
   6   7   1    2.39    2.29 
  -6   7  -1    6.45    2.93 
  -6   7  -1   -1.78    2.61 
   6   7   1   -1.06    2.33 
  -6   7  -1   -0.91    2.84 
  -6   7  -1    4.78    4.84 
   6   7   1   -0.64    2.56 
  -7  -7  -1    0.15    2.82 
   7  -7   1   -2.99    2.79 
  -7  -7  -1    1.36    2.80 
   7  -7   1   -0.17    2.96 
   7  -7   1   -1.66    2.85 
   7  -7   1   11.68    4.67 
   7  -7   1    4.75    3.39 
   7  -7   1   -1.92    3.71 
  -7  -7  -1   10.92    3.26 
  -7  -7  -1    0.50    2.67 
   7  -7   1    1.54    2.72 
  -7  -7  -1    1.78    2.97 
  -7  -7  -1    0.71    3.08 
   7  -7   1    1.86    3.36 
   7  -7   1   -2.02    2.78 
  -7   7  -1    7.15    3.15 
   7   7   1    0.06    2.42 
  -7   7  -1   -3.09    4.51 
  -7   7  -1   -0.59    3.57 
   7   7   1   -4.95    2.57 
  -7   7  -1    6.55    5.32 
  -7   7  -1   -2.03    3.85 
  -7   7  -1   -1.47    3.15 
  -7   7  -1   -4.96    3.18 
   7   7   1    1.85    2.53 
  -7   7  -1   -3.76    3.25 
  -7   7  -1    1.77    5.19 
  -7   7  -1    9.92    4.40 
  -7   7  -1    2.26    3.90 
   7   7   1   -2.84    1.94 
   7   7   1    1.28    2.84 
   6  -8  -1    4.08    4.65 
  -6  -8   1    3.24    3.48 
   6  -8  -1    7.40    4.70 
   6  -8  -1    9.29    5.45 
   6  -8  -1    5.69    3.70 
   6  -8  -1   -1.35    4.50 
  -6  -8   1    1.73    2.96 
   6  -8  -1   -2.79    2.95 
   6  -8  -1   -3.31    3.06 
  -6  -8   1    3.79    3.30 
   6  -8  -1    5.81    3.29 
  -6  -8   1    0.65    3.33 
   6  -8  -1    9.98    4.53 
   6   8  -1    2.58    2.80 
   6   8  -1   -2.18    2.58 
   6   8  -1    1.34    3.33 
  -6   8   1    7.07    3.68 
  -6   8   1   -2.31    3.21 
  -6   8   1    4.50    5.44 
  -6   8   1    0.86    4.02 
  -6   8   1    6.74    5.49 
   6   8  -1    3.64    2.72 
  -6   8   1   -3.28    3.88 
  -6   8   1   -2.45    3.39 
  -6   8   1    8.35    5.89 
  -6   8   1   -4.93    3.20 
  -6   8   1    2.66    4.50 
  -6   8   1   -0.71    2.84 
   5  -8  -1   16.79    6.02 
  -5  -8   1   24.45    4.61 
   5  -8  -1   33.32    7.42 
   5  -8  -1   37.00    7.26 
   5  -8  -1   36.89    5.70 
  -5  -8   1   27.91    5.29 
   5  -8  -1   25.18    5.27 
   5  -8  -1   25.50    4.82 
  -5  -8   1   26.54    5.51 
   5  -8  -1   31.53    5.69 
  -5  -8   1   22.32    4.97 
  -5  -8   1   28.84    5.32 
   5  -8  -1   17.75    6.16 
  -5   8   1   23.26    4.69 
   5   8  -1   29.20    4.31 
  -5   8   1   17.43    5.85 
  -5   8   1   32.67    4.91 
  -5   8   1   40.18    5.53 
   5   8  -1   25.29    5.57 
  -5   8   1   23.83    4.85 
   5   8  -1   34.53    5.10 
  -5   8   1   29.01    7.10 
  -5   8   1   13.78    5.22 
  -5   8   1   20.65    6.19 
  -5   8   1   27.58    7.27 
   5   8  -1   25.53    4.38 
   5   8  -1   29.16    4.63 
   5   8  -1   36.12    5.69 
  -4  -8   1    1.11    2.66 
   4  -8  -1    8.07    3.52 
   4  -8  -1    5.11    4.41 
  -4  -8   1    5.76    3.68 
  -4  -8   1    7.17    3.11 
  -4  -8   1    4.68    3.21 
  -4  -8   1    9.80    4.02 
   4  -8  -1    8.18    5.27 
  -4  -8   1    5.33    2.98 
   4  -8  -1    6.01    3.18 
   4  -8  -1   11.75    3.73 
   4  -8  -1    0.03    4.08 
  -4  -8   1   10.06    3.86 
   4  -8  -1    6.09    3.48 
   4  -8  -1    3.82    4.86 
  -4   8   1    6.01    4.33 
   4   8  -1    6.58    2.82 
  -4   8   1    8.29    4.99 
   4   8  -1    4.98    4.85 
  -4   8   1    1.74    3.14 
  -4   8   1   12.30    3.55 
  -4   8   1    7.04    3.88 
  -4   8   1   10.66    6.84 
  -4   8   1    4.53    3.13 
   4   8  -1    5.63    3.12 
   4   8  -1    2.98    2.60 
  -4   8   1   13.97    5.14 
  -4   8   1    8.73    3.45 
   4   8  -1    7.14    3.50 
   4   8  -1    5.27    3.10 
   4   8  -1    1.90    3.01 
   4   8  -1    5.91    2.85 
   4   8  -1    7.38    3.02 
  -4   8   1    6.14    4.12 
  -4   8   1    7.44    3.01 
  -3  -8   1   57.87    6.86 
  -3  -8   1   46.70    7.43 
  -3  -8   1   50.01    6.22 
   3  -8  -1   42.46    6.51 
  -3  -8   1   59.32    7.15 
   3  -8  -1   47.11    8.49 
  -3  -8   1   49.21    6.38 
  -3  -8   1   55.90    7.74 
   3  -8  -1   54.31    7.85 
  -3  -8   1   56.15    7.91 
  -3  -8   1   66.78    6.81 
   3  -8  -1   58.38    8.25 
   3  -8  -1   47.83    8.13 
   3  -8  -1   61.29    6.80 
   3  -8  -1   44.34    6.61 
   3  -8  -1   49.06    7.10 
  -3   8   1   63.27    9.48 
  -3   8   1   51.12    6.48 
  -3   8   1   52.93    7.08 
  -3   8   1   43.24    6.30 
   3   8  -1   50.93    6.47 
  -3   8   1   57.51   10.52 
   3   8  -1   58.26    8.51 
  -3   8   1   54.64    6.15 
   3   8  -1   55.92    6.46 
   3   8  -1   45.38    6.47 
   3   8  -1   42.15    6.88 
   3   8  -1   62.41    6.78 
   3   8  -1   56.52    6.47 
  -3   8   1   60.51    8.39 
   3   8  -1   46.50    6.15 
   3   8  -1   54.92    6.99 
   3   8  -1   56.38    6.18 
  -3   8   1   58.12    6.01 
  -3   8   1   64.49    8.67 
   2  -8  -1   -1.15    2.54 
   2  -8  -1    6.07    3.58 
  -2  -8   1    2.15    3.64 
  -2  -8   1    0.28    2.10 
  -2  -8   1    3.97    2.33 
  -2  -8   1    2.72    2.41 
  -2  -8   1   -0.47    3.06 
  -2  -8   1    0.97    2.13 
   2  -8  -1   -1.91    2.72 
   2  -8  -1    0.85    2.25 
  -2  -8   1    1.57    2.90 
  -2  -8   1    3.36    3.73 
  -2  -8   1   -0.86    2.37 
   2  -8  -1   -3.71    3.02 
   2  -8  -1   -2.62    2.12 
  -2  -8   1    5.12    3.88 
   2  -8  -1   -0.80    3.80 
   2  -8  -1   -6.06    2.86 
   2  -8  -1    1.76    2.42 
   2   8  -1    4.02    2.52 
  -2   8   1    1.09    2.52 
  -2   8   1    0.18    2.94 
  -2   8   1    1.61    3.56 
   2   8  -1    2.23    2.52 
  -2   8   1    5.30    3.11 
  -2   8   1    0.23    2.19 
  -2   8   1    1.41    3.36 
   2   8  -1   -2.18    3.21 
  -2   8   1    3.73    2.91 
   2   8  -1   -0.48    2.54 
  -2   8   1    1.98    2.17 
   2   8  -1    0.71    2.39 
  -2   8   1    1.04    4.02 
   2   8  -1    0.39    2.46 
   2   8  -1    0.38    2.34 
   2   8  -1    3.41    2.80 
   2   8  -1    1.15    3.21 
  -1  -8   1    0.21    2.33 
  -1  -8   1    3.40    2.93 
   1  -8  -1    1.89    2.83 
  -1  -8   1    5.41    3.93 
   1  -8  -1    2.30    2.22 
   1  -8  -1   -0.95    2.17 
  -1  -8   1    1.62    2.32 
  -1  -8   1   -0.30    3.67 
  -1  -8   1    2.74    3.27 
  -1  -8   1    1.95    2.17 
  -1  -8   1    3.45    2.46 
  -1  -8   1    0.70    3.29 
  -1  -8   1    0.75    3.74 
   1  -8  -1    6.96    2.89 
   1  -8  -1    3.61    2.62 
   1  -8  -1    7.27    4.29 
   1  -8  -1   -3.45    3.33 
   1  -8  -1    5.20    4.23 
   1  -8  -1   -2.59    2.86 
  -1   8   1    0.82    2.59 
   1   8  -1    0.34    2.48 
  -1   8   1    2.39    2.02 
  -1   8   1    0.76    1.88 
   1   8  -1    0.47    2.46 
  -1   8   1   -0.43    2.05 
  -1   8   1    1.75    2.56 
  -1   8   1   -0.24    2.53 
   1   8  -1    0.57    3.85 
   1   8  -1    6.80    3.26 
   1   8  -1    0.56    3.40 
  -1   8   1   -2.15    2.34 
   1   8  -1    3.88    2.75 
   1   8  -1   -1.78    2.07 
   1   8  -1    2.18    2.39 
  -1   8   1   -0.25    2.99 
   1   8  -1   -4.56    1.85 
   1   8  -1    3.83    2.84 
   1   8  -1    2.14    1.79 
  -1   8   1   -0.35    3.29 
  -1   8   1   -0.61    2.72 
   0  -8  -1   12.16    3.45 
   0  -8   1   22.98    5.05 
   0  -8   1    9.49    3.48 
   0  -8  -1    9.99    4.51 
   0  -8   1   23.63    4.08 
   0  -8   1   12.86    4.80 
   0  -8   1   19.68    4.81 
   0  -8  -1   16.63    4.42 
   0  -8  -1   24.81    4.81 
   0  -8   1   12.23    4.69 
   0  -8  -1   19.65    3.98 
   0  -8   1    9.85    3.38 
   0  -8  -1   16.58    3.58 
   0  -8  -1   21.15    4.23 
   0  -8   1    3.49    5.42 
   0  -8   1   27.19    5.07 
   0  -8  -1    9.36    3.28 
   0  -8  -1   24.28    6.71 
   0  -8  -1   18.32    5.32 
   0  -8  -1   20.95    4.75 
   0  -8   1   16.98    3.87 
   0   8   1   20.39    3.88 
   0   8  -1   15.16    4.99 
   0   8  -1   26.01    5.87 
   0   8  -1   14.57    3.84 
   0   8  -1   22.18    4.36 
   0   8  -1   22.02    3.82 
   0   8   1   14.83    3.81 
   0   8   1   29.96    5.97 
   0   8   1   21.79    4.46 
   0   8   1   16.83    3.71 
   0   8  -1   18.84    5.15 
   0   8   1   23.74    3.23 
   0   8  -1   15.00    3.70 
   0   8  -1   19.89    3.47 
   0   8  -1   15.49    3.44 
   0   8   1   18.98    3.82 
   0   8   1   14.37    3.74 
   0   8  -1   17.58    3.70 
   0   8  -1   14.83    3.13 
   0   8   1   20.78    3.68 
   0   8   1   17.35    5.31 
   0   8   1   18.06    3.86 
   0   8   1   21.08    5.19 
   0   8   1   16.88    2.76 
   1  -8   1   98.41    8.78 
  -1  -8  -1   58.35    9.68 
   1  -8   1  106.34   11.19 
   1  -8   1   72.55    9.97 
   1  -8   1   89.47    8.99 
  -1  -8  -1   83.73    9.84 
  -1  -8  -1   74.92   10.61 
   1  -8   1   93.24    8.75 
  -1  -8  -1   97.86    8.83 
   1  -8   1   91.95   10.88 
  -1  -8  -1   91.31   10.23 
  -1  -8  -1   83.91   11.71 
  -1  -8  -1   88.62    9.08 
  -1  -8  -1   87.66    8.28 
   1  -8   1   89.65    8.52 
   1  -8   1   86.85    9.74 
  -1  -8  -1   87.79    8.32 
  -1  -8  -1   90.51    9.25 
   1  -8   1   82.22    9.58 
  -1  -8  -1   87.93    8.28 
  -1  -8  -1   91.27    8.31 
   1   8   1   85.15    8.50 
   1   8   1   87.96    8.92 
   1   8   1  110.24   12.84 
  -1   8  -1   84.43    8.09 
   1   8   1   89.34    8.36 
  -1   8  -1  109.77   10.40 
  -1   8  -1  103.20    9.83 
  -1   8  -1   87.01    8.43 
  -1   8  -1   64.29    8.30 
   1   8   1  100.53    8.59 
  -1   8  -1   96.86    8.27 
   1   8   1   89.05    9.67 
   1   8   1   76.63   10.96 
  -1   8  -1   89.51    7.43 
   1   8   1   94.10    8.93 
  -1   8  -1  105.15   10.35 
  -1   8  -1   95.99    8.00 
   1   8   1  100.92    8.52 
   1   8   1   86.89    8.83 
  -1   8  -1   89.77    8.06 
   2  -8   1   12.01    5.17 
   2  -8   1   10.66    3.57 
   2  -8   1   13.32    3.59 
  -2  -8  -1   16.75    5.17 
   2  -8   1   15.34    3.85 
  -2  -8  -1   11.00    3.11 
   2  -8   1   11.71    4.13 
  -2  -8  -1   10.06    3.31 
   2  -8   1    2.68    3.83 
  -2  -8  -1   15.76    3.71 
  -2  -8  -1   11.40    3.36 
  -2  -8  -1   17.11    4.73 
  -2  -8  -1   21.54    4.04 
   2  -8   1   16.47    4.81 
  -2  -8  -1   10.89    3.17 
  -2  -8  -1    8.95    4.31 
   2  -8   1    7.48    3.19 
   2   8   1    7.29    3.39 
   2   8   1    7.56    3.73 
  -2   8  -1   15.22    3.38 
   2   8   1   14.62    3.61 
   2   8   1   17.95    3.66 
   2   8   1   14.10    3.57 
  -2   8  -1   15.65    4.49 
  -2   8  -1   14.55    3.22 
   2   8   1    6.66    3.61 
  -2   8  -1   25.55    5.28 
   2   8   1    9.37    3.22 
  -2   8  -1   12.83    3.48 
  -2   8  -1   19.43    4.87 
  -2   8  -1   16.55    3.60 
   2   8   1   15.01    3.69 
  -2   8  -1    7.30    3.22 
   2   8   1    7.94    4.66 
  -3  -8  -1   48.22    6.10 
   3  -8   1   49.20    6.38 
   3  -8   1   45.18    7.21 
  -3  -8  -1   38.88    5.16 
   3  -8   1   45.34    6.42 
   3  -8   1   40.51    6.91 
  -3  -8  -1   44.43    7.33 
   3  -8   1   61.14    8.68 
   3  -8   1   36.31    5.77 
  -3  -8  -1   42.05    5.72 
   3  -8   1   32.69    6.97 
  -3  -8  -1   47.11    7.22 
  -3  -8  -1   46.04    7.03 
   3  -8   1   47.82    6.29 
   3  -8   1   42.46    6.97 
  -3  -8  -1   46.98    5.85 
   3   8   1   54.26    6.84 
  -3   8  -1   49.87    7.71 
   3   8   1   44.88    6.08 
  -3   8  -1   47.76    5.45 
   3   8   1   45.91    8.20 
  -3   8  -1   44.34    5.62 
   3   8   1   44.76    5.84 
  -3   8  -1   42.89    5.88 
   3   8   1   44.92    6.22 
   3   8   1   32.90    5.36 
  -3   8  -1   55.93    6.65 
  -3   8  -1   50.36    5.29 
  -3   8  -1   31.94    5.23 
   3   8   1   45.40    6.11 
  -3   8  -1   44.07    7.91 
   3   8   1   28.36    6.10 
   3   8   1   41.75    5.72 
   3   8   1   49.12    5.70 
  -3   8  -1   48.27    7.69 
  -4  -8  -1   -2.33    2.07 
   4  -8   1   -3.96    4.16 
  -4  -8  -1   -0.07    3.08 
   4  -8   1    0.81    4.97 
   4  -8   1    1.65    2.52 
  -4  -8  -1   -0.45    2.12 
   4  -8   1    5.04    3.20 
   4  -8   1    2.06    3.78 
   4  -8   1   -1.00    2.65 
  -4  -8  -1   -2.36    2.95 
   4  -8   1   -1.82    2.44 
  -4  -8  -1   -2.58    2.26 
   4  -8   1    3.67    4.04 
  -4  -8  -1   -1.33    2.07 
  -4  -8  -1   -0.53    2.17 
   4   8   1   -2.02    2.59 
   4   8   1    0.32    2.27 
  -4   8  -1   -0.40    2.46 
  -4   8  -1    3.53    2.68 
   4   8   1    0.13    2.63 
  -4   8  -1    3.94    4.07 
  -4   8  -1    2.28    3.53 
  -4   8  -1    2.64    4.07 
   4   8   1   -0.98    2.16 
  -4   8  -1   -2.21    2.80 
   4   8   1   -0.56    2.76 
  -4   8  -1   -1.10    3.03 
  -4   8  -1   -3.46    3.86 
   4   8   1   -0.21    2.69 
   4   8   1    0.31    3.03 
  -4   8  -1    2.47    2.95 
   4   8   1    0.73    2.42 
   4   8   1    0.72    2.69 
   4   8   1    0.32    2.55 
  -4   8  -1   -1.49    3.67 
   5  -8   1   33.50    6.75 
  -5  -8  -1   36.83    6.55 
   5  -8   1   20.73    4.76 
  -5  -8  -1   24.48    4.76 
   5  -8   1   38.17    5.53 
   5  -8   1   23.96    5.75 
   5  -8   1   35.22    5.32 
  -5  -8  -1   23.17    4.41 
   5  -8   1   28.87    6.77 
  -5  -8  -1   31.28    5.23 
  -5  -8  -1   38.76    6.02 
   5  -8   1   35.26    6.66 
   5  -8   1   25.76    5.18 
  -5   8  -1   32.32    5.24 
   5   8   1   30.01    5.07 
  -5   8  -1   26.05    6.71 
  -5   8  -1   25.43    5.09 
   5   8   1   27.91    5.38 
   5   8   1   30.61    4.80 
   5   8   1   25.91    5.23 
  -5   8  -1   16.51    6.66 
   5   8   1   32.59    5.29 
   5   8   1   35.53    4.65 
  -5   8  -1   25.58    4.66 
   5   8   1   36.71    6.16 
  -5   8  -1   23.40    5.03 
   5   8   1   30.04    5.07 
  -5   8  -1   26.89    6.75 
  -5   8  -1   36.30    7.08 
  -5   8  -1   32.13    4.57 
  -6  -8  -1   -1.22    2.58 
   6  -8   1   -2.26    4.34 
   6  -8   1    4.31    2.96 
   6  -8   1    2.21    3.03 
  -6  -8  -1    0.05    2.73 
   6  -8   1   -4.73    2.69 
   6  -8   1    2.01    4.17 
  -6  -8  -1    2.20    3.50 
   6  -8   1    1.30    3.03 
   6  -8   1    0.43    3.85 
  -6  -8  -1    0.90    3.35 
  -6  -8  -1   -1.95    2.83 
   6   8   1    6.06    3.44 
  -6   8  -1    5.08    3.17 
  -6   8  -1   -4.87    4.33 
  -6   8  -1    0.02    3.43 
   6   8   1    5.10    3.57 
   6   8   1    1.70    2.66 
  -6   8  -1   -5.15    4.08 
  -6   8  -1   10.68    5.11 
  -6   8  -1    3.38    3.54 
  -6   8  -1   -2.05    3.59 
   6   8   1   10.34    3.49 
  -6   8  -1    4.22    4.97 
   6   8   1    3.36    3.09 
  -6   8  -1    1.60    3.71 
  -6   8  -1    1.59    3.41 
   6   8   1    0.69    2.92 
   5  -9  -1   -0.98    5.04 
   5  -9  -1   -0.29    3.46 
   5  -9  -1    6.50    5.22 
  -5  -9   1    2.01    3.31 
  -5  -9   1   -0.60    3.64 
  -5  -9   1    0.88    2.91 
   5  -9  -1    2.30    3.17 
  -5  -9   1    1.21    2.80 
   5  -9  -1    3.88    4.35 
  -5  -9   1   -0.05    3.71 
   5  -9  -1   -7.06    2.64 
  -5  -9   1   -5.72    3.41 
   5  -9  -1   -1.02    2.56 
   5  -9  -1    0.78    3.50 
   5  -9  -1   -0.27    5.56 
  -5   9   1    1.99    5.02 
   5   9  -1    1.97    3.01 
  -5   9   1    2.86    3.77 
   5   9  -1    0.72    3.49 
  -5   9   1    5.74    5.00 
  -5   9   1   10.28    4.99 
  -5   9   1    1.91    3.85 
  -5   9   1    3.76    3.21 
   5   9  -1   -2.52    3.23 
   5   9  -1   -1.56    2.80 
   5   9  -1   -7.53    2.24 
  -5   9   1   -1.07    3.26 
  -4  -9   1  133.23   11.55 
   4  -9  -1  169.16   14.47 
   4  -9  -1  152.60   13.13 
   4  -9  -1  146.89   15.05 
   4  -9  -1  132.15   11.71 
  -4  -9   1  133.75   14.45 
  -4  -9   1  127.94   11.47 
   4  -9  -1  137.83   15.56 
   4  -9  -1  136.69   12.34 
  -4  -9   1  113.51   13.38 
   4  -9  -1  121.27   11.65 
  -4  -9   1  107.27   13.20 
  -4  -9   1  124.96   12.29 
   4  -9  -1  138.36   12.57 
   4  -9  -1  117.28   14.54 
  -4  -9   1  133.02   12.19 
   4   9  -1  117.33   11.25 
  -4   9   1  153.93   11.68 
   4   9  -1  146.76   12.55 
  -4   9   1  146.93   14.74 
  -4   9   1  128.88   13.89 
   4   9  -1  110.95   12.87 
   4   9  -1  147.04   11.45 
  -4   9   1  122.11   11.64 
  -4   9   1  133.52   11.36 
  -4   9   1  128.42   11.93 
   4   9  -1  132.43   12.04 
  -4   9   1  157.18   14.46 
   4   9  -1  142.62   11.86 
   3  -9  -1    2.74    2.66 
  -3  -9   1    0.83    3.87 
   3  -9  -1   -2.81    3.51 
  -3  -9   1    7.32    4.84 
   3  -9  -1    2.79    4.77 
   3  -9  -1    4.75    4.65 
  -3  -9   1    3.24    4.17 
   3  -9  -1    2.77    3.49 
  -3  -9   1   -0.14    2.61 
   3  -9  -1   -1.49    3.56 
  -3  -9   1    2.24    2.95 
   3  -9  -1    3.54    3.02 
  -3  -9   1    3.64    2.91 
  -3  -9   1   -1.55    2.62 
   3  -9  -1   -2.87    2.77 
  -3  -9   1    6.03    4.42 
   3  -9  -1    4.65    3.63 
  -3   9   1   -1.37    3.72 
  -3   9   1    2.12    3.49 
  -3   9   1    3.97    3.14 
   3   9  -1    2.88    3.08 
   3   9  -1   -0.68    2.70 
   3   9  -1    1.97    2.90 
  -3   9   1   -1.53    3.44 
  -3   9   1    2.98    3.25 
   3   9  -1   -6.89    2.87 
   3   9  -1    1.53    2.61 
   3   9  -1   -1.67    2.66 
   3   9  -1    5.49    3.87 
  -3   9   1    6.79    3.54 
  -3   9   1    5.40    3.00 
   3   9  -1    6.74    4.27 
   3   9  -1    6.70    3.14 
   2  -9  -1   32.80    5.62 
  -2  -9   1   30.54    5.54 
   2  -9  -1   24.59    5.50 
  -2  -9   1   20.09    6.20 
  -2  -9   1   30.39    6.44 
  -2  -9   1   30.78    6.43 
   2  -9  -1   31.86    6.63 
   2  -9  -1   25.24    4.67 
  -2  -9   1   26.85    4.87 
  -2  -9   1   37.25    6.61 
   2  -9  -1   22.40    4.89 
  -2  -9   1   21.90    4.48 
  -2  -9   1   33.82    5.59 
   2  -9  -1   40.52    5.61 
   2  -9  -1   30.76    6.74 
   2  -9  -1   35.46    5.75 
   2   9  -1   29.48    5.11 
   2   9  -1   36.01    5.60 
  -2   9   1   35.07    4.99 
  -2   9   1   33.11    6.75 
  -2   9   1   34.87    5.47 
  -2   9   1   39.00    5.49 
   2   9  -1   26.53    4.81 
   2   9  -1   14.93    4.94 
   2   9  -1   42.72    5.51 
  -2   9   1   36.01    6.80 
  -2   9   1   33.28    4.56 
   2   9  -1   23.53    6.56 
   2   9  -1   28.23    4.90 
   2   9  -1   31.35    5.16 
   2   9  -1   44.26    5.50 
  -2   9   1   39.25    6.53 
  -2   9   1   24.19    5.11 
   1  -9  -1    1.60    3.60 
   1  -9  -1   -3.10    3.62 
   1  -9  -1    0.24    4.30 
  -1  -9   1    0.93    2.48 
  -1  -9   1   -0.84    3.91 
  -1  -9   1    0.02    2.61 
  -1  -9   1    0.45    2.46 
  -1  -9   1   -6.69    3.60 
  -1  -9   1   -9.86    5.38 
  -1  -9   1   -2.19    3.11 
   1  -9  -1   -2.98    2.60 
   1  -9  -1   -0.09    2.37 
  -1  -9   1   -1.48    2.33 
  -1  -9   1   -3.91    2.61 
  -1  -9   1    3.29    3.61 
   1  -9  -1   -0.68    2.79 
  -1  -9   1   -1.20    3.32 
   1  -9  -1    8.15    4.61 
   1  -9  -1    1.16    2.66 
   1   9  -1   -0.73    2.70 
   1   9  -1   -1.33    2.51 
  -1   9   1   -1.90    3.08 
   1   9  -1    1.85    2.92 
  -1   9   1   -0.87    2.28 
  -1   9   1    0.89    2.83 
   1   9  -1    1.73    2.81 
   1   9  -1   -2.34    2.72 
   1   9  -1   -0.30    2.59 
   1   9  -1   -2.59    2.34 
  -1   9   1    1.37    3.65 
  -1   9   1    1.44    2.80 
  -1   9   1    0.66    2.49 
   1   9  -1   -5.46    3.36 
   1   9  -1    0.18    2.51 
  -1   9   1   -1.39    2.81 
   1   9  -1   -3.30    3.06 
  -1   9   1   -2.85    2.12 
  -1   9   1    1.56    2.80 
   0  -9  -1   64.25    9.70 
   0  -9  -1   61.90    7.52 
   0  -9   1   65.61    7.68 
   0  -9  -1   58.38    7.99 
   0  -9  -1   60.86    9.17 
   0  -9   1   71.41    7.47 
   0  -9  -1   61.16    7.25 
   0  -9   1   59.55    8.03 
   0  -9  -1   56.91    7.23 
   0  -9  -1   70.78    8.62 
   0  -9   1   64.39    8.40 
   0  -9   1   50.83    7.72 
   0  -9  -1   57.85    9.02 
   0  -9  -1   64.07    7.13 
   0  -9   1   55.64    7.13 
   0  -9   1   59.90    7.60 
   0  -9   1   70.88    9.39 
   0  -9   1   63.77   10.05 
   0  -9  -1   48.49    7.16 
   0  -9   1   61.93    9.61 
   0   9   1   68.89    7.32 
   0   9  -1   78.49    9.78 
   0   9   1   46.33    7.02 
   0   9   1   44.65    6.62 
   0   9  -1   61.17    6.86 
   0   9  -1   77.77    7.20 
   0   9  -1   61.84    6.46 
   0   9  -1   51.23    6.95 
   0   9   1   64.45    7.01 
   0   9   1   59.21    9.37 
   0   9   1   70.39    9.47 
   0   9   1   70.42    7.71 
   0   9  -1   66.16    7.69 
   0   9  -1   72.40    9.44 
   0   9   1   85.24    8.48 
   0   9   1   73.23    7.56 
   0   9   1   70.25    9.39 
   0   9  -1   69.48    7.54 
   0   9  -1   81.13    9.86 
  -1  -9  -1   -1.91    2.42 
  -1  -9  -1   -1.05    2.23 
  -1  -9  -1    3.90    4.39 
   1  -9   1   -3.81    3.72 
   1  -9   1    6.16    4.06 
  -1  -9  -1    3.16    3.56 
   1  -9   1   -4.19    3.77 
   1  -9   1    5.97    3.09 
   1  -9   1    0.85    2.91 
  -1  -9  -1    1.56    2.55 
  -1  -9  -1   -5.29    5.47 
  -1  -9  -1    0.54    2.72 
  -1  -9  -1   -1.24    2.53 
   1  -9   1    1.87    3.83 
  -1  -9  -1   -2.49    3.37 
   1  -9   1   -0.02    2.69 
  -1  -9  -1    3.83    2.59 
   1  -9   1    6.88    3.88 
   1  -9   1    0.84    2.72 
  -1  -9  -1    9.00    4.82 
  -1  -9  -1    2.19    3.58 
  -1   9  -1   -2.06    2.47 
   1   9   1    0.34    2.80 
   1   9   1    0.88    2.64 
  -1   9  -1    0.90    2.67 
  -1   9  -1   -3.10    2.29 
   1   9   1    1.88    3.13 
  -1   9  -1   -0.38    2.83 
  -1   9  -1   -2.92    2.87 
   1   9   1   -2.66    2.52 
  -1   9  -1    1.38    3.48 
  -1   9  -1    4.78    3.33 
   1   9   1    2.24    3.28 
   1   9   1    5.55    3.10 
   1   9   1    4.81    4.26 
  -1   9  -1    0.96    2.55 
  -1   9  -1    0.38    2.17 
   1   9   1   -3.01    2.36 
   1   9   1    0.23    3.70 
   1   9   1    6.95    3.14 
   2  -9   1  115.71   10.51 
  -2  -9  -1  115.17   10.32 
  -2  -9  -1  104.66   10.05 
  -2  -9  -1  121.69   12.63 
   2  -9   1  119.89   10.84 
  -2  -9  -1  116.63   11.37 
  -2  -9  -1  122.35   10.32 
   2  -9   1  114.26   10.59 
   2  -9   1  118.08   12.65 
  -2  -9  -1   99.58    9.90 
  -2  -9  -1   65.61   11.62 
   2  -9   1  113.38   12.81 
   2  -9   1  111.48   10.59 
  -2  -9  -1  110.67    9.84 
  -2  -9  -1   98.35   11.95 
   2  -9   1   91.41   11.06 
  -2   9  -1  102.11   11.23 
   2   9   1   99.13   11.79 
   2   9   1  131.21   10.38 
   2   9   1  122.14   10.23 
   2   9   1  115.03   10.52 
   2   9   1  115.53   10.26 
   2   9   1   92.51   10.51 
  -2   9  -1  123.83   10.33 
  -2   9  -1   96.19    9.86 
  -2   9  -1  119.32   11.39 
   2   9   1  102.98   10.93 
   2   9   1  121.74   10.52 
  -2   9  -1  128.56   11.95 
  -2   9  -1  112.66    9.75 
  -2   9  -1  125.84   10.63 
   2   9   1  114.58   10.13 
   2   9   1  116.72   14.12 
   3  -9   1    2.68    3.42 
   3  -9   1    8.54    4.98 
  -3  -9  -1   -6.82    3.30 
  -3  -9  -1    1.67    2.96 
  -3  -9  -1   -0.72    4.01 
   3  -9   1    0.07    3.03 
  -3  -9  -1    0.06    2.64 
   3  -9   1   -1.57    2.58 
  -3  -9  -1    0.82    4.36 
  -3  -9  -1   -1.65    2.54 
   3  -9   1    1.62    3.94 
   3  -9   1   -0.27    3.77 
   3  -9   1   -0.92    2.22 
   3  -9   1    6.66    4.52 
  -3   9  -1    2.39    3.16 
   3   9   1   -3.66    2.46 
   3   9   1    7.01    4.95 
  -3   9  -1   -2.33    2.62 
   3   9   1    1.97    3.13 
  -3   9  -1    4.35    4.11 
   3   9   1    3.22    3.25 
   3   9   1   -2.12    3.71 
   3   9   1    4.93    3.15 
  -3   9  -1    2.36    3.74 
   3   9   1    3.86    2.91 
  -3   9  -1   -0.09    3.18 
  -3   9  -1    2.30    3.56 
   3   9   1   -0.95    2.71 
  -3   9  -1    1.07    2.94 
   3   9   1   -1.84    2.41 
   4  -9   1   49.69    8.02 
  -4  -9  -1   41.05    6.09 
   4  -9   1   31.08    5.61 
  -4  -9  -1   42.27    6.43 
   4  -9   1   37.54    6.50 
  -4  -9  -1   48.57    6.12 
  -4  -9  -1   44.73    7.43 
  -4  -9  -1   34.78    5.43 
  -4  -9  -1   48.06    8.29 
   4  -9   1   43.13    7.71 
   4  -9   1   51.40    8.90 
   4  -9   1   34.82    7.38 
  -4  -9  -1   39.34    7.15 
   4  -9   1   42.24    6.69 
   4  -9   1   27.63    5.73 
  -4   9  -1   45.90    6.30 
   4   9   1   48.27    5.76 
   4   9   1   38.15    6.03 
   4   9   1   31.08    6.72 
  -4   9  -1   48.03    8.13 
  -4   9  -1   31.44    5.47 
   4   9   1   32.74    5.92 
  -4   9  -1   44.47    5.64 
  -4   9  -1   40.66    8.23 
   4   9   1   40.41    6.17 
  -4   9  -1   27.03    5.40 
  -4   9  -1   46.13    7.82 
   4   9   1   24.10    5.65 
   4   9   1   32.01    5.57 
   4   9   1   43.28    6.60 
   5  -9   1    2.92    5.20 
  -5  -9  -1   -2.17    3.95 
   5  -9   1   -2.84    3.25 
  -5  -9  -1   -2.25    2.64 
   5  -9   1    0.89    4.64 
   5  -9   1    1.10    3.40 
  -5  -9  -1   -0.09    4.05 
   5  -9   1    0.07    3.22 
  -5  -9  -1    0.58    2.98 
  -5  -9  -1    0.93    3.72 
  -5  -9  -1   -3.19    2.65 
   5  -9   1    2.70    4.91 
   5  -9   1   -2.92    2.90 
   5   9   1    1.09    3.78 
  -5   9  -1   -0.91    3.61 
  -5   9  -1    2.54    3.49 
   5   9   1   -7.08    3.14 
  -5   9  -1    3.98    3.16 
   5   9   1    1.62    3.25 
   5   9   1   -2.63    2.96 
   5   9   1    2.08    3.65 
  -5   9  -1   -4.34    3.68 
  -5   9  -1   -0.04    4.77 
  -5   9  -1    0.37    4.30 
  -5   9  -1    2.20    4.41 
  -5   9  -1    1.31    4.46 
   5   9   1    7.71    3.79 
   5   9   1   -0.04    3.01 
   5   9   1   -3.01    3.06 
  -3 -10   1    9.57    5.66 
   3 -10  -1   15.66    5.26 
  -3 -10   1   13.67    6.20 
   3 -10  -1    9.50    5.52 
   3 -10  -1    5.34    3.58 
   3 -10  -1    9.19    4.88 
  -3 -10   1    9.53    3.78 
  -3 -10   1   14.12    4.06 
   3 -10  -1   17.53    4.92 
   3 -10  -1   19.32    5.15 
  -3 -10   1    8.50    3.71 
   3 -10  -1   15.21    4.28 
   3 -10  -1   19.19    6.05 
  -3 -10   1   19.18    4.48 
  -3 -10   1   13.29    5.31 
  -3 -10   1    8.98    5.12 
   3 -10  -1   11.28    3.61 
   3  10  -1    2.21    4.13 
   3  10  -1    5.58    3.27 
  -3  10   1   14.13    5.23 
   3  10  -1   16.36    4.57 
   3  10  -1   22.49    4.41 
  -3  10   1   17.96    5.45 
  -3  10   1   19.28    5.08 
  -3  10   1   23.94    5.92 
  -3  10   1   12.75    4.21 
  -3  10   1    7.55    3.96 
  -3  10   1   16.45    3.95 
   3  10  -1   15.45    4.65 
   3  10  -1   11.91    5.44 
   3  10  -1   15.88    4.37 
  -2 -10   1  -11.55    3.39 
   2 -10  -1   -2.24    3.18 
  -2 -10   1    2.25    4.54 
   2 -10  -1    5.74    3.79 
  -2 -10   1    2.98    3.20 
   2 -10  -1   -0.66    2.77 
  -2 -10   1   -0.20    2.86 
   2 -10  -1   -2.44    2.41 
  -2 -10   1   -0.12    2.71 
  -2 -10   1   -1.63    4.65 
   2 -10  -1    7.87    4.44 
  -2 -10   1    1.03    2.75 
  -2 -10   1    3.06    7.97 
   2 -10  -1    0.82    2.96 
  -2 -10   1   -0.46    3.91 
   2 -10  -1    6.73    4.67 
   2  10  -1    0.02    2.99 
  -2  10   1    1.60    2.82 
  -2  10   1    6.78    3.17 
  -2  10   1    1.96    3.21 
   2  10  -1   -0.29    3.79 
  -2  10   1    5.26    4.33 
  -2  10   1    2.32    3.72 
  -2  10   1   -2.26    2.90 
  -2  10   1    5.14    3.52 
   2  10  -1    0.97    3.05 
  -2  10   1    2.92    3.26 
   2  10  -1    3.62    3.26 
  -2  10   1    4.62    3.88 
   2  10  -1   -0.53    3.14 
   2  10  -1    5.73    3.68 
   2  10  -1   -0.92    2.75 
  -1 -10   1    3.63    3.44 
  -1 -10   1    9.53    3.47 
   1 -10  -1    8.22    4.27 
   1 -10  -1    2.35    4.45 
  -1 -10   1    1.45    5.17 
   1 -10  -1    3.16    3.76 
   1 -10  -1   12.08    3.96 
   1 -10  -1    6.41    5.11 
  -1 -10   1    4.89    3.03 
  -1 -10   1    8.08    4.85 
   1 -10  -1    4.62    3.21 
   1 -10  -1   -0.03    2.99 
  -1 -10   1    8.86    6.95 
  -1 -10   1    6.25    3.89 
  -1 -10   1   -1.20    4.41 
   1 -10  -1   -0.39    3.11 
  -1 -10   1    3.70    3.33 
  -1  10   1    6.96    4.41 
  -1  10   1    5.90    4.27 
  -1  10   1    5.35    2.93 
  -1  10   1    5.62    3.16 
  -1  10   1    2.61    3.36 
   1  10  -1    5.74    4.77 
   1  10  -1    4.45    3.32 
  -1  10   1    3.60    3.91 
  -1  10   1    5.38    3.55 
  -1  10   1    8.96    3.23 
   1  10  -1   10.35    3.41 
   1  10  -1   -1.63    2.94 
  -1  10   1    1.81    3.83 
   1  10  -1    7.37    4.54 
   1  10  -1    2.31    3.36 
   0 -10  -1    7.16    2.97 
   0 -10   1    7.91    4.22 
   0 -10  -1    0.57    4.47 
   0 -10   1   -7.06    4.57 
   0 -10  -1    2.19    3.07 
   0 -10   1    2.45    3.56 
   0 -10   1    0.86    4.26 
   0 -10  -1    1.05    2.93 
   0 -10  -1    8.55    4.69 
   0 -10  -1    7.26    4.26 
   0 -10  -1   13.83    4.58 
   0 -10  -1    4.80    3.32 
   0 -10   1    4.62    3.20 
   0 -10  -1   -0.15    4.77 
   0 -10  -1    1.00    2.86 
   0 -10   1   -3.54    3.90 
   0 -10   1    2.46    2.96 
   0  10   1    1.36    3.39 
   0  10   1    1.36    2.53 
   0  10  -1    7.60    3.50 
   0  10   1    6.31    3.26 
   0  10  -1    4.02    3.04 
   0  10  -1    4.44    4.35 
   0  10  -1    7.34    3.13 
   0  10  -1    6.53    3.65 
   0  10   1    5.44    4.39 
   0  10   1    4.85    4.19 
   0  10   1    3.09    3.08 
   0  10  -1    5.24    4.37 
   0  10   1    6.72    4.67 
   0  10   1    3.93    3.38 
   0  10   1    6.94    3.32 
   0  10  -1    6.13    4.28 
   1 -10   1   40.32    6.35 
  -1 -10  -1   34.43    6.05 
  -1 -10  -1   47.23    8.53 
   1 -10   1   34.96    6.74 
  -1 -10  -1   52.66    6.63 
  -1 -10  -1   50.64    6.47 
   1 -10   1   46.04    6.64 
   1 -10   1   52.93    8.89 
   1 -10   1   49.56    8.21 
   1 -10   1   39.21    7.31 
  -1 -10  -1   41.47    7.17 
  -1 -10  -1   36.02    9.01 
  -1 -10  -1   42.60    6.37 
   1 -10   1   33.24    6.20 
   1 -10   1   40.80    6.41 
  -1 -10  -1   42.76    8.47 
  -1 -10  -1   40.93    7.17 
   1  10   1   43.15    6.73 
   1  10   1   56.48    6.87 
   1  10   1   57.92    6.91 
   1  10   1   47.43    8.68 
  -1  10  -1   47.50    6.43 
   1  10   1   40.48    8.13 
  -1  10  -1   42.62    6.27 
  -1  10  -1   53.12    6.73 
  -1  10  -1   37.38    7.22 
  -1  10  -1   49.97    7.75 
  -1  10  -1   53.48    7.94 
   1  10   1   33.47    5.87 
   1  10   1   39.94    5.95 
   1  10   1   32.62    6.19 
  -2 -10  -1    0.17    4.03 
  -2 -10  -1    7.03    8.08 
   2 -10   1    4.10    4.17 
  -2 -10  -1   -5.97    4.48 
   2 -10   1    2.40    3.10 
  -2 -10  -1    3.27    4.15 
   2 -10   1    4.28    4.23 
   2 -10   1    7.61    4.39 
  -2 -10  -1    4.58    3.41 
  -2 -10  -1    5.18    5.13 
  -2 -10  -1    5.99    3.31 
   2 -10   1   -2.50    2.85 
   2 -10   1    7.08    4.03 
   2 -10   1   10.50    4.14 
  -2 -10  -1    4.74    2.96 
   2  10   1    6.44    3.43 
   2  10   1    4.88    3.24 
   2  10   1   10.49    4.03 
  -2  10  -1    5.02    3.52 
   2  10   1    5.42    3.23 
  -2  10  -1    2.91    2.83 
   2  10   1    1.77    3.36 
  -2  10  -1   -0.04    3.31 
  -2  10  -1   -0.18    3.41 
   2  10   1    1.62    3.24 
   2  10   1    1.56    3.50 
  -2  10  -1    7.64    4.35 
   2  10   1    2.87    5.00 
  -2  10  -1    5.20    3.04 
  -2  10  -1    6.05    4.15 
  -3 -10  -1   10.70    3.66 
   3 -10   1   17.95    4.44 
  -3 -10  -1   13.32    4.09 
   3 -10   1   20.40    4.98 
  -3 -10  -1   18.90    6.16 
  -3 -10  -1   12.81    5.47 
  -3 -10  -1    8.38    5.88 
  -3 -10  -1    4.55    3.40 
   3 -10   1   11.61    5.52 
   3 -10   1   18.44    5.01 
   3 -10   1   24.32    5.86 
   3 -10   1   10.72    5.03 
   3 -10   1   14.76    4.33 
   3 -10   1   15.06    5.86 
   3 -10   1    6.07    4.12 
  -3  10  -1    9.91    4.90 
  -3  10  -1   15.32    4.88 
   3  10   1   23.99    6.95 
  -3  10  -1   13.02    3.68 
   3  10   1   15.91    4.16 
   3  10   1   18.77    4.92 
  -3  10  -1   14.28    4.48 
   3  10   1    5.60    3.56 
   3  10   1    7.95    3.97 
   3  10   1   12.87    4.69 
  -3  10  -1   18.12    4.71 
   3  10   1    9.53    3.84 
   3  10   1    3.44    3.92 
  -3  10  -1   17.37    5.47 
  -3  10  -1    8.22    3.57 
  10   0  -2   41.38    5.46 
 -10   0   2   35.91    6.37 
 -10   0   2   38.07    5.68 
 -10   0   2   33.77    6.06 
 -10   0   2   33.12    5.67 
 -10   0   2   47.11    6.04 
 -10   0   2   32.91    6.02 
  10   0  -2   34.26    5.22 
 -10   0   2   39.18    5.68 
  10   0  -2   24.92    6.29 
 -10   0   2   33.98    6.43 
  10   0  -2   28.01    4.91 
 -10   0   2   51.69    7.79 
 -10   0   2   45.86    6.32 
  10   0  -2   49.92    6.96 
  10   0  -2   39.12    5.33 
  10   0  -2   34.08    5.16 
 -10   0   2   41.15    5.50 
  10   0  -2   35.28    5.40 
   9   0  -2   -0.87    2.03 
  -9   0   2   -0.36    2.31 
   9   0  -2   -1.45    2.22 
  -9   0   2    1.48    3.05 
   9   0  -2   -0.99    2.37 
  -9   0   2   -2.15    2.68 
   9   0  -2   -2.32    1.68 
   9   0  -2   -4.10    1.55 
  -9   0   2   -0.76    1.98 
  -9   0   2    2.16    2.56 
  -9   0   2   -3.85    2.52 
   9   0  -2    2.92    3.44 
  -9   0   2    2.89    2.76 
   9   0  -2    1.98    2.50 
   9   0  -2    0.45    2.25 
  -9   0   2   -3.46    2.77 
   9   0  -2    0.33    2.12 
   9   0  -2   -0.01    1.98 
  -9   0   2   -1.84    2.23 
  -9   0   2   -0.14    2.31 
  -9   0   2    1.80    2.74 
   8   0  -2   99.92    8.65 
  -8   0   2   96.28    9.37 
   8   0  -2  110.93    8.80 
   8   0  -2  106.09    8.79 
  -8   0   2   96.51    8.71 
   8   0  -2  109.30    8.74 
  -8   0   2  102.90    9.63 
  -8   0   2  110.81    9.64 
   8   0  -2  106.02    8.83 
  -8   0   2  108.66    9.06 
   8   0  -2  106.45    8.70 
   8   0  -2  109.48    8.92 
   8   0  -2  105.44    8.65 
   8   0  -2  115.40    8.34 
  -8   0   2  105.64    9.20 
   8   0  -2   78.55   10.11 
   8   0  -2   95.20    9.30 
  -8   0   2  113.47    8.99 
  -8   0   2  100.75    9.39 
  -8   0   2   98.93    9.74 
  -8   0   2  112.37    8.67 
  -8   0   2  108.09    9.08 
   7   0  -2    0.02    1.72 
  -7   0   2    1.95    1.93 
  -7   0   2   -0.54    2.18 
   7   0  -2   -3.68    1.95 
   7   0  -2   -1.31    1.45 
  -7   0   2    2.00    2.34 
  -7   0   2    3.01    2.20 
  -7   0   2    0.32    0.96 
   7   0  -2   -2.34    1.19 
   7   0  -2    0.26    1.57 
   7   0  -2    1.53    1.66 
  -7   0   2    0.38    2.43 
  -7   0   2   -1.19    1.60 
   7   0  -2    1.52    1.52 
  -7   0   2   -0.96    1.84 
  -7   0   2   -0.27    1.71 
   7   0  -2   -0.38    1.55 
   7   0  -2   -0.91    1.75 
   7   0  -2    0.51    1.61 
  -7   0   2   -1.19    1.88 
  -7   0   2   -1.71    1.63 
   7   0  -2    1.33    1.76 
  -7   0   2   -0.38    1.61 
   7   0  -2   -1.01    1.42 
  -6   0   2   89.07    7.57 
   6   0  -2   90.71    7.91 
   6   0  -2  102.88    7.30 
   6   0  -2   99.18    7.66 
   6   0  -2   96.16    7.43 
  -6   0   2   87.50    6.70 
  -6   0   2  101.69    7.68 
  -6   0   2  107.14    8.18 
  -6   0   2   94.17    7.71 
   6   0  -2   90.70    8.51 
  -6   0   2   92.99    6.44 
   6   0  -2   86.03    7.91 
   6   0  -2   91.57    7.48 
  -6   0   2   91.65    7.51 
   6   0  -2   91.61    7.41 
   6   0  -2   96.04    7.59 
   6   0  -2   97.07    7.55 
   6   0  -2   98.71    7.16 
  -6   0   2   99.33    7.81 
  -6   0   2   94.18    7.91 
  -6   0   2   99.53    8.23 
   6   0  -2  104.59    7.63 
   6   0  -2   99.08    7.11 
  -6   0   2   93.55    8.02 
   6   0  -2   92.23    7.43 
   5   0  -2    1.06    1.22 
   5   0  -2   -0.93    1.00 
  -5   0   2   -0.18    1.11 
   5   0  -2    1.16    1.12 
   5   0  -2    0.30    0.98 
   5   0  -2   -0.17    1.13 
   5   0  -2    0.38    1.15 
   5   0  -2    2.18    1.05 
   5   0  -2   -0.65    1.15 
  -5   0   2   -0.21    1.15 
   5   0  -2    0.99    1.03 
  -5   0   2   -0.03    1.32 
   5   0  -2   -0.13    1.08 
   5   0  -2   -0.46    1.12 
   5   0  -2   -0.47    1.04 
  -5   0   2   -0.46    1.41 
  -5   0   2   -0.87    1.16 
  -5   0   2    0.37    0.67 
   5   0  -2   -0.75    1.09 
  -5   0   2    0.80    1.40 
  -5   0   2    1.62    1.33 
  -4   0   2  634.89   40.85 
   4   0  -2  638.80   40.87 
  -4   0   2  623.68   41.19 
  -4   0   2  651.61   41.25 
   4   0  -2  628.40   40.78 
   4   0  -2  631.16   40.86 
   4   0  -2  607.55   40.87 
   4   0  -2  617.15   40.85 
  -4   0   2  608.51   40.80 
   4   0  -2  636.83   40.64 
  -4   0   2  623.60   40.94 
  -4   0   2  627.30   40.36 
   4   0  -2  611.00   40.72 
  -4   0   2  652.39   40.83 
   4   0  -2  567.00   41.09 
   4   0  -2  603.91   41.04 
  -4   0   2  640.20   41.09 
   4   0  -2  563.72   41.09 
   4   0  -2  638.62   40.63 
   4   0  -2  595.99   40.56 
   4   0  -2  643.41   40.78 
   4   0  -2  638.50   40.85 
  -4   0   2  627.42   40.62 
  -3   0   2    0.82    0.81 
  -3   0   2    0.69    0.68 
  -3   0   2   -0.25    0.79 
   3   0  -2    0.75    0.91 
  -3   0   2    0.51    0.80 
   3   0  -2    1.36    0.78 
   3   0  -2    0.93    0.93 
  -3   0   2    1.07    0.74 
   3   0  -2   -0.34    0.73 
   3   0  -2   -0.24    0.60 
   3   0  -2    0.03    0.77 
  -3   0   2    0.10    0.89 
   3   0  -2    1.18    0.85 
  -3   0   2    1.47    0.61 
   3   0  -2    0.08    0.94 
   3   0  -2    0.44    0.85 
  -3   0   2    0.41    0.71 
   3   0  -2   -0.41    0.81 
   3   0  -2    0.59    0.89 
  -3   0   2    0.12    0.53 
   3   0  -2    0.72    0.68 
  -3   0   2    0.34    0.82 
  -3   0   2    0.76    0.70 
   3   0  -2    0.25    0.70 
  -3   0   2   -0.13    0.82 
   3   0  -2    0.95    0.75 
  -3   0   2    1.20    0.79 
  -3   0   2    0.34    0.89 
   3   0  -2   -0.95    1.10 
   3   0  -2   -0.28    0.56 
   3   0  -2    0.20    0.83 
  -3   0   2    0.17    0.44 
  -3   0   2    1.09    1.03 
   3   0  -2    1.05    0.73 
   3   0  -2    1.10    0.99 
   3   0  -2   -0.87    0.71 
  -2   0   2  738.45   48.88 
  -2   0   2  729.01   48.73 
  -2   0   2  718.72   48.66 
  -2   0   2  776.78   48.99 
   2   0  -2  715.38   48.86 
   2   0  -2  762.33   48.69 
   2   0  -2  747.17   48.73 
   2   0  -2  717.10   48.93 
   2   0  -2  770.62   48.64 
  -2   0   2  787.64   48.82 
   2   0  -2  769.12   48.68 
   2   0  -2  715.29   48.86 
  -2   0   2  754.79   48.84 
   2   0  -2  742.00   48.62 
  -2   0   2  666.66   48.64 
   2   0  -2  757.33   48.83 
  -2   0   2  709.77   48.87 
  -2   0   2  774.44   48.80 
  -2   0   2  757.71   48.70 
  -2   0   2  765.08   48.75 
  -2   0   2  782.41   48.67 
   2   0  -2  704.59   48.74 
  -2   0   2  744.60   48.58 
   2   0  -2  768.19   48.78 
   2   0  -2  770.89   48.83 
   2   0  -2  786.17   49.06 
  -2   0   2  746.70   48.50 
   2   0  -2  746.74   48.65 
   2   0  -2  740.42   48.79 
  -2   0   2  745.25   48.94 
  -2   0   2  742.95   48.70 
   2   0  -2  761.94   48.71 
  -2   0   2  722.73   48.75 
  -2   0   2  794.25   48.69 
  -2   0   2  739.56   48.58 
   2   0  -2  783.24   48.73 
  -2   0   2  742.79   48.70 
   2   0  -2  750.55   48.71 
  -2   0   2  723.65   48.80 
   2   0  -2  765.18   48.86 
  -2   0   2  756.27   48.69 
   2   0  -2  790.61   48.71 
  -2   0   2  804.70   48.91 
  -2   0   2  770.94   48.63 
   1   0  -2   -0.08    0.44 
  -1   0   2    0.16    0.35 
  -1   0   2   -0.03    0.42 
   1   0  -2    0.60    0.51 
  -1   0   2    0.26    0.37 
   1   0  -2    0.85    0.56 
  -1   0   2   -0.44    0.43 
  -1   0   2    1.10    0.60 
  -1   0   2    0.56    0.34 
   1   0  -2    0.19    0.43 
   1   0  -2    0.26    0.60 
  -1   0   2    0.34    0.33 
  -1   0   2   -0.14    0.28 
   1   0  -2    0.22    0.39 
  -1   0   2   -0.36    0.42 
  -1   0   2   -0.09    0.28 
  -1   0   2    0.60    0.43 
   1   0  -2    0.26    0.37 
   1   0  -2   -0.35    0.35 
   1   0  -2    0.51    0.56 
  -1   0   2   -0.09    0.41 
  -1   0   2    0.37    0.41 
  -1   0   2   -0.32    0.44 
  -1   0   2    0.28    0.55 
  -1   0   2    0.52    0.33 
  -1   0   2   -0.41    0.42 
  -1   0   2    0.13    0.46 
  -1   0   2    0.35    0.34 
  -1   0   2    0.36    0.39 
   1   0  -2    0.18    0.50 
   1   0  -2   -0.10    0.34 
  -1   0   2   -0.54    0.34 
  -1   0   2   -0.49    0.49 
  -1   0   2   -0.11    0.55 
   1   0  -2    0.40    0.39 
  -1   0   2   -0.06    0.44 
  -1   0   2   -0.07    0.30 
   1   0  -2    0.03    0.34 
  -1   0   2   -0.75    0.50 
  -1   0   2    0.29    0.41 
  -1   0   2    0.17    0.32 
   0   0  -2  231.16   15.24 
   0   0   2  236.92   15.17 
  -1   0  -2    0.22    0.48 
   1   0   2    0.46    0.57 
   1   0   2    1.02    0.43 
   1   0   2   -0.25    0.47 
  -1   0  -2    0.65    0.51 
  -1   0  -2   -0.51    0.40 
  -1   0  -2   -0.51    0.49 
  -1   0  -2    0.74    0.48 
  -1   0  -2   -0.35    0.47 
   1   0   2    0.15    0.43 
   1   0   2    0.15    0.47 
   1   0   2    0.15    0.51 
   1   0   2    0.37    0.55 
  -1   0  -2    0.01    0.35 
   1   0   2    0.17    0.43 
  -1   0  -2   -0.18    0.46 
   1   0   2    0.19    0.45 
  -1   0  -2    0.82    0.62 
   1   0   2    0.23    0.58 
  -1   0  -2    0.32    0.51 
   1   0   2   -0.18    0.38 
  -1   0  -2    0.04    0.48 
   1   0   2    0.92    0.46 
   1   0   2   -0.33    0.60 
   1   0   2   -0.08    0.81 
   1   0   2    0.37    0.41 
   1   0   2    0.07    0.54 
  -1   0  -2   -0.39    0.53 
   1   0   2   -0.22    0.28 
   1   0   2    0.30    0.45 
  -1   0  -2    0.32    0.38 
   1   0   2    0.19    0.47 
  -1   0  -2    0.00    0.49 
   1   0   2   -0.75    0.41 
  -1   0  -2   -0.16    0.52 
   1   0   2   -0.14    0.53 
   1   0   2    0.07    0.41 
  -1   0  -2    0.14    0.40 
  -1   0  -2    0.65    0.49 
  -1   0  -2    0.01    0.46 
  -1   0  -2   -0.04    0.49 
  -1   0  -2    0.34    0.46 
   1   0   2   -0.62    0.40 
  -2   0  -2    7.25    1.21 
   2   0   2    7.56    1.11 
  -2   0  -2    7.94    0.98 
   2   0   2    7.05    1.04 
   2   0   2    7.43    0.86 
   2   0   2    8.84    1.15 
   2   0   2    8.39    1.04 
   2   0   2    7.34    0.96 
  -2   0  -2    7.64    1.11 
  -2   0  -2   10.03    1.28 
  -2   0  -2    7.74    1.10 
   2   0   2    7.80    1.11 
  -2   0  -2   10.28    1.29 
  -2   0  -2    7.40    0.87 
  -2   0  -2    6.68    0.88 
  -2   0  -2    6.71    1.10 
  -2   0  -2    8.43    1.16 
  -2   0  -2    8.44    1.08 
  -2   0  -2    7.92    1.19 
   2   0   2    8.82    1.15 
  -2   0  -2   11.33    1.46 
   2   0   2    6.61    1.09 
   2   0   2    9.42    1.31 
  -2   0  -2    8.24    1.21 
   2   0   2    9.65    1.05 
   2   0   2    8.09    1.29 
  -2   0  -2    8.58    0.87 
   2   0   2    6.16    1.08 
   2   0   2    8.75    1.11 
  -2   0  -2    7.99    1.08 
  -2   0  -2    8.89    1.30 
  -2   0  -2    7.63    1.06 
  -2   0  -2    7.65    1.64 
  -2   0  -2    6.03    1.01 
   2   0   2    6.44    0.88 
   2   0   2    8.63    1.14 
  -2   0  -2    5.11    1.22 
   2   0   2    8.68    1.16 
  -2   0  -2    9.59    1.23 
   2   0   2    7.37    1.23 
  -2   0  -2    8.40    1.23 
  -2   0  -2    9.04    1.26 
  -2   0  -2    6.52    0.83 
   2   0   2    9.30    1.10 
  -2   0  -2    8.55    1.14 
   2   0   2    8.26    1.05 
   2   0   2    6.80    1.23 
   2   0   2    7.48    1.22 
   2   0   2    6.97    1.09 
   2   0   2    6.52    0.87 
   2   0   2    6.67    1.17 
   3   0   2   -0.34    0.60 
  -3   0  -2    0.24    1.26 
   3   0   2   -0.54    1.00 
  -3   0  -2   -0.40    0.99 
   3   0   2   -0.38    0.87 
  -3   0  -2    0.02    0.89 
   3   0   2    1.16    0.90 
  -3   0  -2    0.12    0.98 
   3   0   2    0.08    1.01 
  -3   0  -2   -0.45    1.10 
  -3   0  -2    1.59    0.87 
  -3   0  -2    1.16    0.76 
  -3   0  -2    0.89    0.97 
   3   0   2   -0.82    0.63 
   3   0   2    0.01    0.50 
   3   0   2   -0.48    0.67 
   3   0   2   -0.89    0.93 
   3   0   2   -1.40    0.58 
  -3   0  -2    0.48    0.81 
  -3   0  -2    0.07    0.76 
   3   0   2   -0.73    1.03 
   3   0   2   -0.70    0.70 
   3   0   2    0.21    0.63 
  -3   0  -2    1.43    0.70 
  -3   0  -2   -0.22    0.49 
  -3   0  -2   -0.33    0.93 
   3   0   2   -0.85    1.09 
  -3   0  -2   -0.23    0.73 
  -3   0  -2   -0.39    1.06 
   3   0   2    0.09    0.85 
   3   0   2    0.36    0.65 
   3   0   2   -0.55    1.59 
  -3   0  -2    0.41    0.98 
  -3   0  -2    0.01    0.87 
   3   0   2    0.56    0.89 
  -3   0  -2    0.99    1.07 
  -3   0  -2    0.52    0.68 
   3   0   2    0.03    0.81 
   3   0   2   -0.09    0.83 
  -3   0  -2   -0.63    0.80 
  -3   0  -2    1.00    0.80 
  -3   0  -2   -0.25    0.70 
  -4   0  -2  183.09   12.43 
  -4   0  -2  173.90   12.60 
   4   0   2  174.01   12.13 
  -4   0  -2  187.99   12.23 
  -4   0  -2  180.77   12.61 
   4   0   2  191.17   12.25 
   4   0   2  184.93   12.48 
  -4   0  -2  160.83   12.79 
   4   0   2  184.96   12.21 
   4   0   2  180.35   12.54 
   4   0   2  168.80   12.21 
  -4   0  -2  181.07   12.50 
  -4   0  -2  179.03   12.20 
   4   0   2  185.12   12.05 
   4   0   2  173.28   12.74 
   4   0   2  178.25   12.53 
  -4   0  -2  185.48   12.56 
  -4   0  -2  183.17   12.49 
   4   0   2  166.55   12.43 
   4   0   2  183.50   12.48 
   4   0   2  196.11   12.08 
  -4   0  -2  177.84   12.29 
   4   0   2  170.93   13.25 
  -4   0  -2  179.27   11.87 
   4   0   2  182.62   12.57 
  -4   0  -2  168.29   12.55 
   4   0   2  179.59   12.40 
  -4   0  -2  178.39   12.71 
   4   0   2  171.11   12.28 
   4   0   2  185.99   12.50 
  -5   0  -2   -0.67    1.41 
  -5   0  -2    0.29    1.16 
  -5   0  -2    2.05    1.35 
   5   0   2    0.58    1.17 
  -5   0  -2    1.58    1.46 
   5   0   2   -0.25    0.68 
   5   0   2    0.61    1.12 
  -5   0  -2   -1.14    1.16 
   5   0   2    0.03    1.19 
  -5   0  -2    0.20    0.96 
   5   0   2    0.46    1.04 
   5   0   2    0.06    1.24 
  -5   0  -2   -0.83    1.47 
  -5   0  -2   -0.84    1.20 
   5   0   2   -0.53    1.27 
  -5   0  -2    1.69    0.99 
   5   0   2   -1.65    1.70 
  -5   0  -2   -0.25    1.30 
   5   0   2   -0.83    1.02 
   5   0   2    1.67    1.40 
   5   0   2    0.25    0.70 
  -5   0  -2   -0.17    1.08 
   5   0   2   -0.62    1.14 
   5   0   2    1.82    1.25 
   5   0   2    0.13    1.13 
  -6   0  -2   63.27    5.61 
  -6   0  -2   52.86    5.05 
   6   0   2   54.01    5.14 
  -6   0  -2   52.71    5.17 
   6   0   2   61.57    5.40 
  -6   0  -2   52.02    5.33 
   6   0   2   53.61    5.54 
  -6   0  -2   61.70    5.81 
   6   0   2   49.94    5.66 
   6   0   2   54.79    5.52 
  -6   0  -2   52.70    5.42 
  -6   0  -2   51.52    4.73 
   6   0   2   56.85    5.19 
  -6   0  -2   49.93    4.58 
  -6   0  -2   65.18    5.83 
   6   0   2   63.62    7.02 
   6   0   2   50.36    4.87 
   6   0   2   56.70    5.21 
   6   0   2   52.61    4.78 
   6   0   2   53.99    4.23 
   6   0   2   56.94    5.10 
   6   0   2   62.34    4.93 
  -6   0  -2   51.88    5.99 
   6   0   2   60.31    5.83 
   6   0   2   49.05    5.17 
  -6   0  -2   63.27    5.43 
  -6   0  -2   60.54    5.72 
   7   0   2    2.10    1.67 
   7   0   2   -1.23    1.57 
   7   0   2   -0.97    1.71 
  -7   0  -2    1.09    1.96 
   7   0   2   -1.40    1.47 
  -7   0  -2    1.33    2.29 
  -7   0  -2    3.54    2.29 
   7   0   2    0.83    1.92 
   7   0   2   -0.36    1.62 
  -7   0  -2   -1.21    1.68 
   7   0   2   -1.76    1.33 
   7   0   2   -0.94    1.45 
   7   0   2    0.72    1.68 
  -7   0  -2    0.24    2.39 
  -7   0  -2   -1.10    1.27 
  -7   0  -2   -0.30    2.08 
   7   0   2    1.96    3.02 
  -7   0  -2    1.00    1.88 
   7   0   2   -2.21    1.47 
  -7   0  -2   -0.46    1.96 
  -7   0  -2   -1.08    1.19 
   7   0   2   -1.08    1.49 
   7   0   2    0.11    2.04 
  -7   0  -2    0.14    2.04 
  -7   0  -2    0.44    1.71 
   7   0   2   -2.98    1.52 
  -8   0  -2   61.73    6.62 
   8   0   2   67.70    6.61 
   8   0   2   59.91    6.56 
   8   0   2   49.66    5.76 
   8   0   2   71.54    6.86 
  -8   0  -2   75.36    7.14 
   8   0   2   50.21    6.25 
  -8   0  -2   56.63    7.29 
  -8   0  -2   62.53    5.53 
   8   0   2   46.59    6.66 
  -8   0  -2   66.24    7.04 
  -8   0  -2   67.70    7.78 
  -8   0  -2   76.51    7.05 
  -8   0  -2   60.70    6.16 
   8   0   2   62.94    6.61 
   8   0   2   63.23    6.15 
   8   0   2   64.14    5.81 
  -8   0  -2   72.93    7.22 
   8   0   2   50.93    6.39 
  -8   0  -2   59.78    7.13 
   8   0   2   58.58    5.72 
   8   0   2   61.69    6.39 
  -8   0  -2   63.95    6.83 
   8   0   2   63.08    5.93 
  -8   0  -2   66.44    7.51 
   9   0   2    0.05    1.93 
   9   0   2    1.50    2.31 
  -9   0  -2    1.49    2.52 
  -9   0  -2   -2.13    2.96 
   9   0   2    1.83    2.50 
   9   0   2    0.06    2.13 
   9   0   2   -0.37    2.29 
   9   0   2    2.68    2.19 
  -9   0  -2    1.63    2.21 
   9   0   2   -0.02    2.23 
  -9   0  -2   -1.16    2.33 
  -9   0  -2    3.53    2.87 
  -9   0  -2   -1.38    2.23 
  -9   0  -2   -0.66    2.63 
  -9   0  -2   -0.83    2.31 
   9   0   2   -0.72    1.98 
  -9   0  -2    3.20    3.28 
  -9   0  -2    3.12    2.56 
   9   0   2   -2.06    2.00 
  -9   0  -2   -1.90    2.65 
   9   0   2    0.19    2.30 
 -10   0  -2   40.79    6.36 
  10   0   2   40.93    5.66 
 -10   0  -2   43.96    7.05 
  10   0   2   46.36    6.20 
  10   0   2   45.98    5.87 
 -10   0  -2   41.80    5.91 
  10   0   2   41.74    5.85 
  10   0   2   35.10    5.43 
  10   0   2   52.48    6.28 
 -10   0  -2   49.97    6.64 
 -10   0  -2   41.40    6.94 
  10   0   2   31.03    5.28 
 -10   0  -2   47.46    6.67 
 -10   0  -2   44.48    6.10 
  10   0   2   30.40    5.06 
 -10   0  -2   45.00    6.85 
 -10   0  -2   60.41    7.43 
 -10   0  -2   49.15    6.31 
  10   0   2   39.18    5.42 
 -10   0  -2   51.37    6.61 
  10  -1  -2   14.09    3.87 
  10  -1  -2   10.07    4.65 
 -10  -1   2   12.30    4.34 
 -10  -1   2   12.26    3.86 
 -10  -1   2   15.67    3.87 
 -10  -1   2   15.83    4.45 
  10  -1  -2    8.79    3.20 
 -10  -1   2   15.88    4.02 
  10  -1  -2   17.80    4.53 
 -10  -1   2   15.89    4.16 
  10  -1  -2    5.38    3.07 
 -10  -1   2   15.78    4.84 
  10  -1  -2   14.98    3.55 
  10  -1  -2    6.05    3.01 
 -10  -1   2   13.23    4.16 
  10  -1  -2   12.64    3.57 
 -10  -1   2   12.26    4.26 
 -10  -1   2   14.05    3.74 
 -10   1   2    9.88    4.02 
  10   1  -2   10.44    3.27 
  10   1  -2    7.31    4.69 
 -10   1   2   19.14    5.41 
 -10   1   2   14.66    4.00 
  10   1  -2   14.01    3.43 
  10   1  -2   12.77    3.53 
 -10   1   2   16.07    4.54 
 -10   1   2   22.63    4.41 
 -10   1   2   11.72    4.65 
 -10   1   2   23.97    4.65 
  10   1  -2   13.42    3.37 
 -10   1   2    8.07    3.89 
 -10   1   2   10.07    3.50 
 -10   1   2   17.45    3.95 
  10   1  -2    6.68    3.41 
 -10   1   2   20.45    4.92 
  10   1  -2   14.45    3.76 
 -10   1   2   19.64    5.39 
   9  -1  -2  128.87   11.77 
  -9  -1   2  139.45   11.45 
  -9  -1   2  126.41   11.58 
  -9  -1   2  122.57   10.74 
  -9  -1   2  132.11   10.96 
  -9  -1   2  139.77   10.56 
   9  -1  -2   98.69   11.98 
   9  -1  -2  122.28   10.50 
  -9  -1   2  106.32   10.42 
   9  -1  -2  118.09   10.39 
   9  -1  -2  119.27   10.37 
   9  -1  -2  138.49   10.60 
   9  -1  -2  134.25   10.69 
   9  -1  -2  141.15   10.88 
  -9  -1   2  124.05   11.63 
  -9  -1   2  124.53   11.37 
   9  -1  -2  106.08   10.44 
  -9  -1   2  120.00   10.85 
  -9  -1   2  127.43   11.32 
  -9   1   2  130.04   11.51 
   9   1  -2  130.29   10.87 
  -9   1   2  126.83   11.50 
  -9   1   2  137.84   12.27 
  -9   1   2  137.41   11.23 
  -9   1   2  122.32   10.87 
   9   1  -2  134.44   10.62 
  -9   1   2  147.42   11.04 
   9   1  -2  159.53   12.94 
  -9   1   2  130.56   10.69 
  -9   1   2  127.54   10.87 
  -9   1   2  163.17   11.65 
  -9   1   2  152.22   12.19 
  -9   1   2  111.46   10.82 
  -9   1   2  124.77   11.44 
   9   1  -2  133.67   10.67 
   9   1  -2  113.38   10.43 
   9   1  -2  129.06   10.48 
   9   1  -2  140.59   10.76 
   9   1  -2  129.08   12.23 
   8  -1  -2   18.41    4.56 
  -8  -1   2   23.53    4.53 
  -8  -1   2   20.50    4.17 
   8  -1  -2   21.93    3.76 
  -8  -1   2   14.18    3.57 
   8  -1  -2   25.40    3.66 
   8  -1  -2   21.87    3.57 
   8  -1  -2   17.00    3.13 
  -8  -1   2   23.22    3.07 
   8  -1  -2   23.13    3.26 
  -8  -1   2   22.85    4.25 
   8  -1  -2   28.46    3.96 
  -8  -1   2   23.60    3.77 
   8  -1  -2   25.21    4.23 
   8  -1  -2   22.59    3.76 
   8  -1  -2   15.88    3.47 
  -8  -1   2   23.59    4.13 
  -8  -1   2   15.33    3.35 
  -8  -1   2   25.40    3.64 
   8  -1  -2   14.14    3.86 
   8  -1  -2   17.60    3.25 
  -8   1   2   23.08    3.96 
  -8   1   2   18.35    3.63 
   8   1  -2   16.86    2.86 
  -8   1   2   18.93    4.65 
  -8   1   2   17.00    3.31 
   8   1  -2   22.53    3.67 
   8   1  -2   25.33    3.79 
  -8   1   2   22.06    4.53 
   8   1  -2   23.16    3.93 
   8   1  -2   19.92    3.45 
  -8   1   2   22.29    4.35 
  -8   1   2   22.13    3.99 
   8   1  -2   15.41    2.81 
  -8   1   2   24.58    4.47 
   8   1  -2   23.22    5.05 
  -8   1   2   20.63    3.89 
  -8   1   2   16.36    3.56 
   8   1  -2   17.28    3.41 
   8   1  -2   19.98    4.02 
   8   1  -2   19.28    3.28 
   8   1  -2   15.12    3.13 
  -8   1   2   22.11    3.67 
  -8   1   2   19.98    4.35 
   7  -1  -2   61.50    7.78 
   7  -1  -2   65.12    6.25 
  -7  -1   2   74.25    6.81 
   7  -1  -2   67.00    6.21 
  -7  -1   2   78.26    6.52 
   7  -1  -2   63.46    6.56 
   7  -1  -2   65.16    5.78 
  -7  -1   2   67.15    7.28 
   7  -1  -2   67.38    6.06 
  -7  -1   2   69.20    6.43 
   7  -1  -2   73.70    6.41 
  -7  -1   2   75.06    5.36 
   7  -1  -2   60.66    6.04 
  -7  -1   2   68.95    6.39 
  -7  -1   2   66.81    5.78 
   7  -1  -2   66.00    7.23 
   7  -1  -2   73.76    6.34 
  -7  -1   2   74.50    6.89 
  -7  -1   2   63.17    6.16 
   7  -1  -2   68.64    5.91 
  -7  -1   2   54.34    5.85 
   7  -1  -2   67.56    6.14 
   7  -1  -2   61.63    6.12 
   7   1  -2   62.20    7.47 
   7   1  -2   59.38    6.89 
  -7   1   2   62.57    6.49 
   7   1  -2   70.20    6.44 
  -7   1   2   68.86    7.24 
  -7   1   2   69.81    7.49 
  -7   1   2   68.11    5.19 
   7   1  -2   73.69    6.22 
   7   1  -2   62.42    5.82 
  -7   1   2   76.85    6.39 
  -7   1   2   74.31    6.66 
  -7   1   2   71.71    6.85 
   7   1  -2   63.70    5.68 
   7   1  -2   66.72    6.16 
  -7   1   2   68.72    6.75 
   7   1  -2   65.43    6.19 
   7   1  -2   75.34    6.36 
   7   1  -2   64.95    6.19 
  -7   1   2   77.08    7.74 
  -7   1   2   69.79    5.02 
   7   1  -2   68.99    5.70 
  -7   1   2   64.63    6.40 
   7   1  -2   66.36    5.92 
   6  -1  -2    2.78    1.61 
   6  -1  -2    6.91    2.21 
  -6  -1   2    1.28    1.64 
  -6  -1   2    1.15    1.55 
  -6  -1   2    5.26    2.23 
   6  -1  -2    0.42    1.51 
   6  -1  -2    3.83    1.79 
  -6  -1   2    2.99    1.78 
   6  -1  -2    2.88    1.65 
   6  -1  -2    1.88    1.60 
  -6  -1   2    4.02    1.18 
   6  -1  -2    3.49    1.80 
   6  -1  -2    0.74    1.47 
   6  -1  -2    0.13    1.01 
   6  -1  -2    3.96    1.68 
  -6  -1   2    3.02    1.67 
   6  -1  -2    3.66    1.79 
   6  -1  -2    2.74    1.92 
   6  -1  -2    0.17    1.52 
   6  -1  -2    4.69    1.62 
  -6  -1   2    4.40    2.10 
  -6  -1   2    2.13    1.84 
  -6  -1   2    4.37    1.58 
  -6  -1   2    1.98    1.53 
   6  -1  -2    2.74    0.98 
   6   1  -2    2.12    1.35 
  -6   1   2    2.58    0.90 
   6   1  -2    1.84    1.39 
   6   1  -2    2.72    1.48 
   6   1  -2    4.01    1.18 
  -6   1   2    6.12    2.26 
  -6   1   2    3.95    1.95 
   6   1  -2    1.52    1.74 
  -6   1   2    1.69    1.97 
   6   1  -2   -2.30    1.29 
  -6   1   2    4.13    2.23 
   6   1  -2    4.49    1.95 
   6   1  -2    4.55    1.63 
  -6   1   2    2.42    0.84 
  -6   1   2    4.78    1.86 
  -6   1   2    7.49    2.58 
  -6   1   2    4.68    1.78 
  -6   1   2    2.55    1.06 
  -6   1   2    3.94    1.71 
   6   1  -2    5.08    2.54 
  -6   1   2    3.04    0.98 
   6   1  -2    0.25    1.36 
   6   1  -2    1.77    1.22 
  -6   1   2    4.32    1.91 
   6   1  -2    1.44    1.59 
   6   1  -2    4.12    1.73 
   5  -1  -2    1.69    1.15 
   5  -1  -2    2.67    1.37 
   5  -1  -2   -0.60    1.16 
   5  -1  -2    1.75    1.29 
   5  -1  -2   -0.75    1.22 
  -5  -1   2    0.17    1.27 
  -5  -1   2    1.55    1.27 
   5  -1  -2    6.53    1.76 
  -5  -1   2   -1.17    1.33 
   5  -1  -2    1.42    1.11 
   5  -1  -2   -0.02    1.30 
  -5  -1   2    0.92    1.42 
  -5  -1   2    0.23    1.15 
   5  -1  -2    0.98    1.34 
  -5  -1   2    1.31    1.17 
  -5  -1   2    0.83    0.78 
  -5  -1   2    0.70    1.47 
   5  -1  -2    1.65    1.37 
   5  -1  -2    0.58    0.63 
   5  -1  -2    1.72    1.18 
  -5  -1   2   -0.73    1.15 
   5  -1  -2    1.76    0.75 
   5  -1  -2   -0.86    0.81 
   5  -1  -2    0.55    1.14 
   5  -1  -2    3.01    1.36 
   5   1  -2    0.93    0.93 
   5   1  -2    3.30    1.56 
   5   1  -2    1.01    1.25 
  -5   1   2    6.14    2.00 
   5   1  -2    2.95    1.30 
   5   1  -2    1.65    1.25 
  -5   1   2    1.59    1.62 
   5   1  -2    0.12    0.79 
  -5   1   2    0.77    0.71 
  -5   1   2    0.79    1.14 
  -5   1   2    0.02    0.59 
   5   1  -2   -0.73    1.06 
  -5   1   2    1.52    1.44 
   5   1  -2    3.25    1.83 
  -5   1   2    0.72    0.63 
  -5   1   2   -0.44    1.32 
  -5   1   2    0.85    1.60 
  -5   1   2    2.01    1.31 
   5   1  -2   -0.49    0.98 
   5   1  -2    0.53    1.28 
  -5   1   2    2.02    1.27 
   5   1  -2    2.70    1.12 
   5   1  -2    0.99    1.01 
   5   1  -2    0.55    0.99 
   4  -1  -2   19.96    2.08 
   4  -1  -2   15.69    2.52 
  -4  -1   2   14.63    1.80 
  -4  -1   2   19.54    1.98 
  -4  -1   2   23.59    2.34 
  -4  -1   2   18.18    2.50 
  -4  -1   2   18.62    2.23 
   4  -1  -2   17.21    2.26 
  -4  -1   2   16.24    2.36 
  -4  -1   2   17.63    2.14 
  -4  -1   2   21.24    2.86 
  -4  -1   2   17.46    2.46 
   4  -1  -2   15.77    2.48 
   4  -1  -2   20.87    2.57 
   4  -1  -2   14.60    2.02 
   4  -1  -2   22.69    2.25 
  -4  -1   2   15.83    2.66 
  -4  -1   2   19.26    1.97 
   4  -1  -2   16.33    2.24 
   4  -1  -2   16.88    2.25 
   4  -1  -2   15.12    2.25 
   4  -1  -2   17.17    2.64 
  -4  -1   2   17.95    2.36 
   4  -1  -2   20.41    2.41 
   4  -1  -2   16.99    1.62 
  -4  -1   2   19.53    2.36 
   4  -1  -2   18.23    3.04 
   4  -1  -2   18.18    2.19 
   4  -1  -2   19.20    2.29 
   4  -1  -2   19.65    2.56 
   4   1  -2   17.63    1.87 
   4   1  -2   17.54    2.04 
   4   1  -2   22.71    2.24 
  -4   1   2   20.05    2.37 
  -4   1   2   19.74    2.52 
  -4   1   2   13.86    2.51 
  -4   1   2   21.89    2.78 
  -4   1   2   17.78    1.62 
  -4   1   2   18.71    2.37 
   4   1  -2   21.35    2.55 
   4   1  -2   20.77    2.40 
  -4   1   2   23.10    2.78 
   4   1  -2   22.14    3.05 
   4   1  -2   20.66    2.34 
  -4   1   2   14.46    2.47 
  -4   1   2   18.16    1.82 
   4   1  -2   19.00    2.62 
   4   1  -2   18.99    1.98 
   4   1  -2   17.58    2.41 
   4   1  -2   18.72    2.39 
  -4   1   2   18.15    2.65 
   4   1  -2   20.45    2.36 
   4   1  -2   16.30    2.08 
  -4   1   2   15.78    2.91 
  -4   1   2   17.34    1.79 
  -3  -1   2   11.51    1.35 
   3  -1  -2    9.76    1.29 
  -3  -1   2    8.10    1.27 
  -3  -1   2   10.40    1.38 
  -3  -1   2   11.06    1.20 
   3  -1  -2    9.00    1.74 
   3  -1  -2    8.07    1.60 
   3  -1  -2   10.67    1.66 
  -3  -1   2    8.75    1.76 
  -3  -1   2   10.09    1.46 
  -3  -1   2    8.74    1.76 
   3  -1  -2   10.08    1.70 
   3  -1  -2   10.25    1.39 
  -3  -1   2   10.92    1.59 
  -3  -1   2    9.61    1.42 
  -3  -1   2    8.83    1.51 
   3  -1  -2    8.99    1.48 
  -3  -1   2   11.63    1.70 
  -3  -1   2   12.63    1.51 
   3  -1  -2   10.17    0.98 
   3  -1  -2    9.01    1.49 
   3  -1  -2    7.83    1.60 
  -3  -1   2    8.82    0.96 
   3  -1  -2   14.00    2.10 
   3  -1  -2   10.33    1.43 
   3  -1  -2    9.54    1.55 
  -3  -1   2    9.89    1.63 
   3  -1  -2    8.27    1.75 
   3  -1  -2    6.81    1.26 
   3  -1  -2   10.89    1.53 
  -3  -1   2   10.39    1.26 
   3  -1  -2    9.12    1.61 
   3  -1  -2    8.98    1.52 
   3  -1  -2   12.43    1.62 
   3  -1  -2    8.98    1.63 
  -3  -1   2   11.87    1.44 
  -3  -1   2    9.50    1.22 
  -3  -1   2    9.67    1.59 
   3   1  -2   11.45    1.33 
   3   1  -2    8.83    1.46 
  -3   1   2    8.20    1.35 
  -3   1   2   10.38    1.73 
  -3   1   2    9.33    1.66 
   3   1  -2    9.84    1.72 
   3   1  -2    8.42    1.91 
   3   1  -2    7.44    1.37 
  -3   1   2   12.67    1.89 
   3   1  -2    8.61    1.40 
   3   1  -2    9.60    1.31 
  -3   1   2    9.61    1.44 
   3   1  -2   11.80    1.43 
  -3   1   2    6.51    1.48 
  -3   1   2    7.84    1.36 
   3   1  -2   10.23    1.20 
  -3   1   2    8.57    0.93 
  -3   1   2   10.63    1.46 
   3   1  -2   10.03    1.68 
  -3   1   2    9.32    1.52 
  -3   1   2   11.80    1.29 
  -3   1   2   12.05    1.96 
  -3   1   2   10.35    1.59 
  -3   1   2   11.65    1.56 
   3   1  -2    8.21    1.18 
  -3   1   2    6.54    1.80 
  -3   1   2    8.07    1.41 
   3   1  -2   11.91    2.09 
   3   1  -2    9.14    1.47 
  -3   1   2    9.30    1.55 
   3   1  -2   12.30    1.79 
  -3   1   2   10.31    1.71 
  -3   1   2   13.82    1.90 
   3   1  -2   10.81    1.50 
  -3   1   2    6.71    1.60 
  -3   1   2    9.56    1.97 
  -3   1   2   10.23    1.22 
  -3   1   2   10.93    1.62 
   3   1  -2    9.85    1.57 
  -3   1   2    9.75    1.41 
  -2  -1   2    9.61    1.06 
  -2  -1   2   11.02    1.30 
   2  -1  -2    8.36    1.38 
  -2  -1   2    9.19    1.07 
  -2  -1   2    9.18    1.06 
  -2  -1   2    9.73    1.28 
   2  -1  -2   11.94    1.57 
  -2  -1   2   10.62    1.23 
   2  -1  -2    9.64    1.30 
   2  -1  -2   10.31    1.45 
  -2  -1   2   10.74    1.31 
   2  -1  -2    8.28    0.83 
  -2  -1   2   10.25    1.37 
   2  -1  -2    9.64    1.44 
  -2  -1   2    8.05    0.97 
  -2  -1   2    8.17    1.33 
  -2  -1   2   10.81    1.26 
  -2  -1   2    8.58    1.26 
   2  -1  -2    9.83    1.55 
   2  -1  -2    9.79    1.08 
   2  -1  -2   10.36    1.51 
  -2  -1   2    8.80    0.86 
   2  -1  -2   11.63    1.19 
  -2  -1   2    8.22    0.92 
   2  -1  -2   10.45    1.63 
  -2  -1   2    9.82    1.47 
  -2  -1   2   11.17    1.21 
  -2  -1   2    9.57    0.92 
   2  -1  -2   10.31    1.30 
  -2  -1   2    8.91    1.08 
   2  -1  -2    8.06    1.10 
   2  -1  -2   13.00    1.77 
   2  -1  -2   10.30    1.44 
   2  -1  -2    8.87    1.28 
   2  -1  -2    7.80    1.20 
  -2  -1   2   10.16    1.05 
  -2  -1   2    8.85    1.40 
   2  -1  -2    9.18    1.18 
  -2  -1   2   10.35    1.13 
   2  -1  -2   11.13    1.46 
   2  -1  -2   10.83    1.33 
   2  -1  -2   10.75    1.40 
   2  -1  -2   12.74    1.62 
   2  -1  -2    9.99    1.34 
  -2  -1   2    8.94    1.19 
   2  -1  -2   11.30    1.21 
  -2  -1   2   10.91    1.10 
  -2  -1   2   12.83    1.24 
  -2  -1   2   10.10    1.51 
   2  -1  -2   10.45    1.50 
  -2  -1   2    7.24    1.10 
   2   1  -2   10.52    1.21 
  -2   1   2   10.99    1.23 
  -2   1   2    8.87    1.67 
  -2   1   2    7.04    1.22 
   2   1  -2    8.99    1.34 
  -2   1   2    8.25    1.25 
   2   1  -2    8.65    1.18 
  -2   1   2    8.50    1.19 
   2   1  -2   10.54    1.31 
  -2   1   2   12.23    1.53 
  -2   1   2    8.49    1.11 
  -2   1   2    9.38    1.46 
  -2   1   2    9.69    1.62 
   2   1  -2    9.29    1.22 
  -2   1   2   15.38    1.75 
   2   1  -2    8.27    1.02 
  -2   1   2    9.32    1.33 
  -2   1   2   11.64    1.53 
   2   1  -2   10.94    1.15 
   2   1  -2    9.81    1.37 
   2   1  -2    8.40    0.85 
   2   1  -2   11.35    1.58 
  -2   1   2    7.40    1.18 
   2   1  -2    8.16    1.21 
  -2   1   2    9.26    1.39 
  -2   1   2    8.81    1.23 
   2   1  -2   12.26    1.45 
  -2   1   2    9.63    1.29 
   2   1  -2   10.90    1.17 
  -2   1   2    9.44    1.48 
  -2   1   2    8.17    1.14 
  -2   1   2   12.44    1.34 
   2   1  -2    9.65    1.11 
  -2   1   2   12.22    1.52 
   2   1  -2   10.19    0.92 
   2   1  -2   11.89    1.37 
  -2   1   2   11.88    1.59 
  -2   1   2   11.60    1.43 
   2   1  -2   10.86    1.29 
  -2   1   2   10.85    1.53 
   2   1  -2    8.24    1.02 
  -2   1   2    9.55    1.40 
  -2   1   2    6.38    1.29 
   1  -1  -2    8.90    1.37 
   1  -1  -2    9.05    1.13 
  -1  -1   2    8.16    0.78 
   1  -1  -2    8.46    1.62 
   1  -1  -2    9.21    1.35 
  -1  -1   2    7.36    0.91 
   1  -1  -2    5.76    1.14 
   1  -1  -2    7.08    1.32 
   1  -1  -2    5.25    0.88 
   1  -1  -2    7.59    1.13 
   1  -1  -2    8.55    1.22 
   1  -1  -2    7.23    1.08 
  -1  -1   2    7.92    1.20 
   1  -1  -2    8.39    1.31 
   1  -1  -2    8.63    1.18 
  -1  -1   2    8.85    0.91 
  -1  -1   2    6.69    0.78 
  -1  -1   2    6.47    0.86 
   1  -1  -2    7.56    1.17 
  -1  -1   2    7.35    0.89 
  -1  -1   2    8.39    1.11 
   1  -1  -2    8.68    1.17 
  -1  -1   2    7.61    1.01 
   1  -1  -2   10.41    1.71 
  -1  -1   2    8.73    1.12 
   1  -1  -2    9.42    1.34 
   1  -1  -2    9.48    1.19 
  -1  -1   2    6.89    1.02 
  -1  -1   2    8.17    0.96 
   1  -1  -2    7.44    0.81 
   1  -1  -2    9.02    1.27 
  -1  -1   2    9.26    0.87 
  -1  -1   2    6.88    1.21 
  -1  -1   2    8.44    0.83 
  -1  -1   2    7.31    0.89 
   1  -1  -2    5.27    0.85 
   1  -1  -2    8.21    1.27 
   1  -1  -2    8.54    1.16 
  -1  -1   2   10.08    0.94 
  -1  -1   2    8.78    0.95 
  -1  -1   2    6.77    0.95 
  -1  -1   2    9.42    0.92 
   1  -1  -2    8.94    1.13 
   1  -1  -2    7.29    0.97 
   1  -1  -2    6.17    1.19 
   1  -1  -2    7.69    1.17 
  -1   1   2    6.62    1.08 
   1   1  -2    7.97    0.90 
   1   1  -2    7.18    0.92 
  -1   1   2    7.64    1.07 
  -1   1   2    7.57    1.04 
  -1   1   2    8.75    1.16 
  -1   1   2    6.80    0.96 
   1   1  -2    8.84    1.16 
  -1   1   2   10.30    1.49 
  -1   1   2    8.83    1.17 
  -1   1   2    7.84    1.28 
  -1   1   2    9.38    1.19 
   1   1  -2    8.94    1.28 
  -1   1   2    7.17    1.34 
  -1   1   2    8.11    1.22 
   1   1  -2    6.59    1.01 
  -1   1   2    4.88    0.96 
   1   1  -2    6.85    0.95 
  -1   1   2    6.94    1.18 
  -1   1   2    8.85    1.22 
  -1   1   2    7.77    1.21 
  -1   1   2    7.14    1.26 
   1   1  -2    7.23    1.00 
   1   1  -2    7.06    0.89 
  -1   1   2    7.62    1.23 
  -1   1   2    9.64    1.45 
   1   1  -2   10.83    1.29 
  -1   1   2    7.49    1.21 
   1   1  -2    7.74    0.84 
  -1   1   2    6.49    1.09 
   1   1  -2    7.43    0.82 
  -1   1   2    9.01    1.29 
  -1   1   2    7.95    1.00 
   1   1  -2    9.02    0.94 
   1   1  -2    7.52    0.86 
  -1   1   2    7.08    1.10 
   1   1  -2    6.67    0.86 
  -1   1   2    7.68    1.47 
  -1   1   2    9.02    0.89 
  -1   1   2    7.05    1.05 
   1   1  -2    7.72    1.03 
   0  -1   2    5.22    0.72 
   0  -1  -2    4.48    1.19 
   0  -1   2    5.39    0.72 
   0  -1  -2    3.20    0.67 
   0  -1   2    4.88    0.76 
   0  -1   2    3.74    0.66 
   0  -1  -2    5.89    1.30 
   0  -1   2    4.75    0.59 
   0  -1   2    4.79    0.63 
   0  -1   2    4.38    0.63 
   0  -1   2    3.94    0.99 
   0  -1  -2    4.83    0.93 
   0  -1  -2    4.19    0.78 
   0  -1   2    5.62    0.61 
   0  -1   2    3.78    0.83 
   0  -1  -2    4.72    0.86 
   0  -1  -2    3.50    1.51 
   0  -1   2    4.46    0.67 
   0  -1  -2    1.59    1.47 
   0  -1   2    5.12    0.96 
   0  -1  -2    4.32    0.84 
   0  -1   2    6.12    1.53 
   0  -1   2    4.14    0.62 
   0  -1   2    2.42    1.00 
   0  -1   2    5.03    0.55 
   0  -1  -2    2.69    1.42 
   0  -1   2    3.91    0.50 
   0  -1  -2    2.26    2.37 
   0  -1  -2    4.74    0.91 
   0  -1   2    3.98    0.69 
   0  -1  -2    2.37    1.39 
   0  -1  -2    3.74    1.02 
   0  -1   2    4.74    0.51 
   0  -1   2    4.19    1.07 
   0  -1  -2    2.34    1.53 
   0  -1  -2    4.30    0.73 
   0  -1  -2    3.95    0.83 
   0  -1   2    5.46    1.01 
   0  -1   2    5.53    0.87 
   0  -1  -2    4.50    0.83 
   0   1   2    4.09    0.82 
   0   1  -2    4.86    0.70 
   0   1   2    3.42    1.61 
   0   1   2    4.38    0.67 
   0   1   2    4.04    0.60 
   0   1   2    4.58    0.91 
   0   1  -2    4.78    0.67 
   0   1  -2    3.82    0.68 
   0   1   2    4.07    0.78 
   0   1   2    4.02    0.92 
   0   1   2    4.00    0.81 
   0   1   2    3.76    0.81 
   0   1  -2    4.11    0.71 
   0   1  -2    5.62    1.43 
   0   1   2    5.33    0.86 
   0   1   2    4.41    0.75 
   0   1  -2    4.49    0.73 
   0   1  -2    3.37    0.68 
   0   1   2    5.70    0.66 
   0   1   2    4.77    0.80 
   0   1   2    4.40    2.64 
   0   1   2    4.99    0.94 
   0   1  -2    3.67    0.60 
   0   1   2    3.71    0.87 
   0   1   2    3.98    1.12 
   0   1   2    3.64    1.50 
   0   1   2    3.03    1.46 
   0   1   2    3.53    1.54 
   0   1   2    3.95    0.88 
   1  -1   2  128.02    8.52 
  -1  -1  -2  125.77    8.60 
  -1  -1  -2  119.81    8.55 
   1  -1   2  125.20    8.54 
   1  -1   2  122.64    8.54 
   1  -1   2  136.09    8.57 
  -1  -1  -2  125.68    8.52 
   1  -1   2  124.42    8.40 
  -1  -1  -2  126.49    8.51 
   1  -1   2  122.93    8.50 
   1  -1   2  130.22    8.60 
   1  -1   2  122.16    8.42 
  -1  -1  -2  136.63    8.74 
   1  -1   2  130.31    8.52 
   1  -1   2  129.34    8.55 
  -1  -1  -2  127.48    8.50 
   1  -1   2  124.26    8.39 
  -1  -1  -2  129.75    8.48 
   1  -1   2  130.17    8.53 
  -1  -1  -2  117.96    8.51 
  -1  -1  -2  129.68    8.78 
  -1  -1  -2  132.58    8.50 
   1  -1   2  125.16    8.54 
  -1  -1  -2  124.22    8.55 
   1  -1   2  125.27    8.47 
   1  -1   2  121.03    8.32 
  -1  -1  -2  122.74    8.60 
   1  -1   2  127.19    8.47 
  -1  -1  -2  128.56    8.53 
  -1  -1  -2  126.93    8.52 
  -1  -1  -2  122.95    8.51 
  -1  -1  -2  120.48    8.69 
  -1  -1  -2  126.79    8.53 
   1  -1   2  129.54    8.99 
  -1  -1  -2  121.31    8.53 
   1  -1   2  132.93    8.48 
   1  -1   2  128.41    8.46 
   1  -1   2  140.30    8.89 
  -1  -1  -2  129.17    8.48 
  -1  -1  -2  119.31    8.45 
   1  -1   2  126.69    8.55 
   1  -1   2  127.40    8.55 
   1  -1   2  125.59    8.58 
   1  -1   2  125.73    8.51 
  -1  -1  -2  129.02    8.54 
  -1  -1  -2  123.04    8.51 
  -1  -1  -2  118.49    8.49 
  -1  -1  -2  124.64    8.64 
   1   1   2  127.90    8.46 
  -1   1  -2  121.49    8.57 
   1   1   2  128.62    8.71 
  -1   1  -2  124.97    8.53 
  -1   1  -2  117.25    8.52 
   1   1   2  130.57    8.81 
   1   1   2  127.65    8.57 
   1   1   2  125.01    8.48 
   1   1   2  131.59    8.54 
   1   1   2  123.53    8.44 
  -1   1  -2  133.90    8.60 
  -1   1  -2  126.32    8.45 
  -1   1  -2  120.59    8.48 
   1   1   2  126.35    8.59 
   1   1   2  124.53    8.55 
   1   1   2  125.48    8.73 
   1   1   2  133.22    8.54
[truncated: 2,950,806 more chars]
