# Supplementary material
Source: MDPI journal article supplement (https://www.mdpi.com/2073-4352/13/7/1043)
Supplement: s1 [file s1 › 14 Lu(OAc)2Cl x 3H2O_Tabellen.pdf]

Table S1. Crystal data and structure refinement for Lu(OAc)2Cl\_x\_3H2O.

|                                   |                                                                              |
|-----------------------------------|------------------------------------------------------------------------------|
| Identification code               | Ha2019_67_0m_a                                                               |
| Empirical formula                 | C4 H12 Cl Lu O7                                                              |
| Formula weight                    | 382.56                                                                       |
| Temperature                       | 100(2) K                                                                     |
| Wavelength                        | 0.71073 Å                                                                    |
| Crystal system, space group       | Monoclinic, P2(1)/n                                                          |
| Unit cell dimensions              | a = 7.7668(3) Å<br>b = 7.8297(3) Å    β = 97.336(2) deg.<br>c = 17.0618(7) Å |
| Volume                            | 1029.06(7) Å <sup>3</sup>                                                    |
| Z, Calculated density             | 4, 2.469 Mg/m <sup>3</sup>                                                   |
| Absorption coefficient            | 9.857 mm <sup>-1</sup>                                                       |
| F(000)                            | 720                                                                          |
| Crystal size                      | 0.292 x 0.065 x 0.057 mm                                                     |
| Theta range for data collection   | 2.762 to 27.999 deg.                                                         |
| Limiting indices                  | -10 ≤ h ≤ 10, -10 ≤ k ≤ 10, -22 ≤ l ≤ 22                                     |
| Reflections collected / unique    | 100183 / 2490 [R(int) = 0.0653]                                              |
| Completeness to theta = 25.242    | 99.9 %                                                                       |
| Absorption correction             | Semi-empirical from equivalents                                              |
| Max. and min. transmission        | 0.749 and 0.356                                                              |
| Refinement method                 | Full-matrix least-squares on F <sup>2</sup>                                  |
| Data / restraints / parameters    | 2490 / 0 / 125                                                               |
| Goodness-of-fit on F <sup>2</sup> | 1.036                                                                        |
| Final R indices [I > 2σ(I)]       | R1 = 0.0119, wR2 = 0.0264                                                    |
| R indices (all data)              | R1 = 0.0143, wR2 = 0.0270                                                    |
| Extinction coefficient            | n/a                                                                          |
| Largest diff. peak and hole       | 0.365 and -0.421 e.Å <sup>-3</sup>                                           |

Table S2. Atomic coordinates ( $\times 10^4$ ) and equivalent isotropic displacement parameters ( $\text{\AA}^2 \times 10^3$ ) for  $\text{Lu}(\text{OAc})_2\text{Cl}\cdot 3\text{H}_2\text{O}$ .  $U(\text{eq})$  is defined as one third of the trace of the orthogonalized  $U_{ij}$  tensor.

|        | x         | y        | z        | U (eq) |
|--------|-----------|----------|----------|--------|
| Lu (1) | 2779 (1)  | 4453 (1) | 5425 (1) | 8 (1)  |
| Cl (1) | 3742 (1)  | 9541 (1) | 6817 (1) | 15 (1) |
| O (11) | 265 (2)   | 3197 (2) | 5452 (1) | 15 (1) |
| O (12) | -2579 (2) | 2951 (2) | 5245 (1) | 12 (1) |
| C (11) | -1099 (3) | 2368 (3) | 5511 (1) | 10 (1) |
| C (12) | -1003 (3) | 638 (3)  | 5891 (2) | 18 (1) |
| O (21) | 5409 (2)  | 5616 (2) | 5745 (1) | 11 (1) |
| O (22) | 8135 (2)  | 6332 (2) | 5897 (1) | 12 (1) |
| C (21) | 6780 (3)  | 6008 (3) | 6207 (1) | 10 (1) |
| C (22) | 6780 (3)  | 6054 (3) | 7077 (1) | 17 (1) |
| O (1W) | 4162 (2)  | 1853 (2) | 5375 (1) | 13 (1) |
| O (2W) | 1631 (2)  | 6337 (2) | 6255 (1) | 12 (1) |
| O (3W) | 3241 (2)  | 3438 (2) | 6729 (1) | 15 (1) |

Table S3. Bond lengths [Å] and angles [deg] for Lu(OAc)2Cl\_x\_3H2O.

---

|                       |            |
|-----------------------|------------|
| Lu(1)-O(11)           | 2.193(1)   |
| Lu(1)-O(21)           | 2.239(1)   |
| Lu(1)-O(2W)           | 2.302(2)   |
| Lu(1)-O(1W)           | 2.309(2)   |
| Lu(1)-O(12)#1         | 2.327(2)   |
| Lu(1)-O(3W)           | 2.346(2)   |
| Lu(1)-O(22)#2         | 2.358(2)   |
| Lu(1)-O(21)#2         | 2.585(2)   |
| Lu(1)-O(11)#1         | 3.211(2)   |
|                       |            |
| Lu(1)-Lu(1)#2         | 4.0016(2)  |
| Lu(1)-Lu(1)#1         | 4.4585(2)  |
|                       |            |
| O(11)-C(11)           | 1.257(2)   |
| O(12)-C(11)           | 1.266(2)   |
| C(11)-C(12)           | 1.500(3)   |
|                       |            |
| O(21)-C(21)           | 1.279(3)   |
| O(22)-C(21)           | 1.263(3)   |
| C(21)-C(22)           | 1.484(3)   |
|                       |            |
| O(11)-Lu(1)-O(21)     | 164.70(6)  |
| O(11)-Lu(1)-O(2W)     | 81.86(5)   |
| O(21)-Lu(1)-O(2W)     | 90.14(5)   |
| O(11)-Lu(1)-O(1W)     | 91.42(5)   |
| O(21)-Lu(1)-O(1W)     | 87.35(5)   |
| O(2W)-Lu(1)-O(1W)     | 143.75(5)  |
| O(11)-Lu(1)-O(12)#1   | 113.47(5)  |
| O(21)-Lu(1)-O(12)#1   | 76.48(5)   |
| O(2W)-Lu(1)-O(12)#1   | 74.67(5)   |
| O(1W)-Lu(1)-O(12)#1   | 138.97(5)  |
| O(11)-Lu(1)-O(3W)     | 81.76(6)   |
| O(21)-Lu(1)-O(3W)     | 83.26(5)   |
| O(2W)-Lu(1)-O(3W)     | 70.00(5)   |
| O(1W)-Lu(1)-O(3W)     | 73.79(5)   |
| O(12)#1-Lu(1)-O(3W)   | 138.93(5)  |
| O(11)-Lu(1)-O(22)#2   | 75.10(5)   |
| O(21)-Lu(1)-O(22)#2   | 119.55(5)  |
| O(2W)-Lu(1)-O(22)#2   | 131.49(5)  |
| O(1W)-Lu(1)-O(22)#2   | 79.59(5)   |
| O(12)#1-Lu(1)-O(22)#2 | 76.41(5)   |
| O(3W)-Lu(1)-O(22)#2   | 144.03(5)  |
| O(11)-Lu(1)-O(21)#2   | 125.51(5)  |
| O(21)-Lu(1)-O(21)#2   | 68.12(6)   |
| O(2W)-Lu(1)-O(21)#2   | 141.29(5)  |
| O(1W)-Lu(1)-O(21)#2   | 69.59(5)   |
| O(12)#1-Lu(1)-O(21)#2 | 69.41(5)   |
| O(3W)-Lu(1)-O(21)#2   | 133.83(5)  |
| O(22)#2-Lu(1)-O(21)#2 | 51.92(5)   |
| O(11)-Lu(1)-O(11)#1   | 70.26(6)   |
| O(21)-Lu(1)-O(11)#1   | 118.35(5)  |
| O(2W)-Lu(1)-O(11)#1   | 66.40(5)   |
| O(1W)-Lu(1)-O(11)#1   | 143.74(5)  |
| O(12)#1-Lu(1)-O(11)#1 | 43.25(4)   |
| O(3W)-Lu(1)-O(11)#1   | 130.56(5)  |
| O(22)#2-Lu(1)-O(11)#1 | 65.78(5)   |
| O(21)#2-Lu(1)-O(11)#1 | 95.34(4)   |
|                       |            |
| Lu(1)#2-Lu(1)-Lu(1)#1 | 133.215(5) |

|                     |          |
|---------------------|----------|
| C(11)-O(11)-Lu(1)   | 174.4(2) |
| C(11)-O(12)-Lu(1)#1 | 119.4(1) |
| O(11)-C(11)-O(12)   | 121.4(2) |
| O(11)-C(11)-C(12)   | 120.3(2) |
| O(12)-C(11)-C(12)   | 118.2(2) |
| C(21)-O(21)-Lu(1)   | 155.4(2) |
| C(21)-O(21)-Lu(1)#2 | 89.4(1)  |
| Lu(1)-O(21)-Lu(1)#2 | 111.9(6) |
| C(21)-O(22)-Lu(1)#2 | 100.6(1) |
| O(22)-C(21)-O(21)   | 117.5(2) |
| O(22)-C(21)-C(22)   | 121.4(2) |
| O(21)-C(21)-C(22)   | 121.1(2) |

---

Symmetry transformations used to generate equivalent atoms:  
 #1 -x,-y+1,-z+1      #2 -x+1,-y+1,-z+1

Table S4. Anisotropic displacement parameters ( $\text{\AA}^2 \times 10^3$ ) for Lu(OAc)<sub>2</sub>Cl<sub>2</sub>·3H<sub>2</sub>O.

The anisotropic displacement factor exponent takes the form:  
 $-2 \pi^2 [ h^2 a^{*2} U_{11} + \dots + 2 h k a^* b^* U_{12} ]$

|       | U <sub>11</sub> | U <sub>22</sub> | U <sub>33</sub> | U <sub>23</sub> | U <sub>13</sub> | U <sub>12</sub> |
|-------|-----------------|-----------------|-----------------|-----------------|-----------------|-----------------|
| Lu(1) | 5(1)            | 8(1)            | 11(1)           | 0(1)            | 1(1)            | -1(1)           |
| Cl(1) | 18(1)           | 11(1)           | 16(1)           | 1(1)            | 2(1)            | -2(1)           |
| O(11) | 10(1)           | 16(1)           | 20(1)           | -3(1)           | 5(1)            | -5(1)           |
| O(12) | 7(1)            | 13(1)           | 16(1)           | 2(1)            | 1(1)            | 0(1)            |
| C(11) | 10(1)           | 12(1)           | 8(1)            | -3(1)           | 3(1)            | -1(1)           |
| C(12) | 16(1)           | 16(1)           | 21(1)           | 4(1)            | 2(1)            | 2(1)            |
| O(21) | 8(1)            | 12(1)           | 12(1)           | -1(1)           | 0(1)            | 0(1)            |
| O(22) | 7(1)            | 13(1)           | 16(1)           | 0(1)            | 1(1)            | -1(1)           |
| C(21) | 10(1)           | 5(1)            | 15(1)           | 1(1)            | -1(1)           | 3(1)            |
| C(22) | 14(1)           | 26(1)           | 11(1)           | 0(1)            | 0(1)            | 1(1)            |
| O(1W) | 10(1)           | 12(1)           | 17(1)           | 2(1)            | 5(1)            | 1(1)            |
| O(2W) | 8(1)            | 12(1)           | 17(1)           | -3(1)           | 1(1)            | -1(1)           |
| O(3W) | 19(1)           | 12(1)           | 16(1)           | 2(1)            | 6(1)            | 3(1)            |

Table S5. Hydrogen coordinates ( $\times 10^4$ ) and isotropic displacement parameters ( $\text{\AA}^2 \times 10^3$ ) for  $\text{Lu}(\text{OAc})_2\text{Cl}\cdot 3\text{H}_2\text{O}$ .

|        | x     | y    | z    | U (eq) |
|--------|-------|------|------|--------|
| H(12A) | -1185 | -244 | 5481 | 48 (6) |
| H(12B) | -1904 | 543  | 6242 | 48 (6) |
| H(12C) | 141   | 485  | 6198 | 48 (6) |
| H(22A) | 7971  | 5927 | 7339 | 58 (6) |
| H(22B) | 6064  | 5118 | 7237 | 58 (6) |
| H(22C) | 6305  | 7147 | 7229 | 58 (6) |
| H(11W) | 4107  | 959  | 5756 | 45 (7) |
| H(12W) | 5364  | 1918 | 5299 | 45 (7) |
| H(21W) | 408   | 6538 | 6238 | 40 (6) |
| H(22W) | 2169  | 7408 | 6412 | 40 (6) |
| H(31W) | 2652  | 3935 | 7135 | 56 (7) |
| H(32W) | 3357  | 2250 | 6864 | 56 (7) |

Table S6. Hydrogen bonds for Lu(OAc)<sub>2</sub>Cl\_x\_3H<sub>2</sub>O [Å and deg.].

| D-H...A                | d(D-H) | d(H...A) | d(D...A) | <(DHA) |
|------------------------|--------|----------|----------|--------|
| O(1W)-H(11W)...Cl(1)#3 | 0.96   | 2.17     | 3.105(2) | 163.5  |
| O(1W)-H(12W)...O(12)#4 | 0.96   | 1.80     | 2.709(2) | 156.0  |
| O(2W)-H(21W)...O(22)#5 | 0.96   | 1.79     | 2.706(2) | 157.5  |
| O(2W)-H(22W)...Cl(1)   | 0.96   | 2.13     | 3.082(2) | 170.5  |
| O(3W)-H(31W)...Cl(1)#6 | 0.96   | 2.26     | 3.202(2) | 168.1  |
| O(3W)-H(32W)...Cl(1)#3 | 0.96   | 2.14     | 3.078(2) | 163.5  |

Symmetry transformations used to generate equivalent atoms:

#1 -x,-y+1,-z+1      #2 -x+1,-y+1,-z+1      #3 x,y-1,z  
#4 x+1,y,z      #5 x-1,y,z      #6 -x+1/2,y-1/2,-z+3/2
